# Supplementary material for: Challenges of COVID-19 Case Forecasting in the US, 2020-2021
Source: bioRxiv or medRxiv preprint supplement (doi:10.1101/2023.05.30.23290732), 2023-06-04

# Alabama

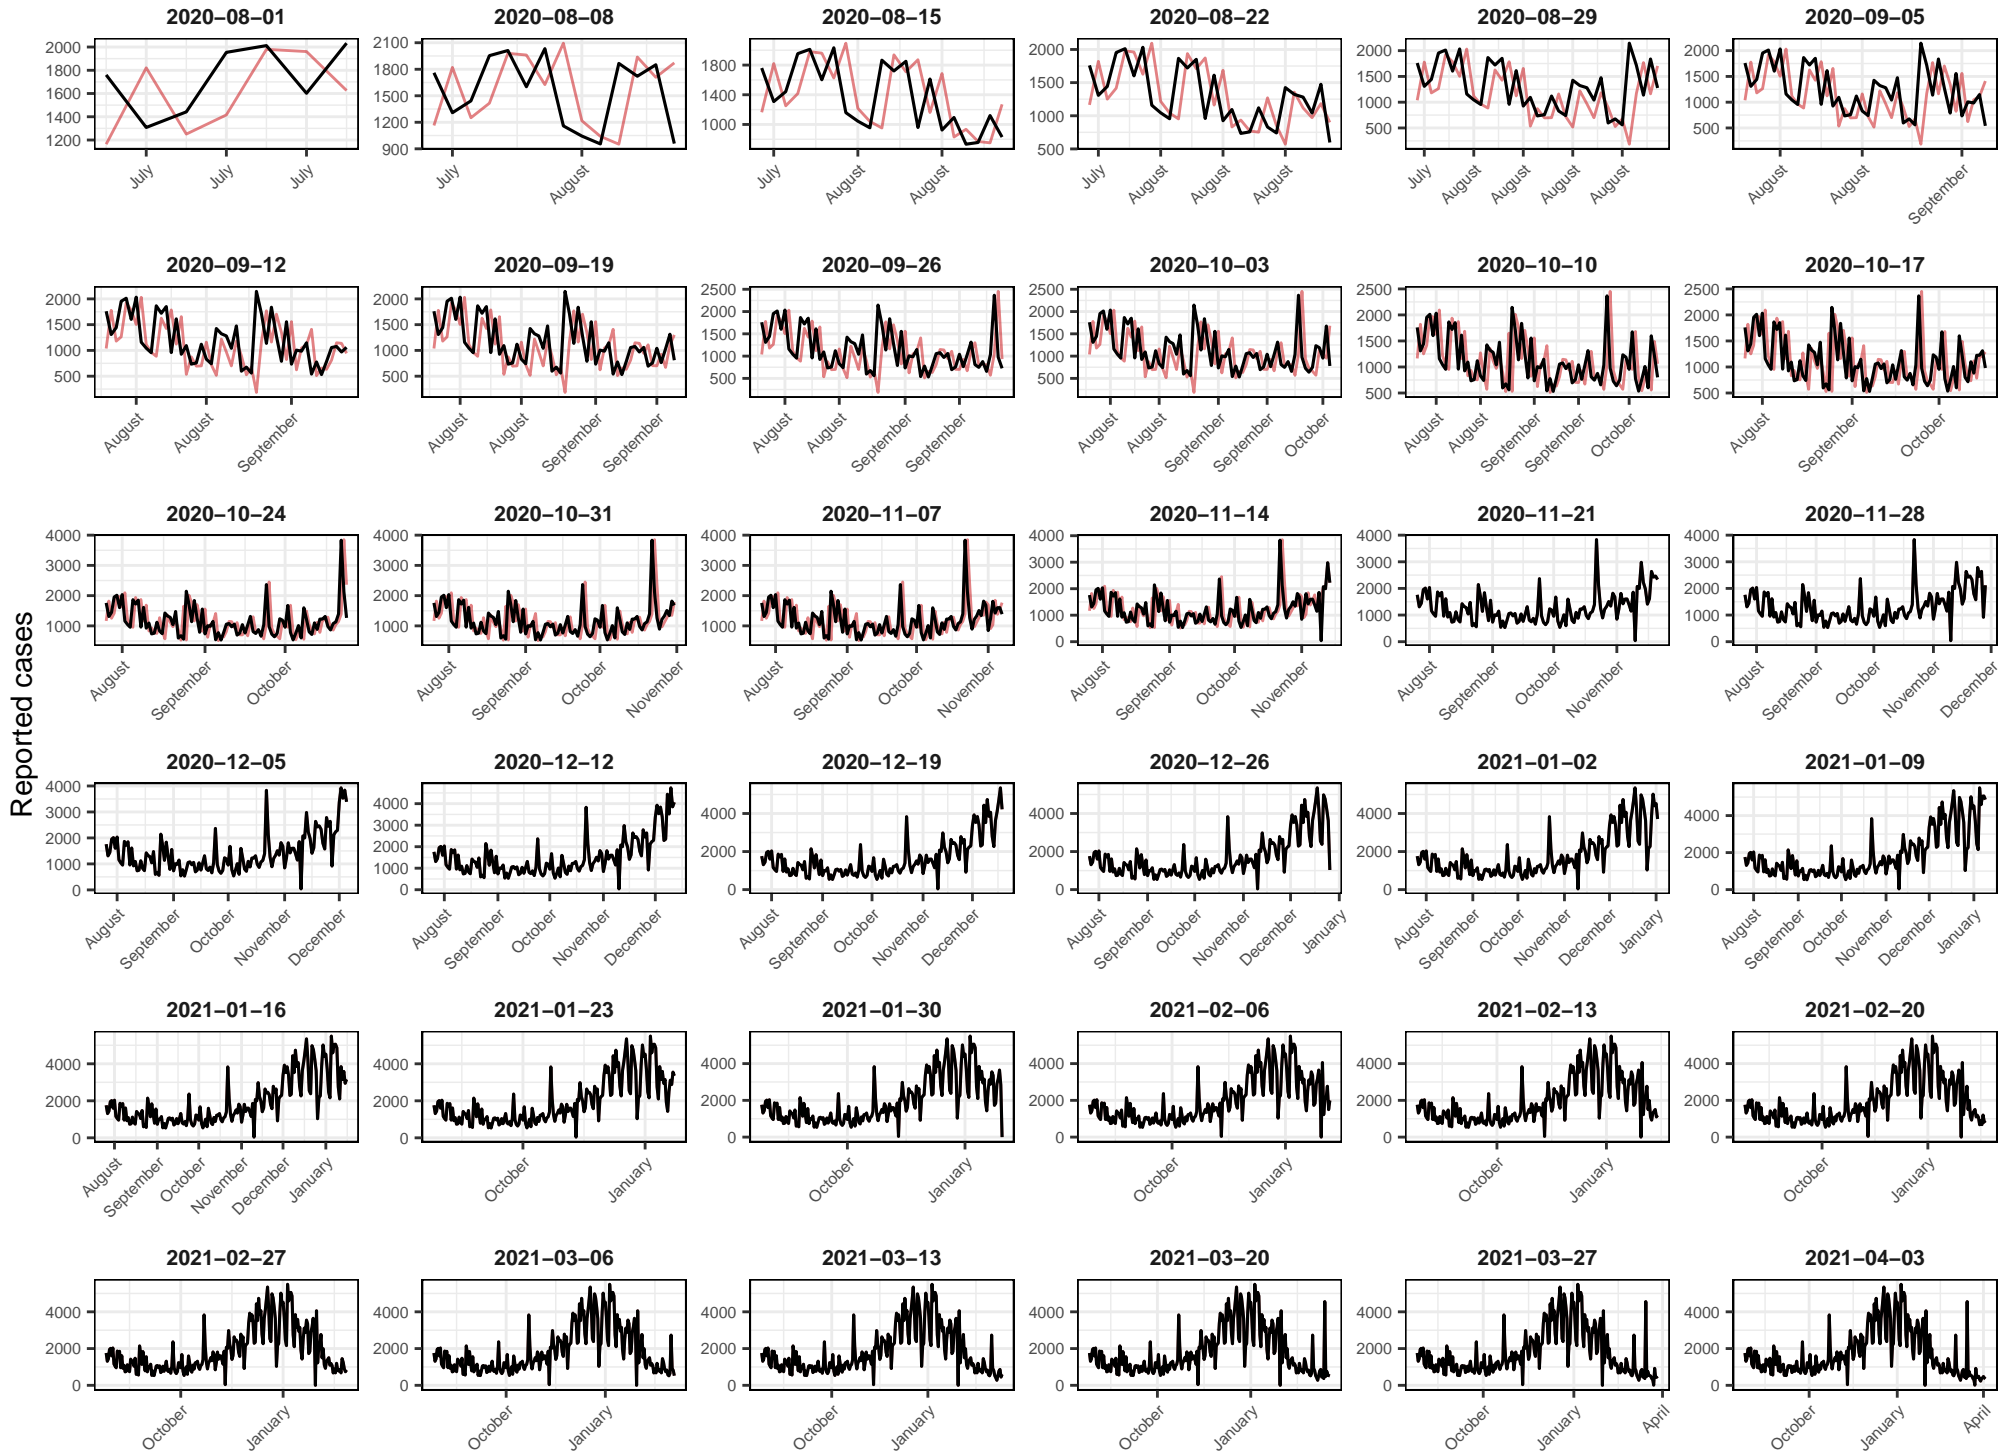

# Alabama

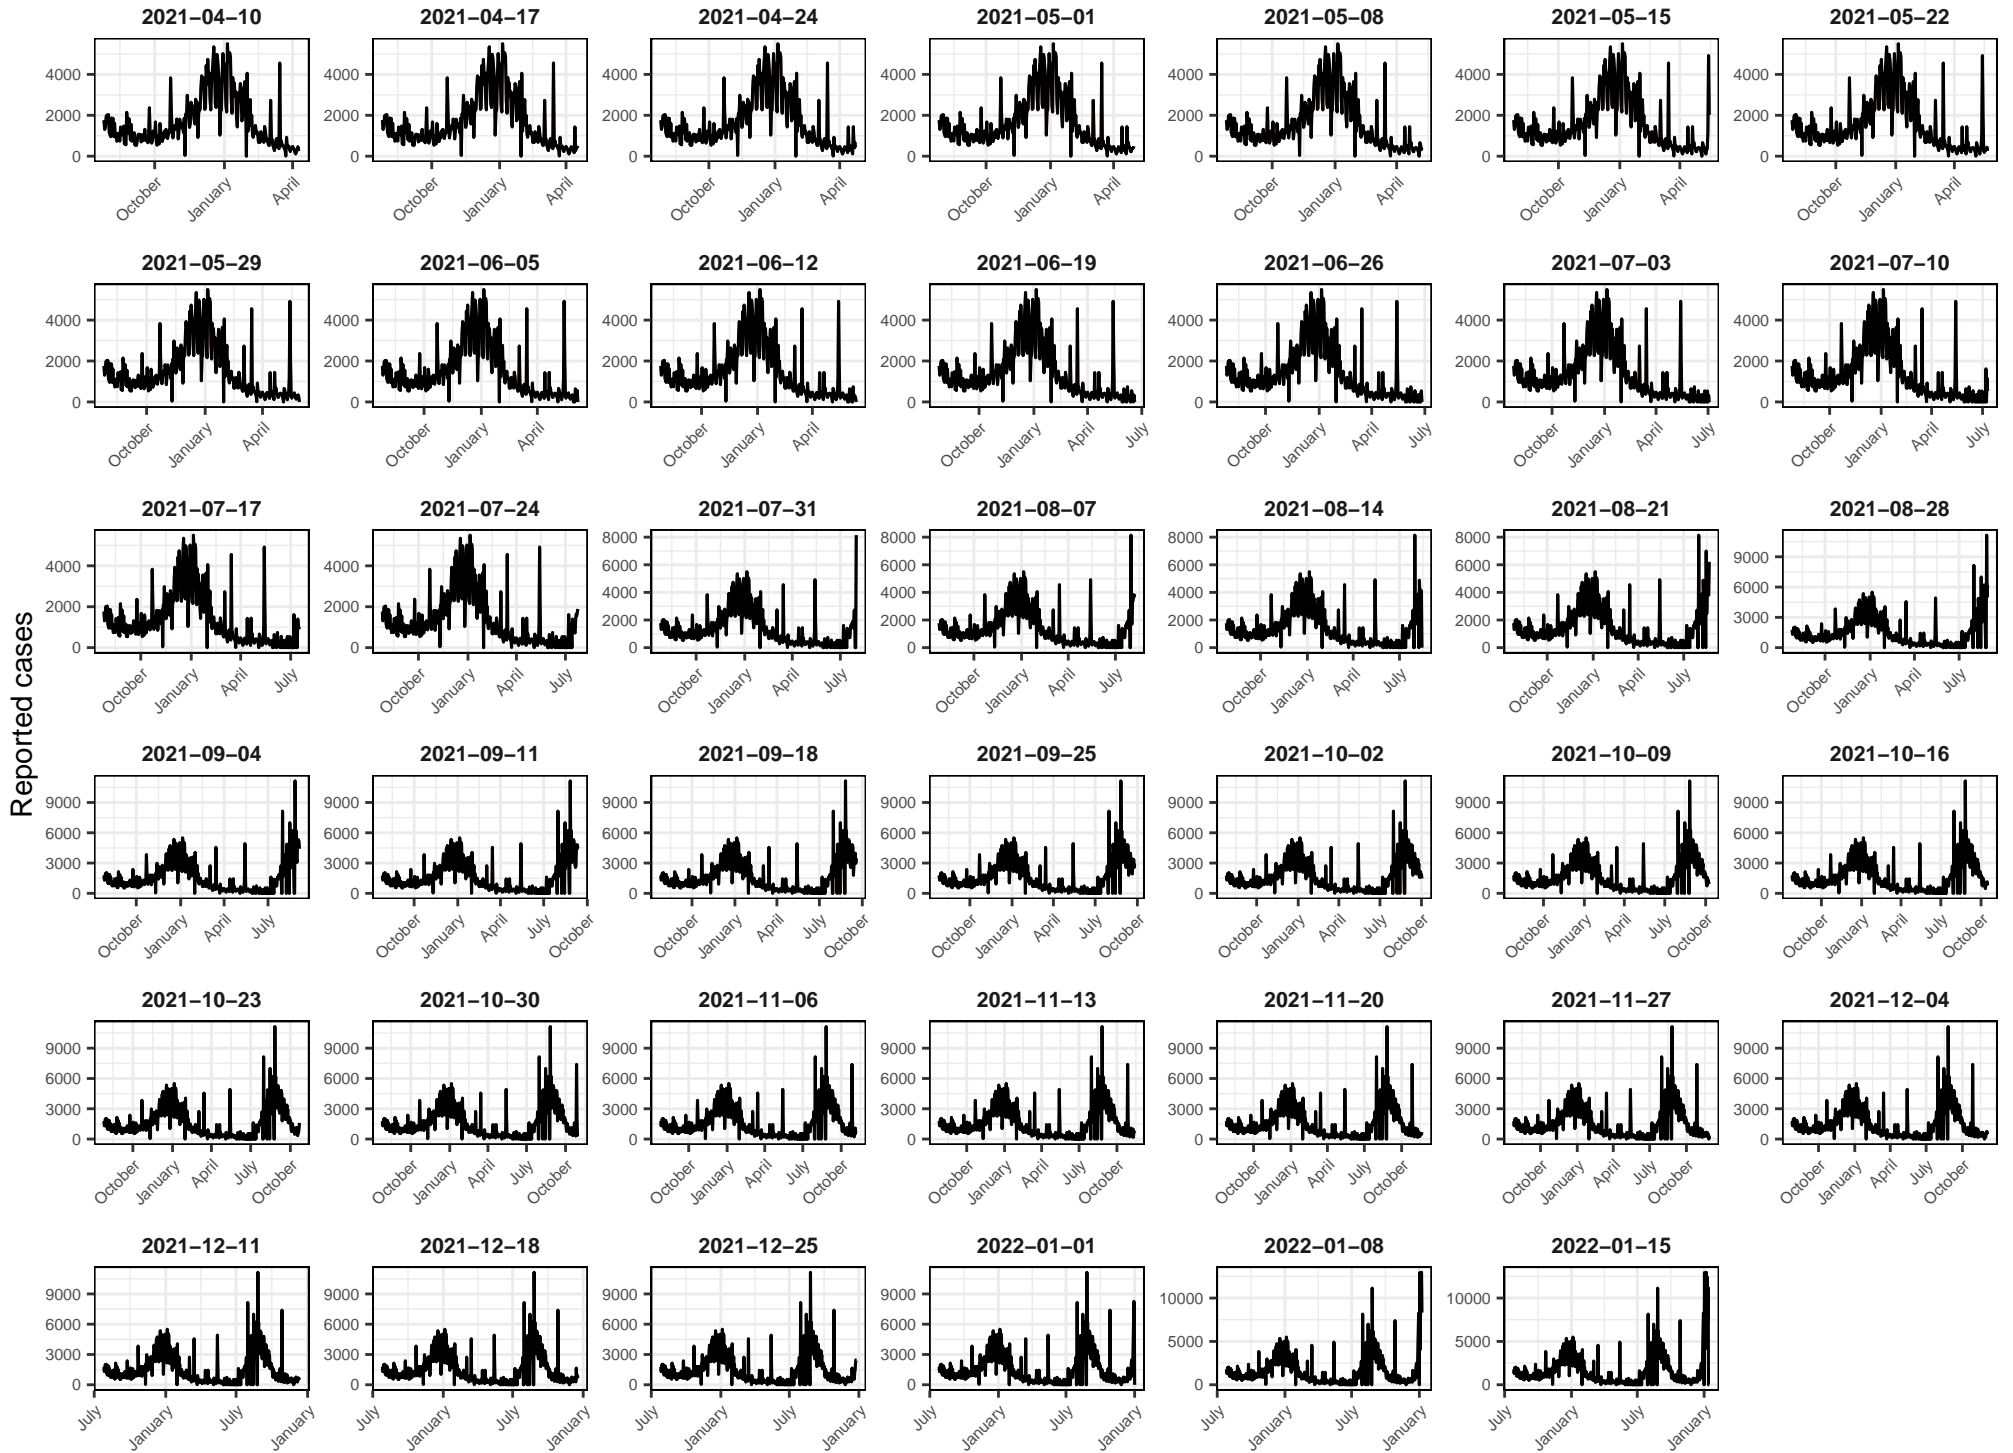

# Alaska

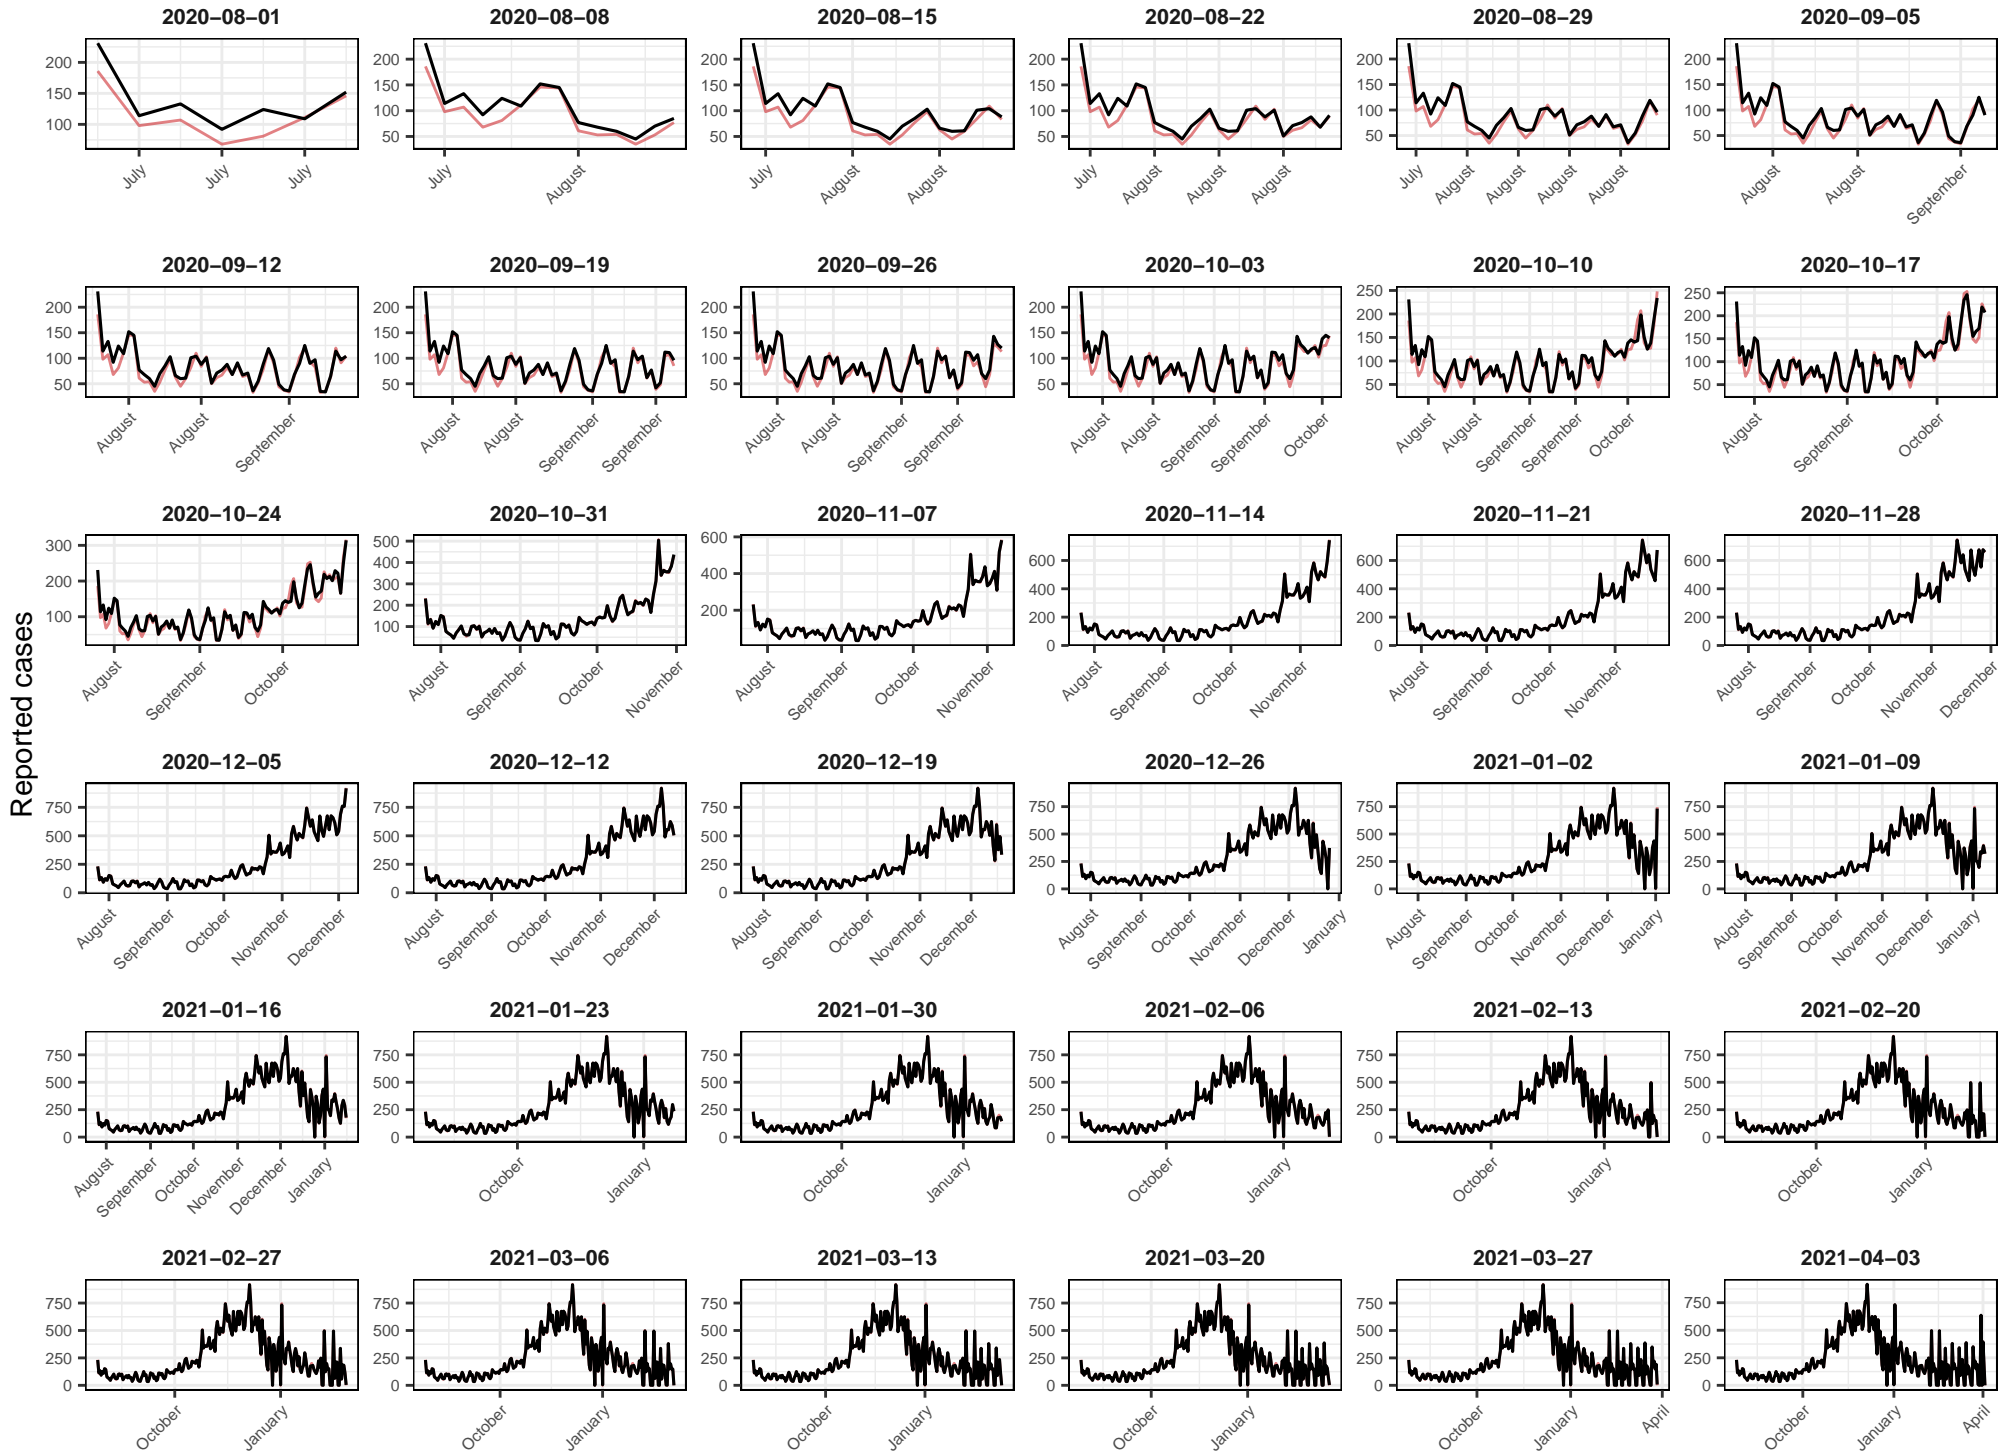

# Alaska

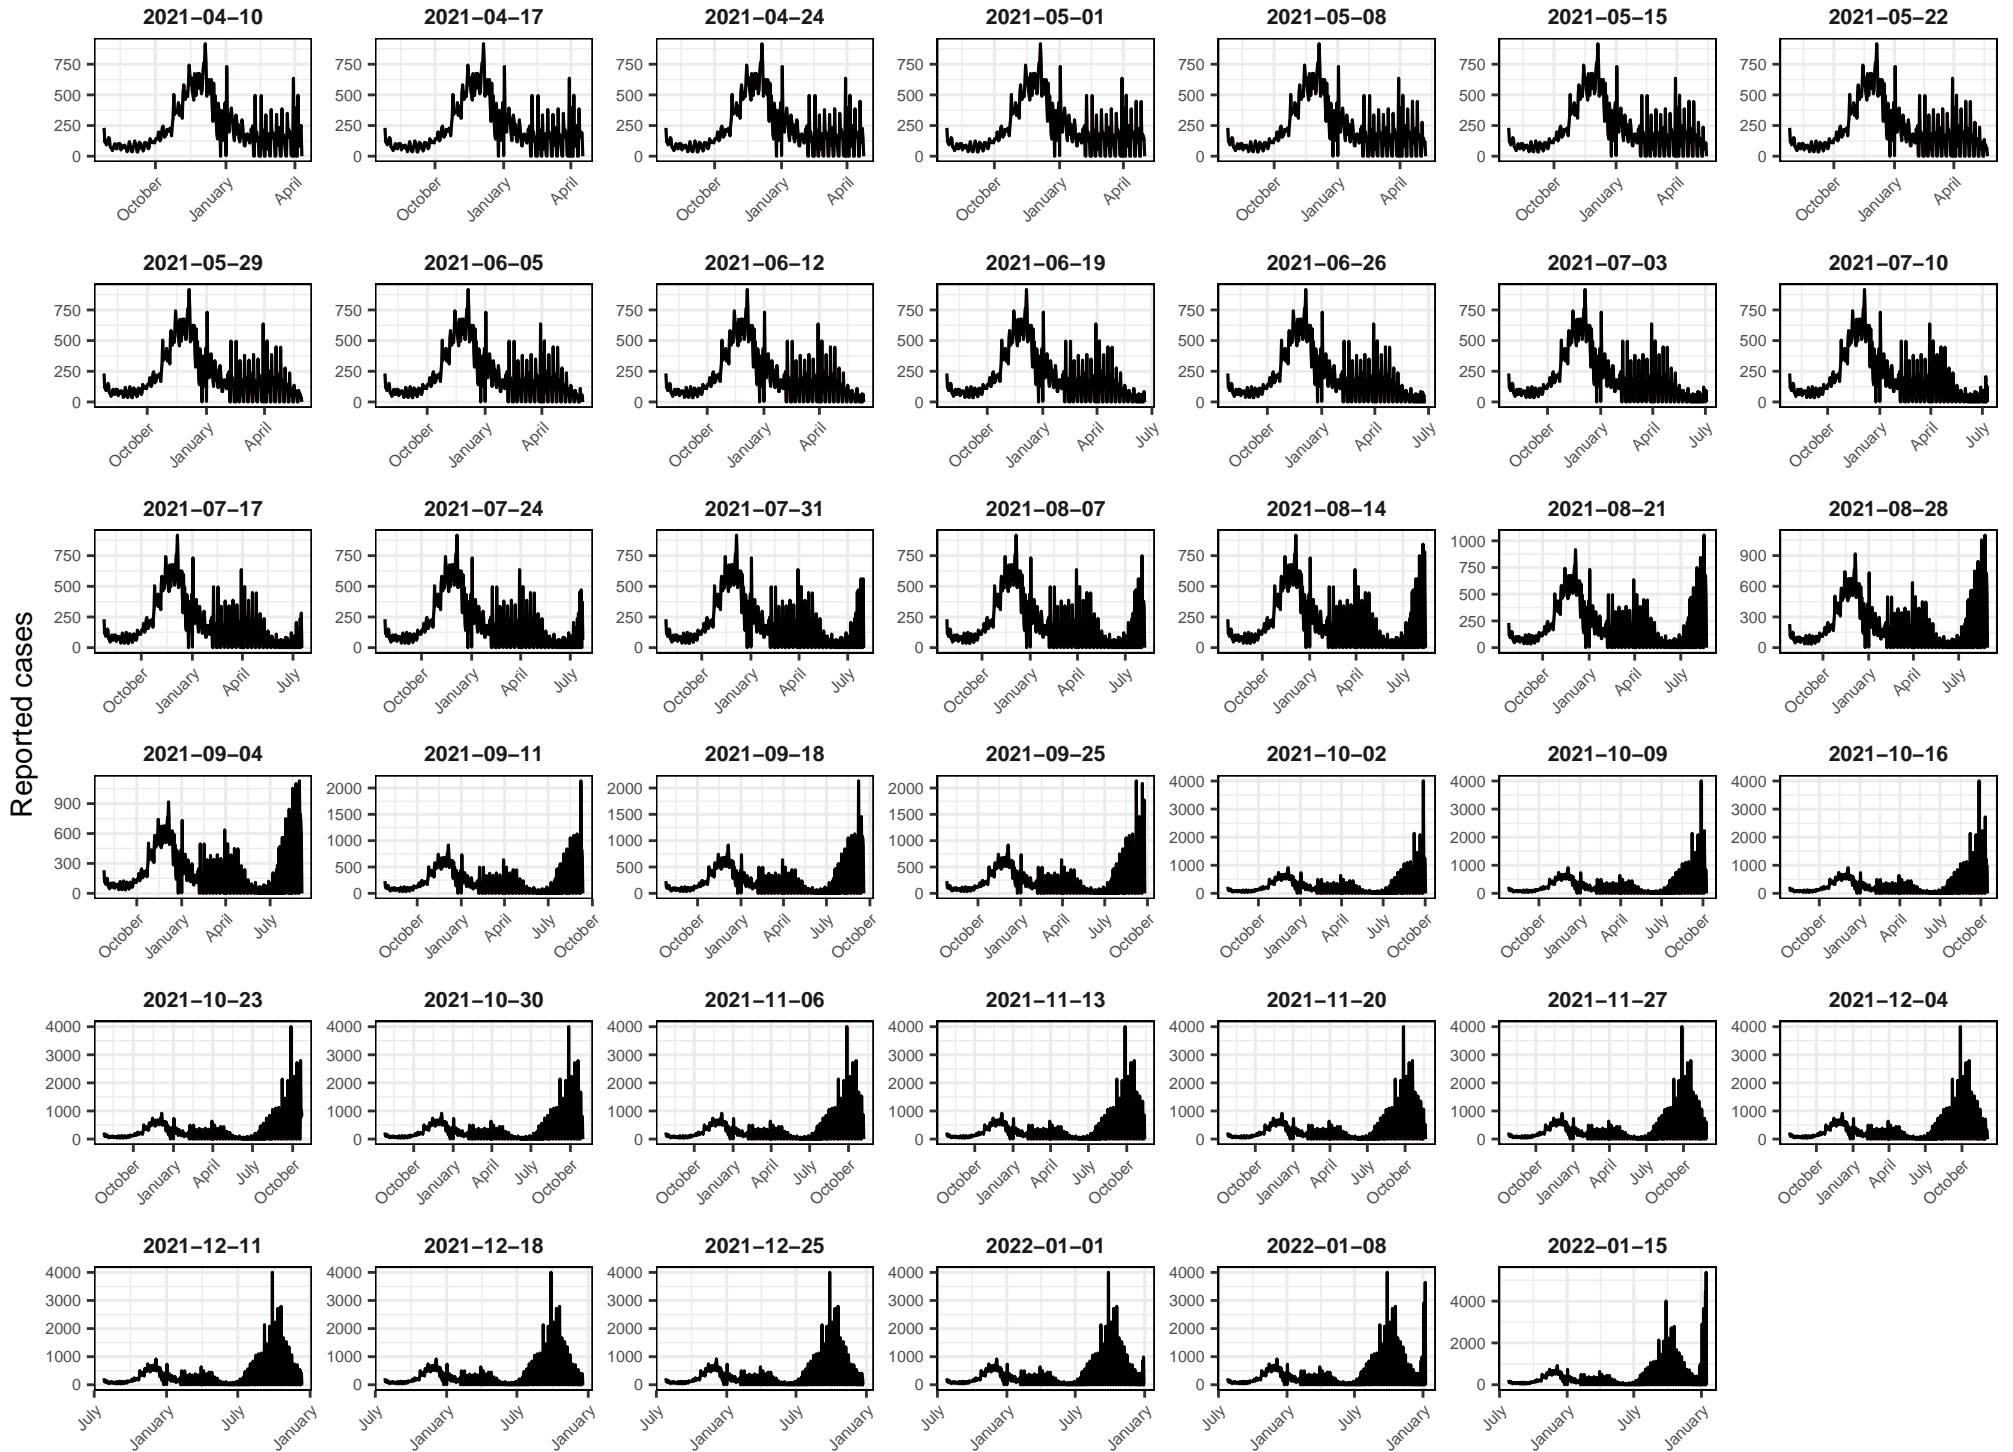

# Arizona

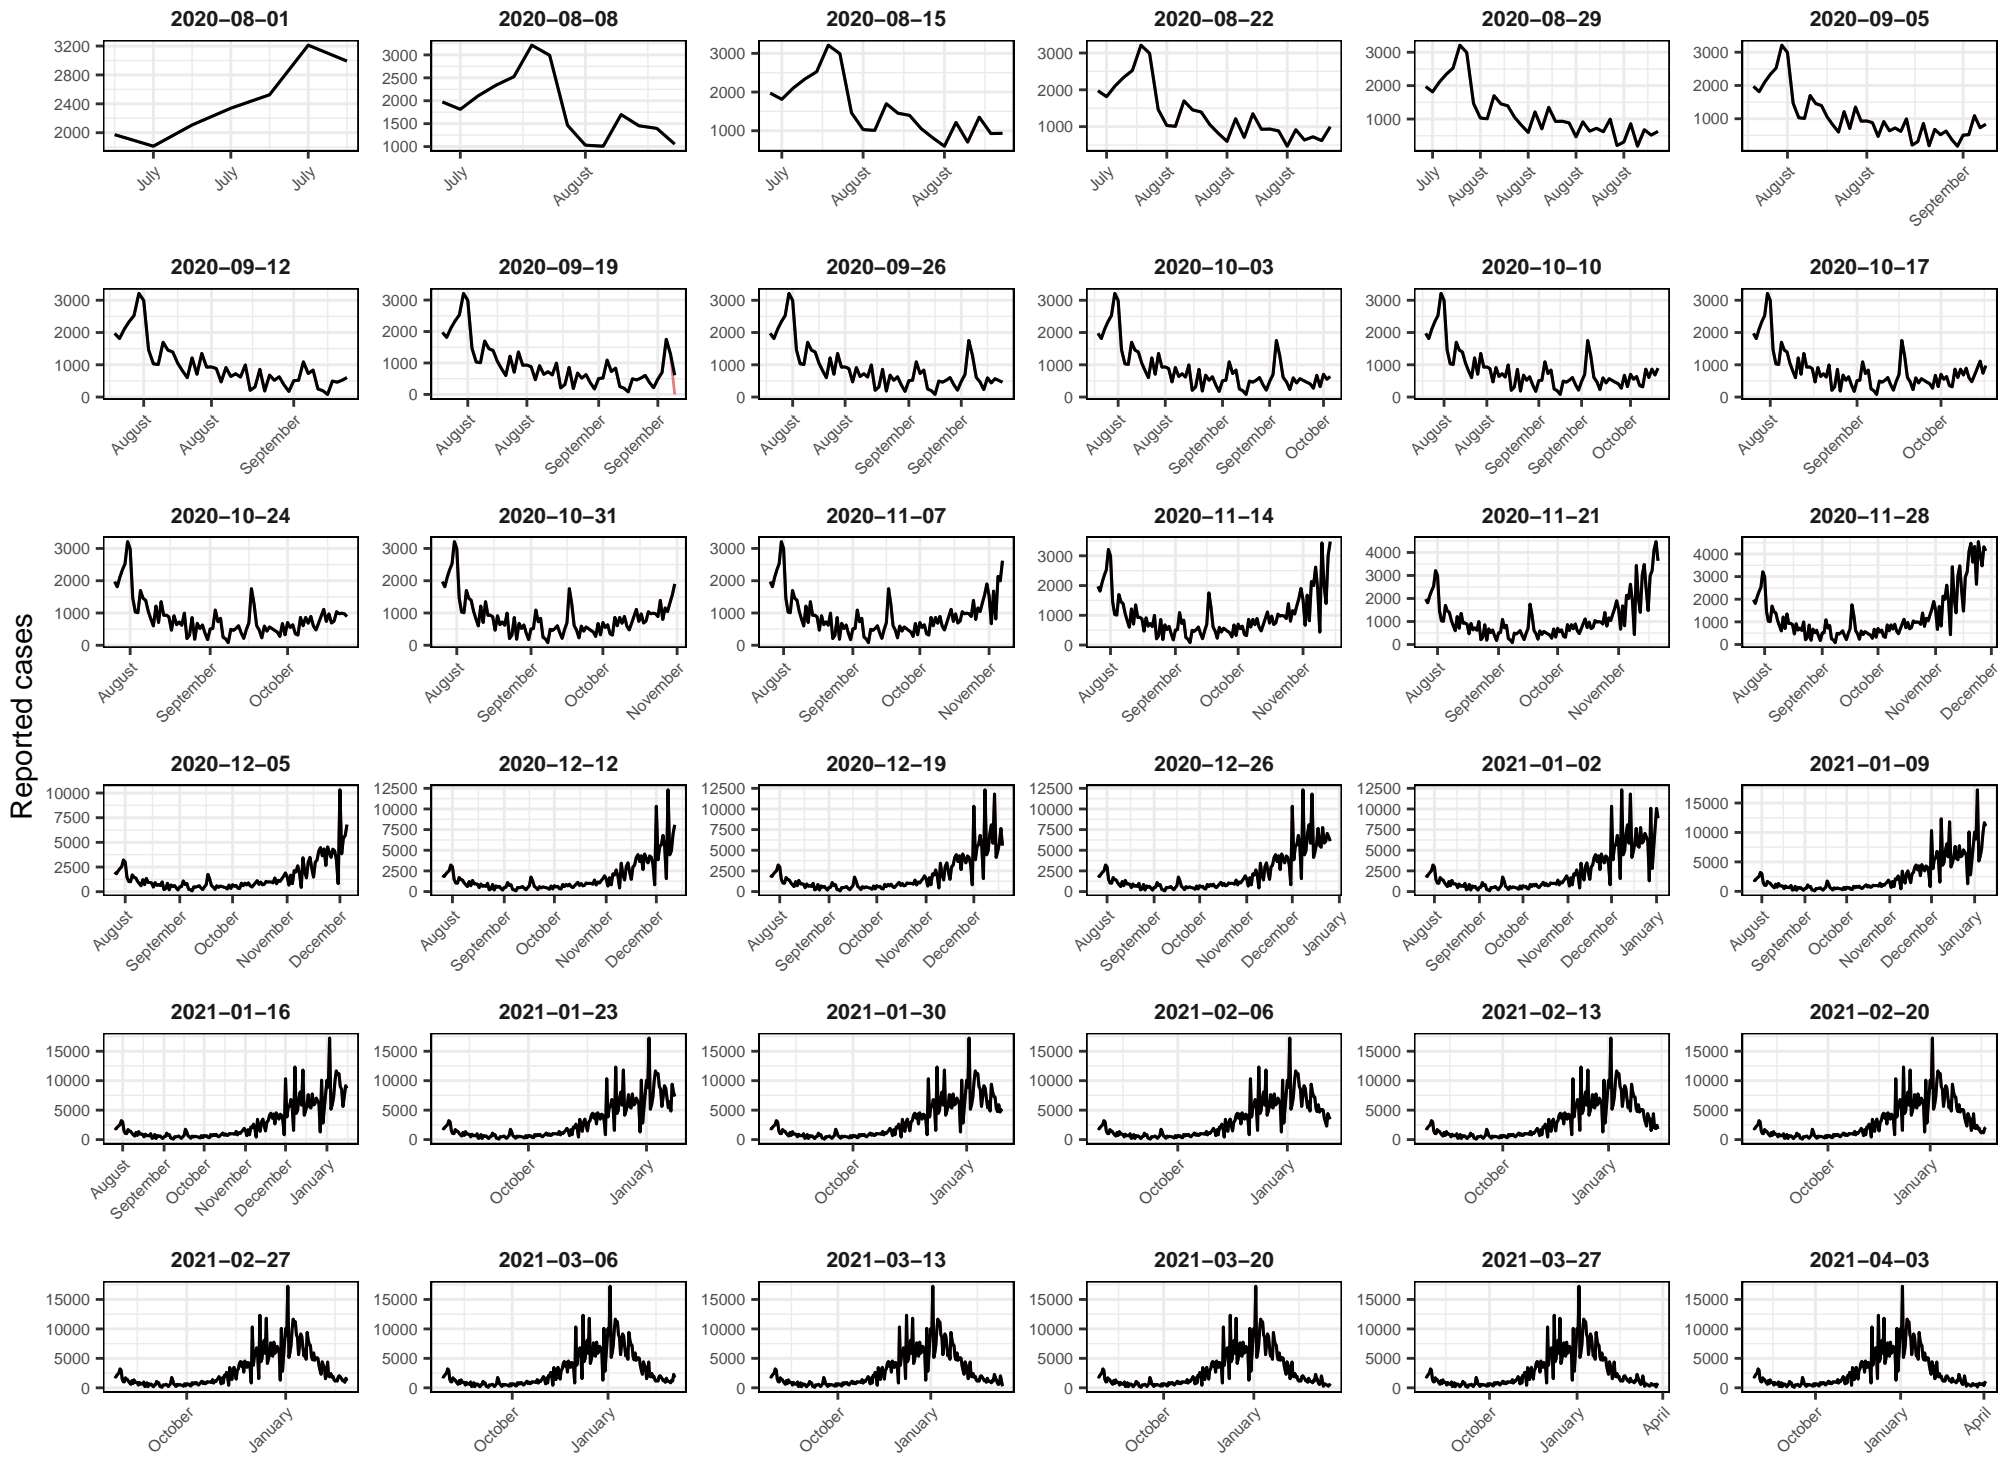

# Arizona

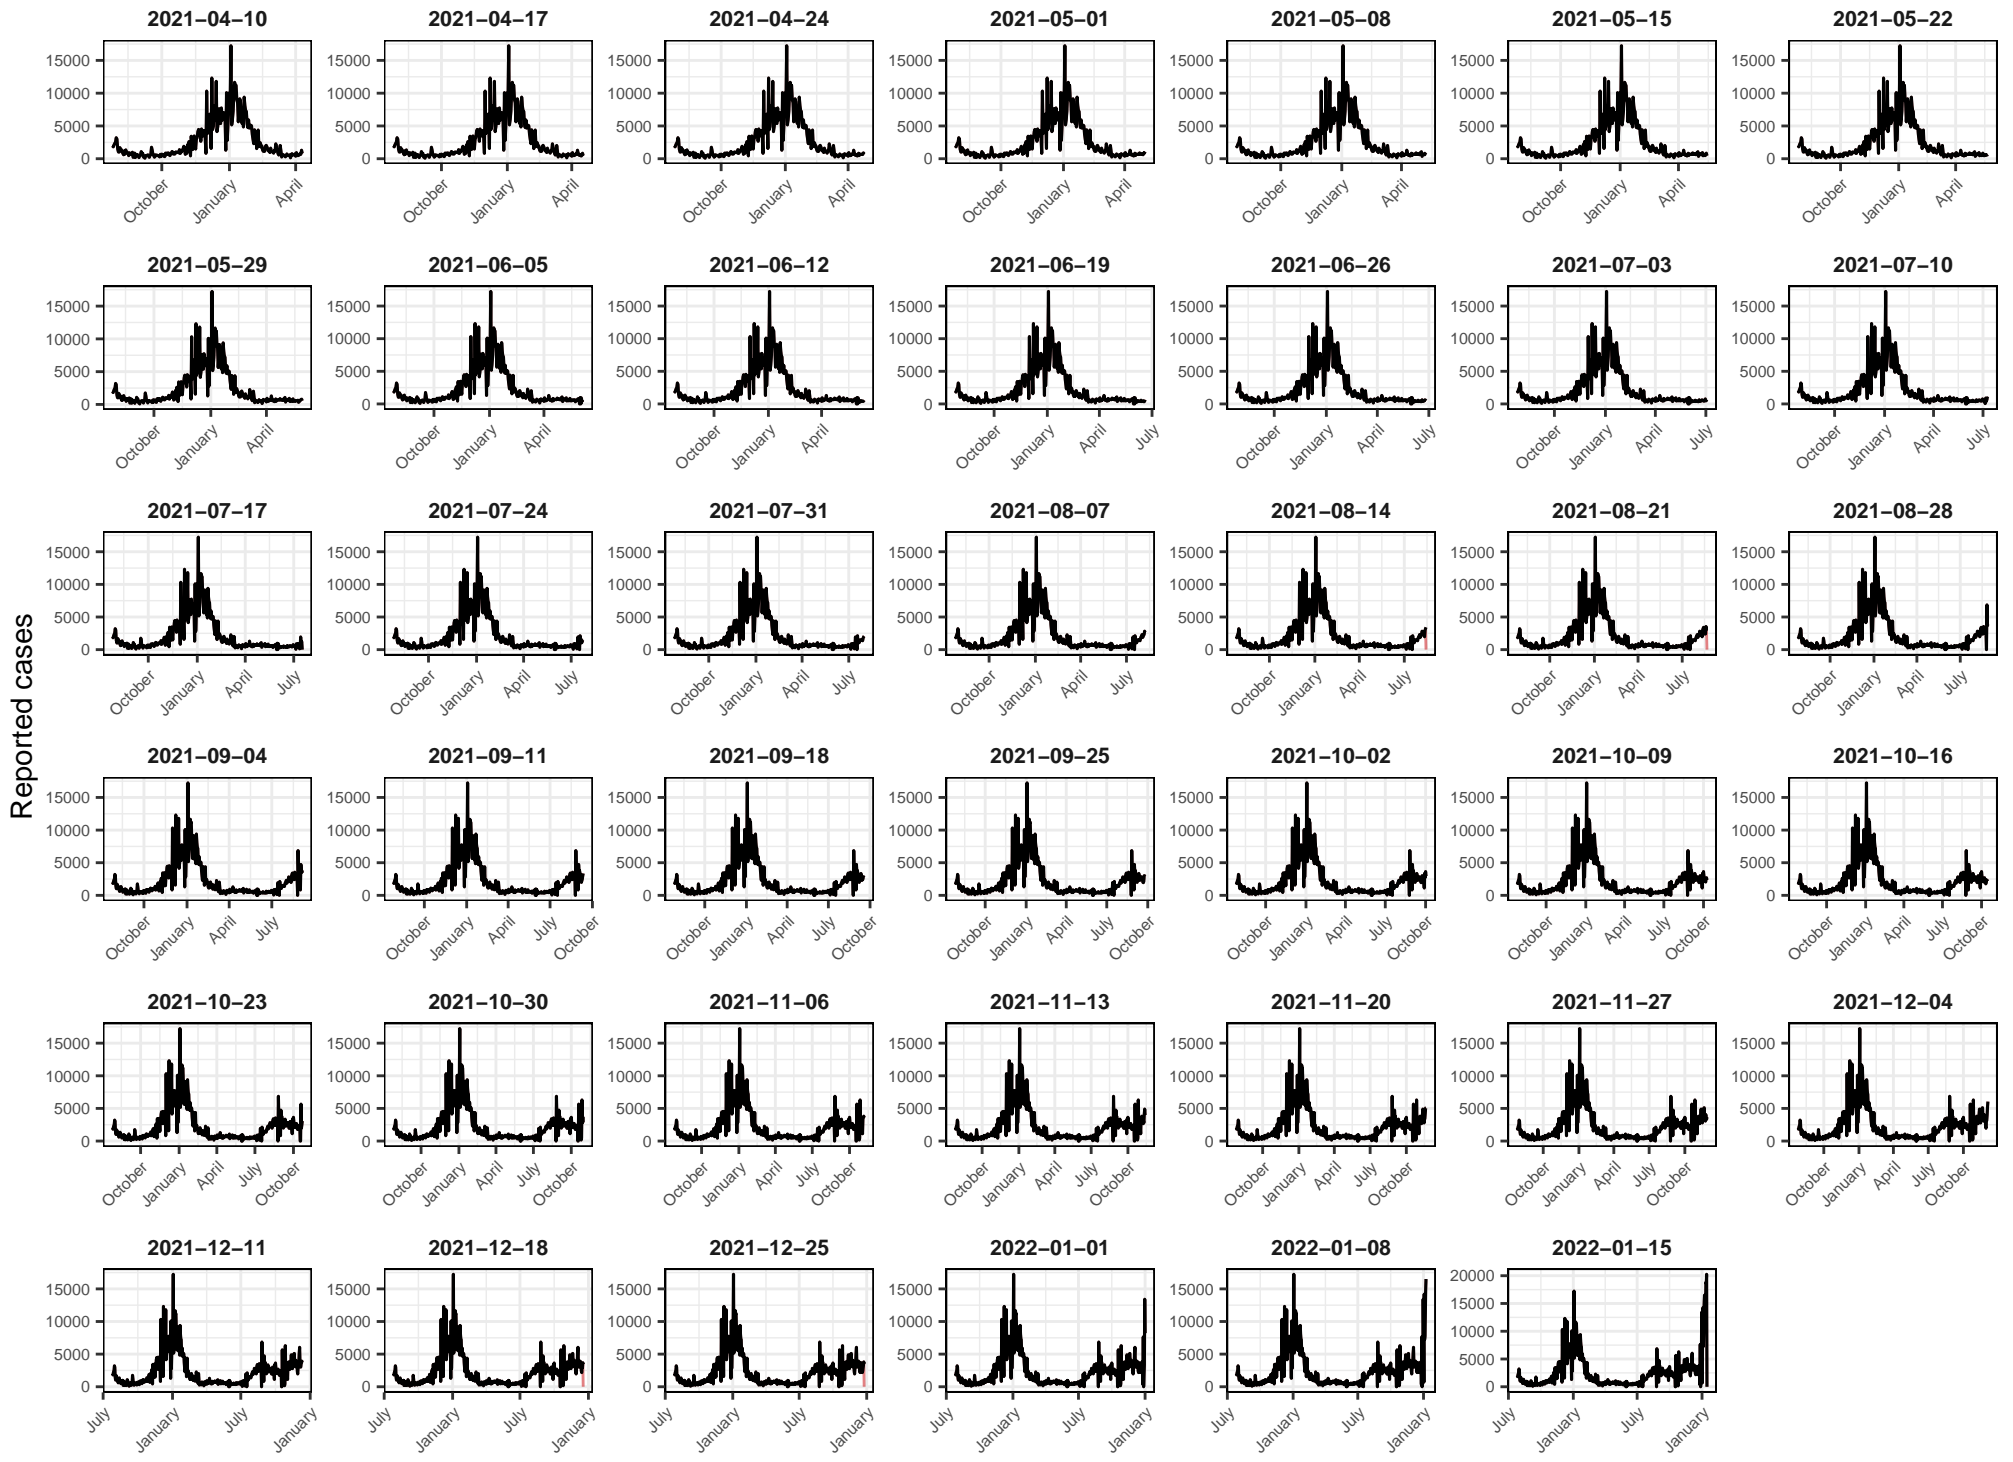

# Arkansas

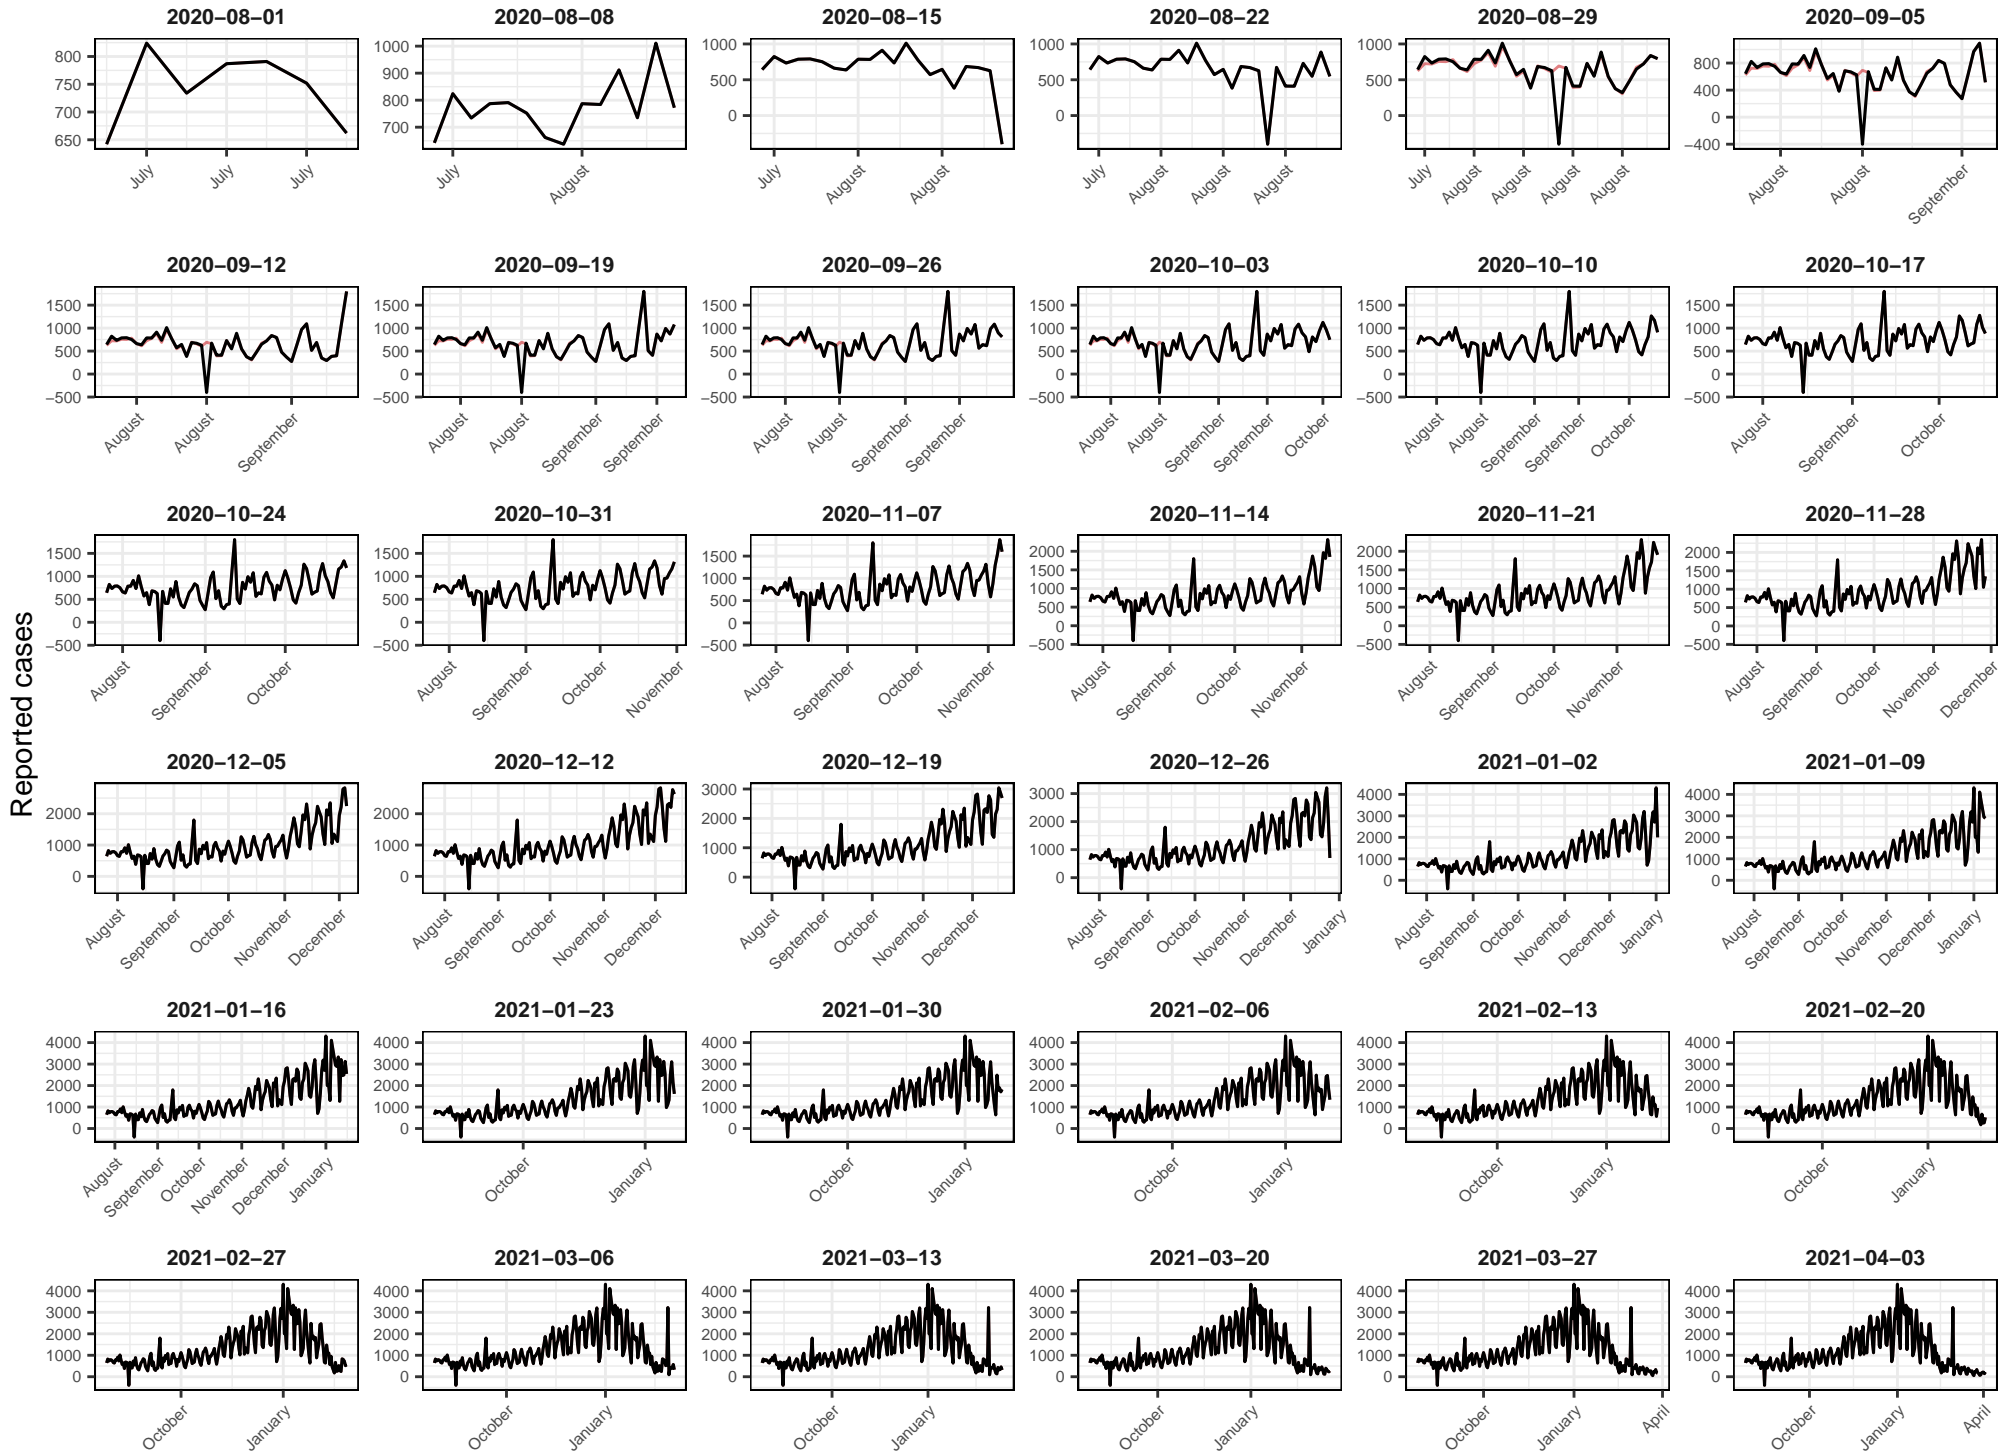

# Arkansas

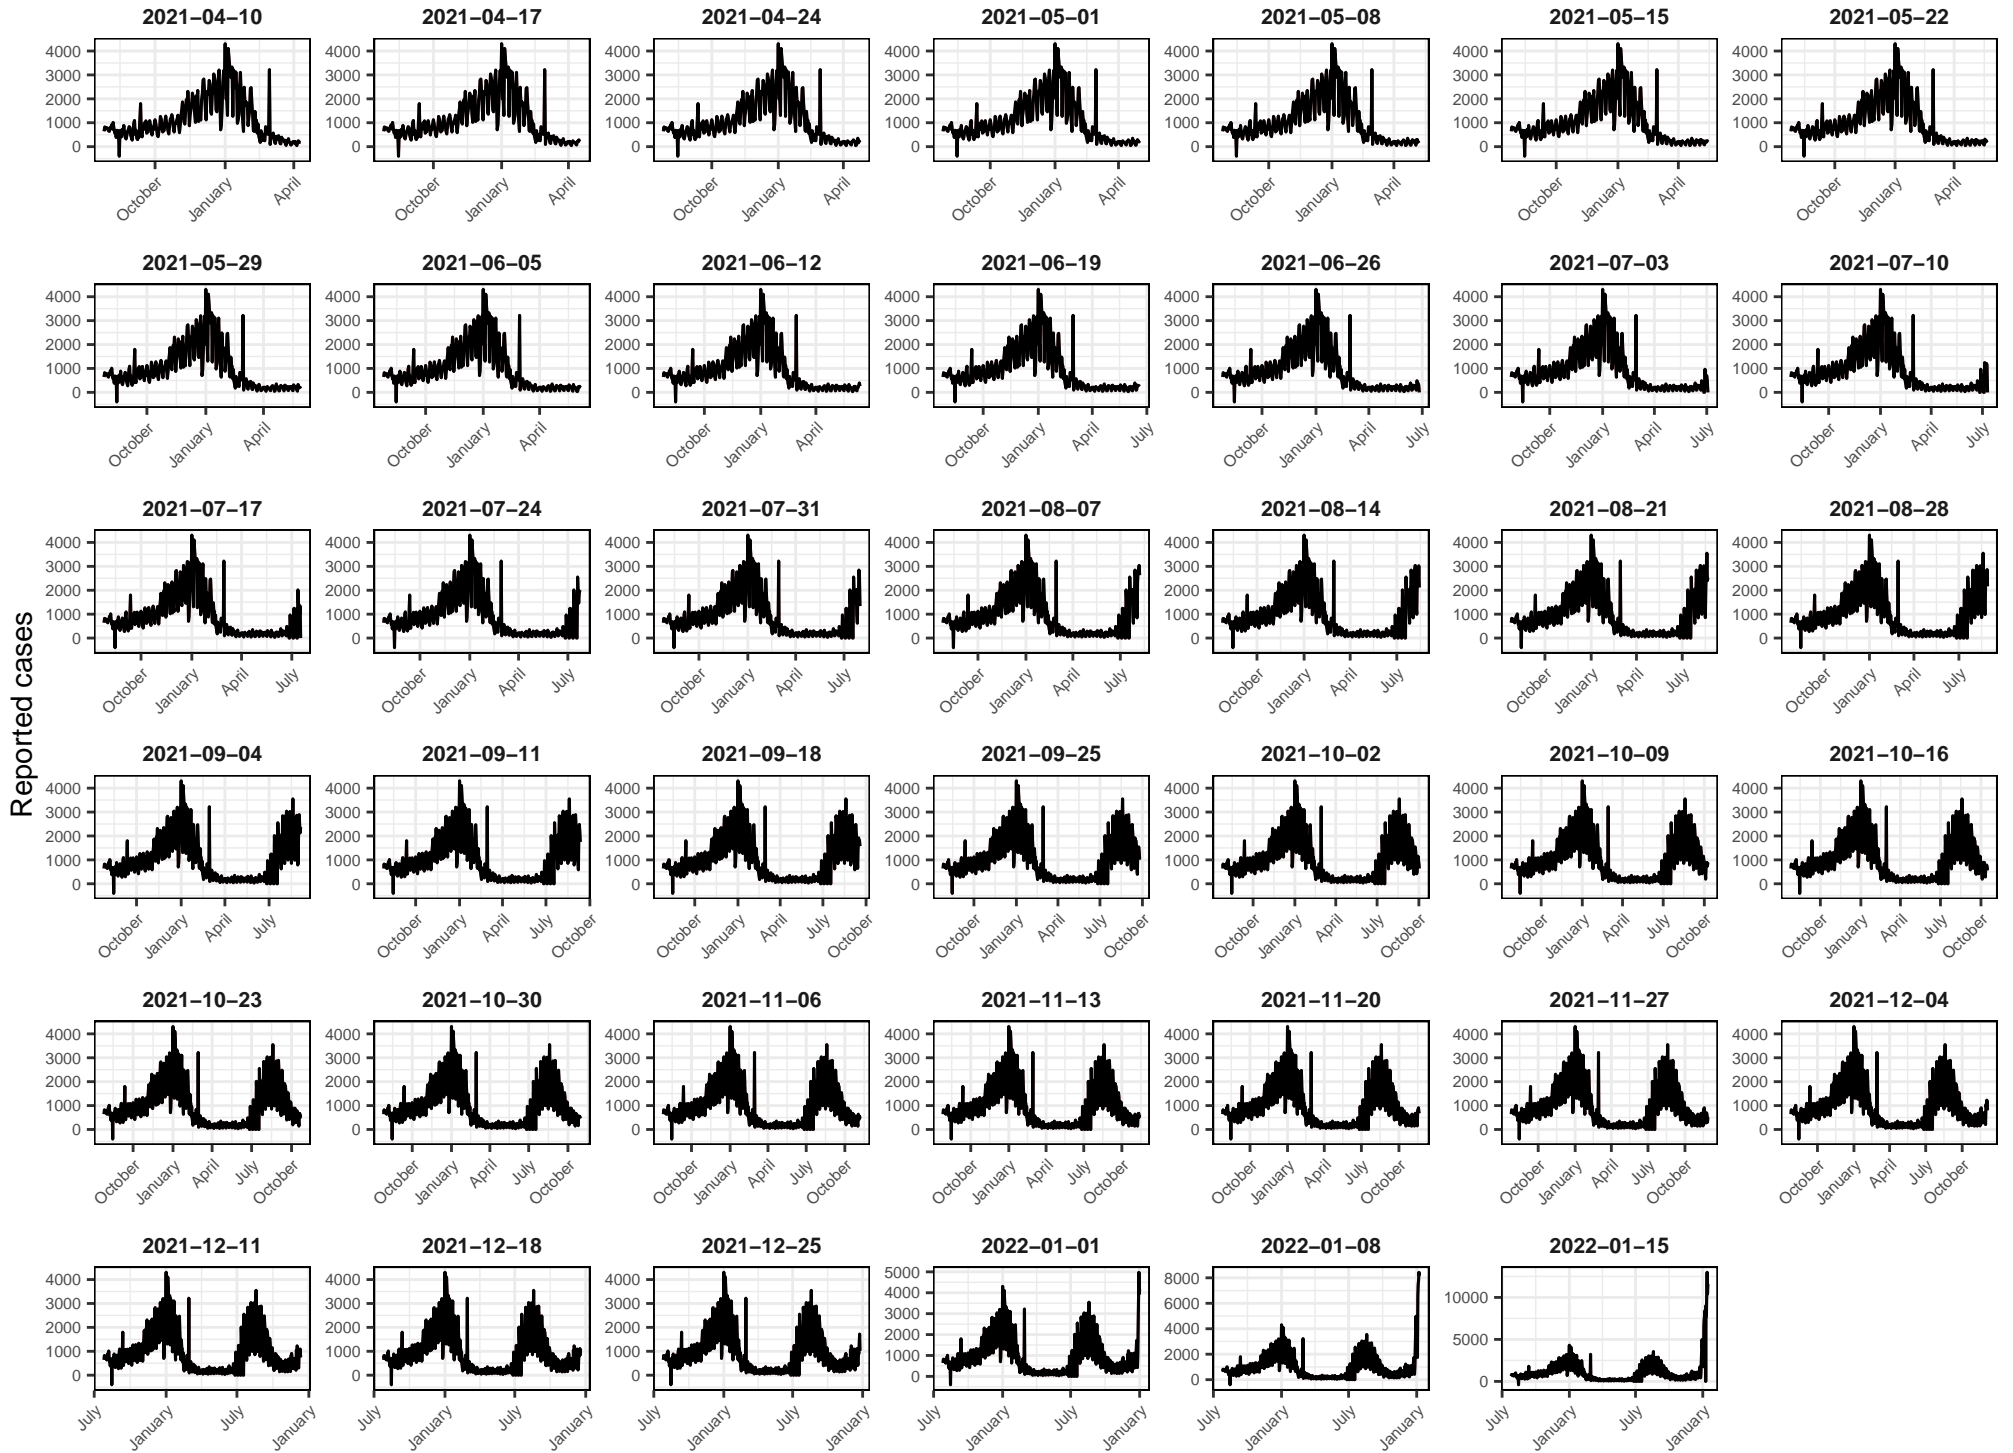



# California

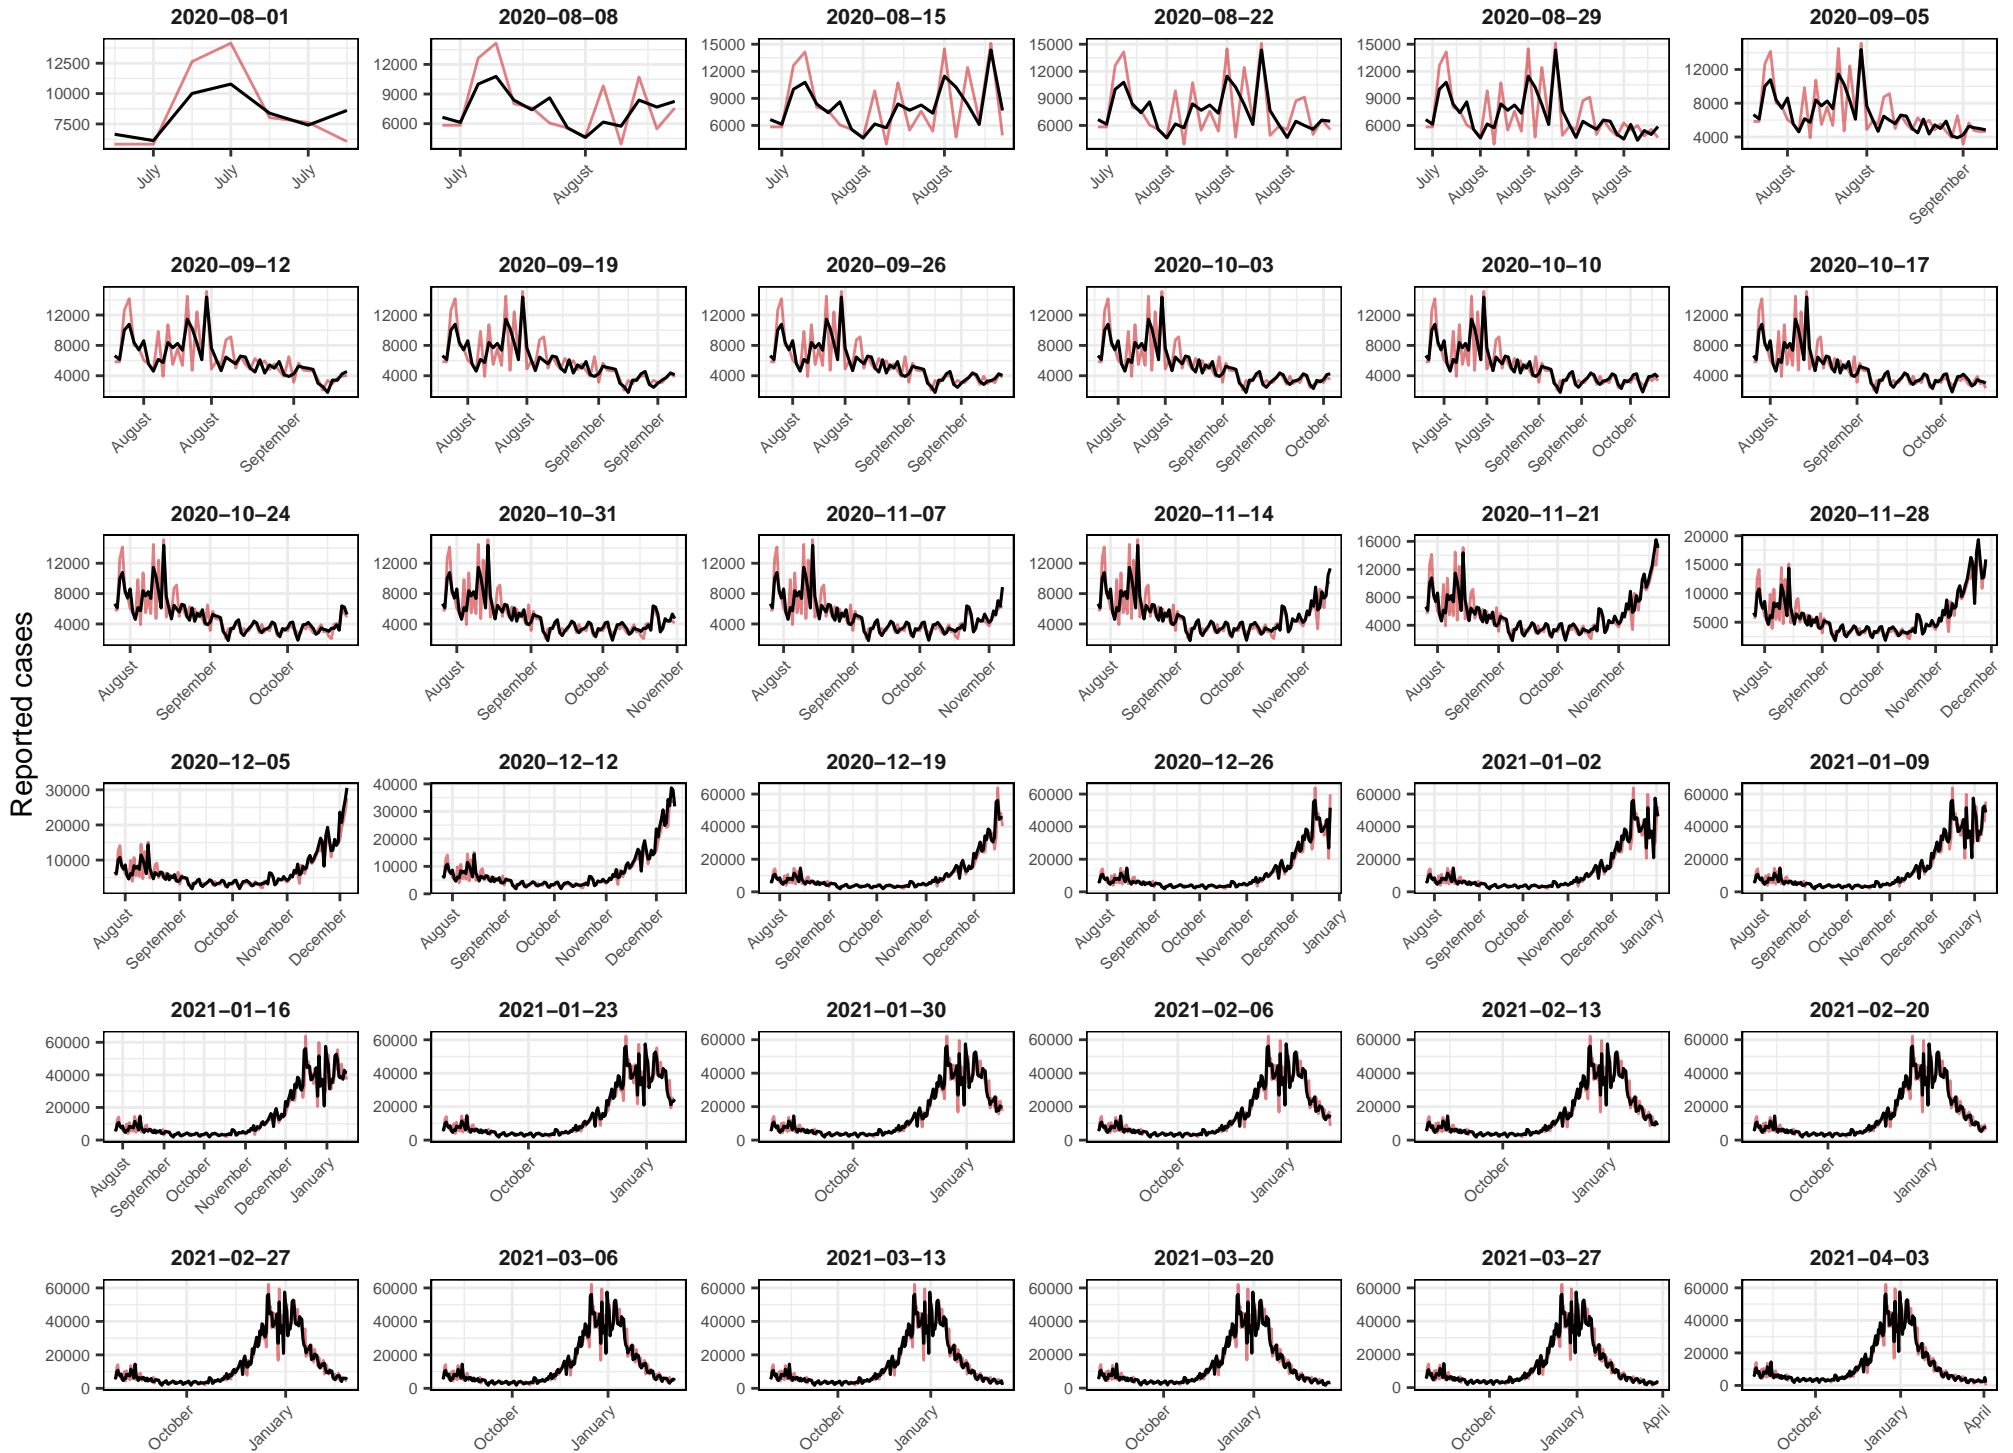

# California

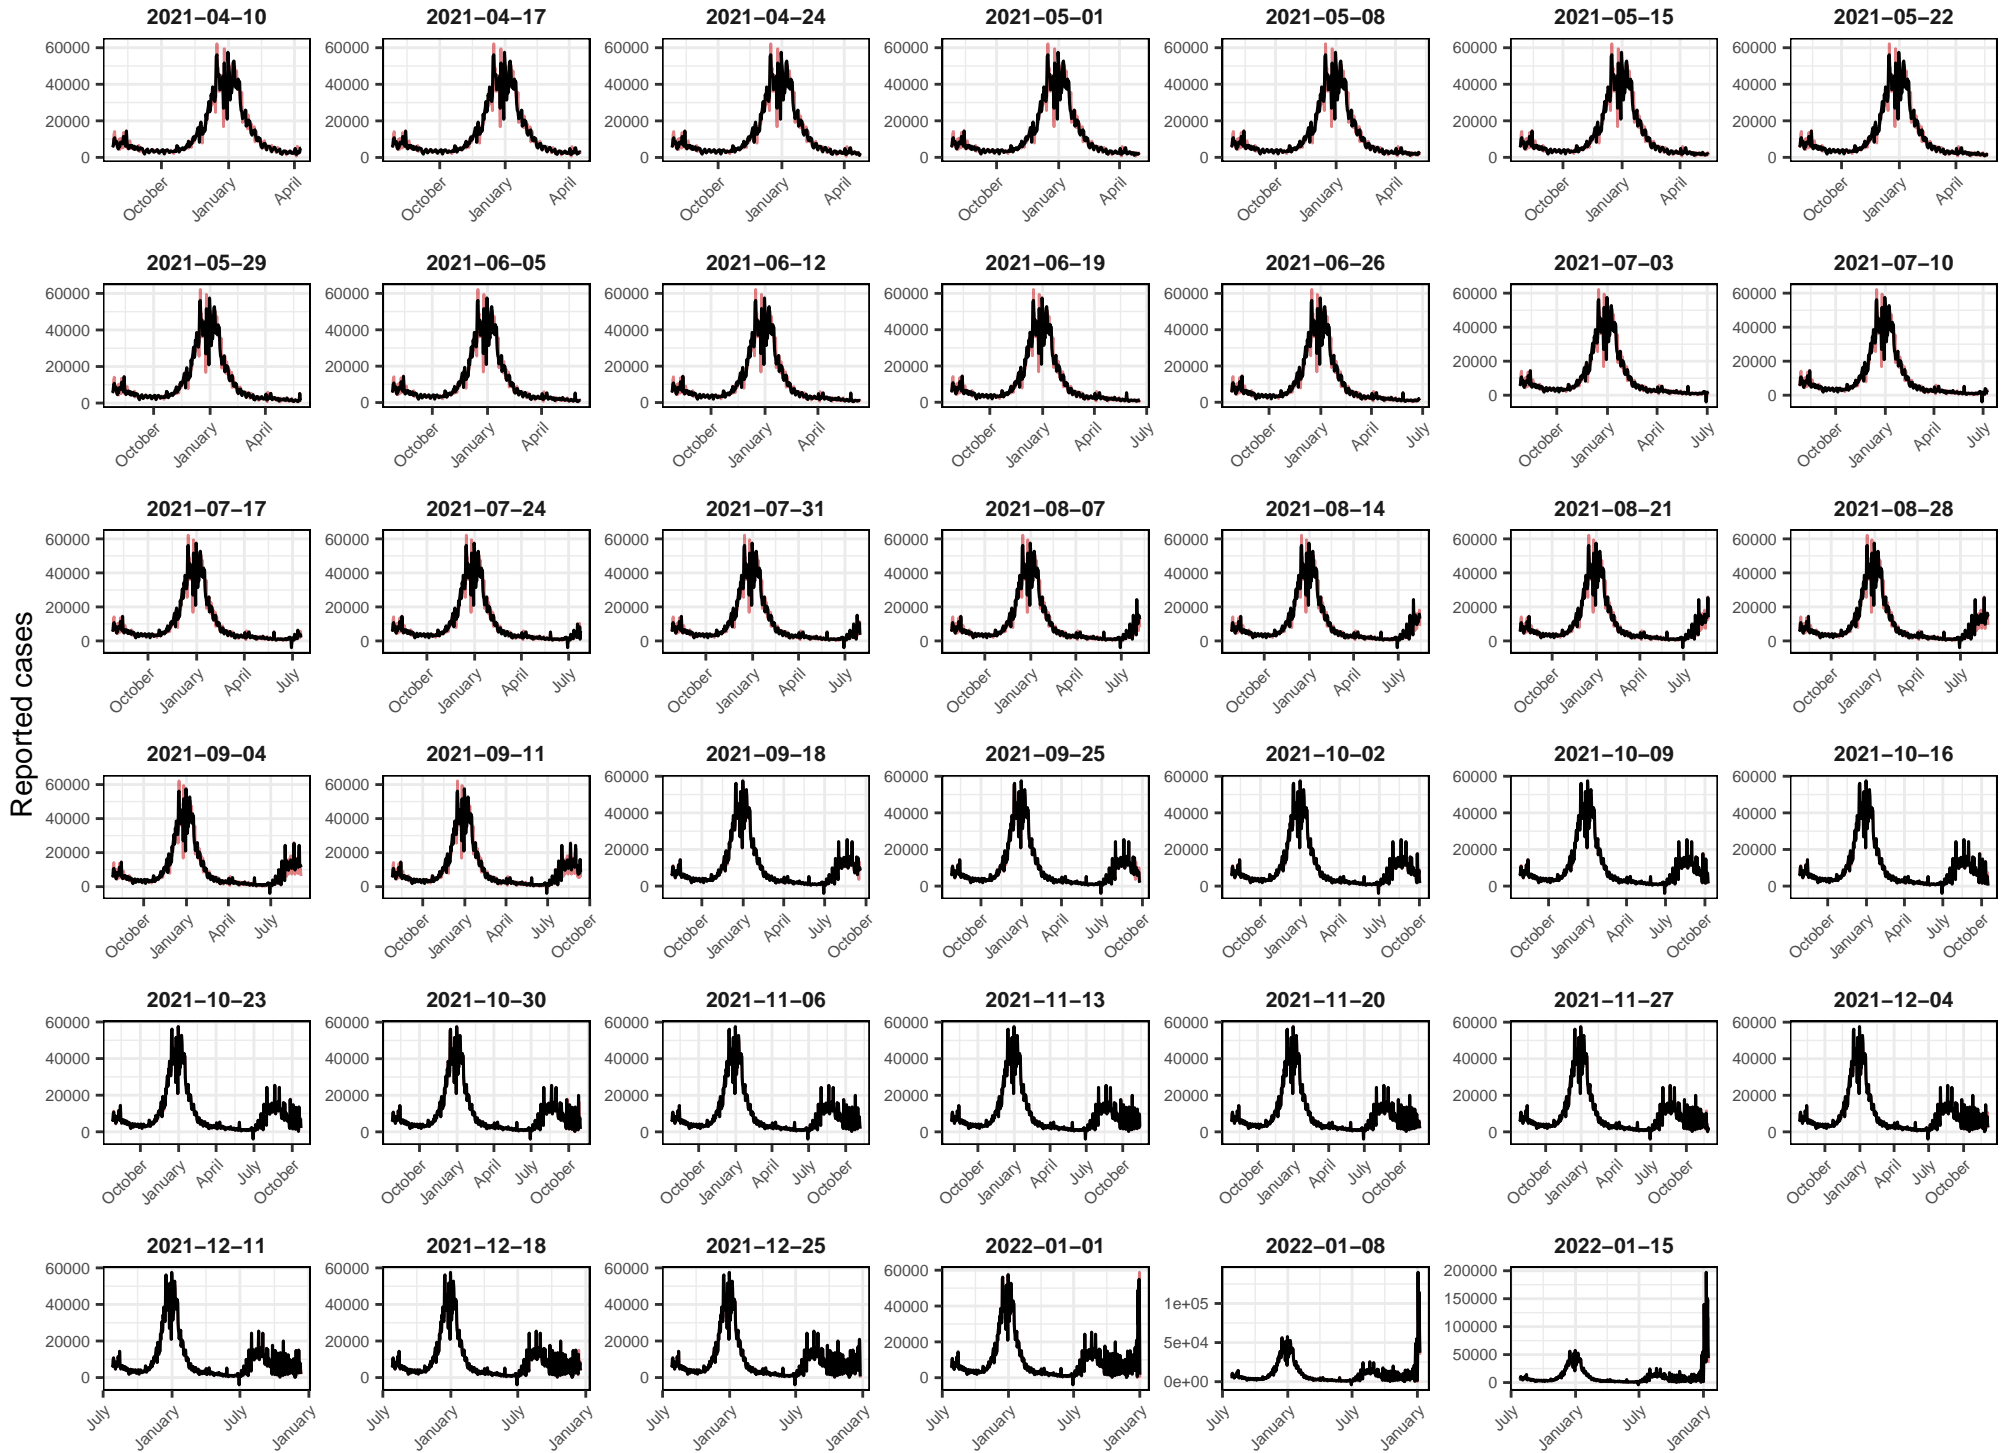

# Colorado

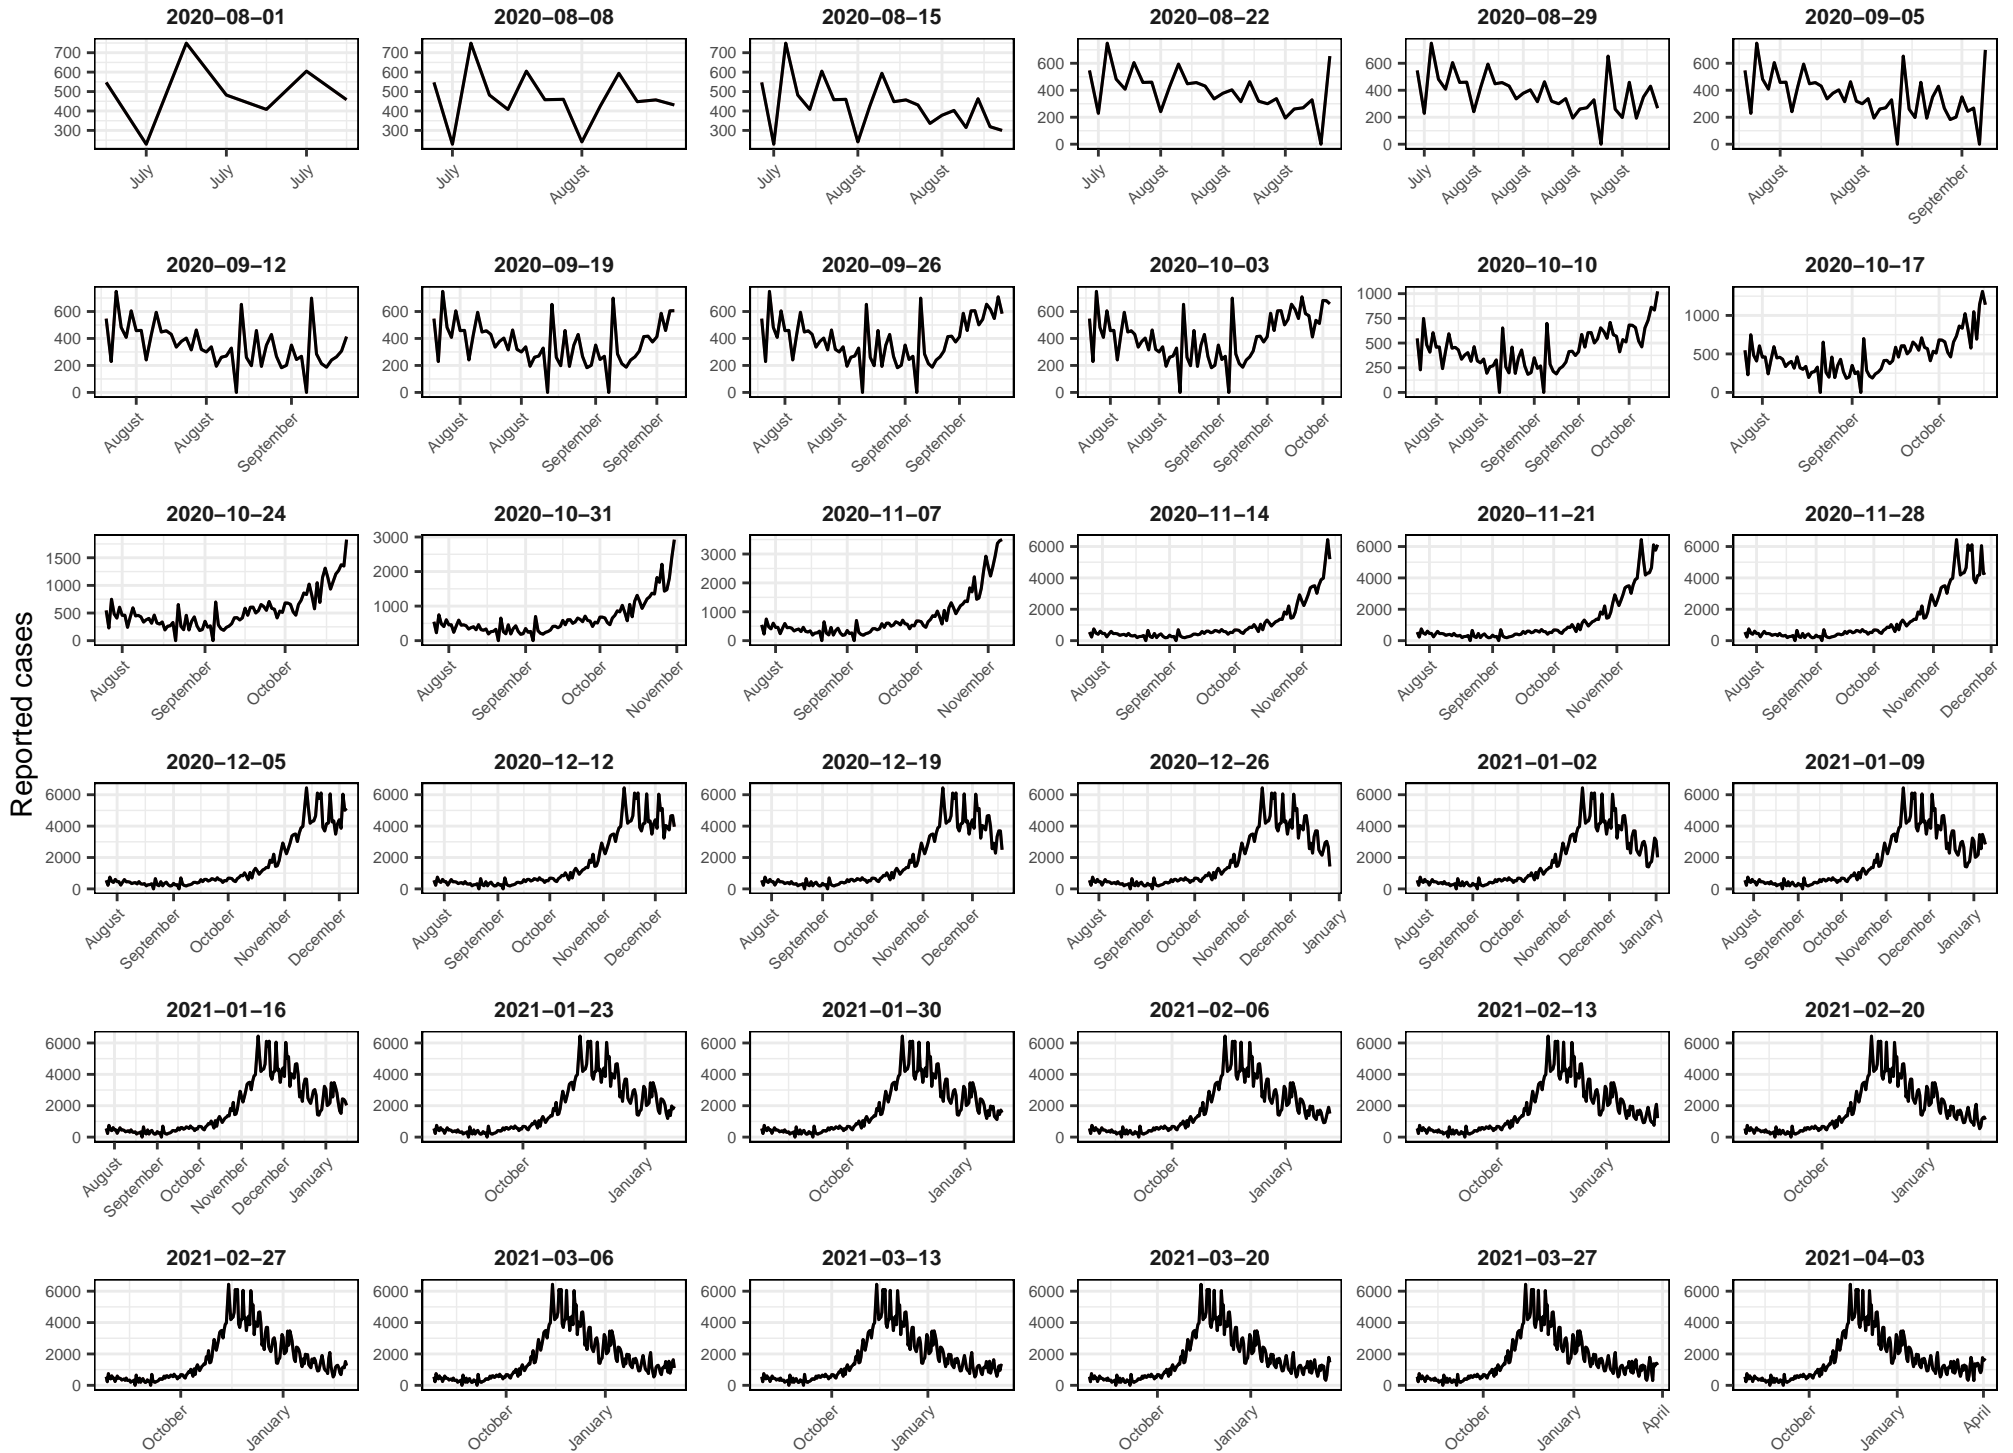

# Colorado

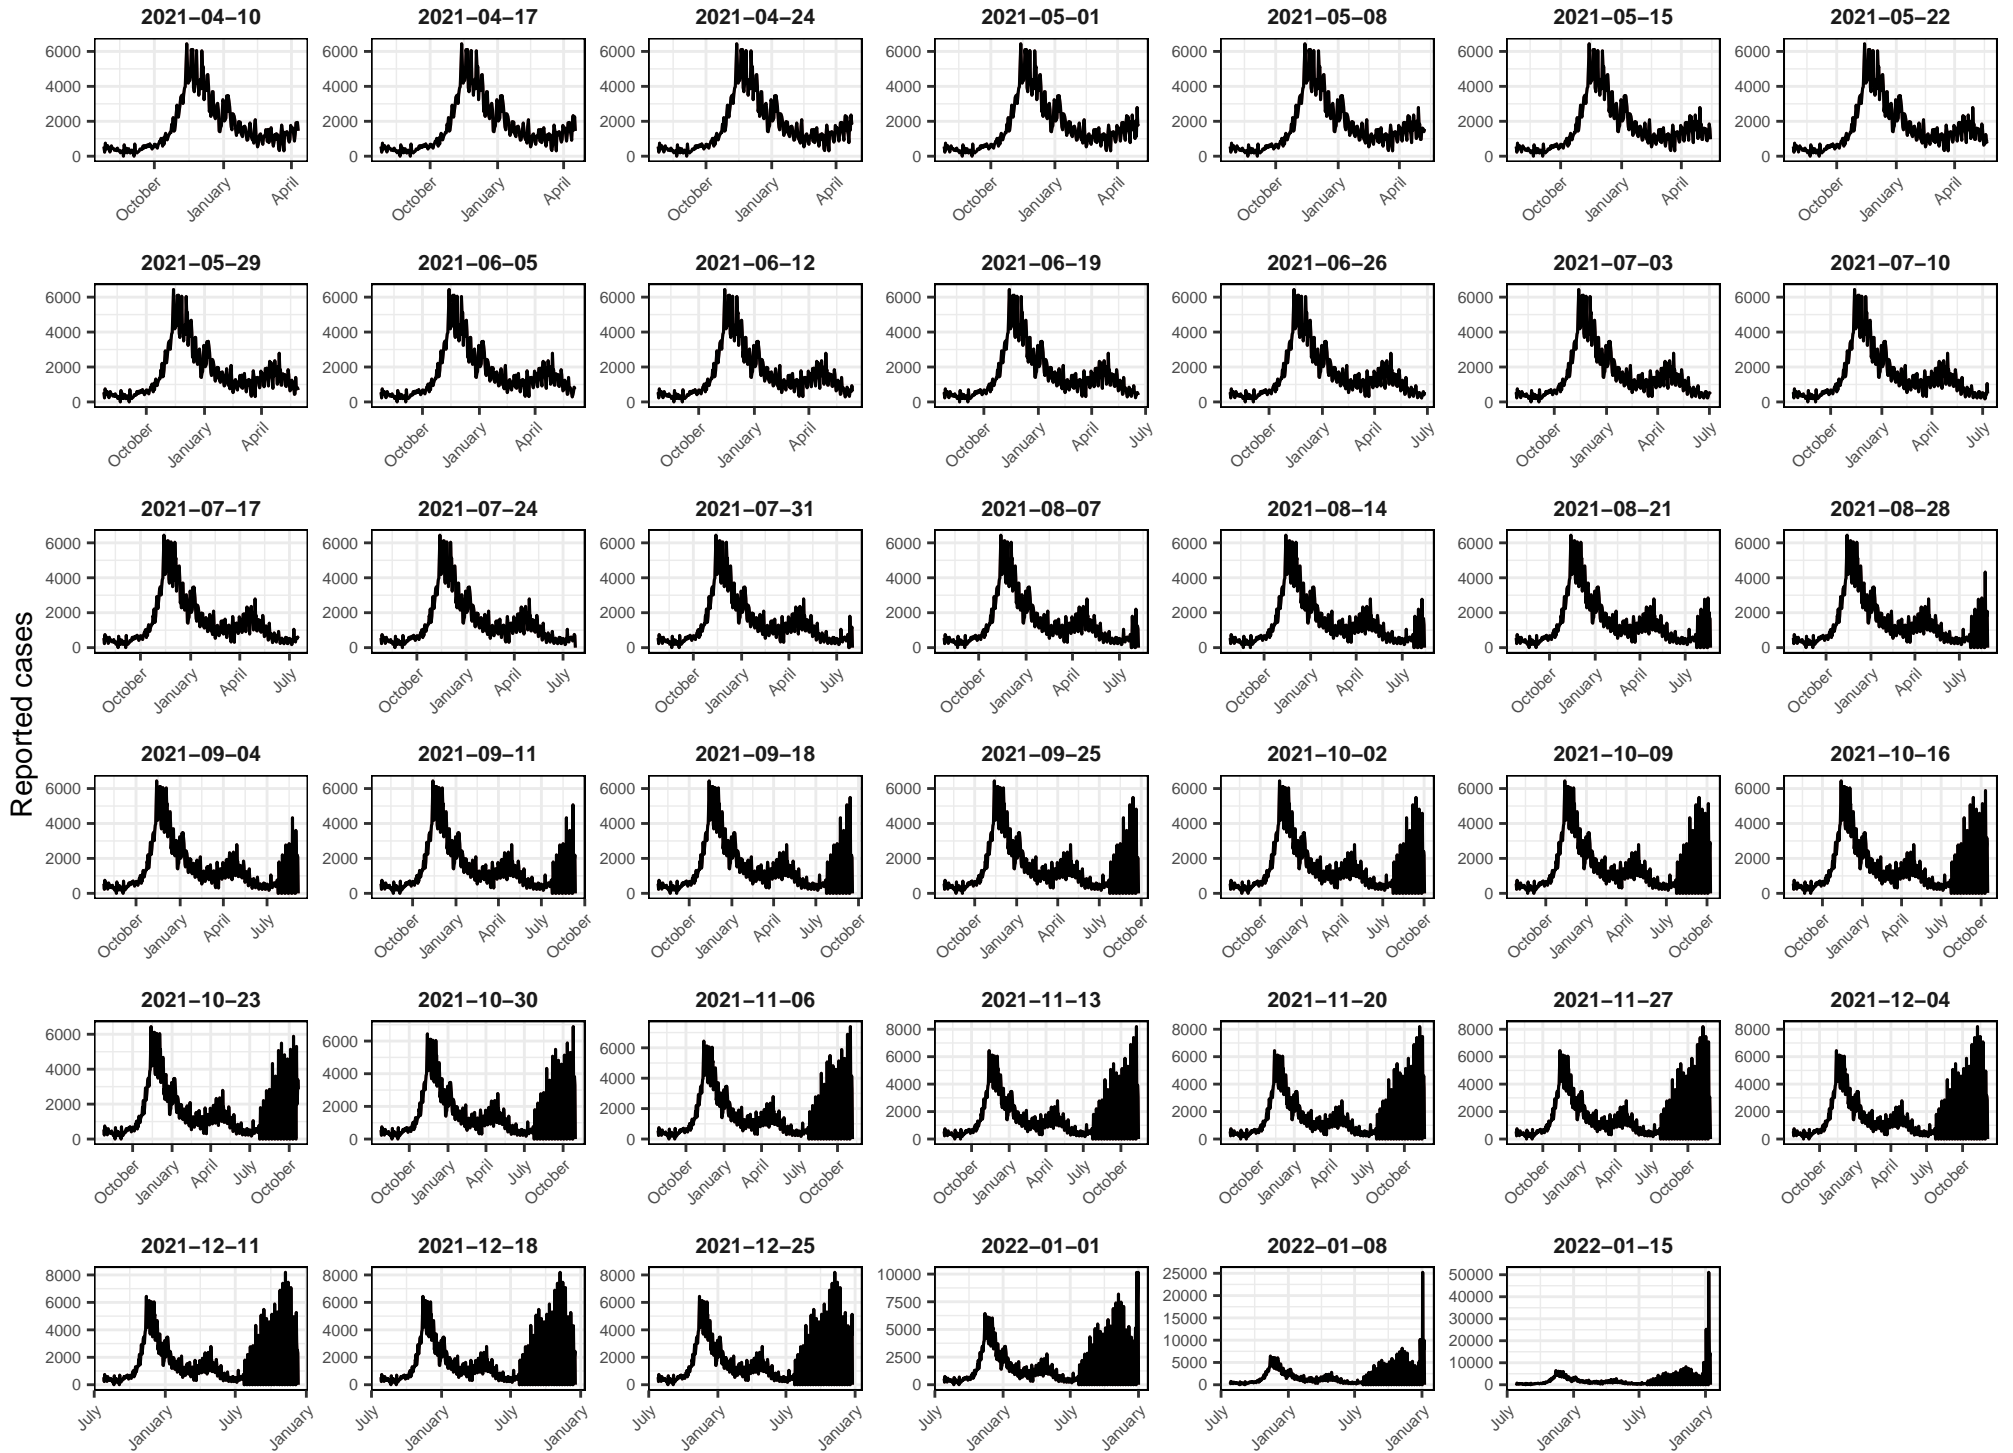

# Connecticut

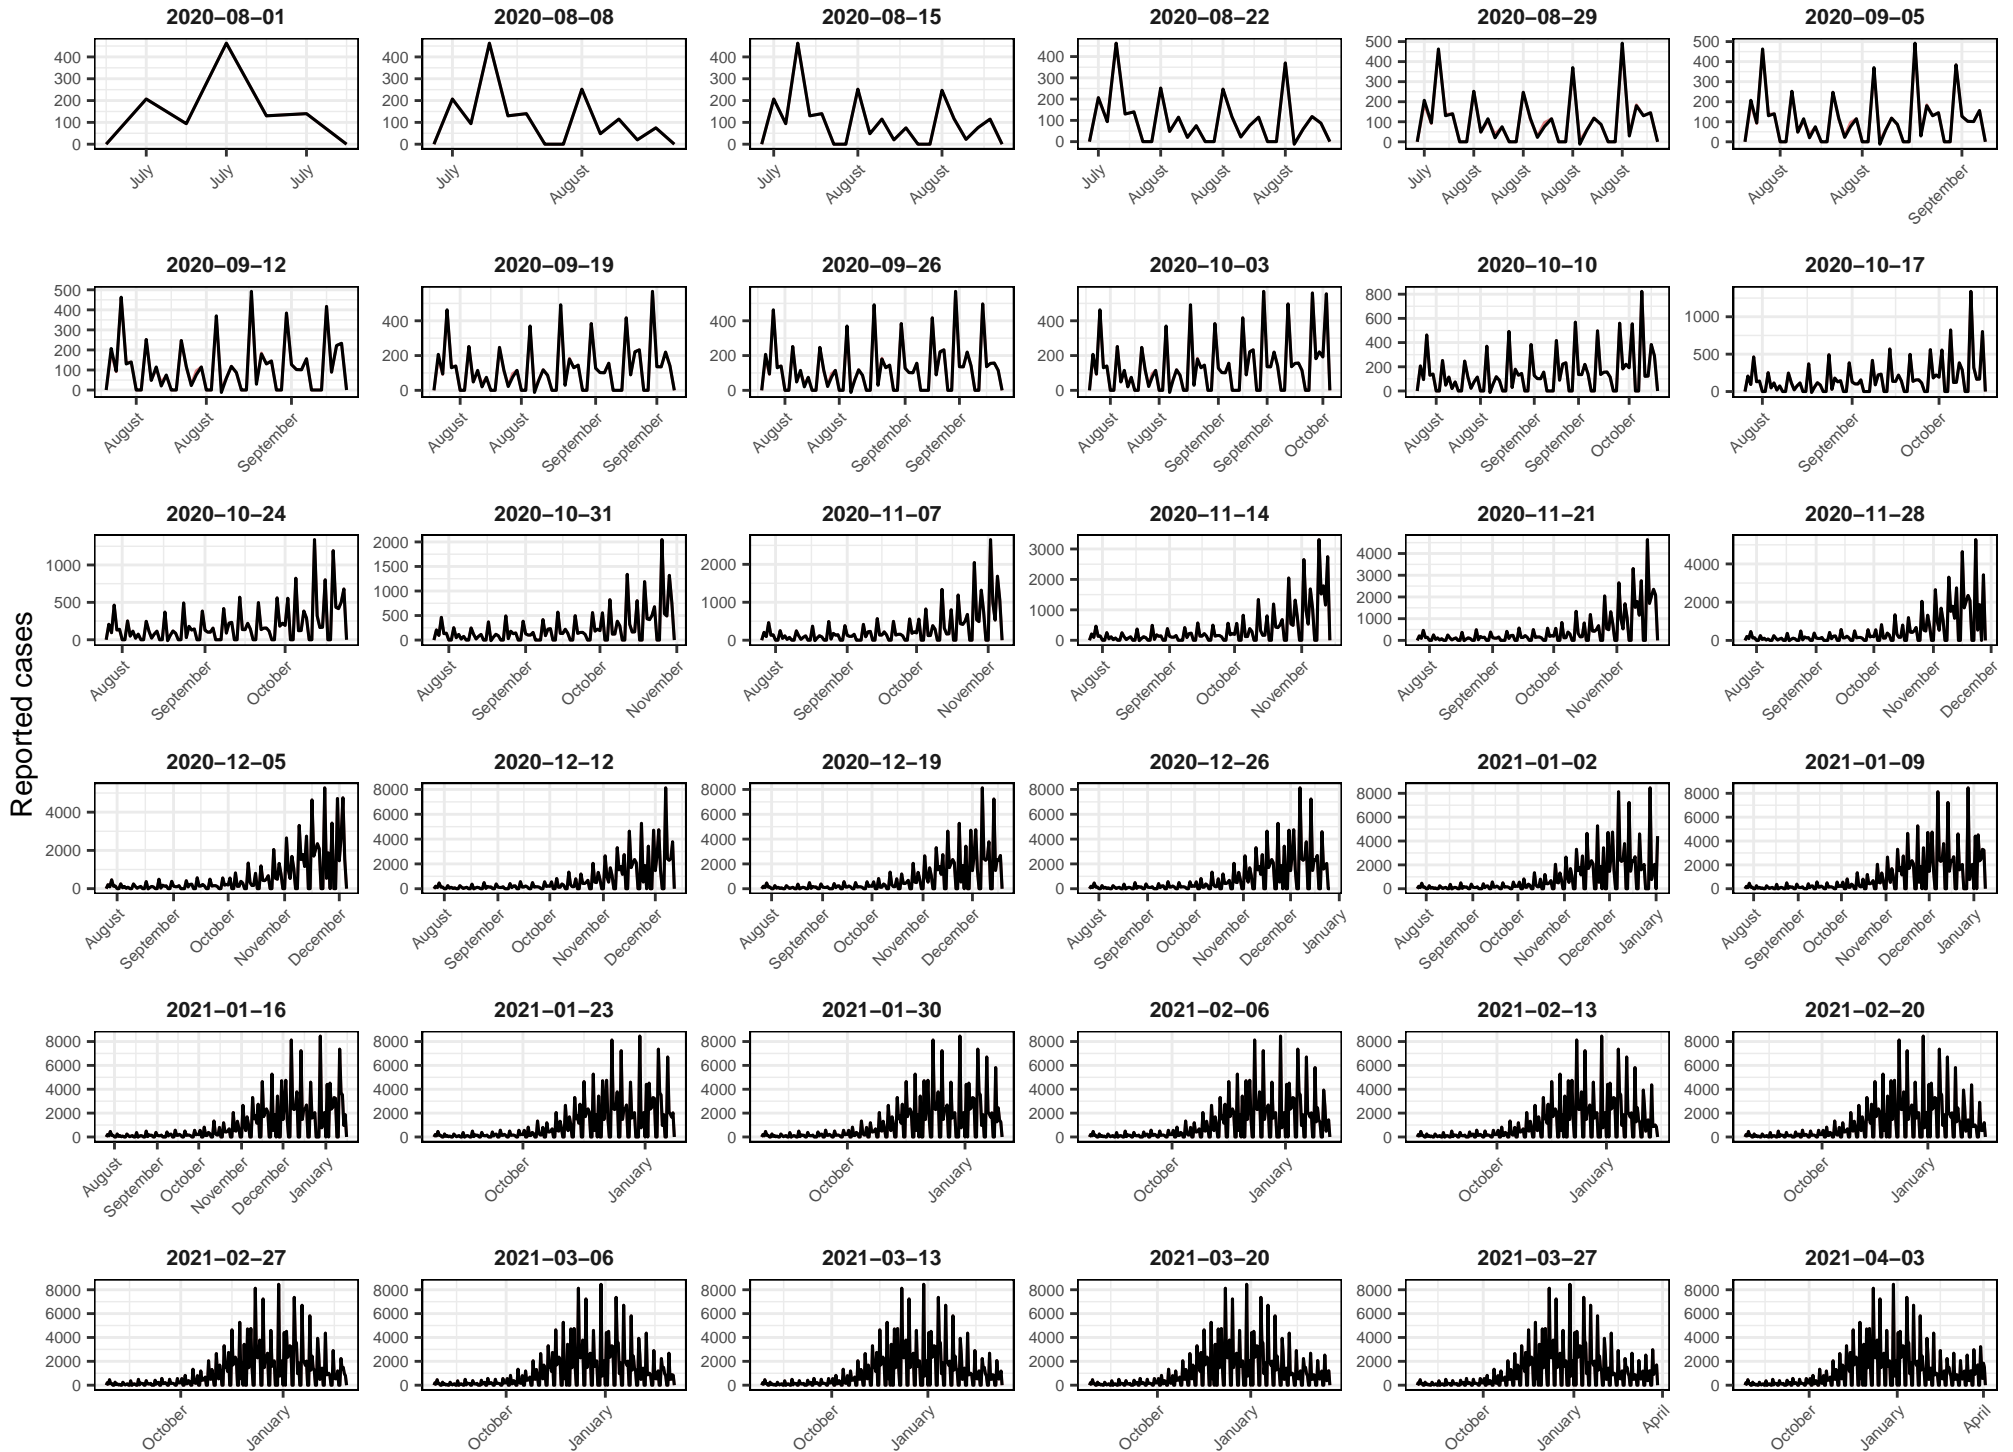

# Connecticut

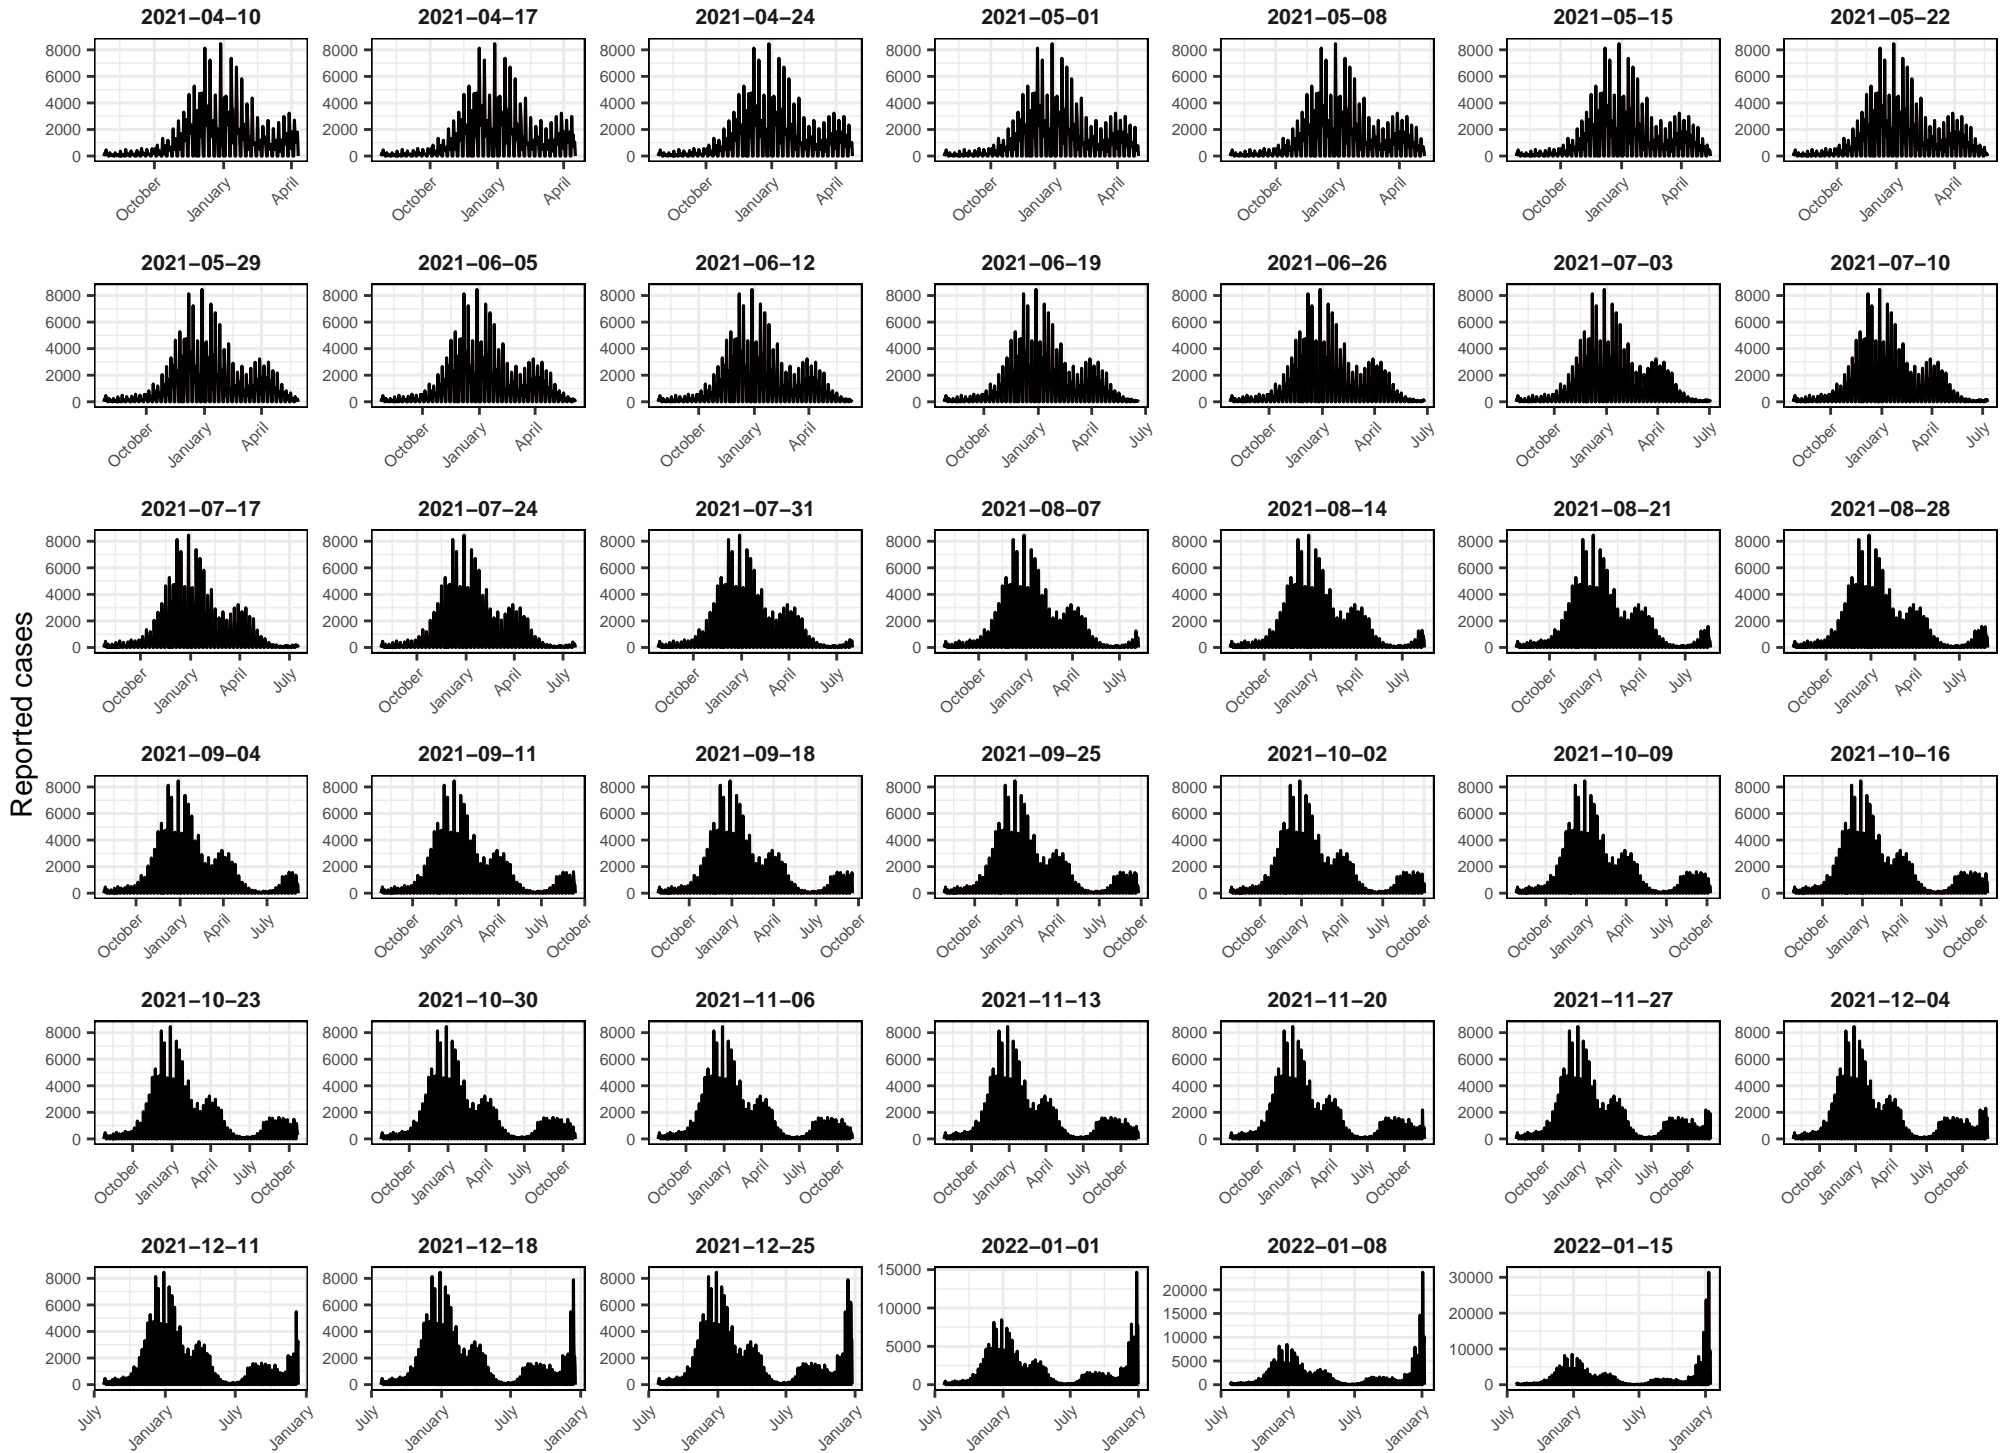

# Delaware

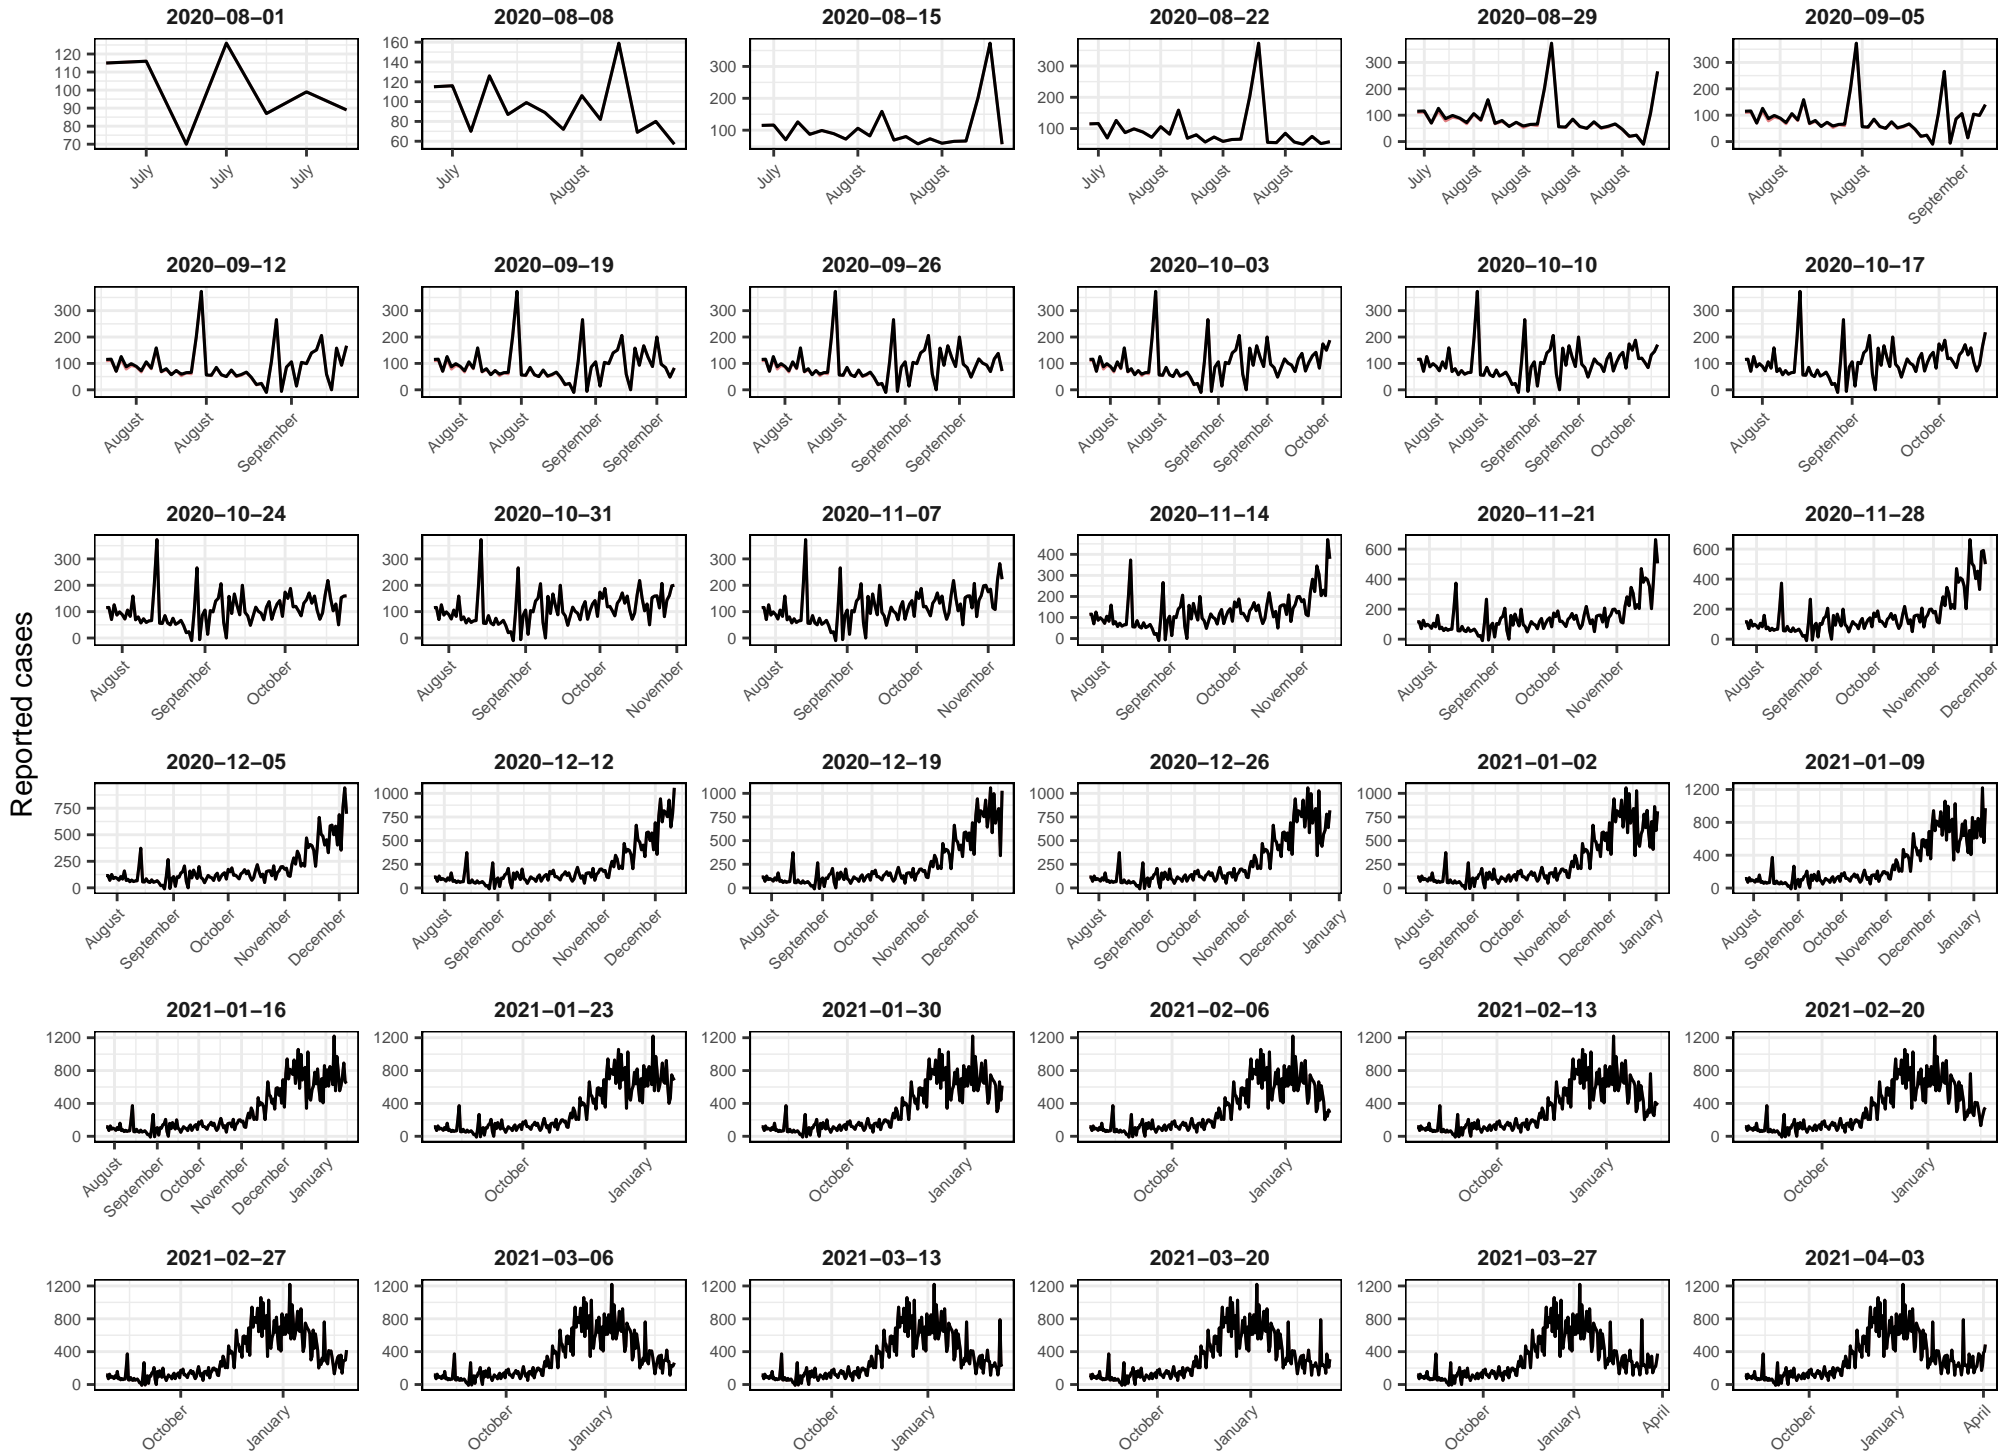

# Delaware

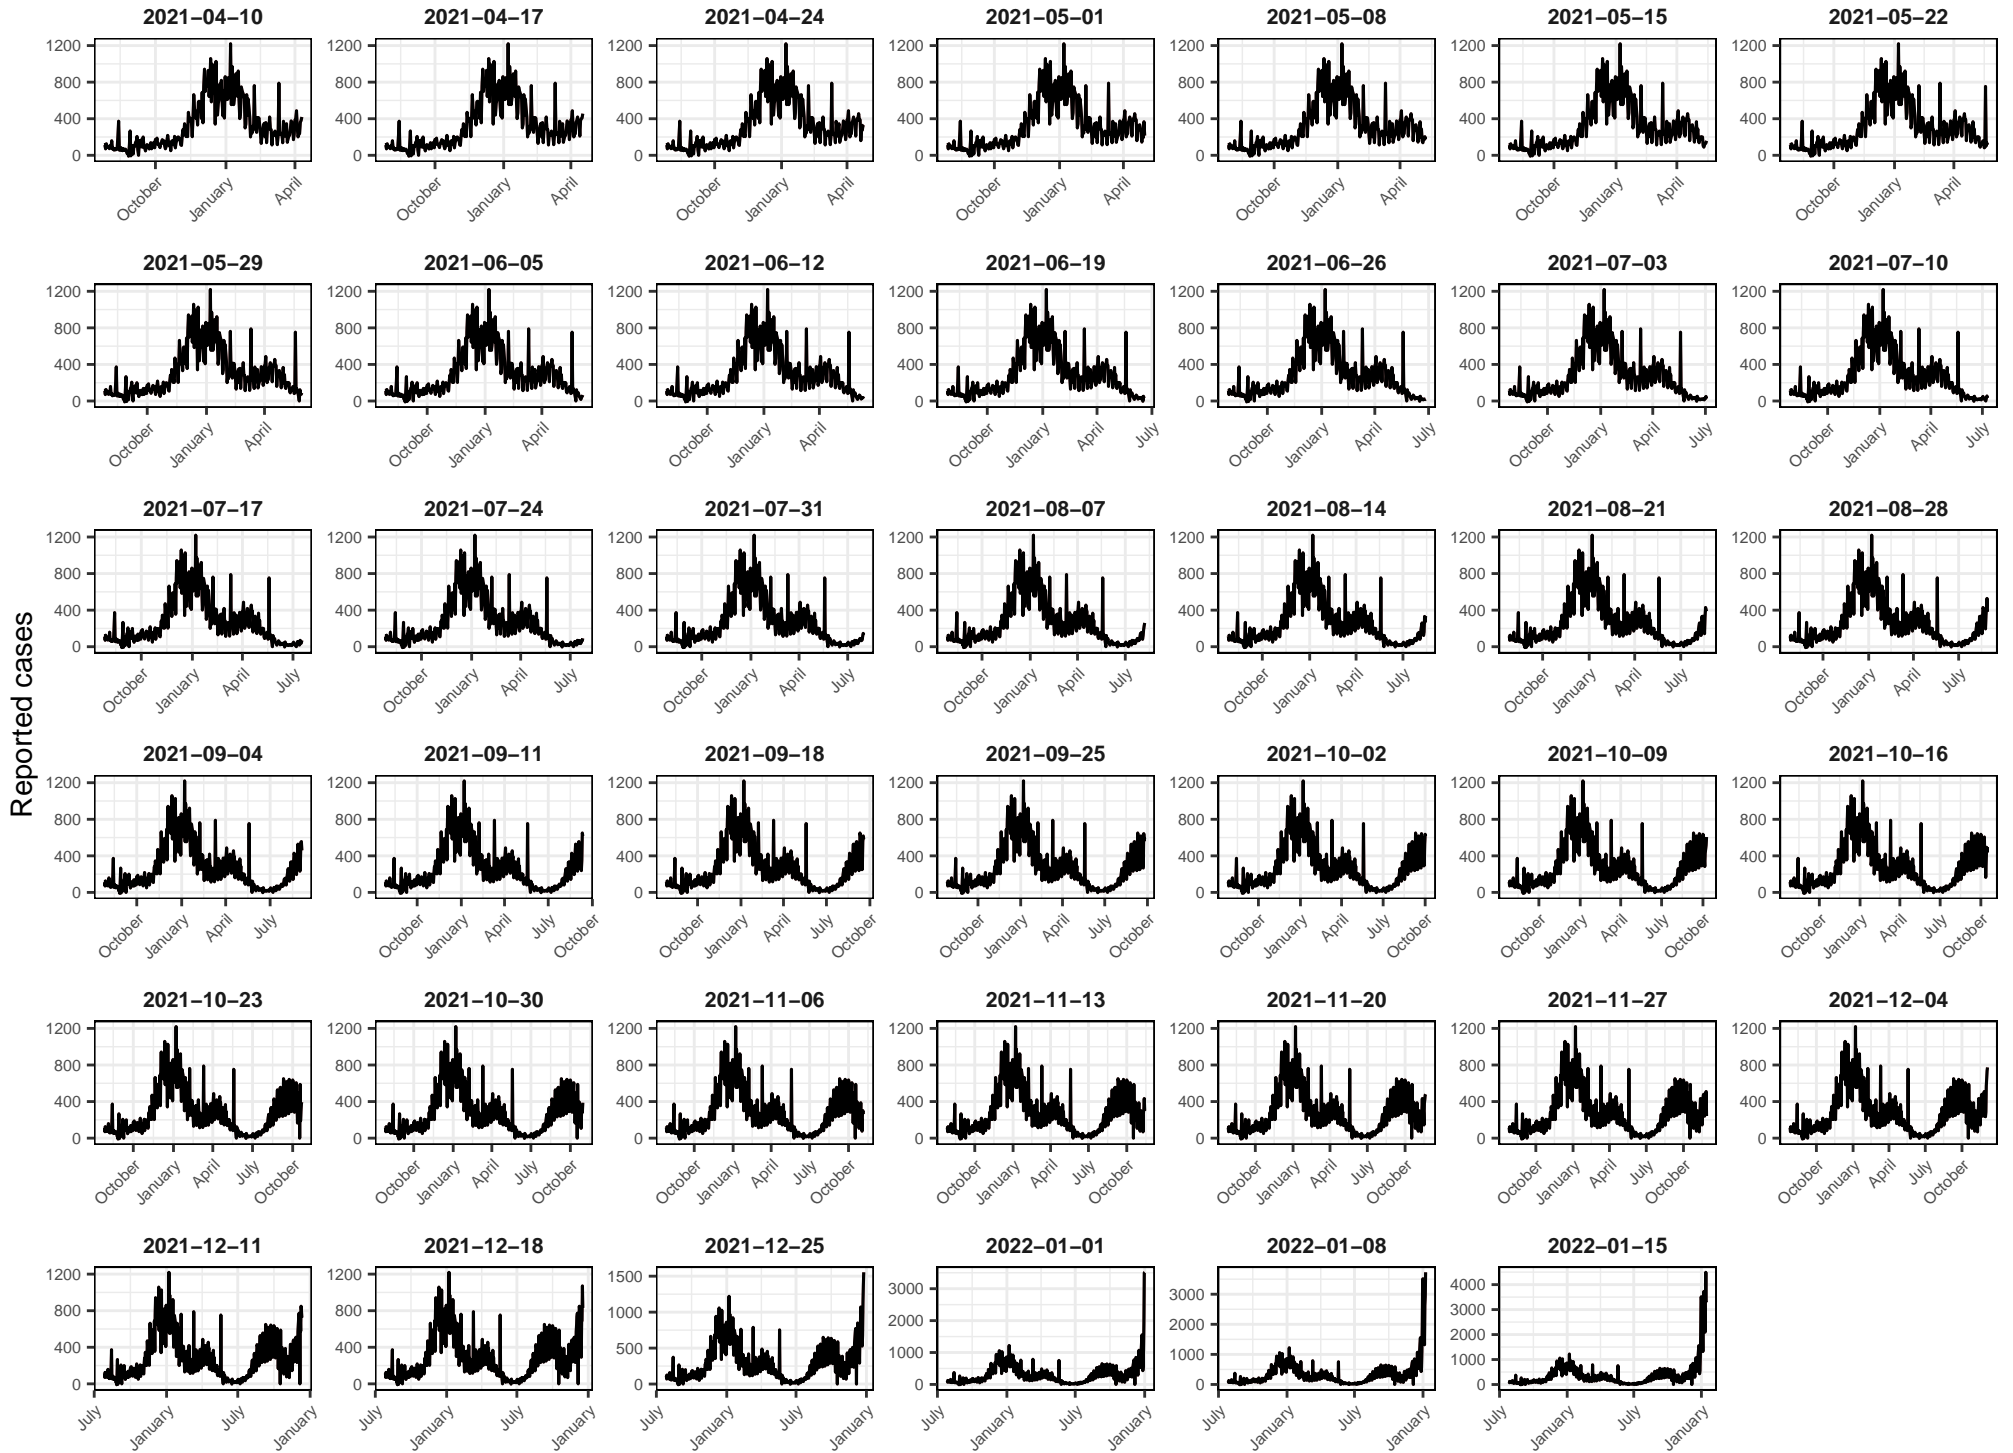



# District of Columbia

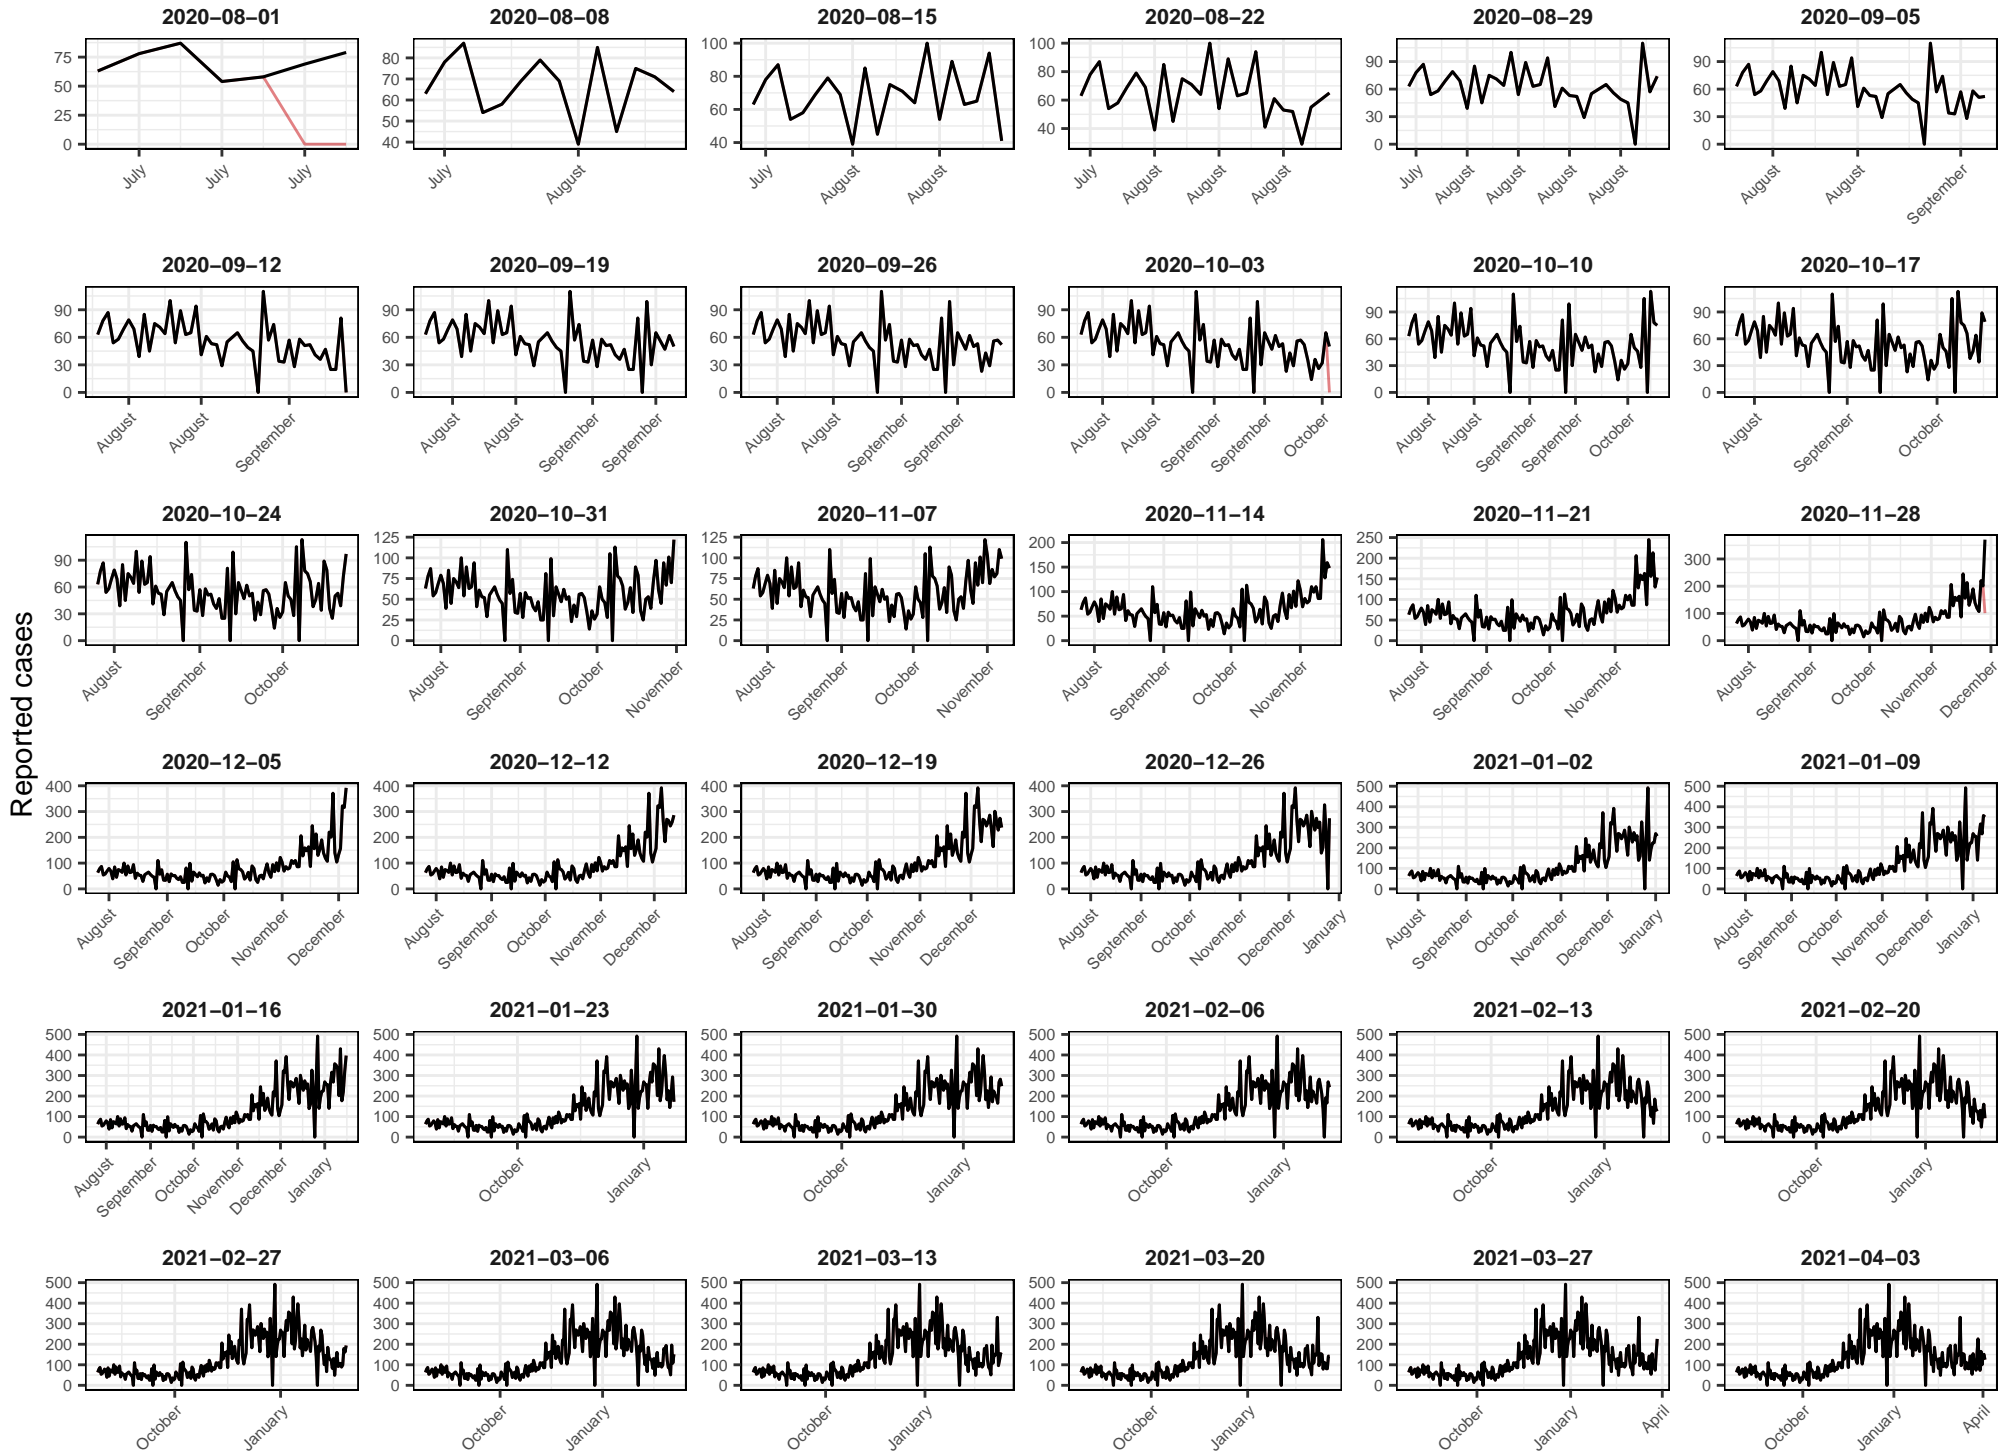

# District of Columbia

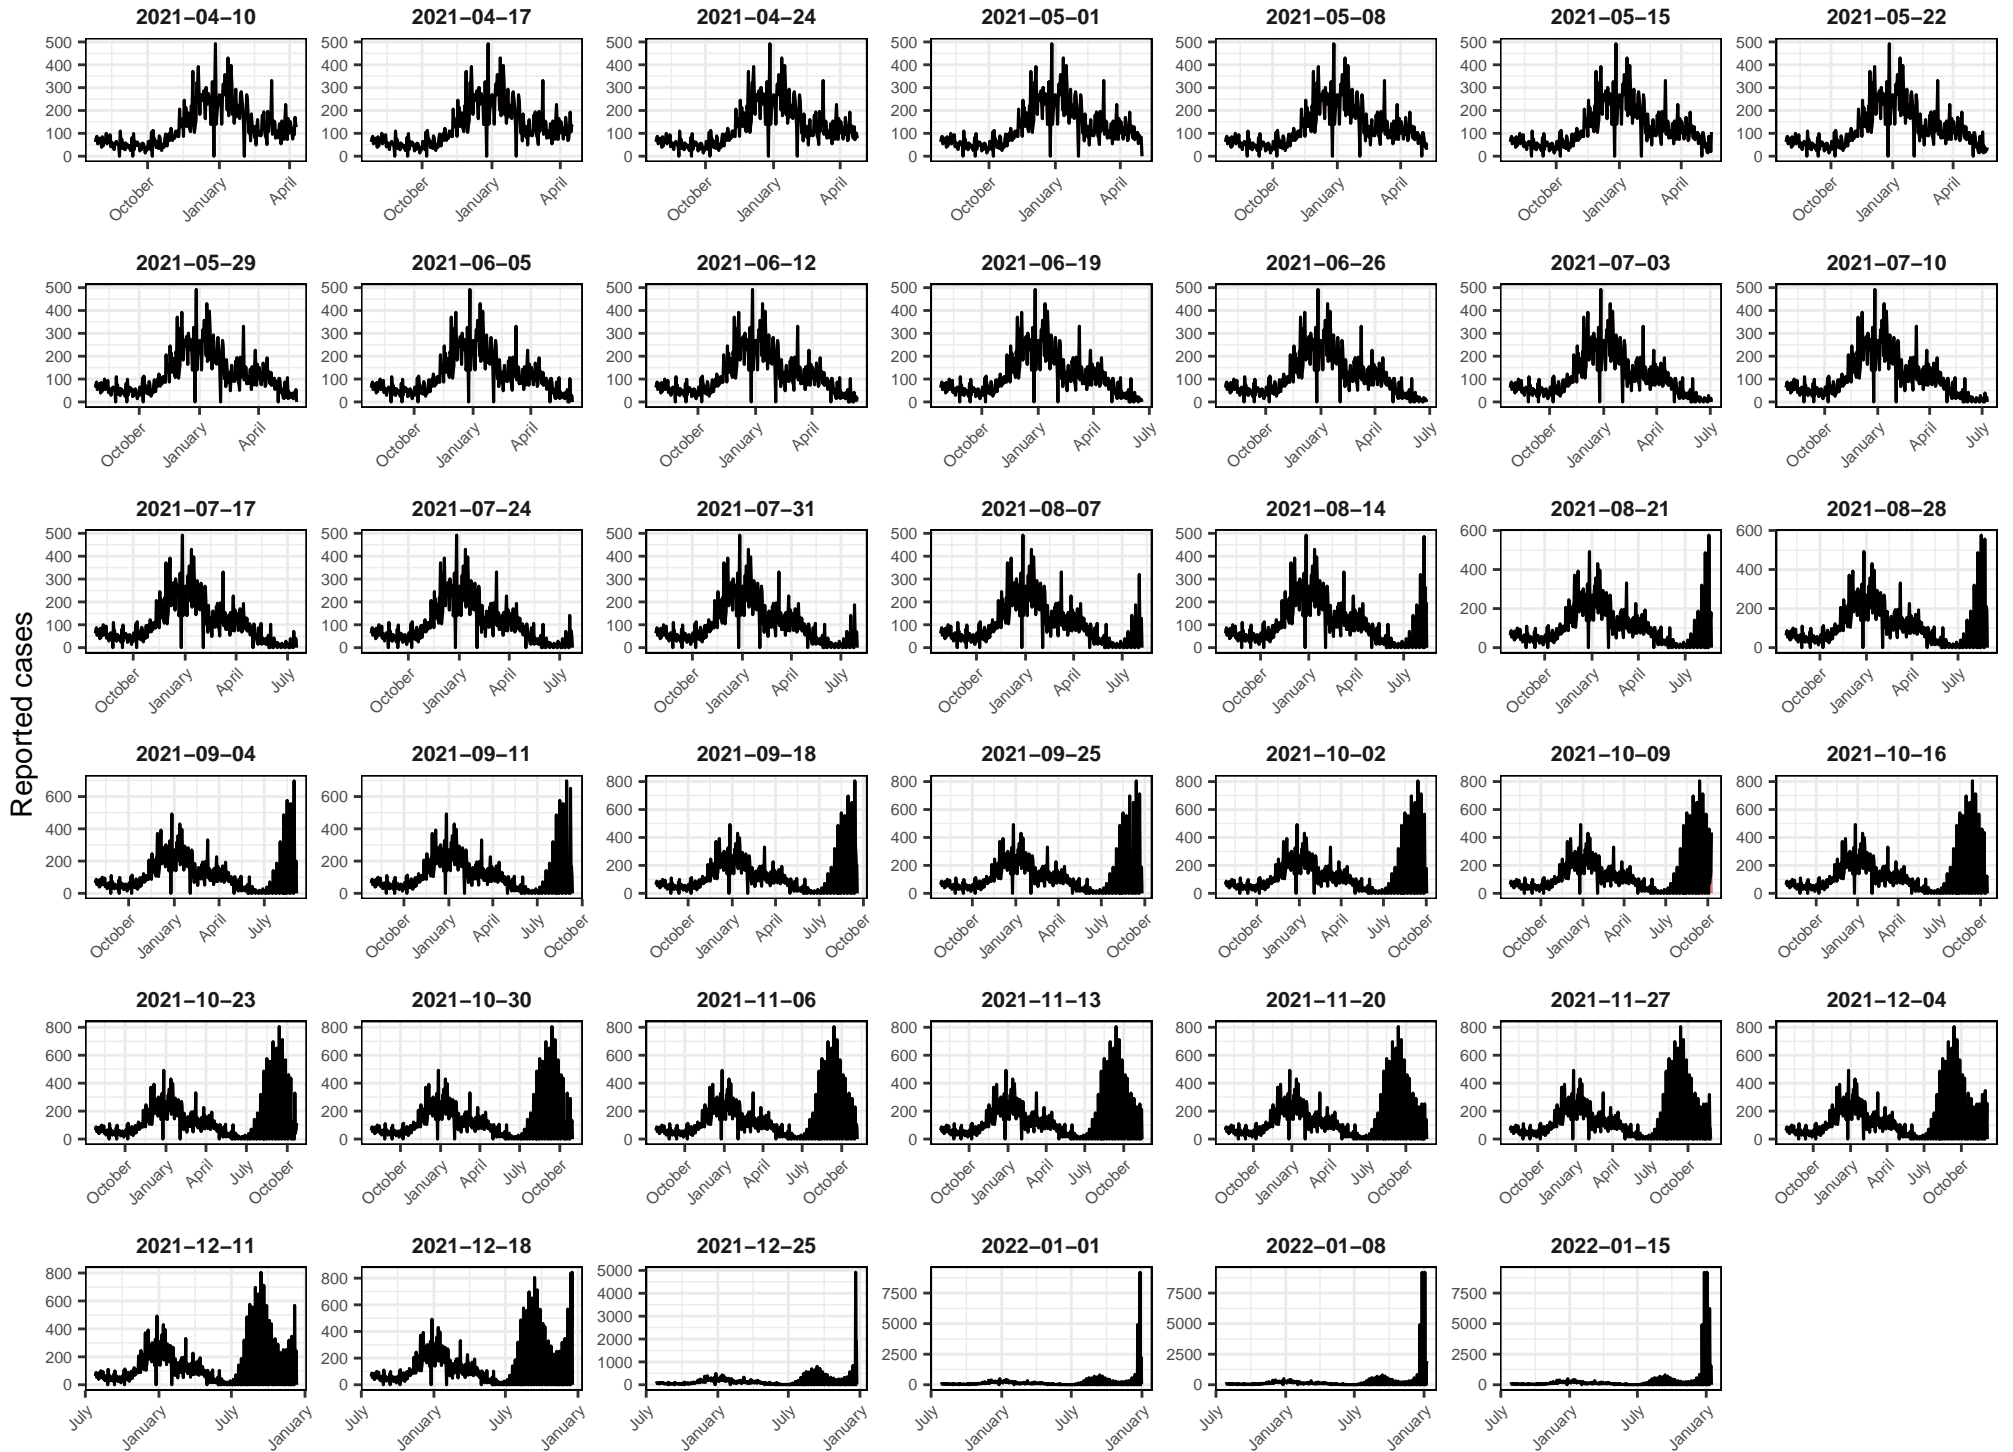

# Florida

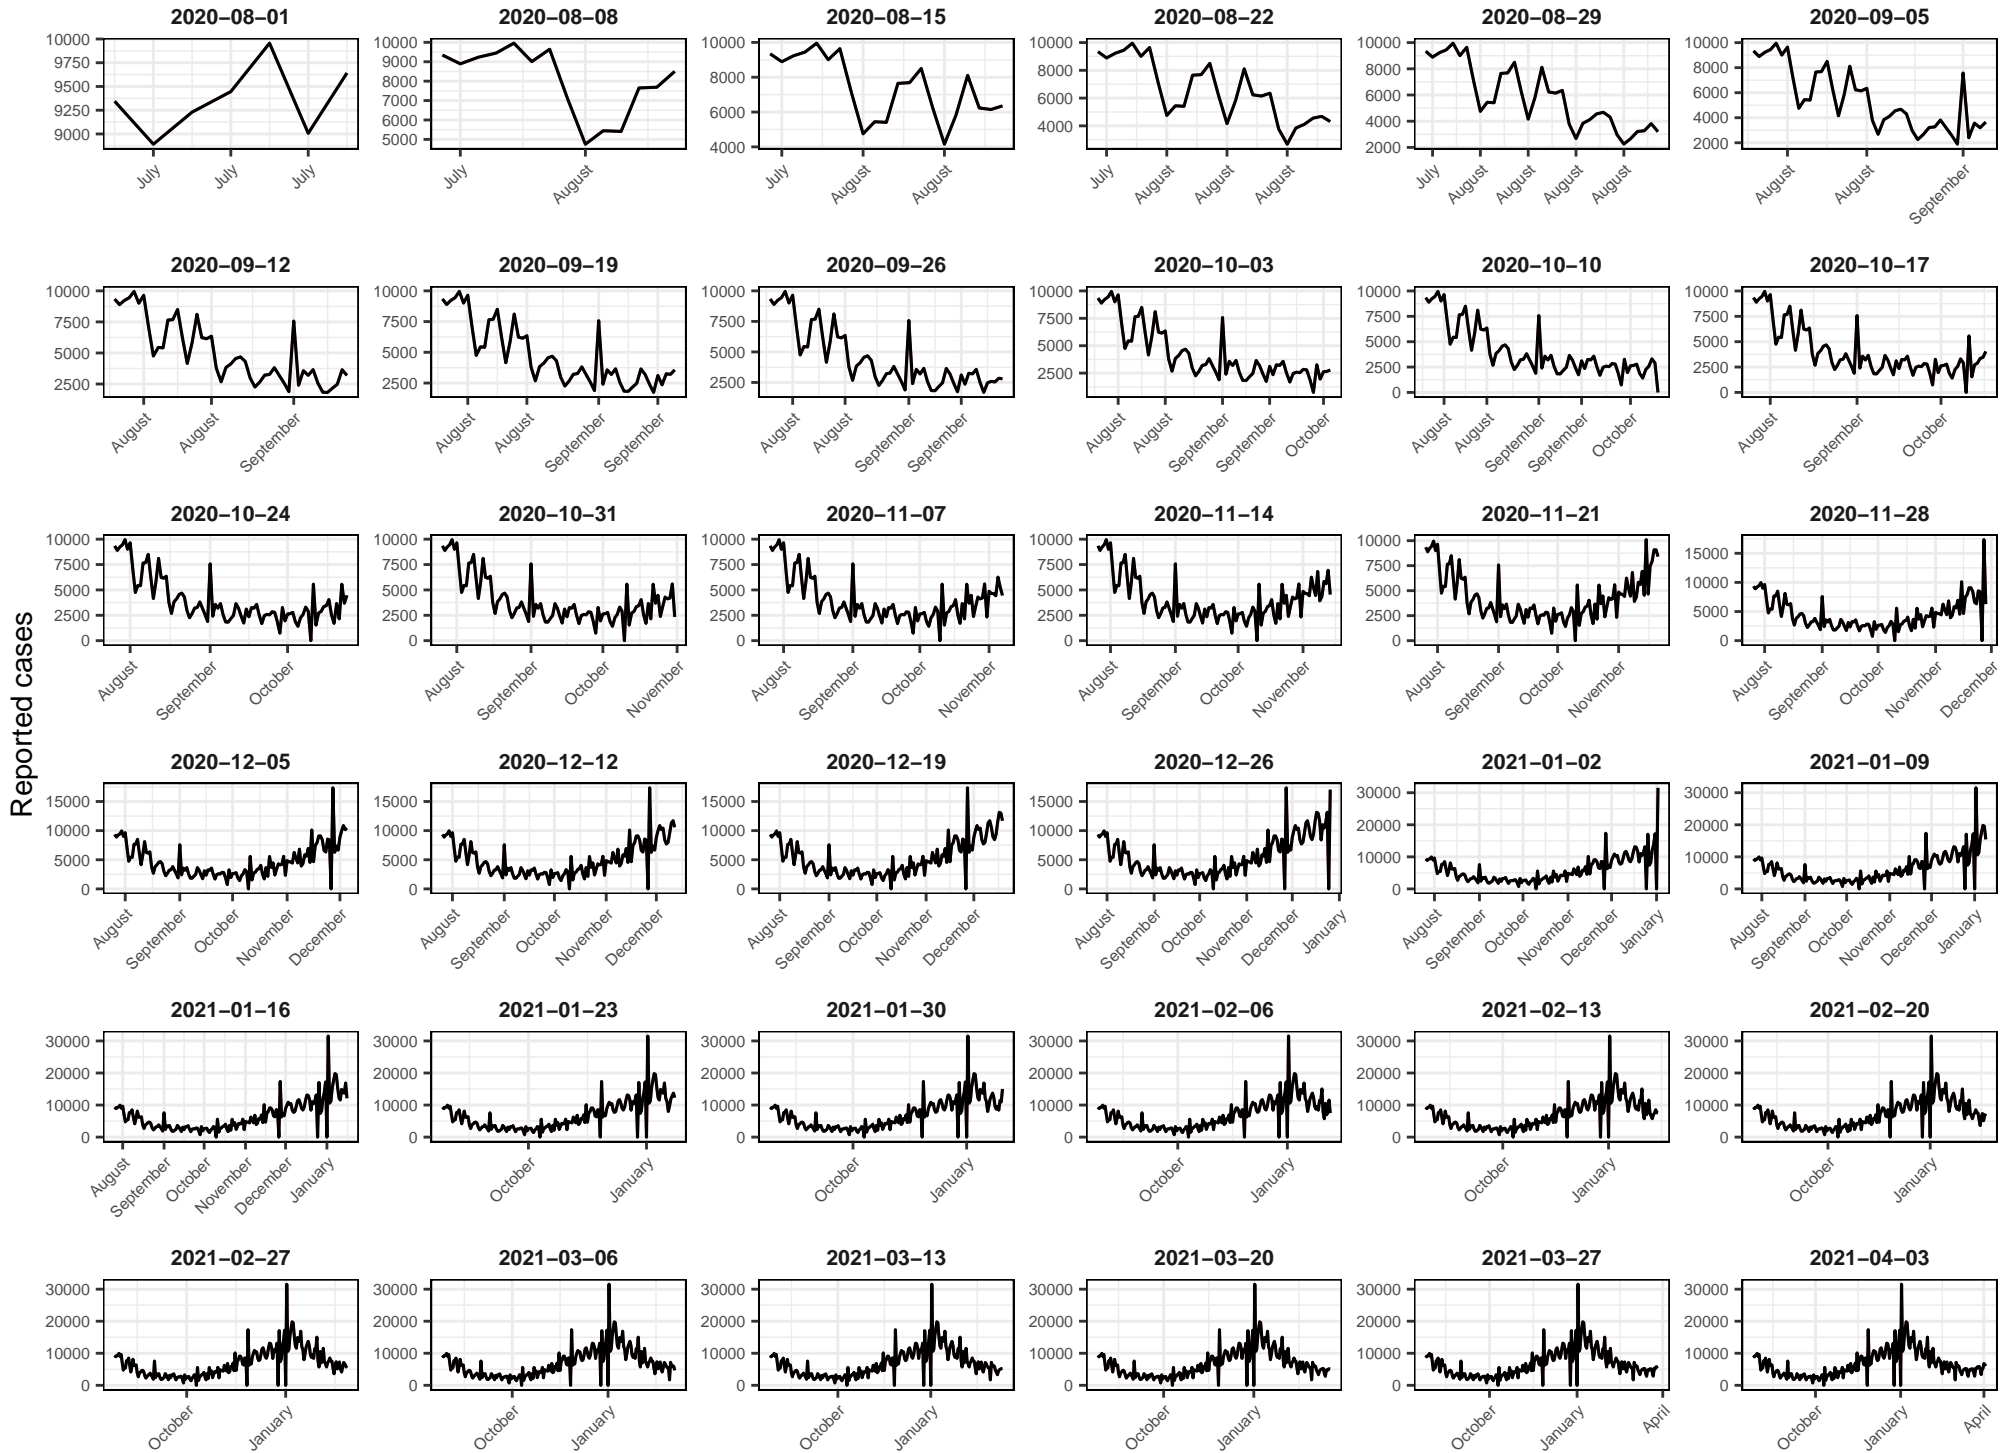

# Florida

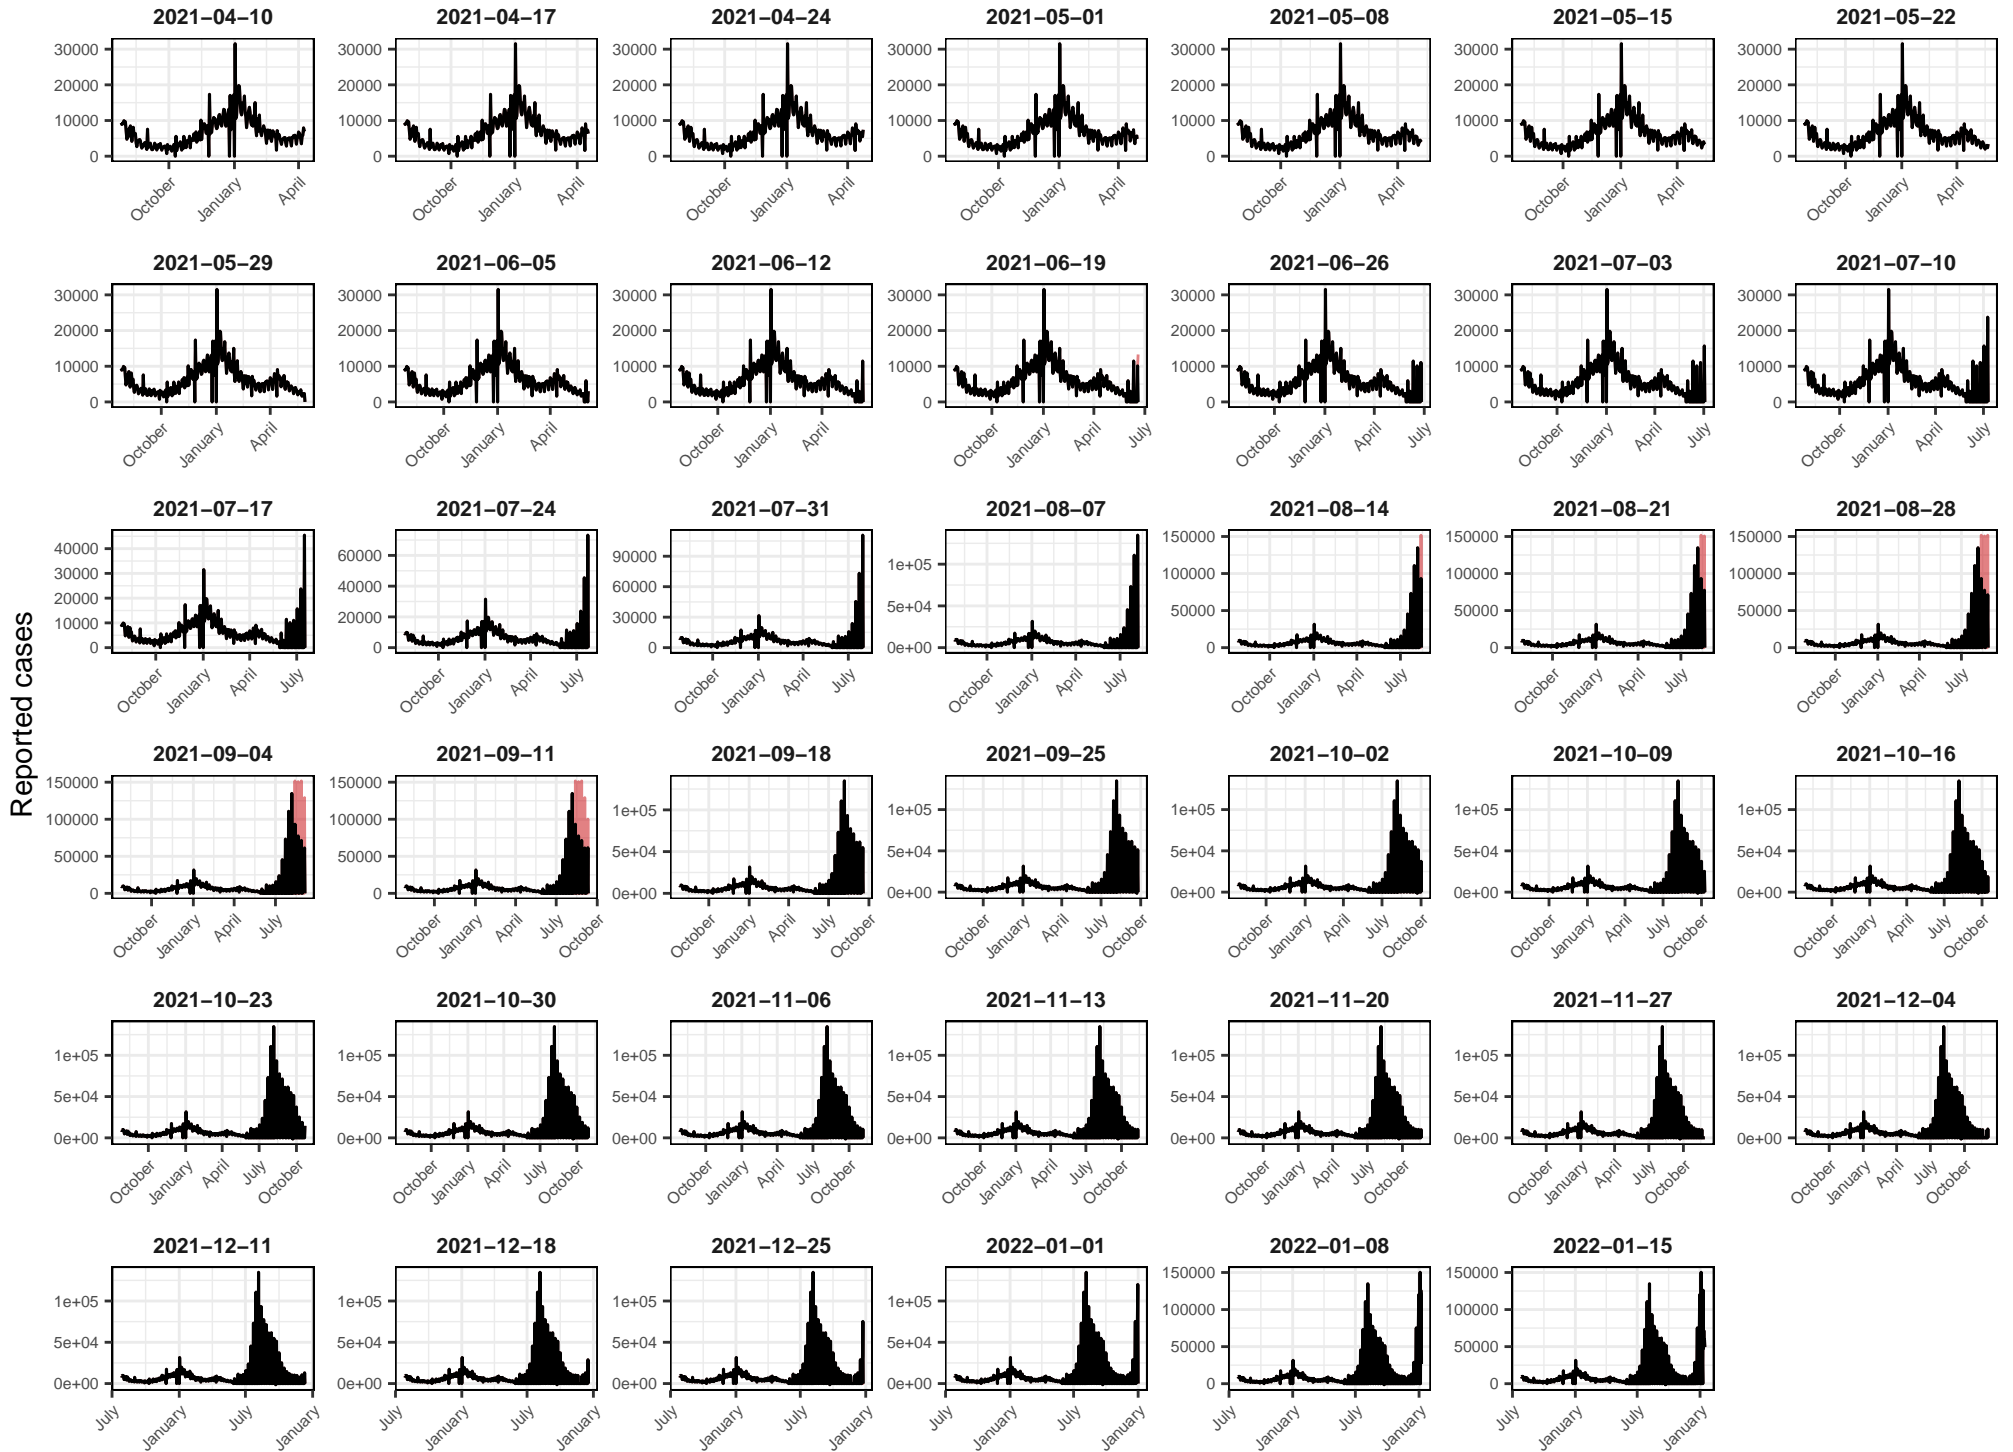

# Georgia

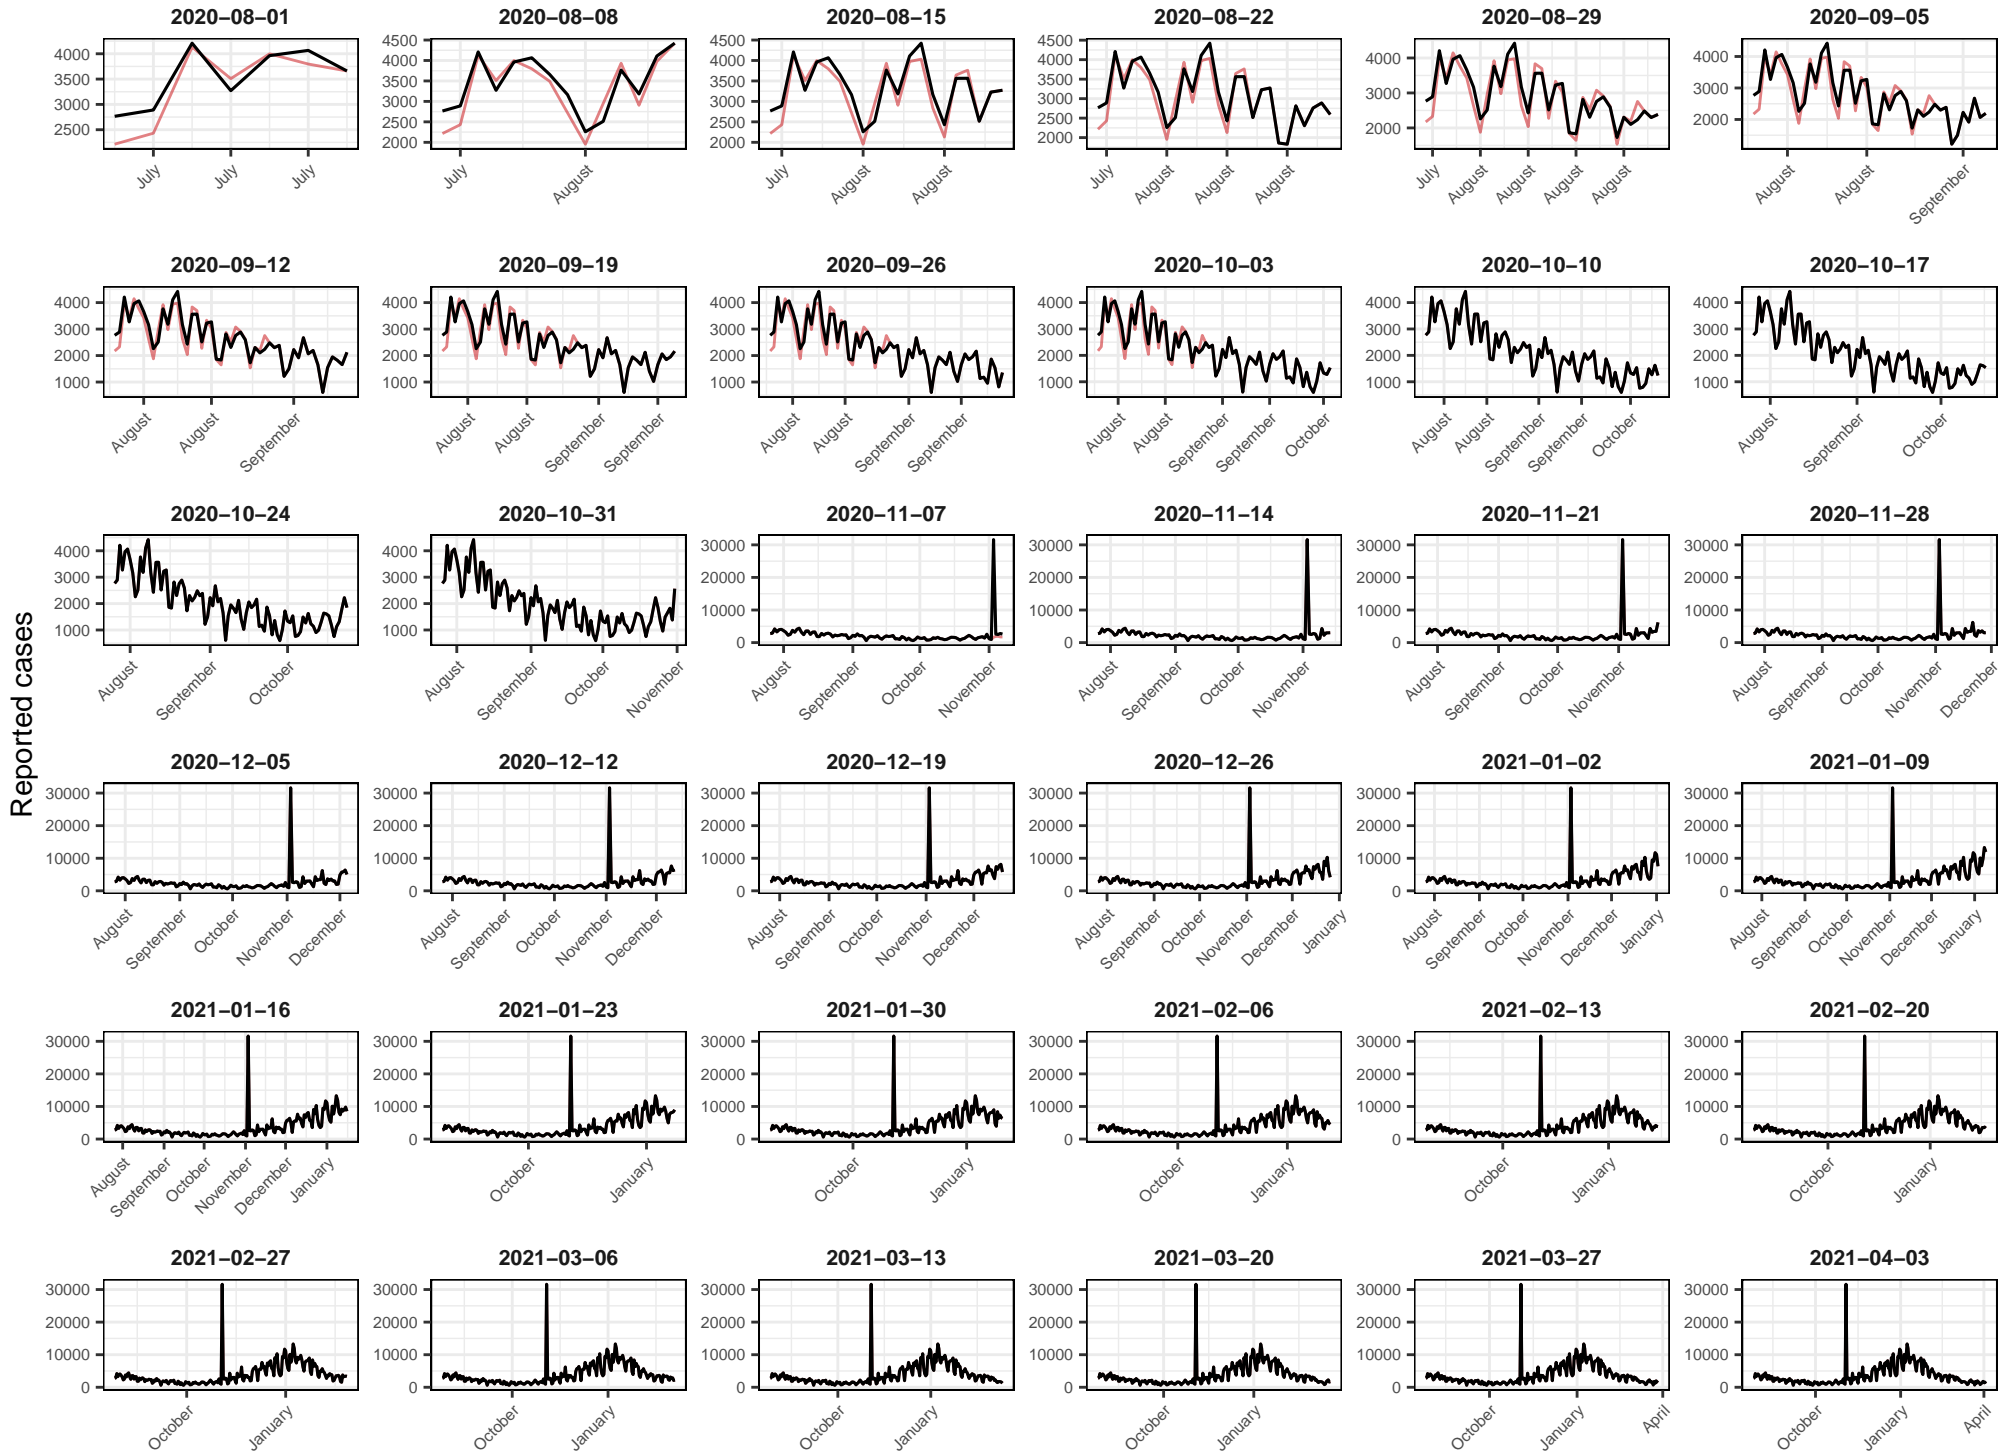

# Georgia

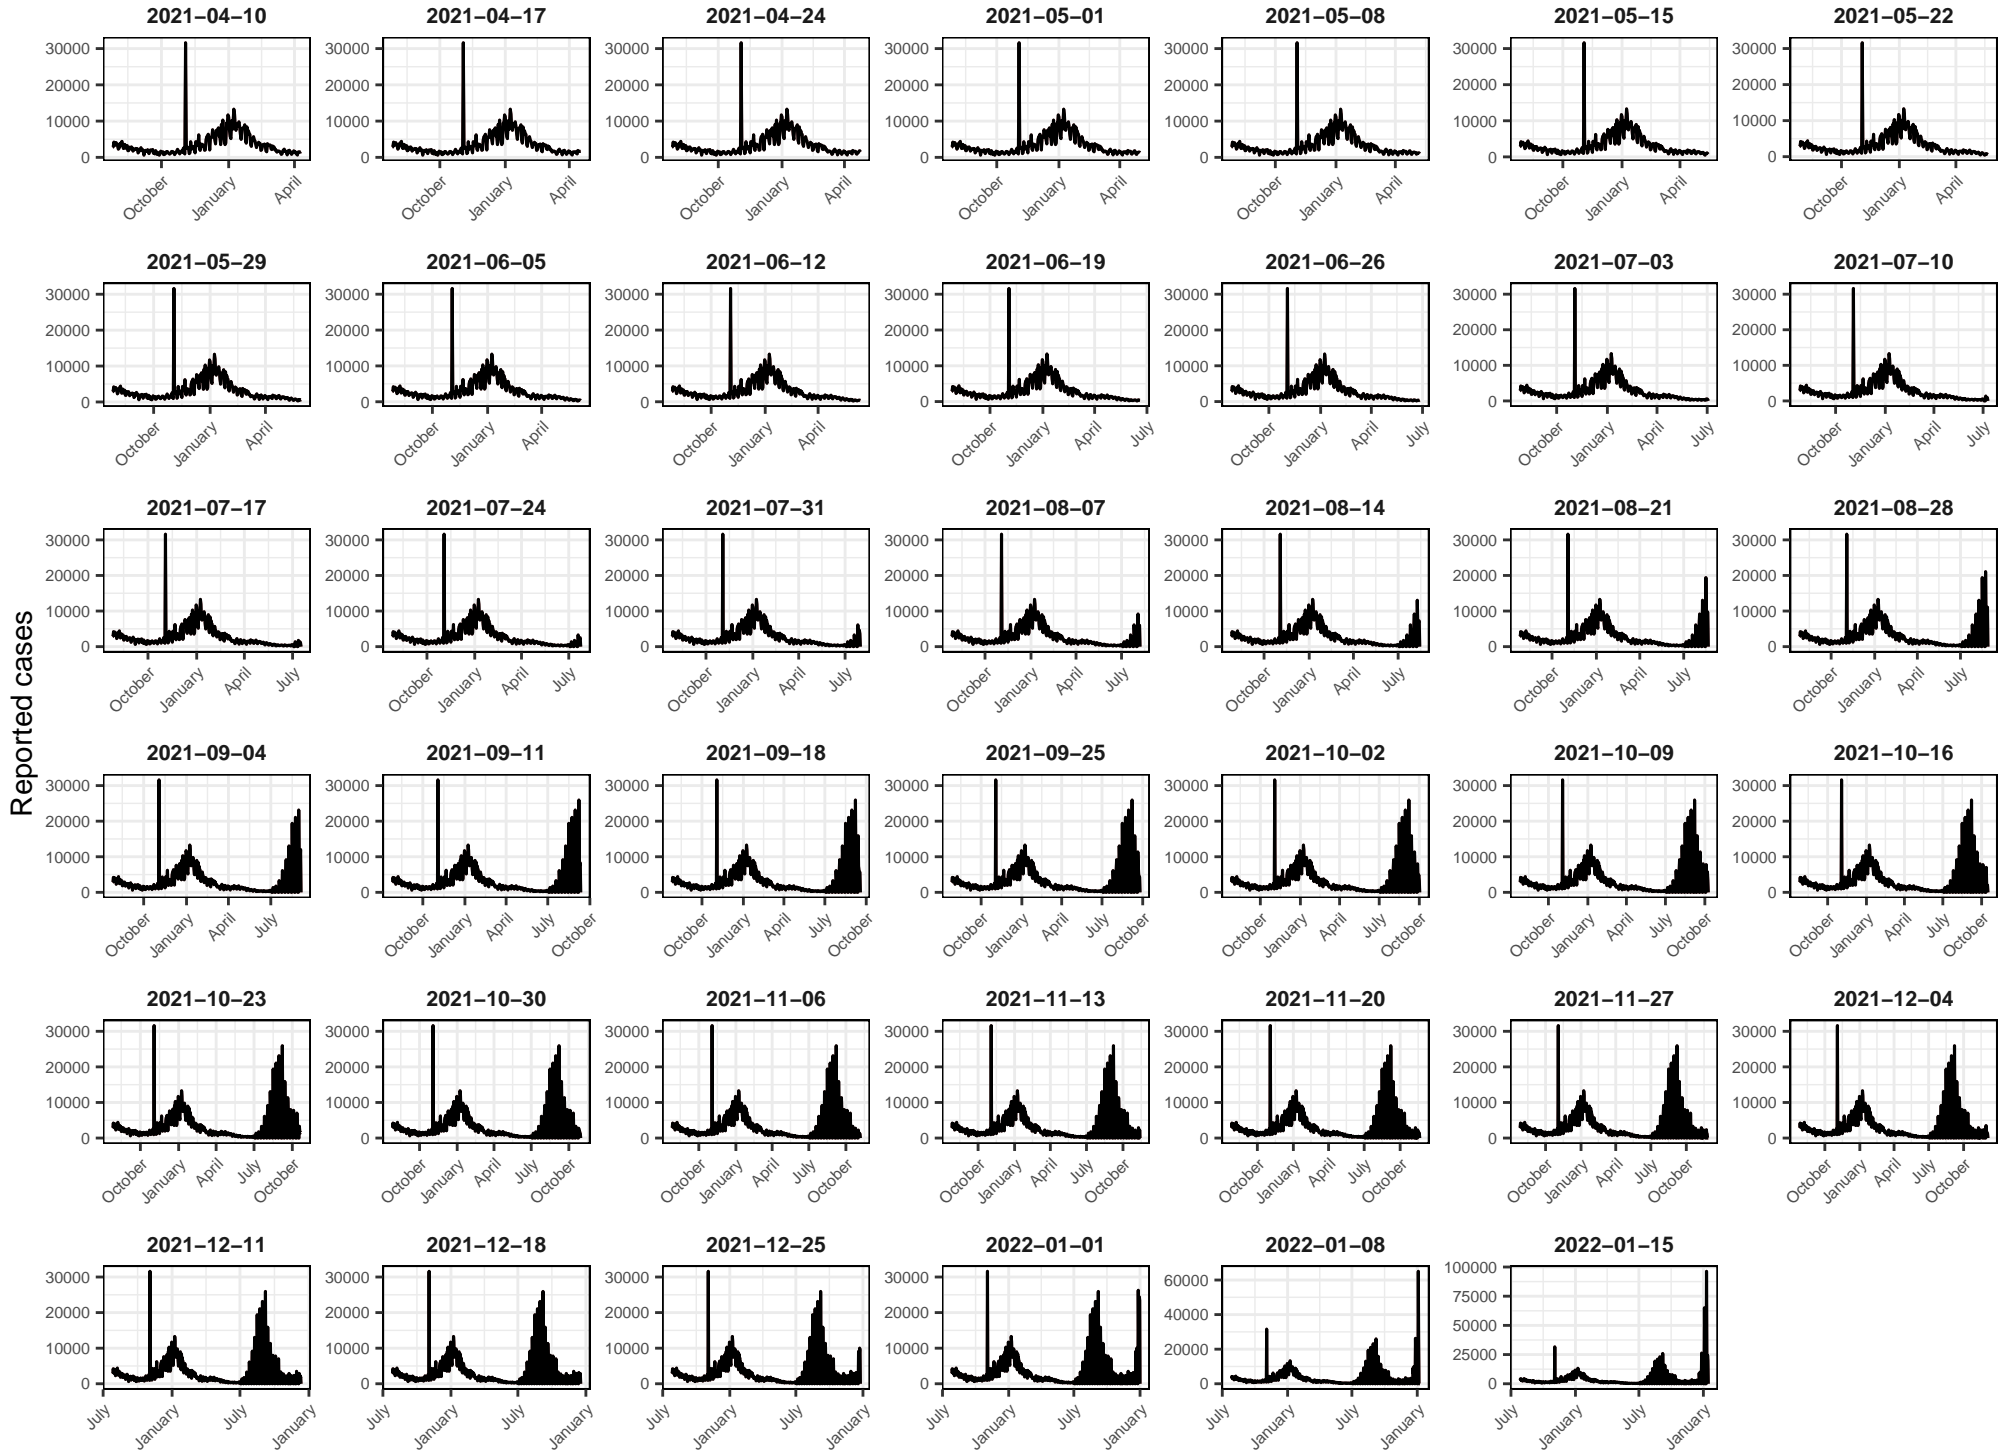

# Hawaii

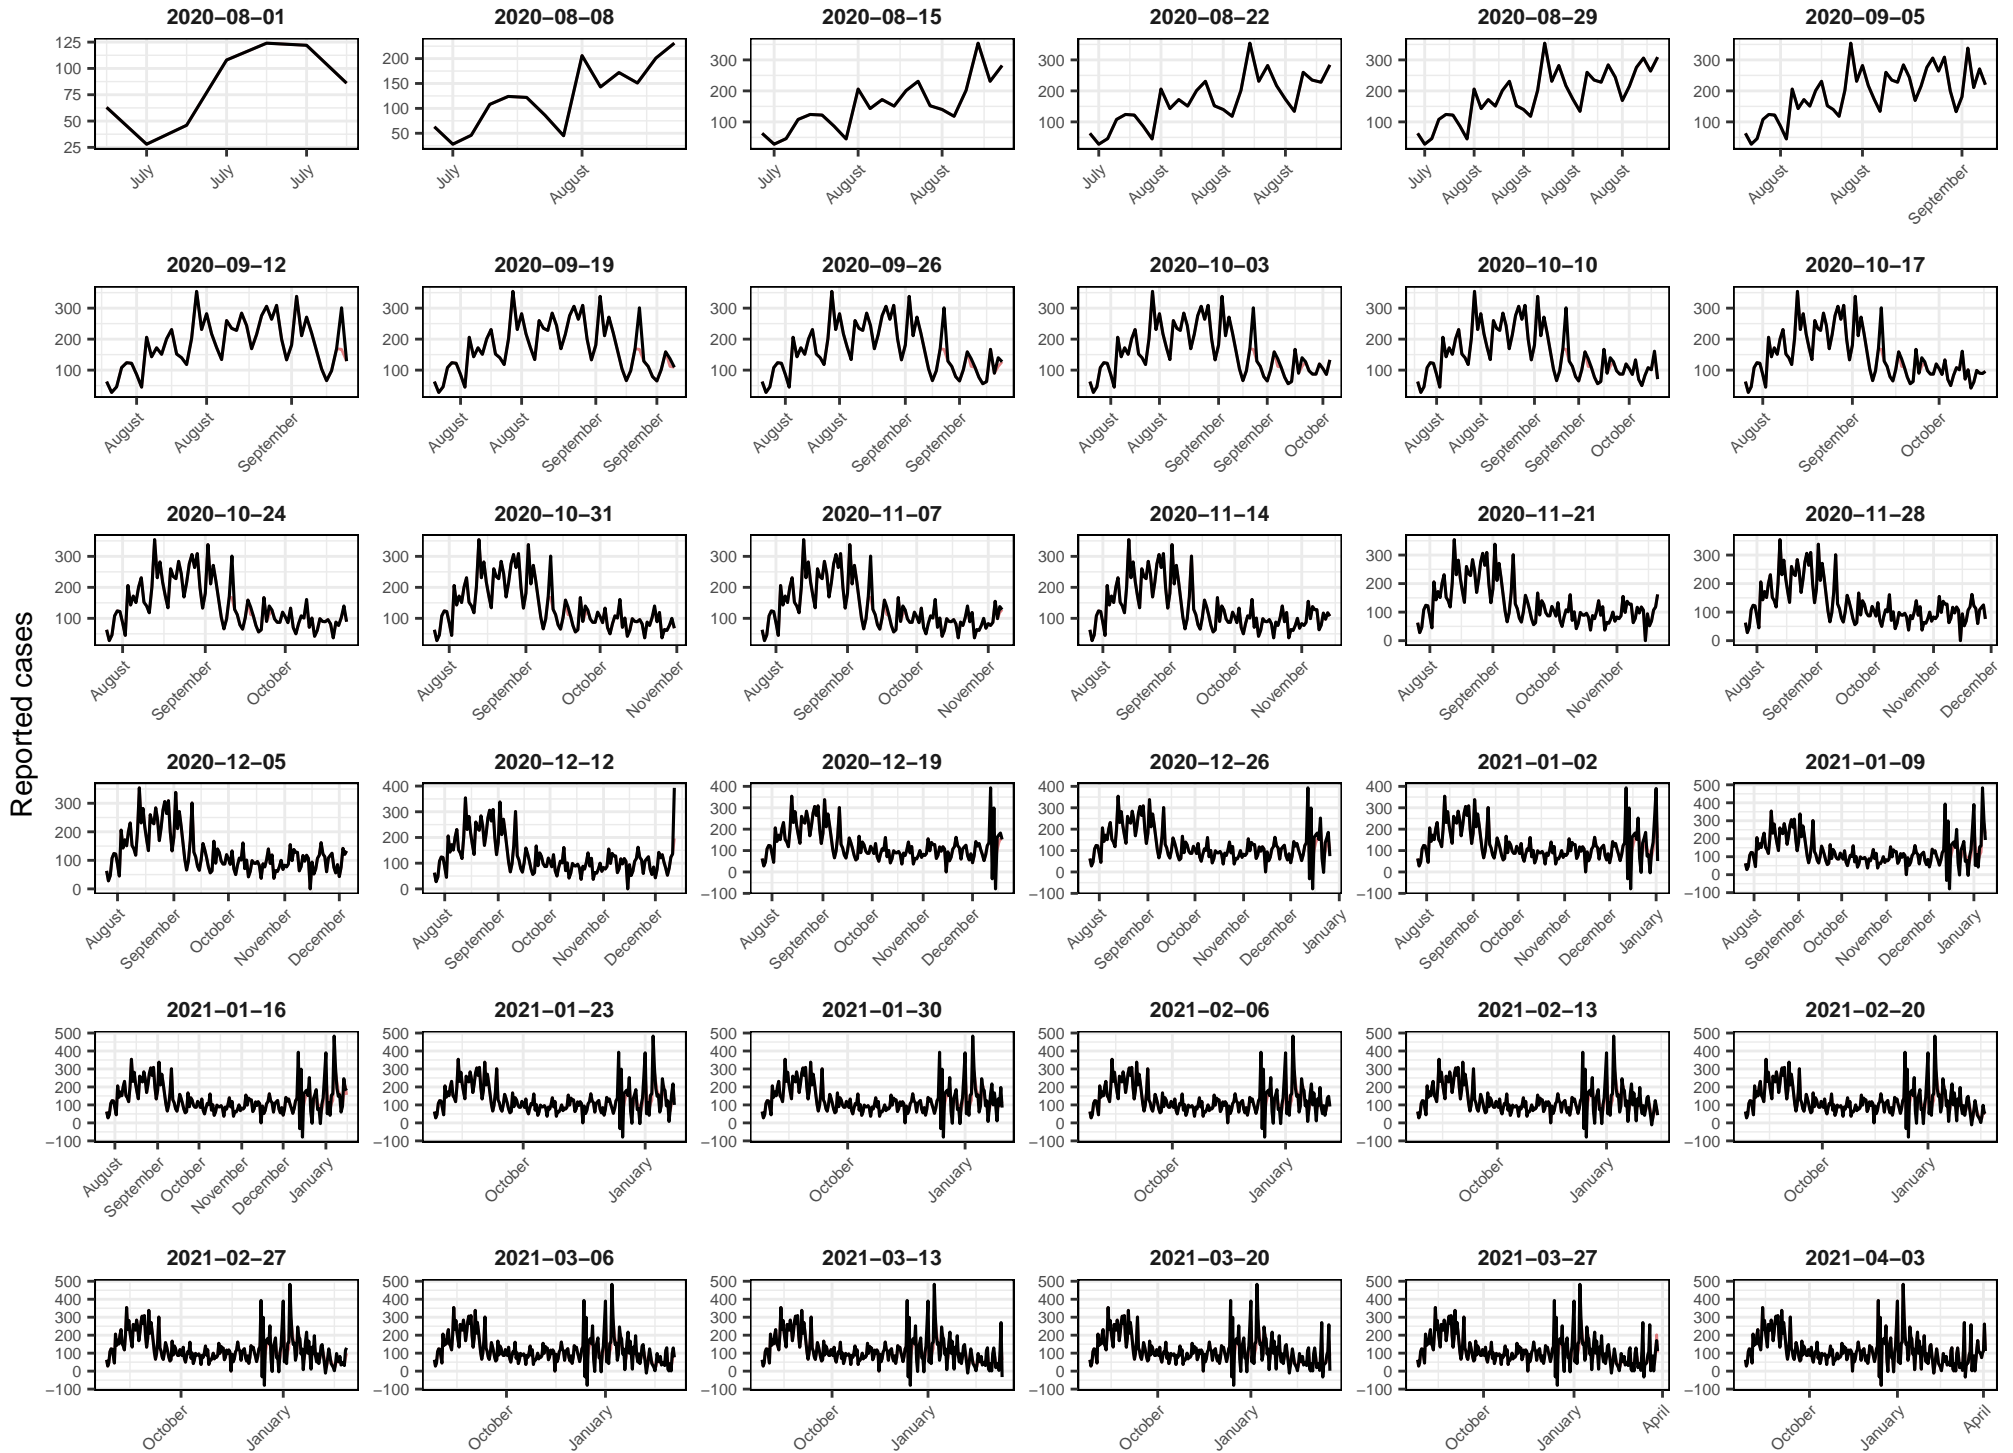

# Hawaii

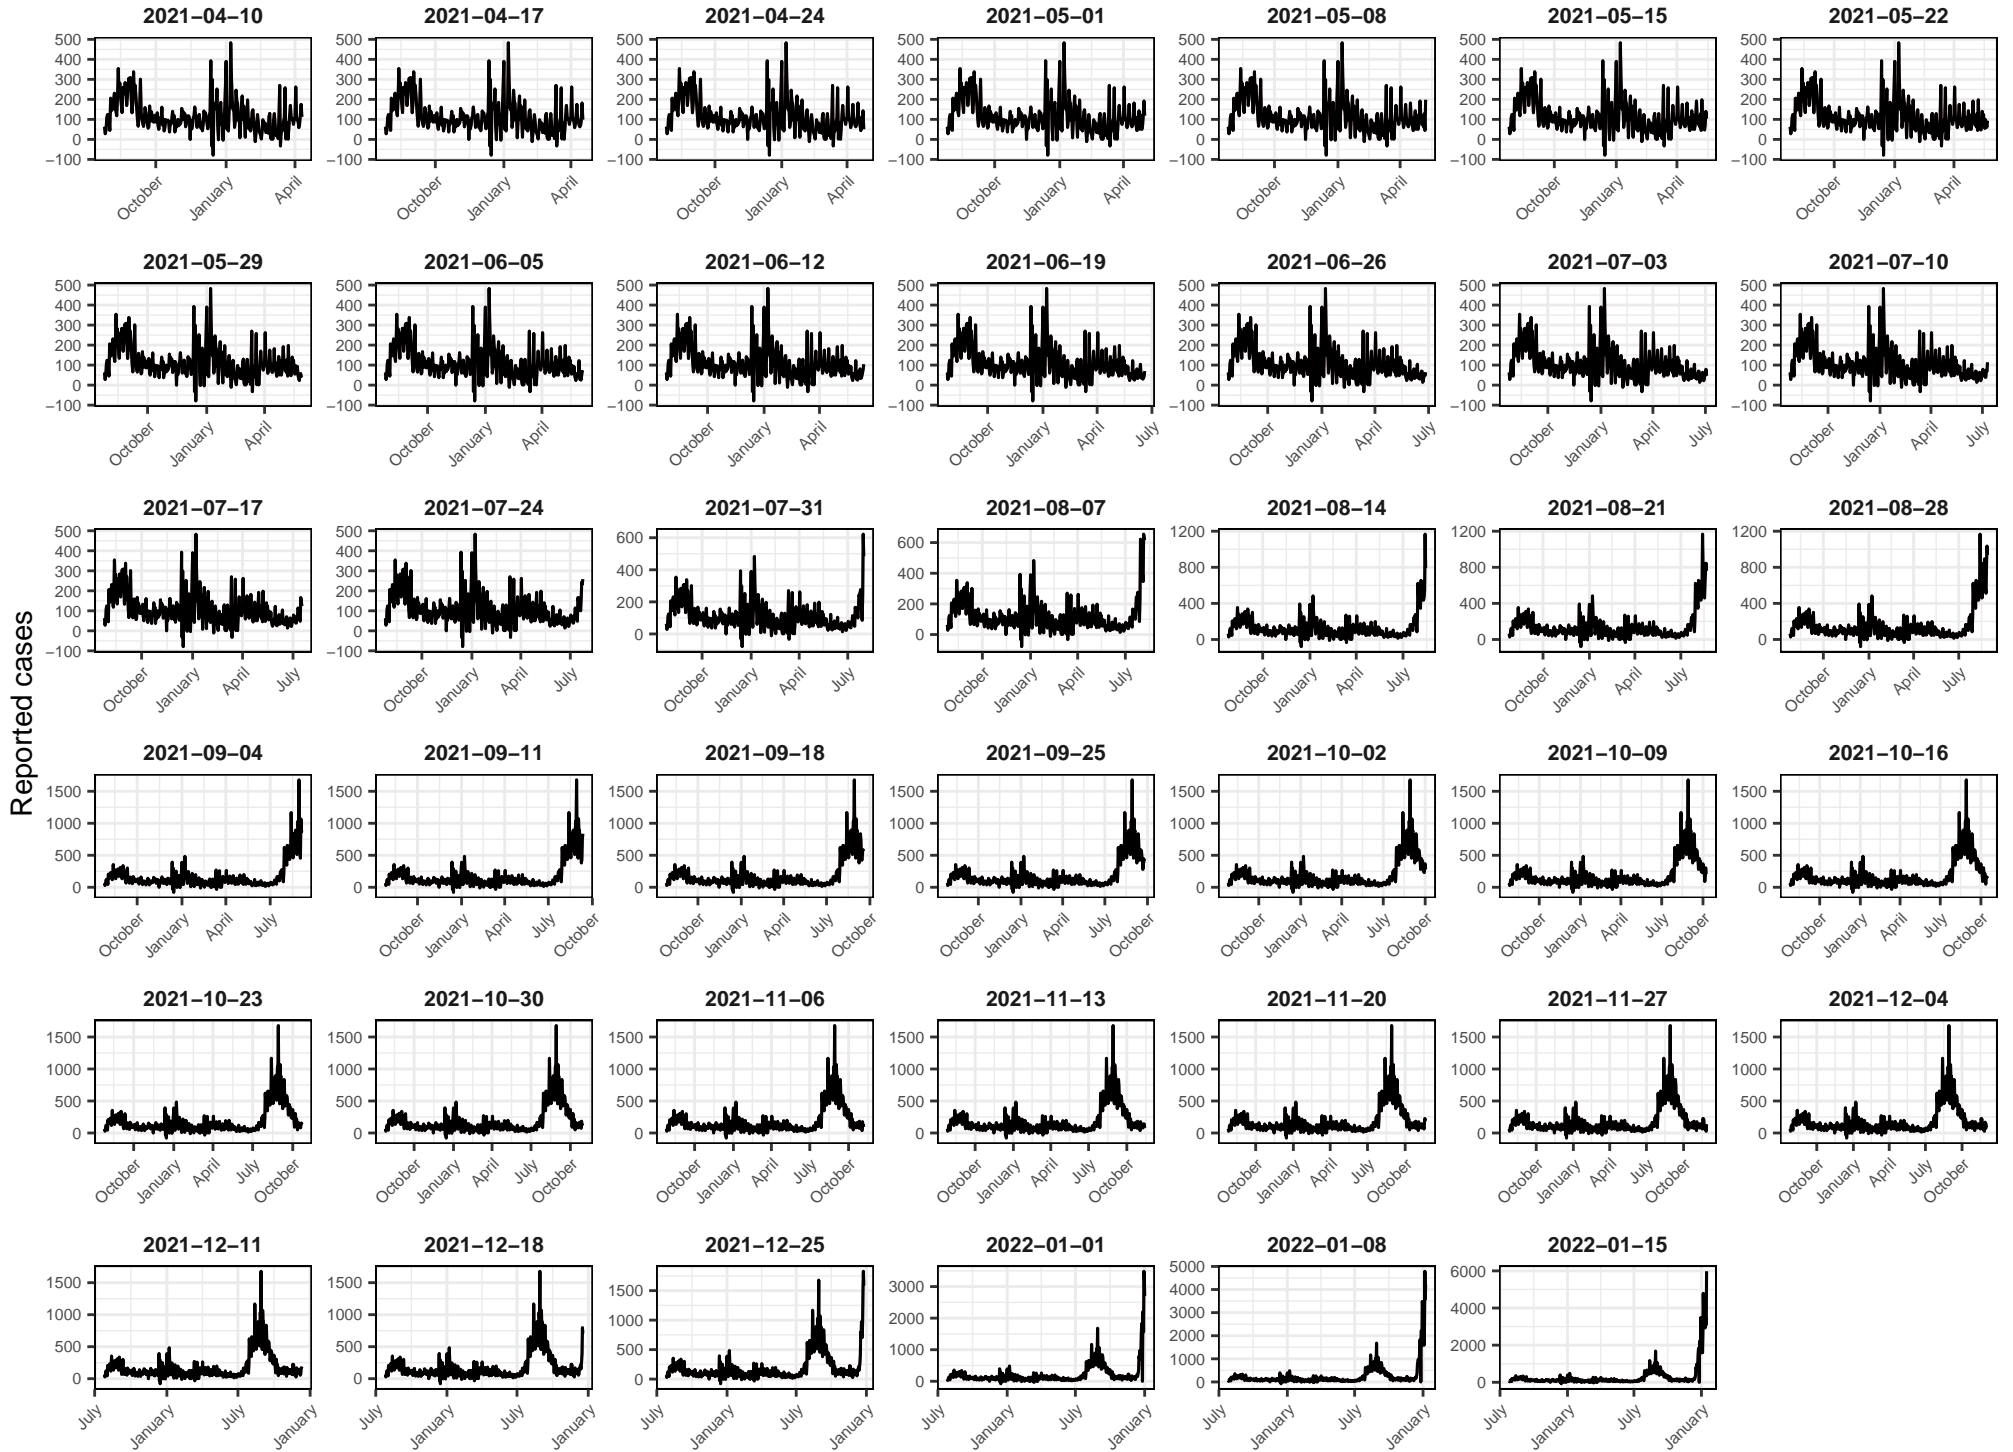



# Idaho

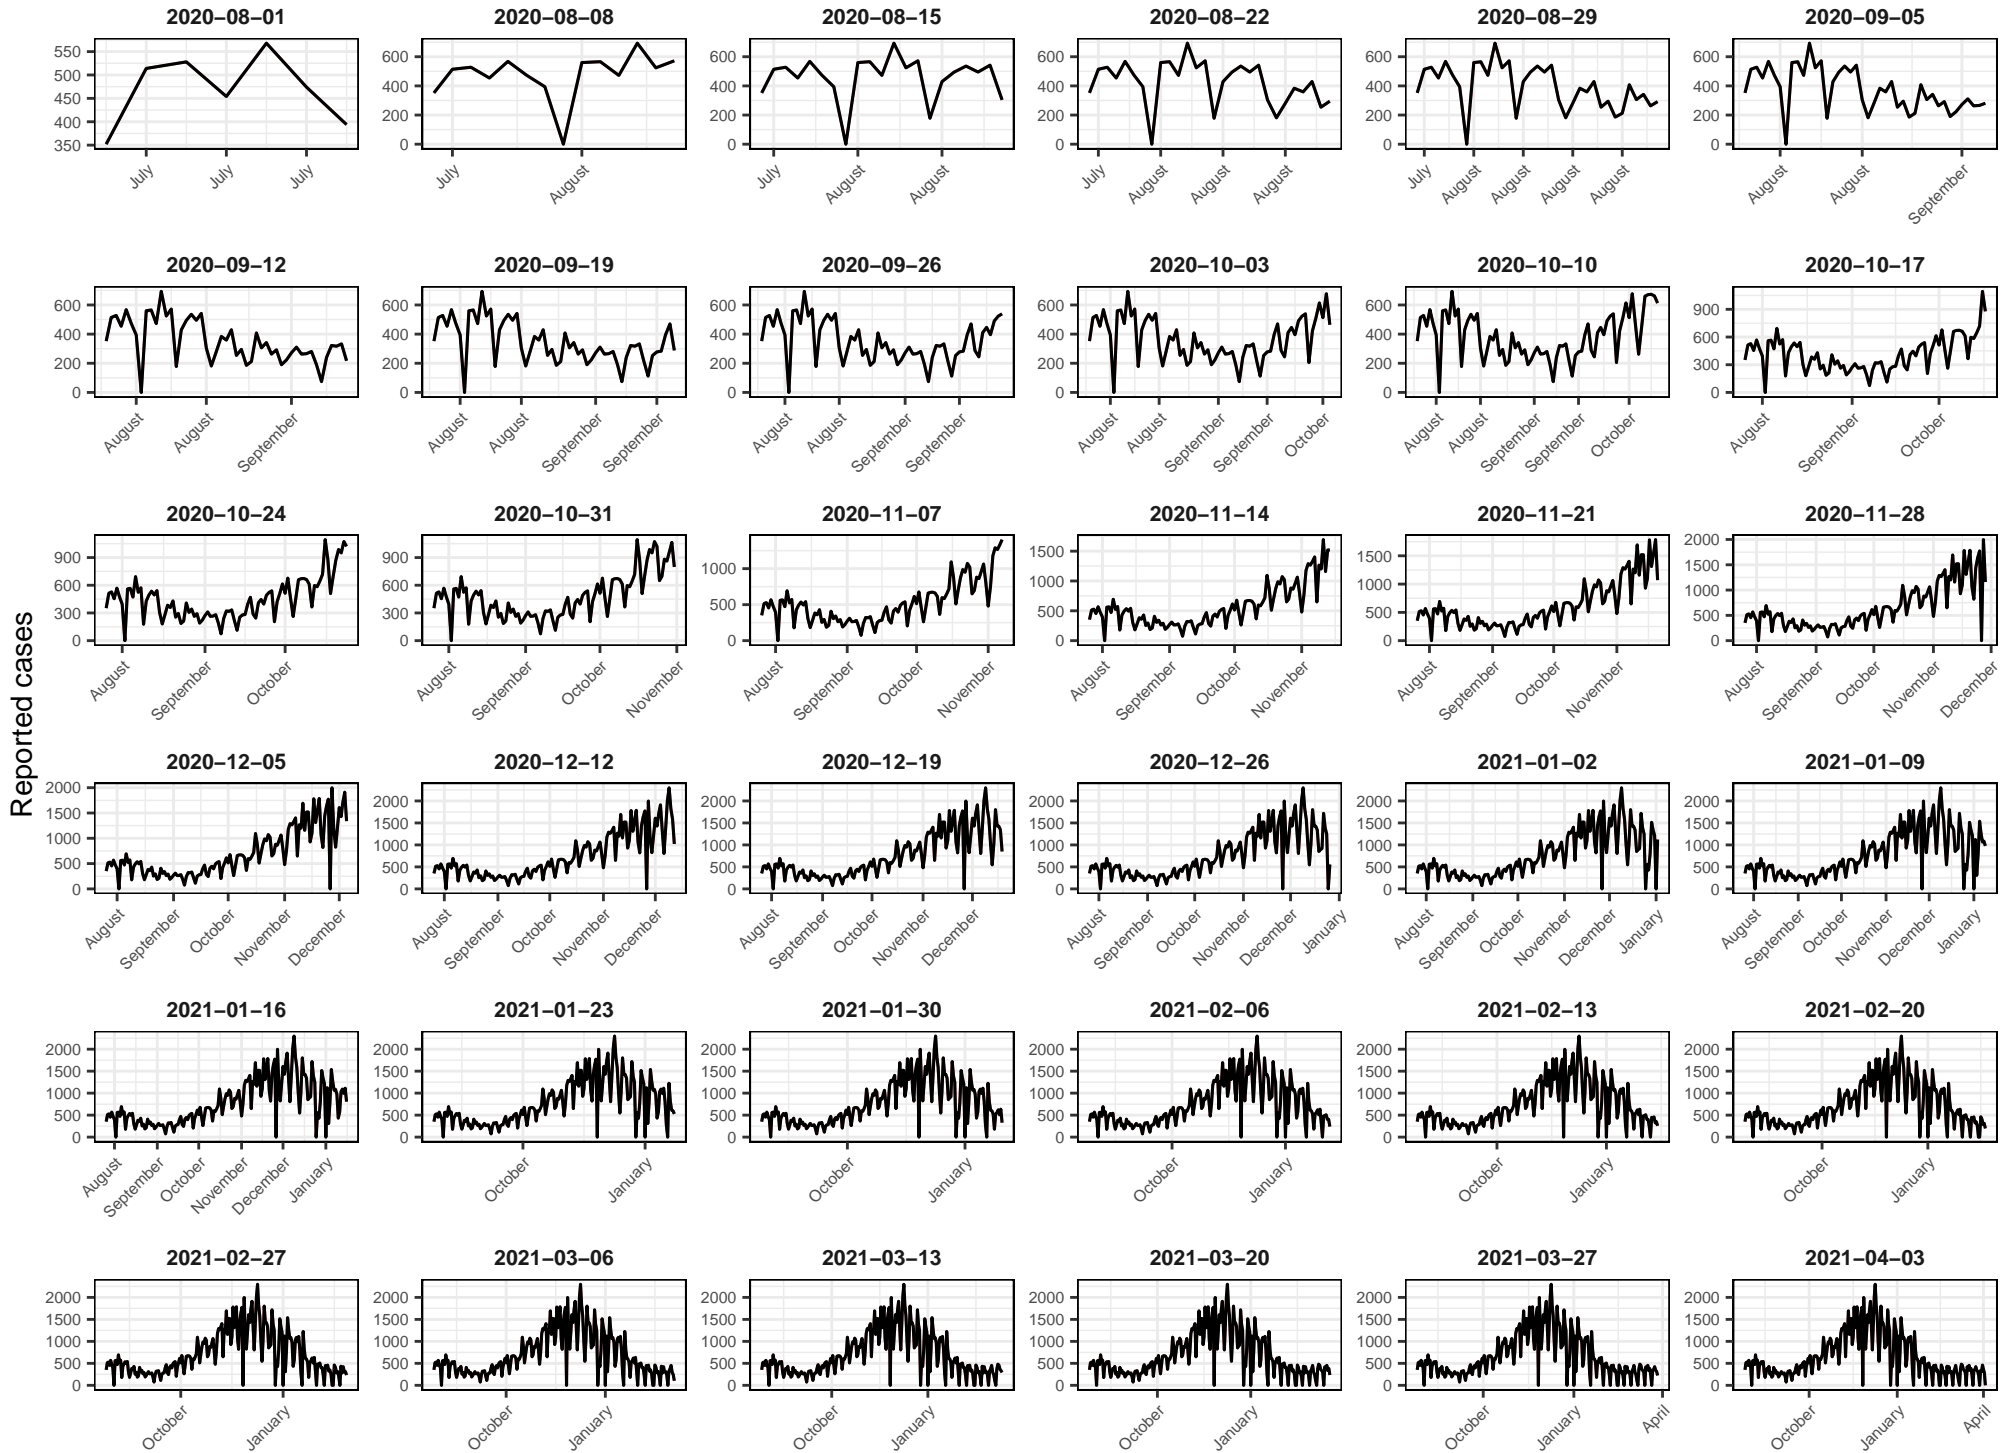

# Idaho

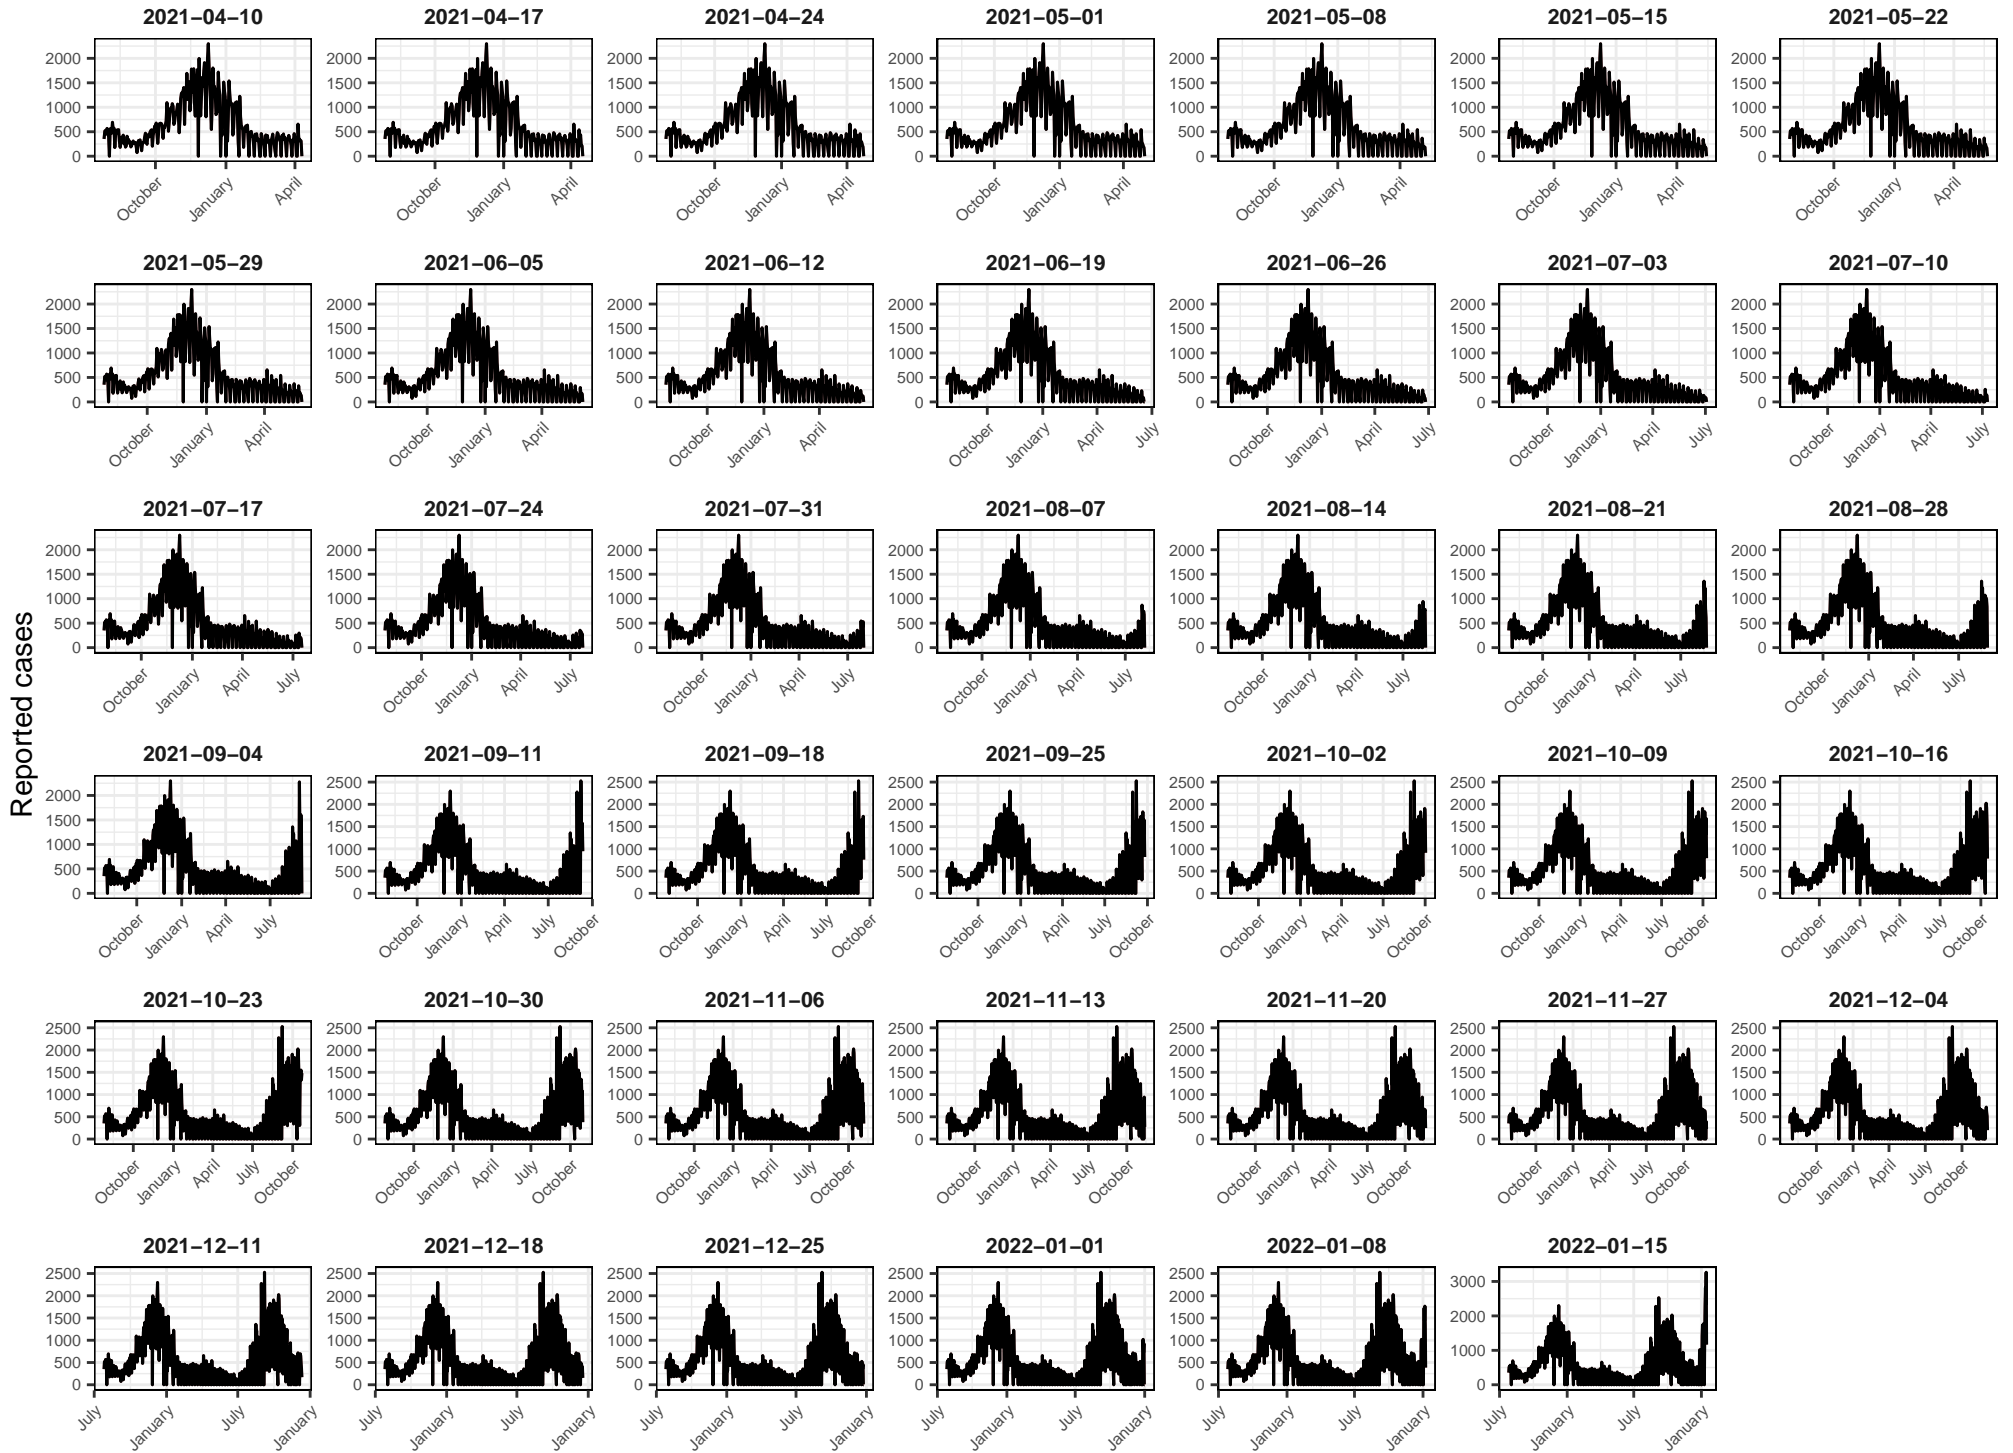

# Illinois

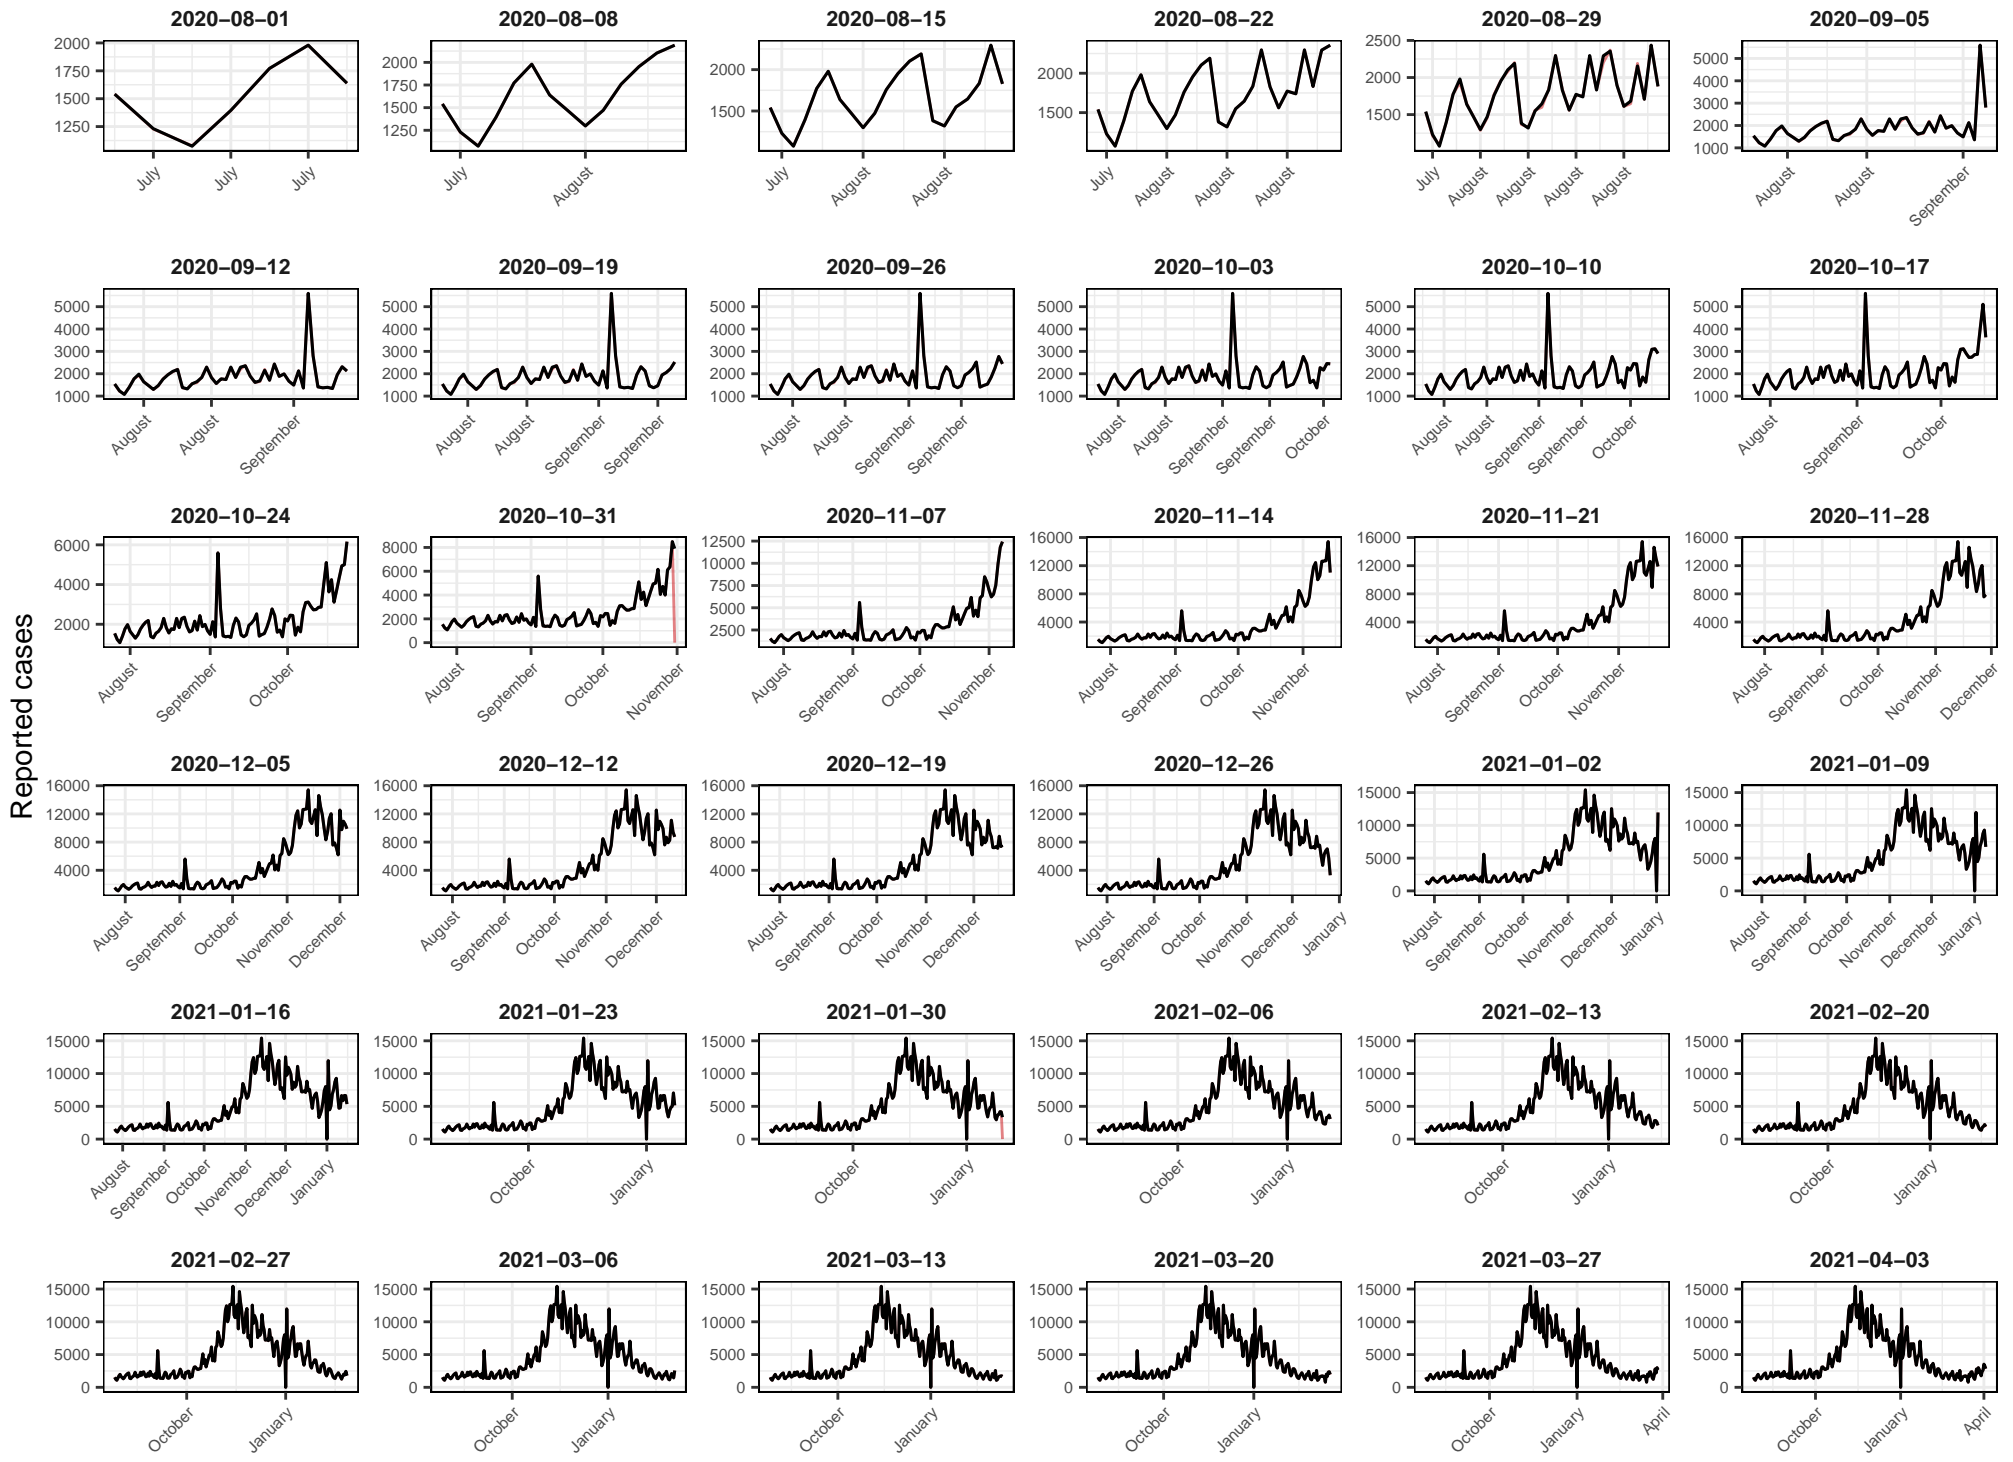

# Illinois

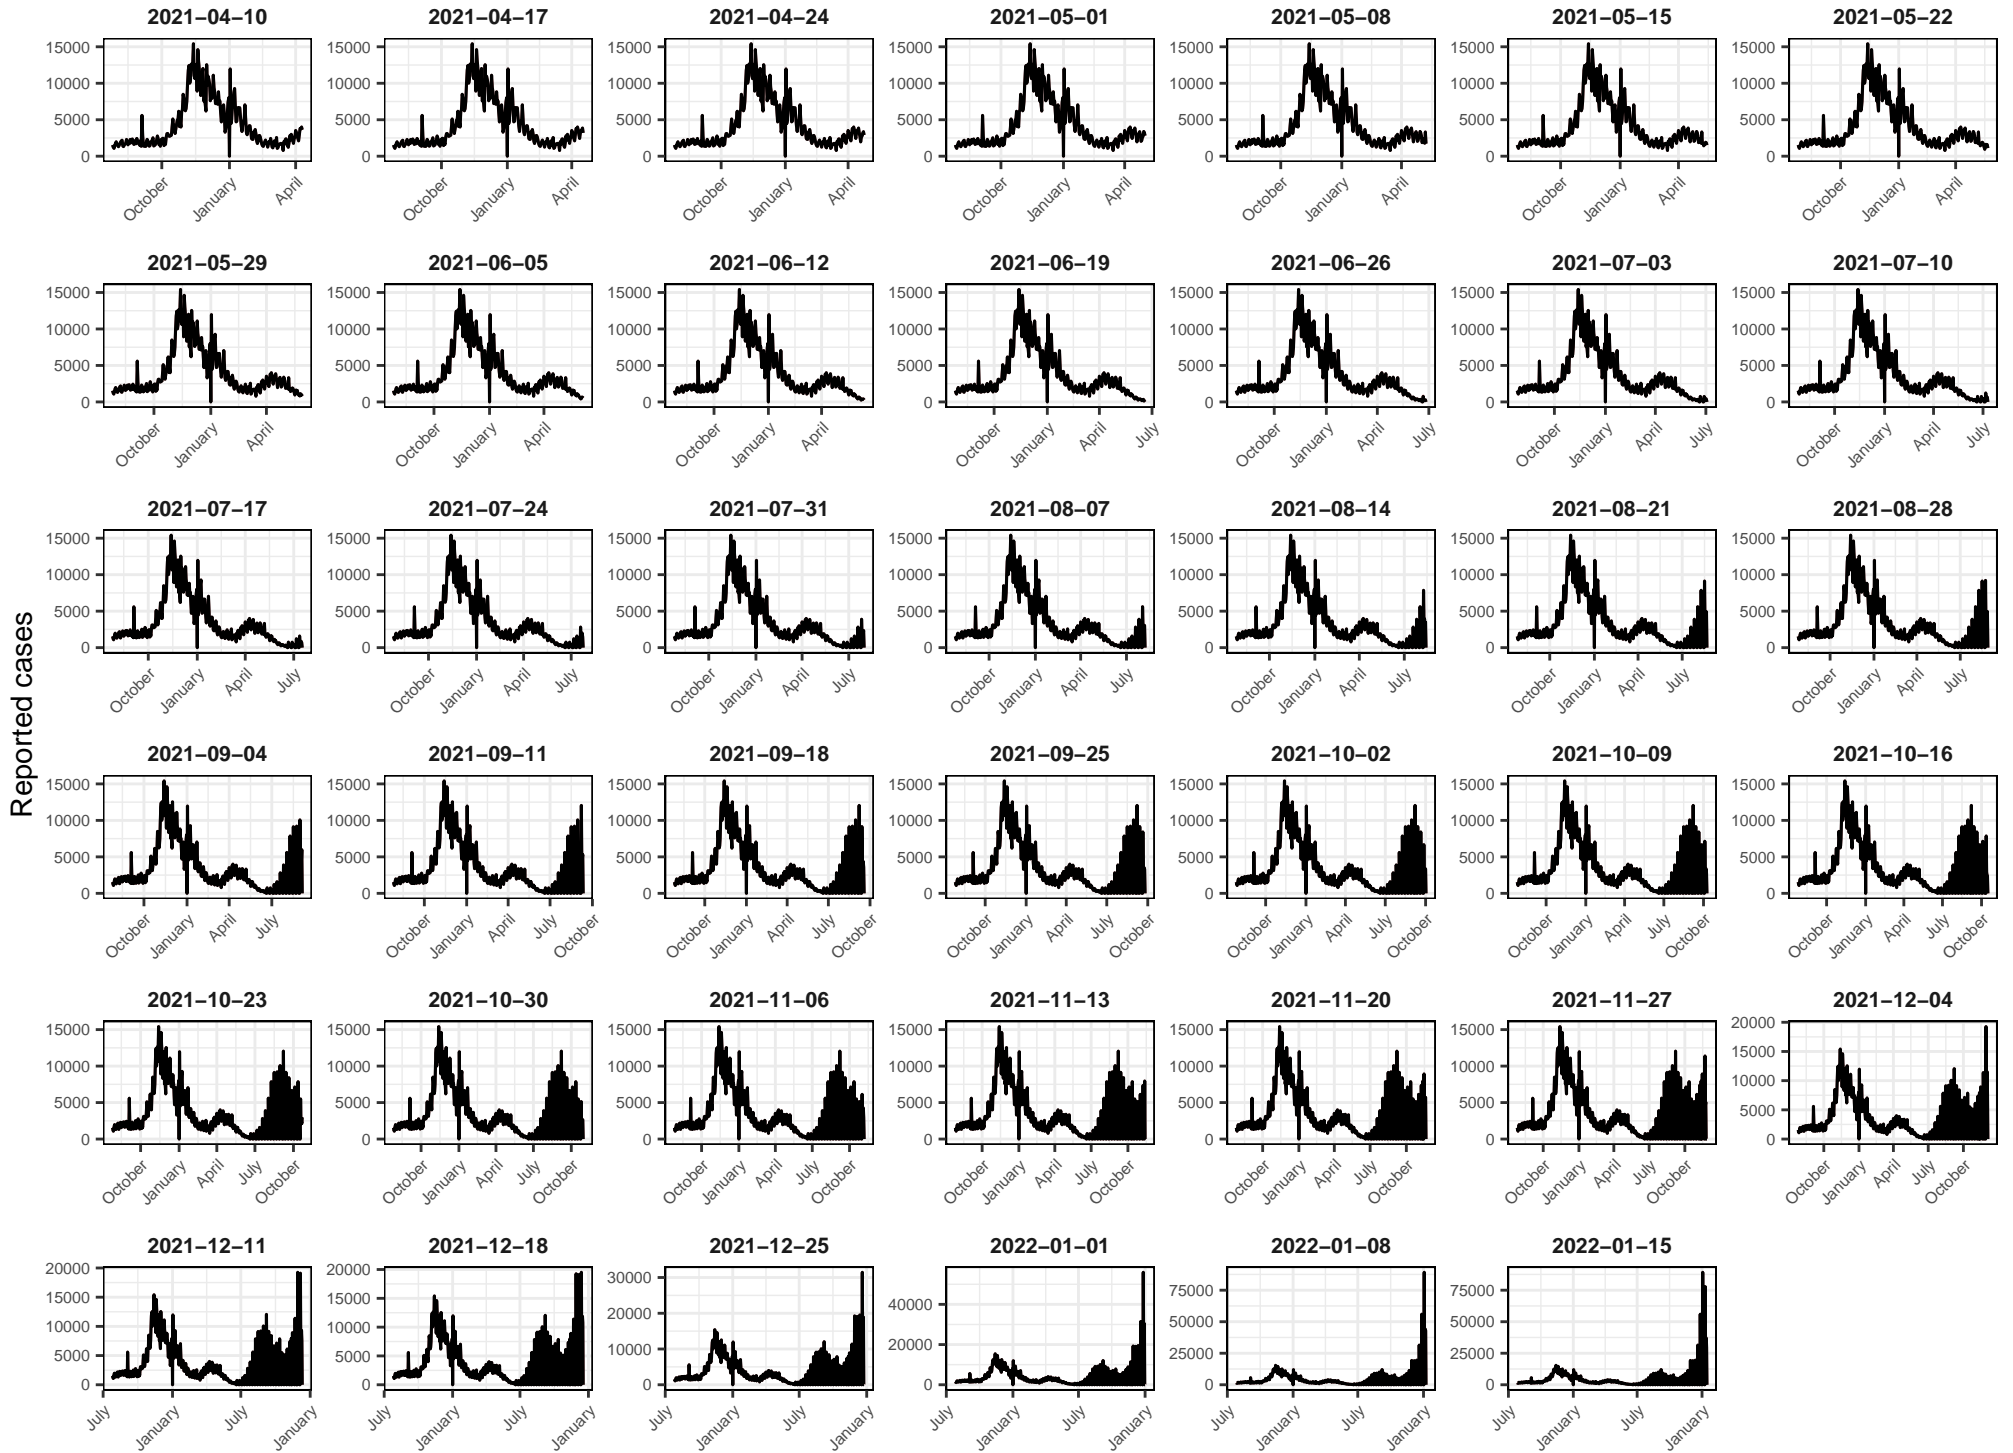

# Indiana

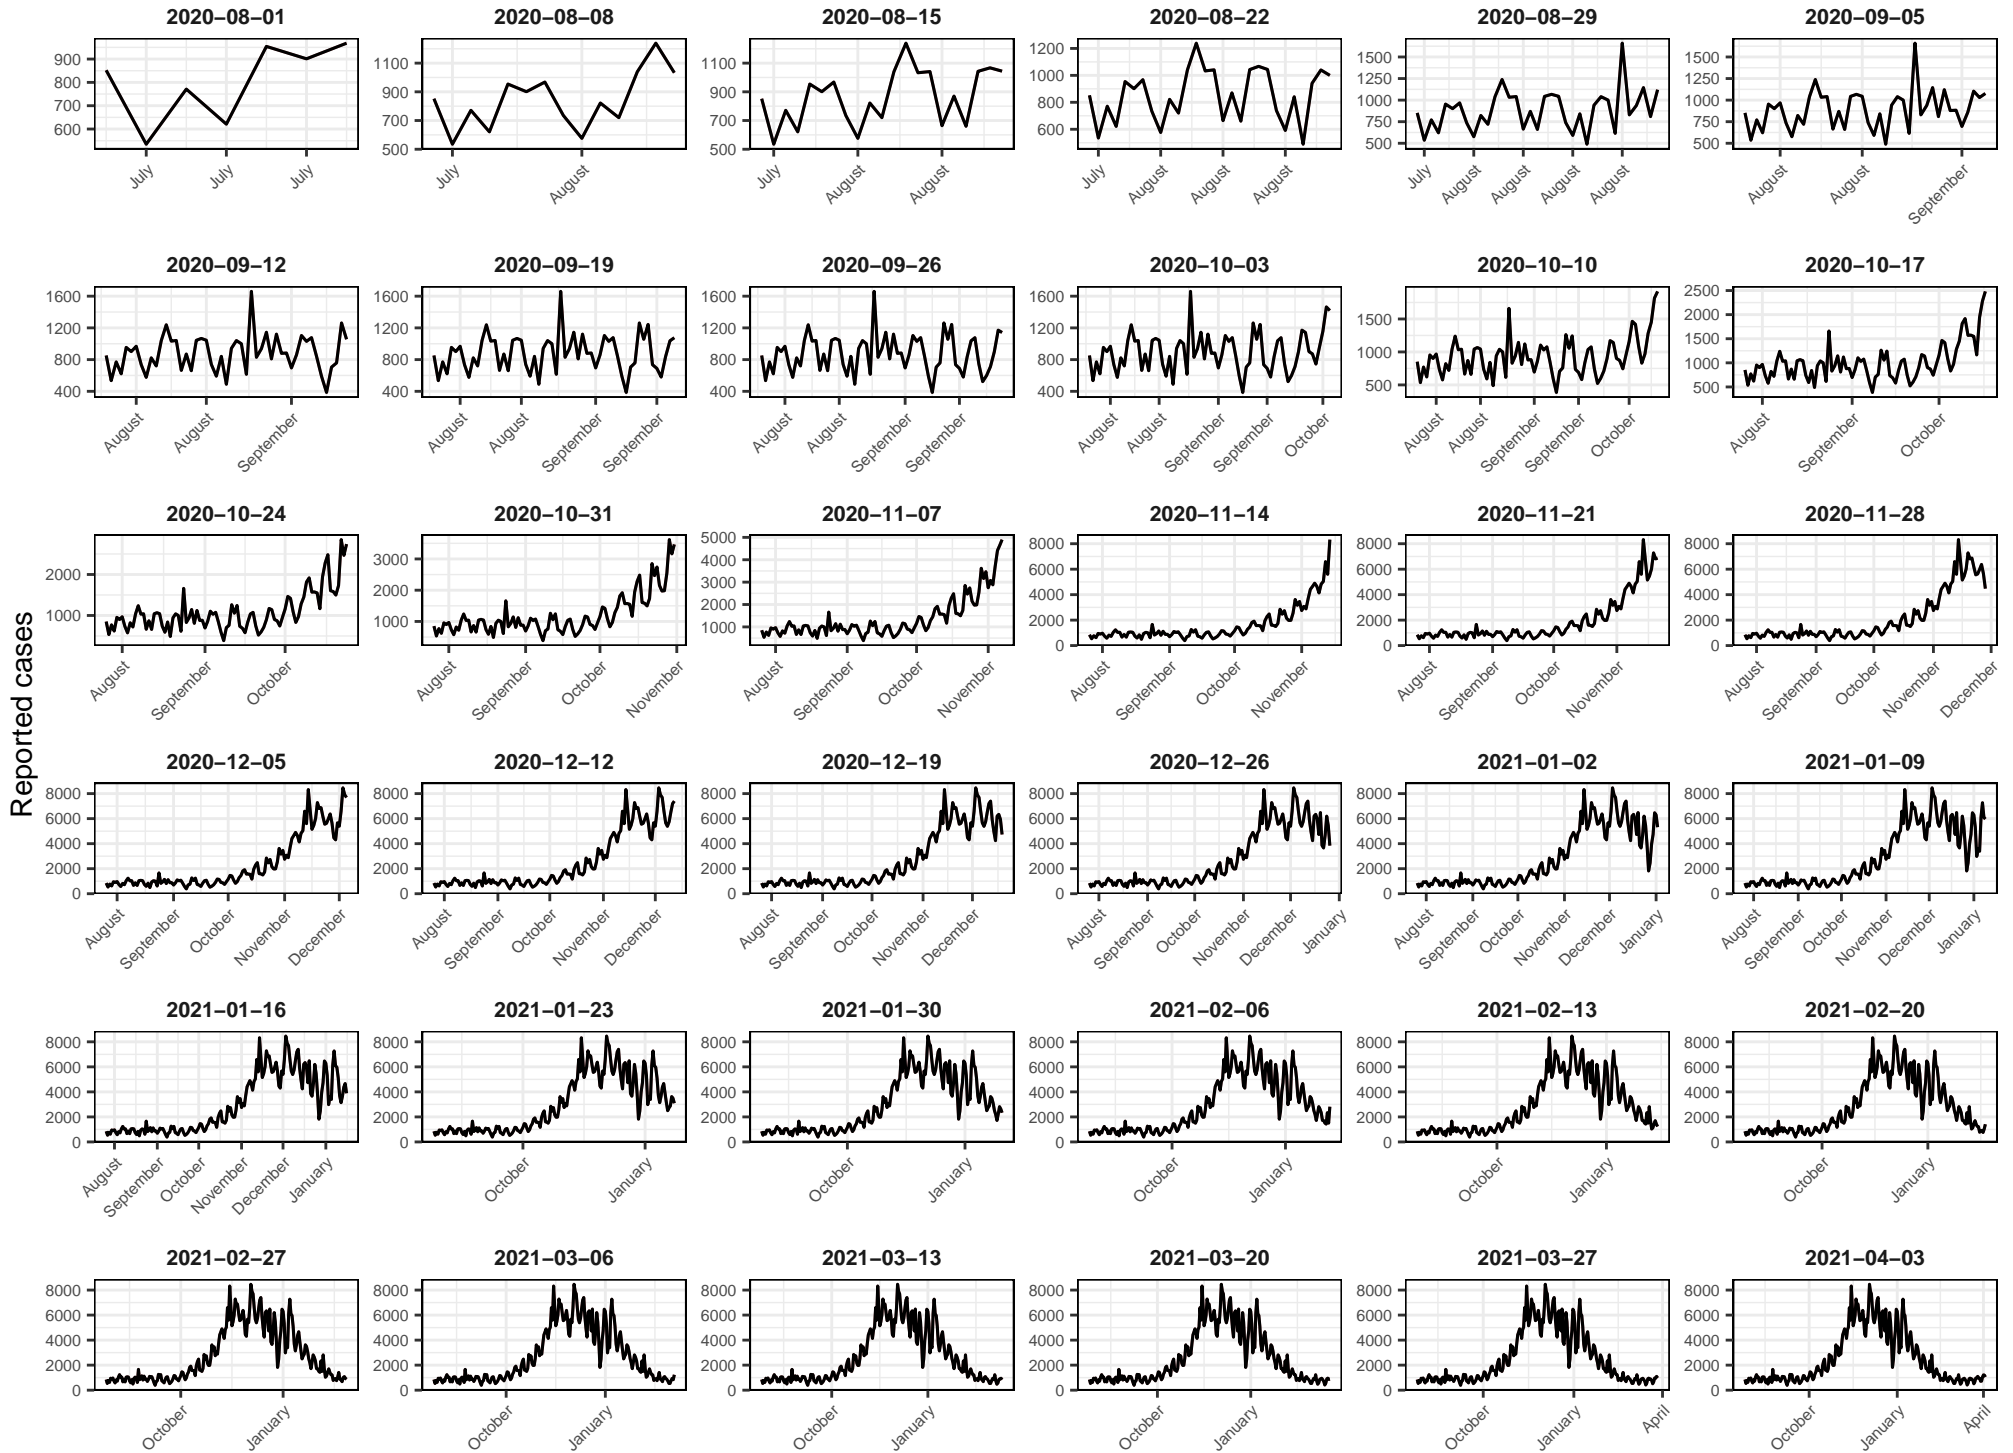

# Indiana

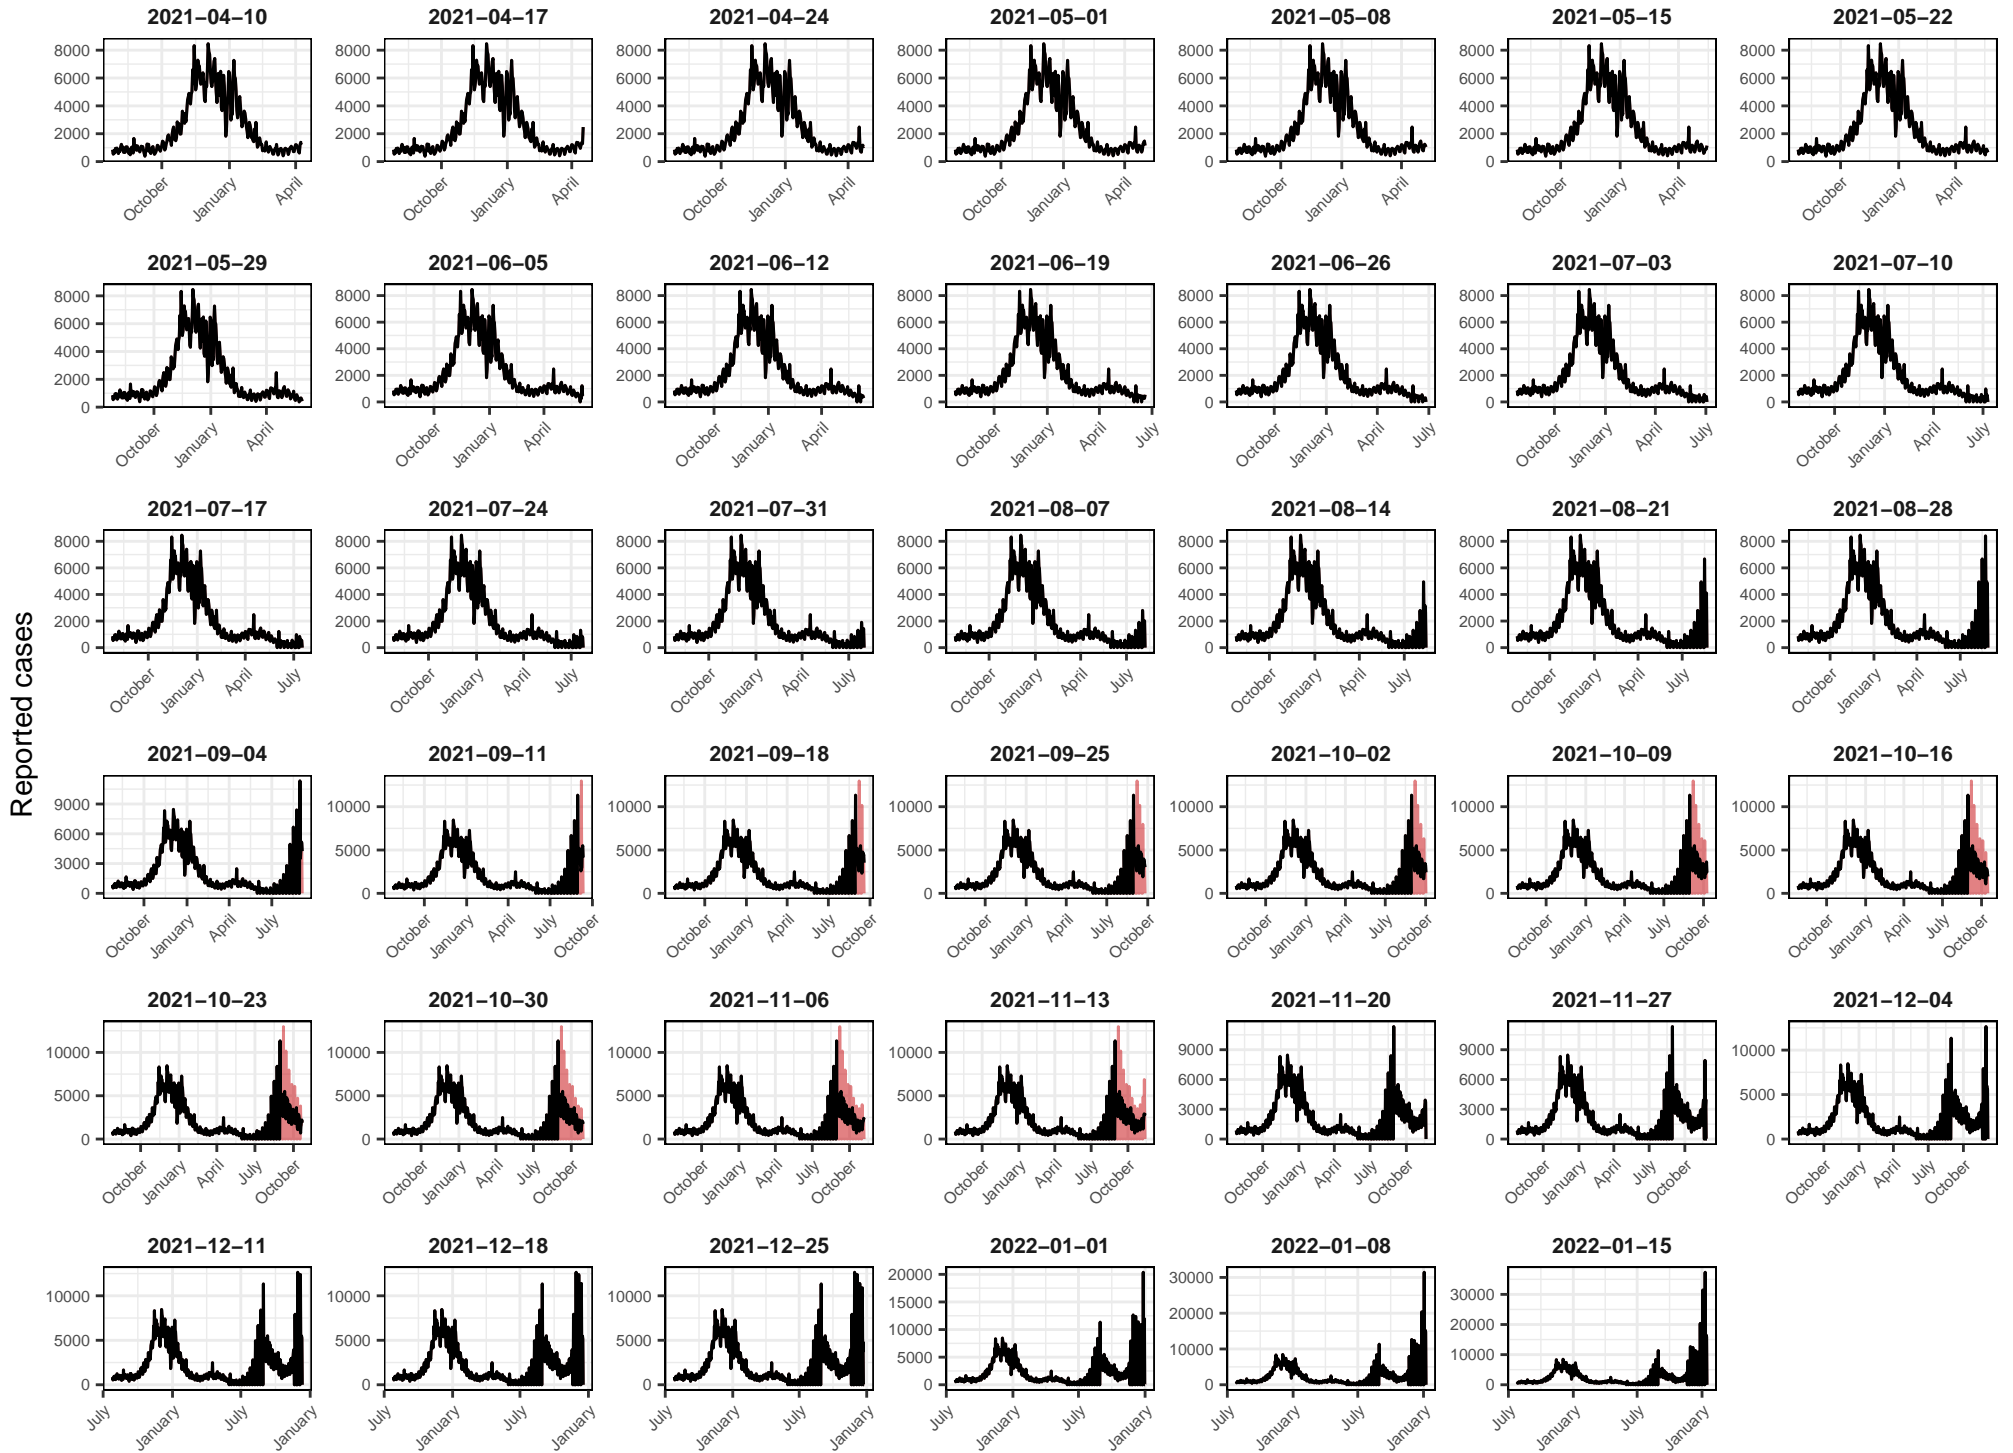

# Iowa

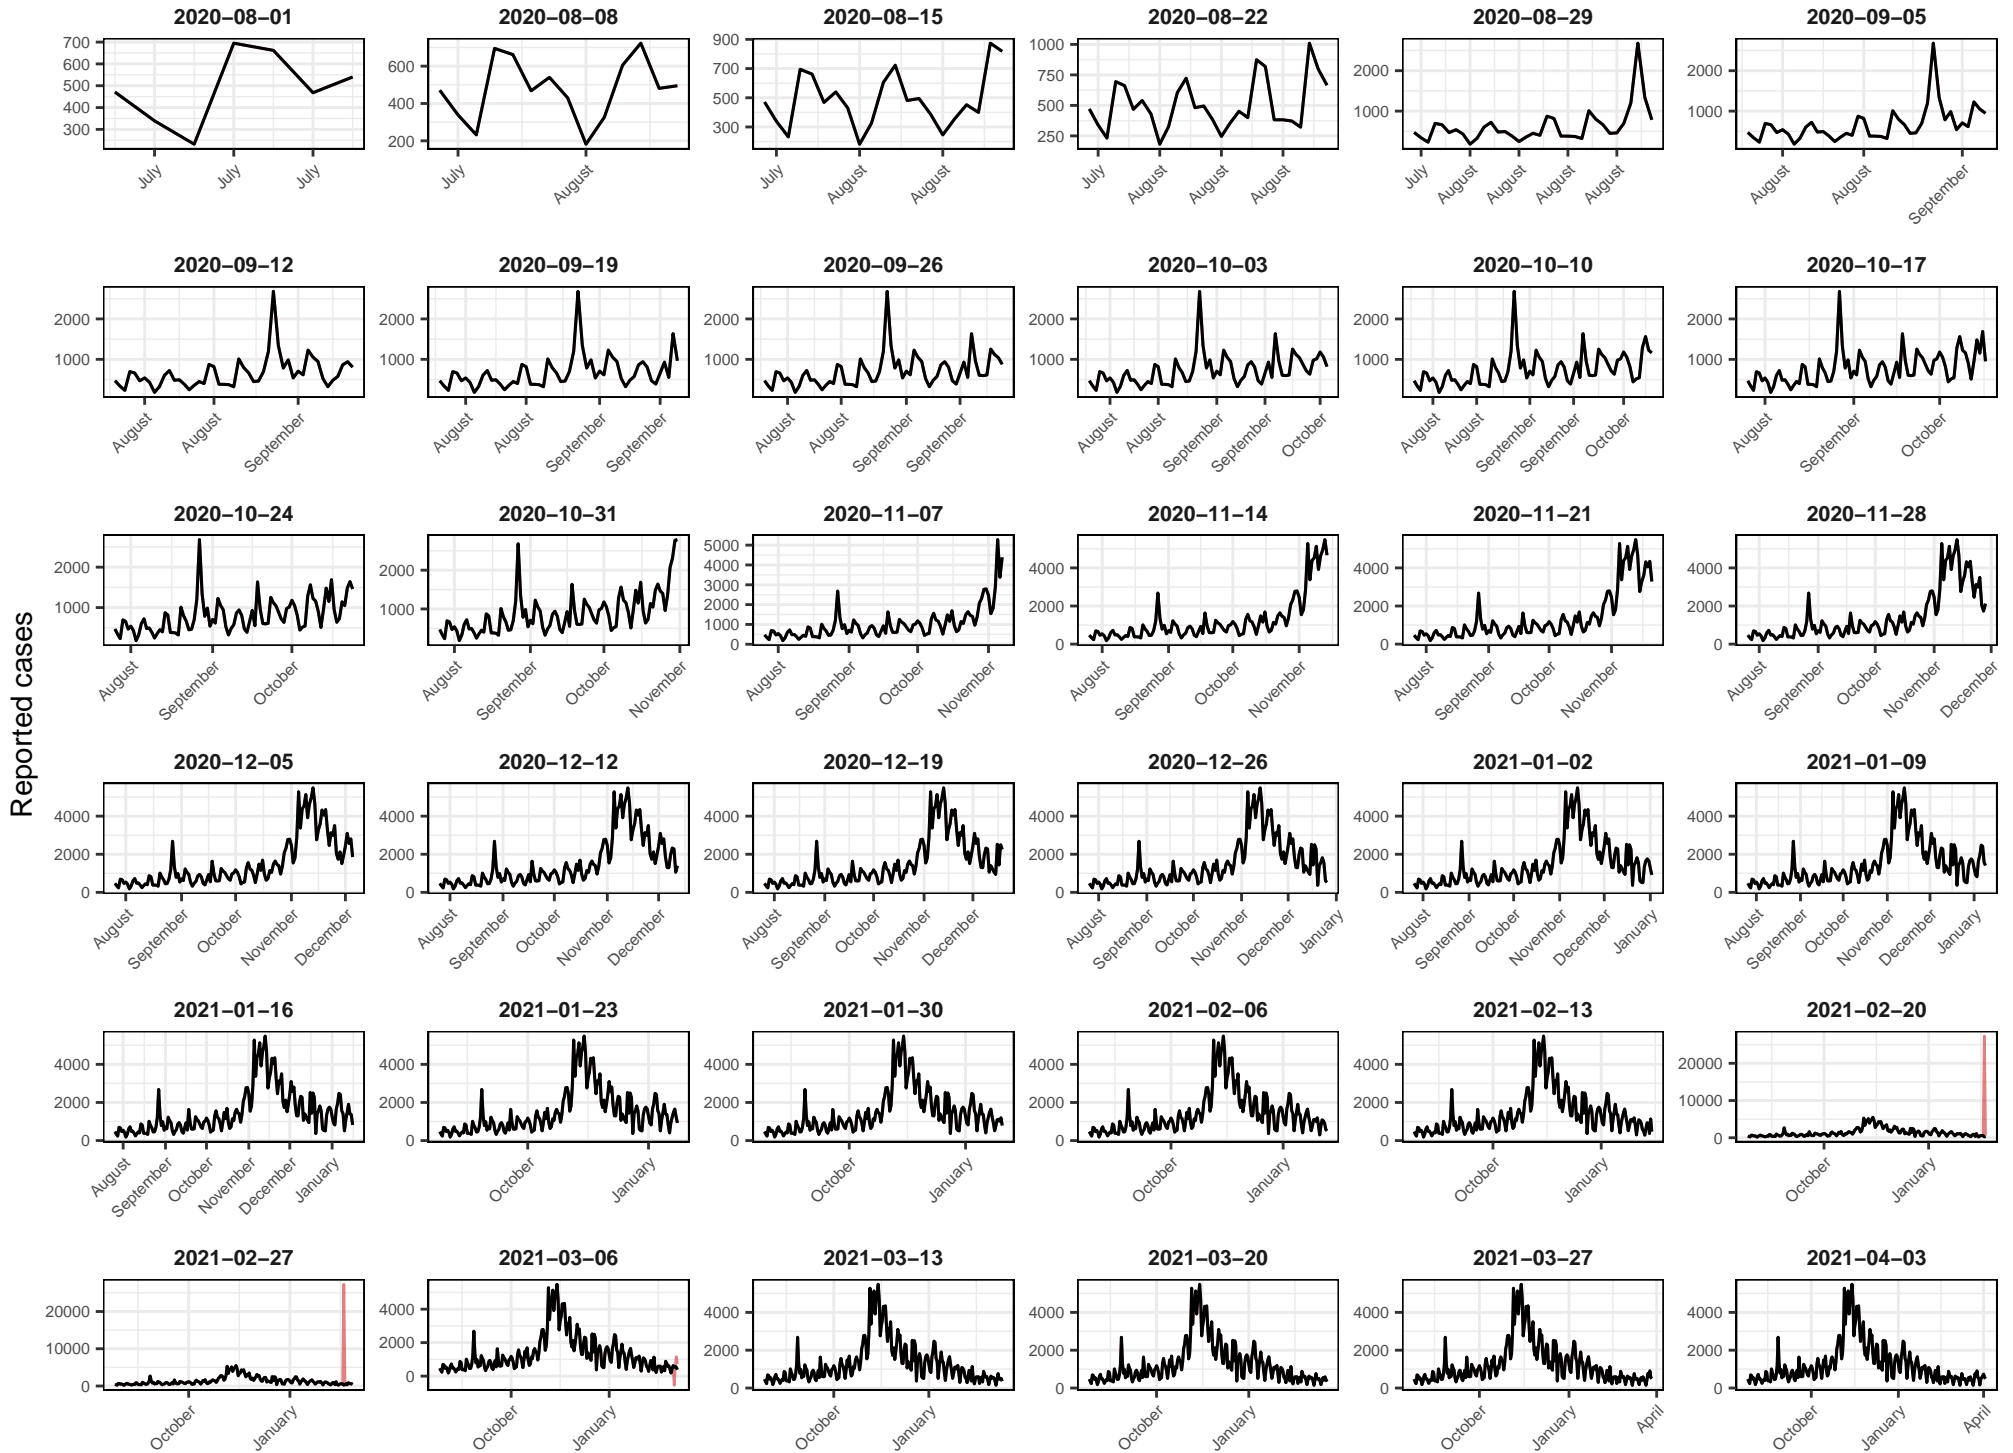

# Iowa

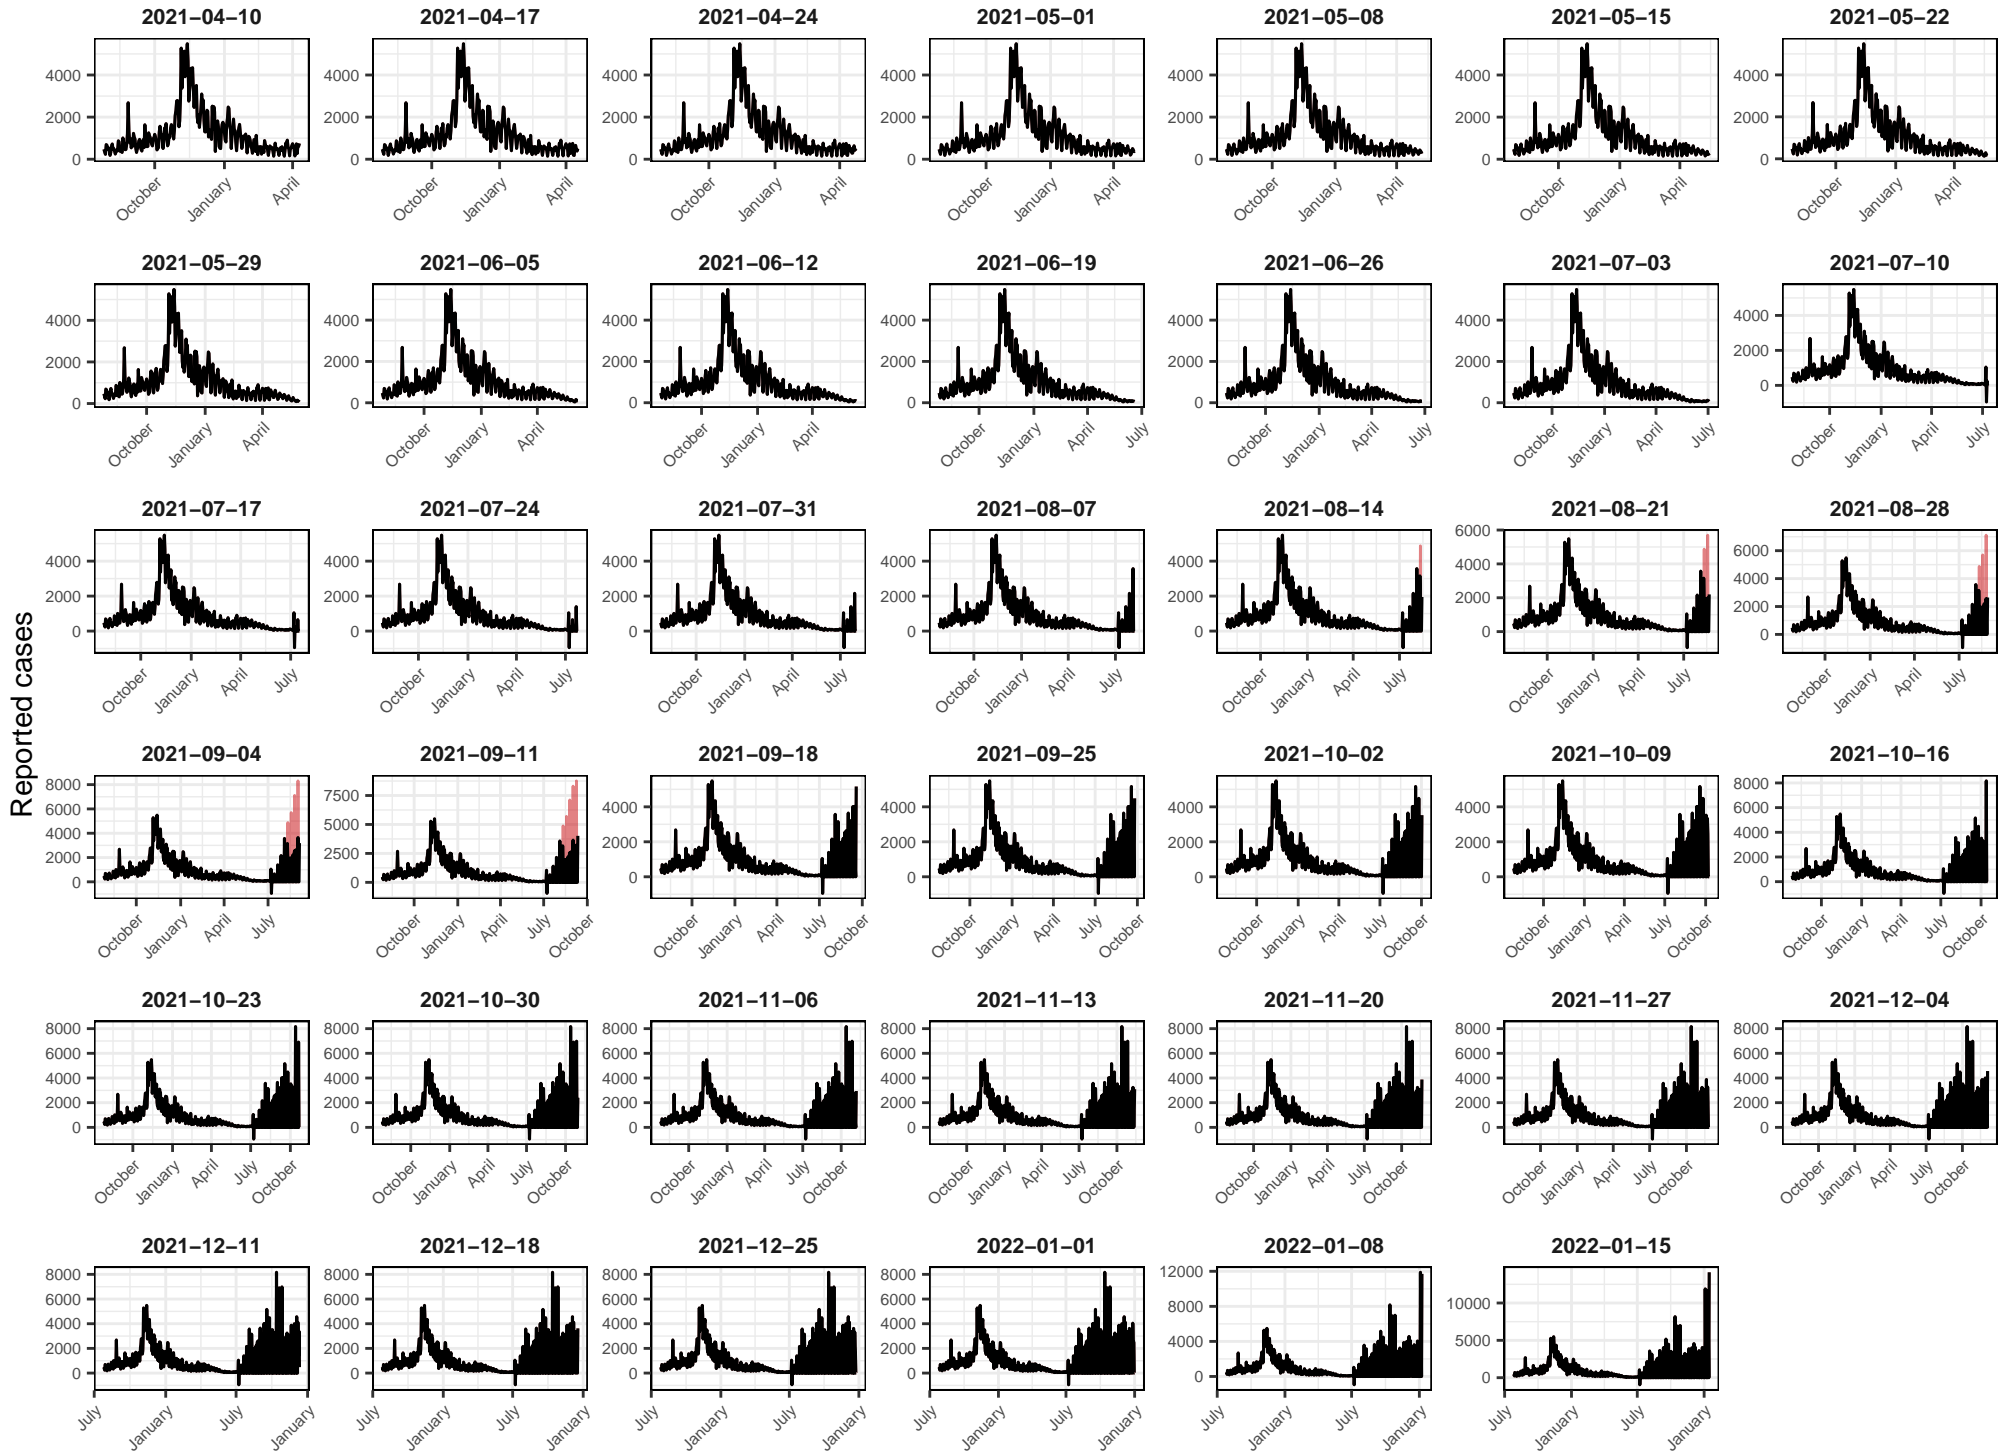



# Kansas

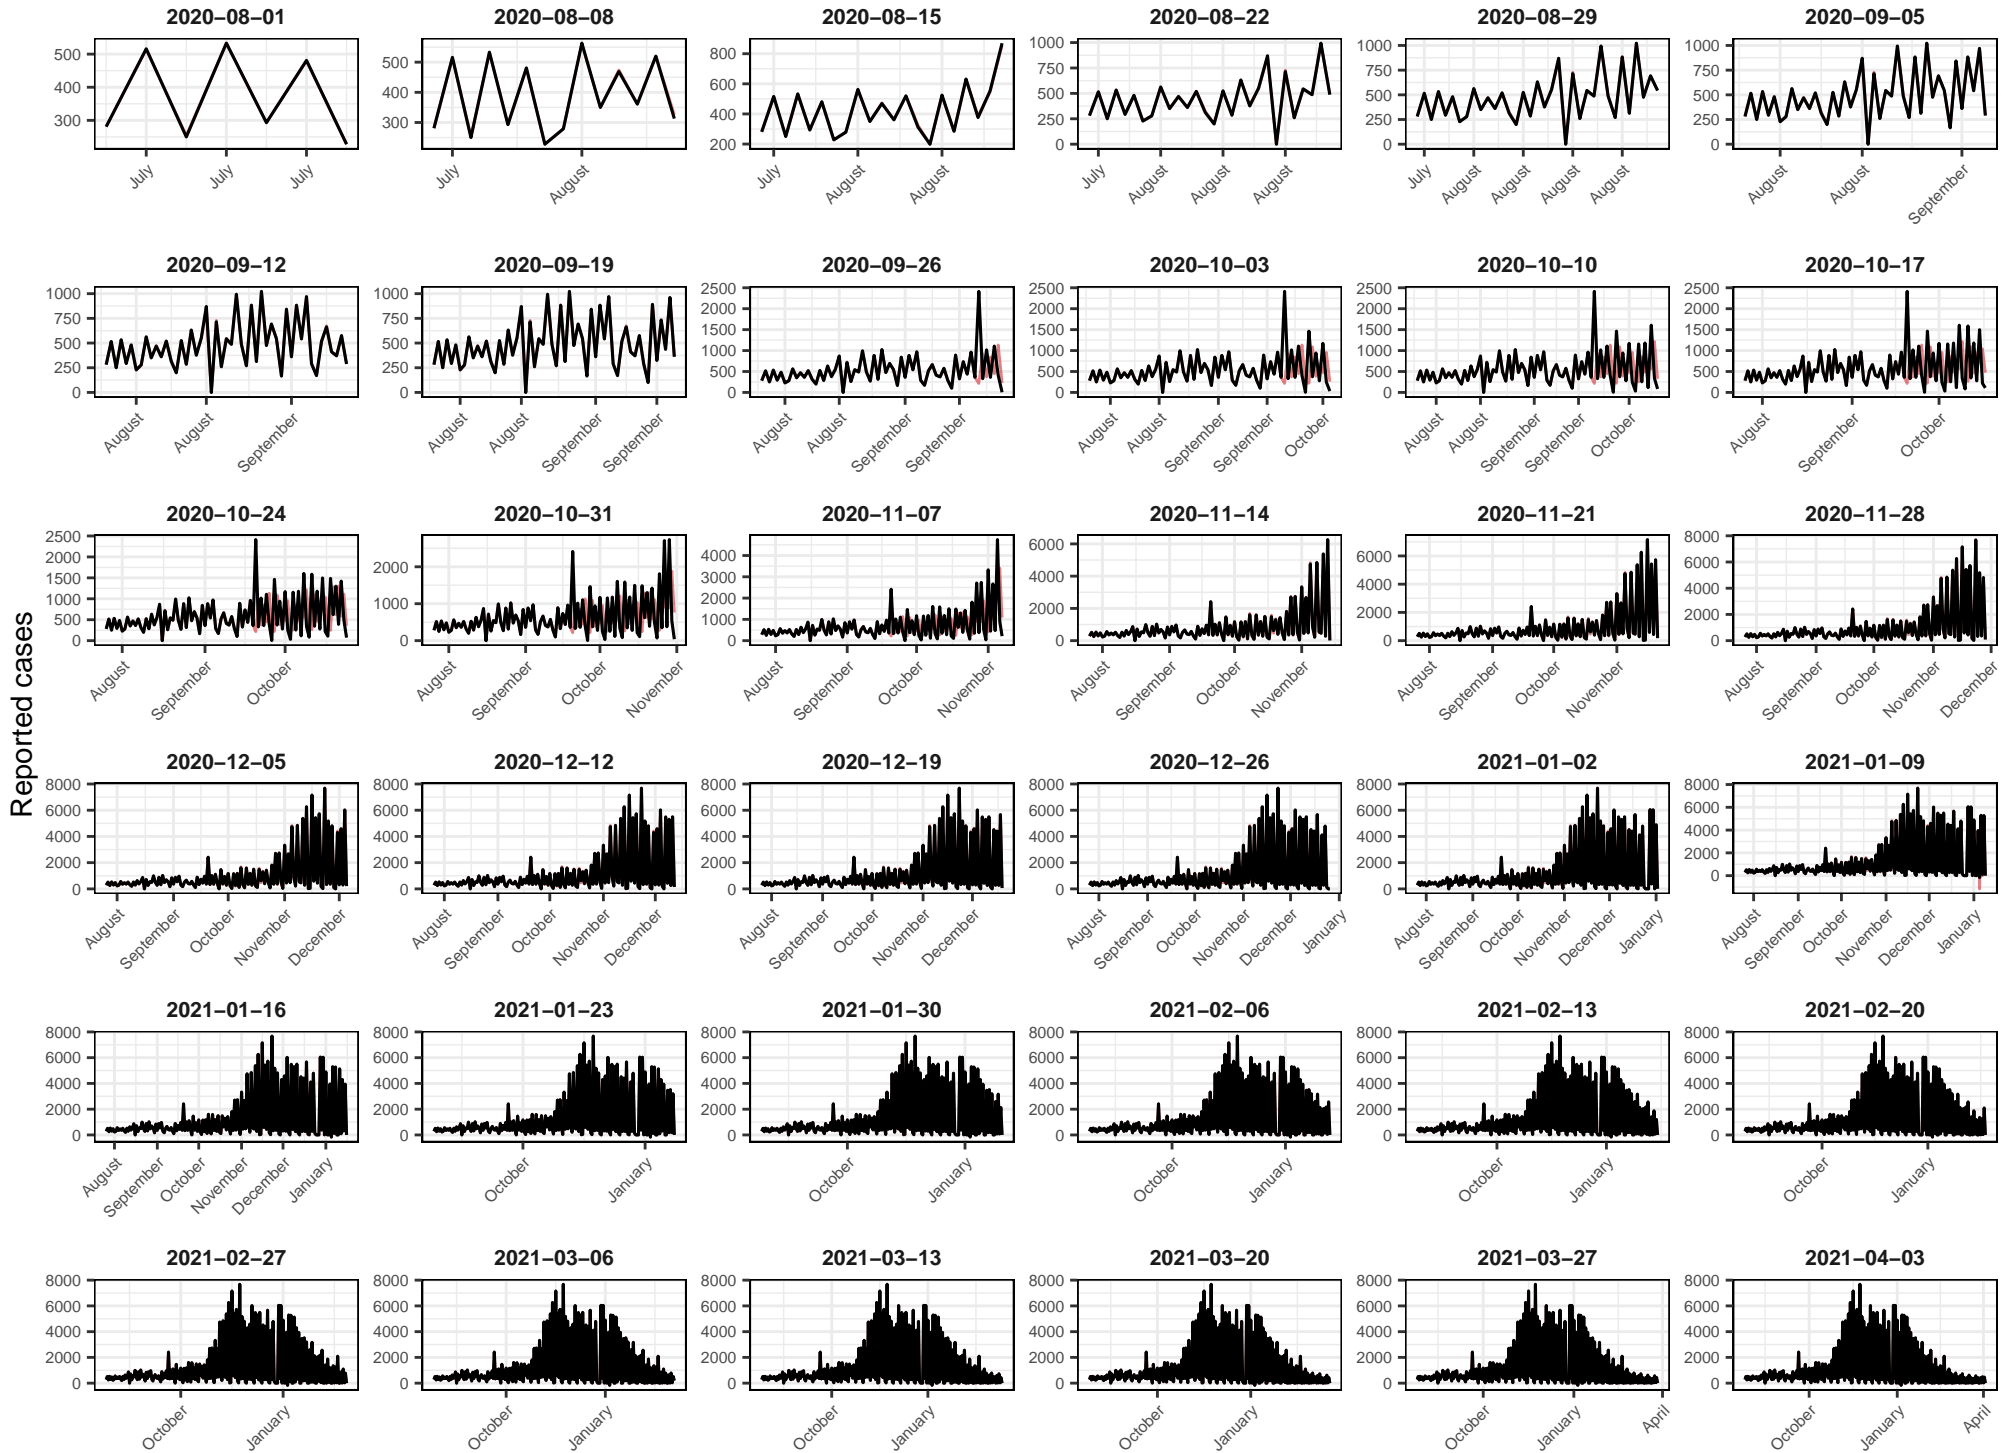

# Kansas

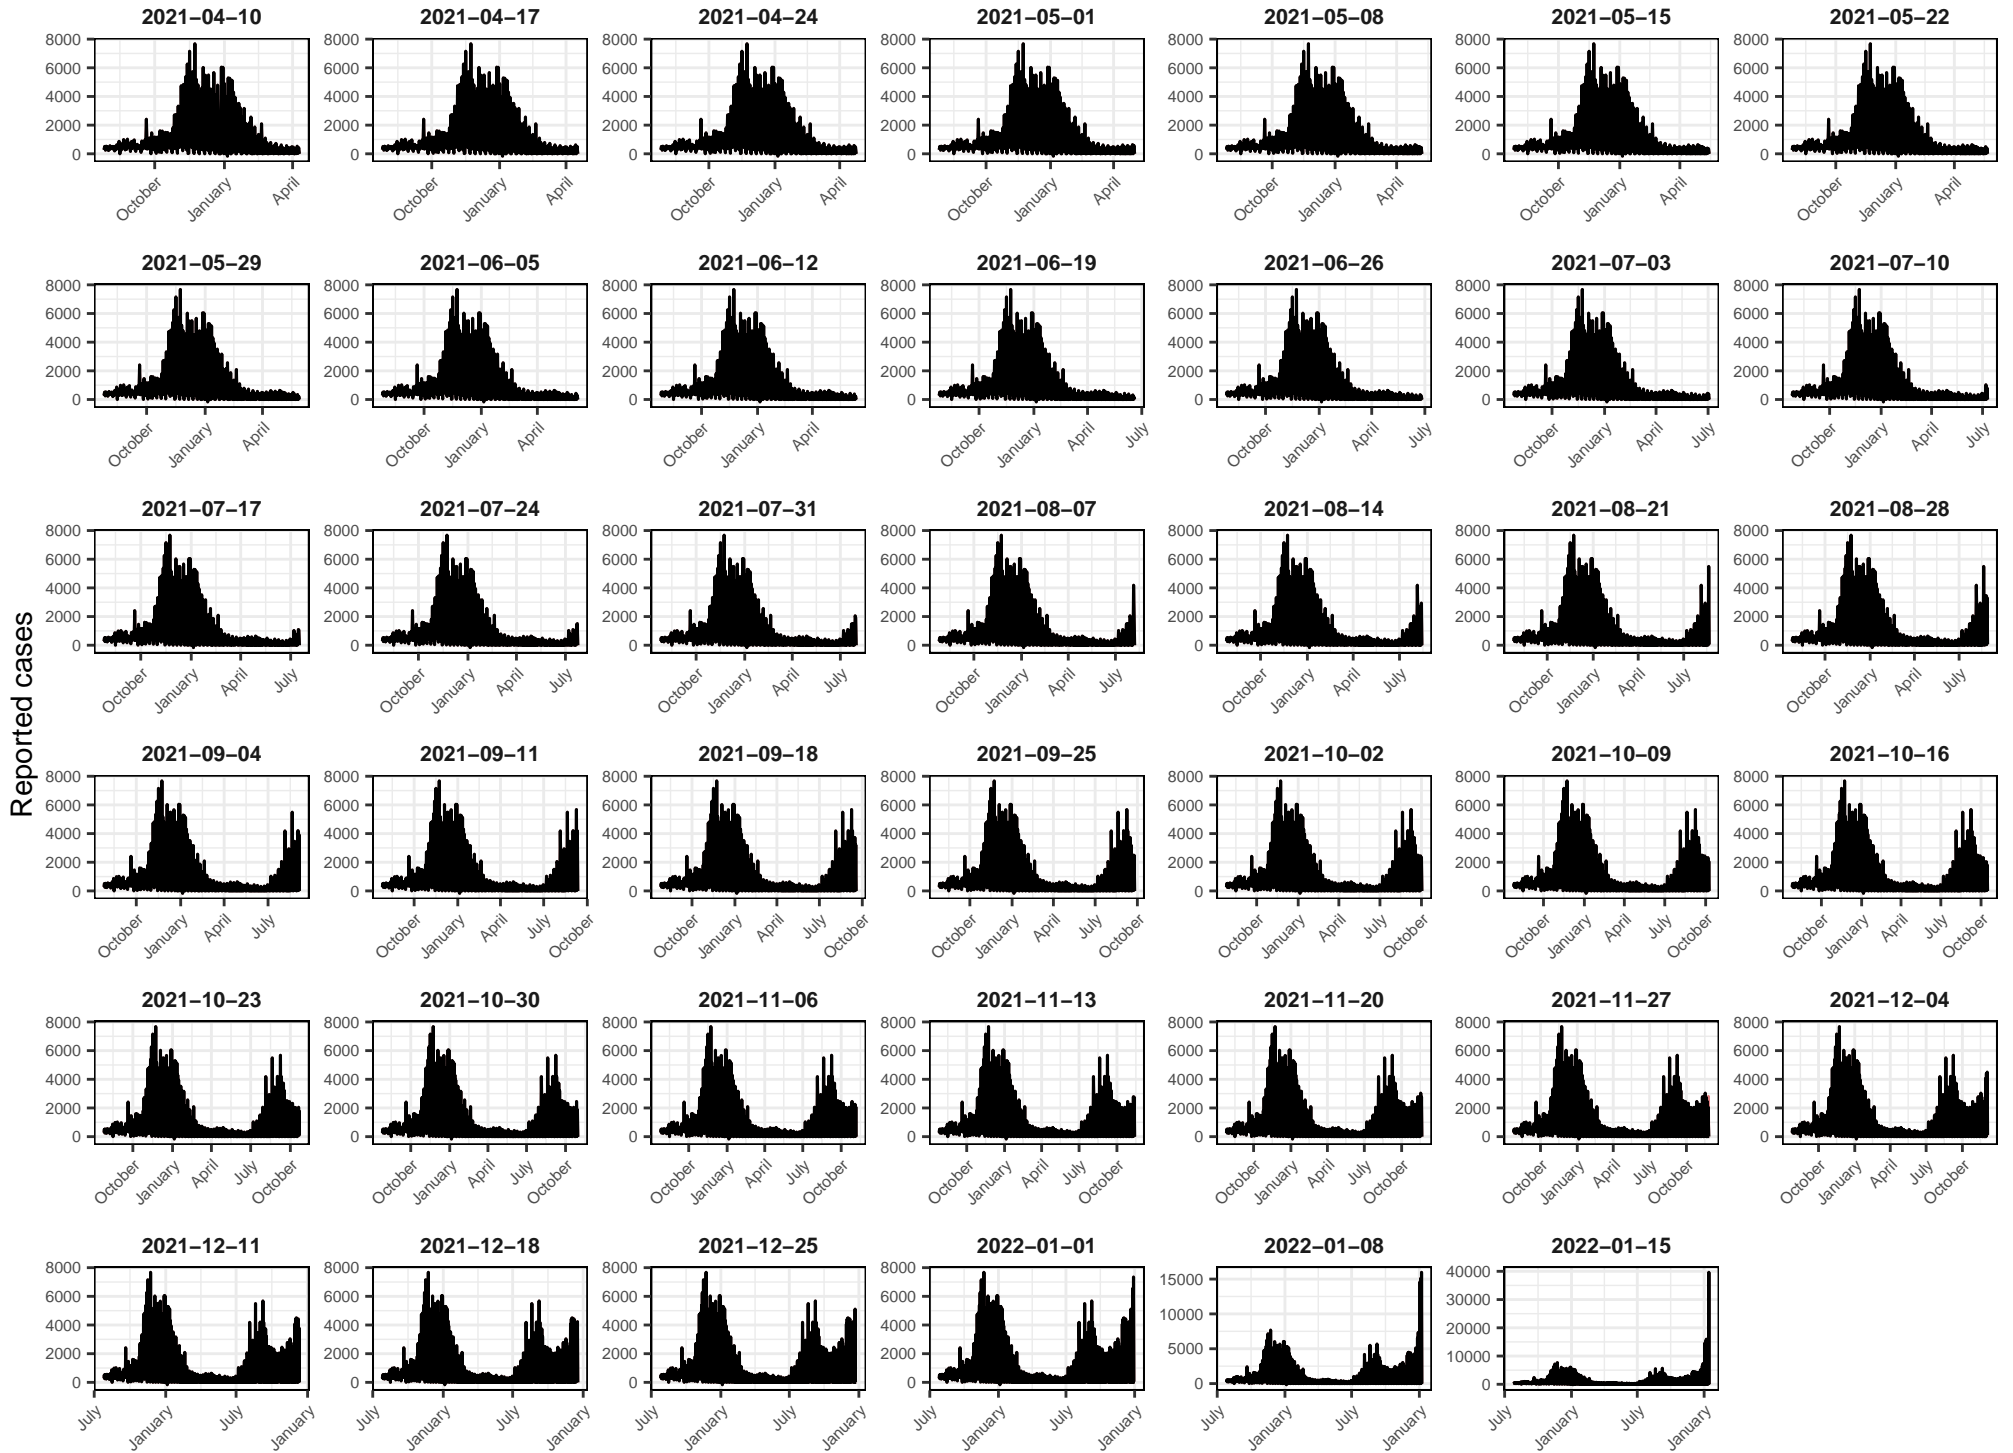

# Kentucky

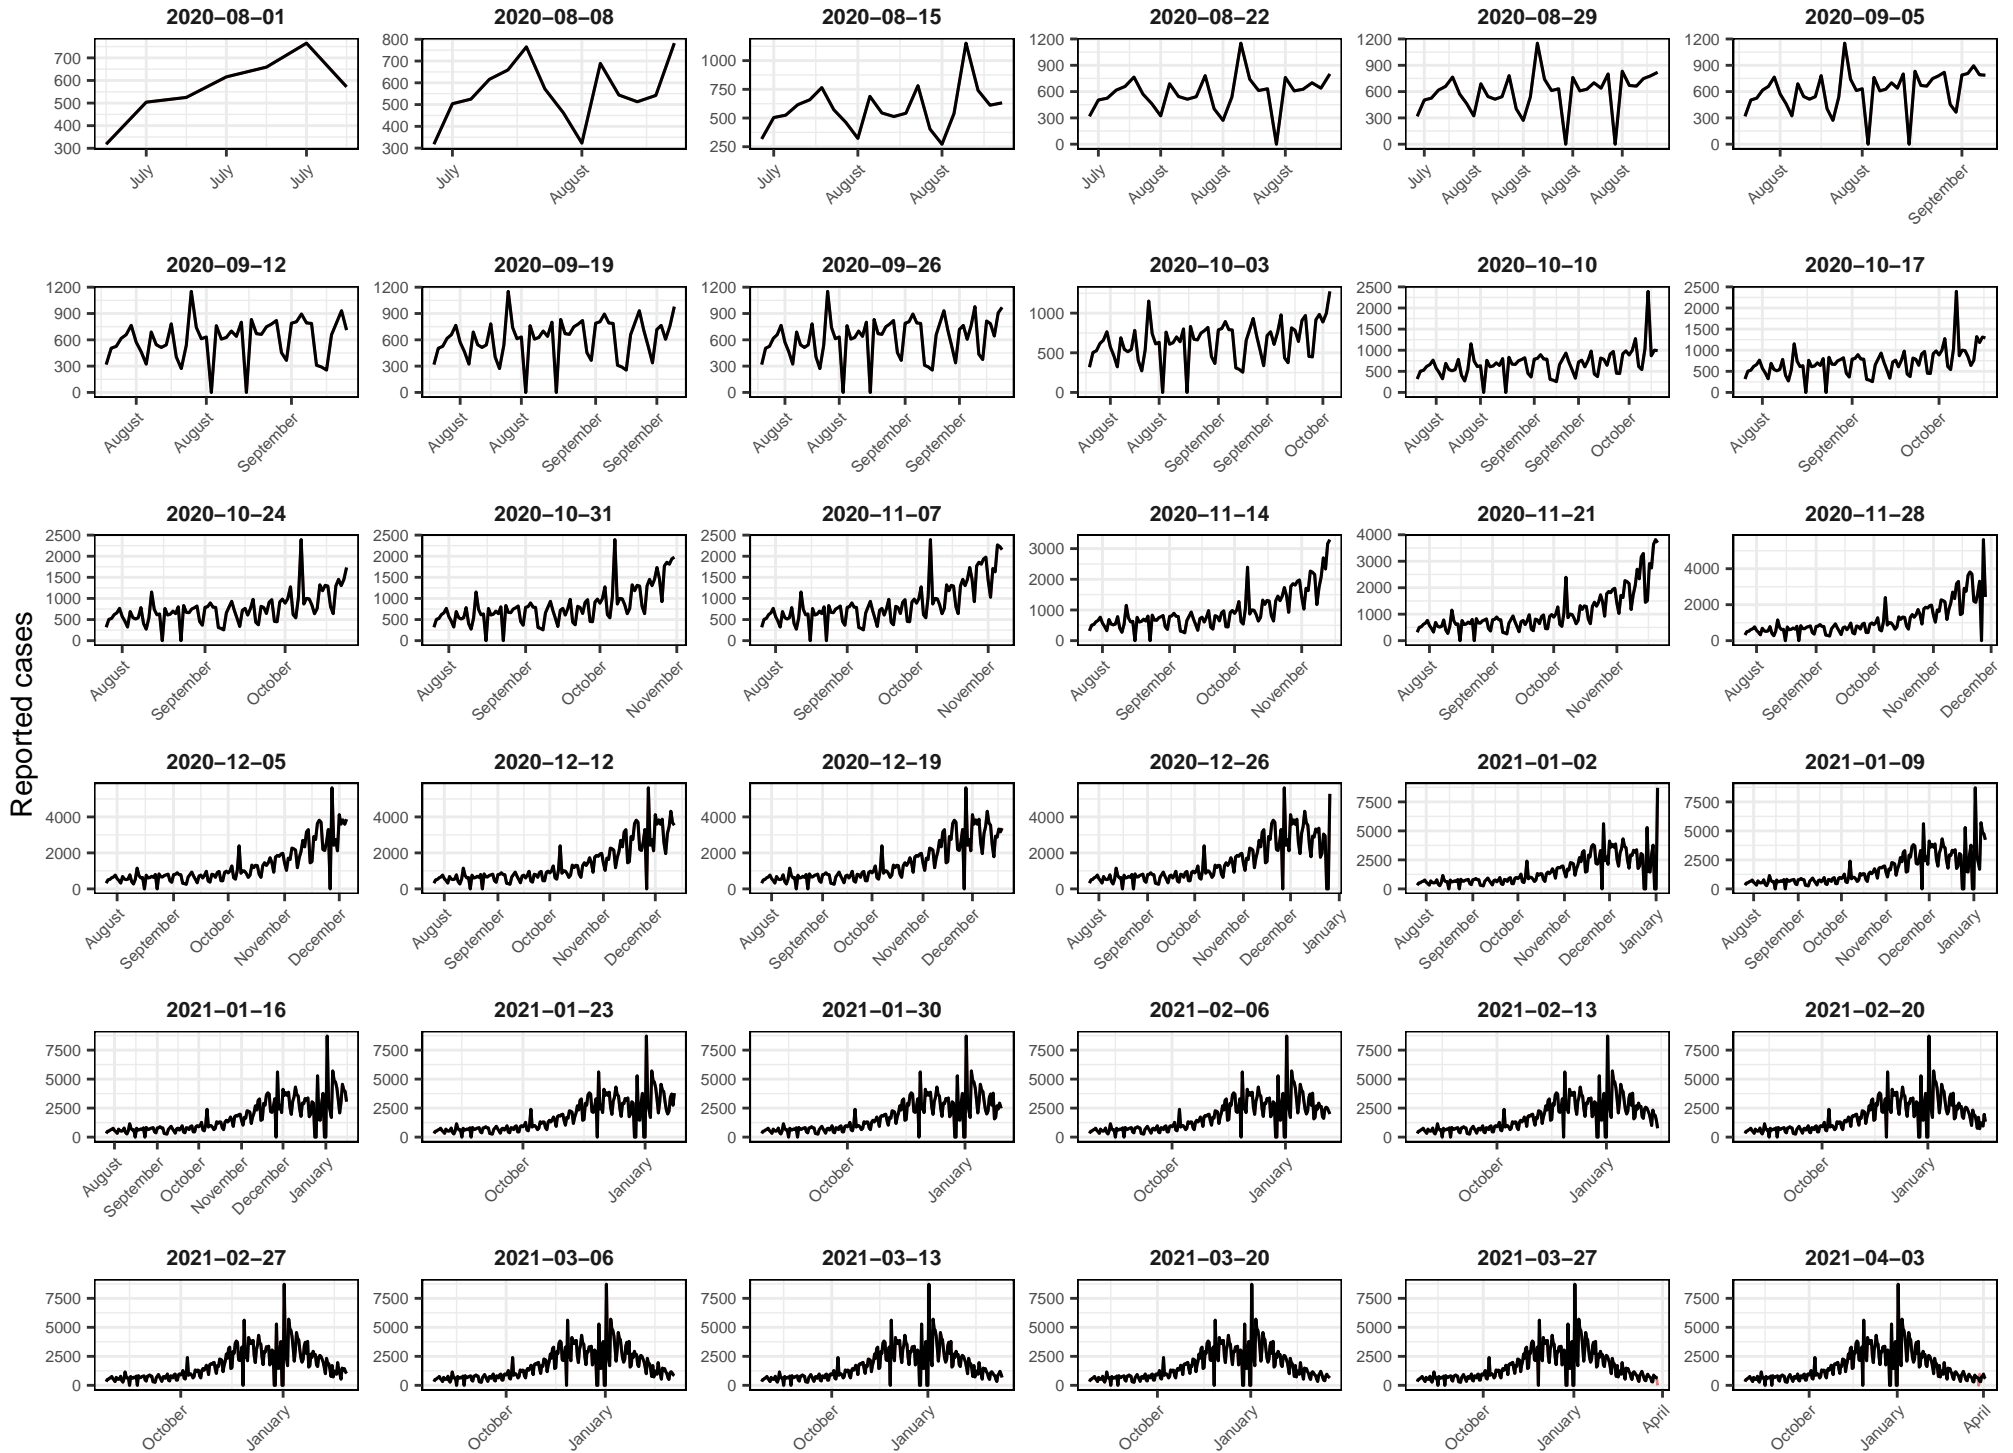

# Kentucky

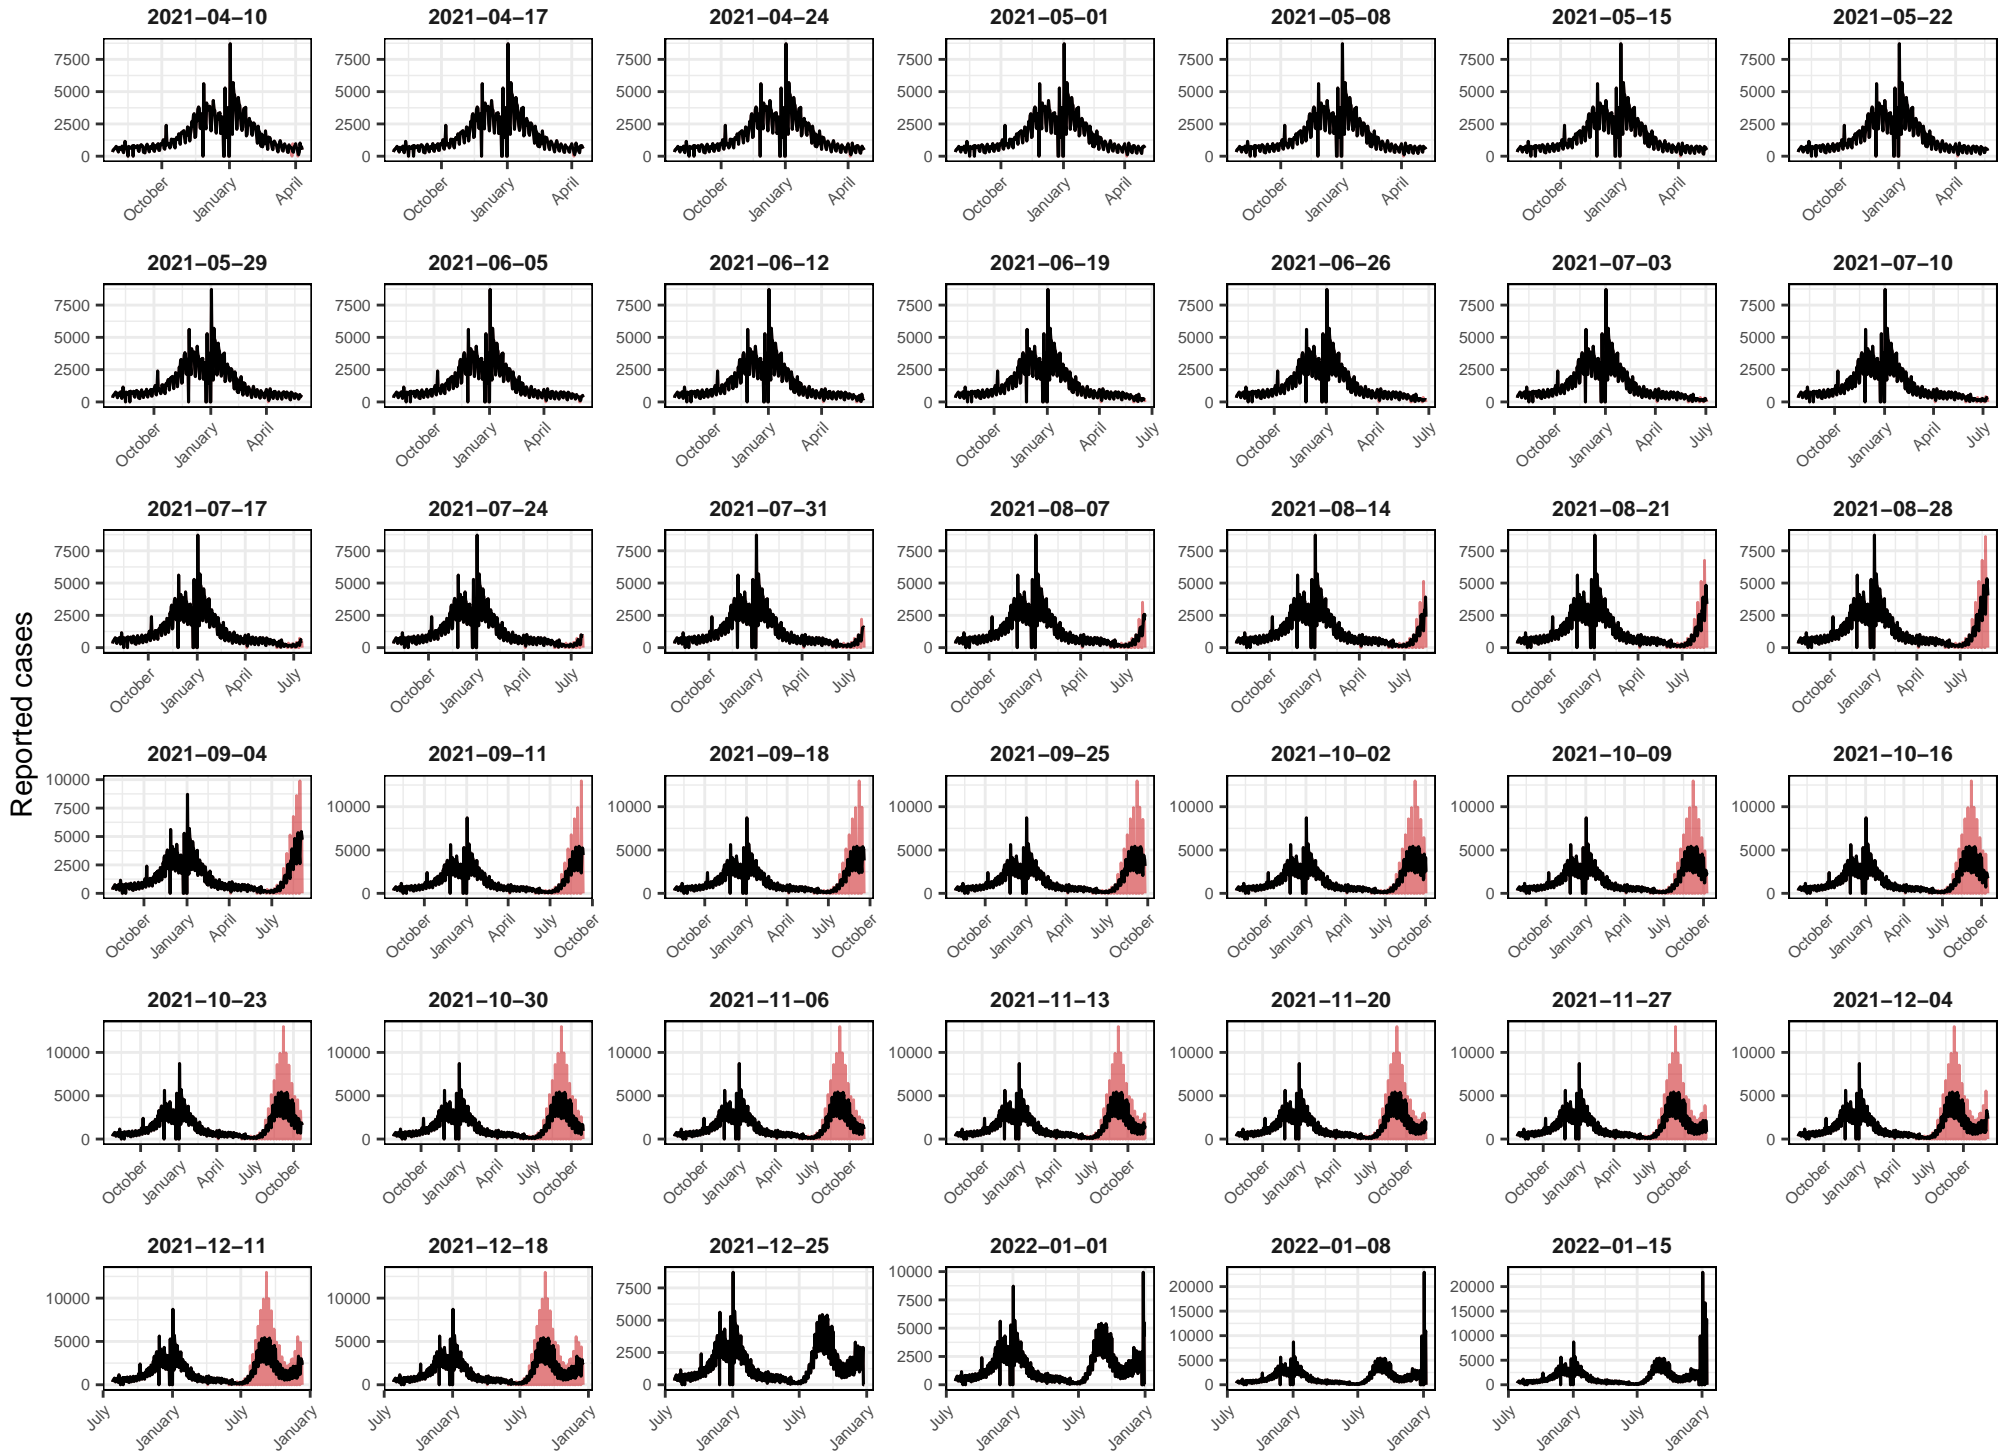

# Louisiana

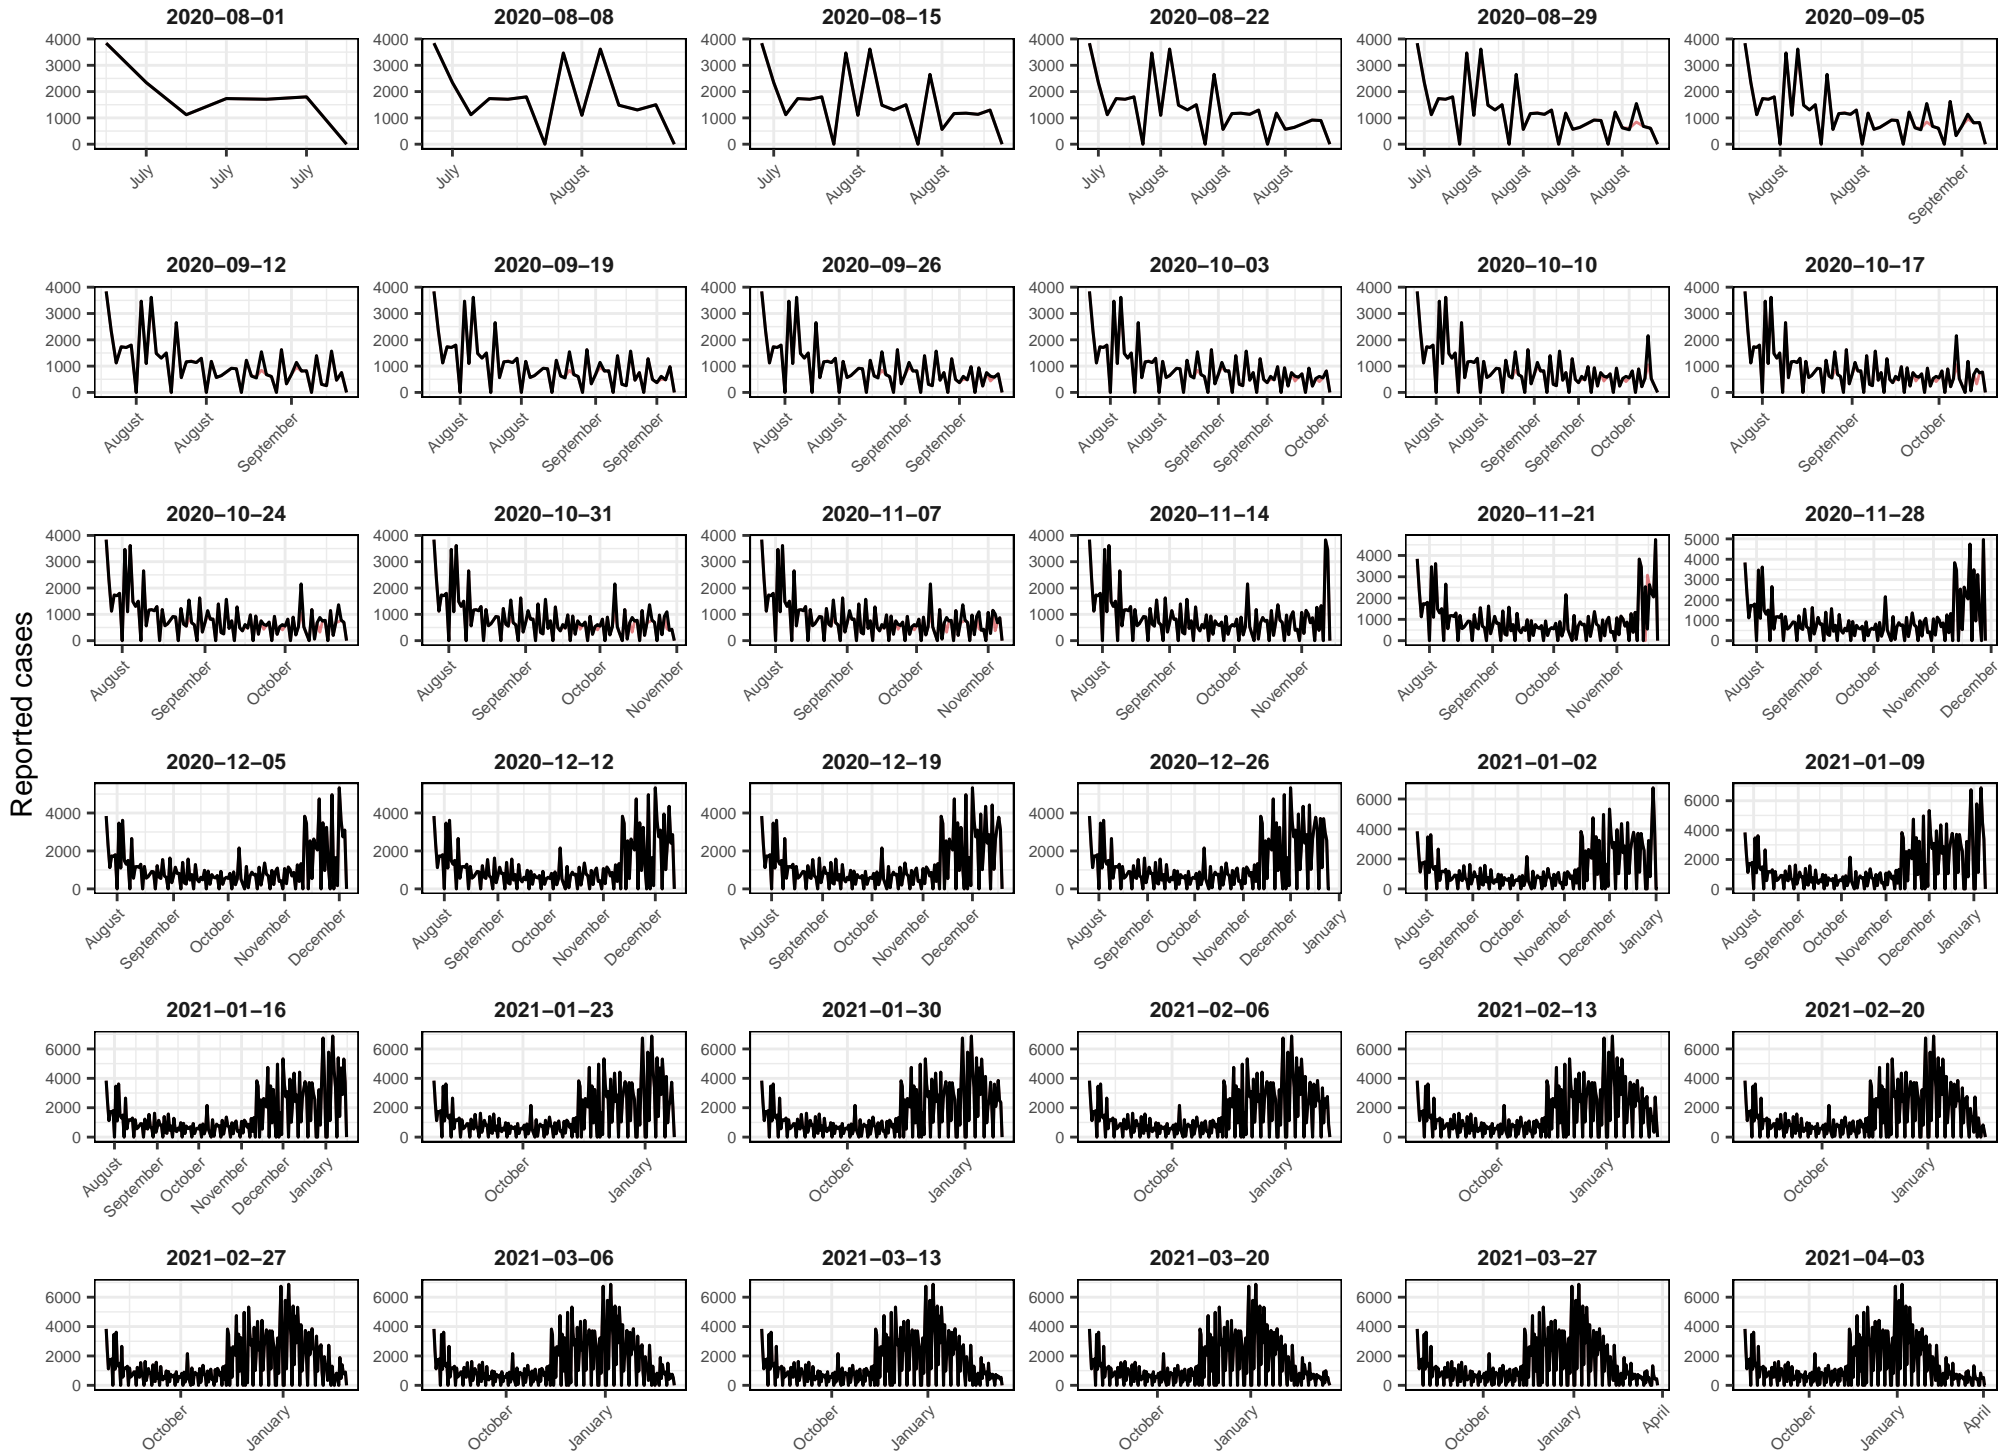

# Louisiana

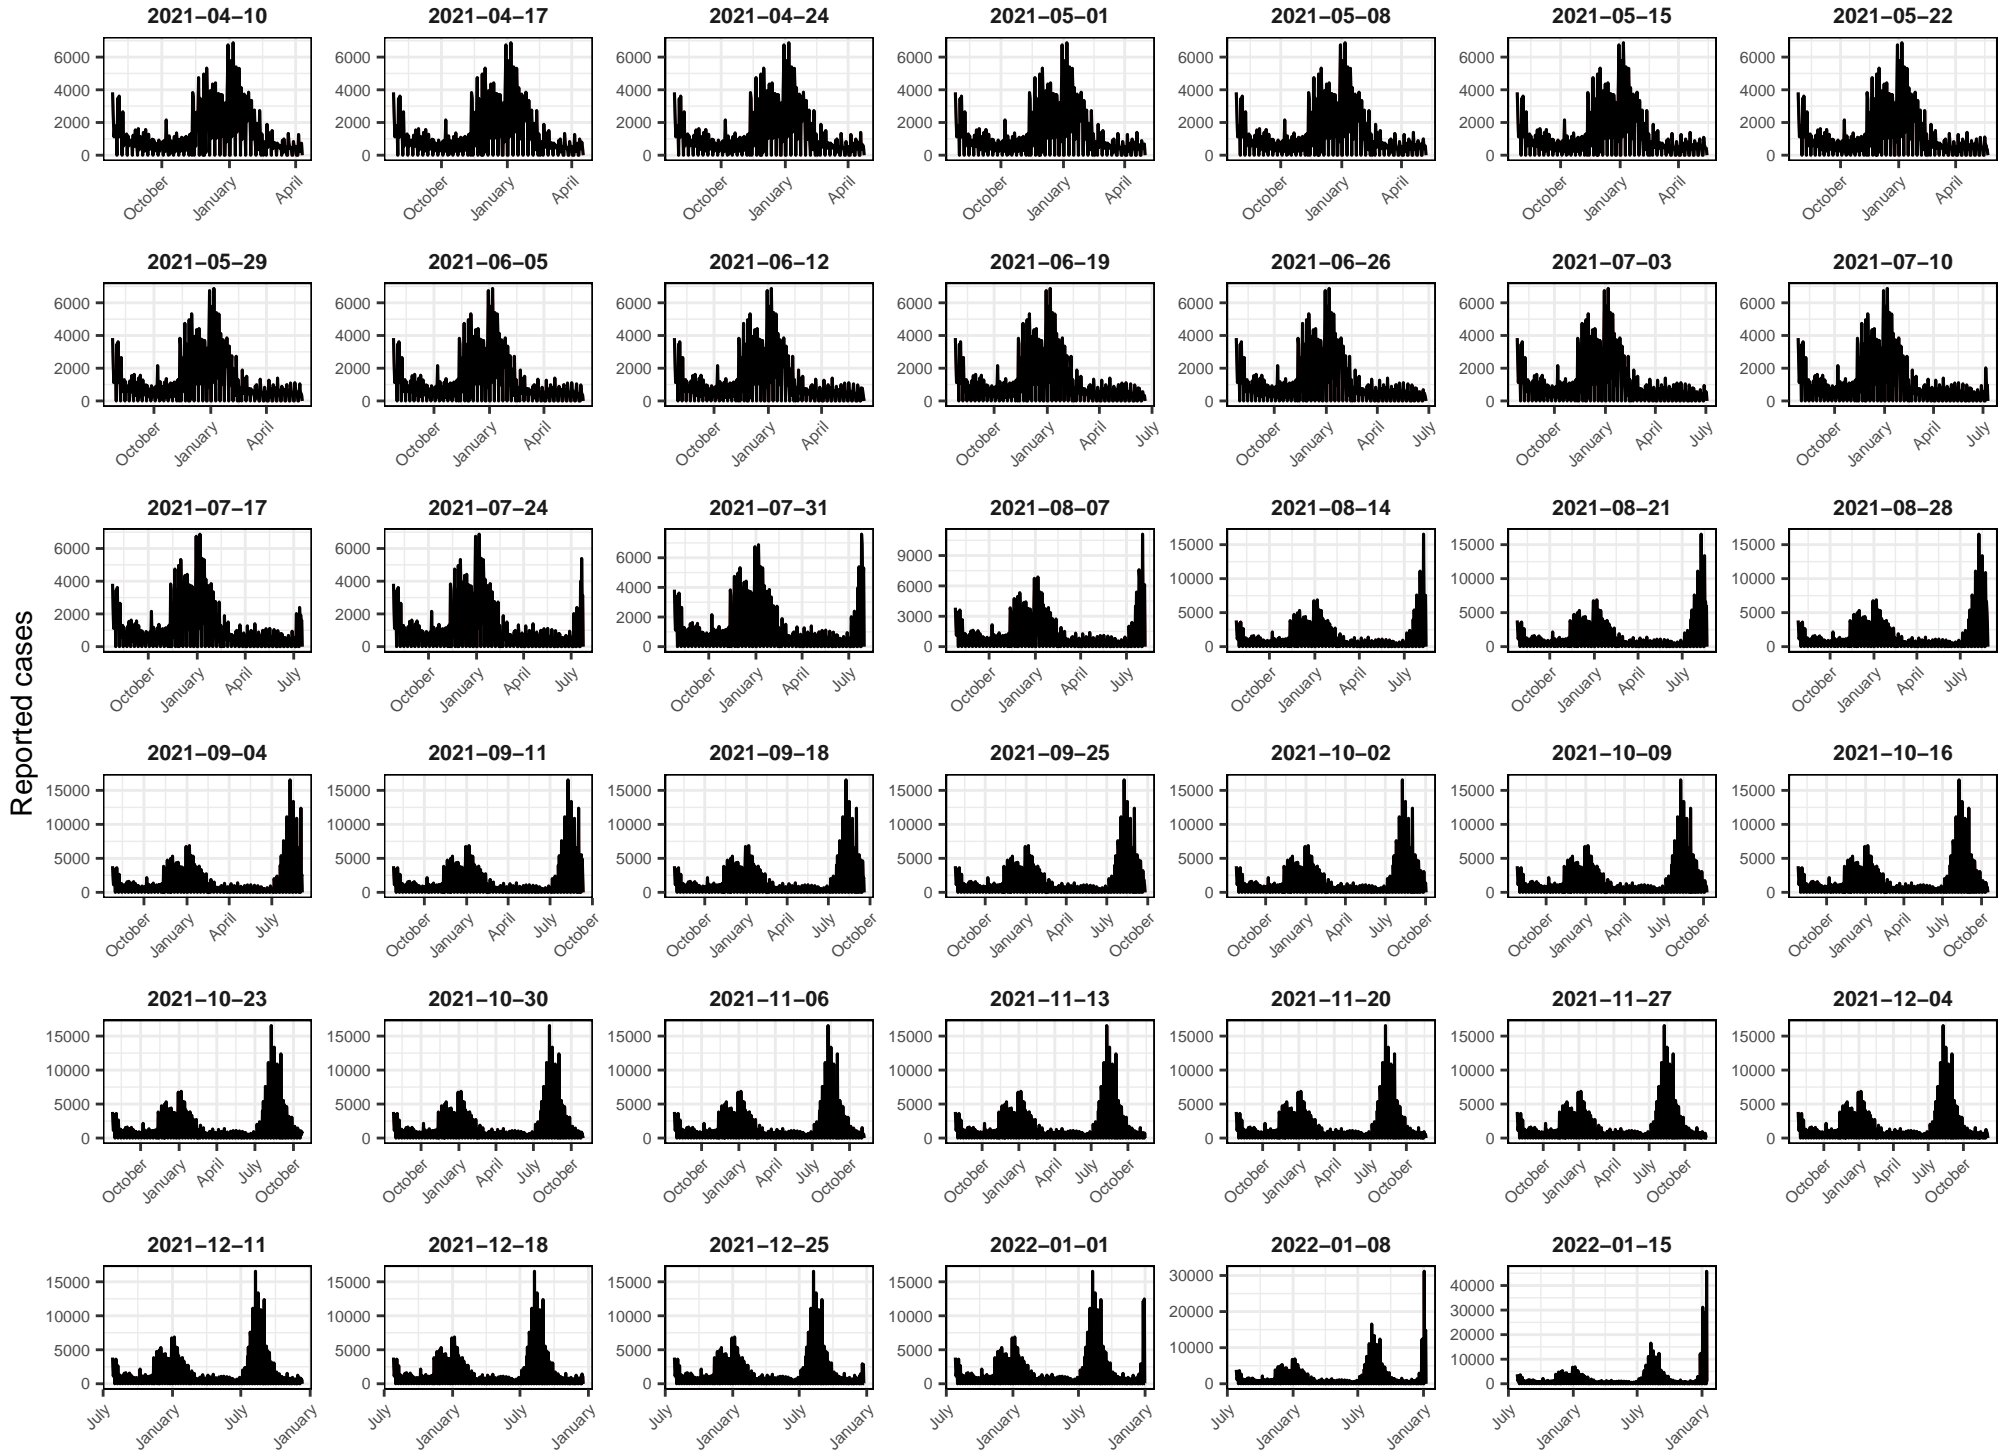

# Maine

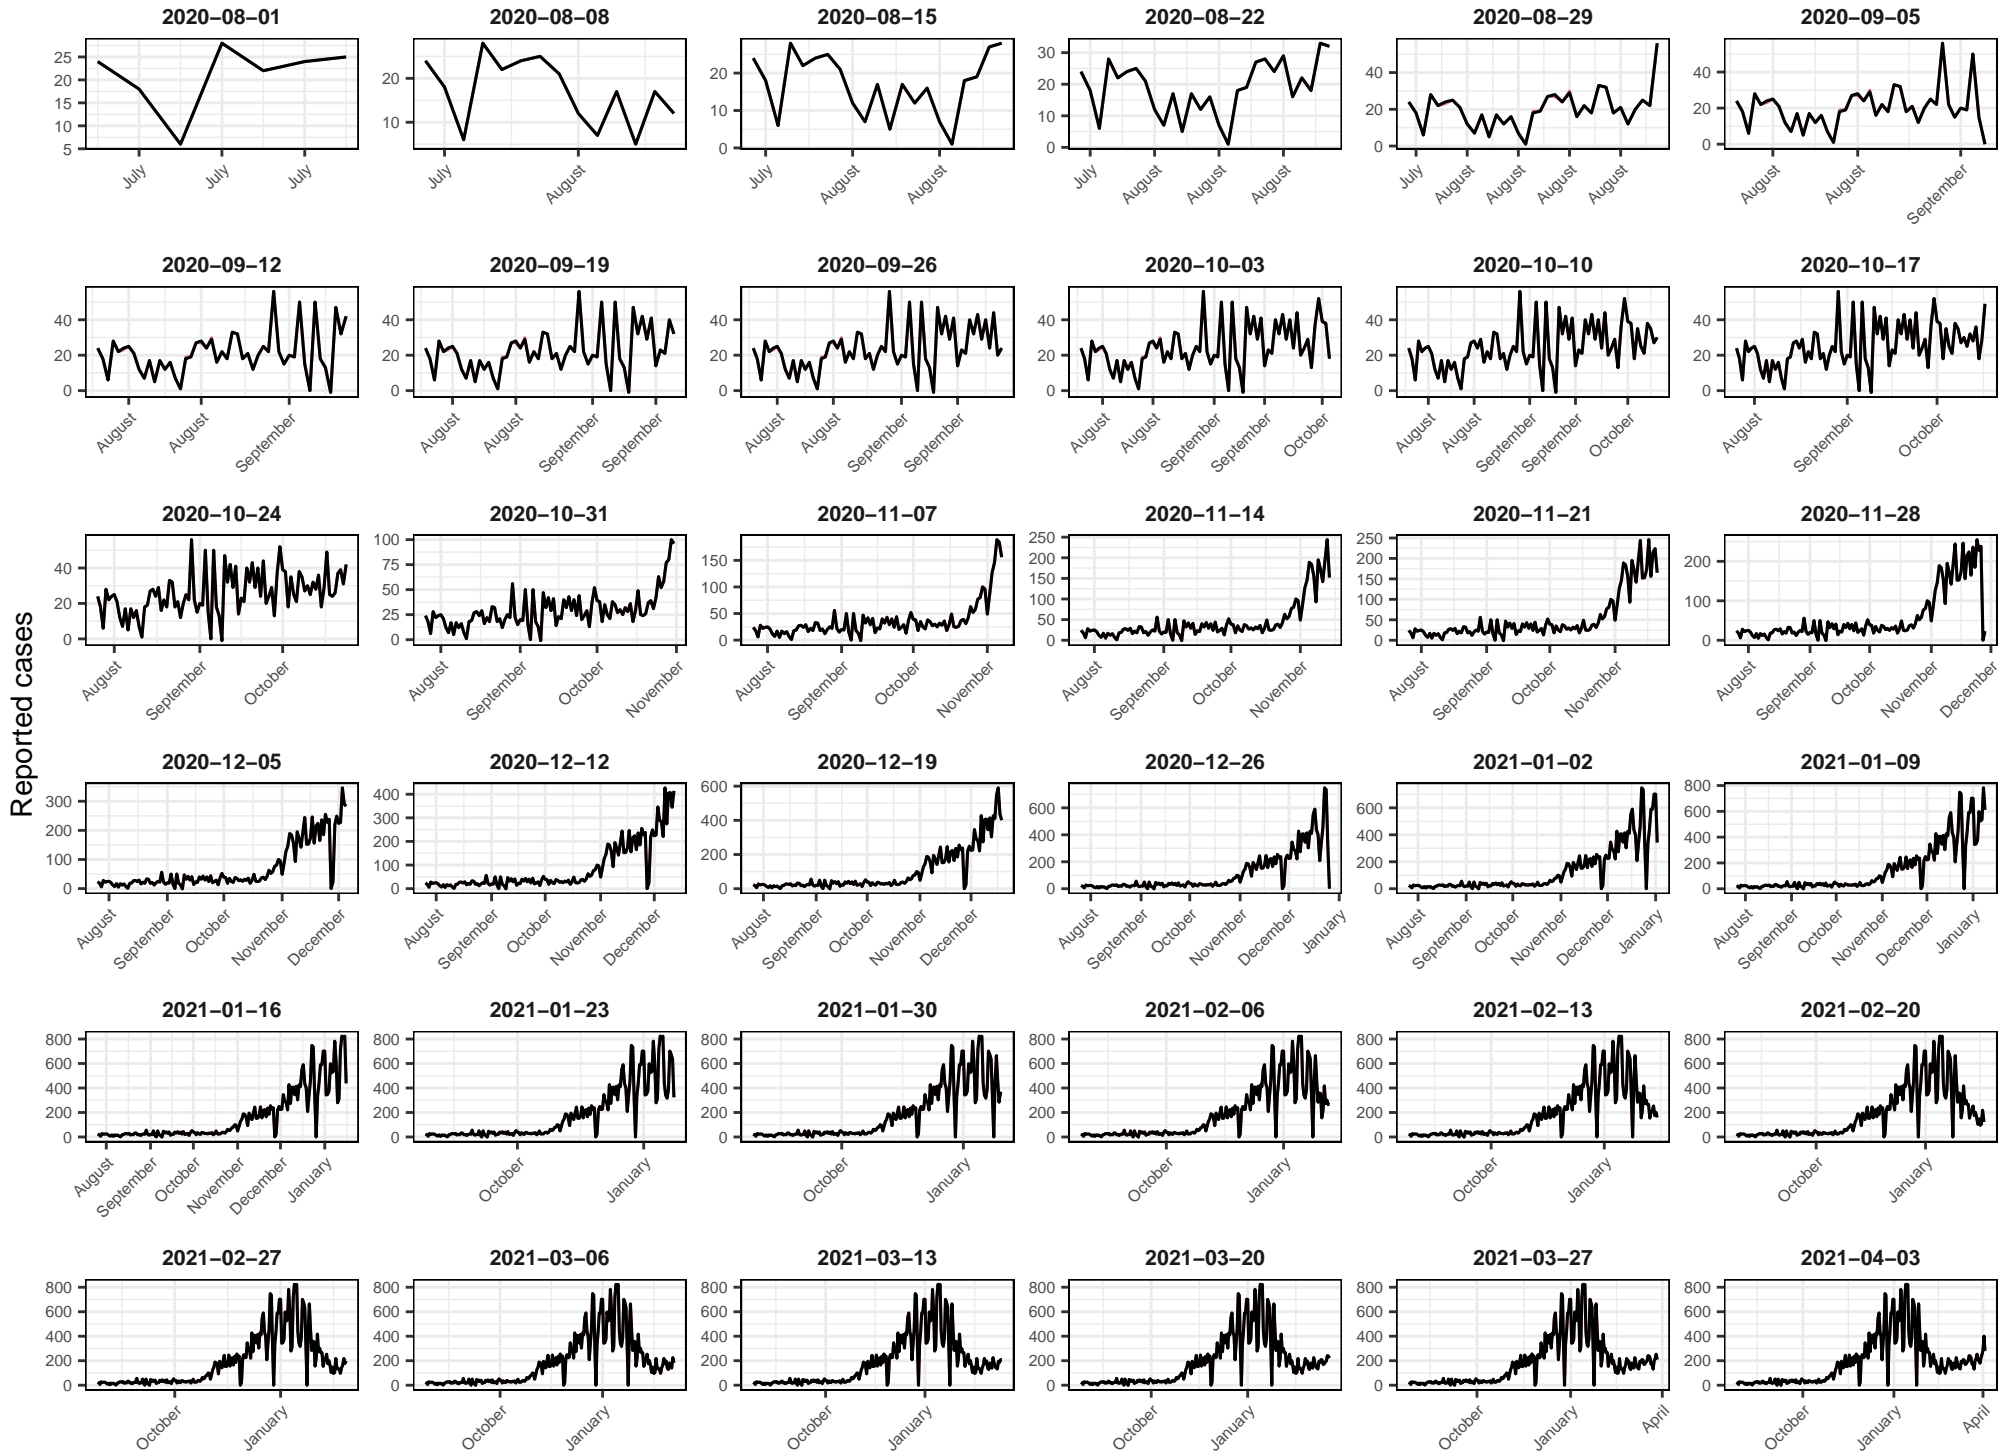

# Maine

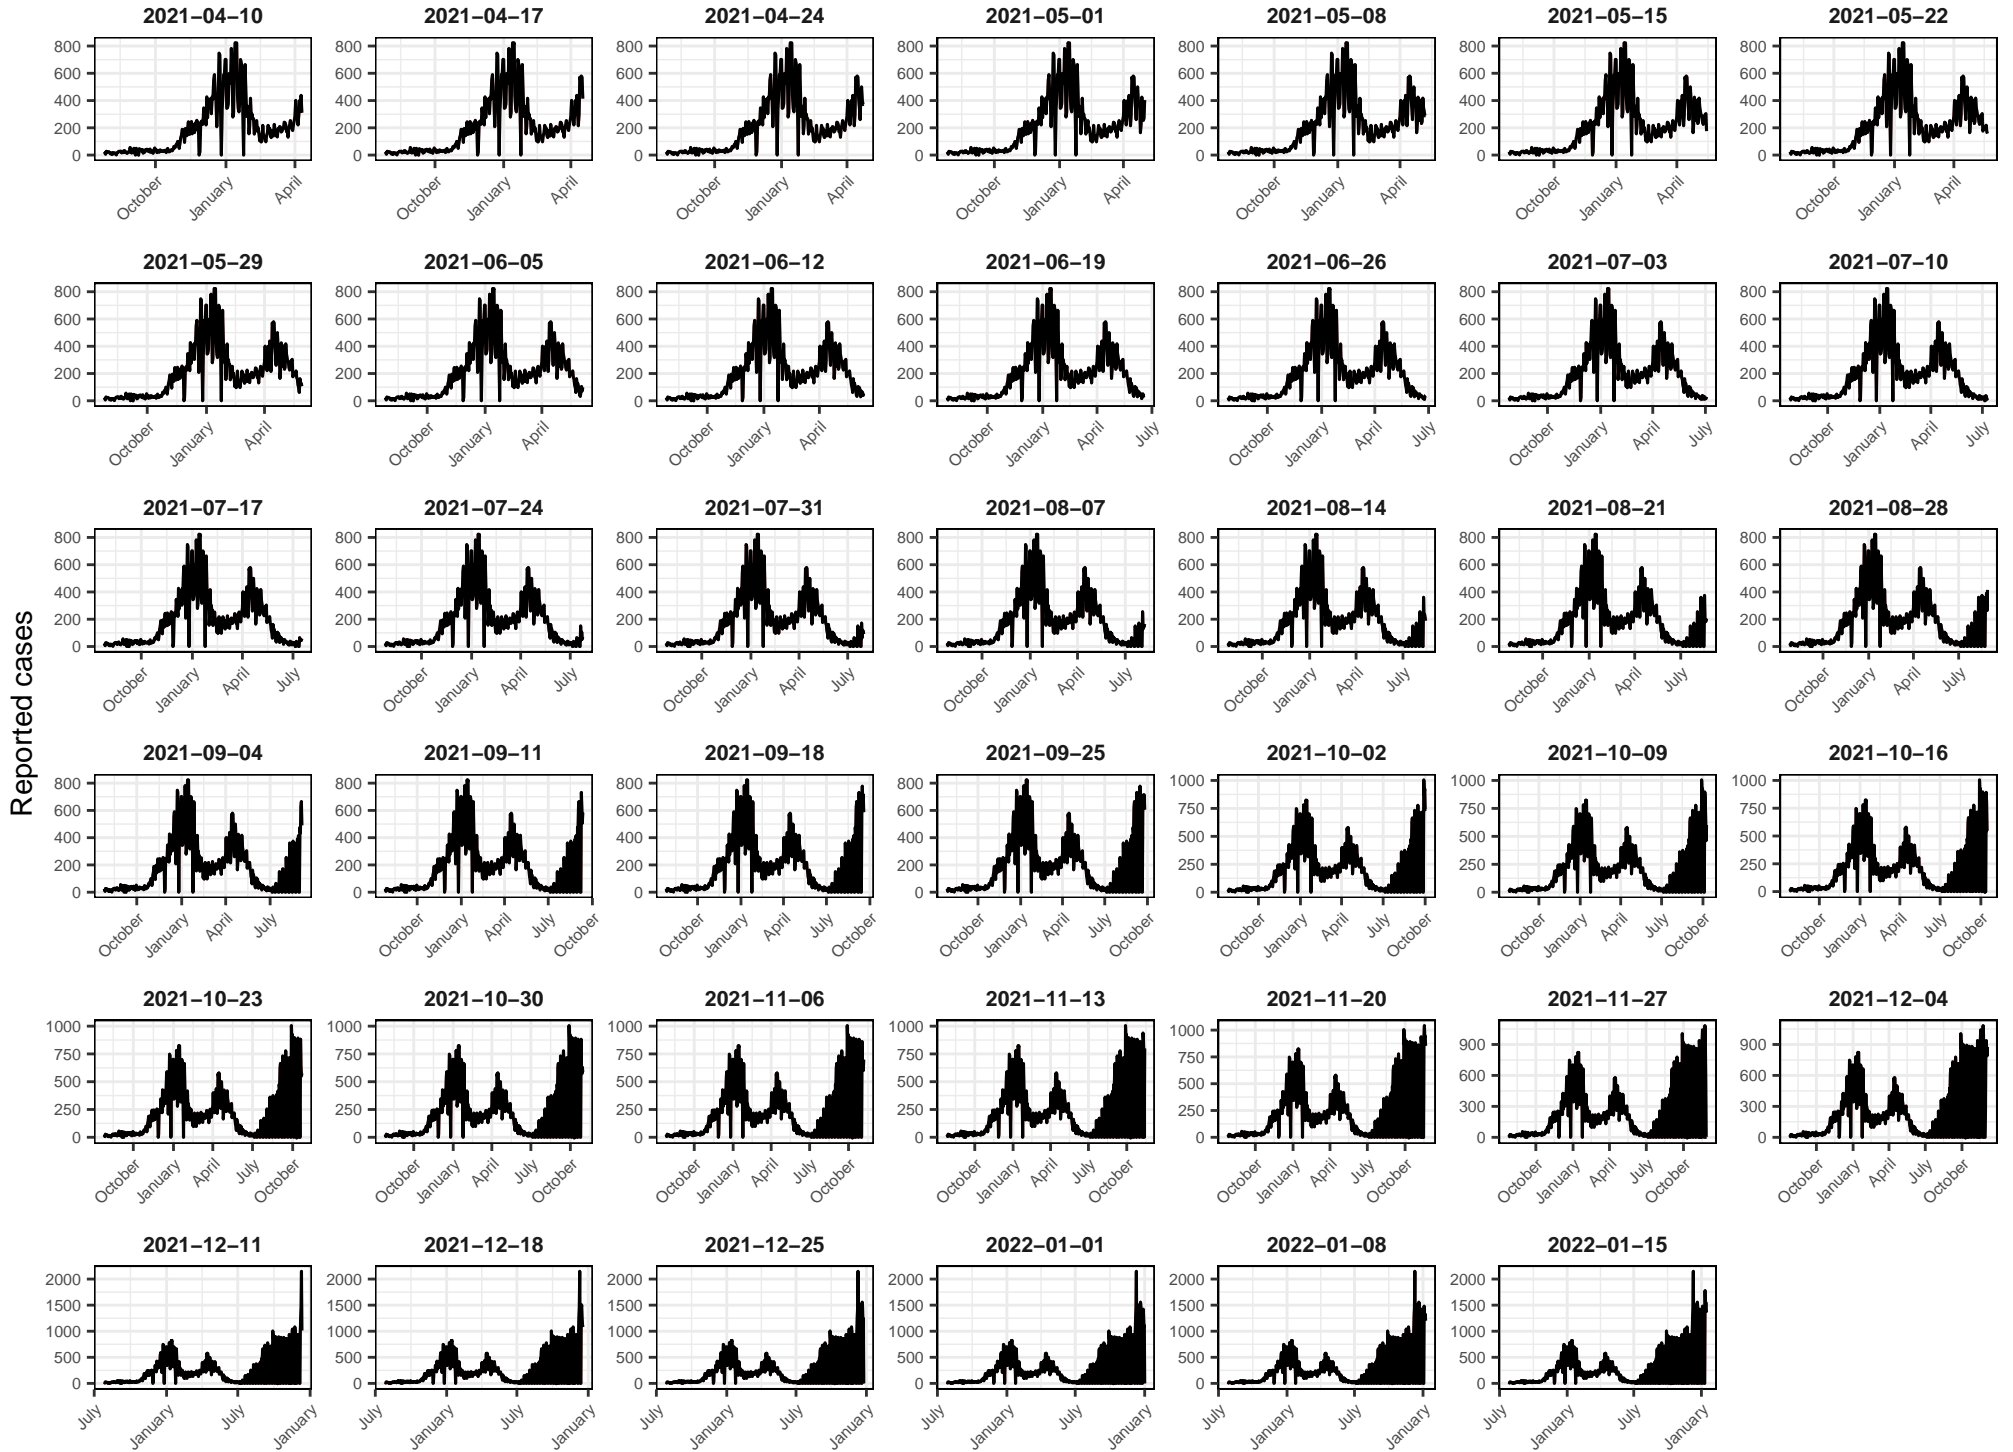



# Maryland

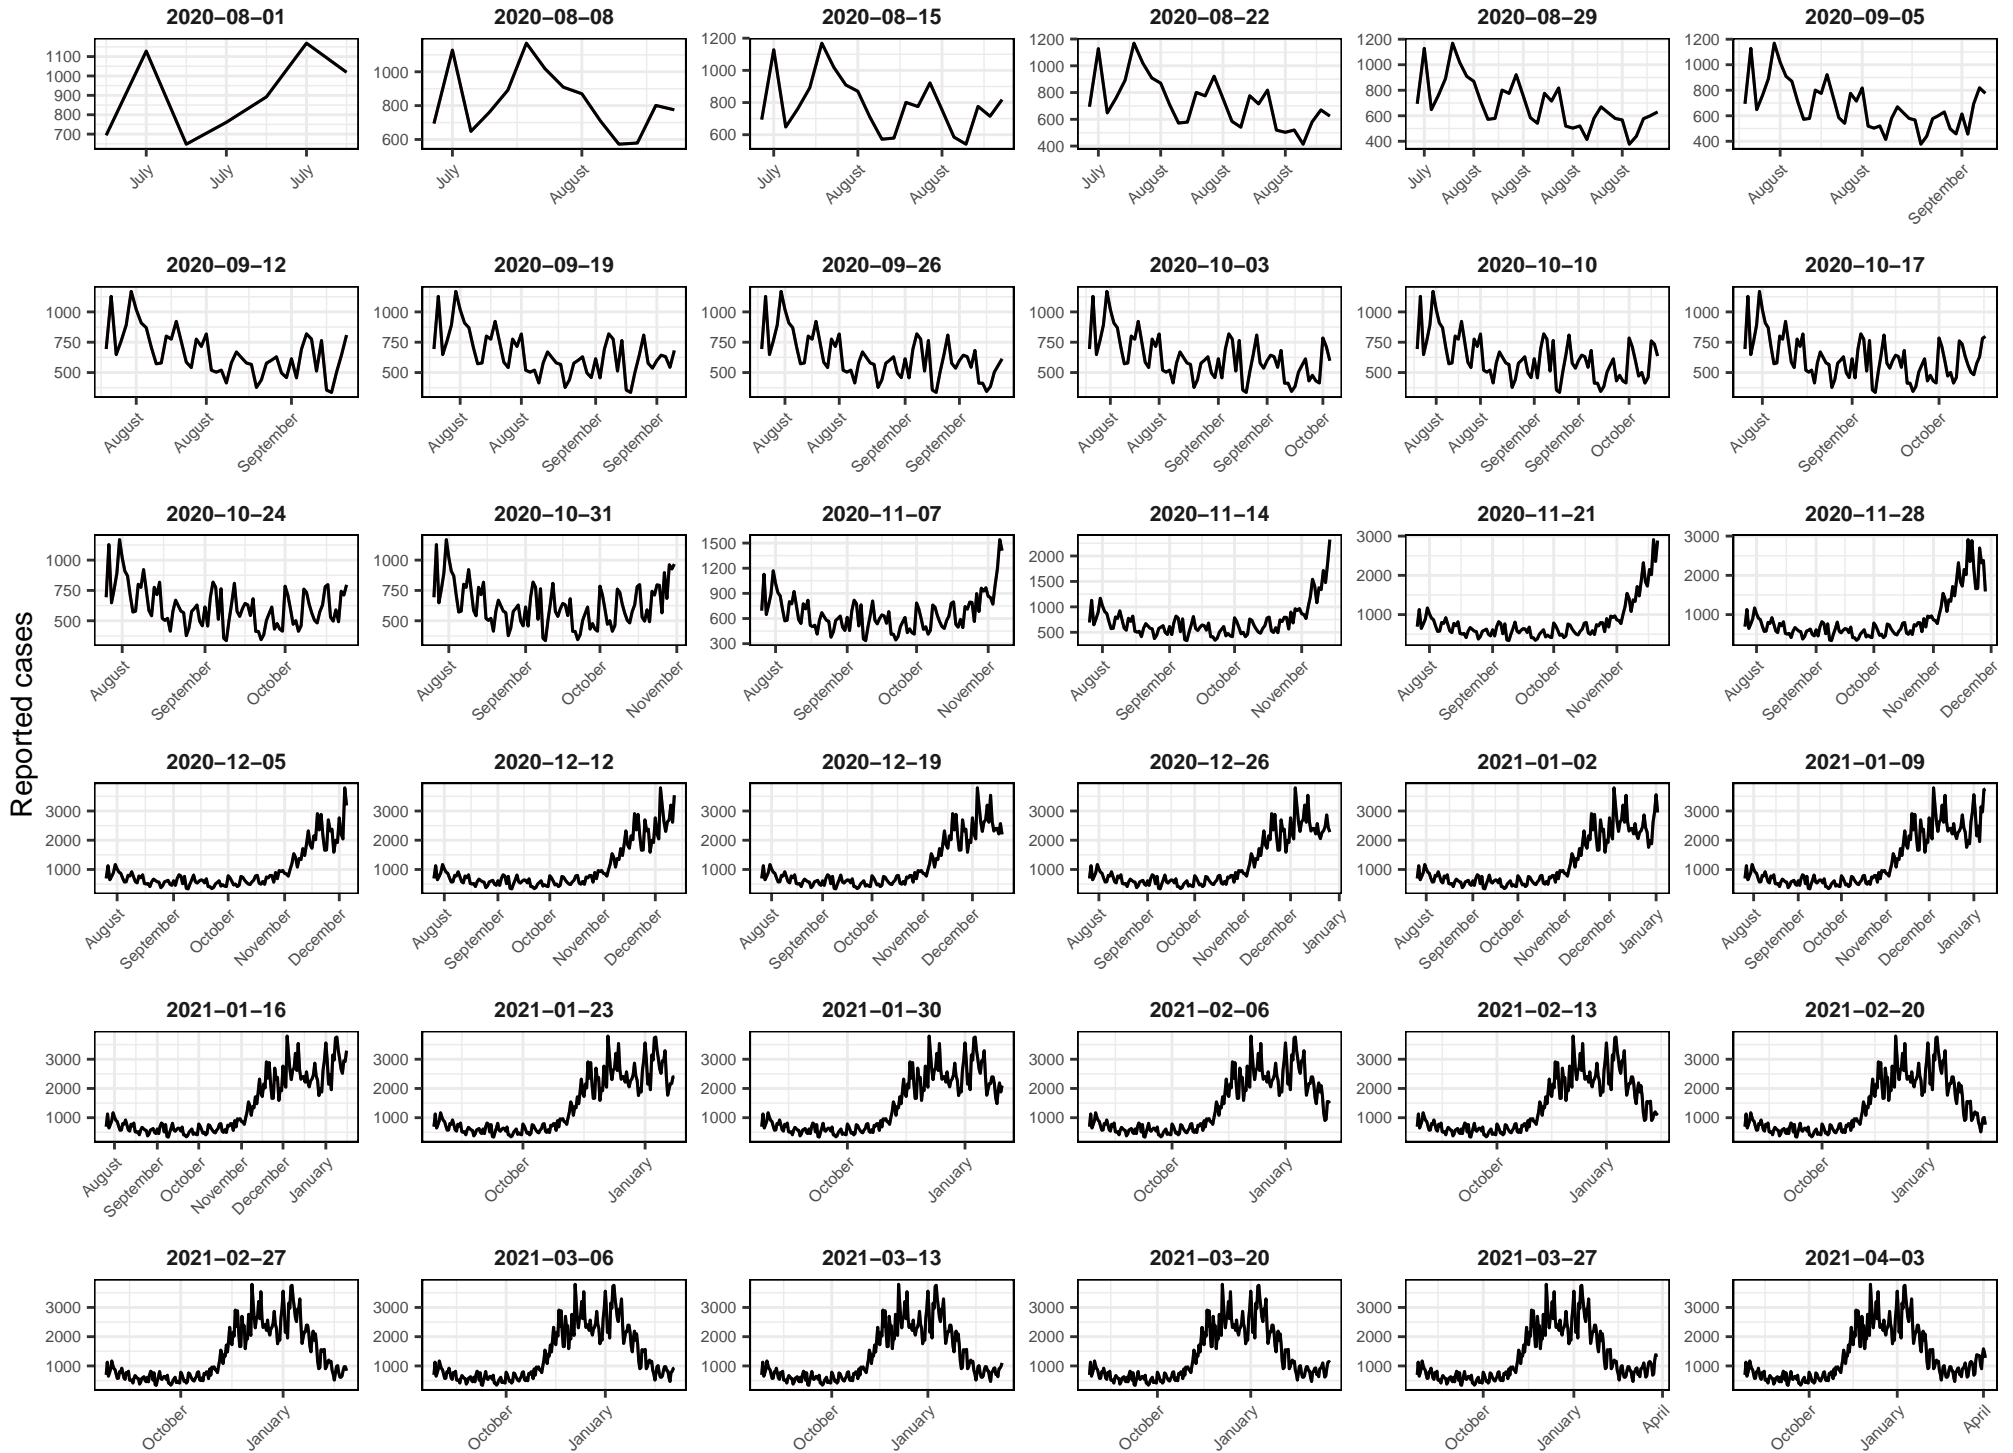

# Maryland

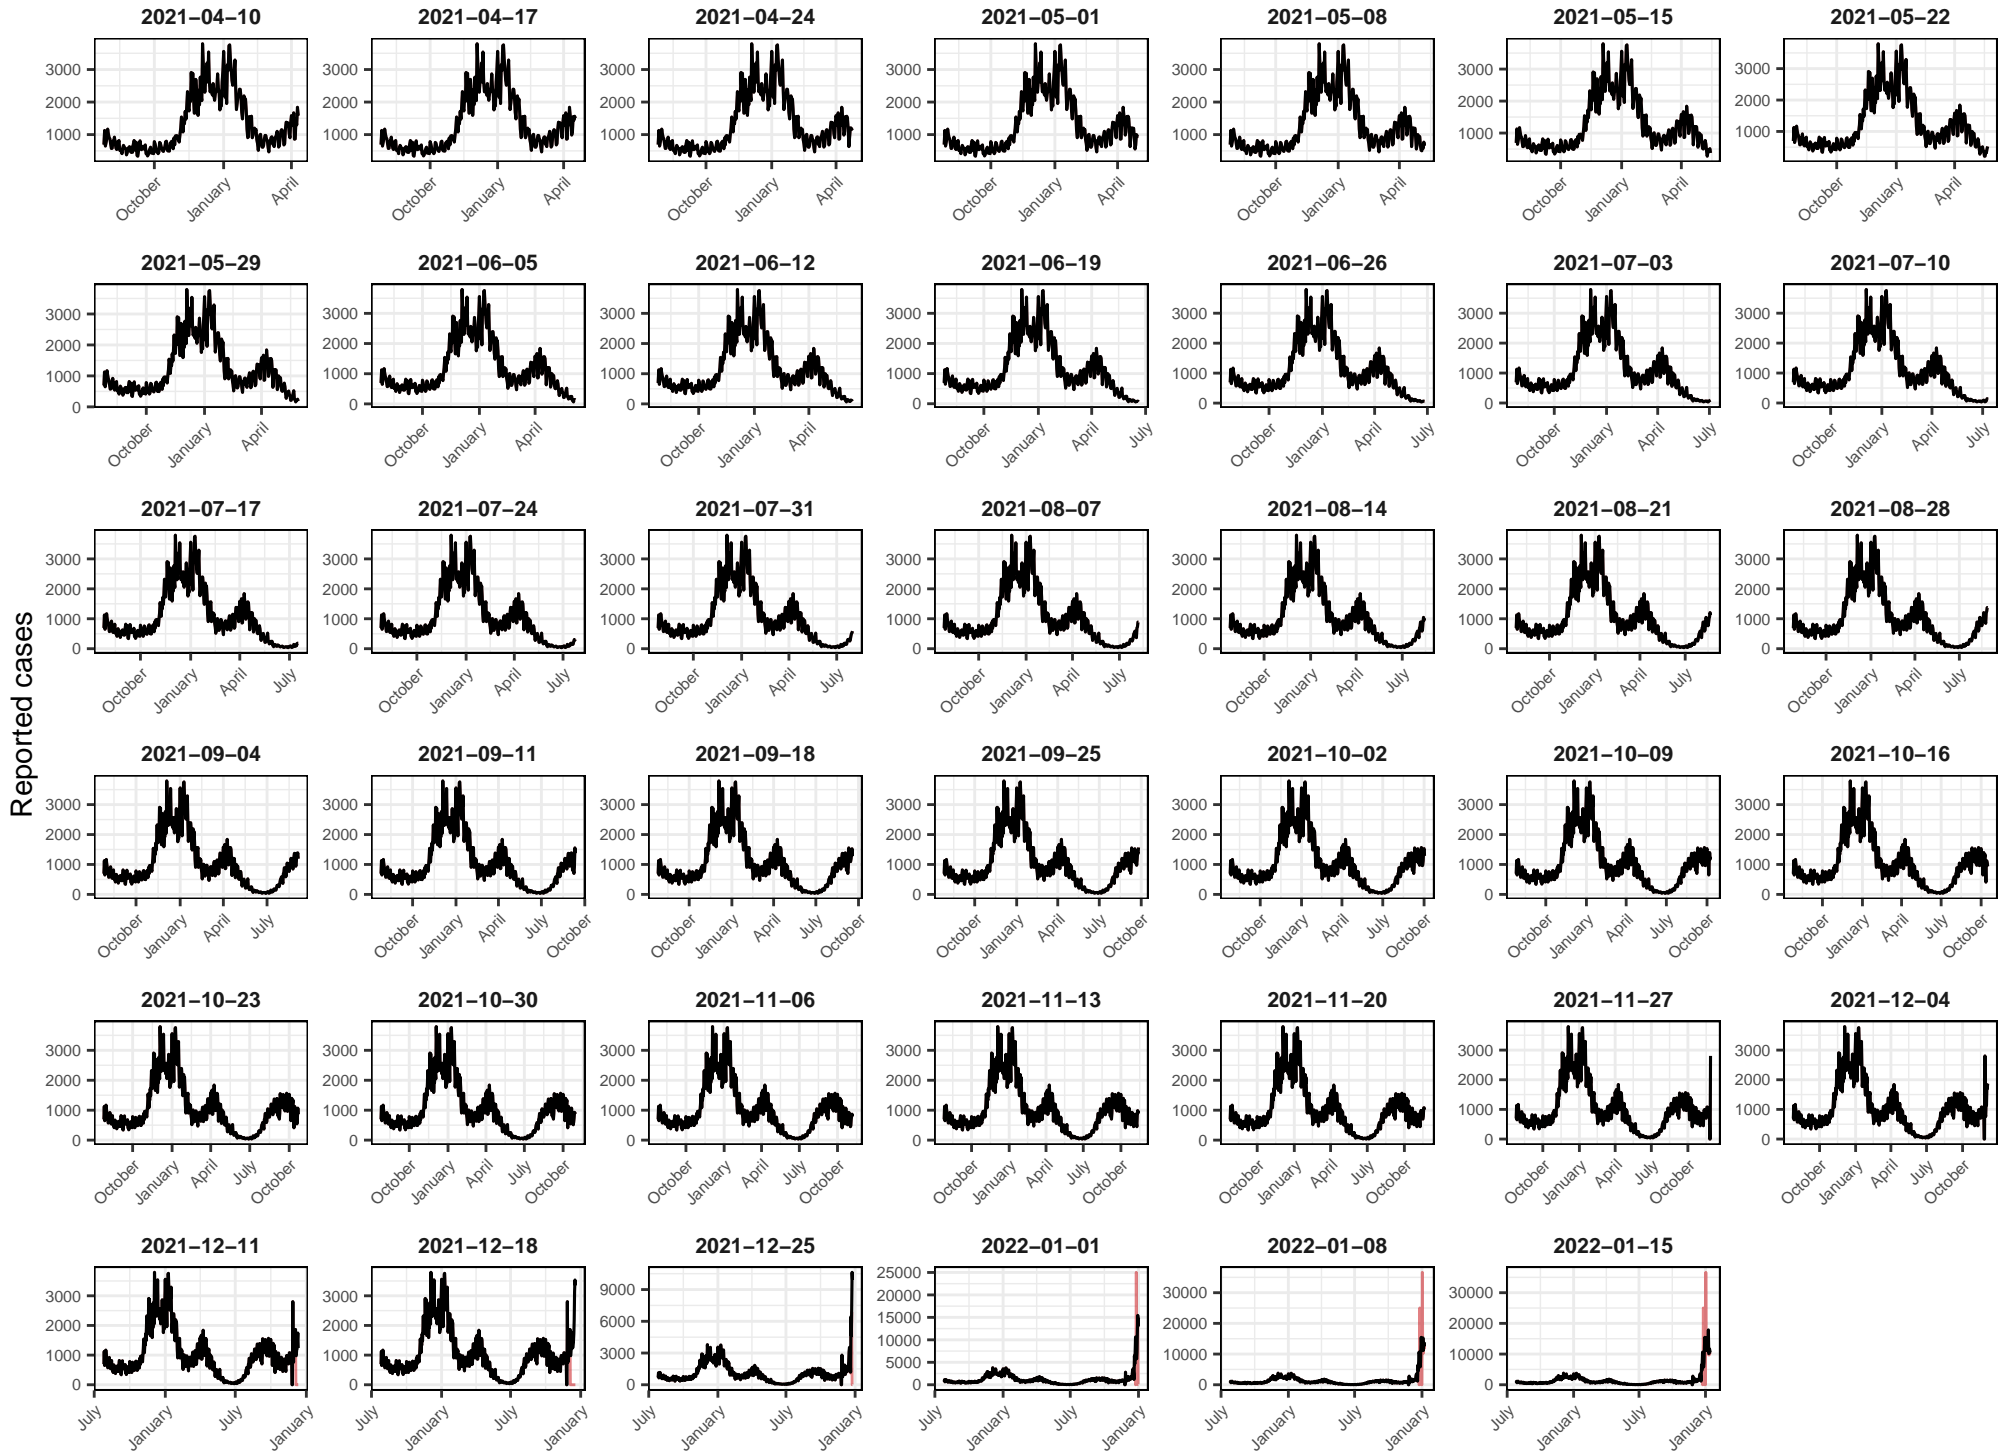

# Massachusetts

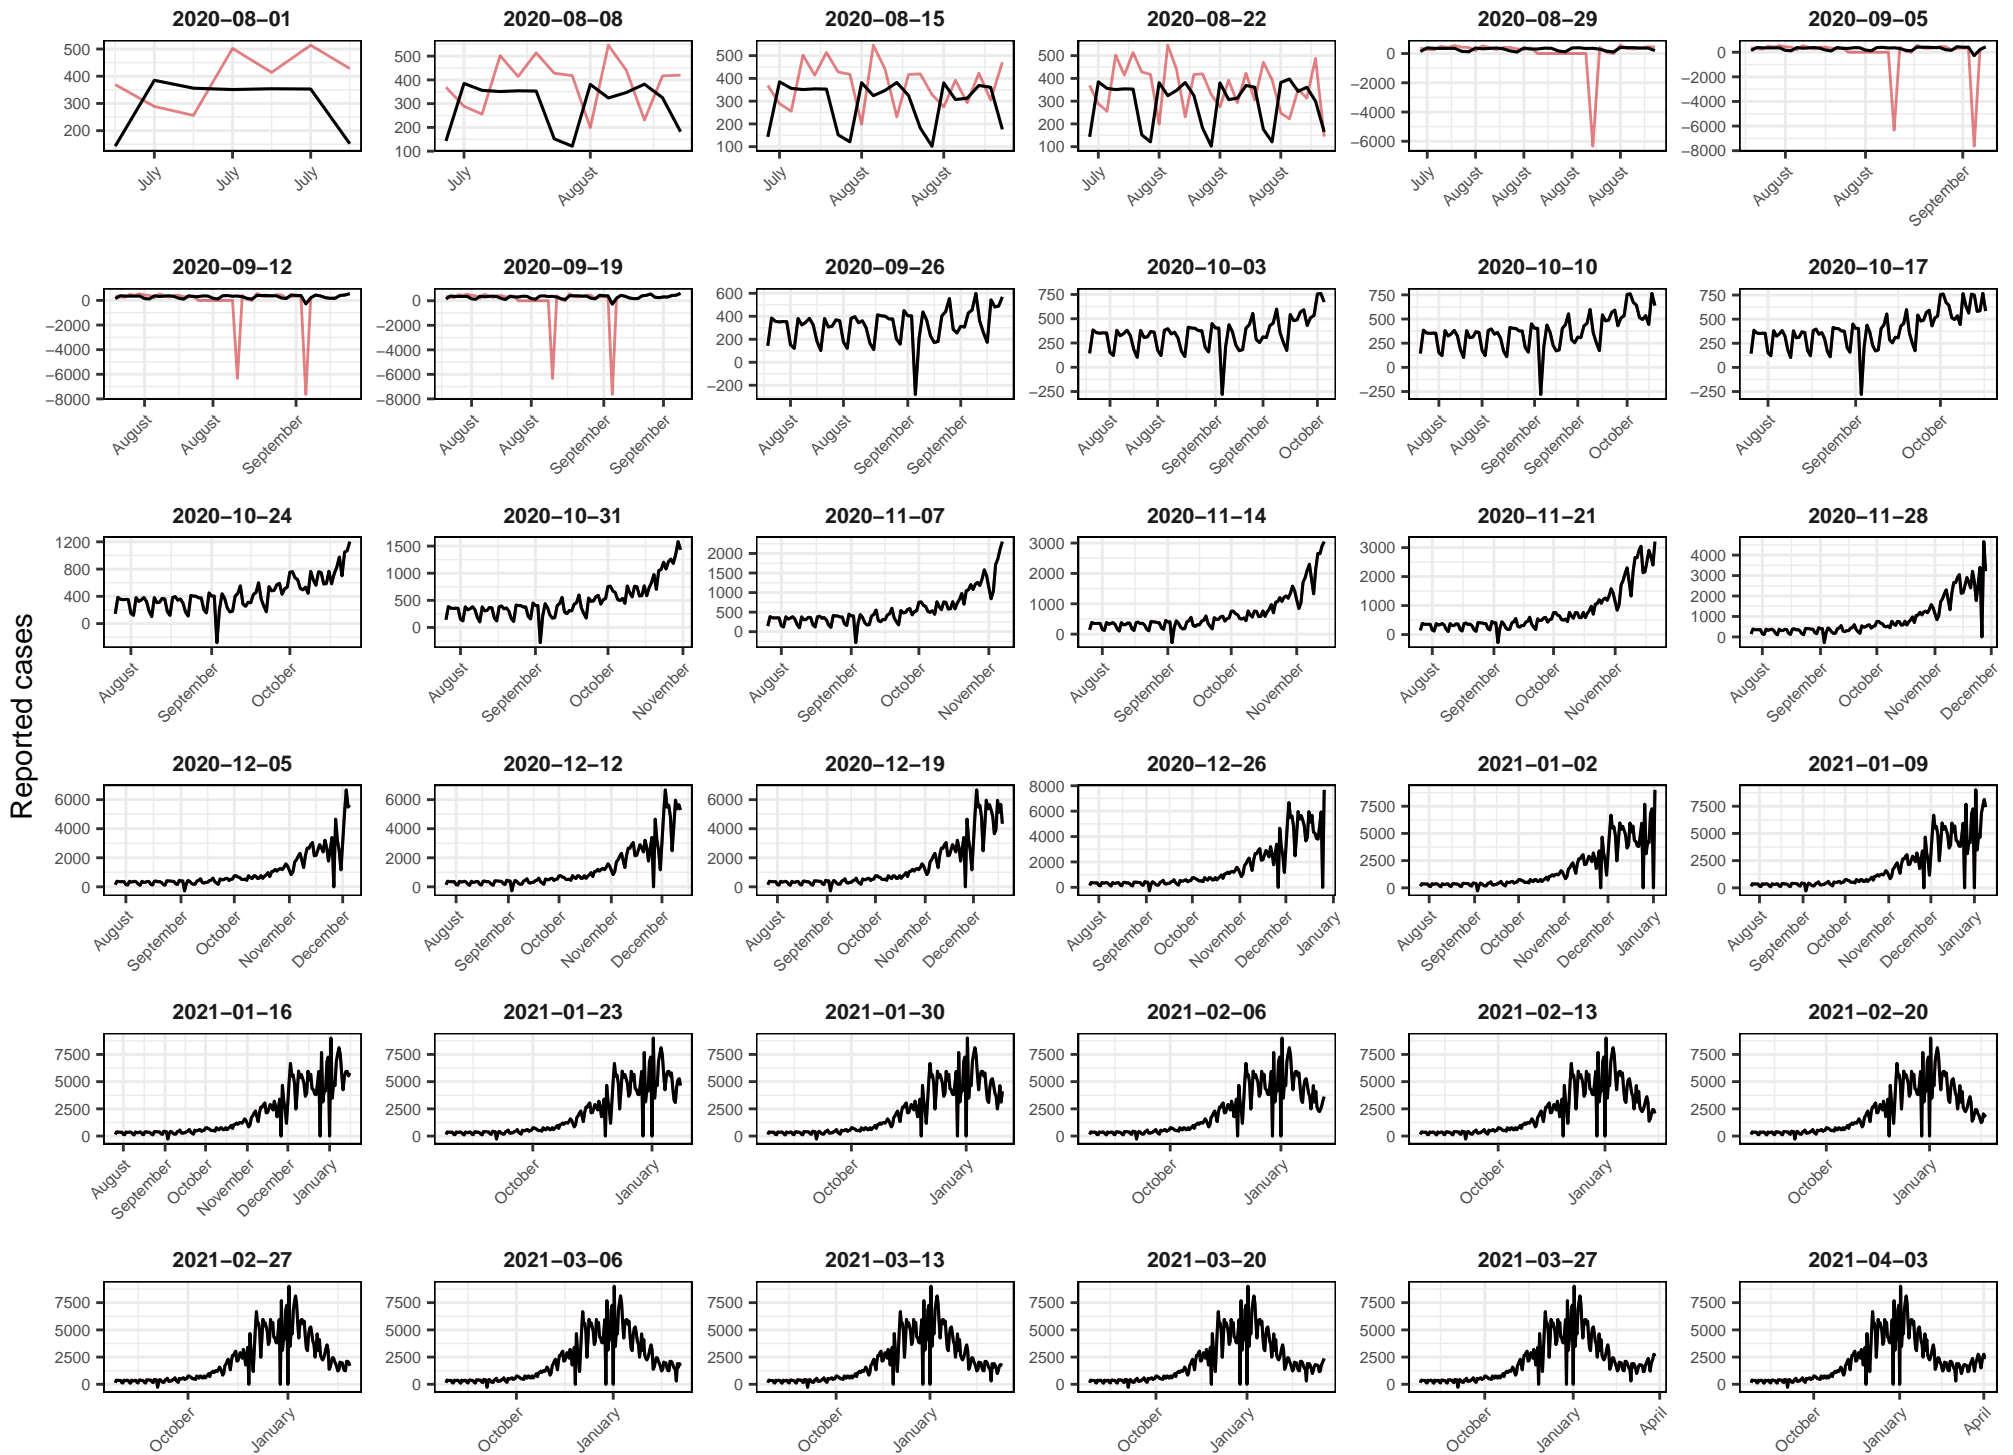

# Massachusetts

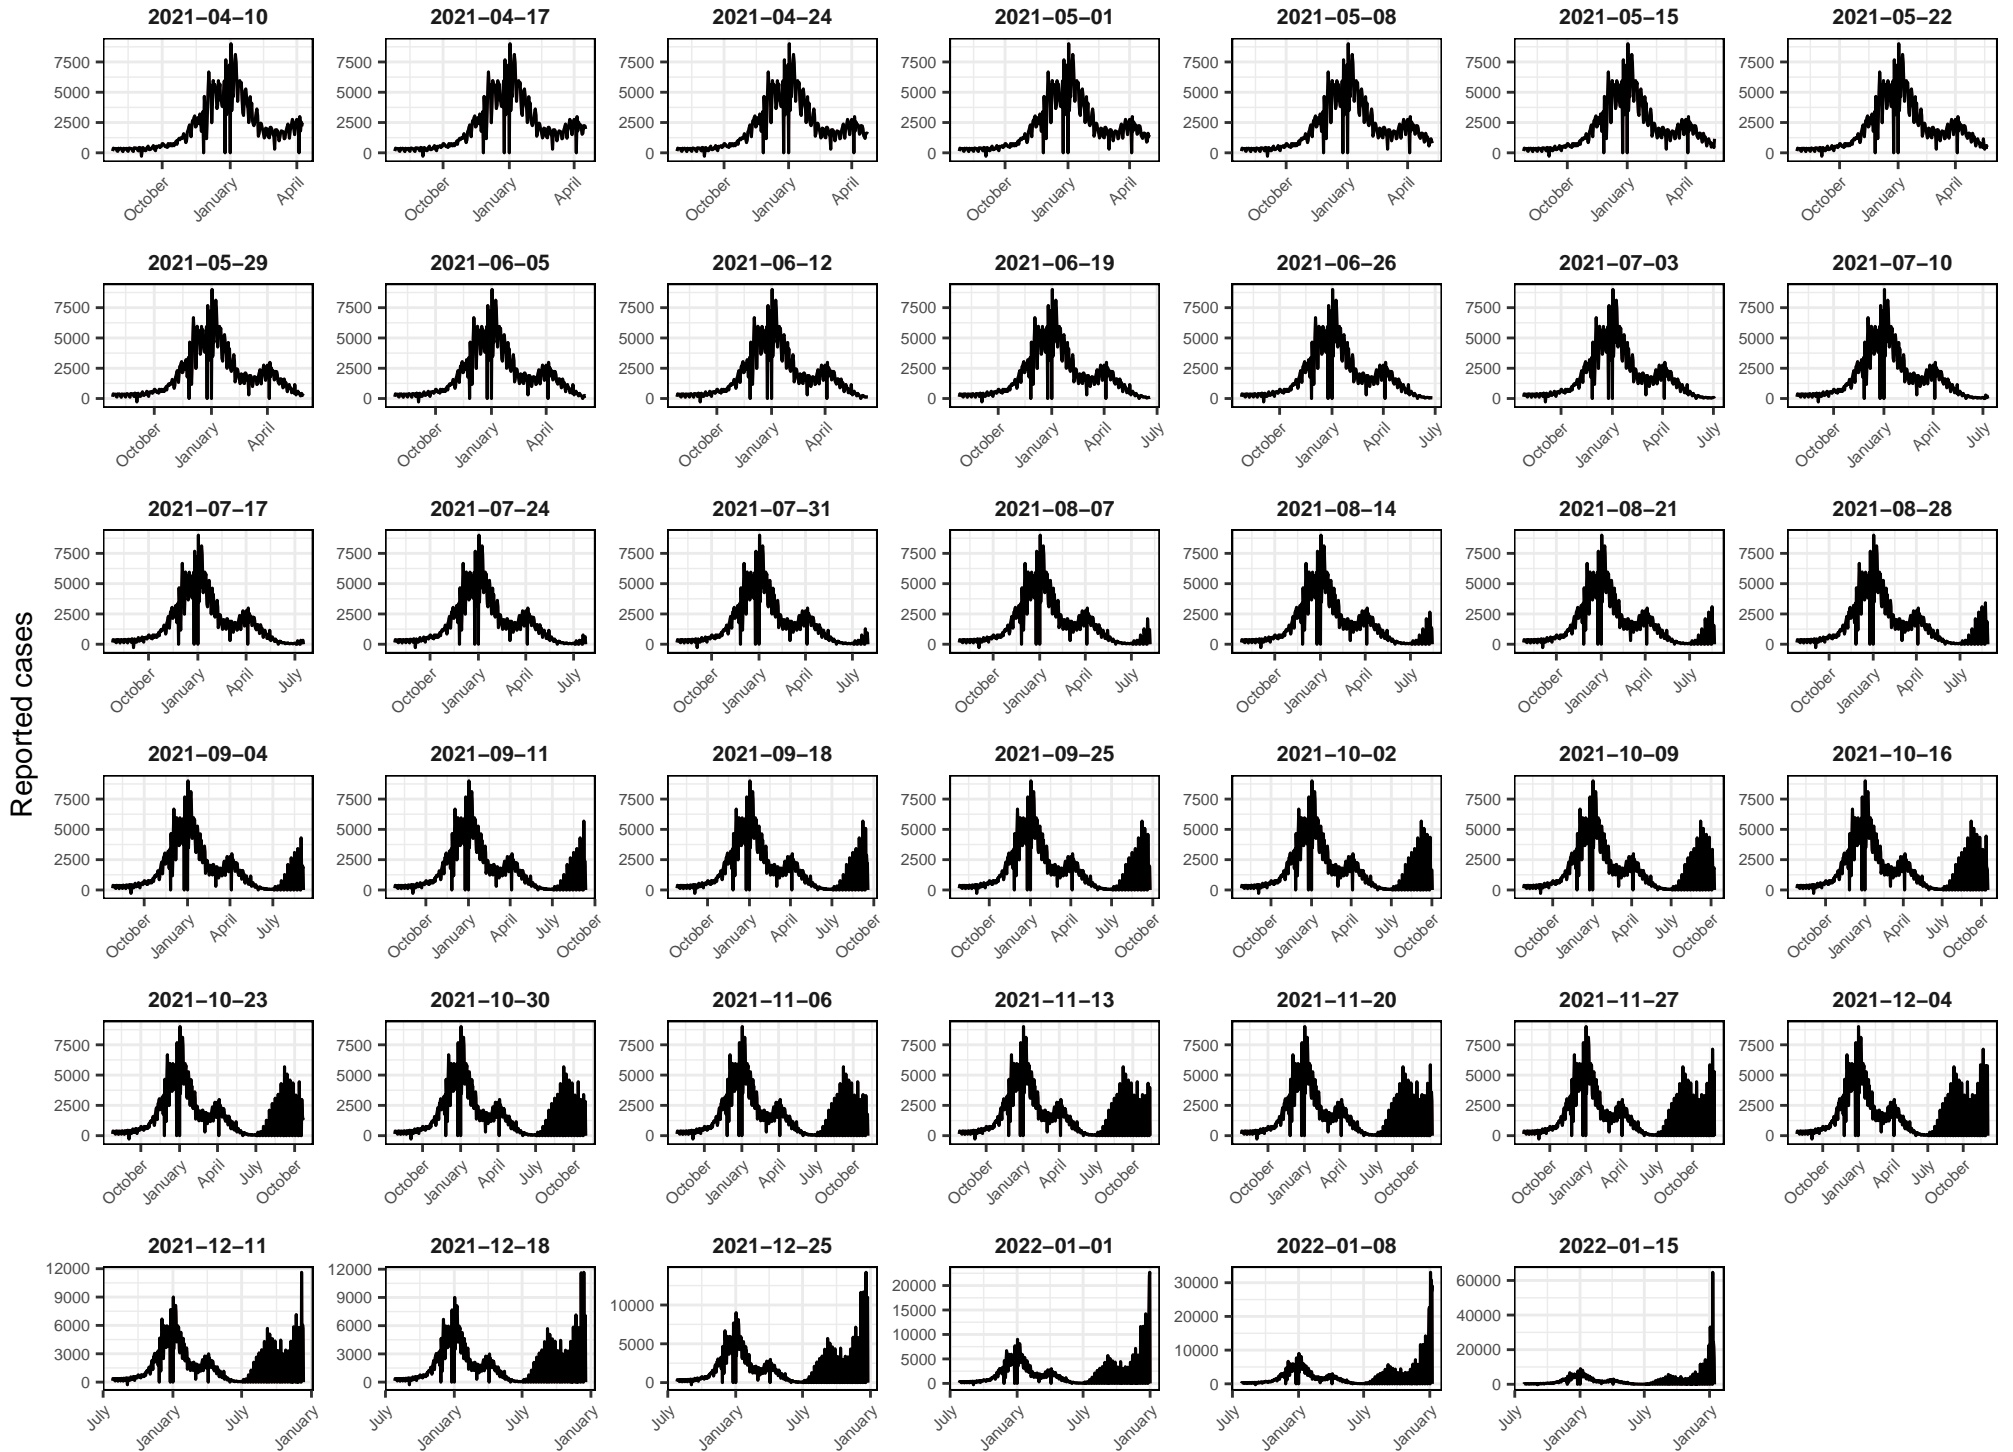

# Michigan

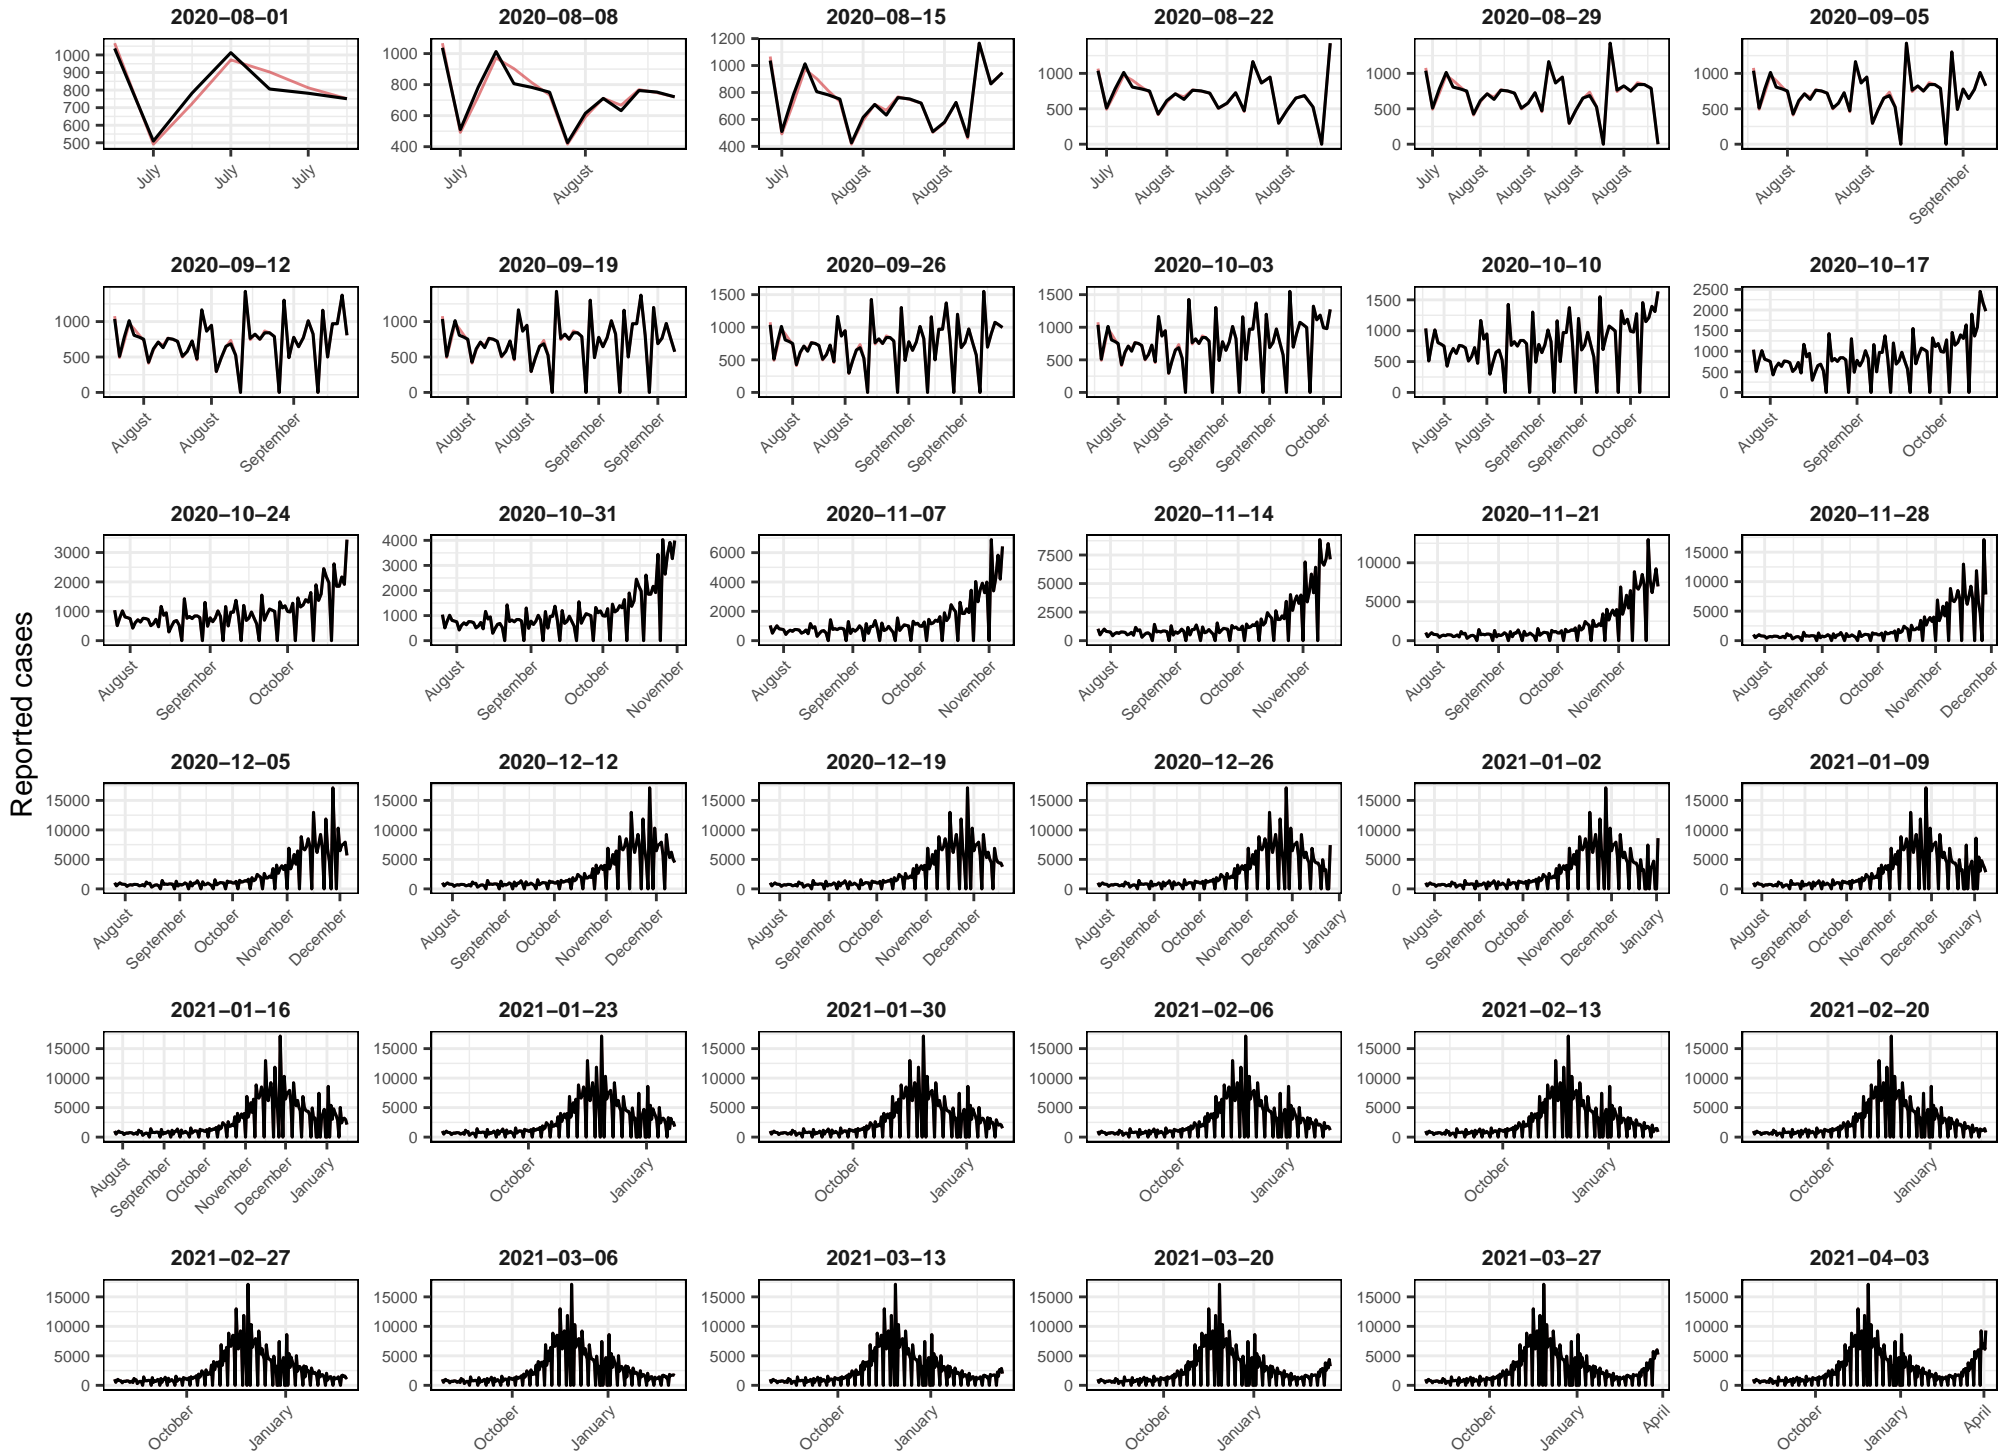

# Michigan

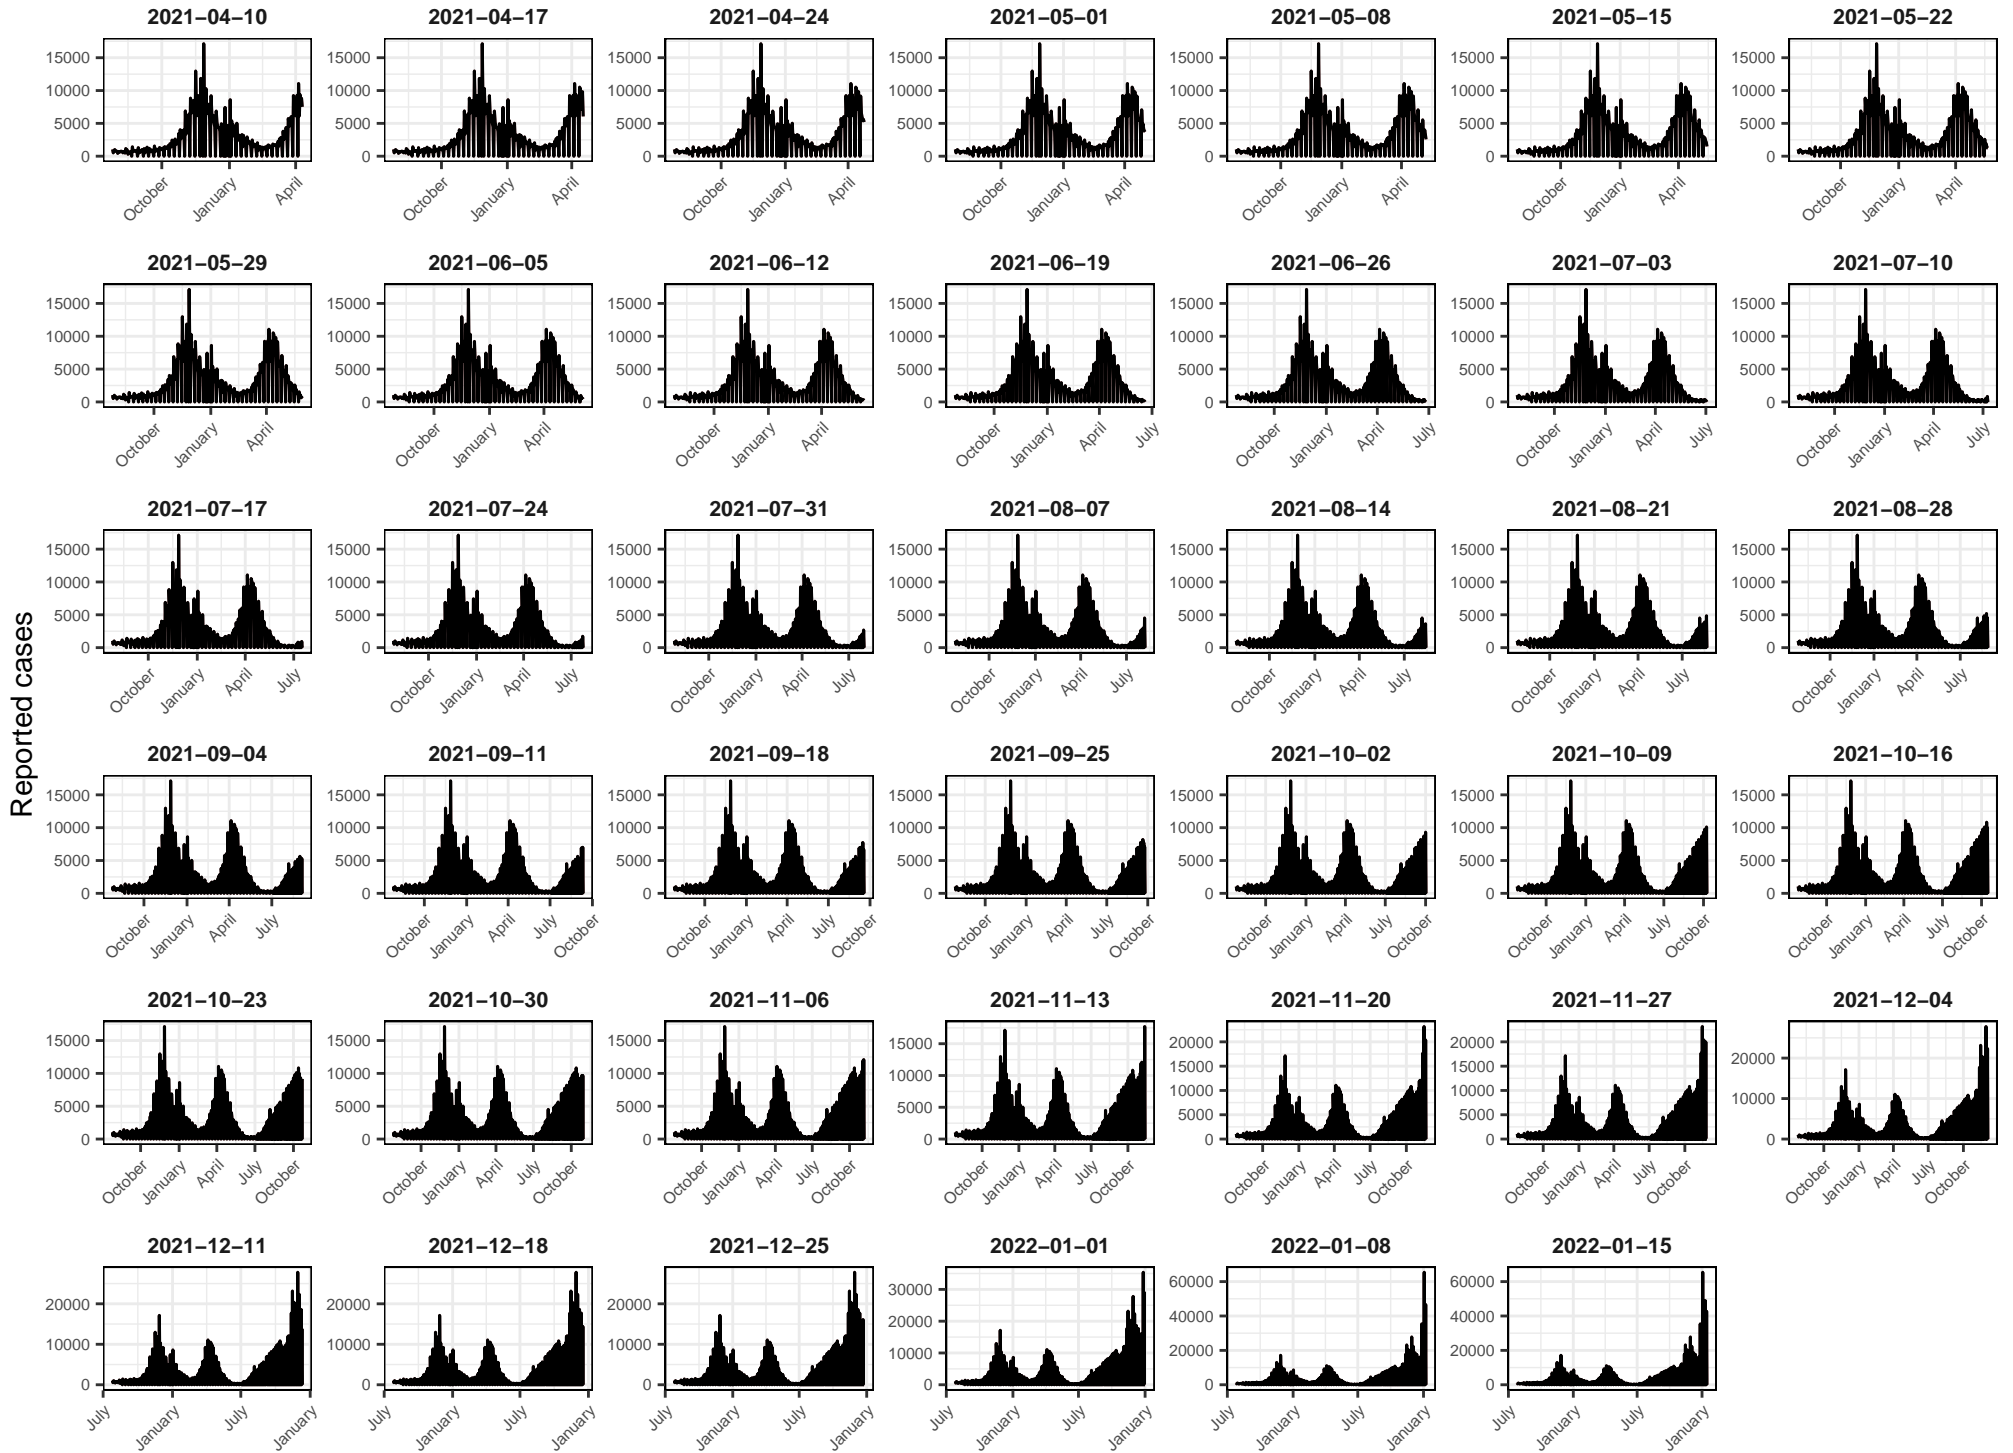

# Minnesota

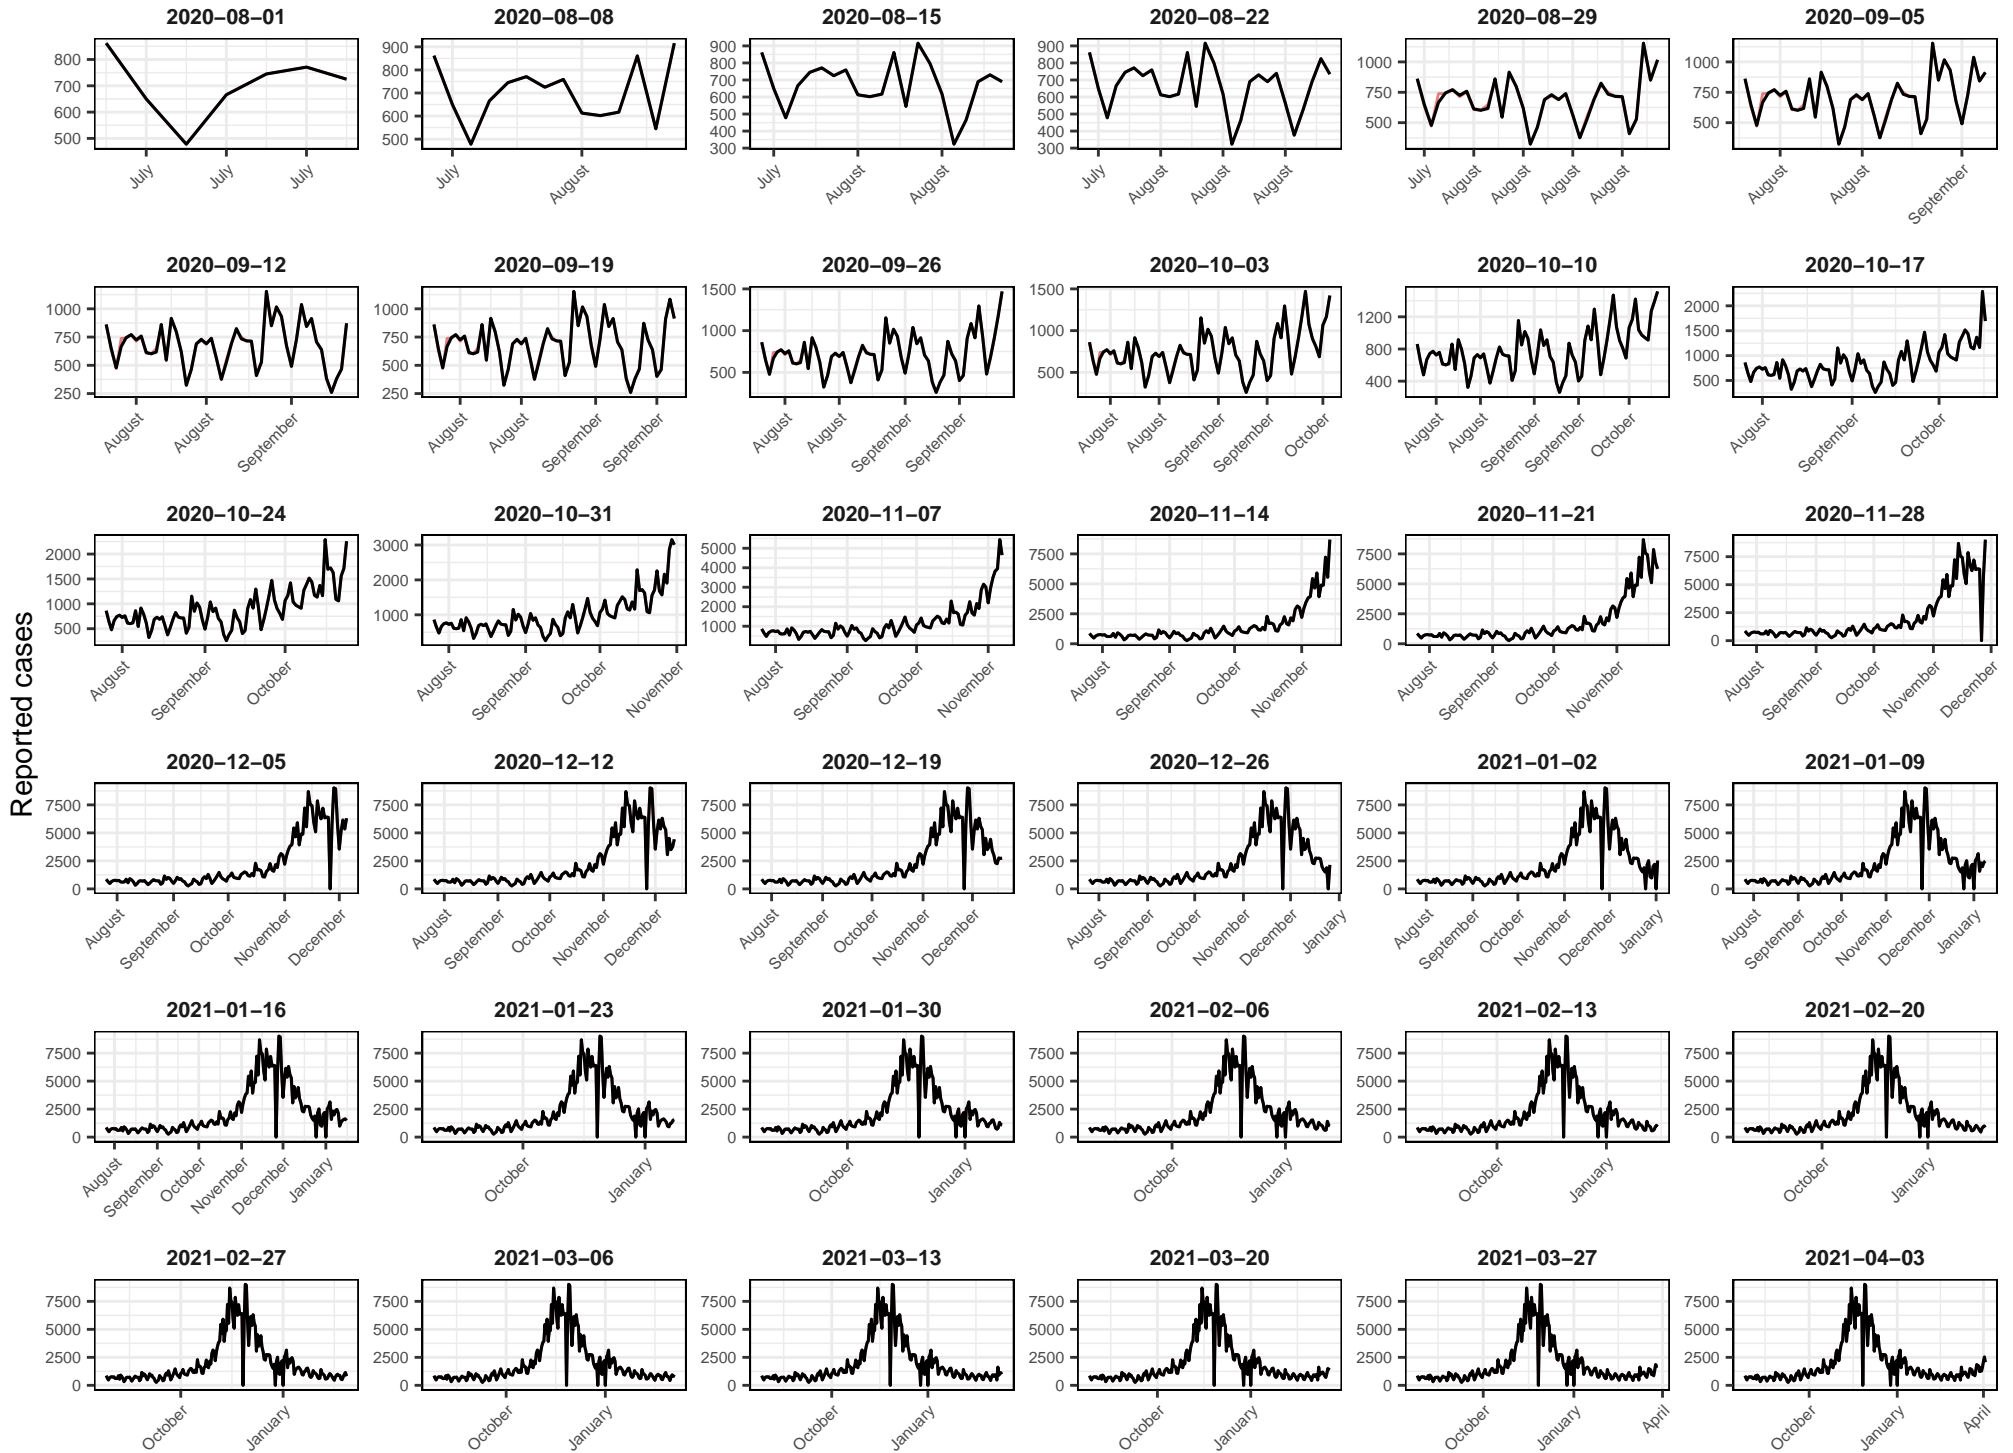

# Minnesota

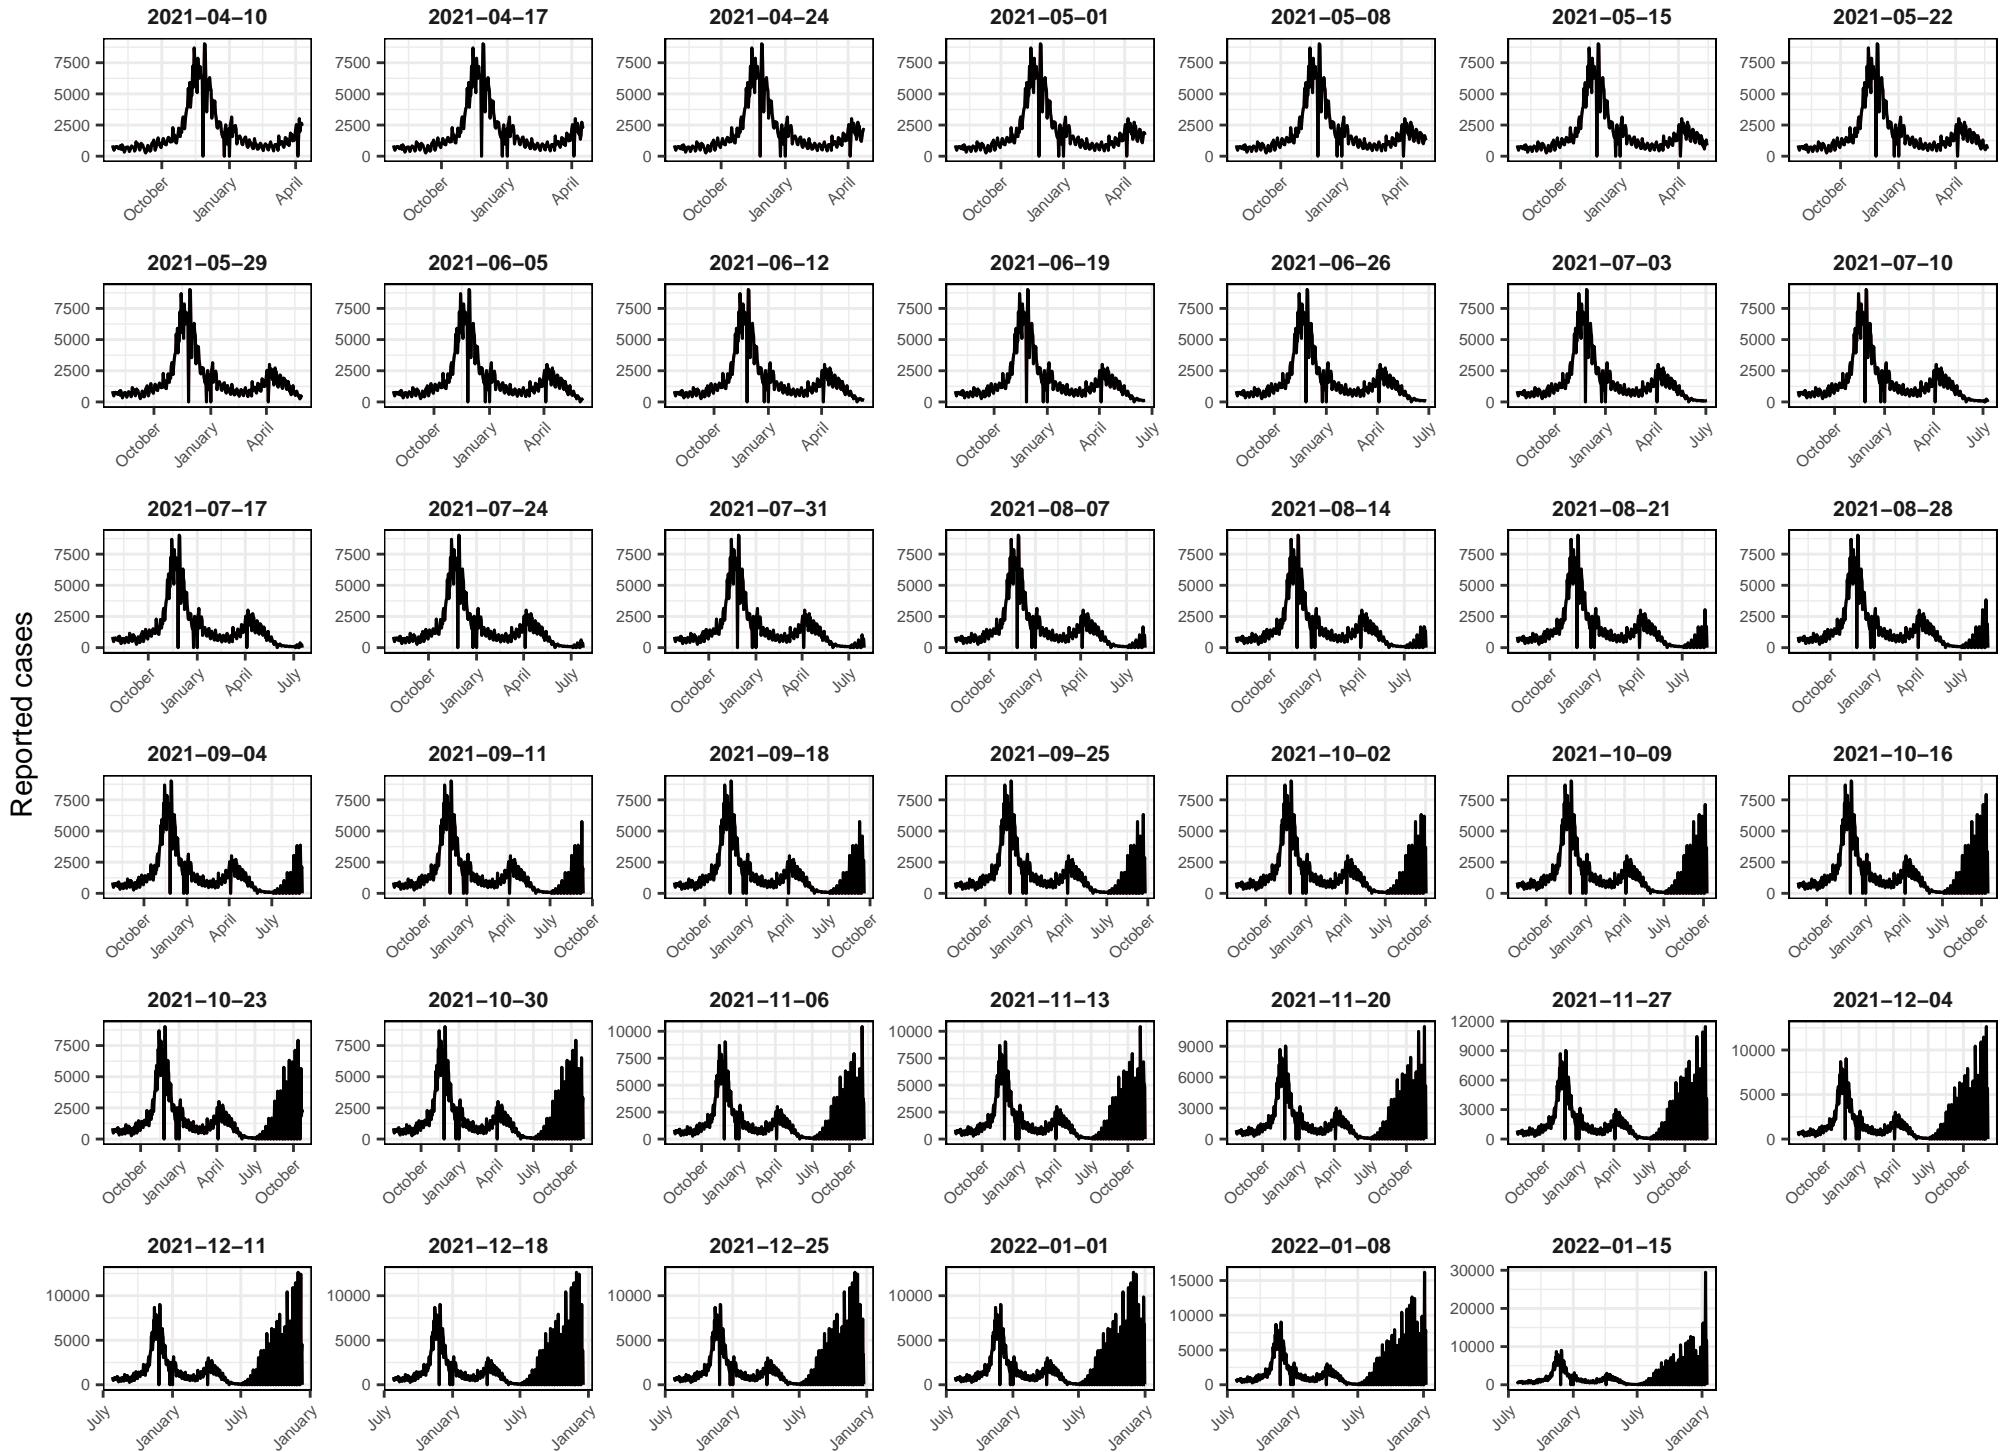



# Mississippi

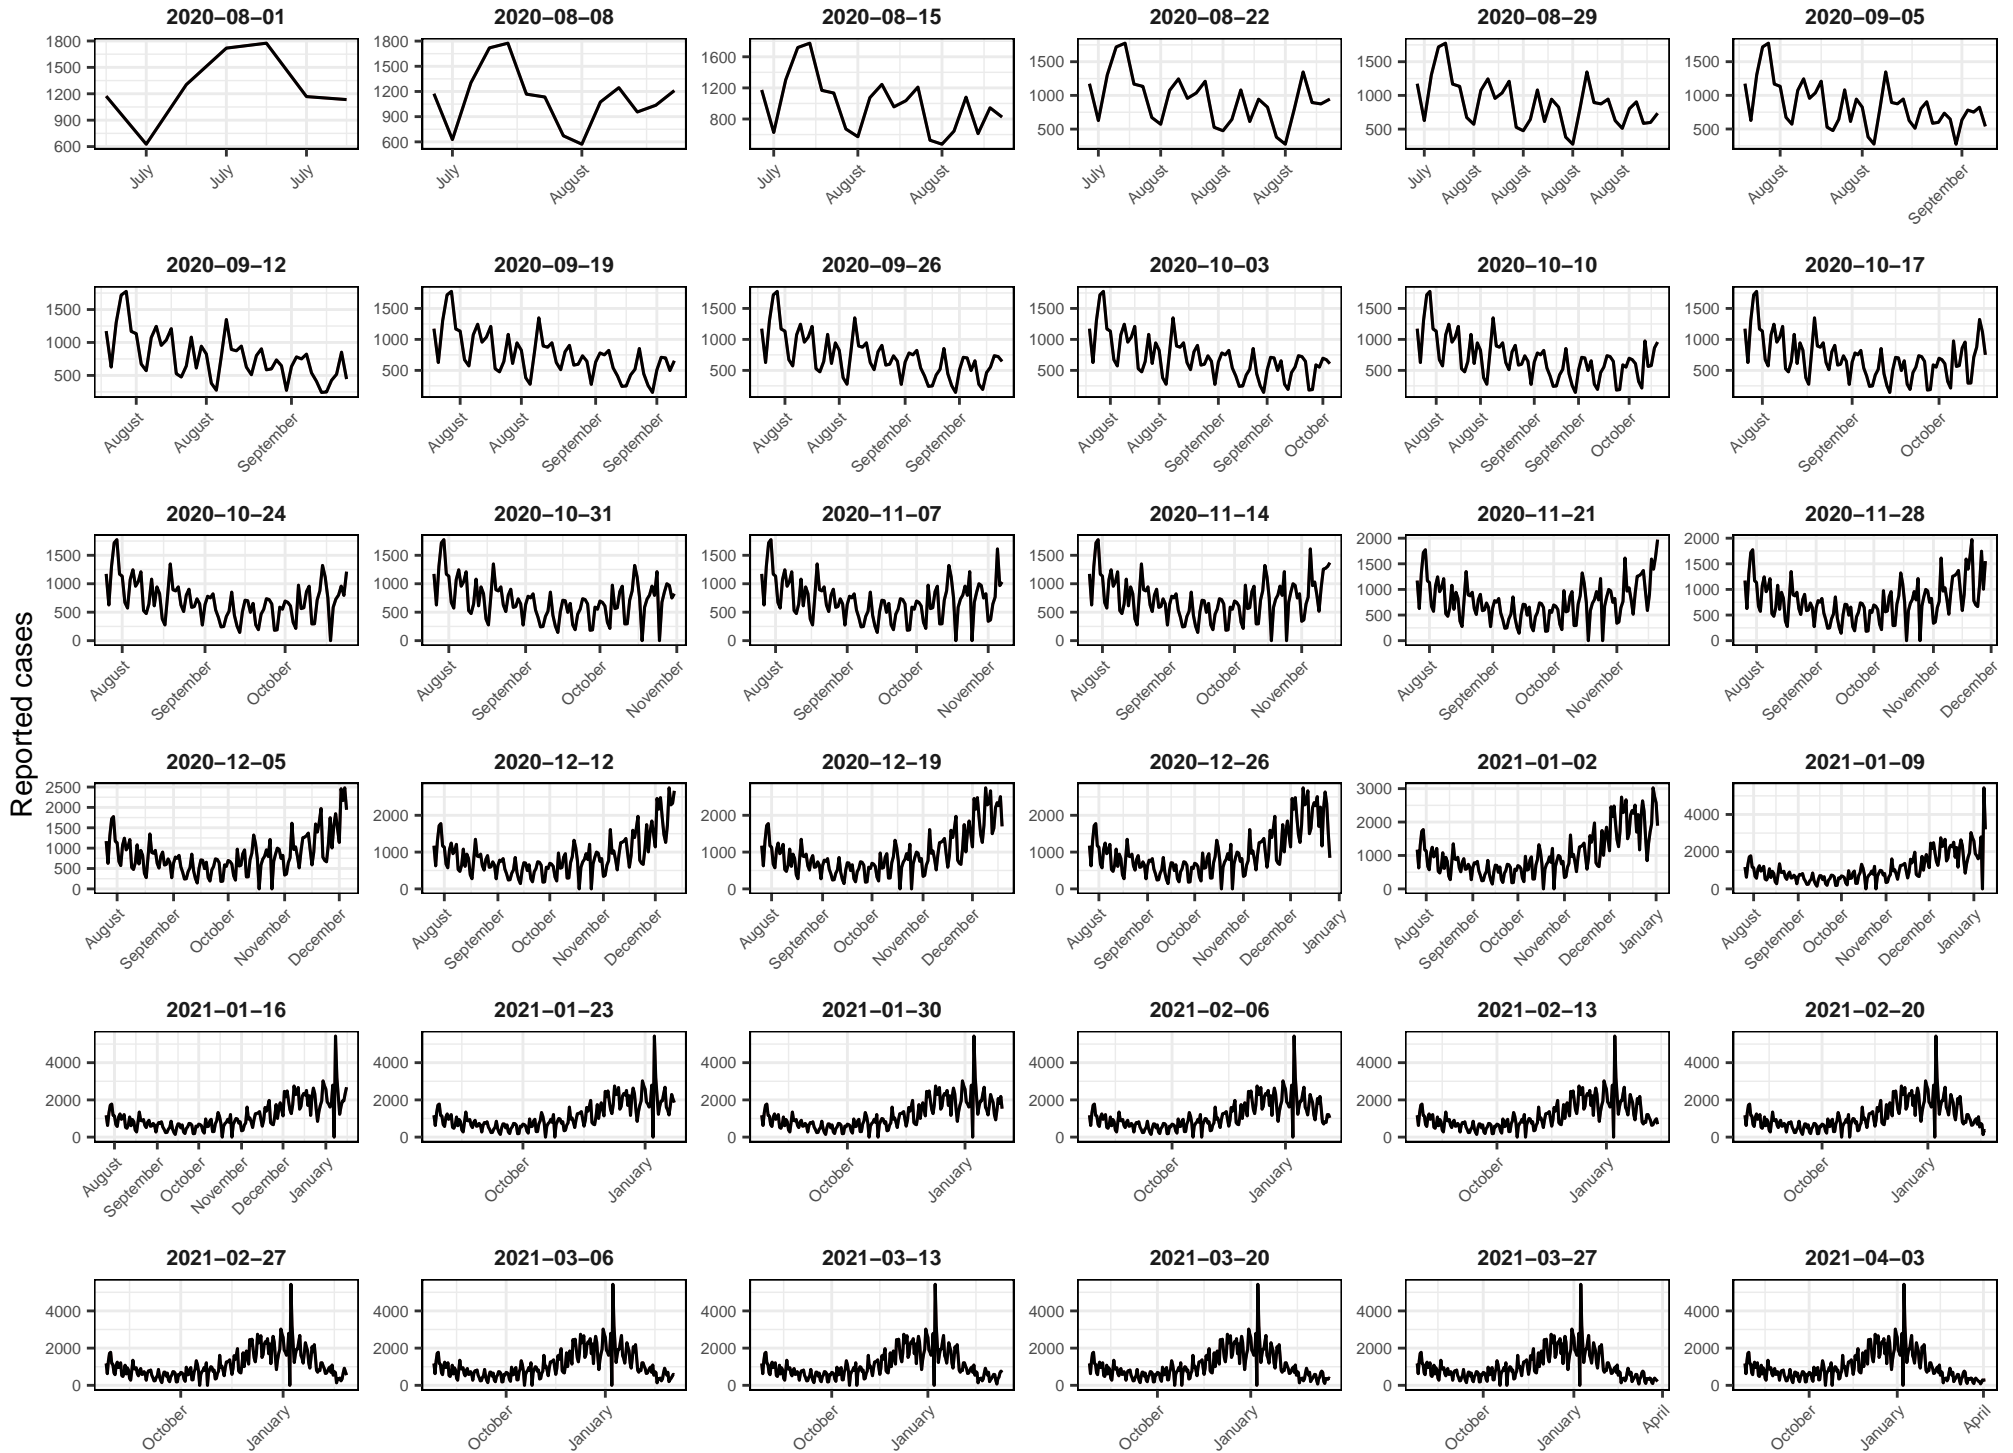

# Mississippi

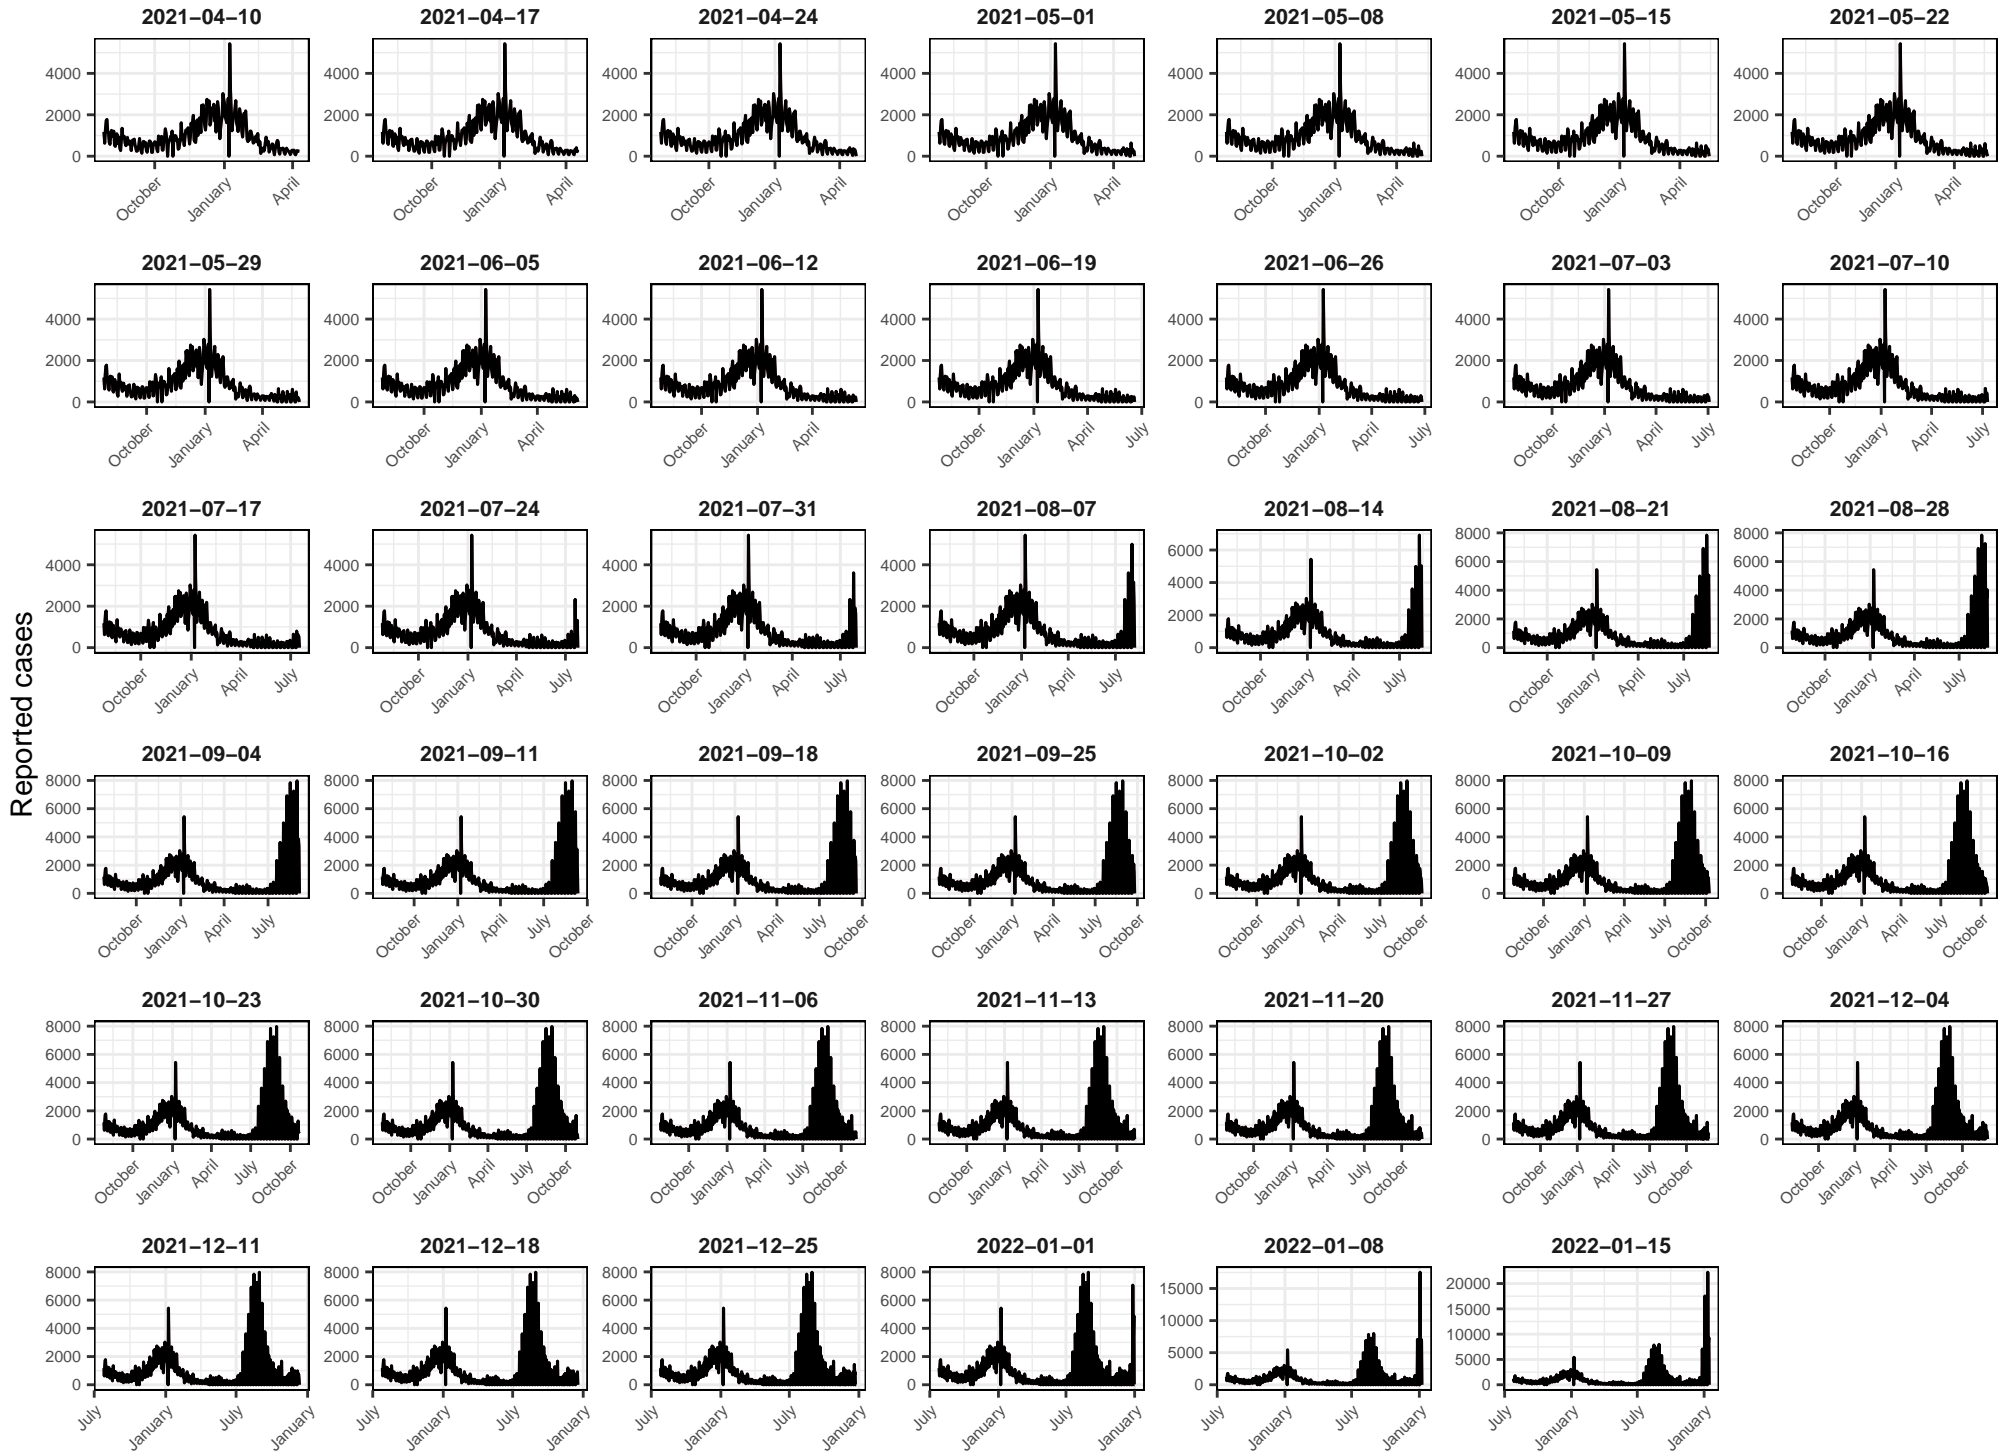

# Missouri

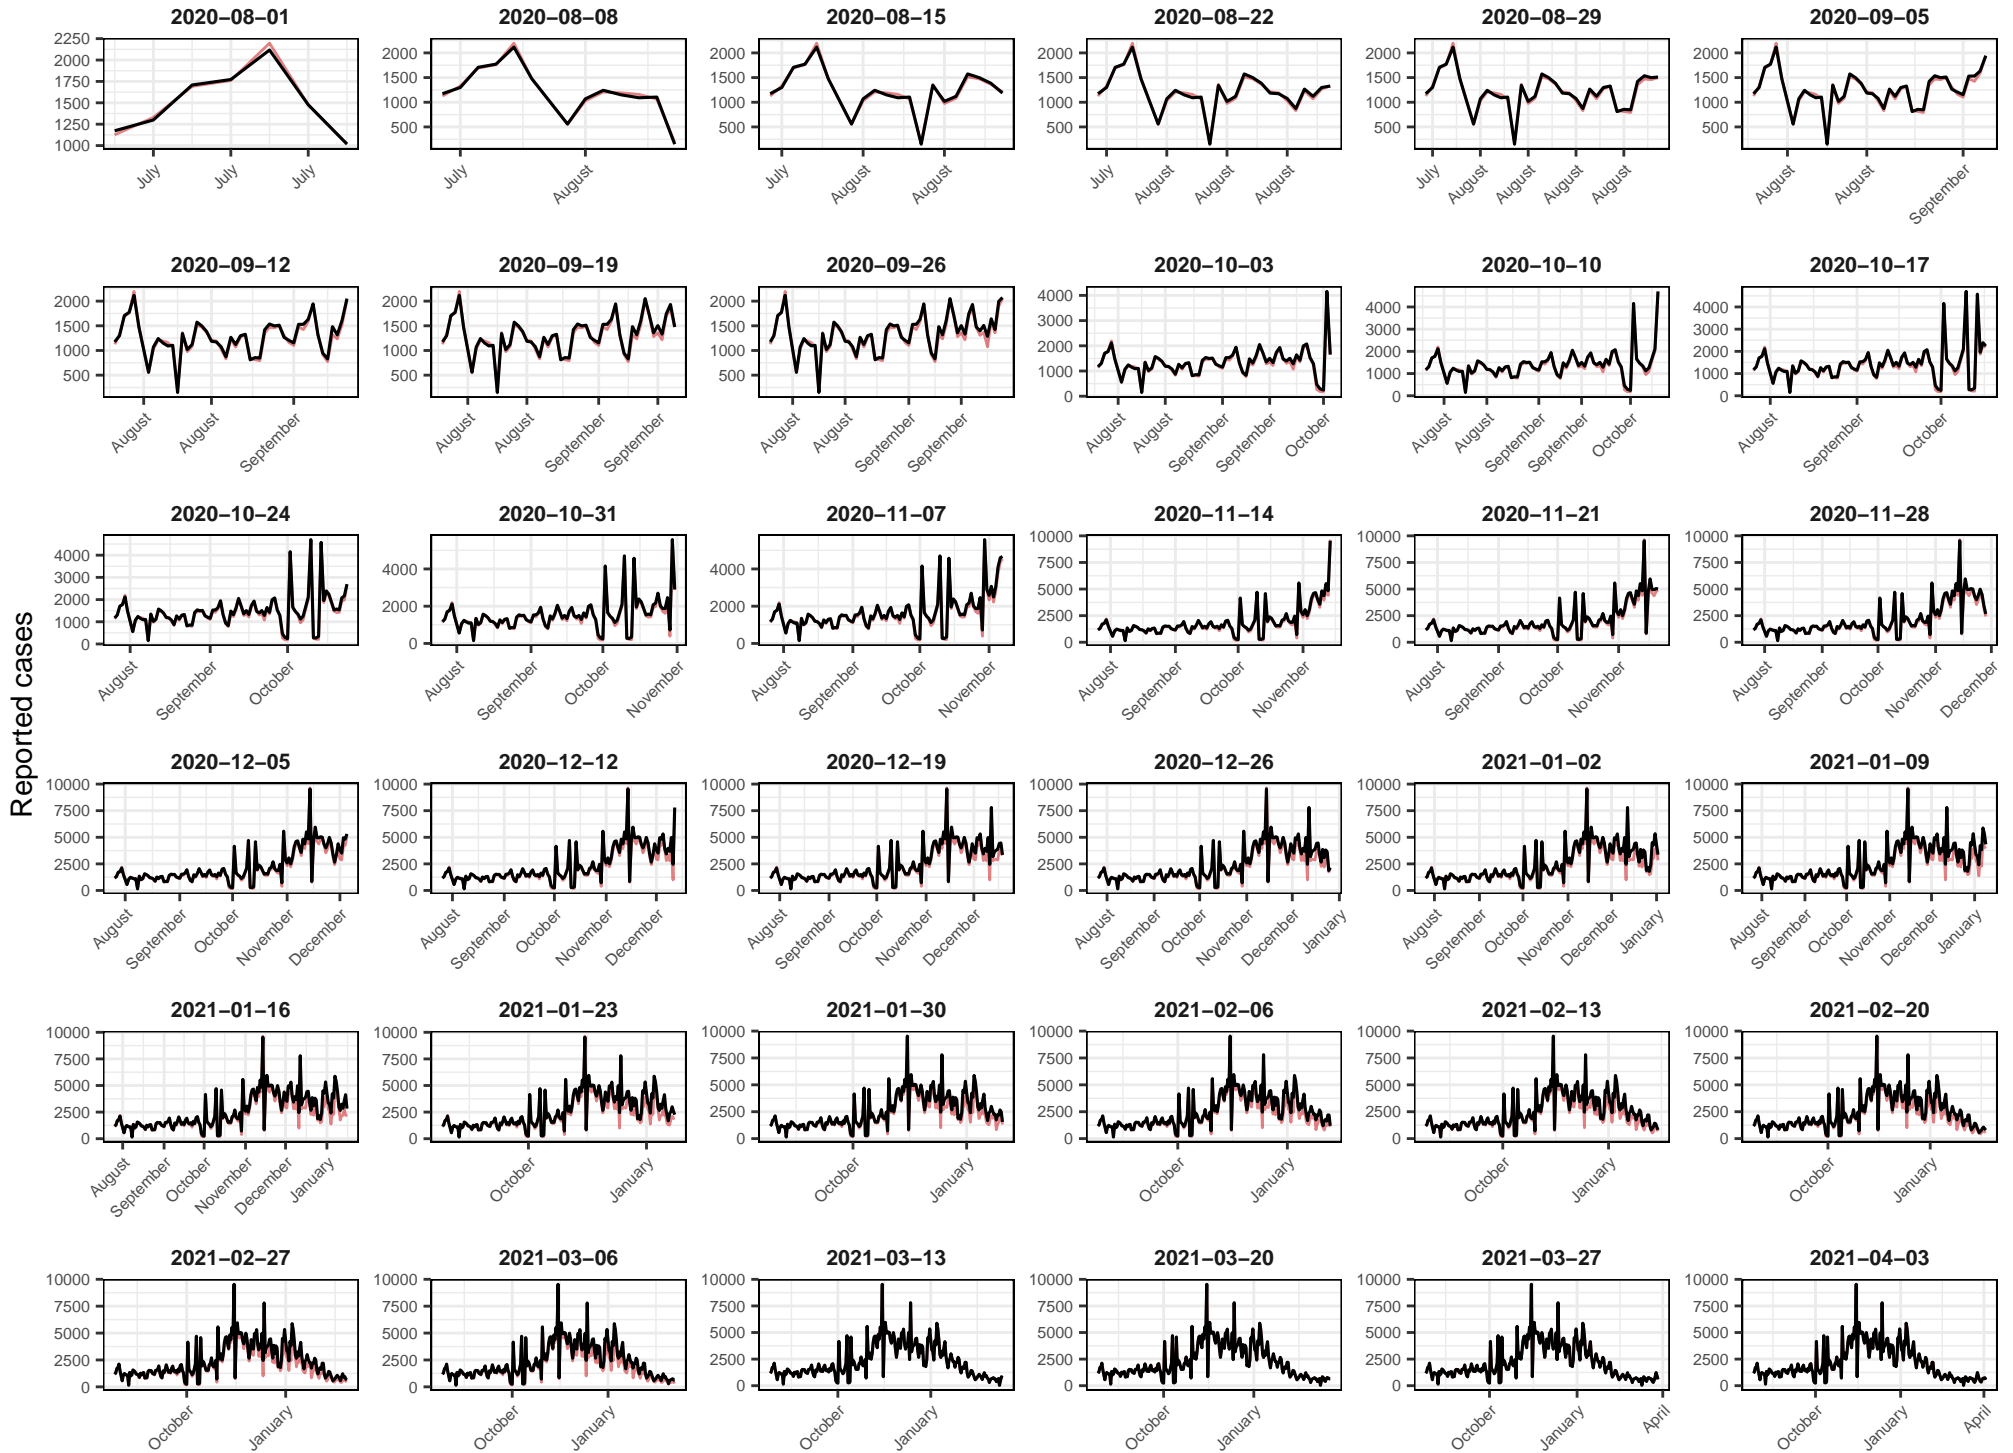

# Missouri

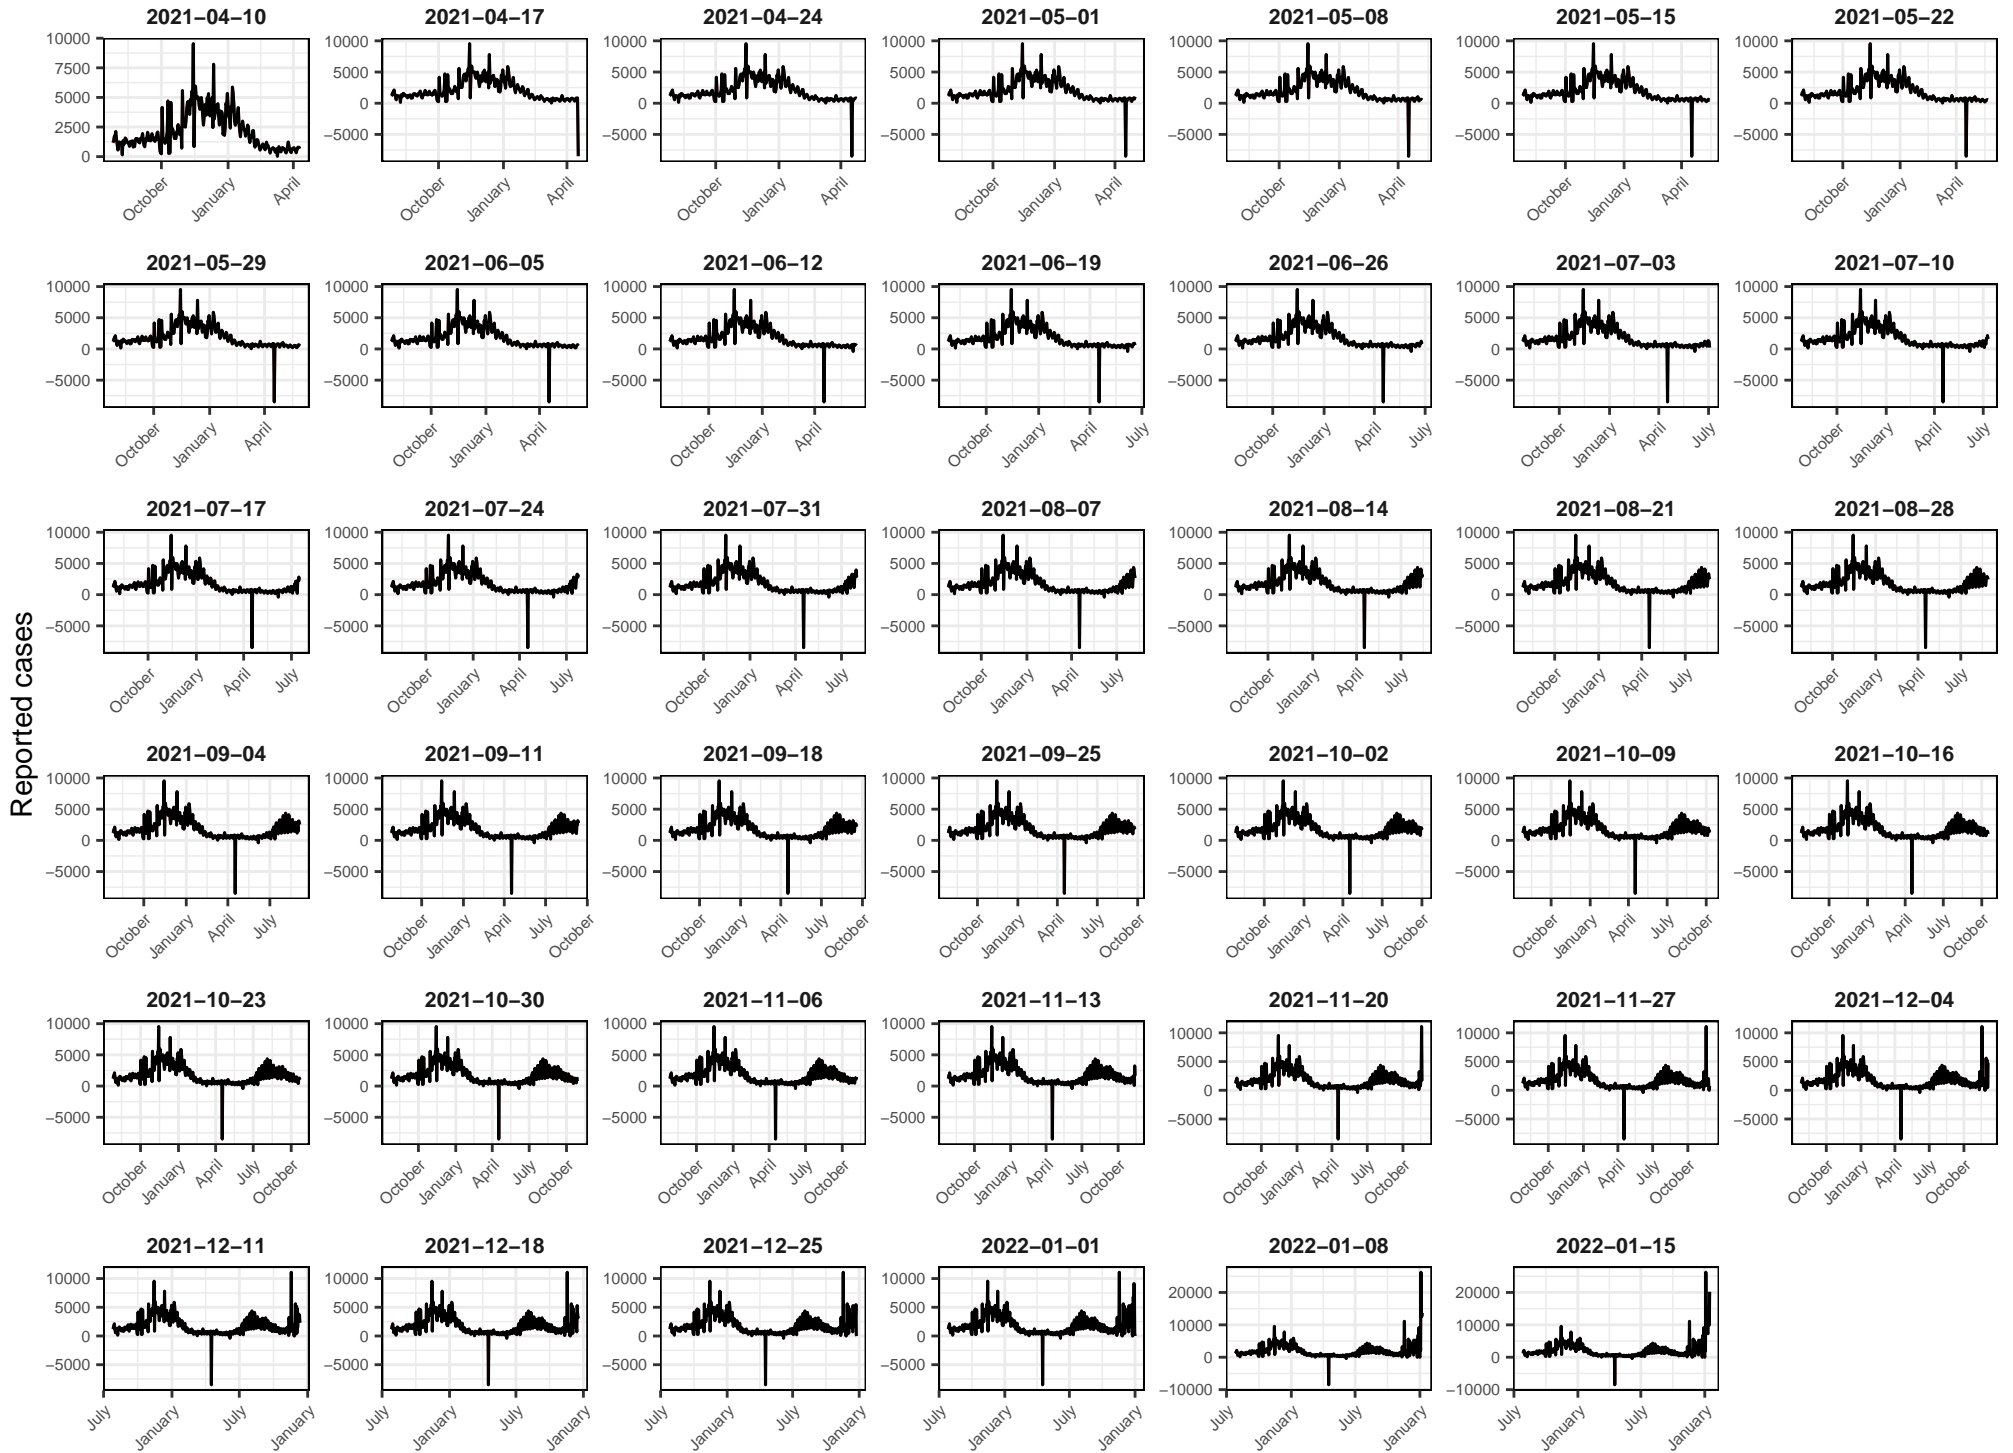

# Montana

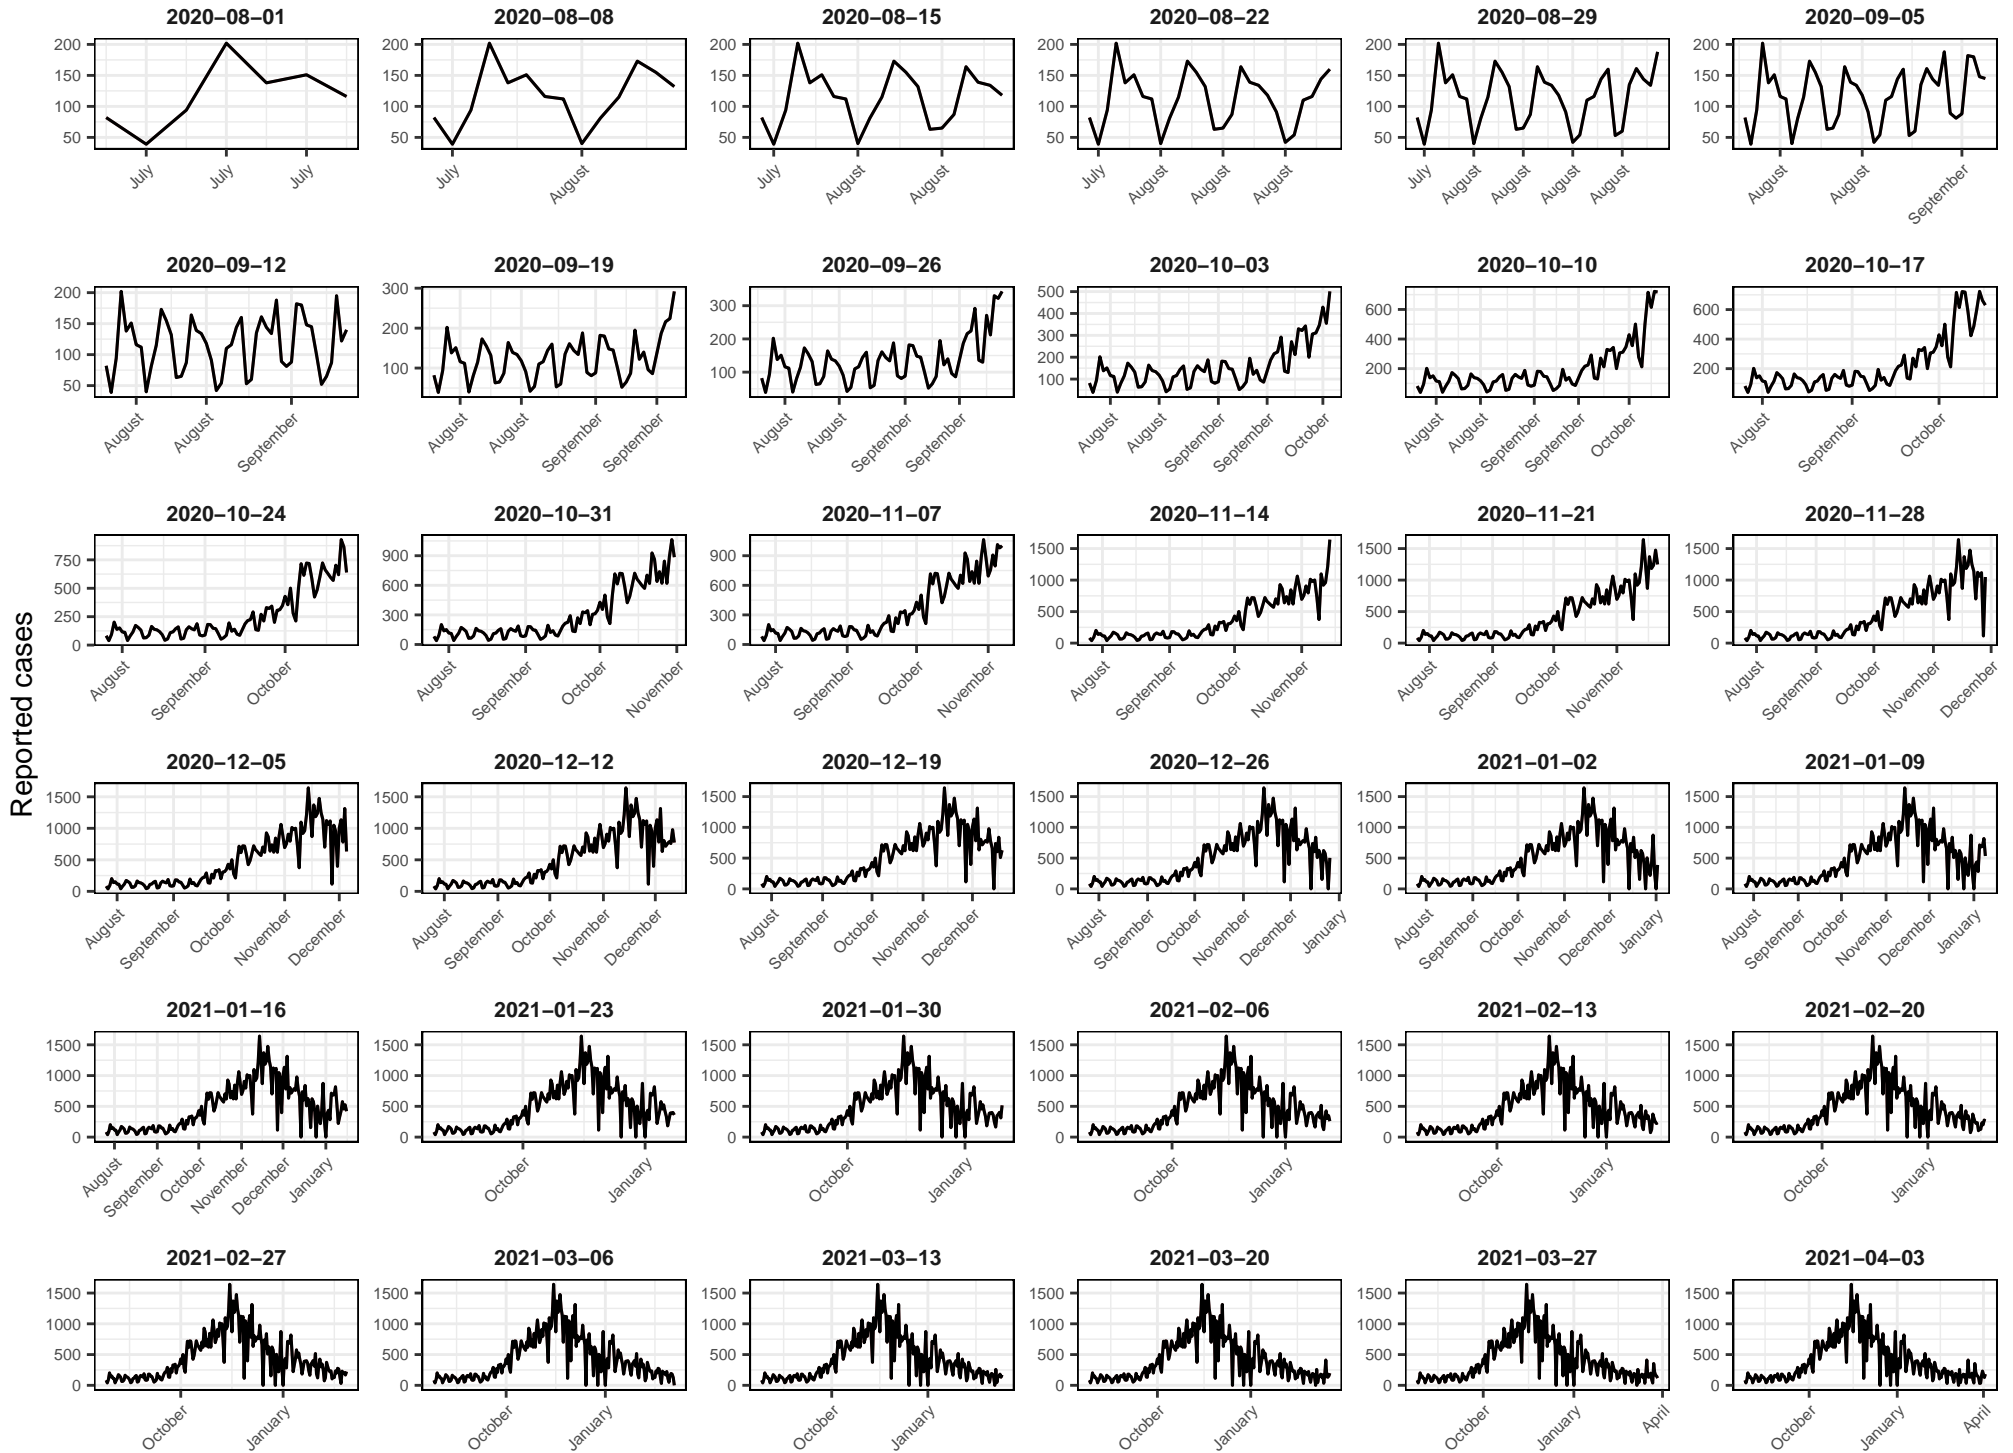

# Montana

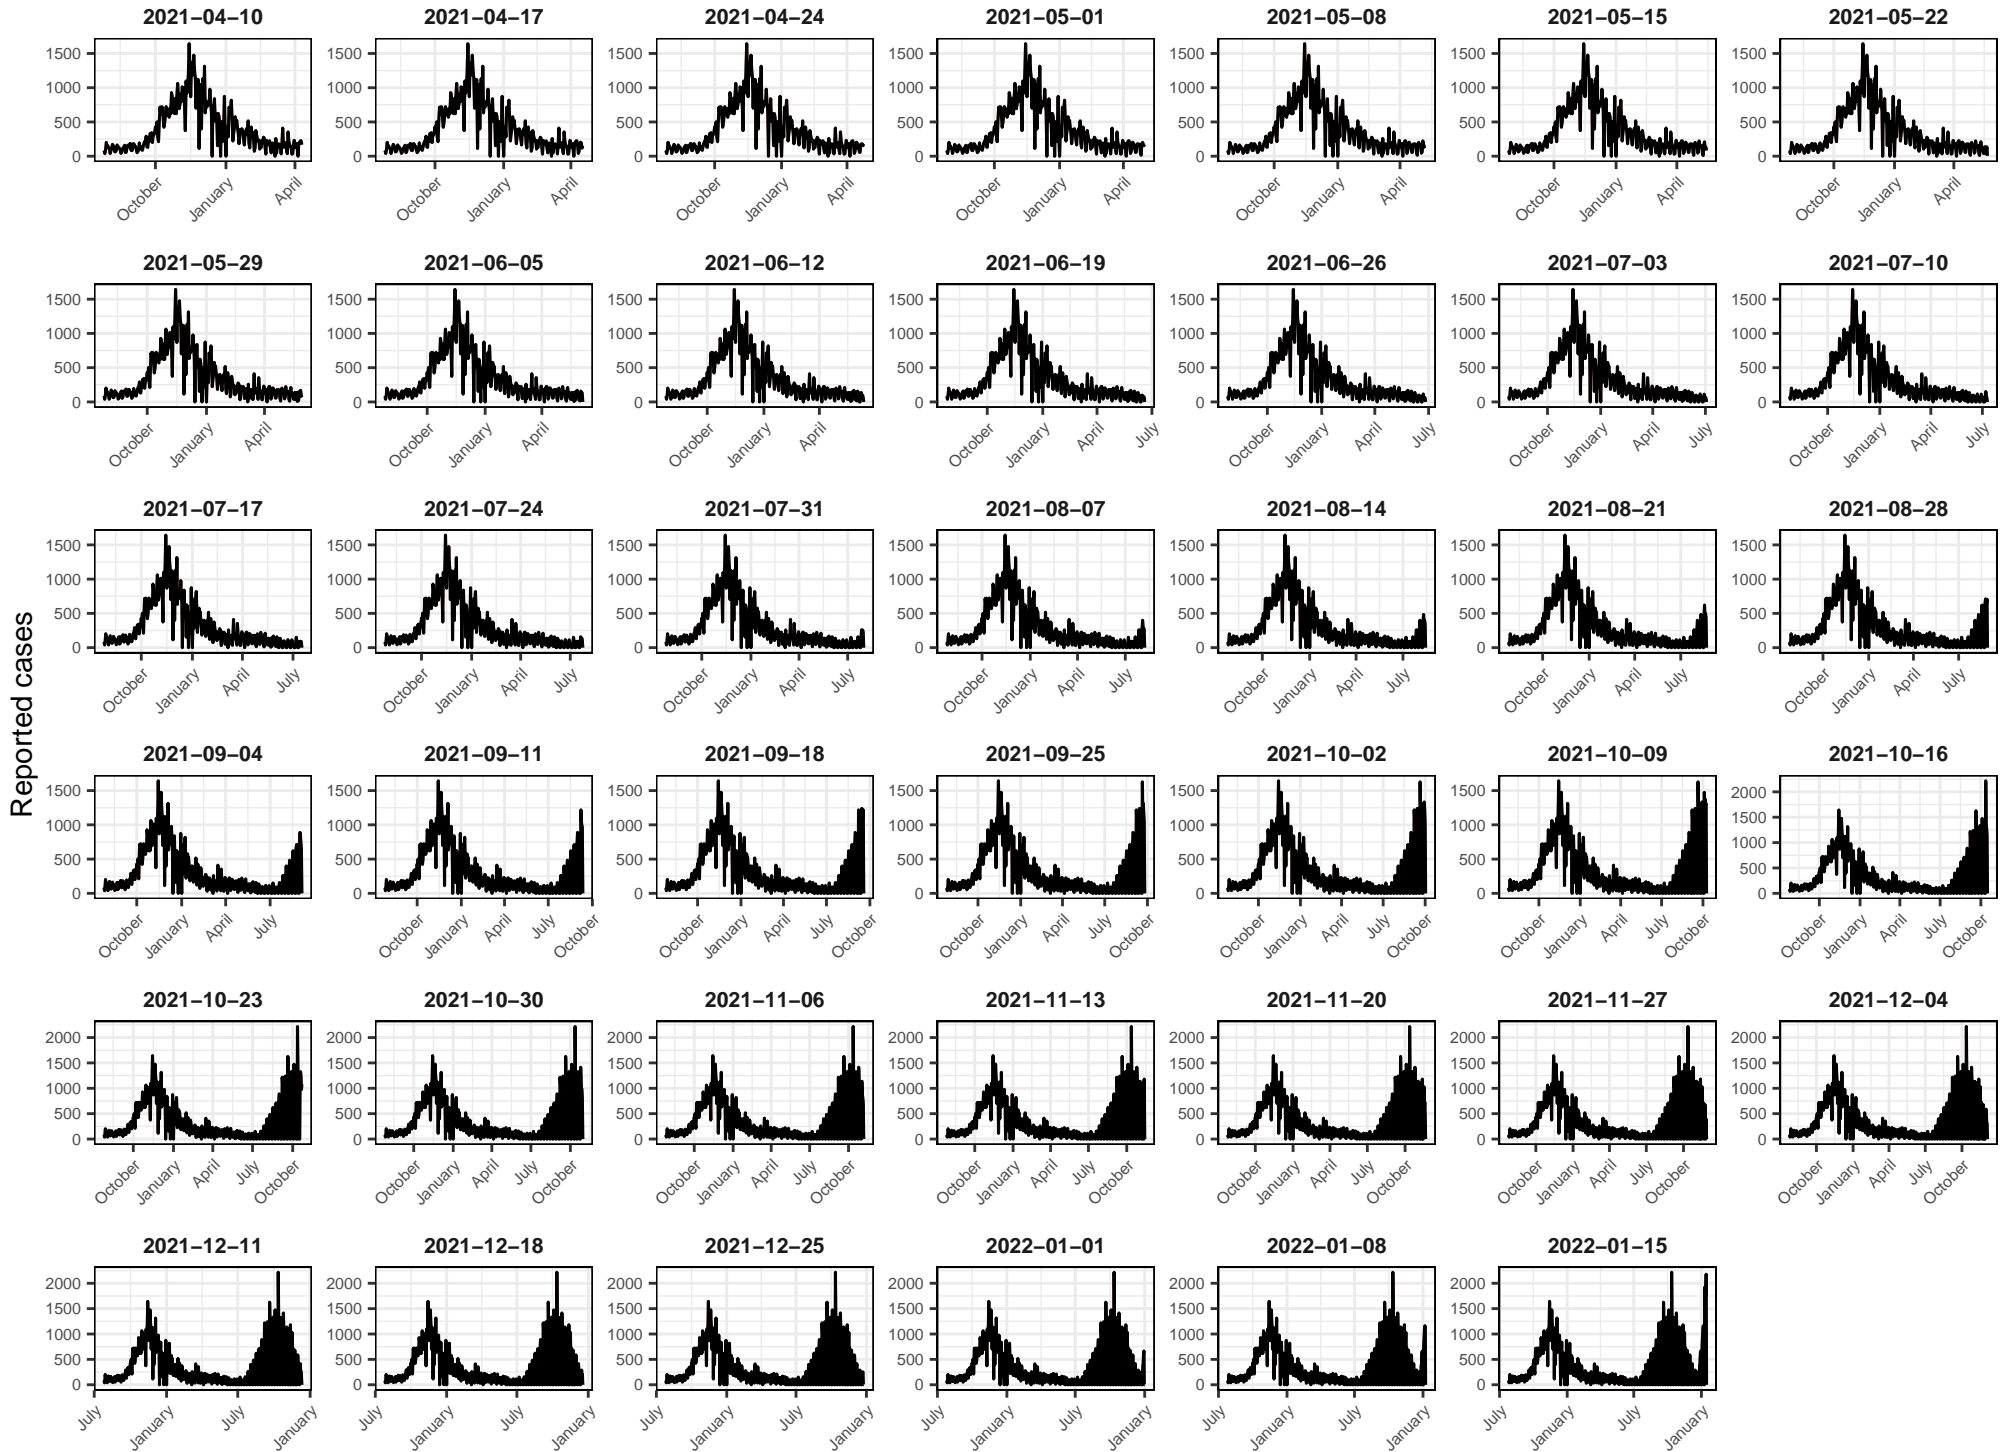

# Nebraska

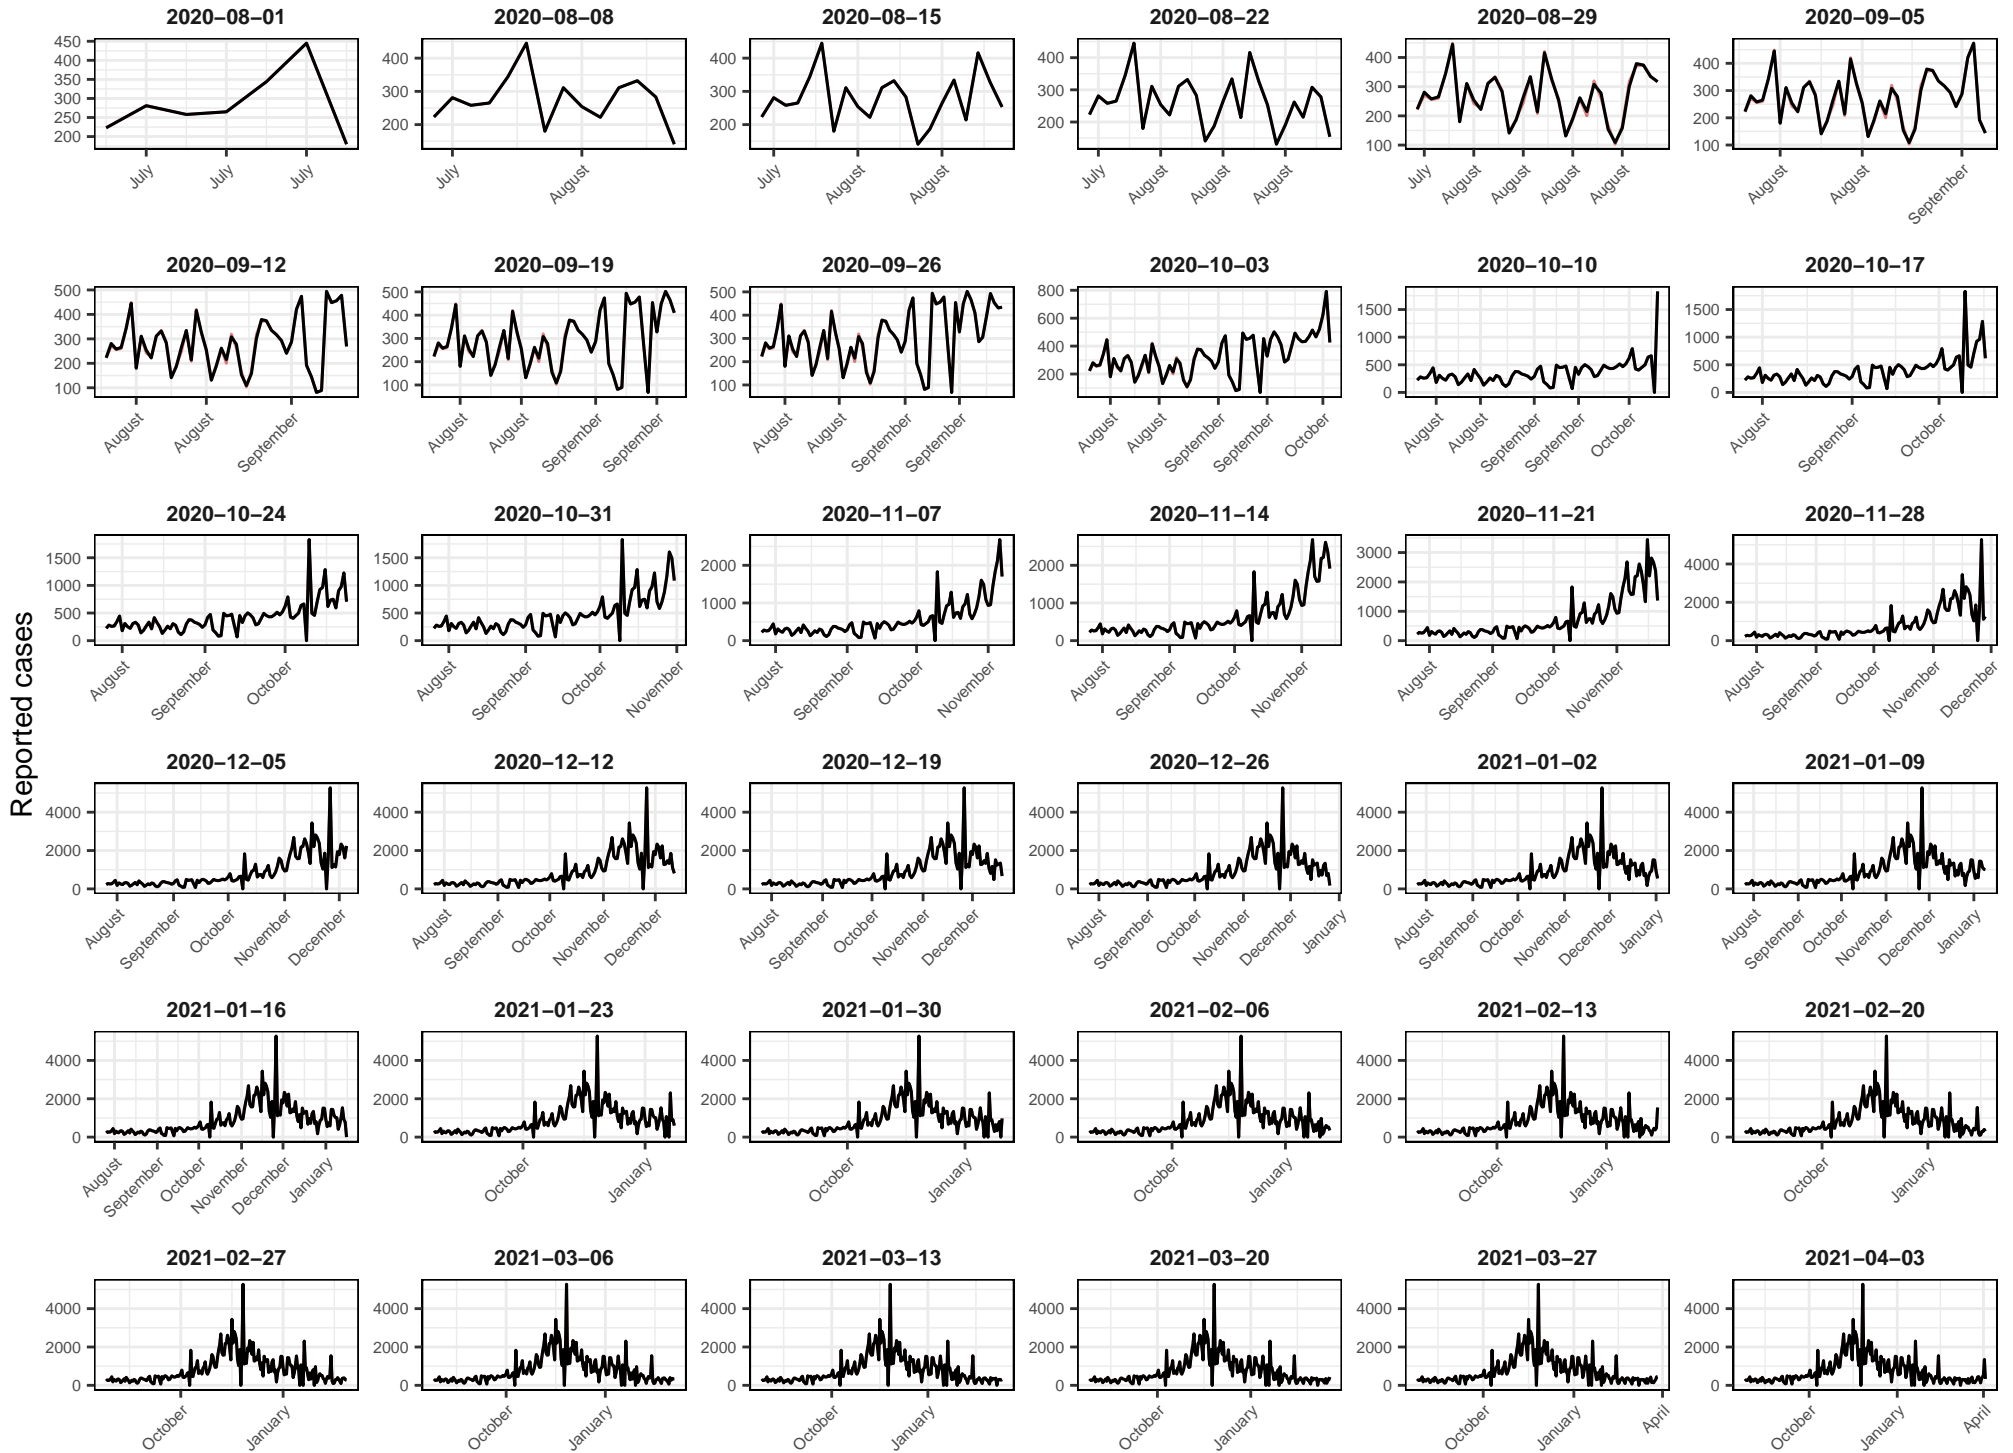

# Nebraska

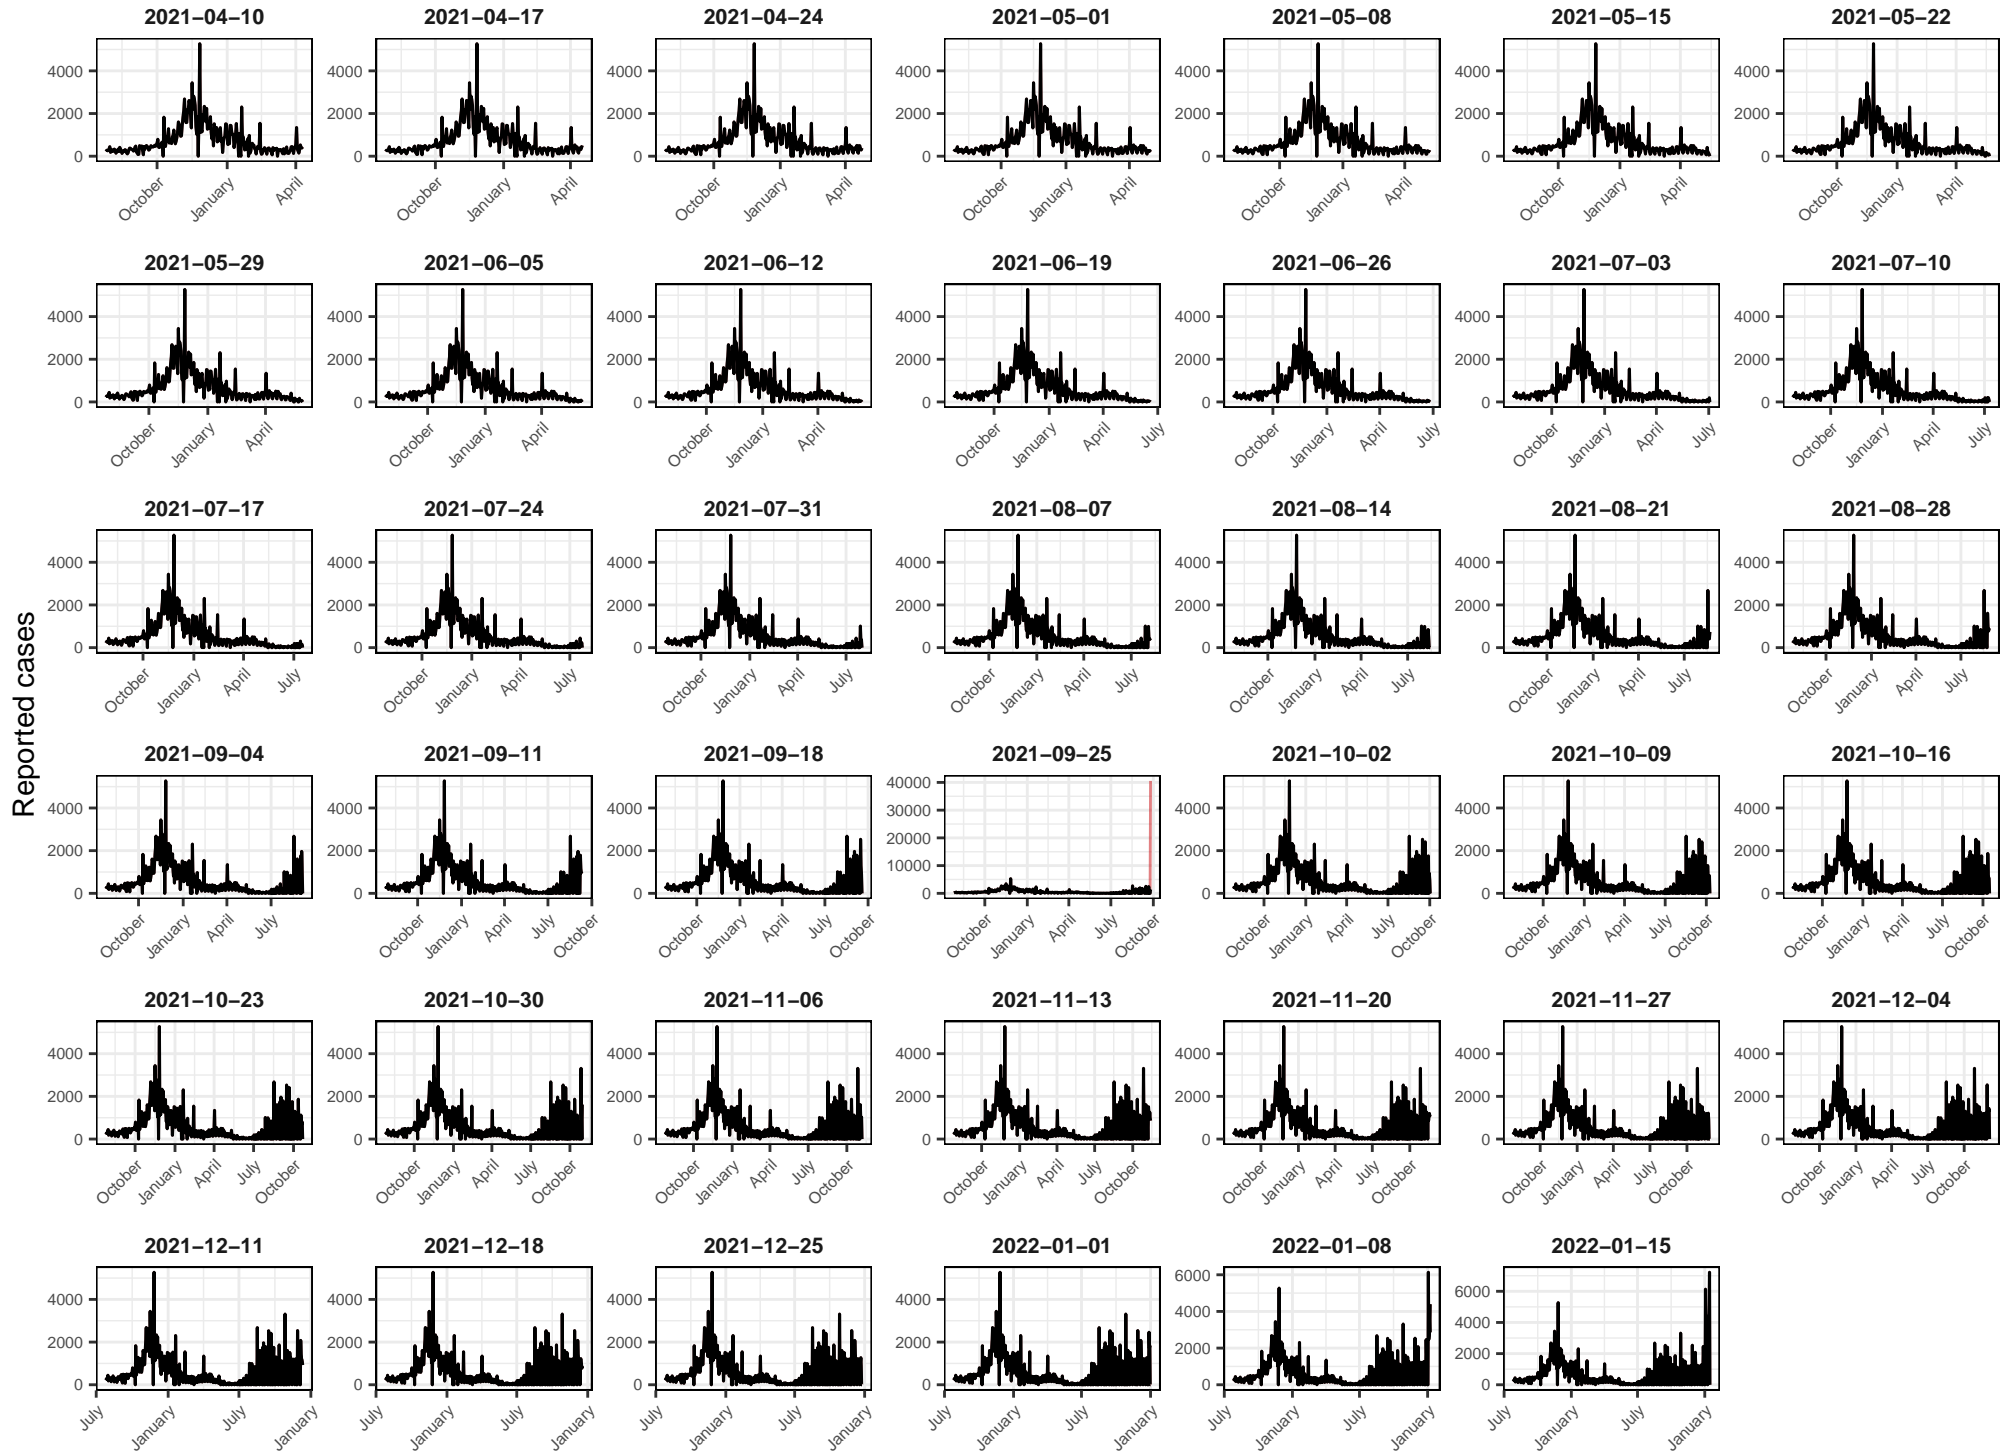



# Nevada

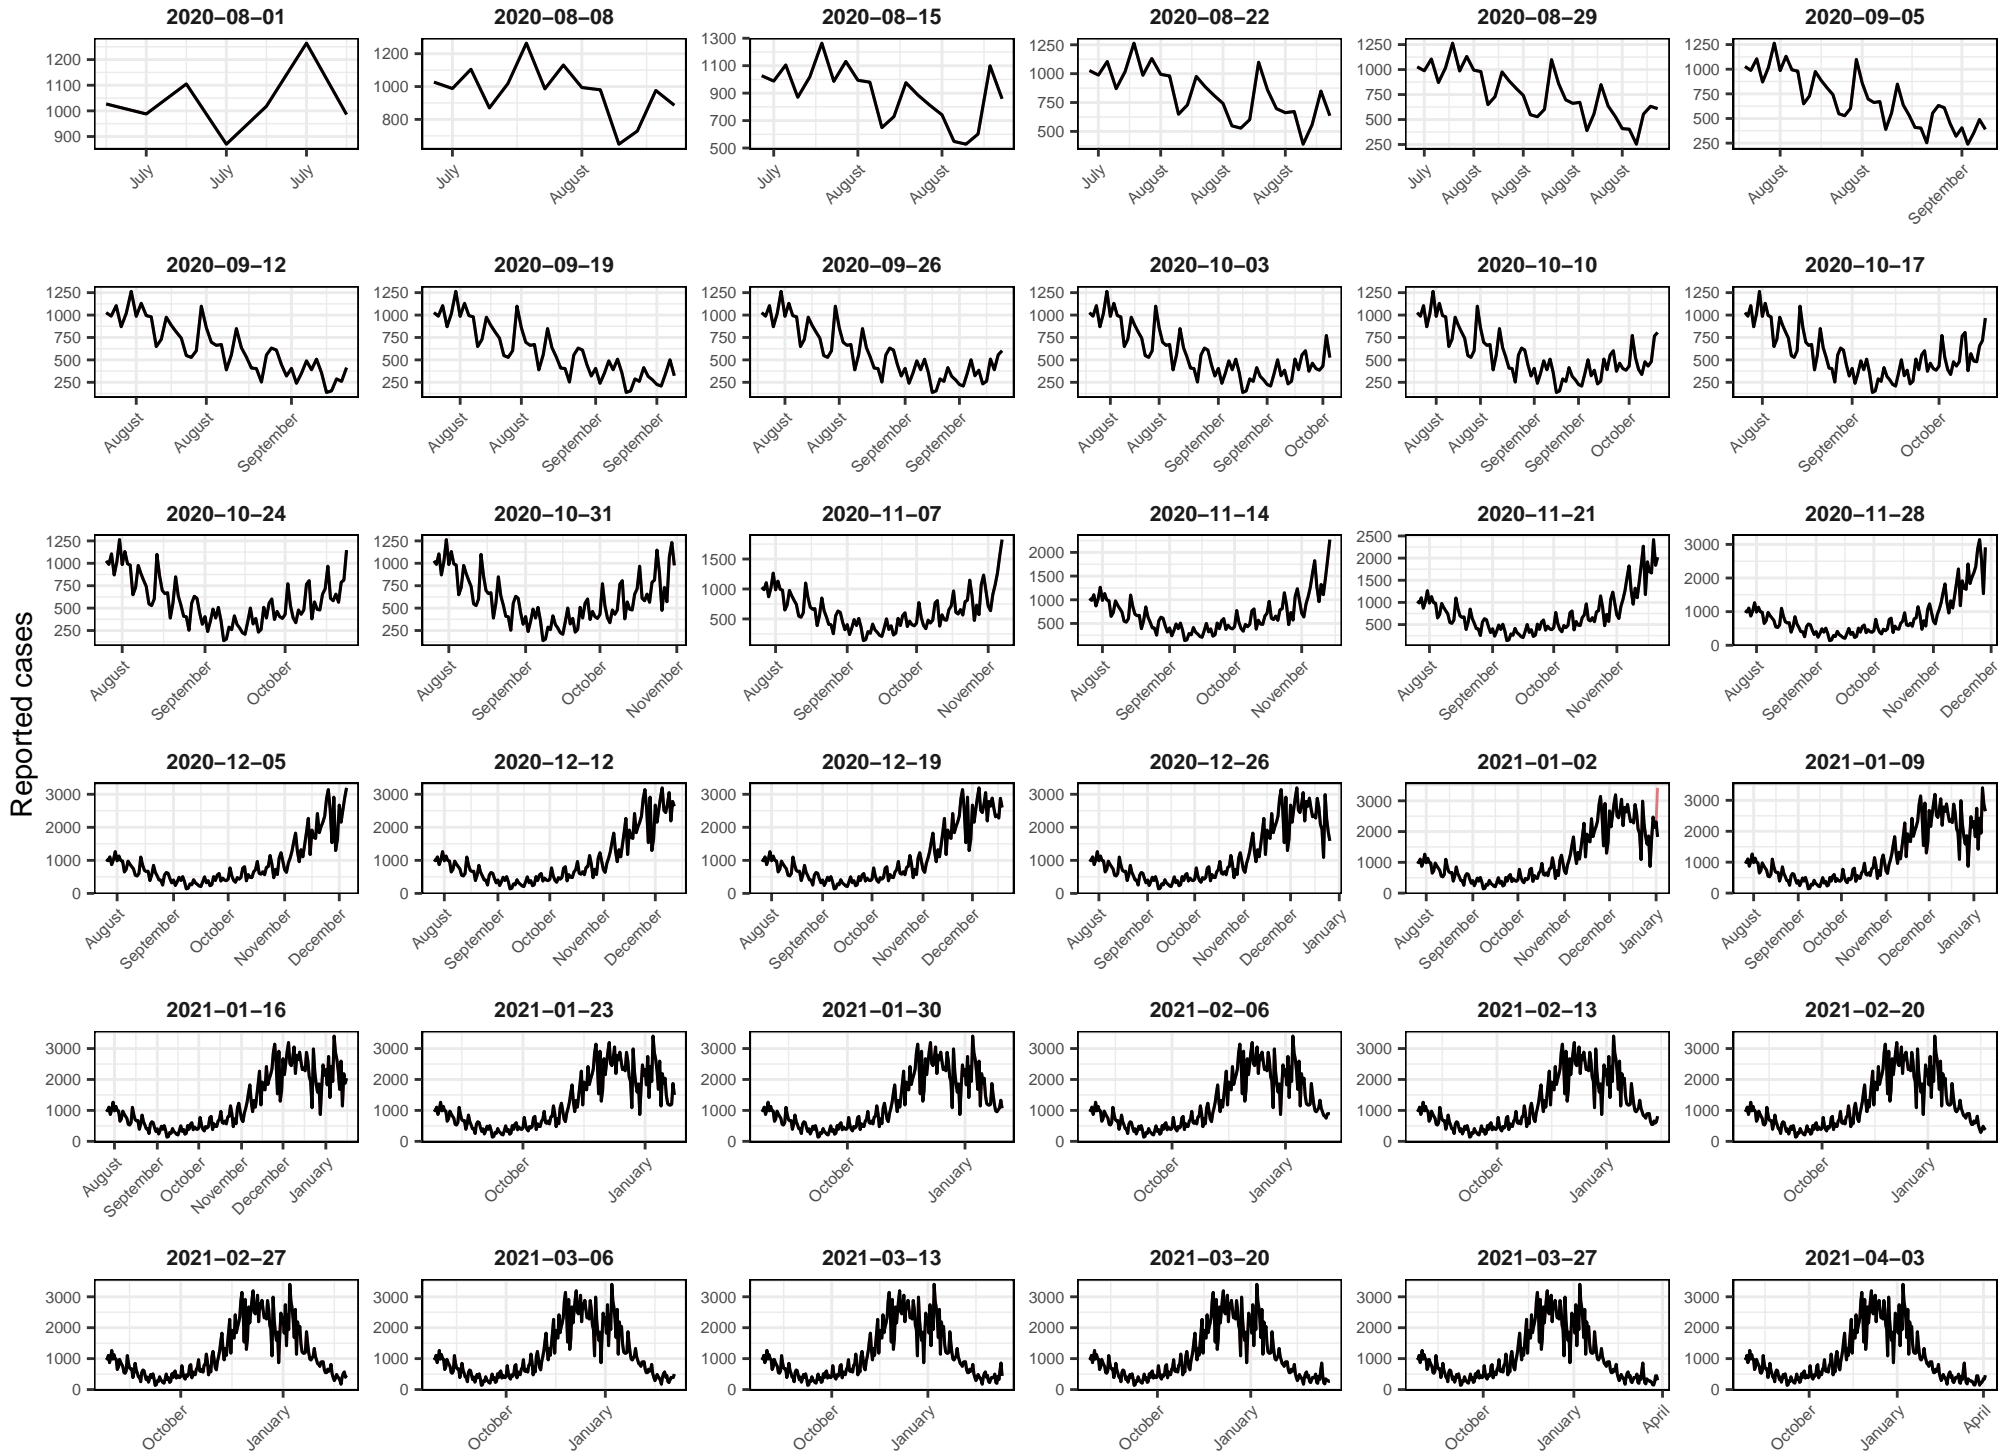

# Nevada

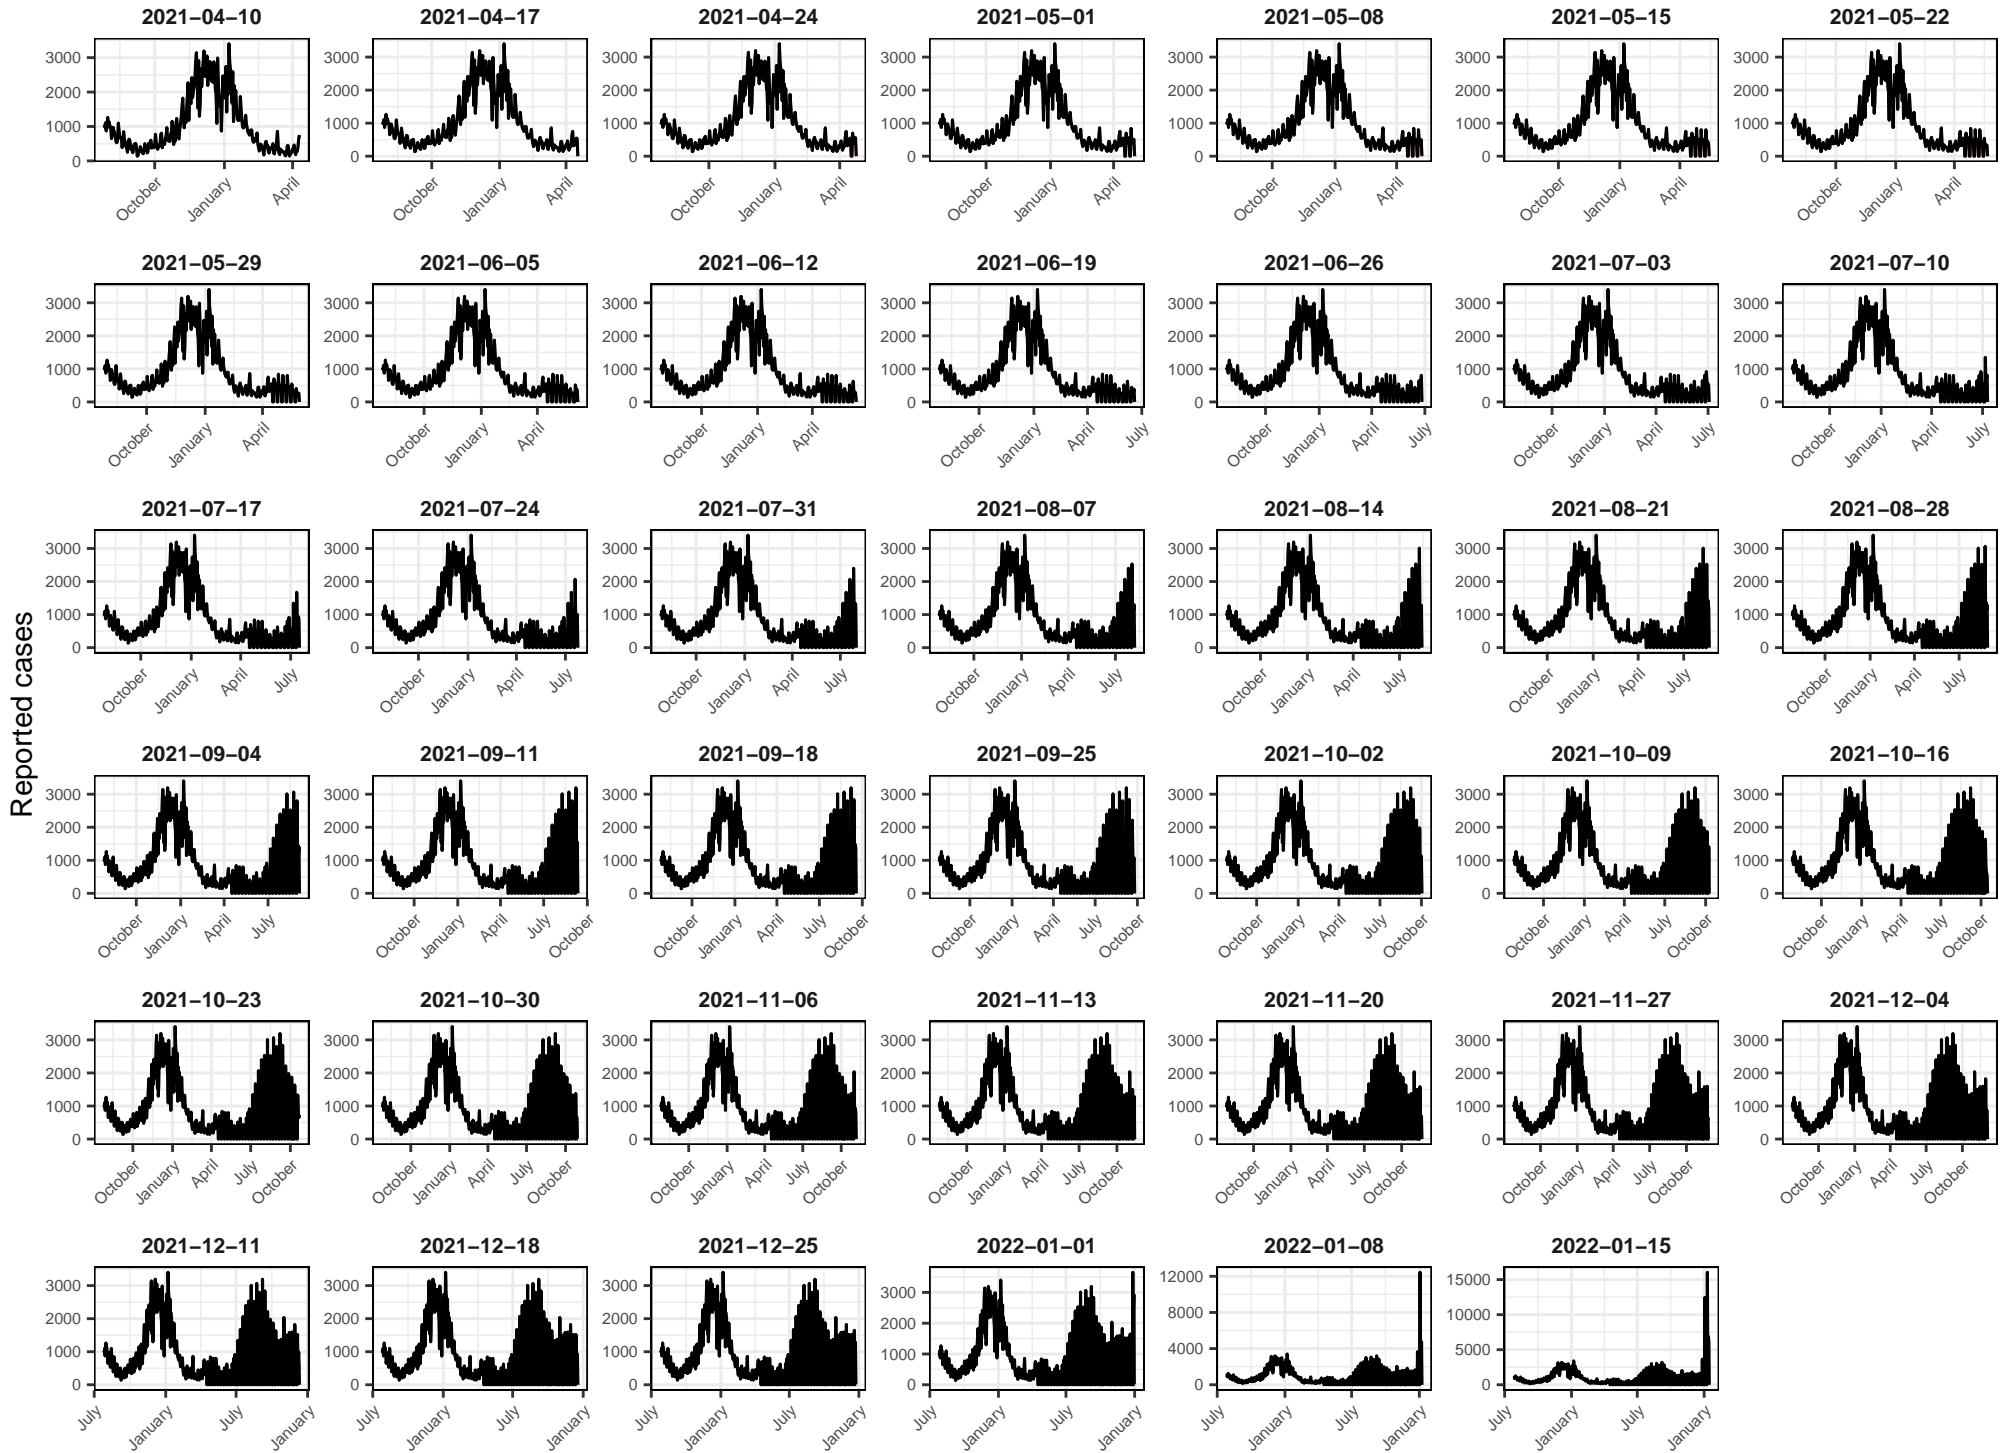

# New Hampshire

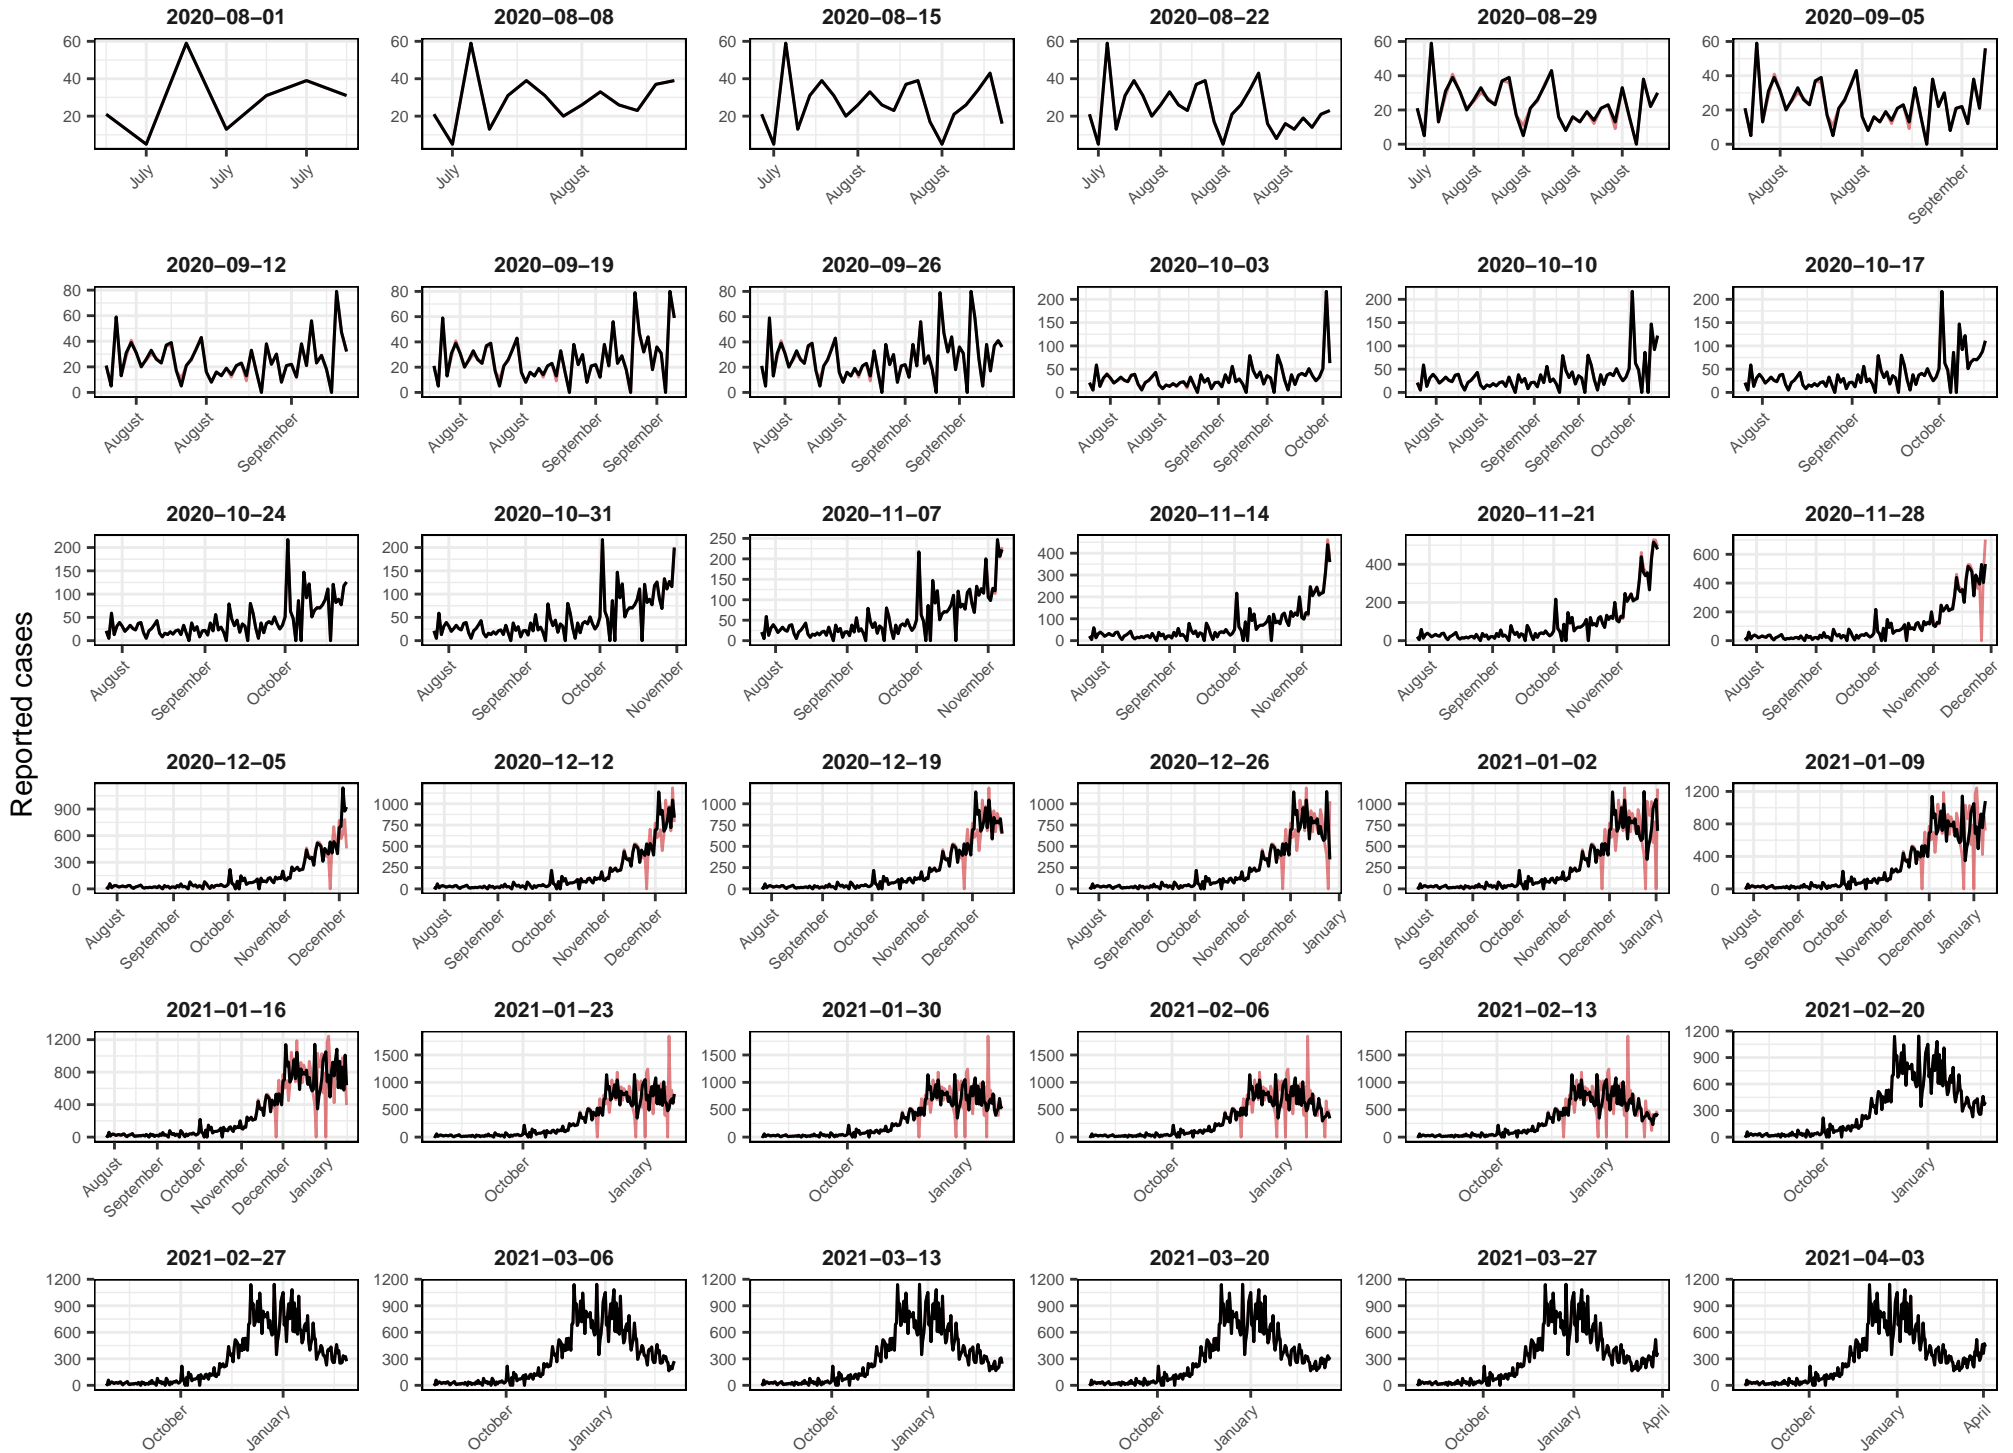

# New Hampshire

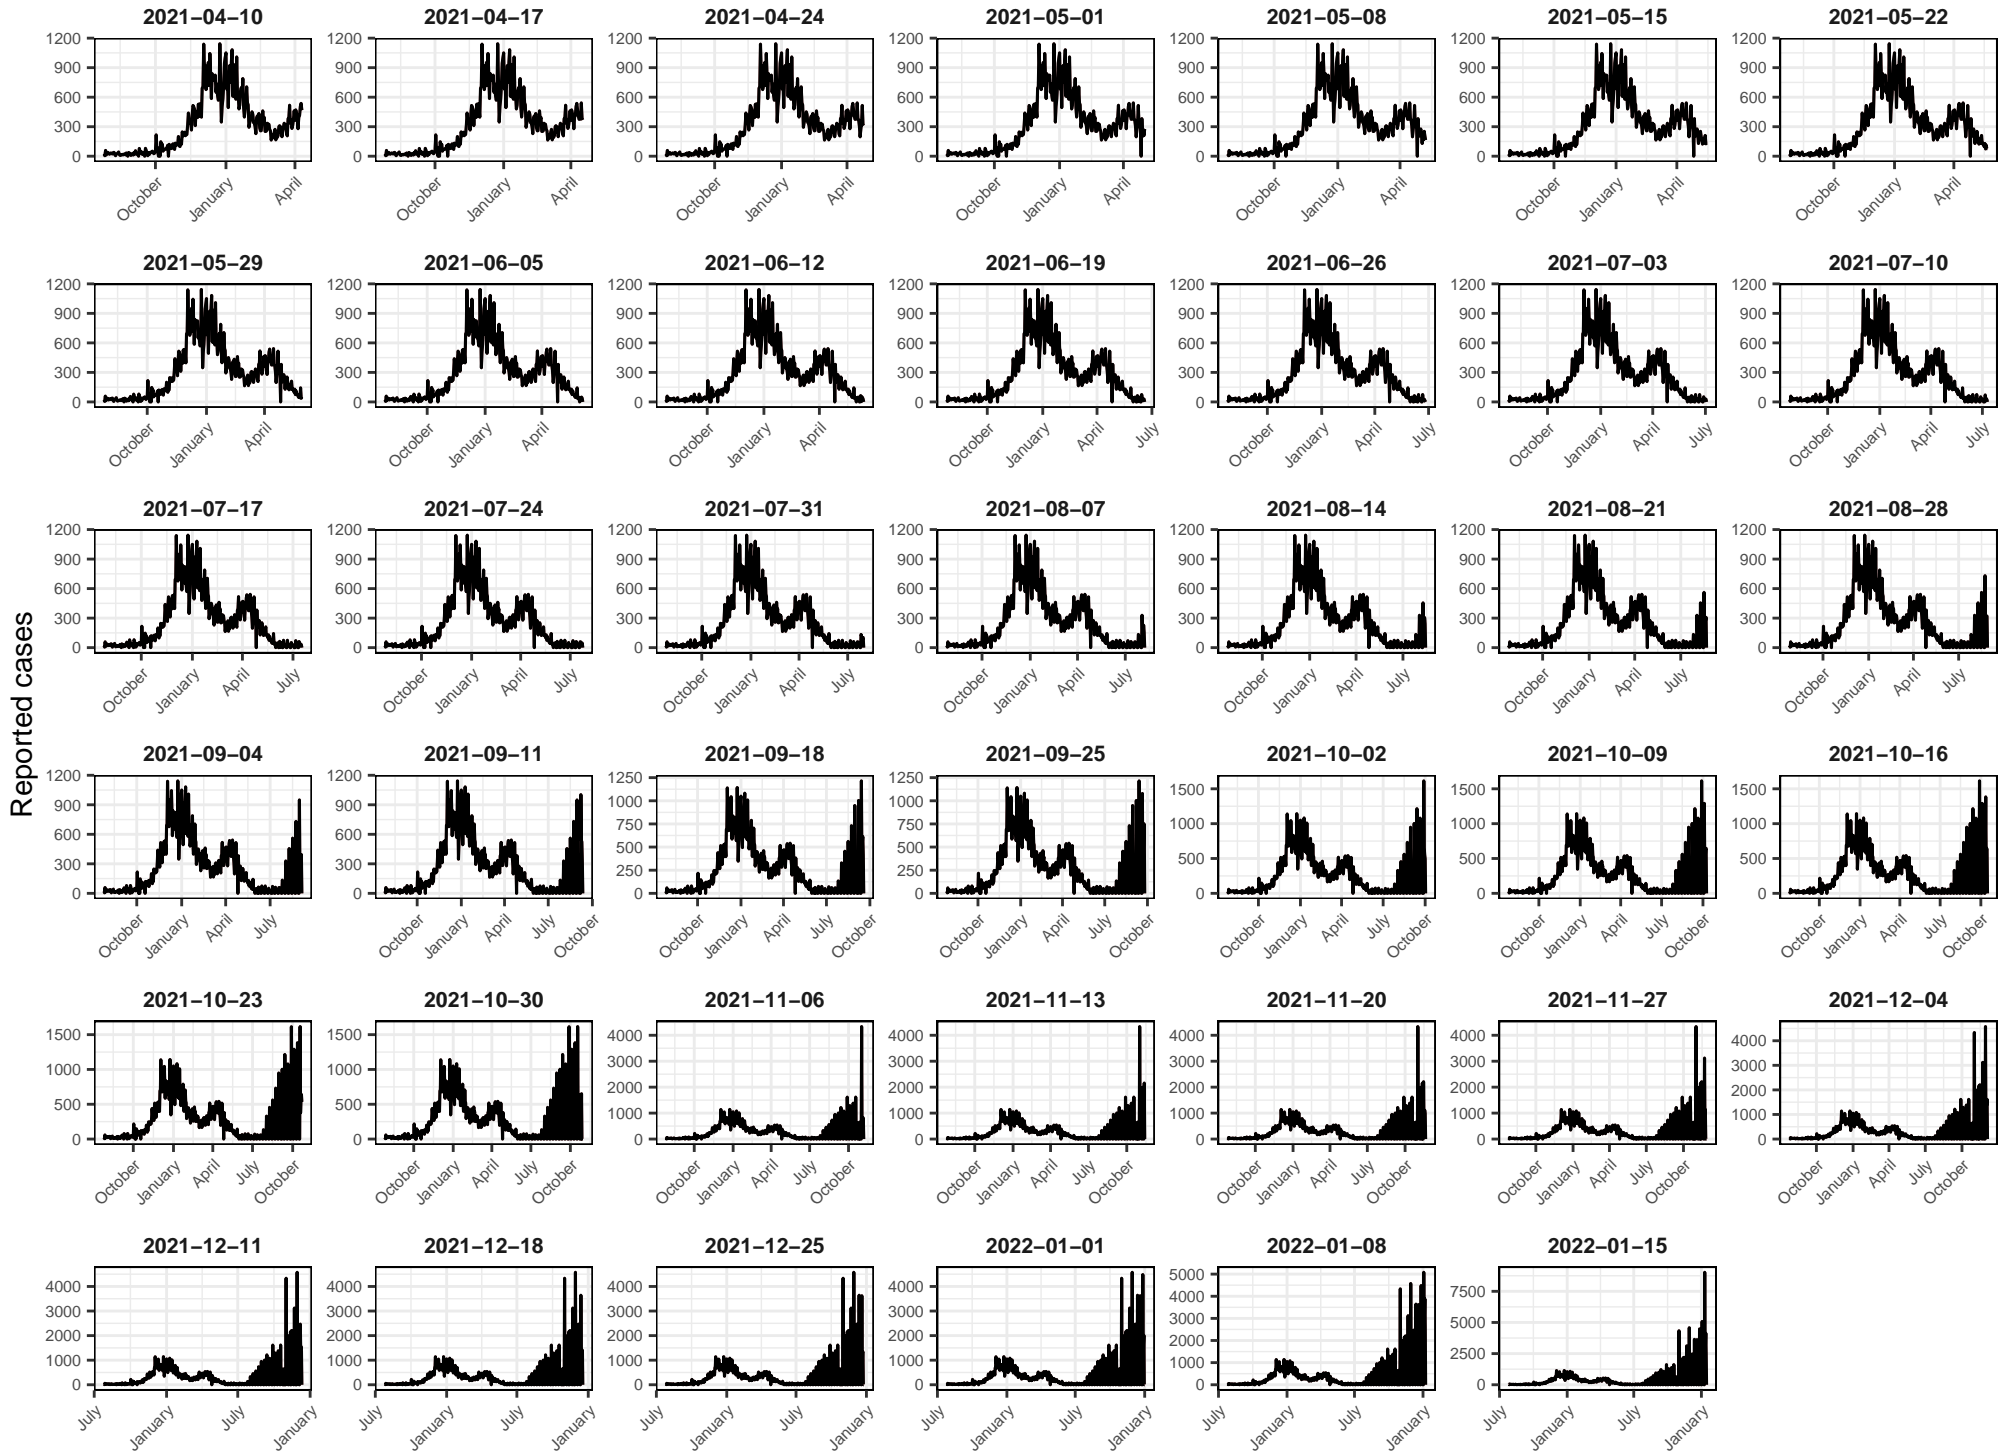

# New Jersey

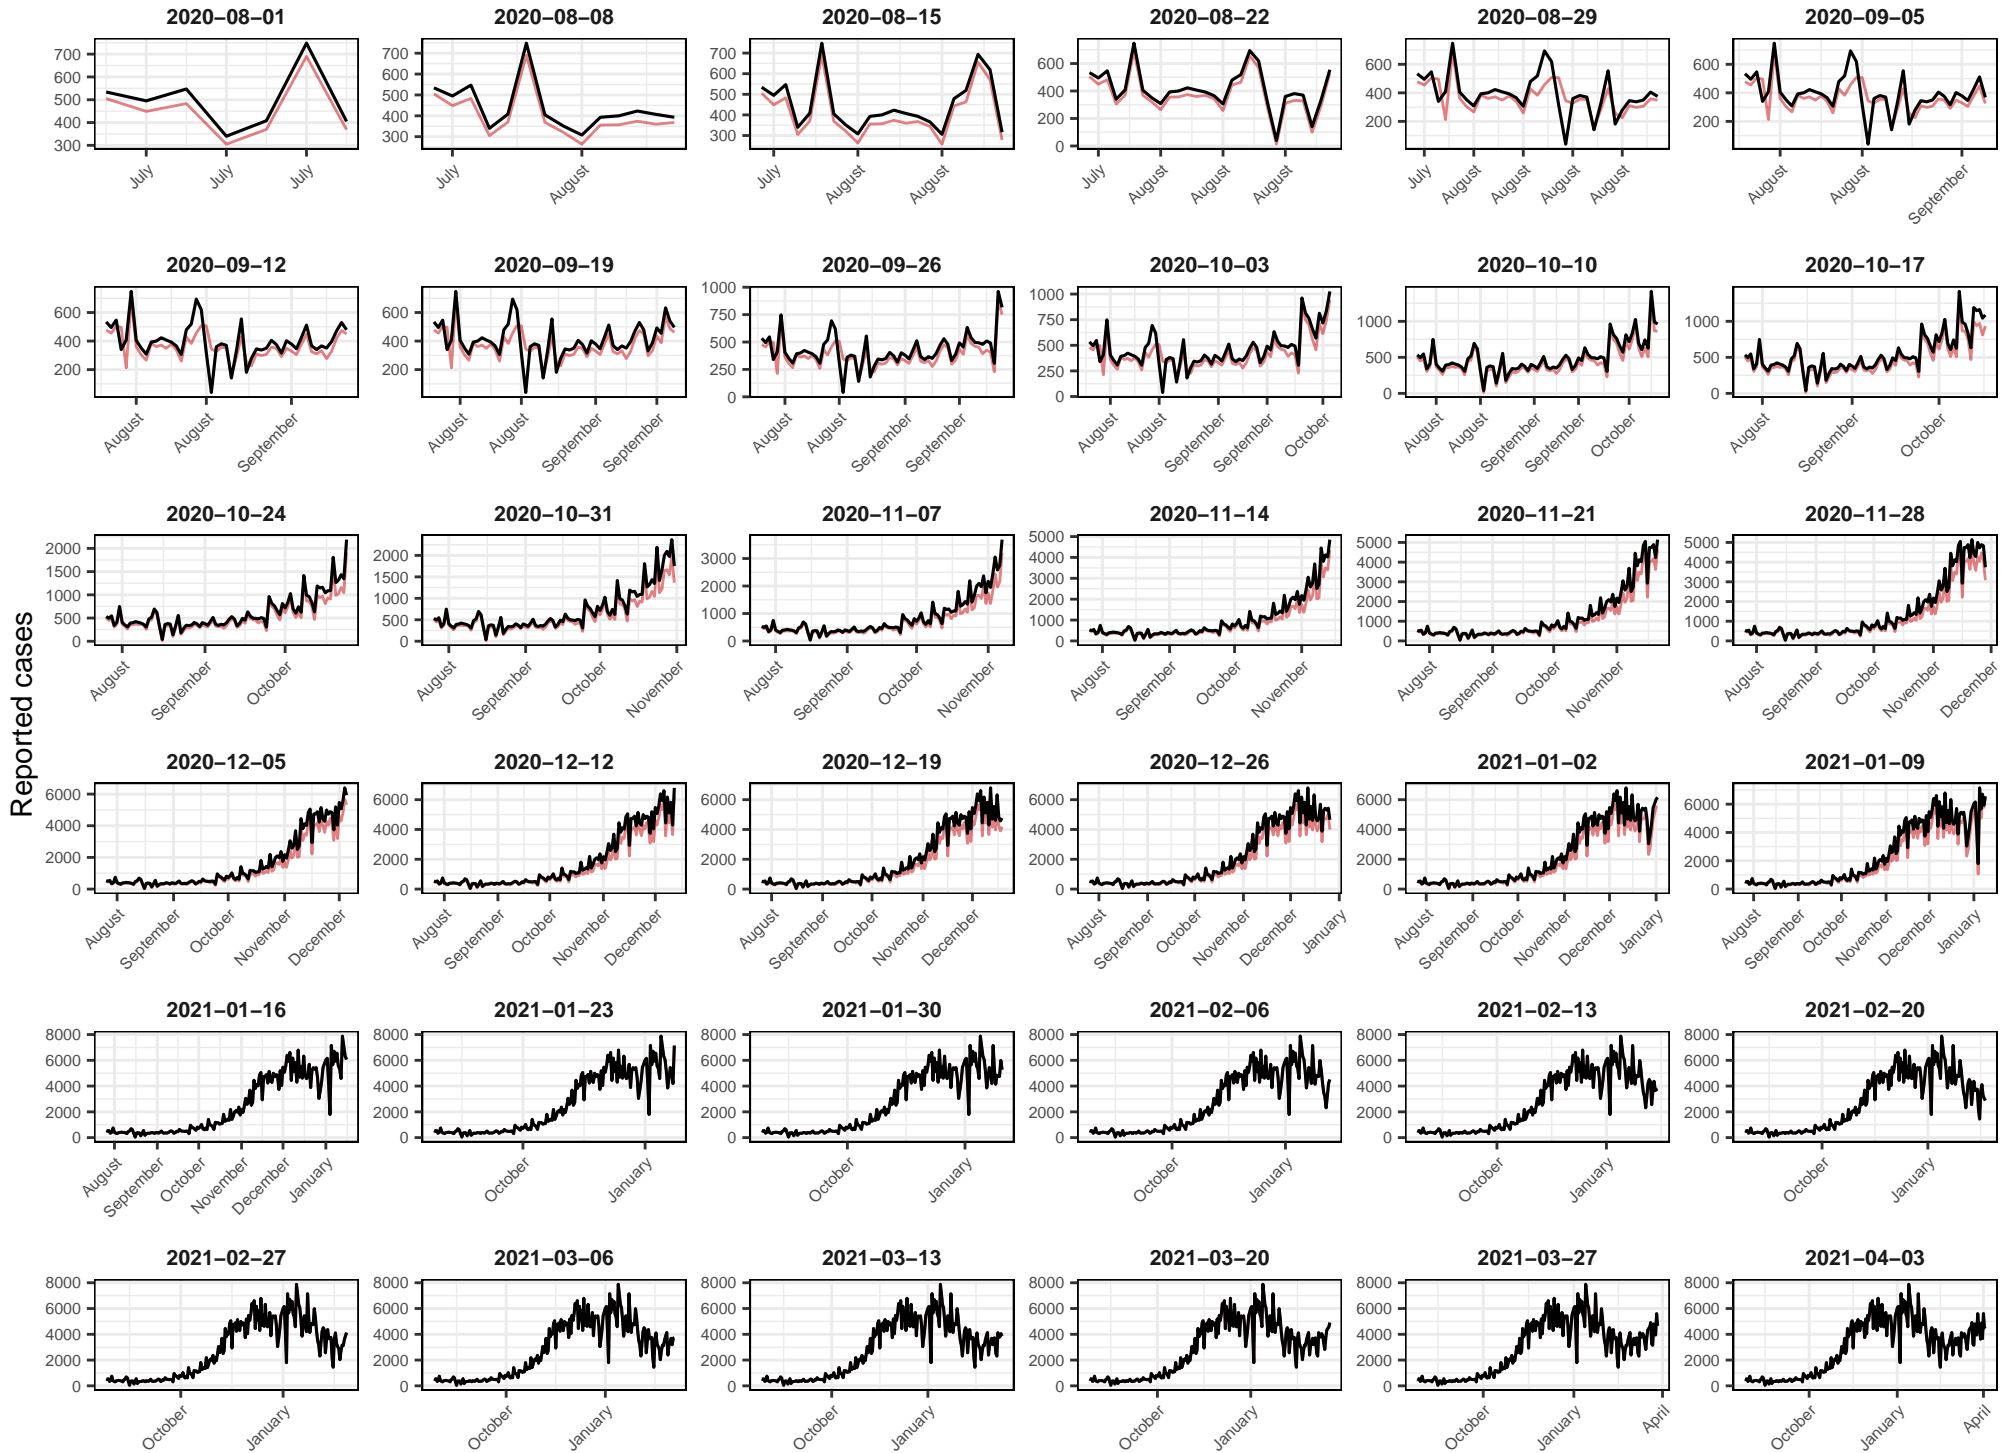

# New Jersey

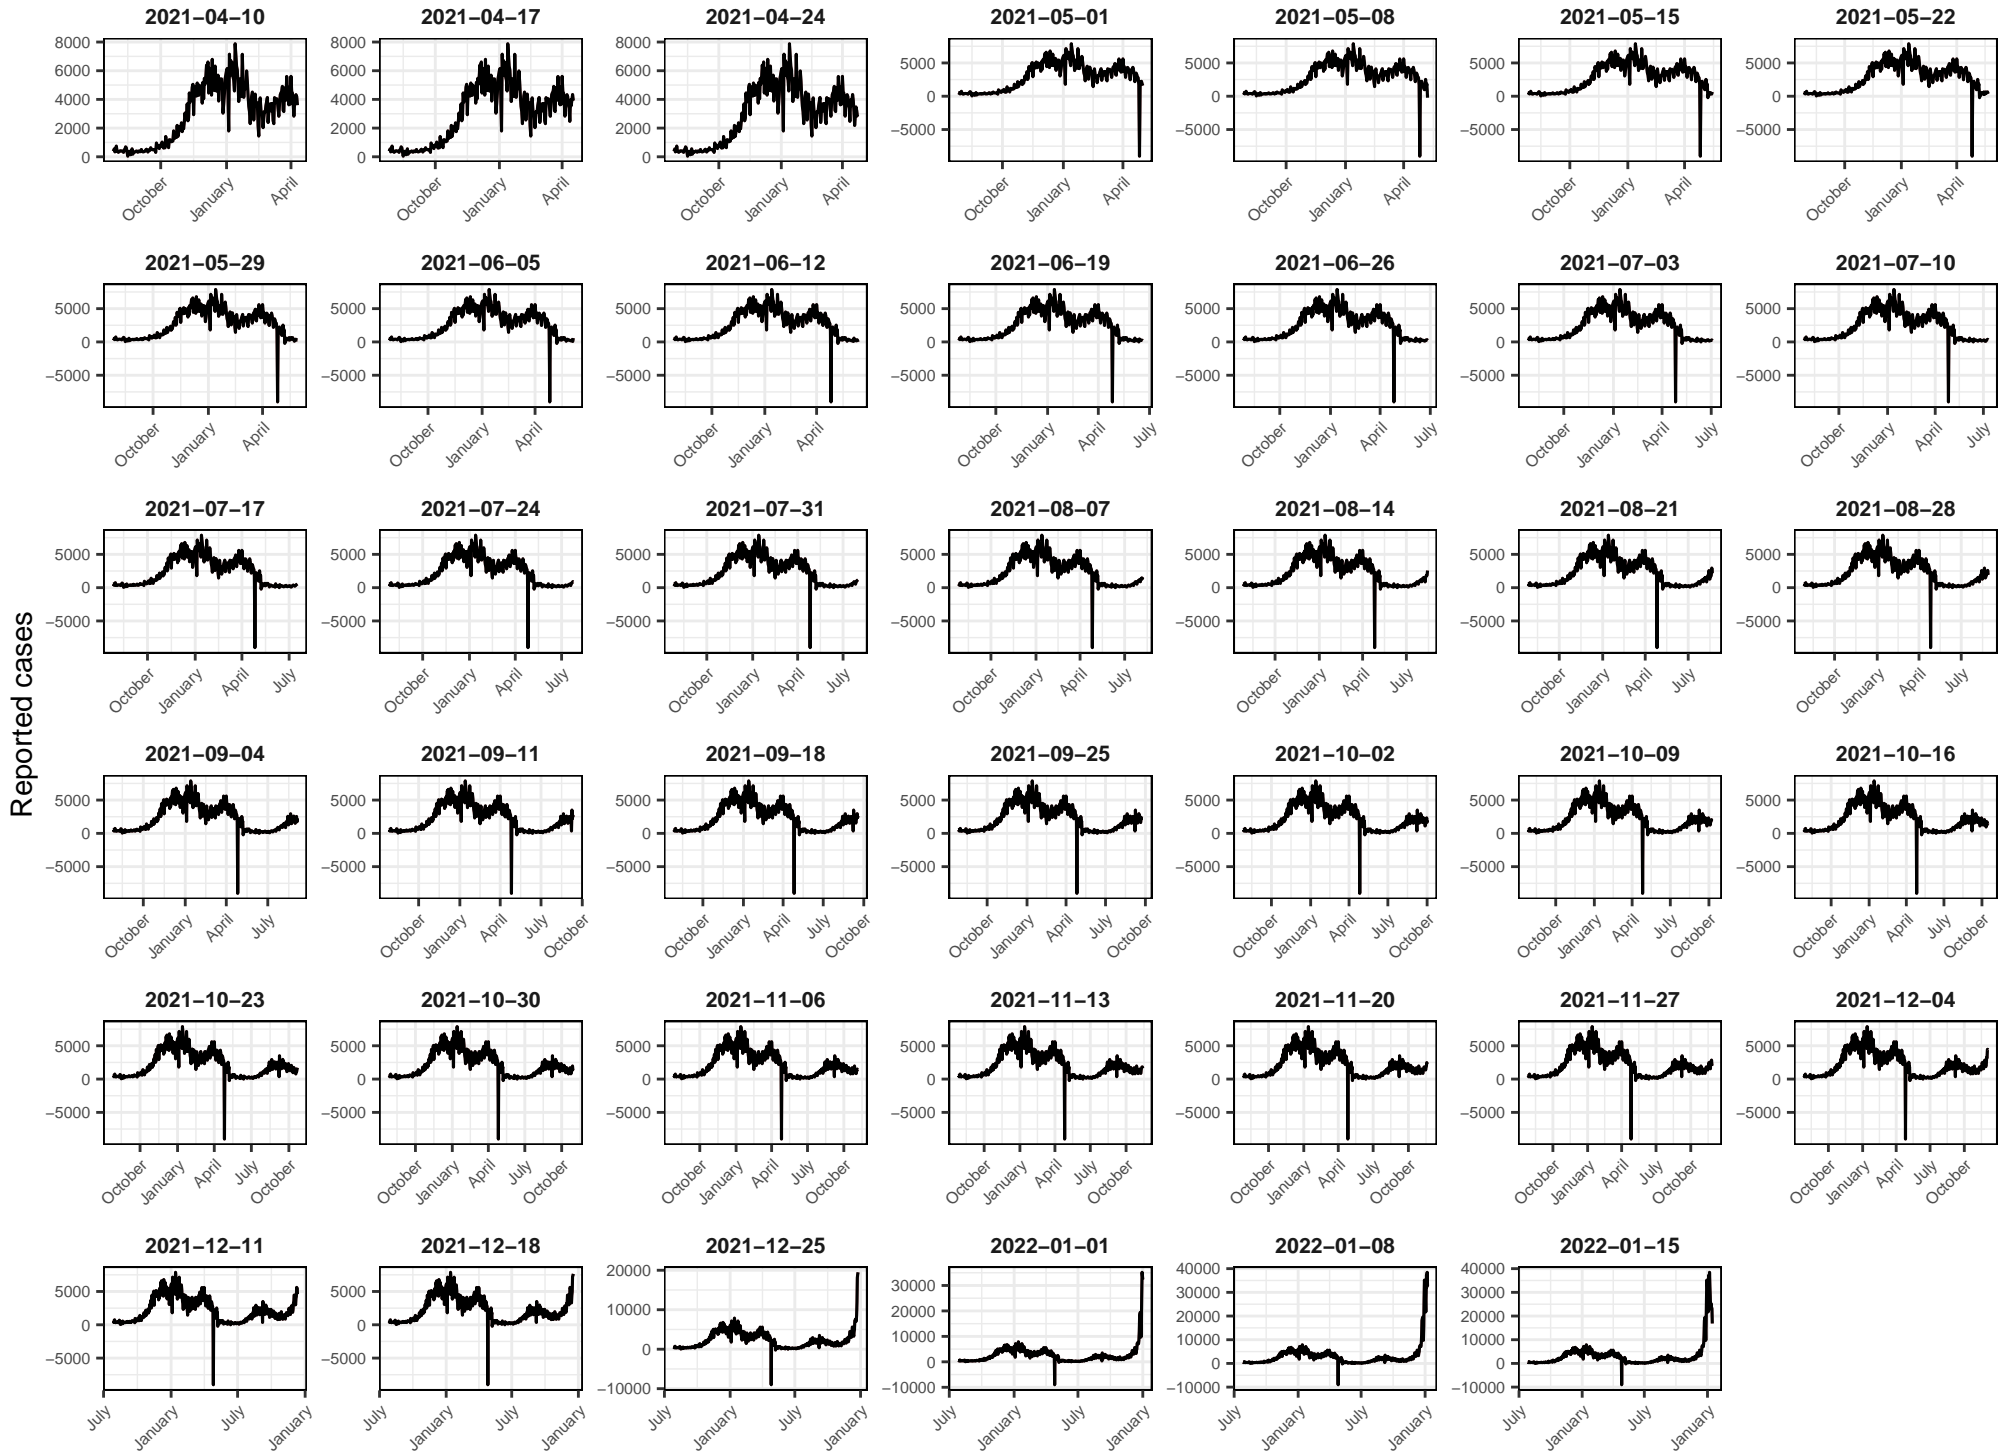

# New Mexico

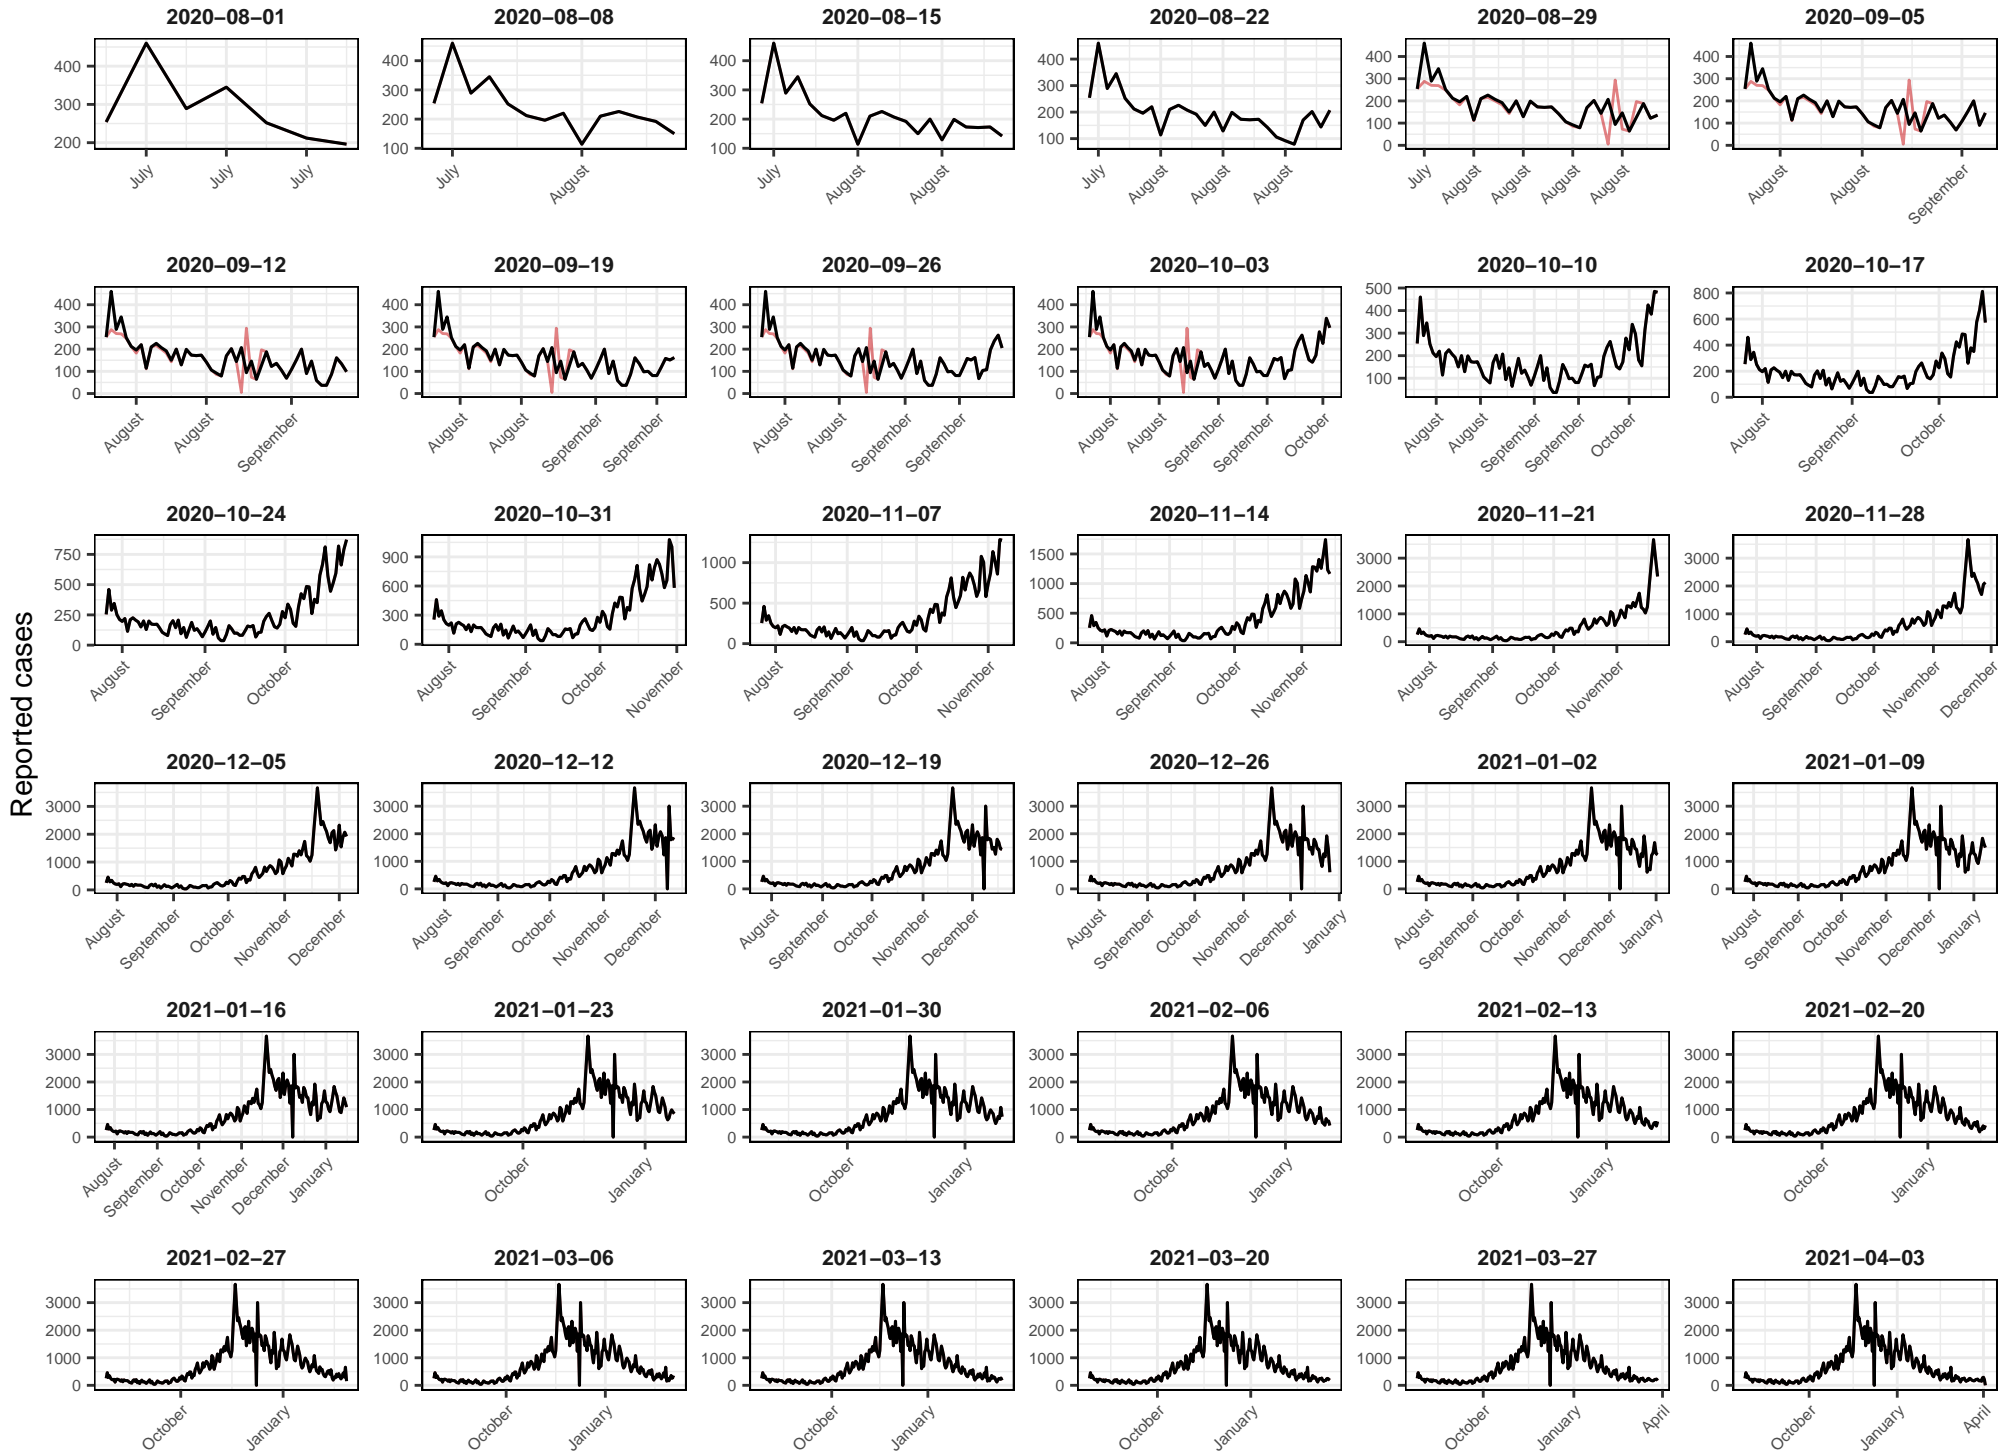

# New Mexico

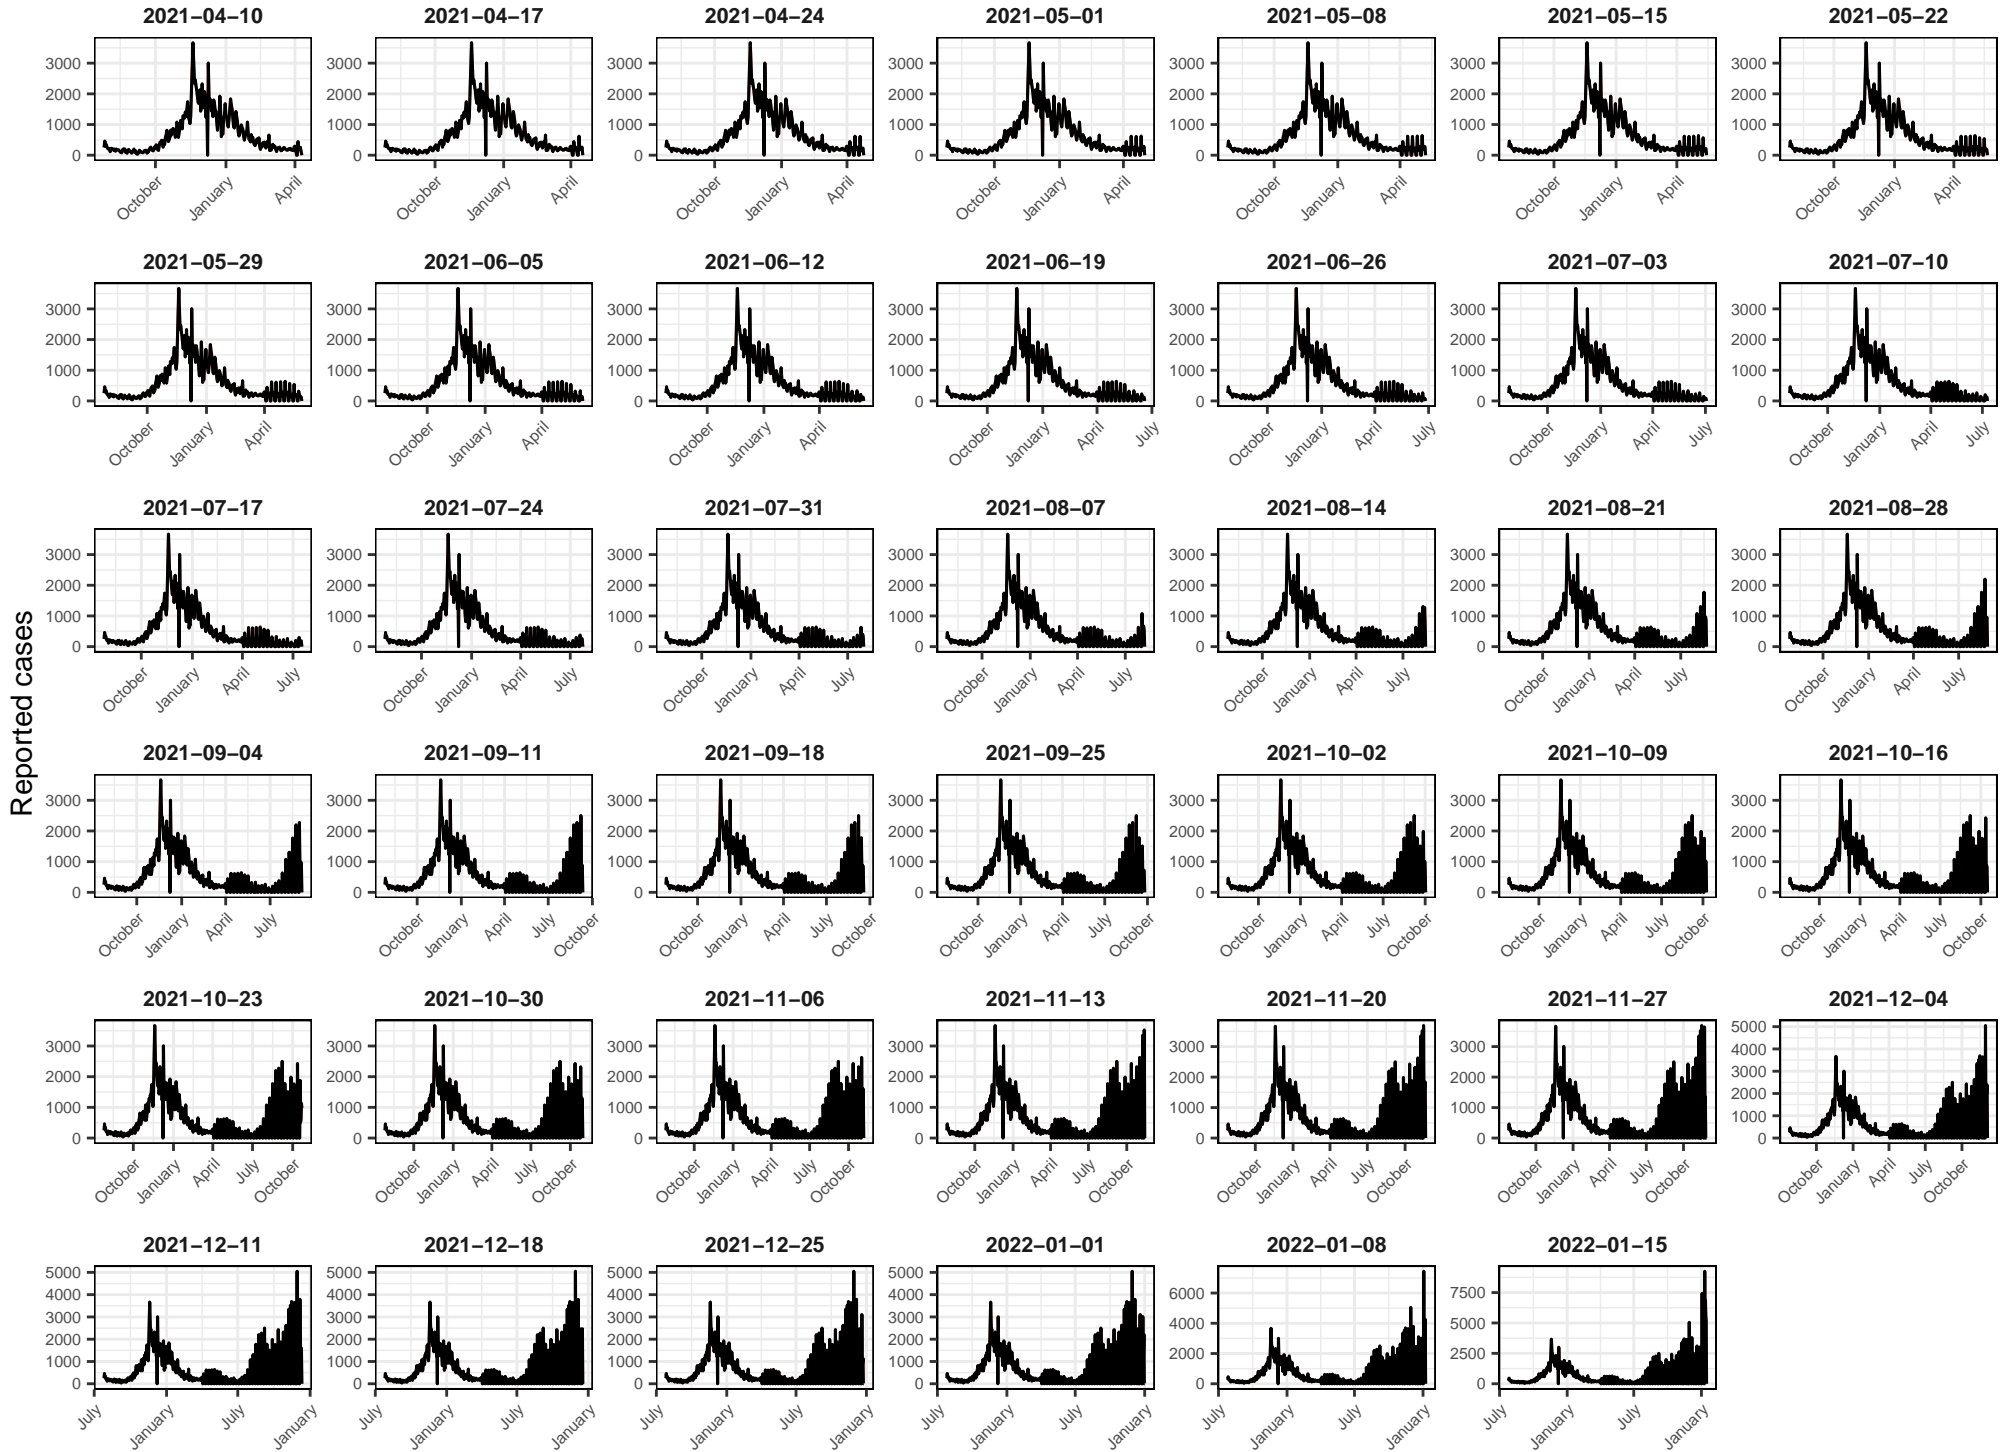



# New York

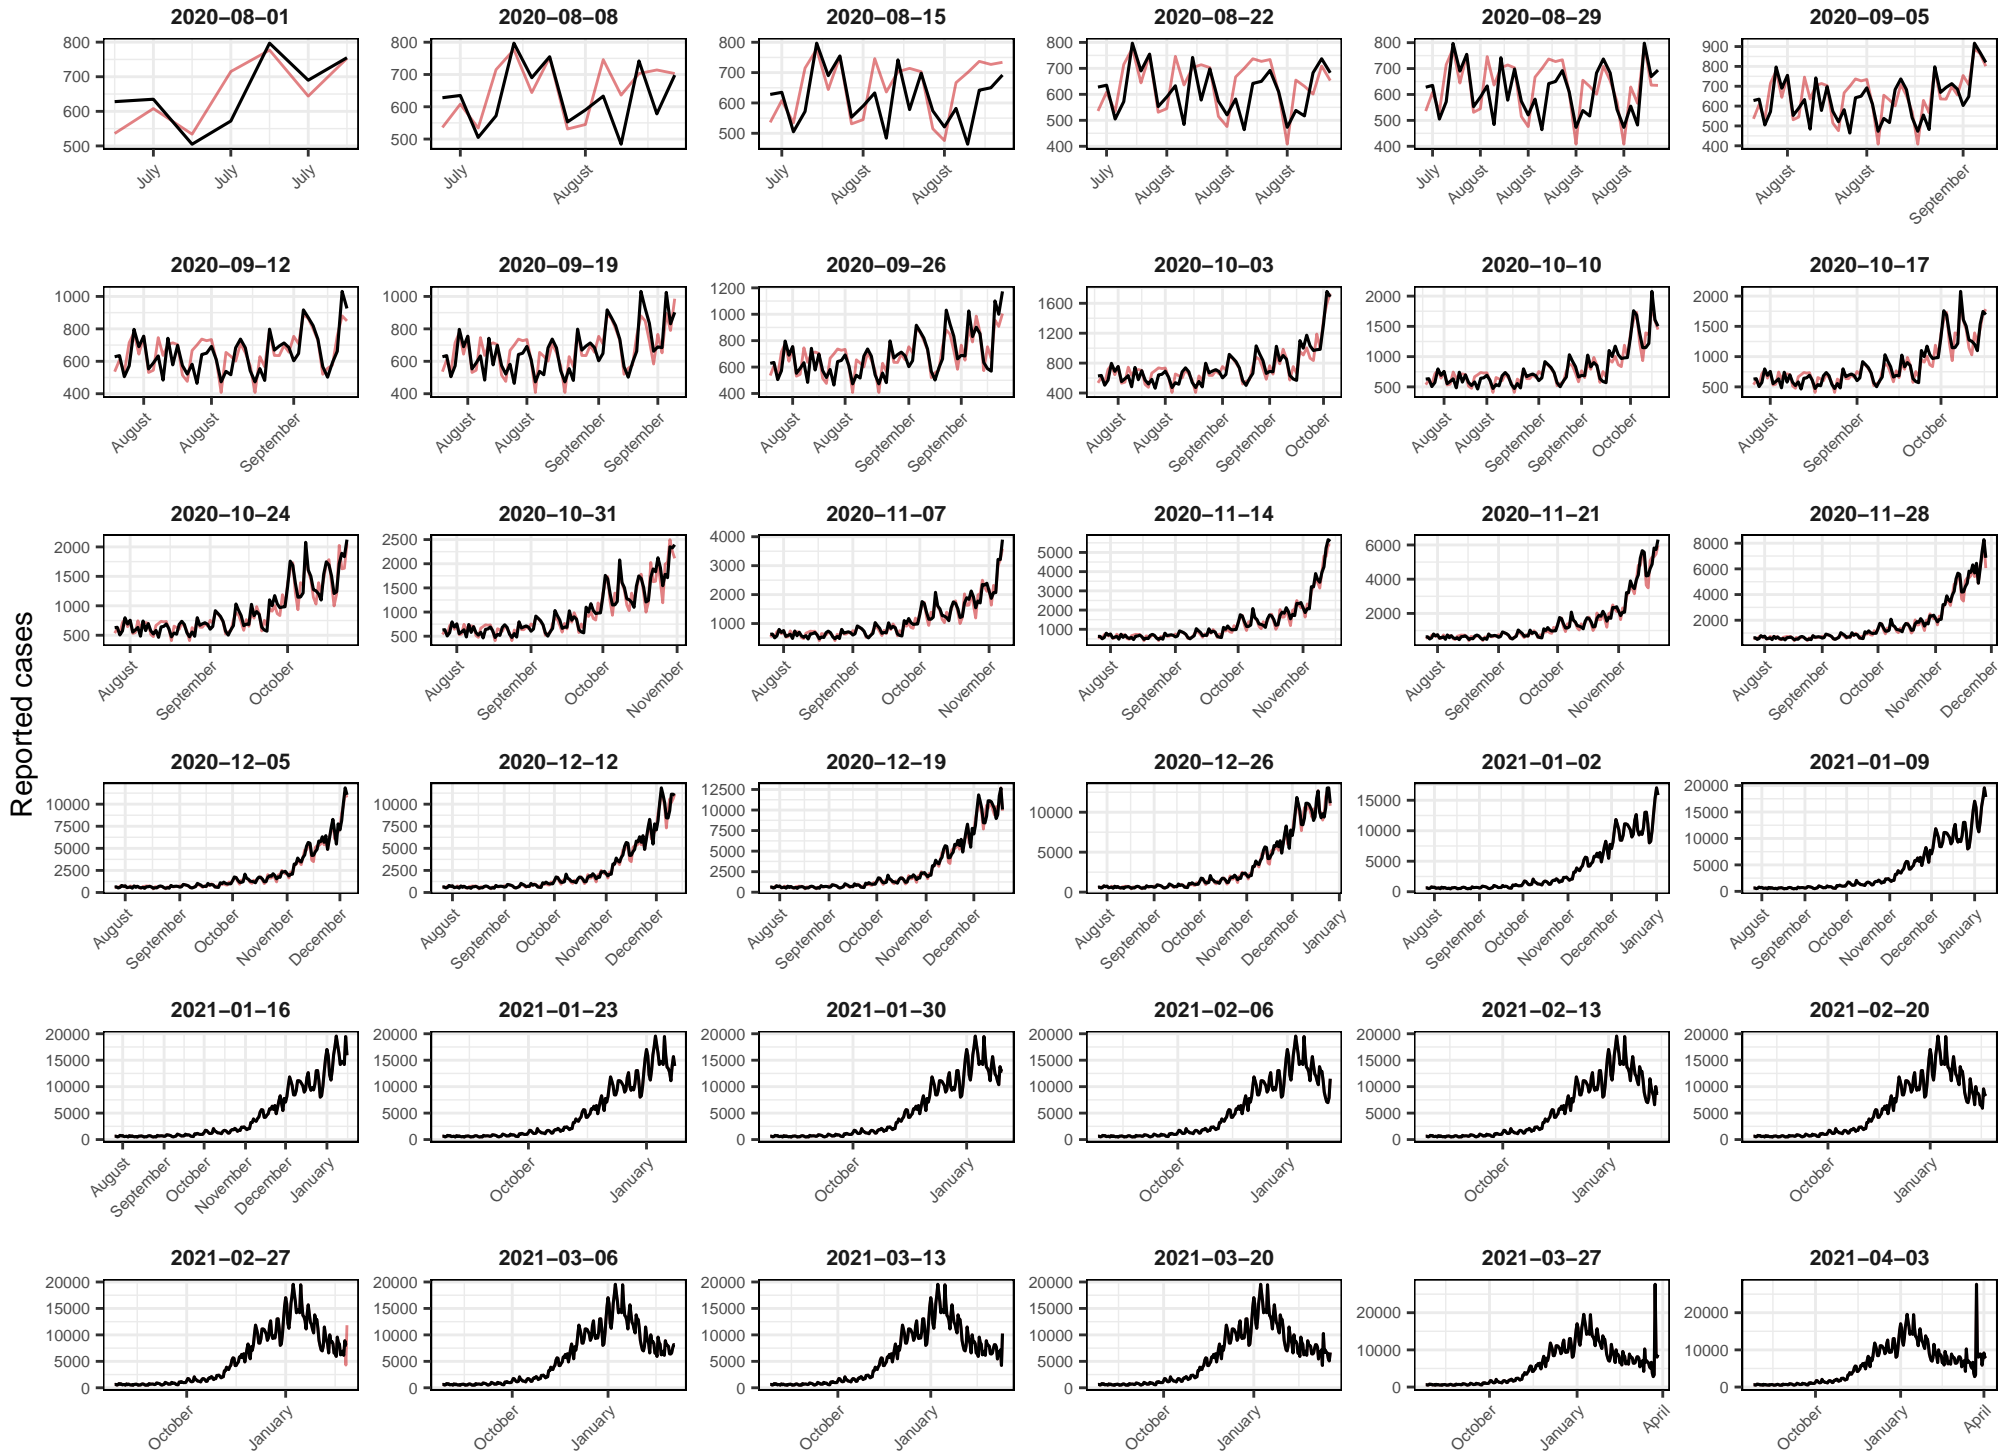

# New York

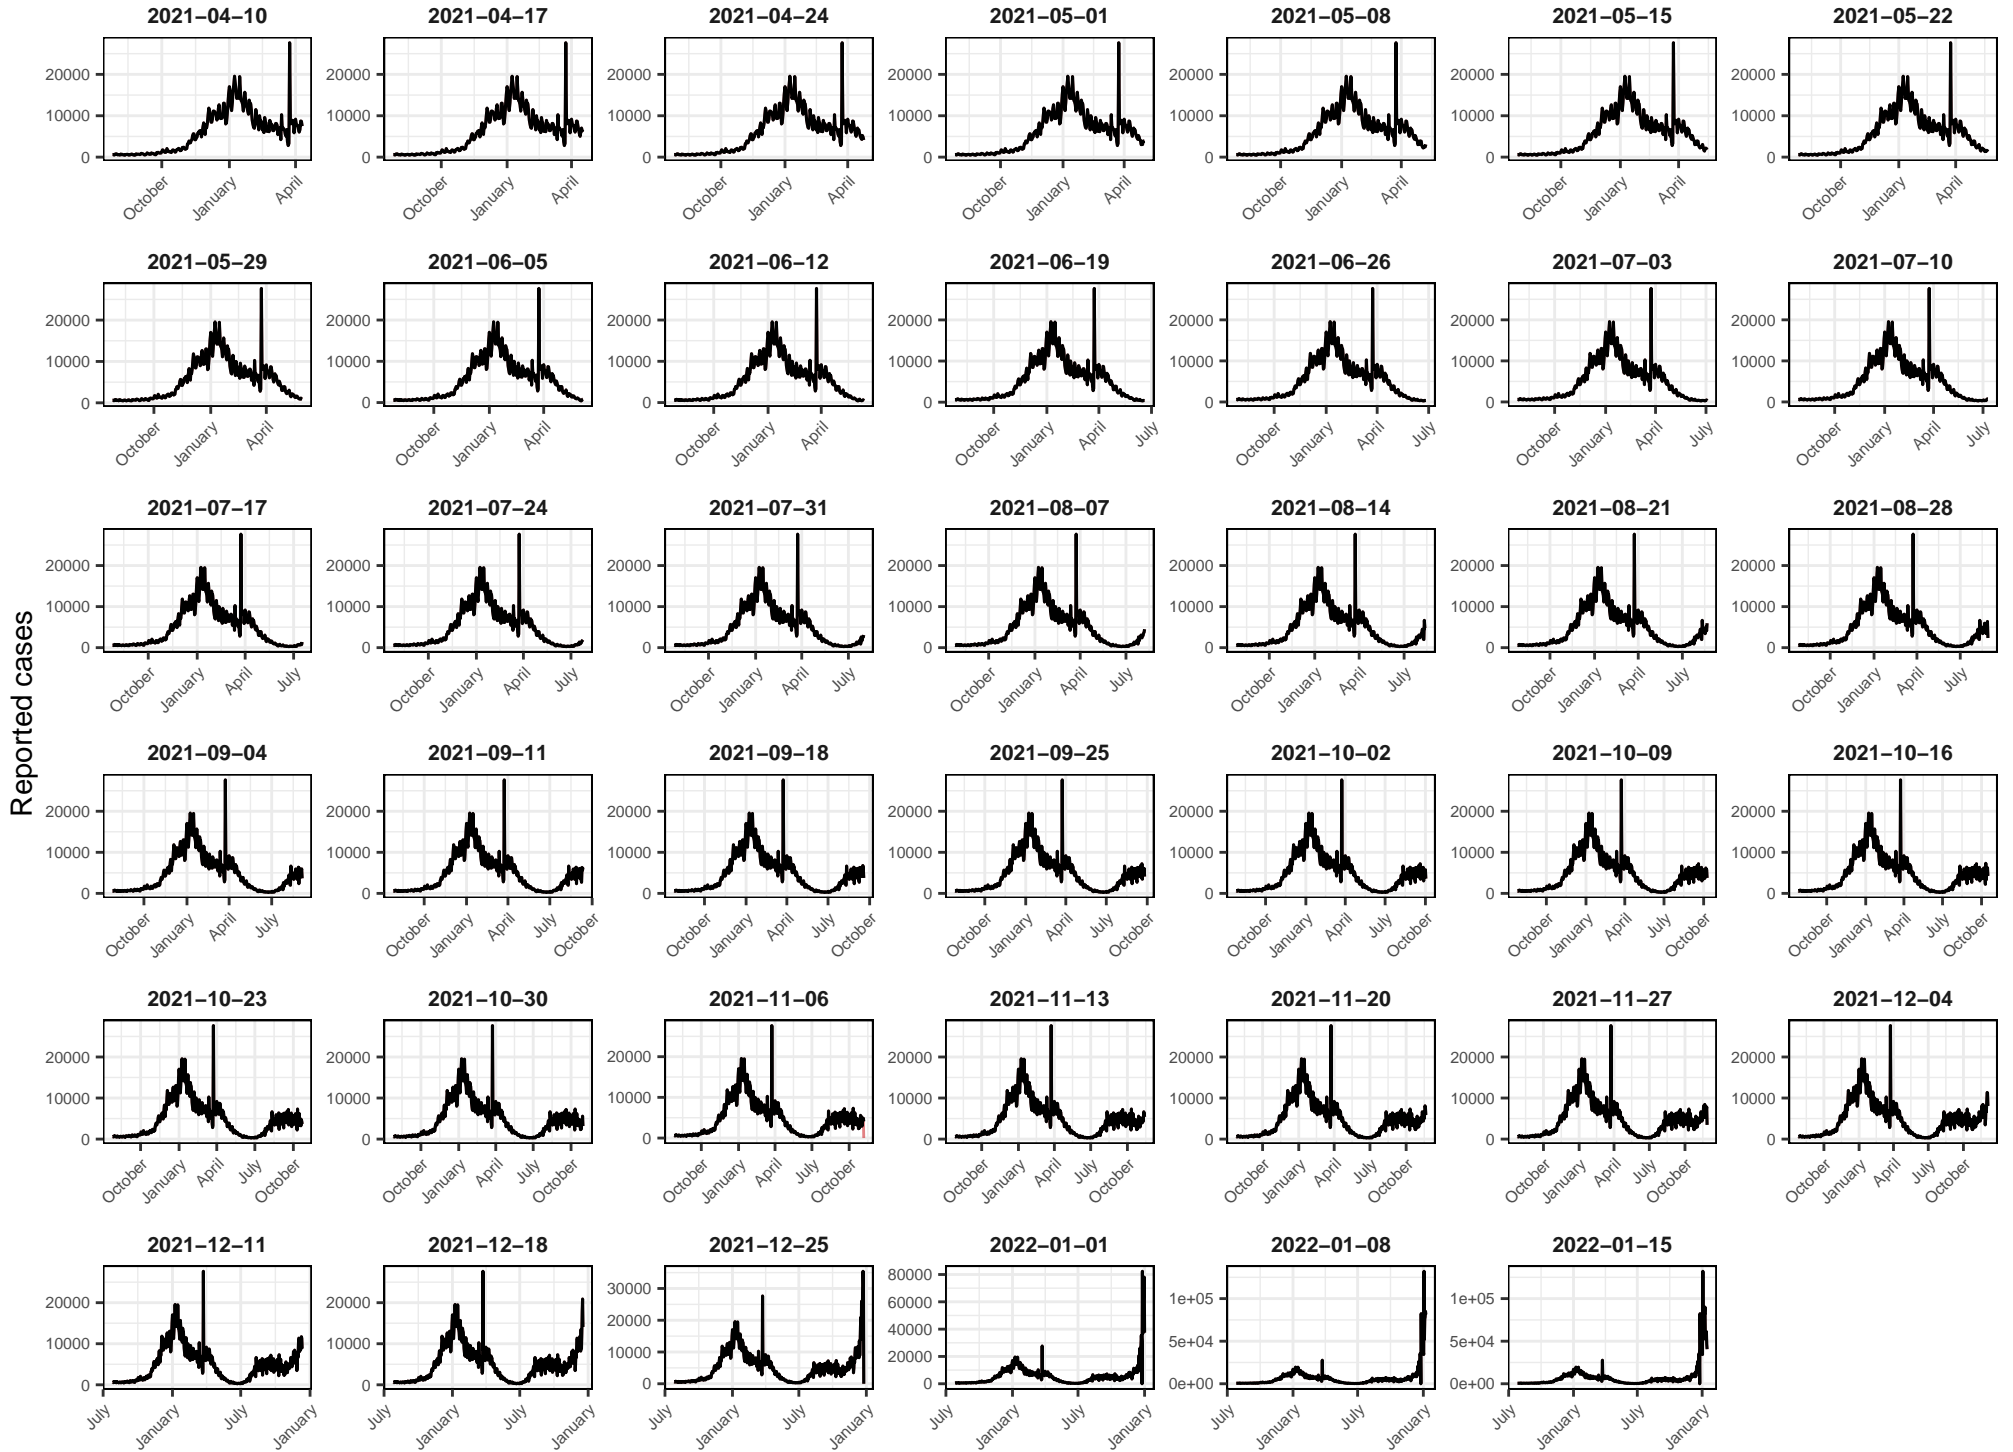

# North Carolina

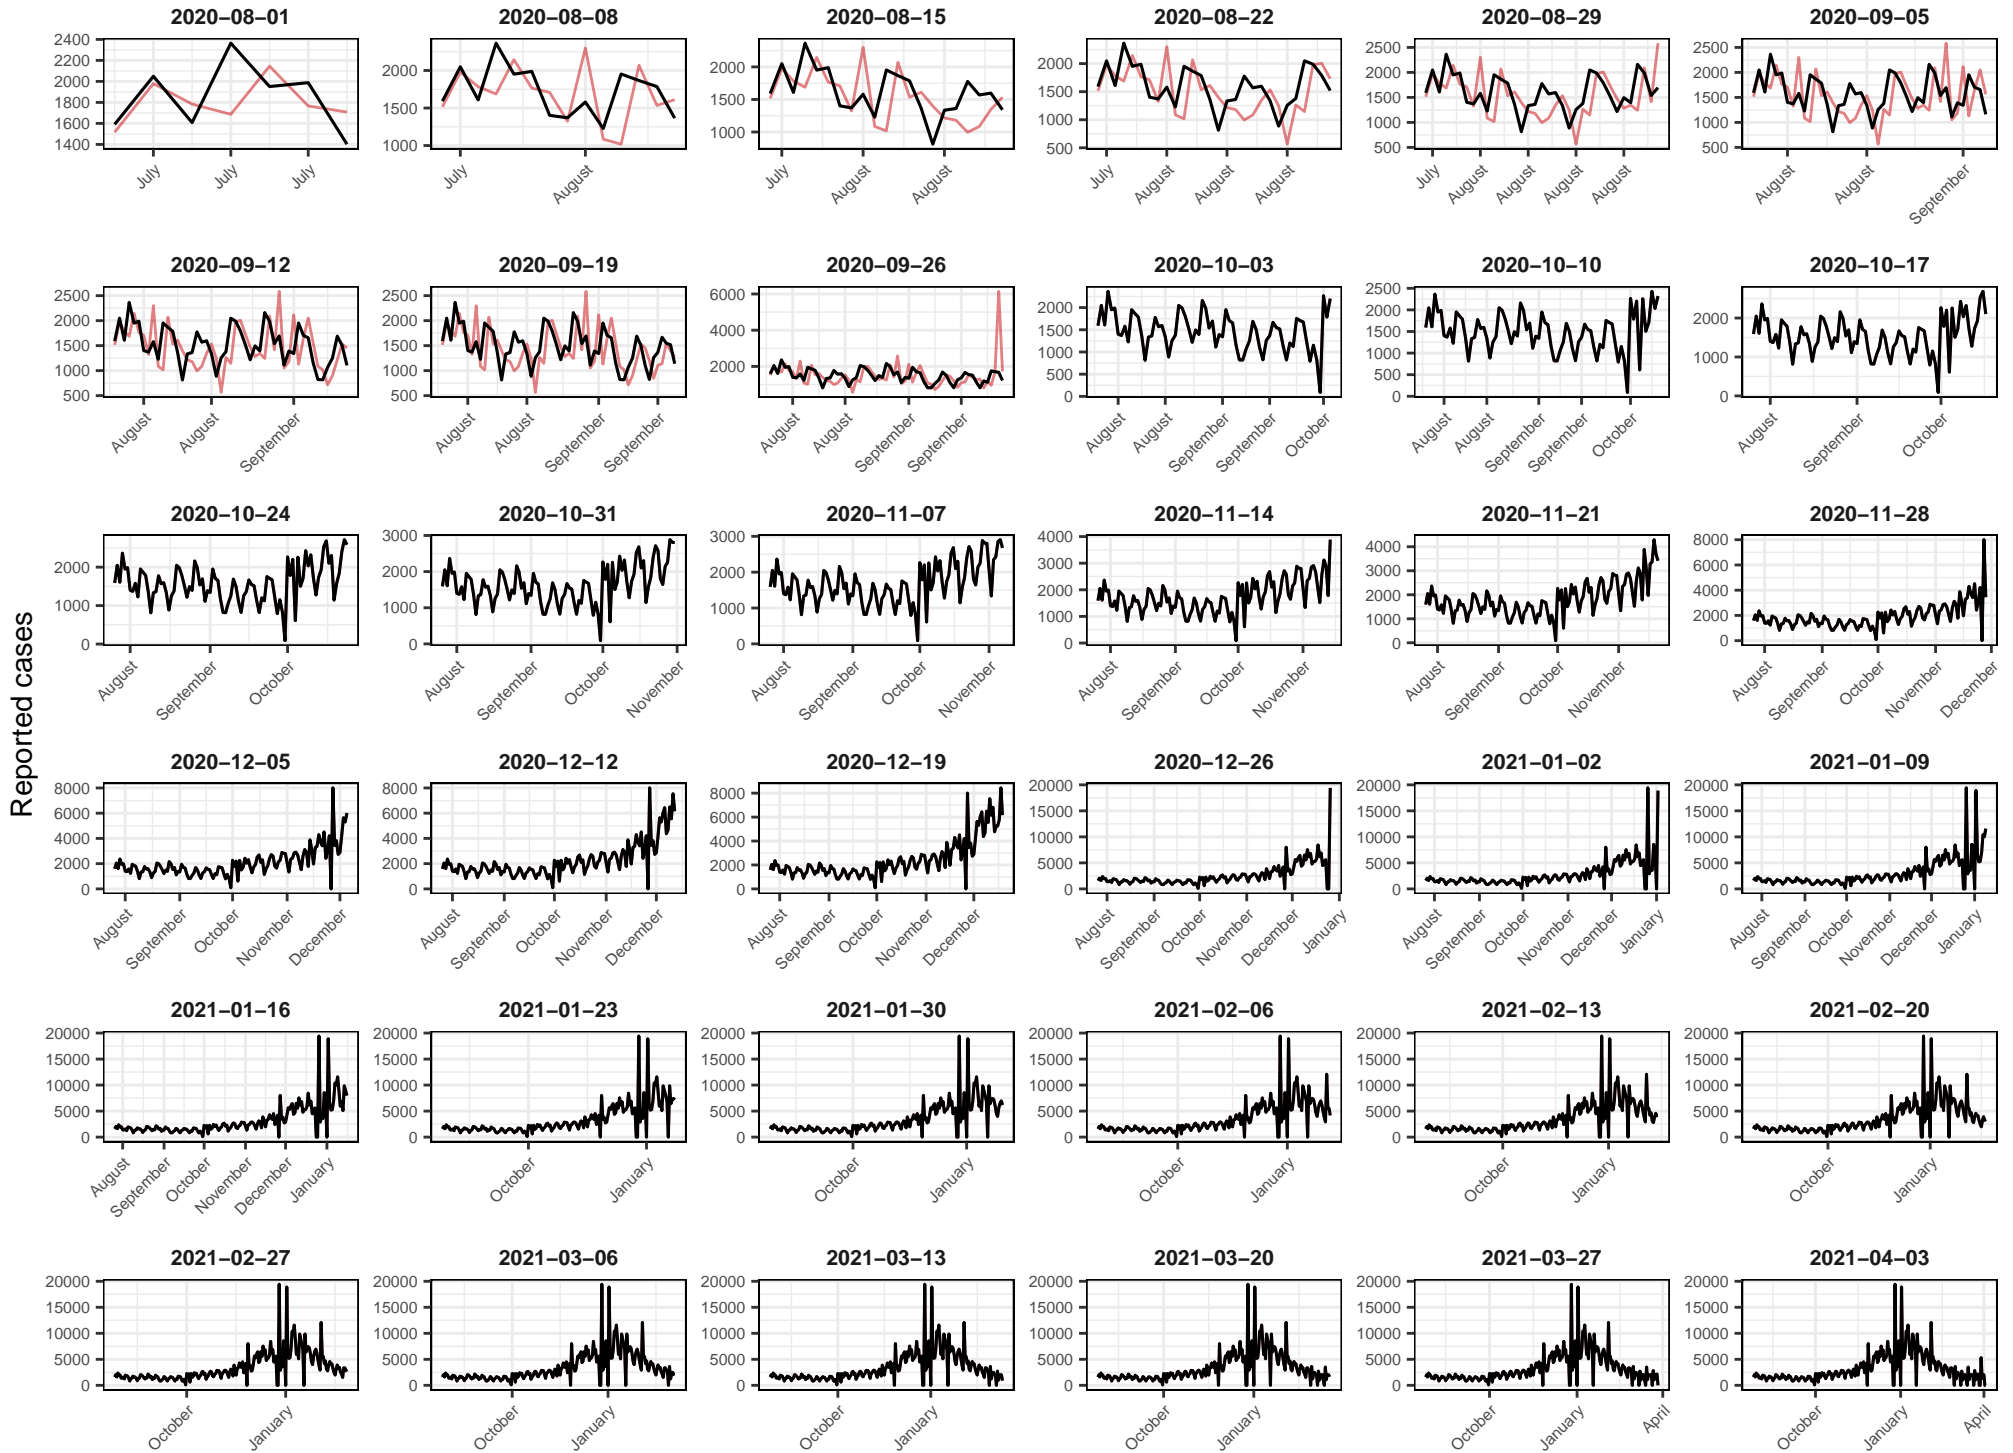

# North Carolina

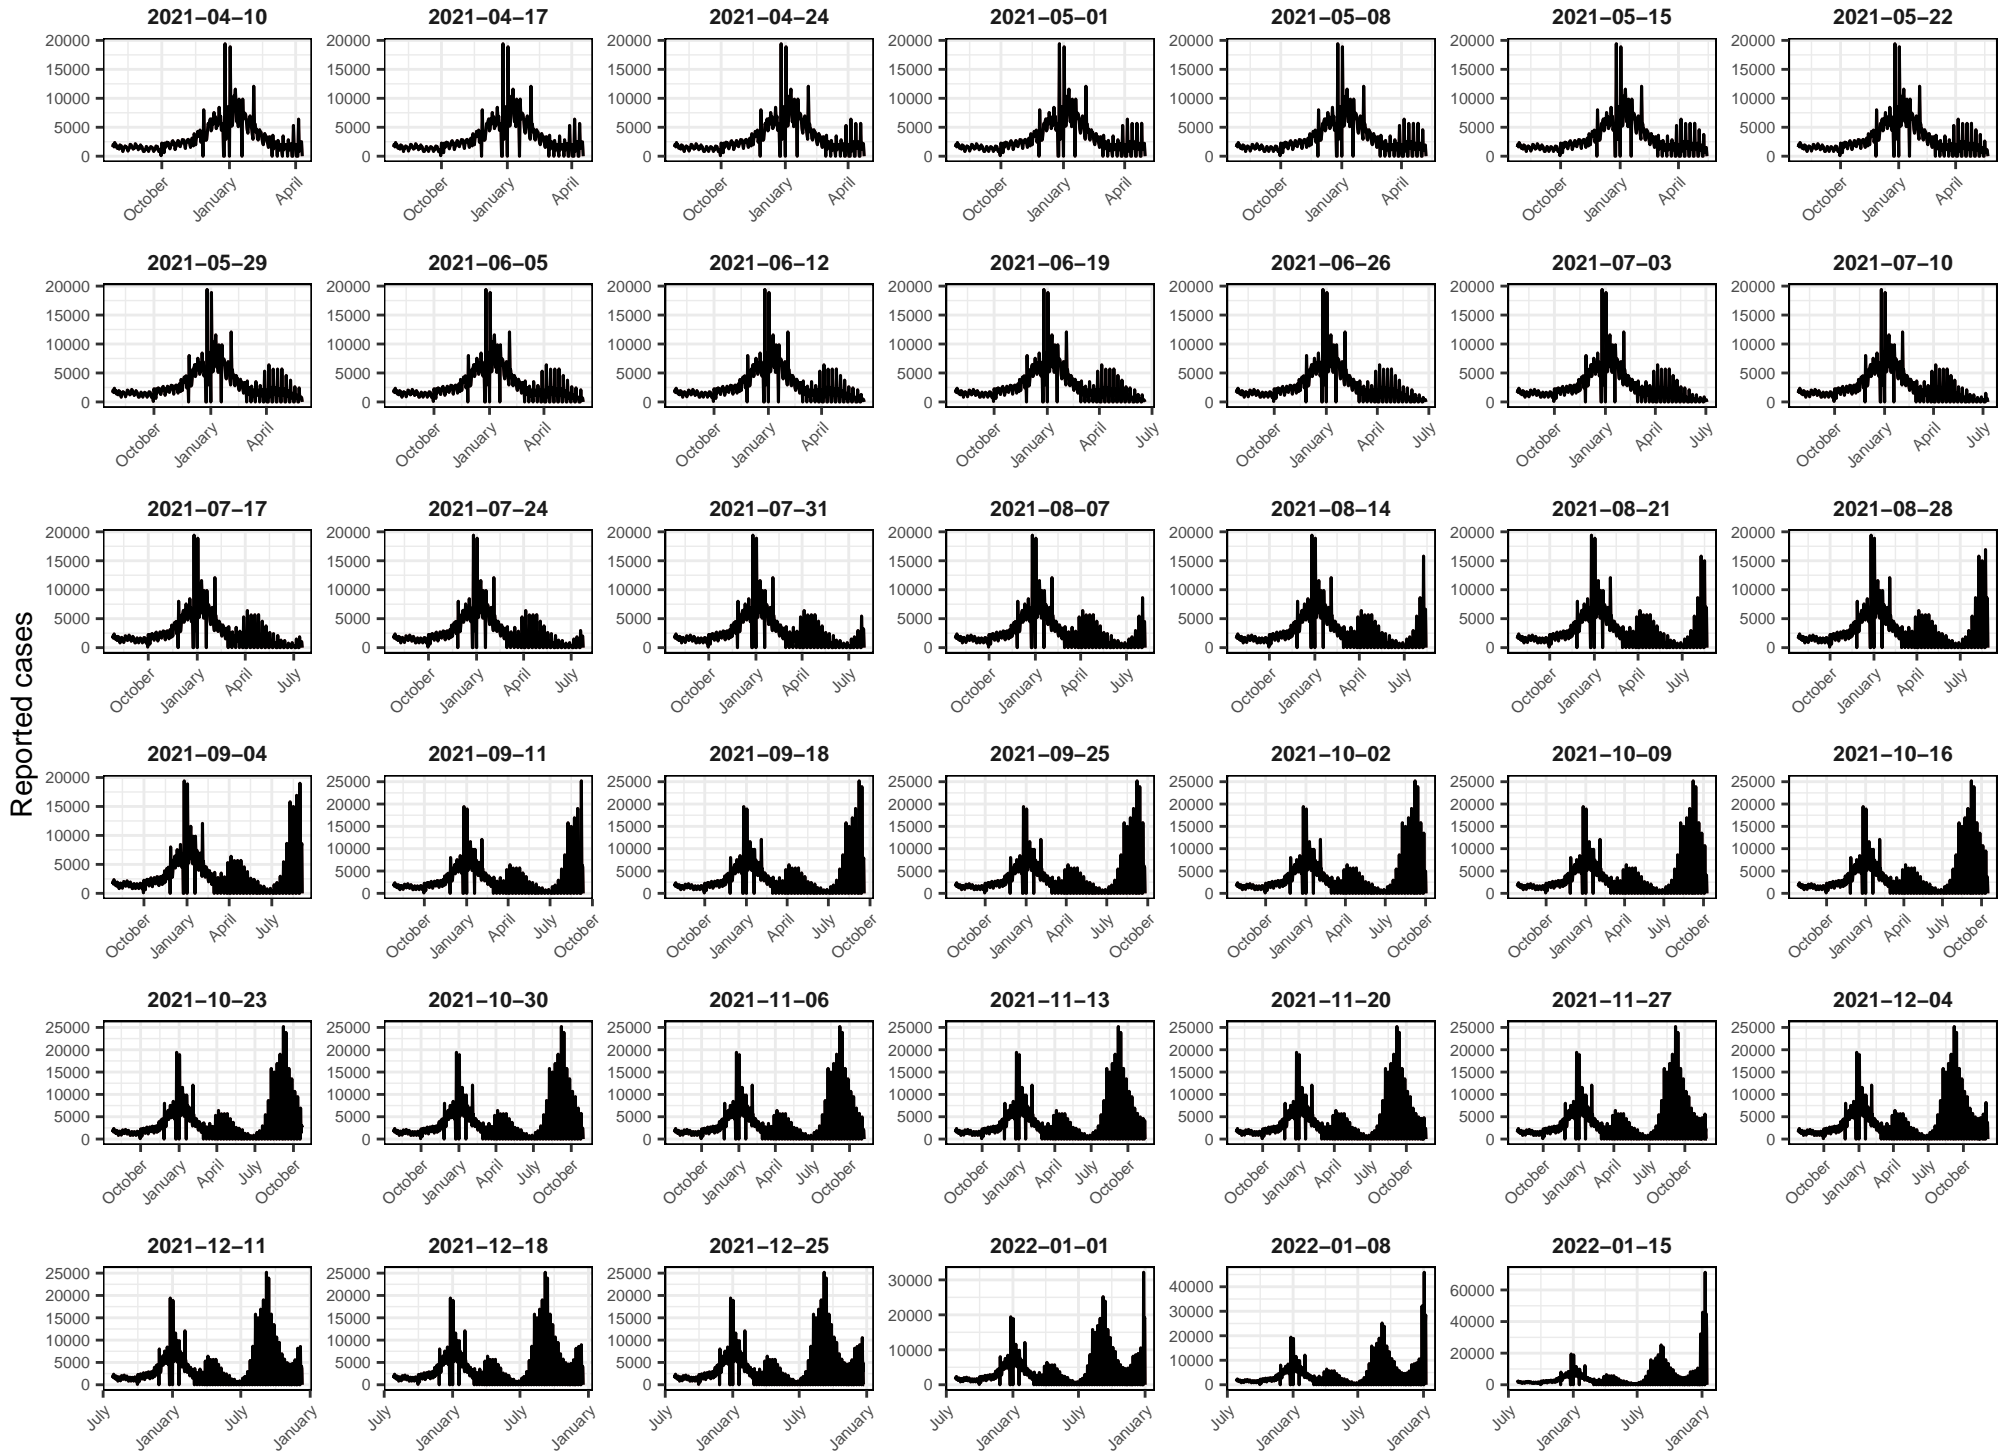

# North Dakota

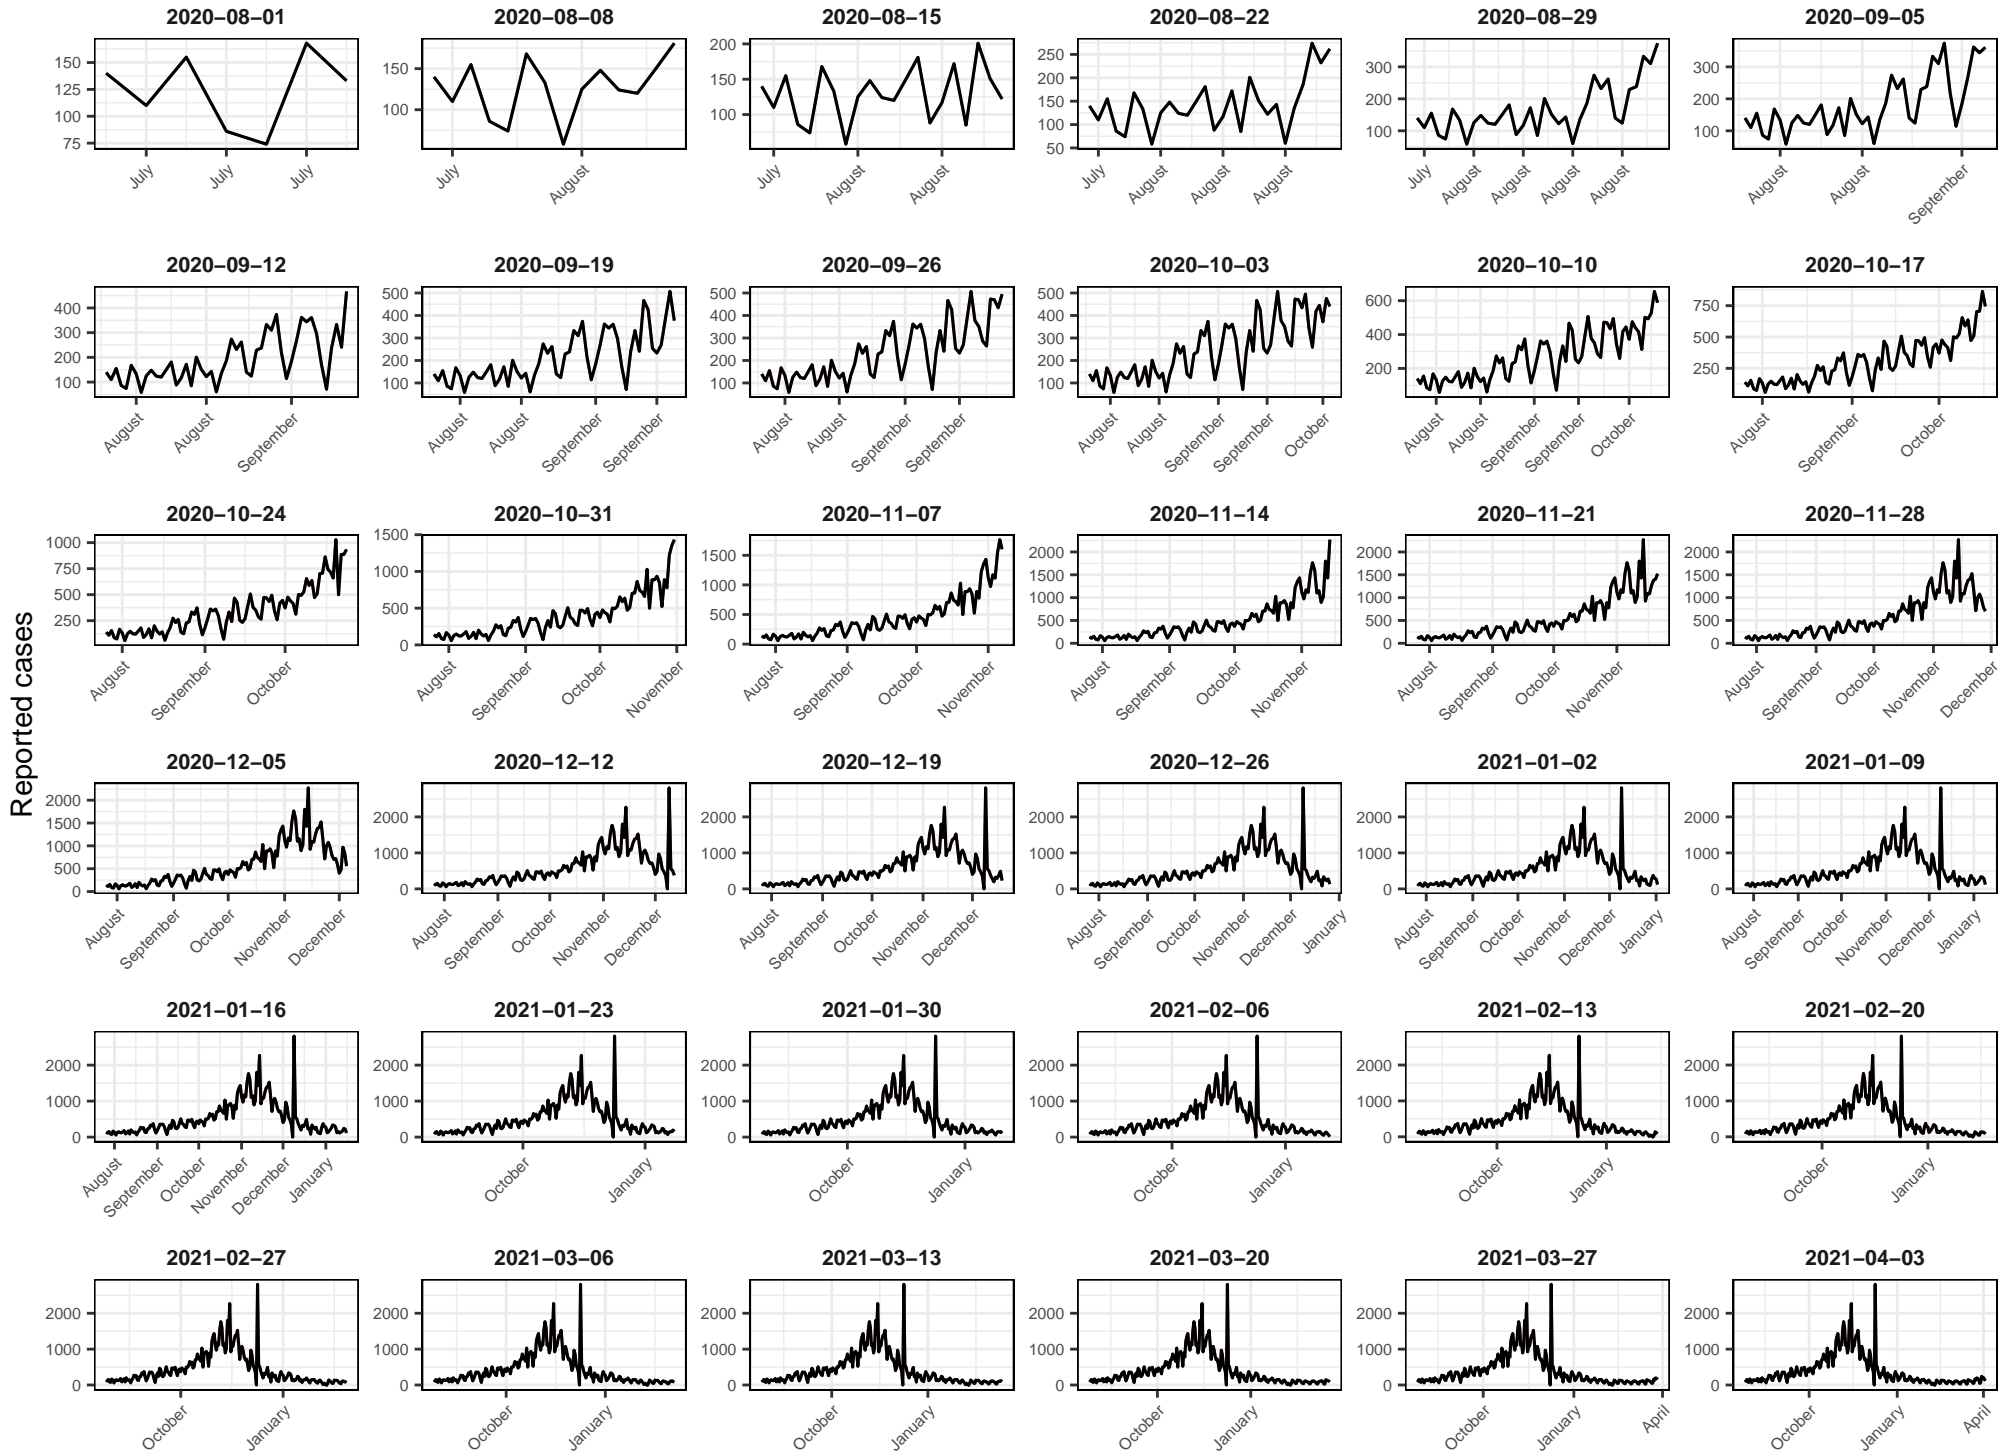

# North Dakota

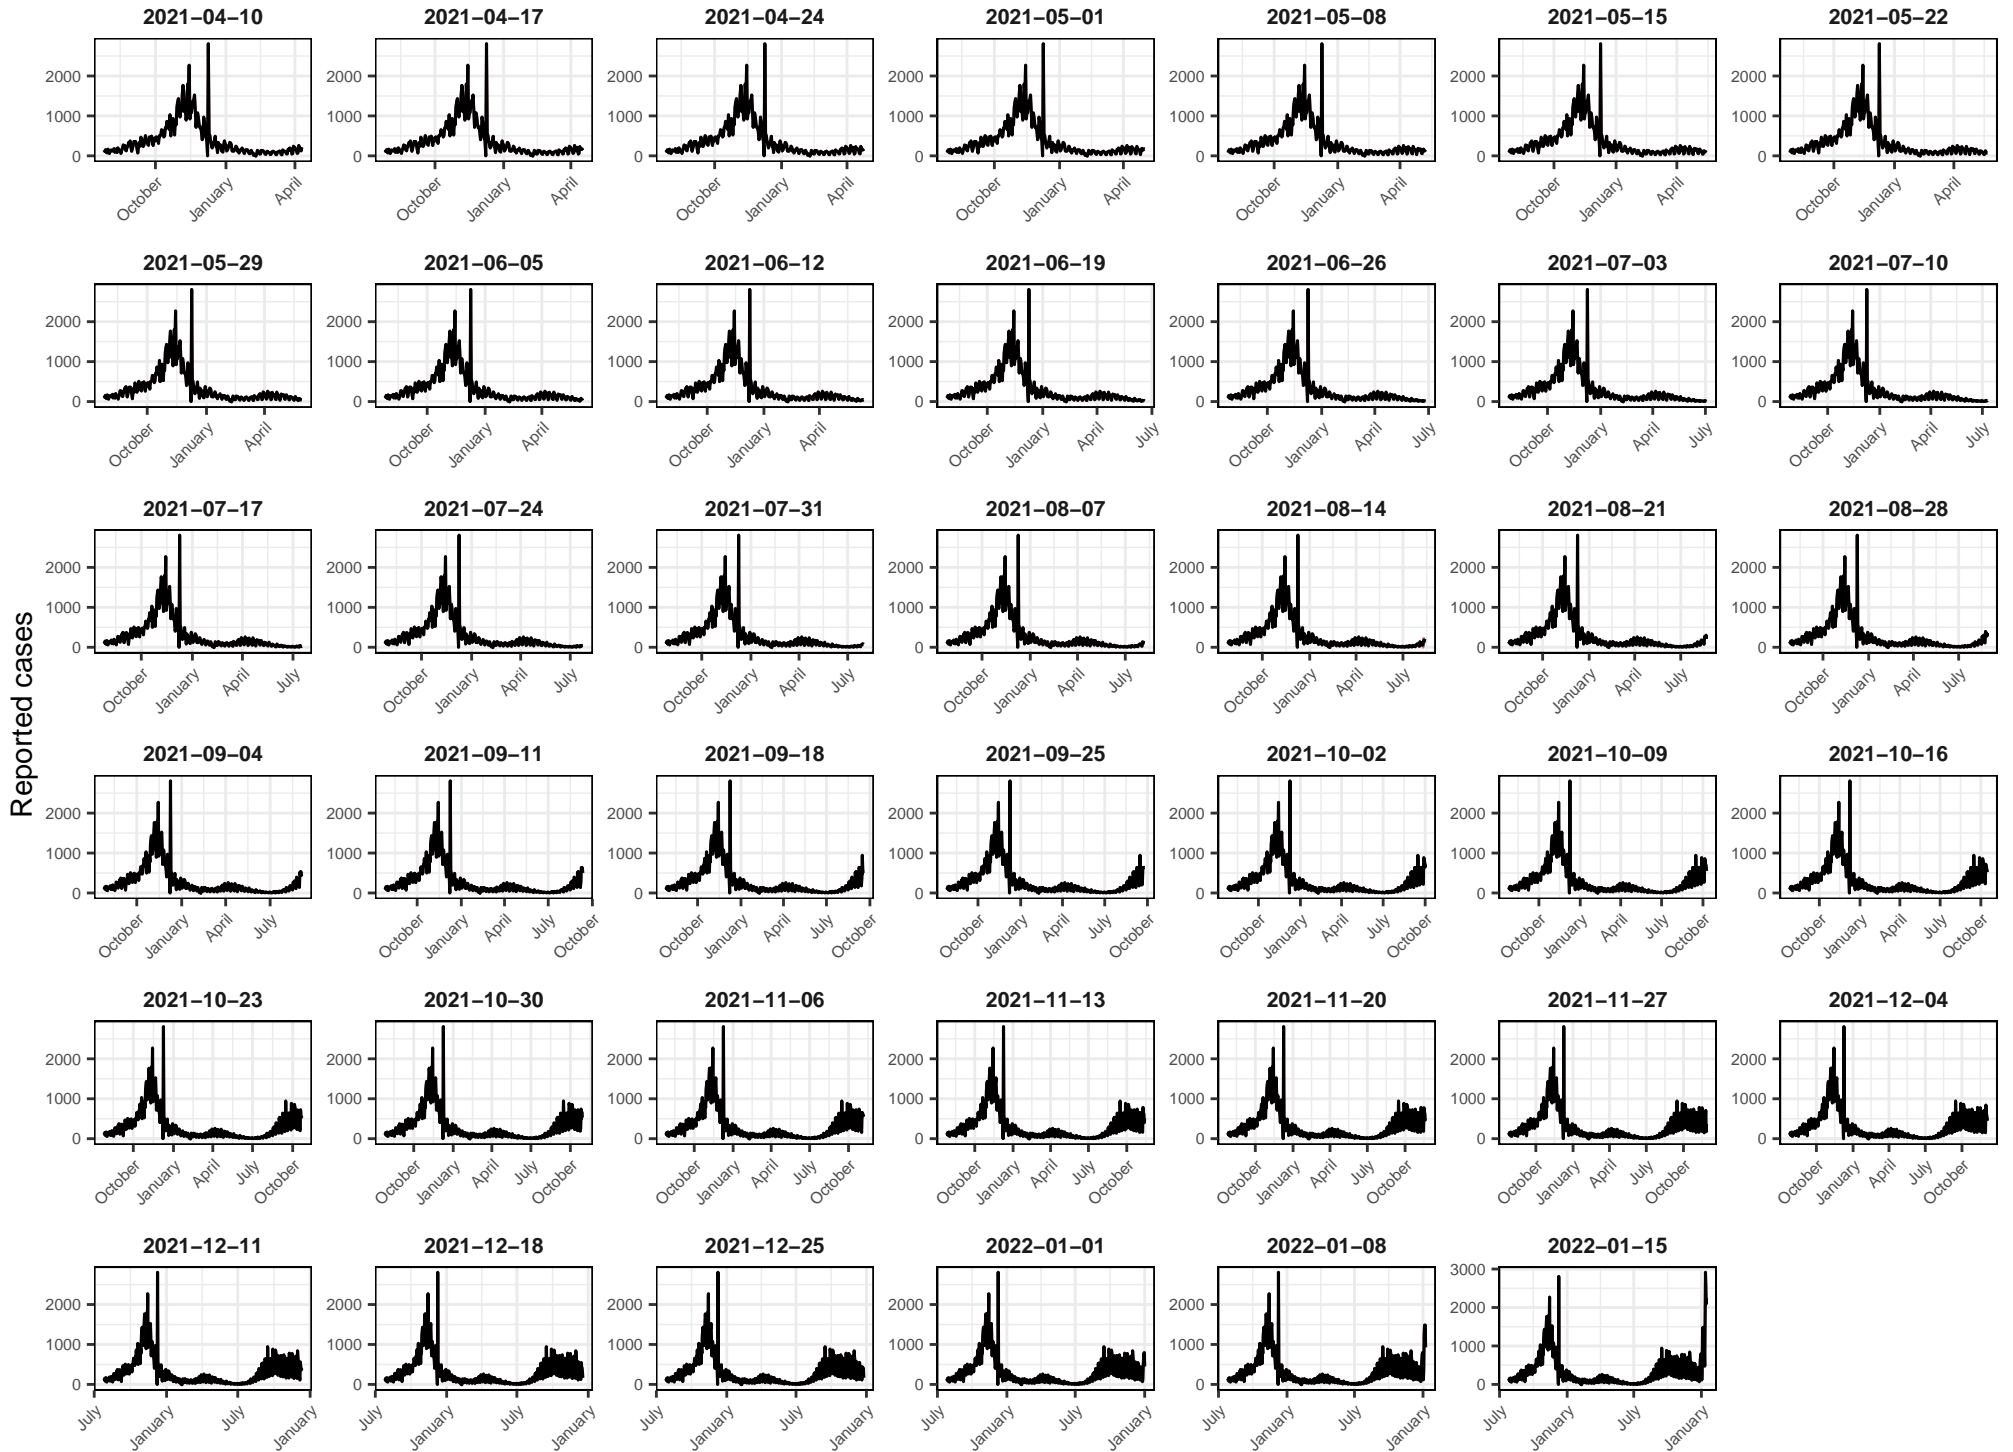

# Ohio

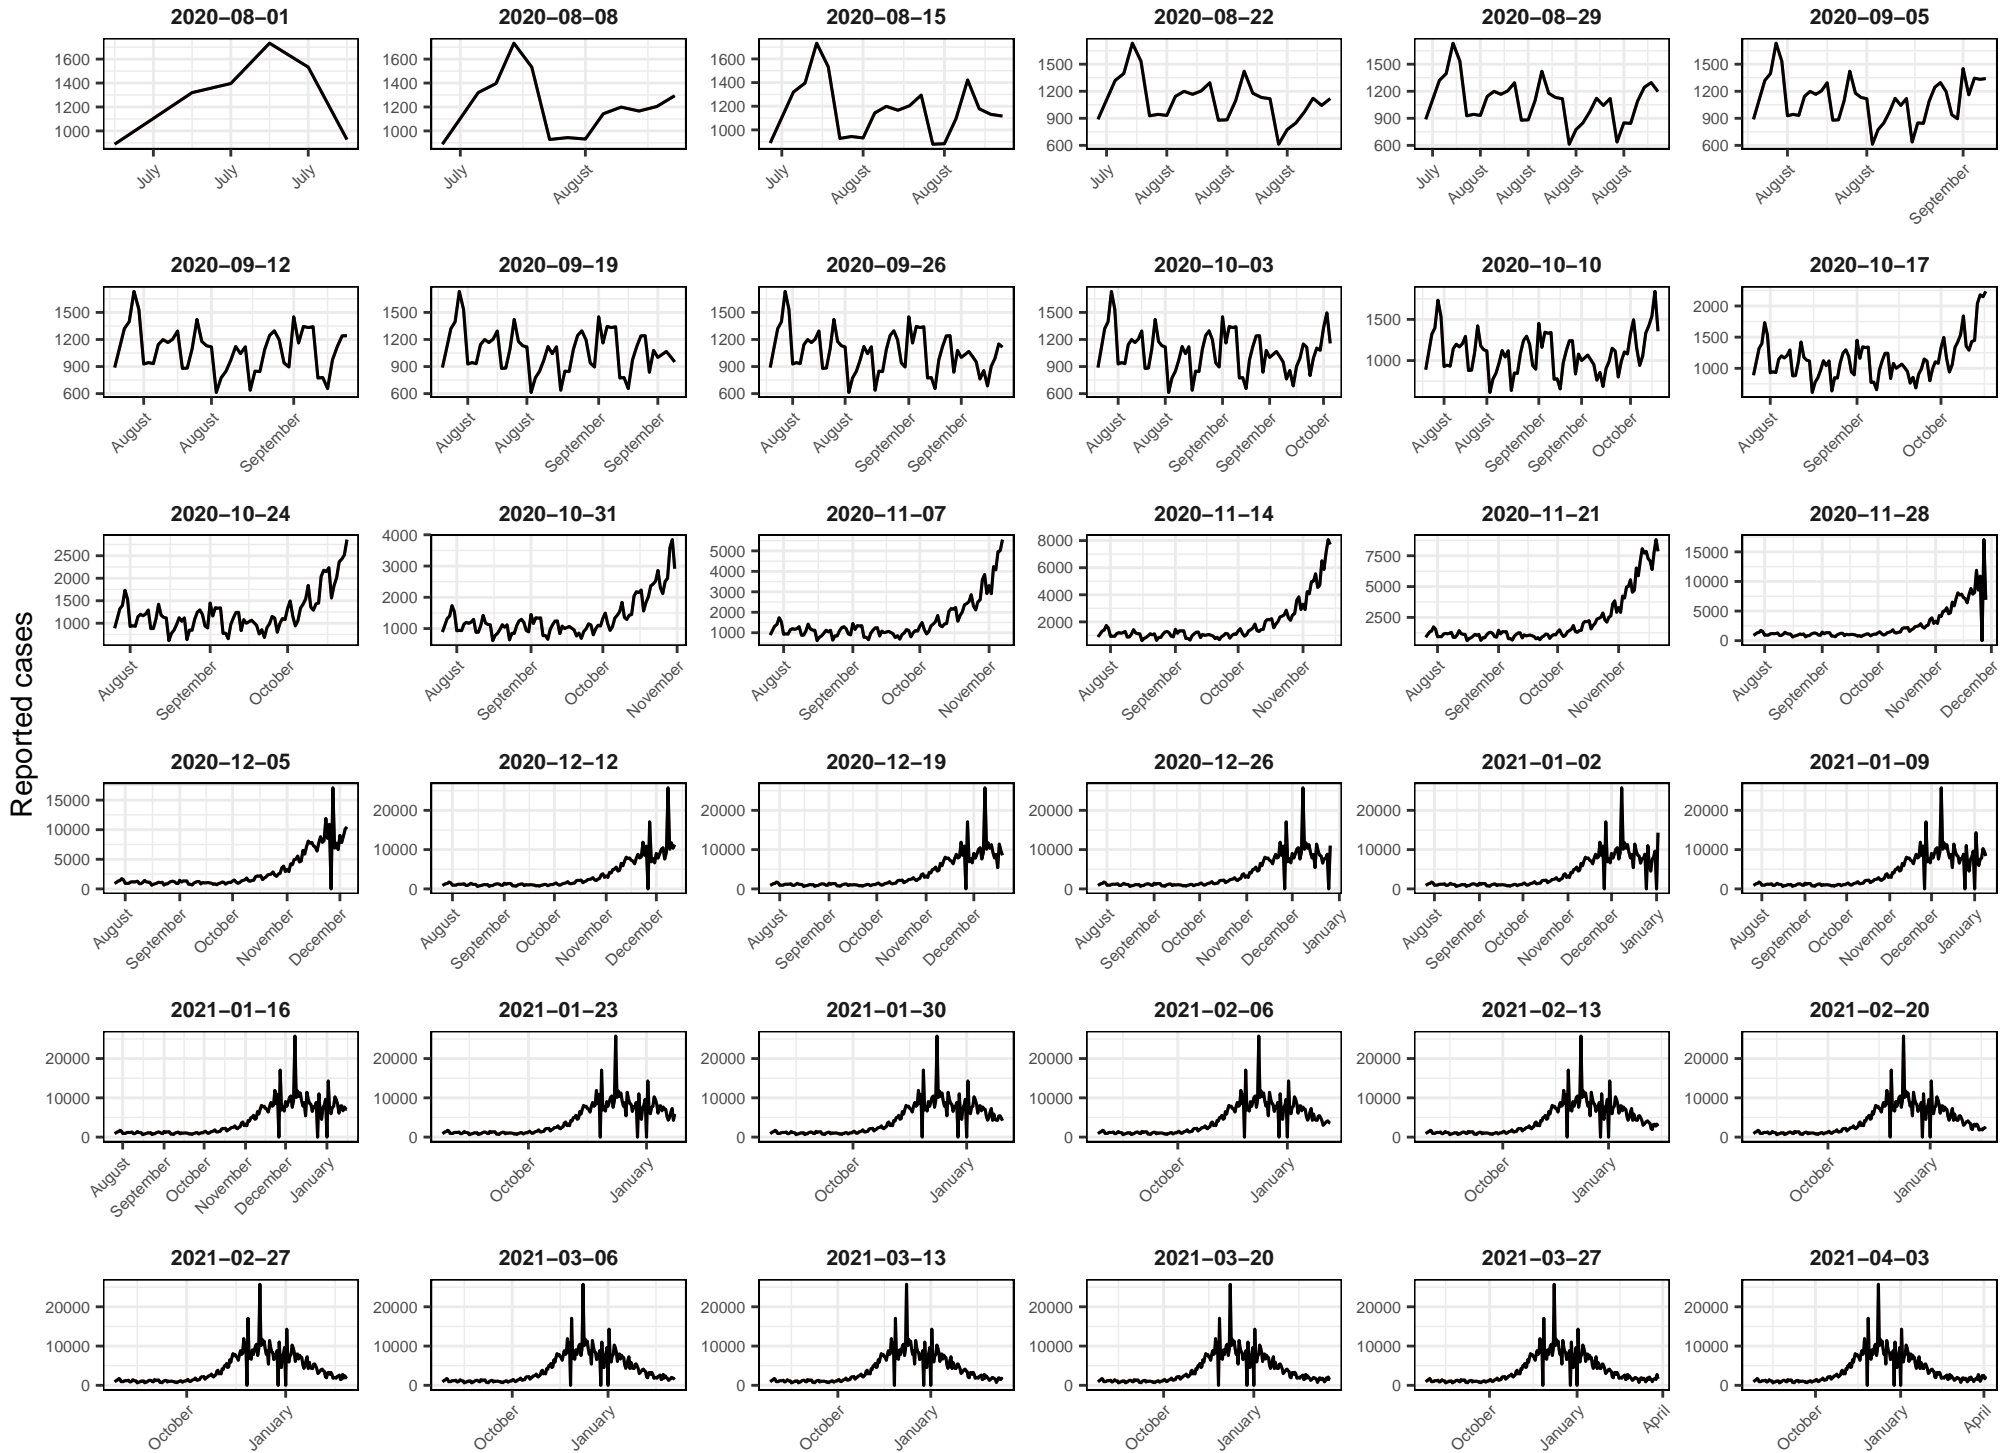

# Ohio

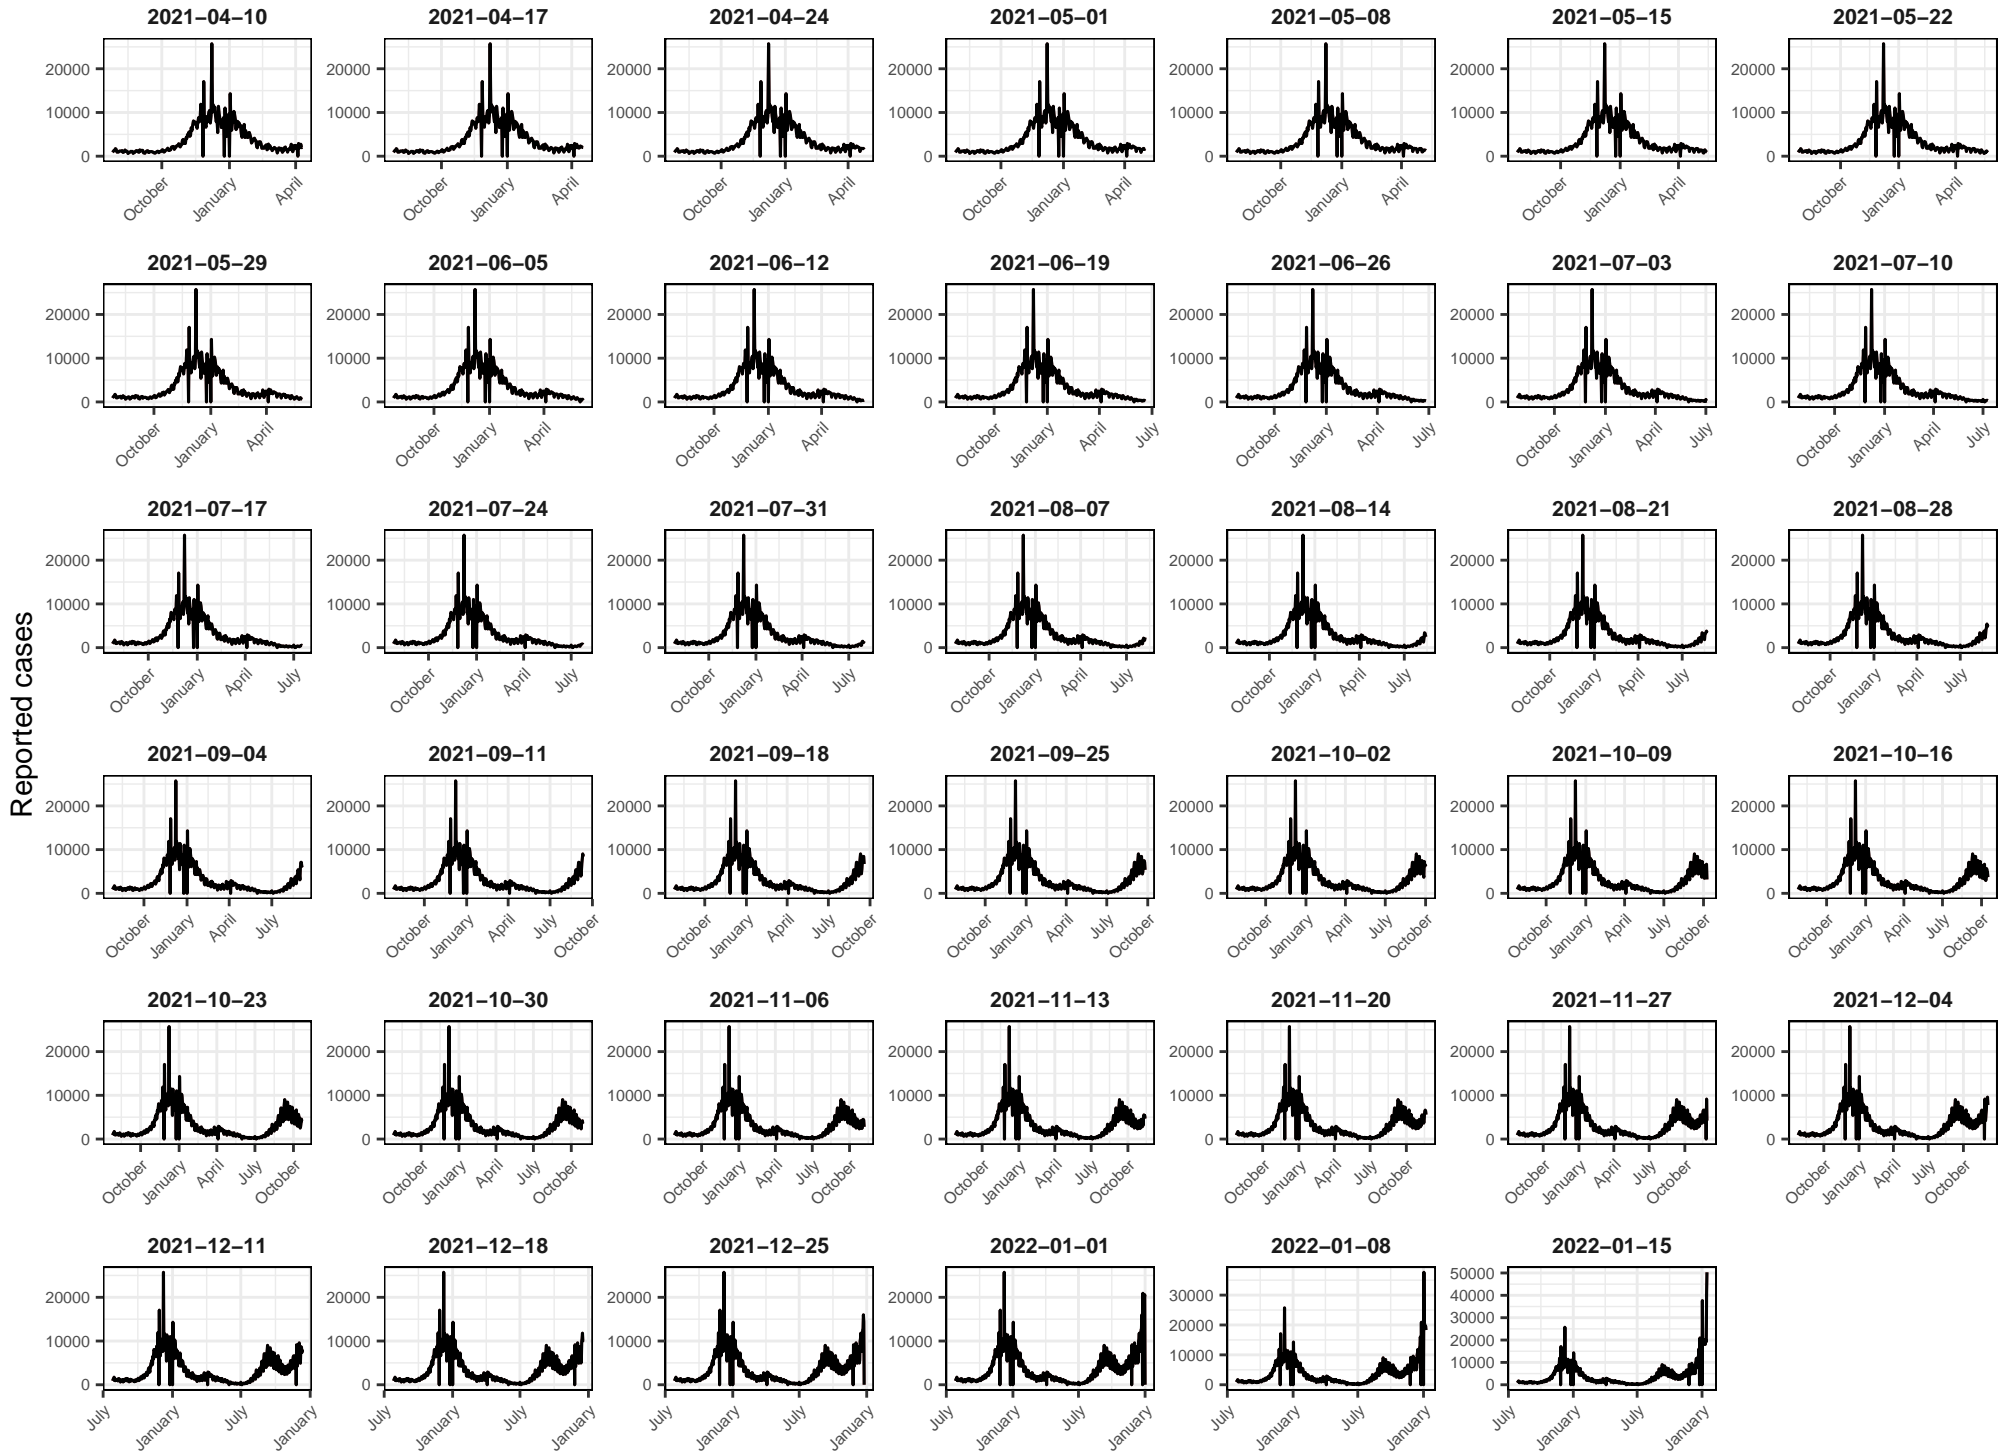



# Oklahoma

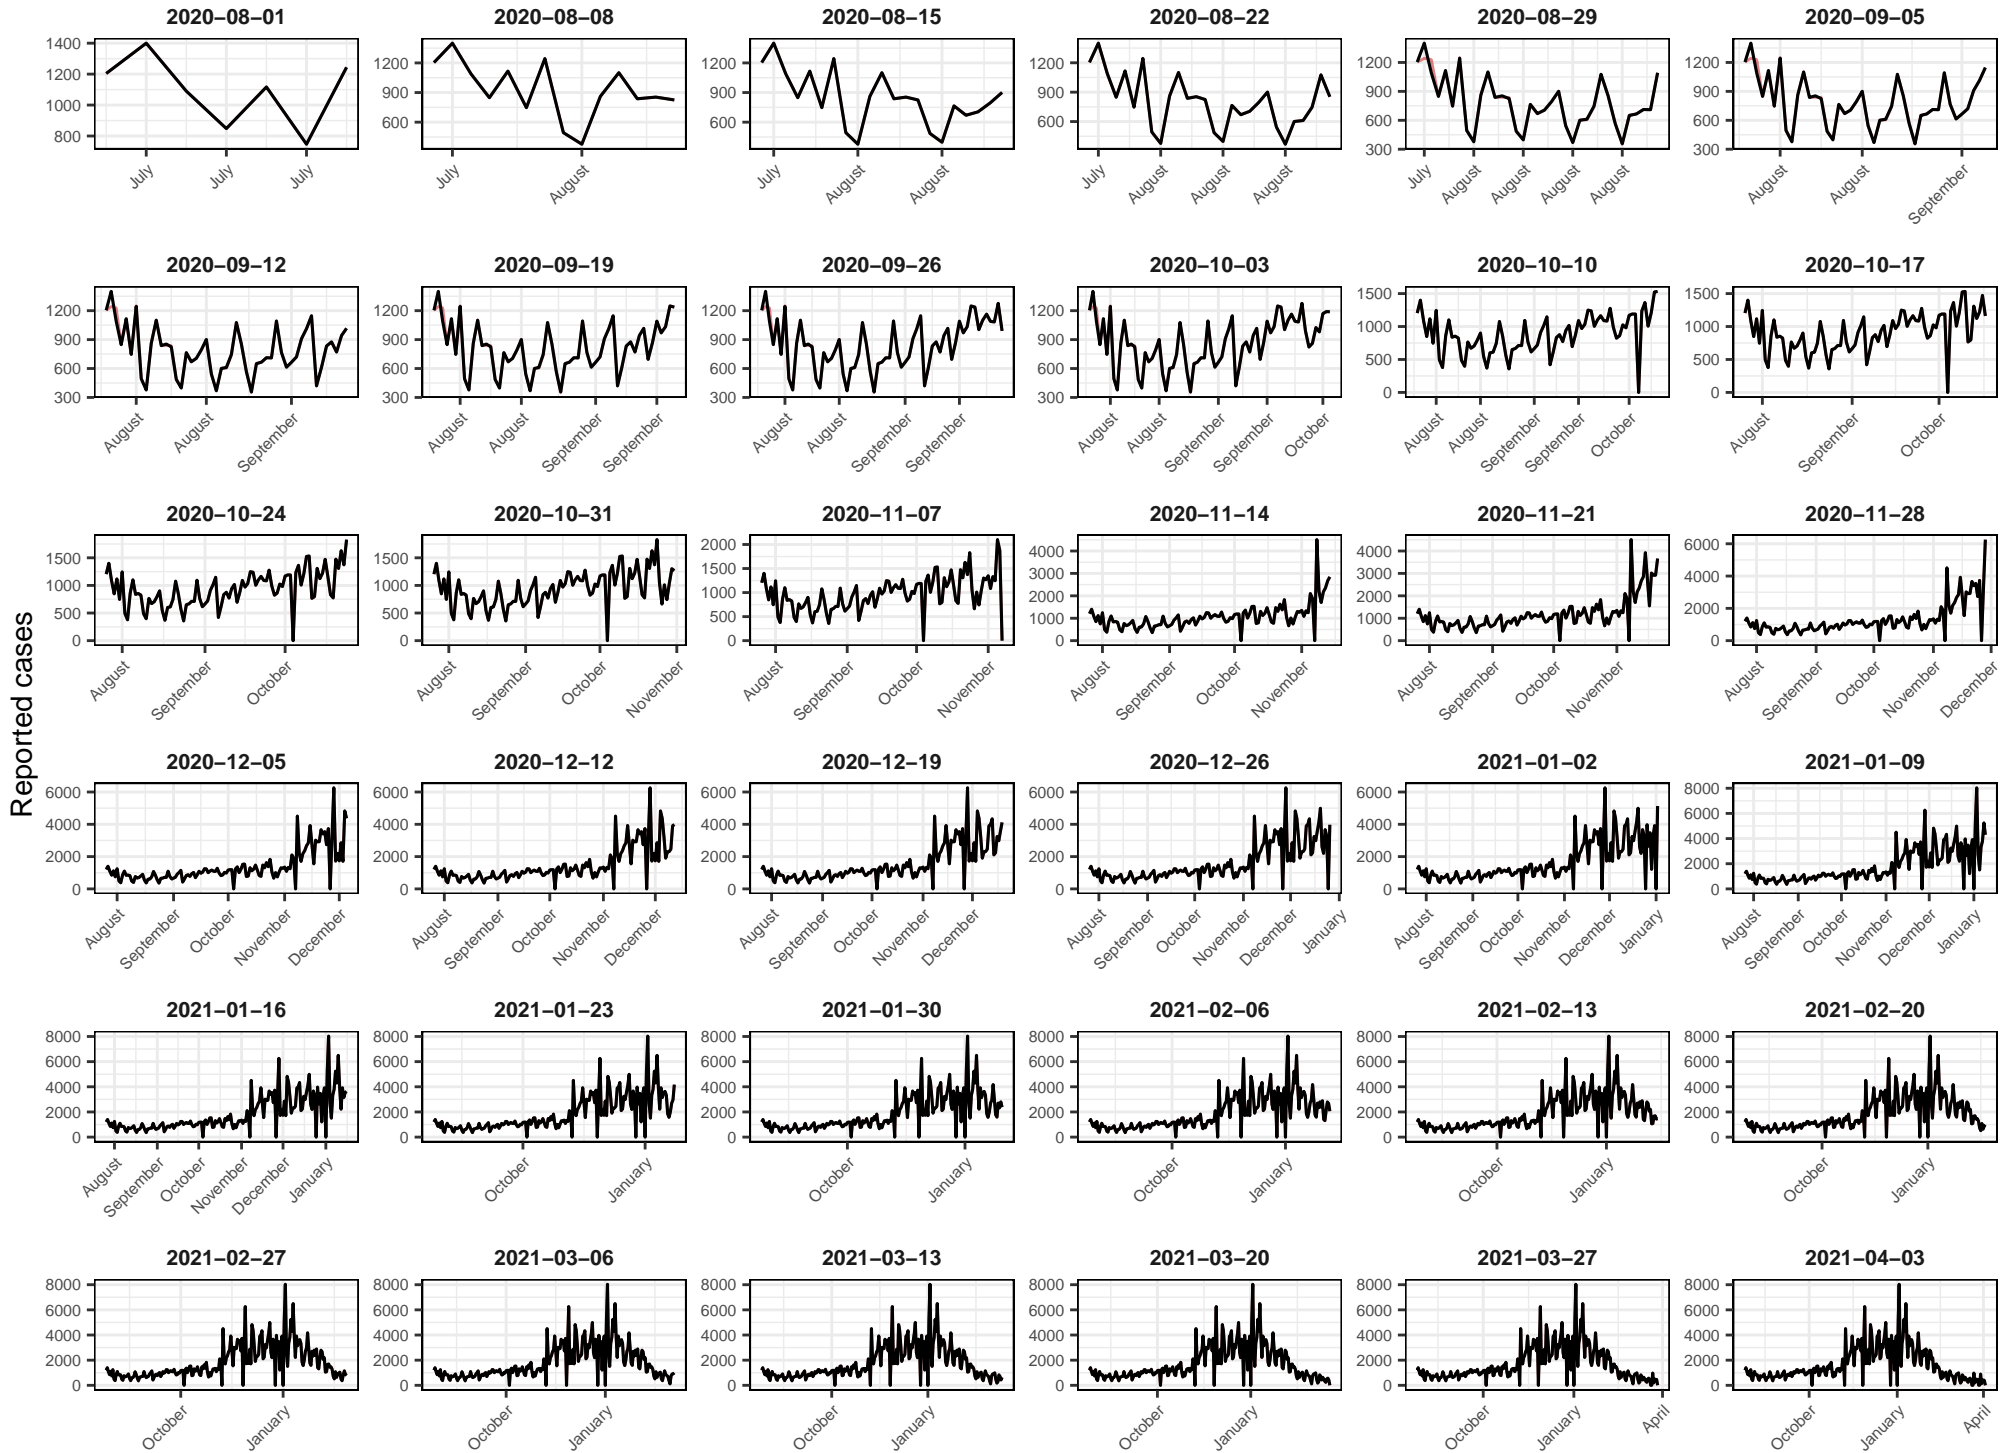

# Oklahoma

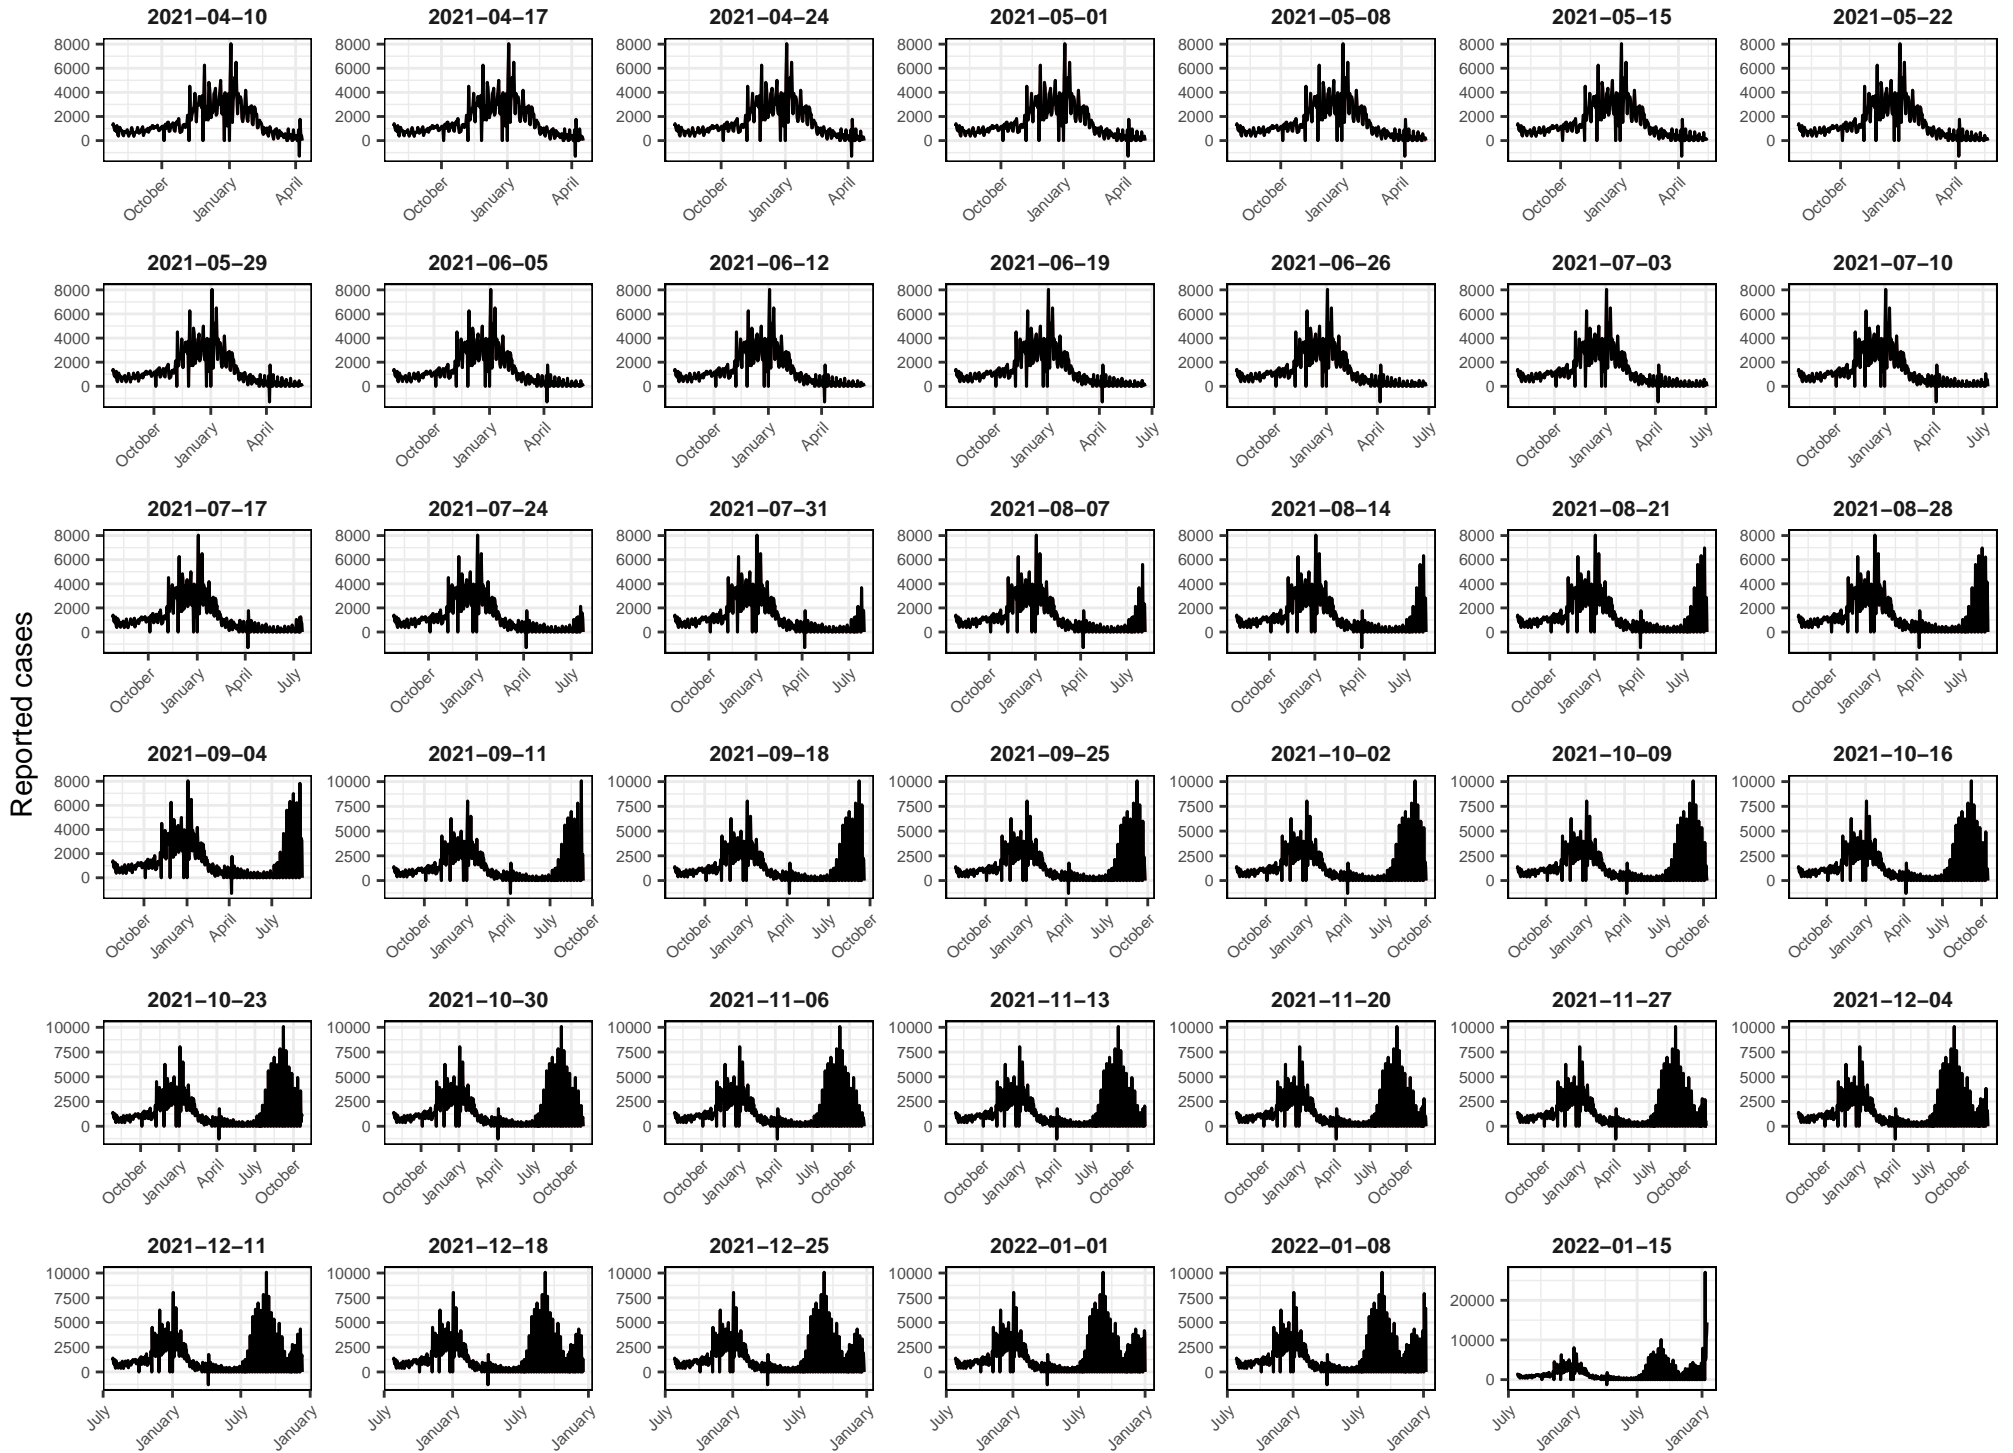

# Oregon

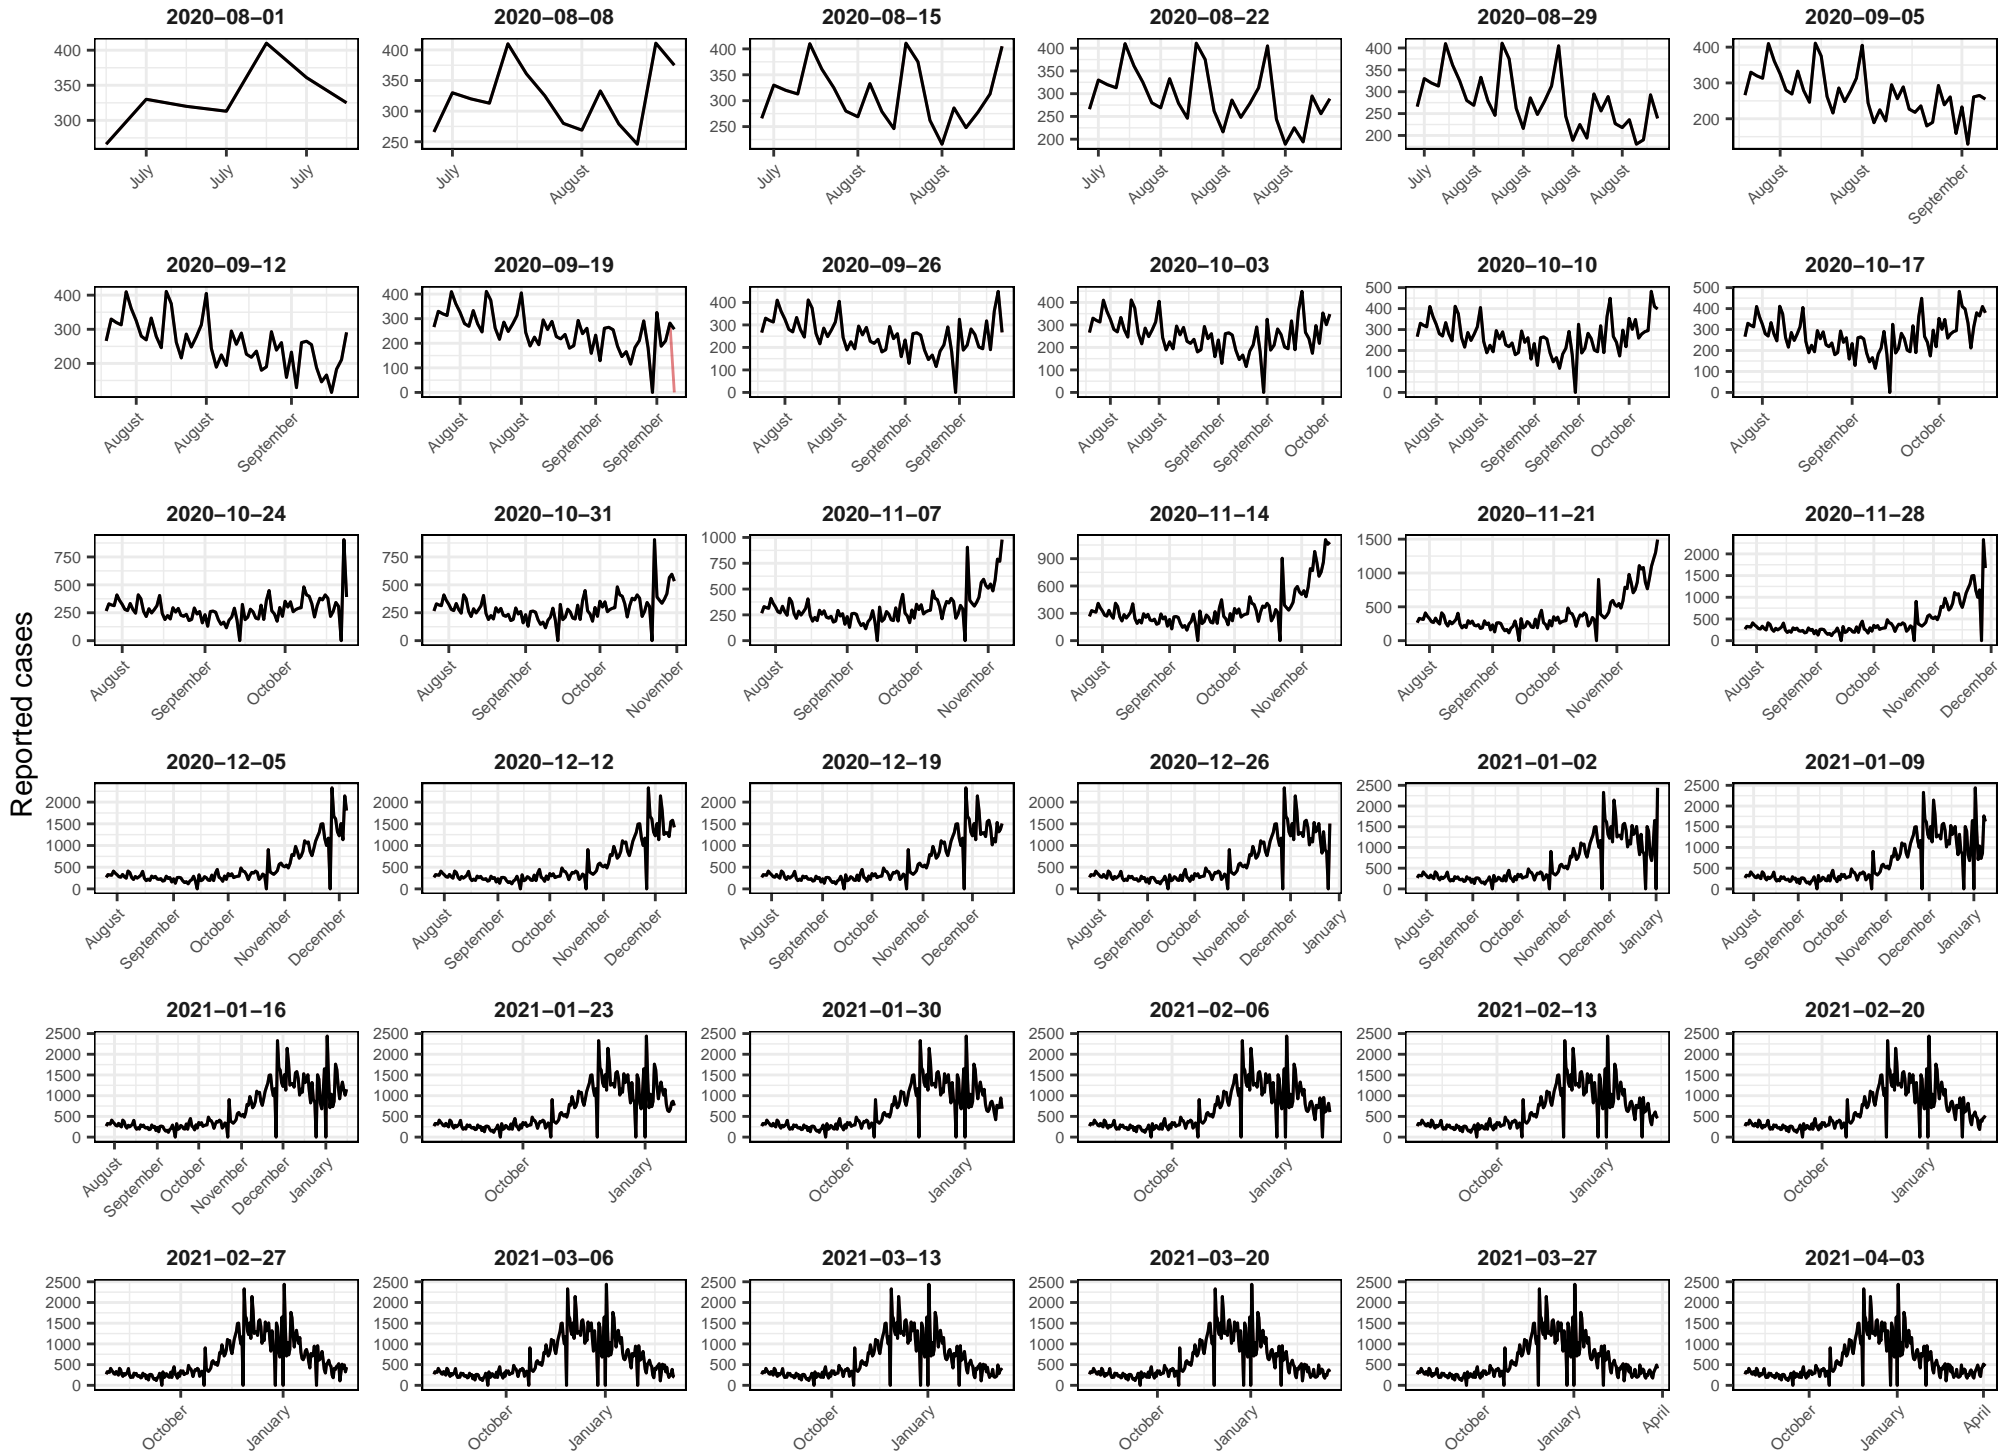

# Oregon

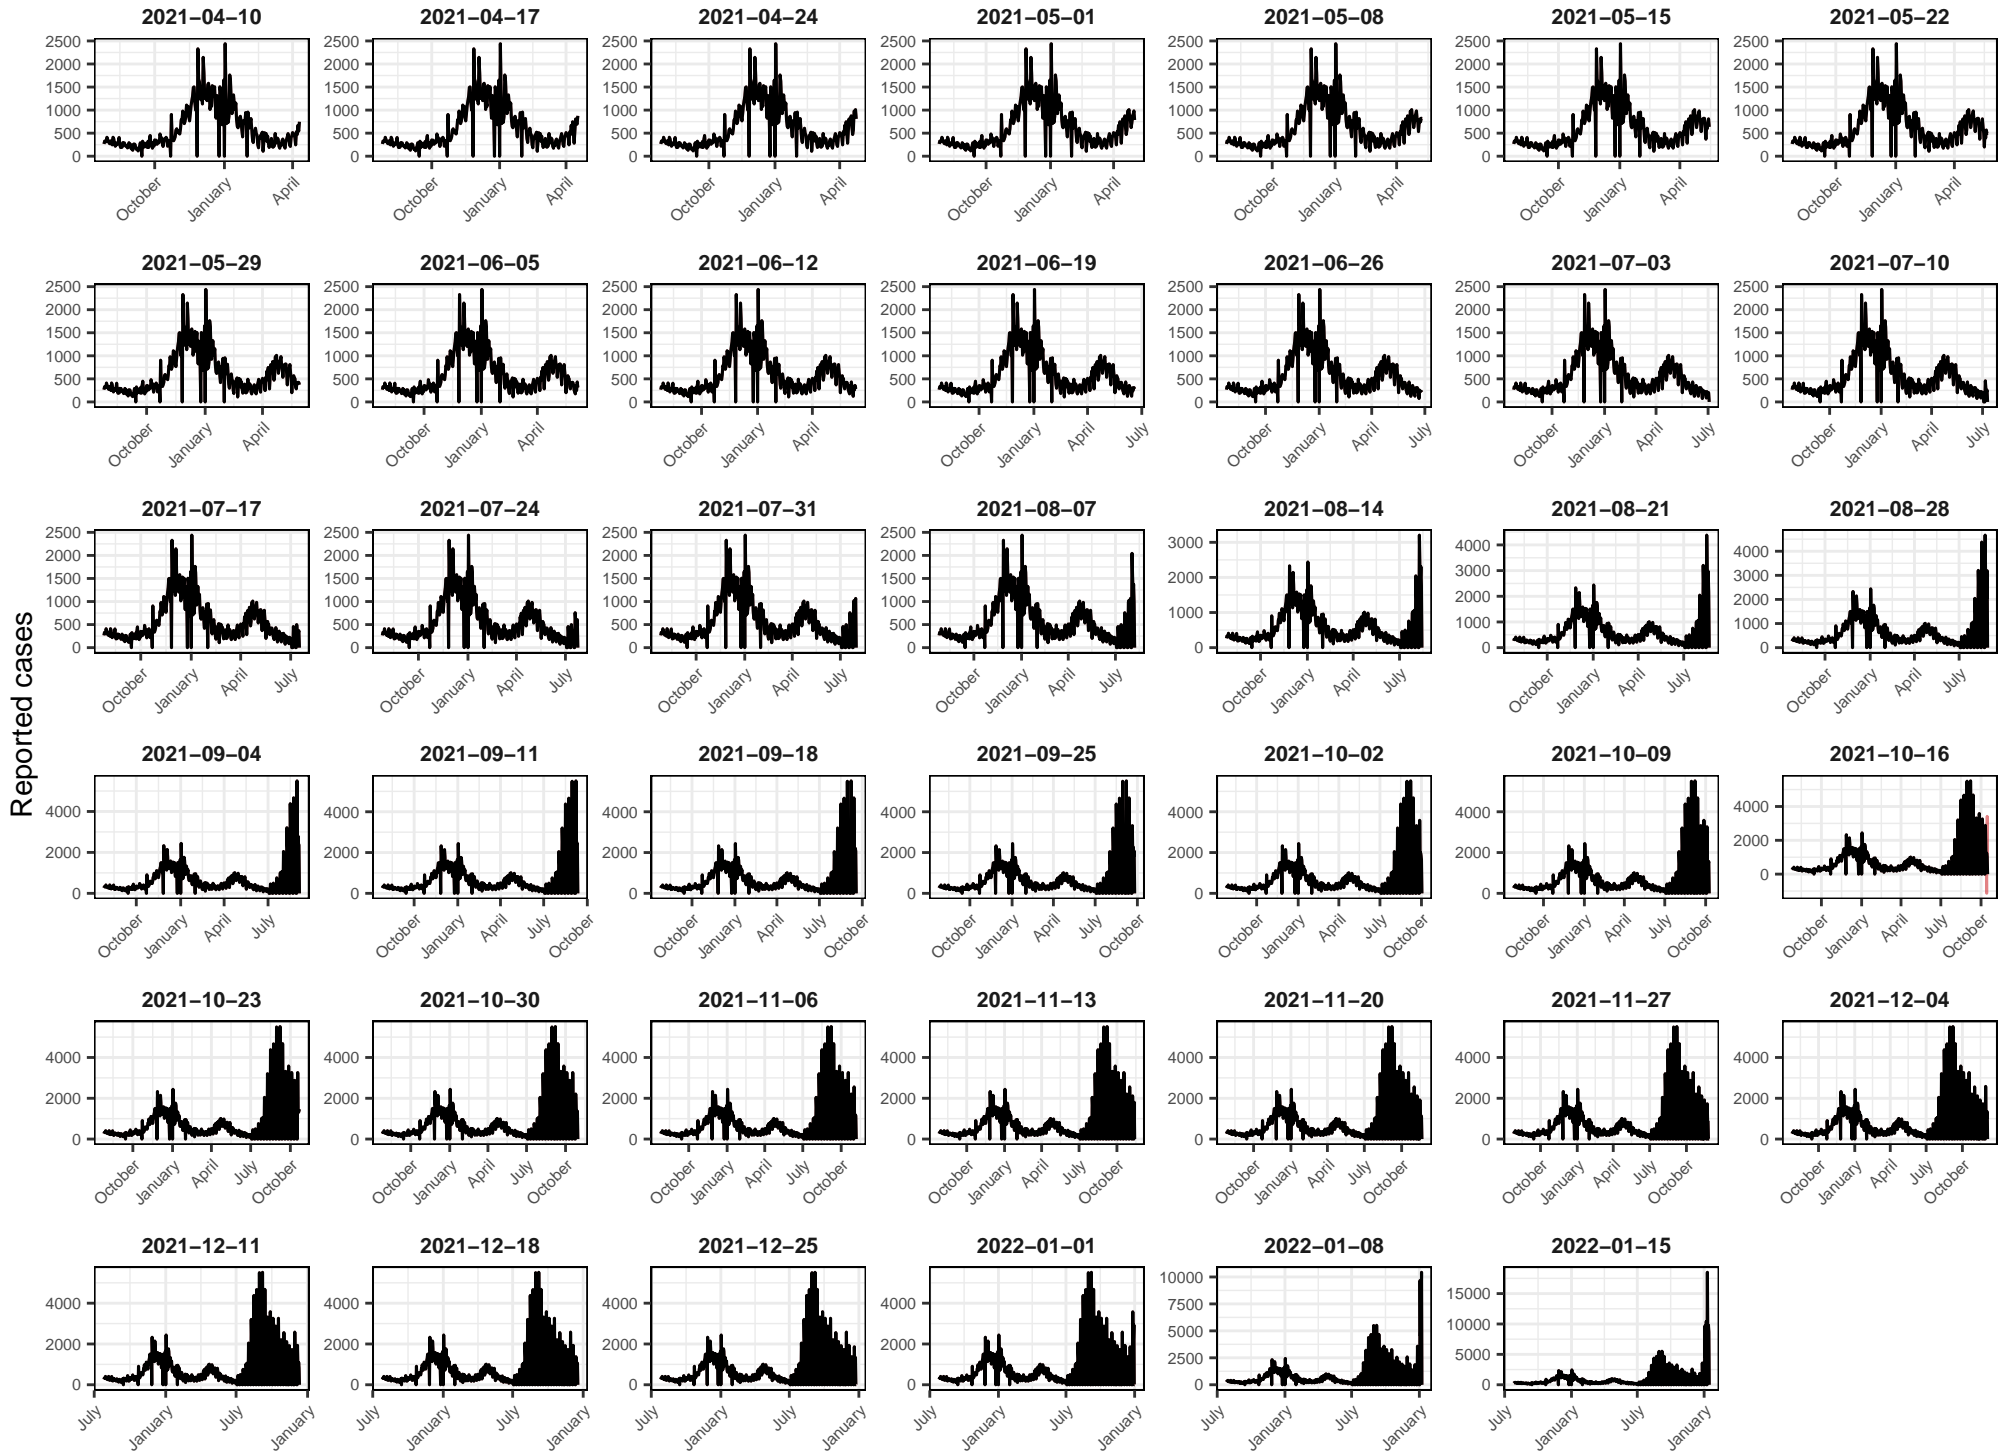

# Pennsylvania

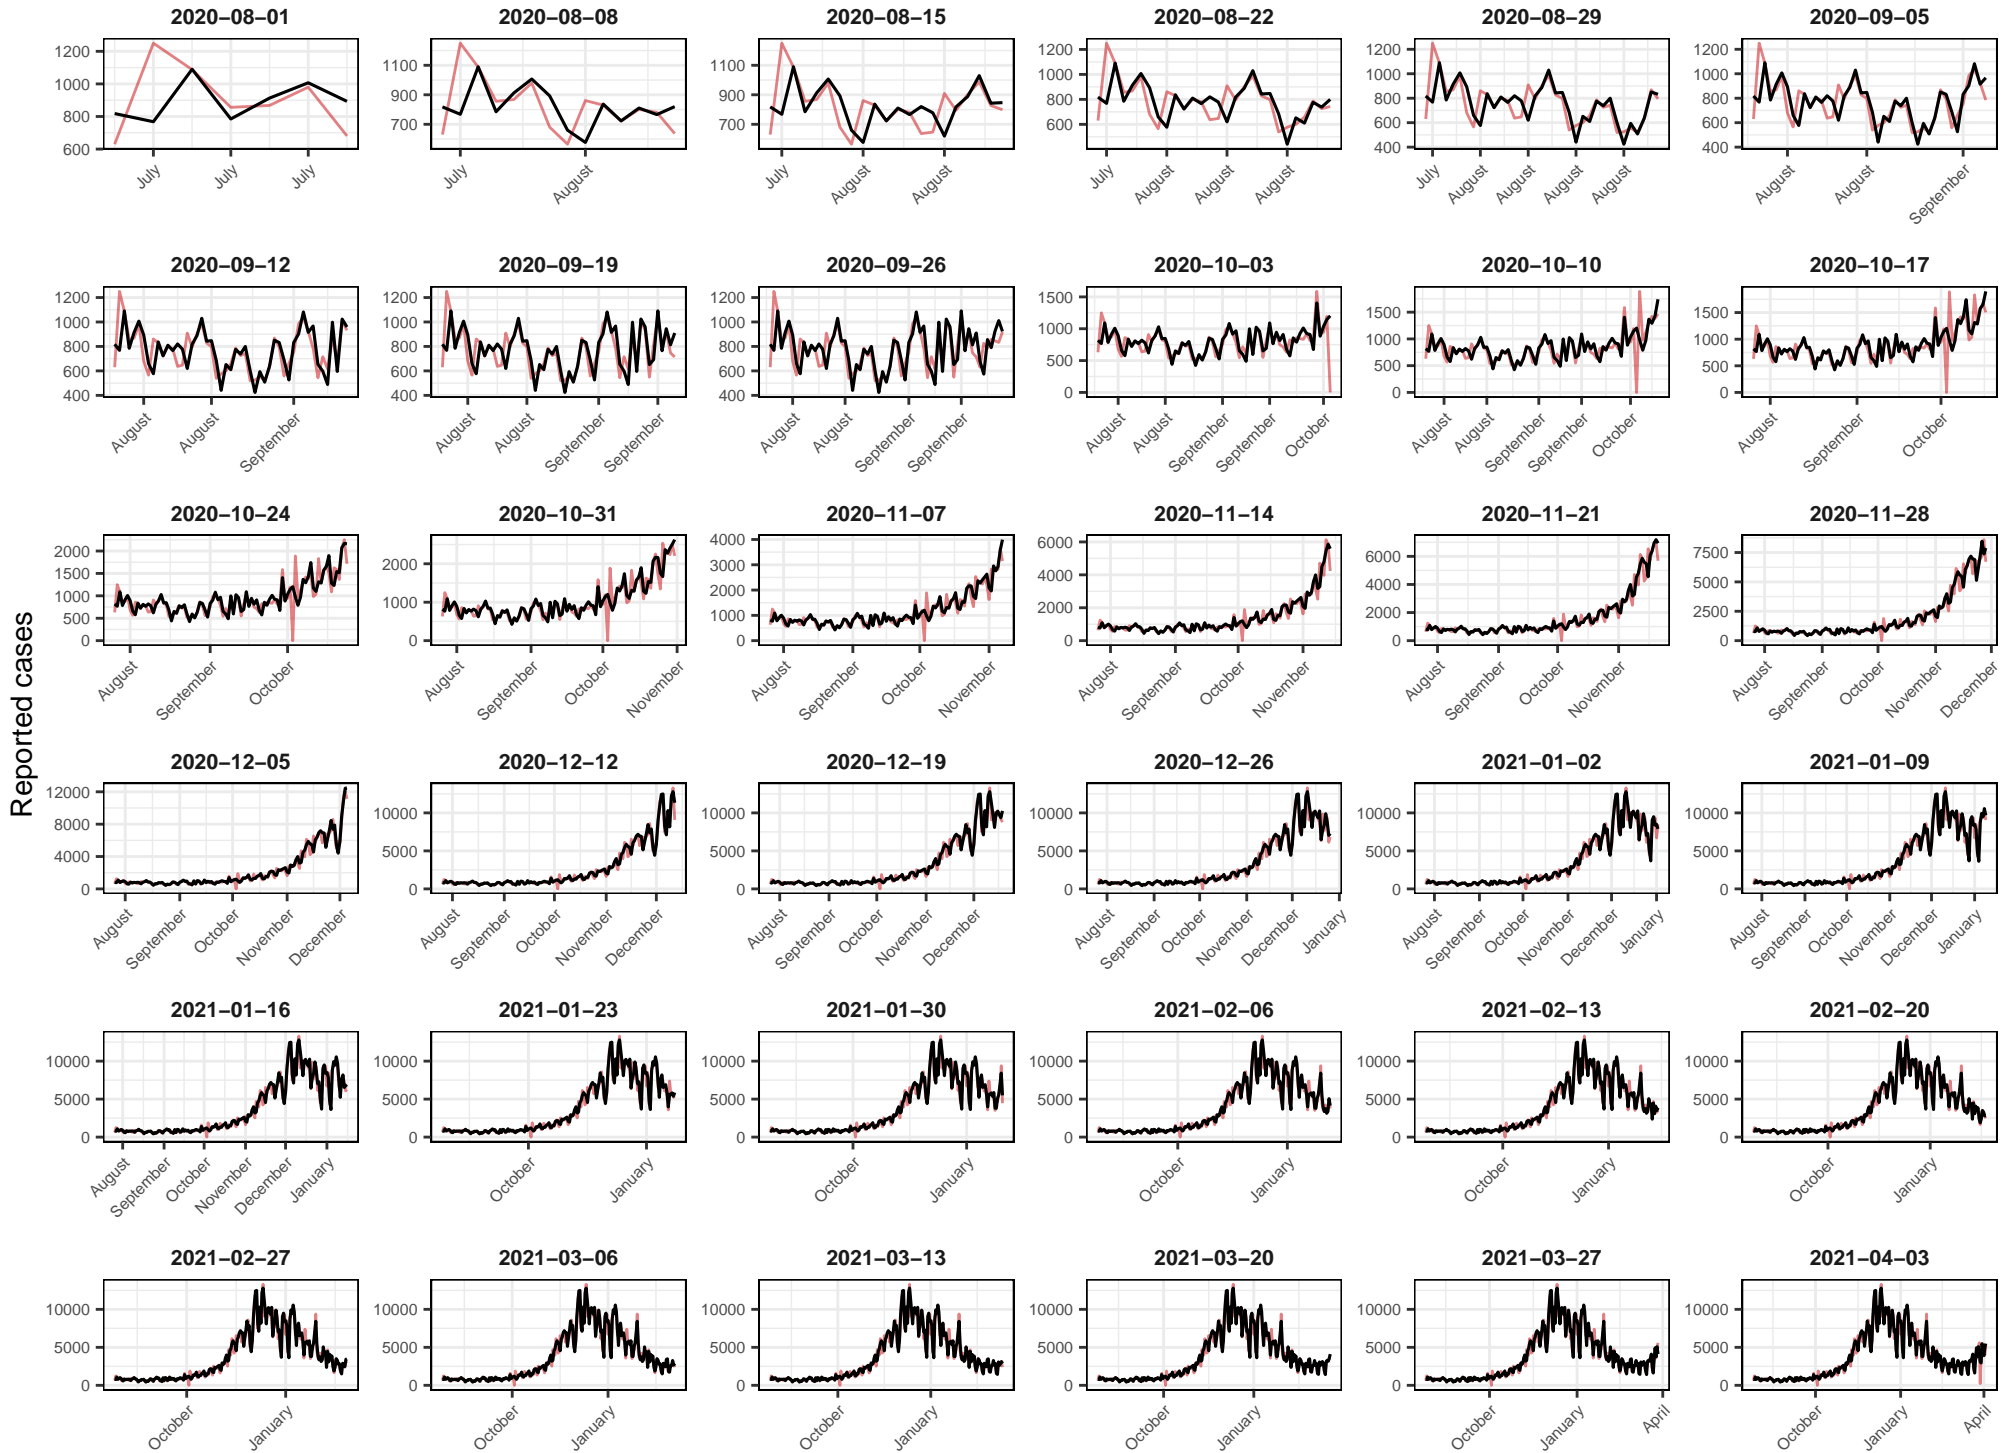

# Pennsylvania

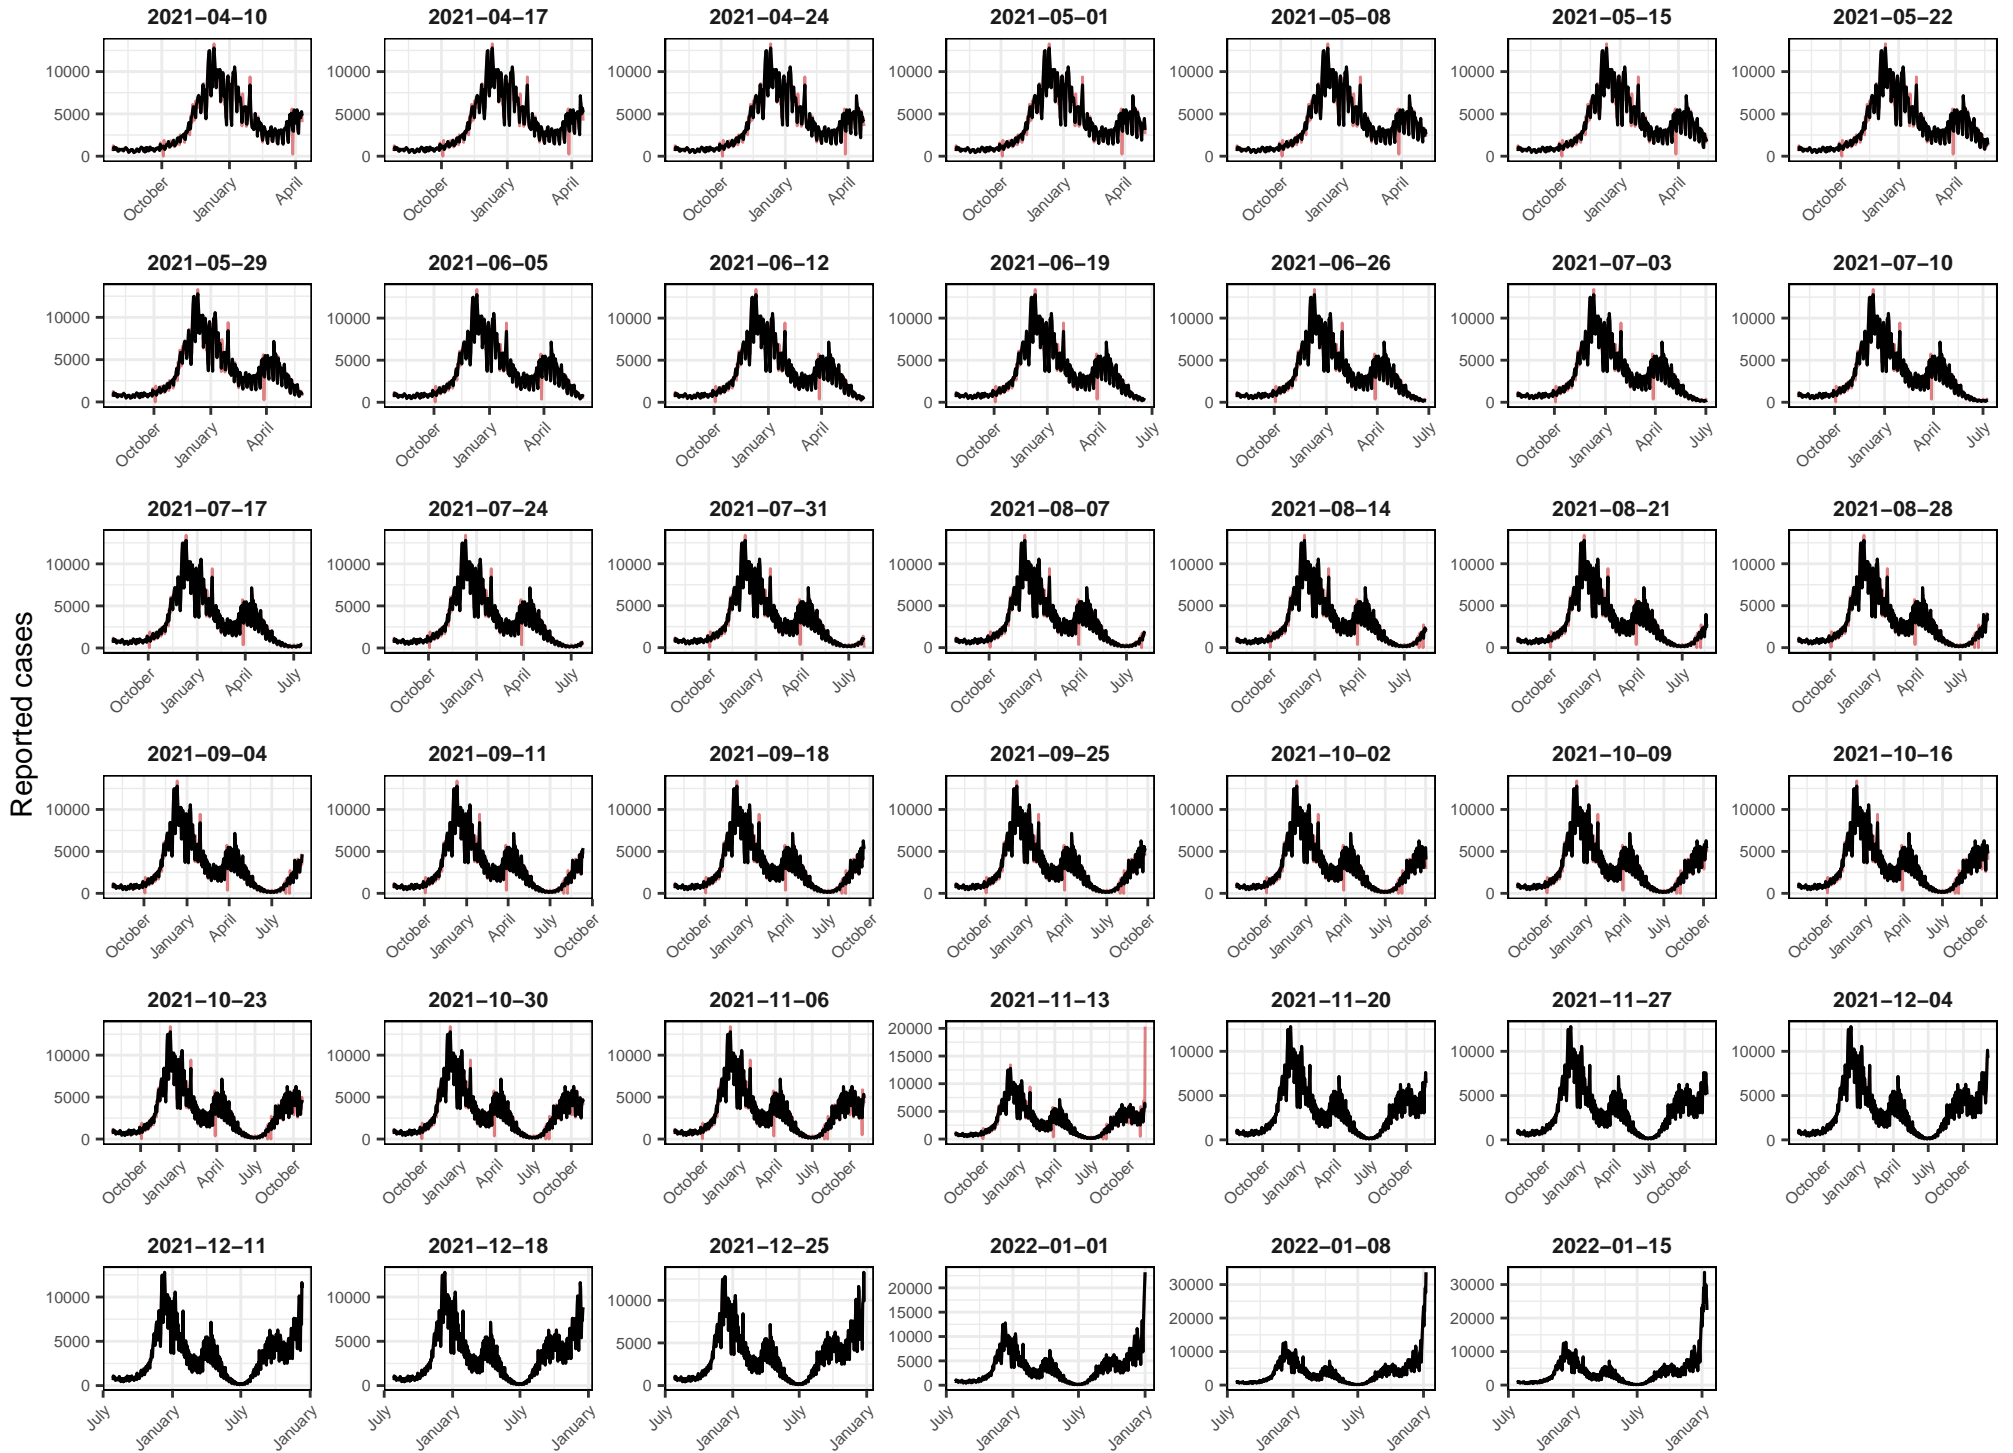

# Rhode Island

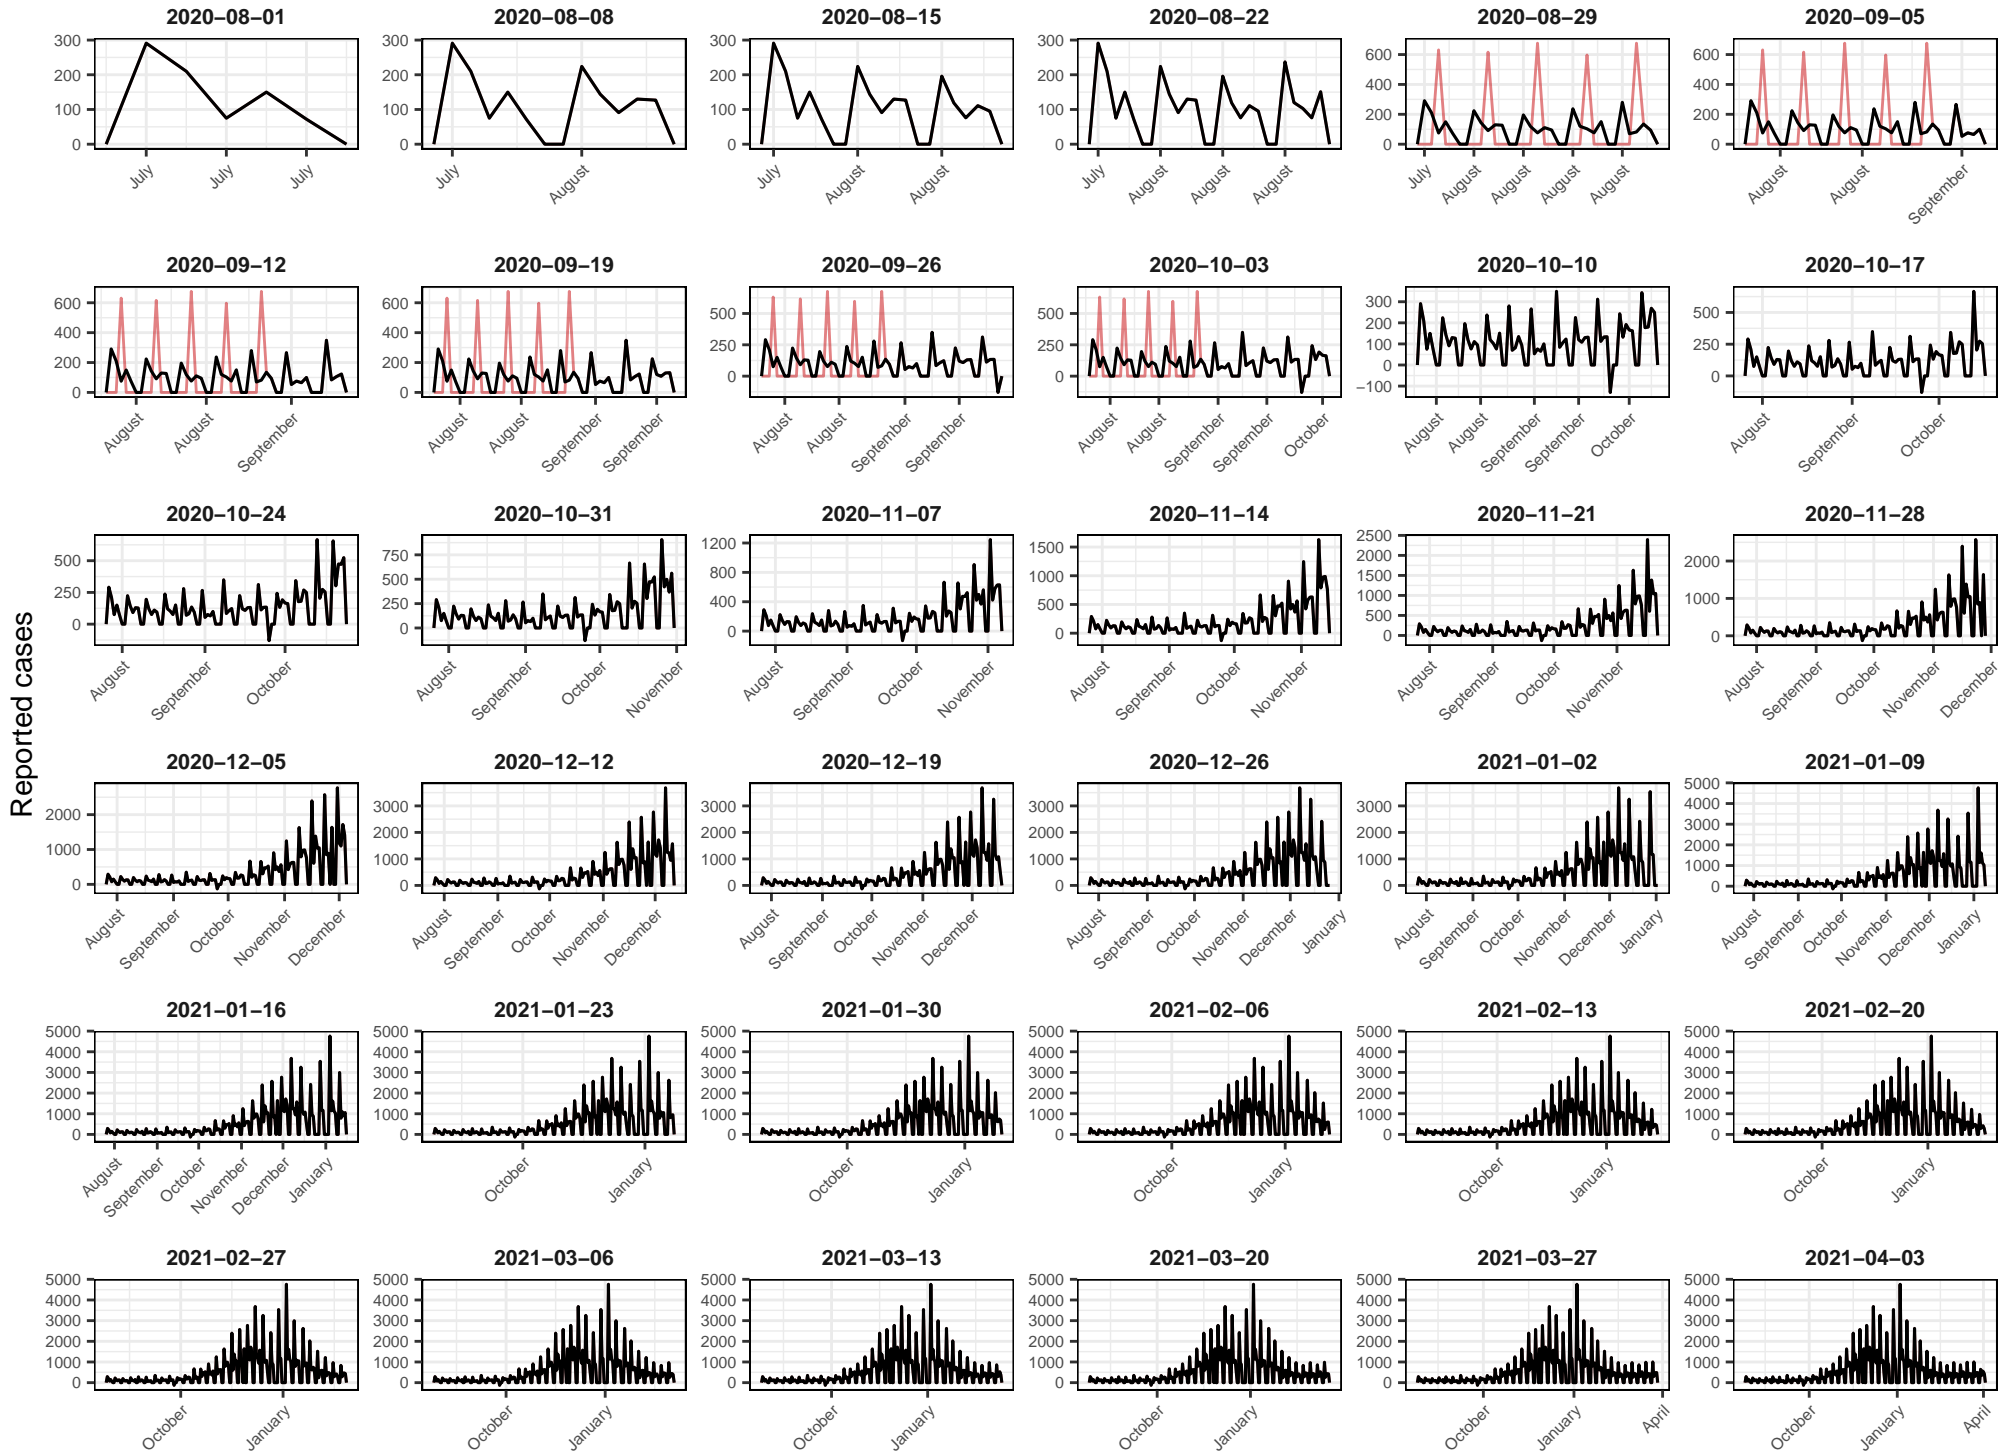

# Rhode Island

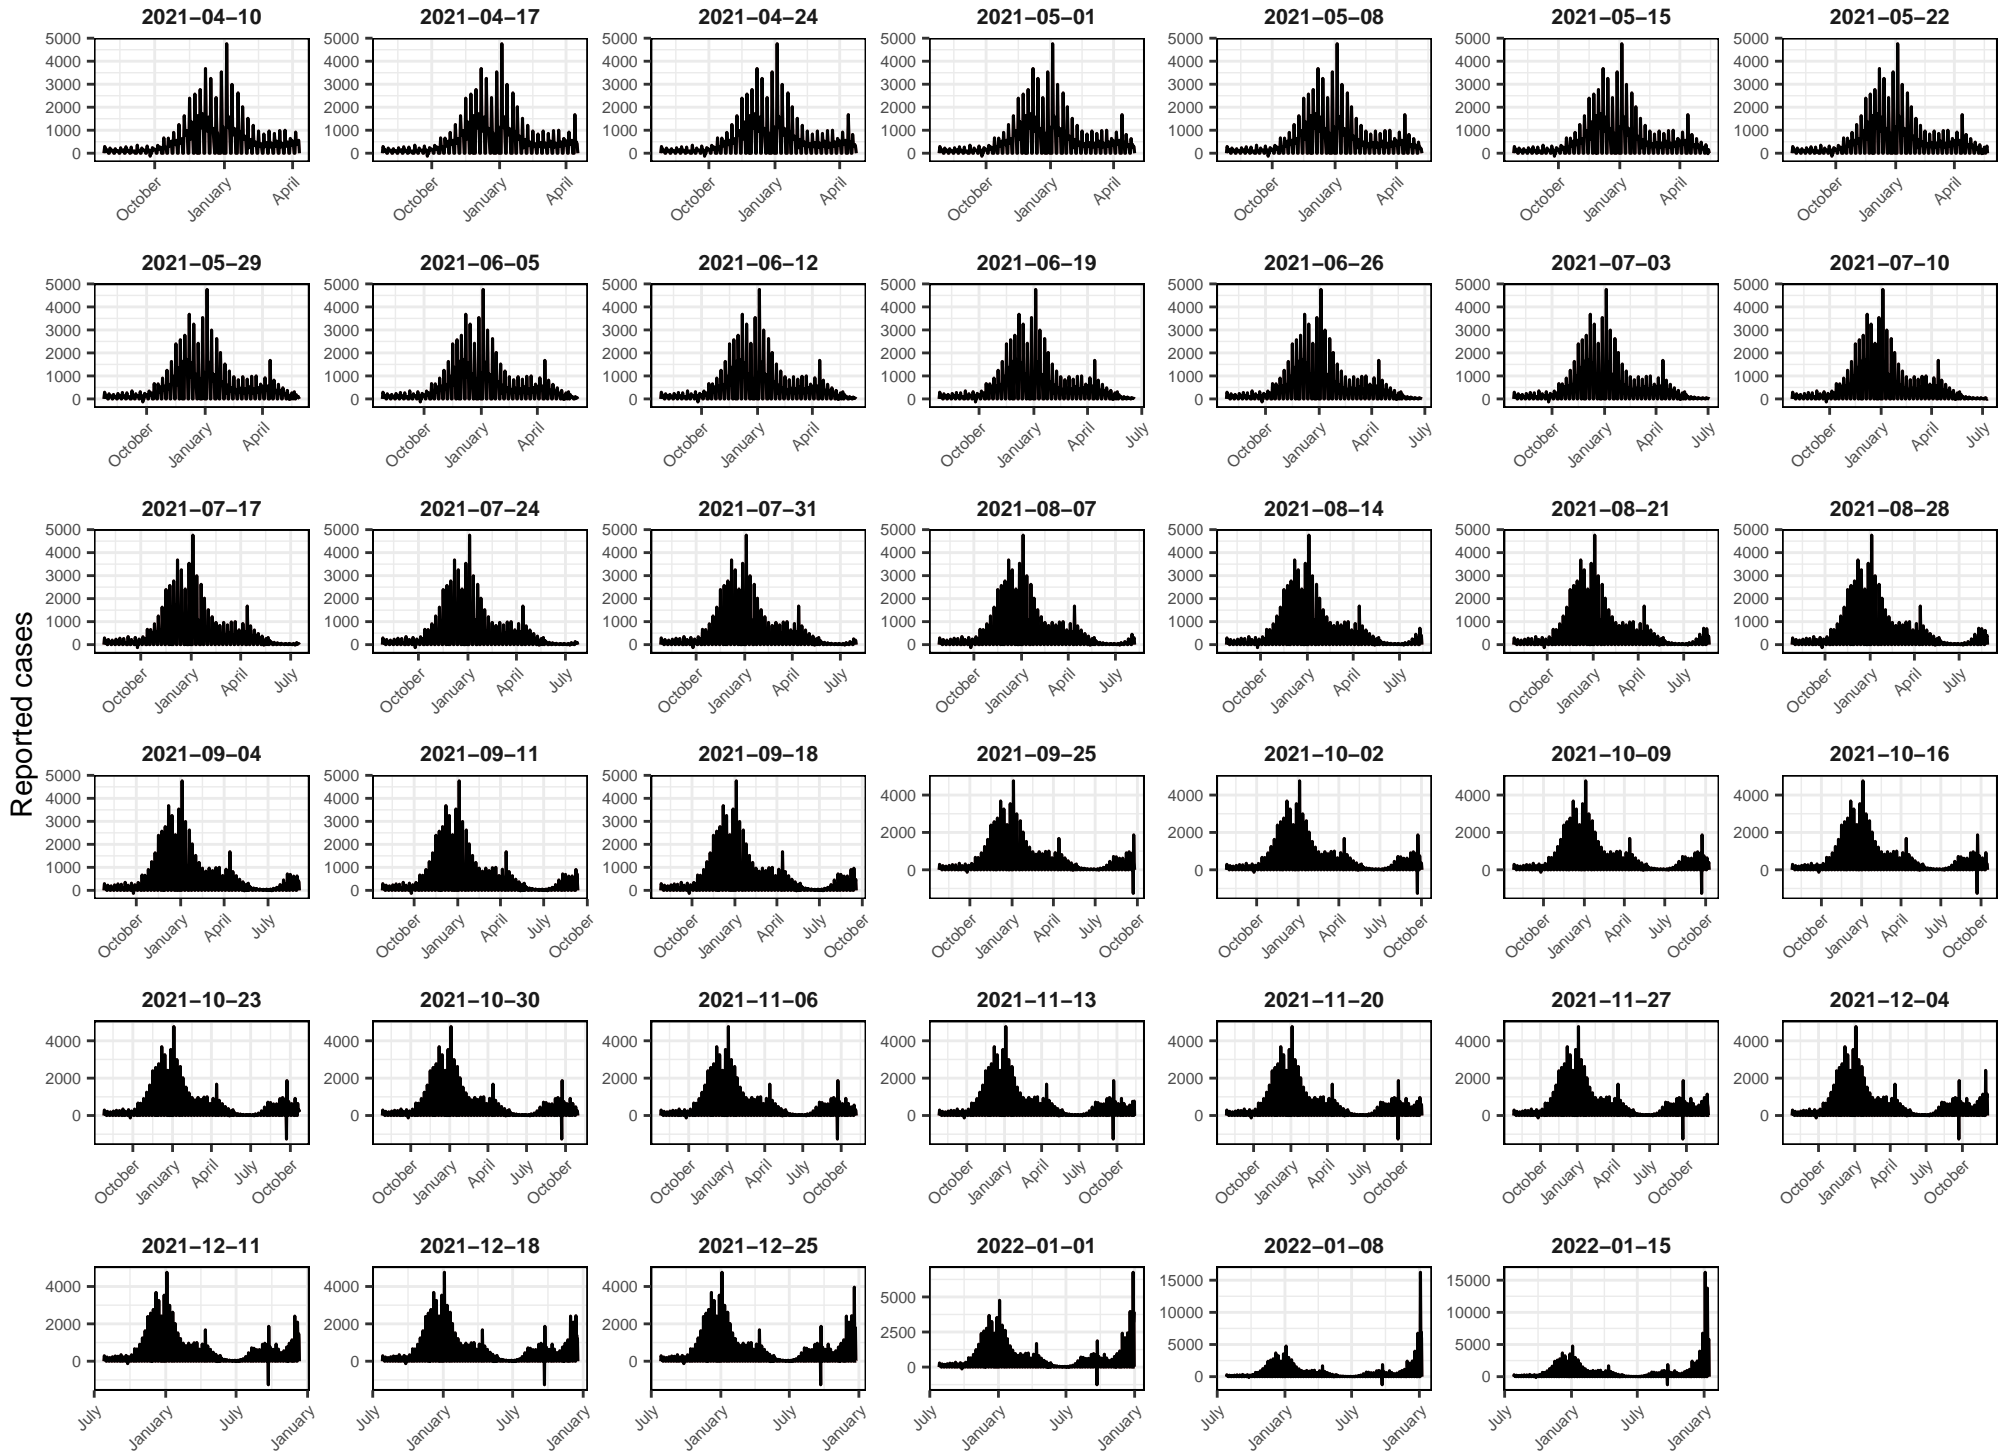



# South Carolina

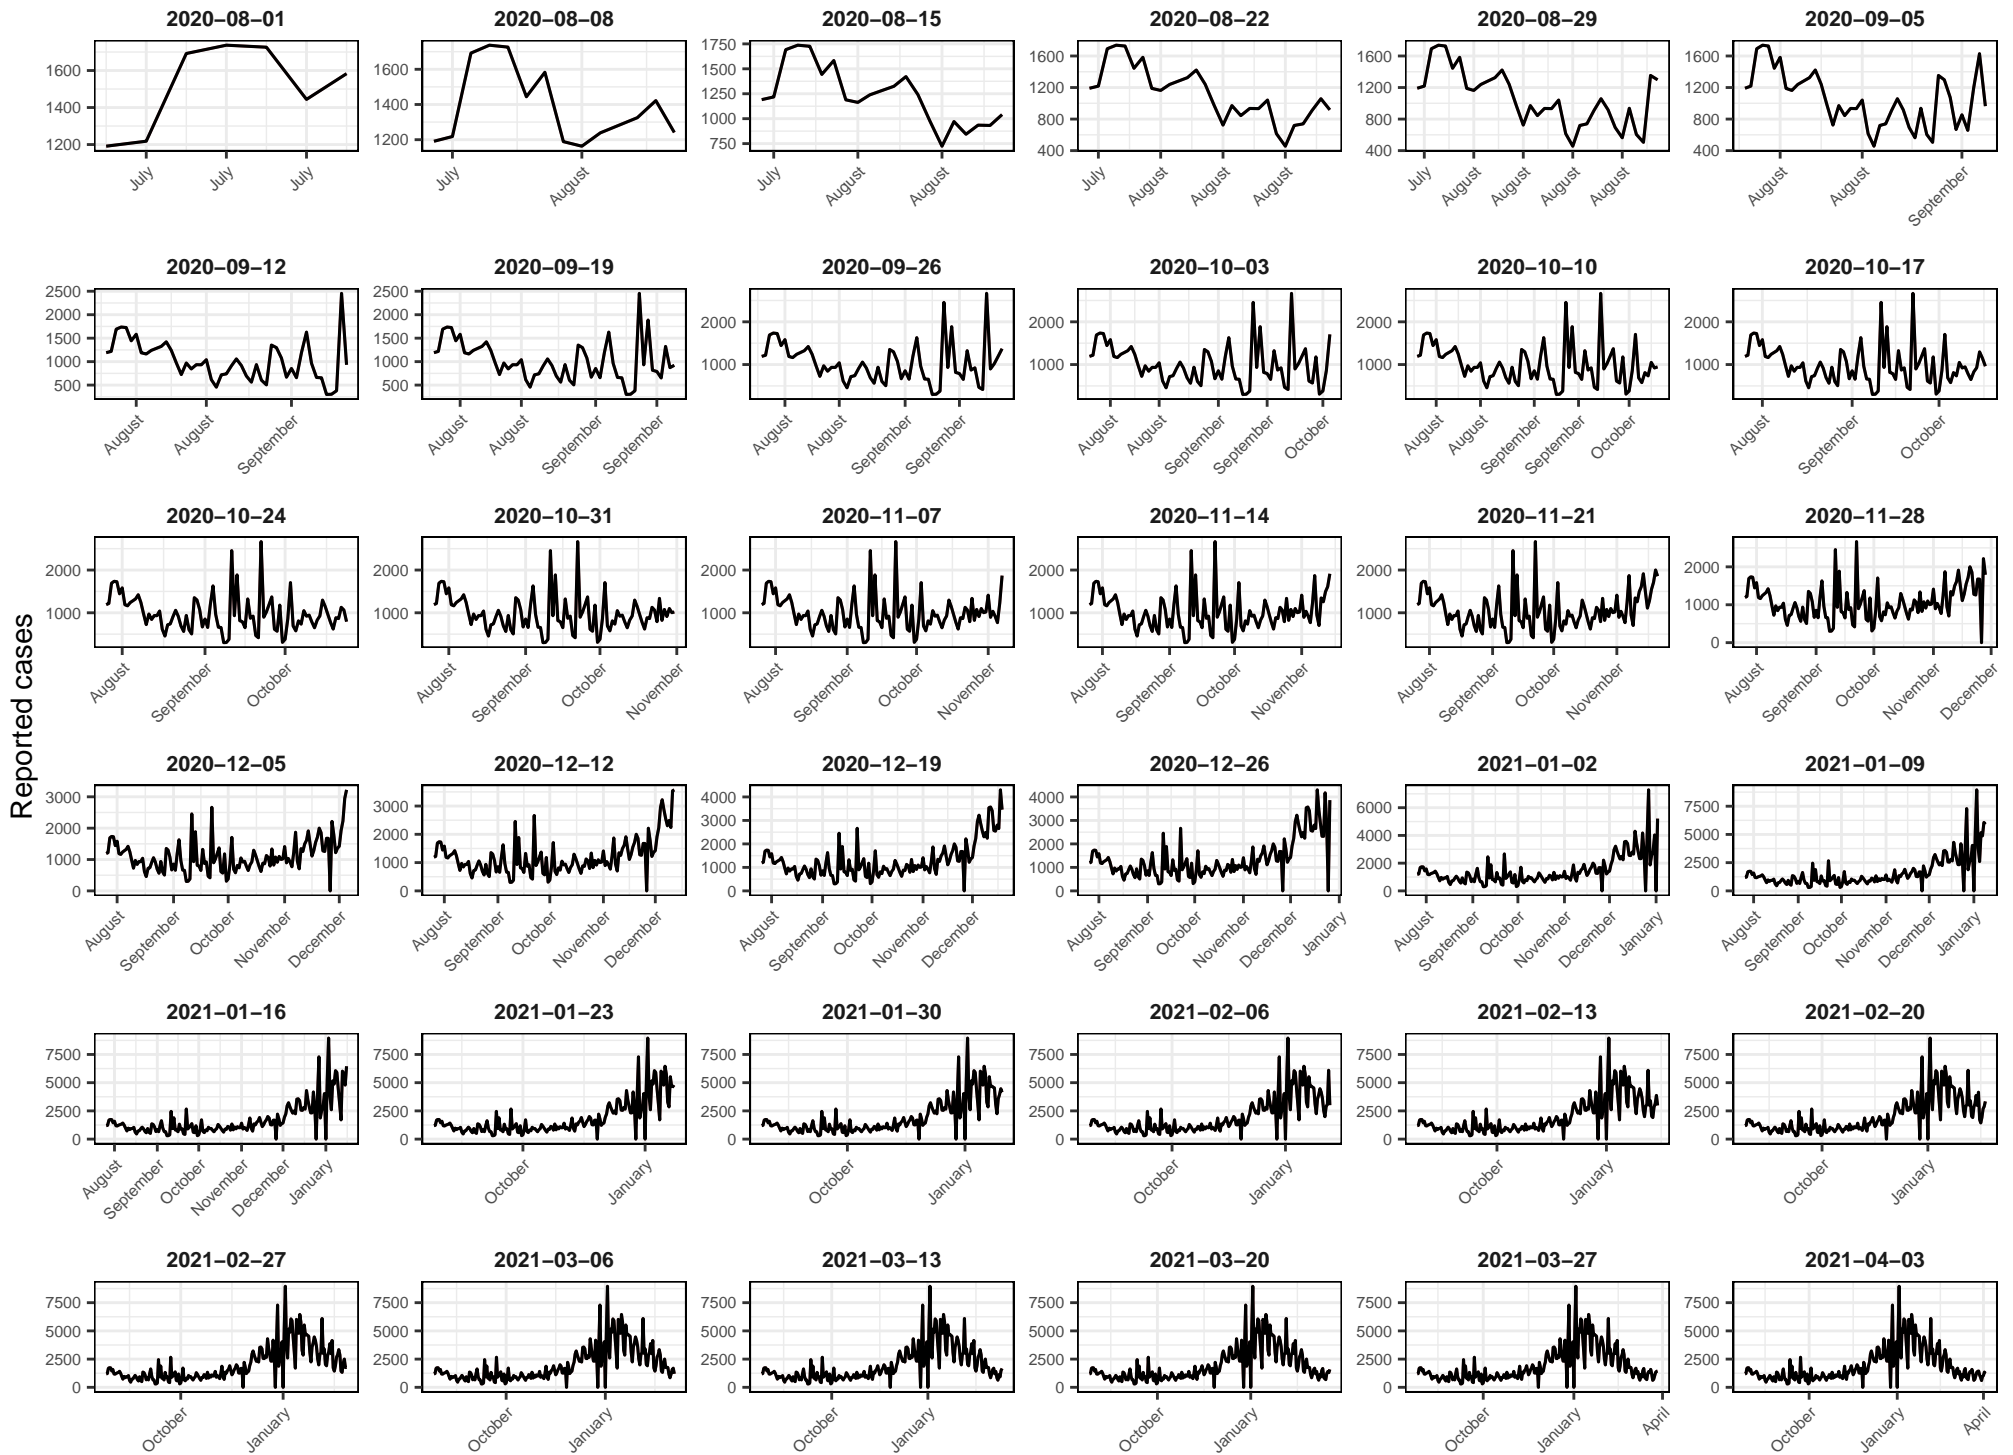

# South Carolina

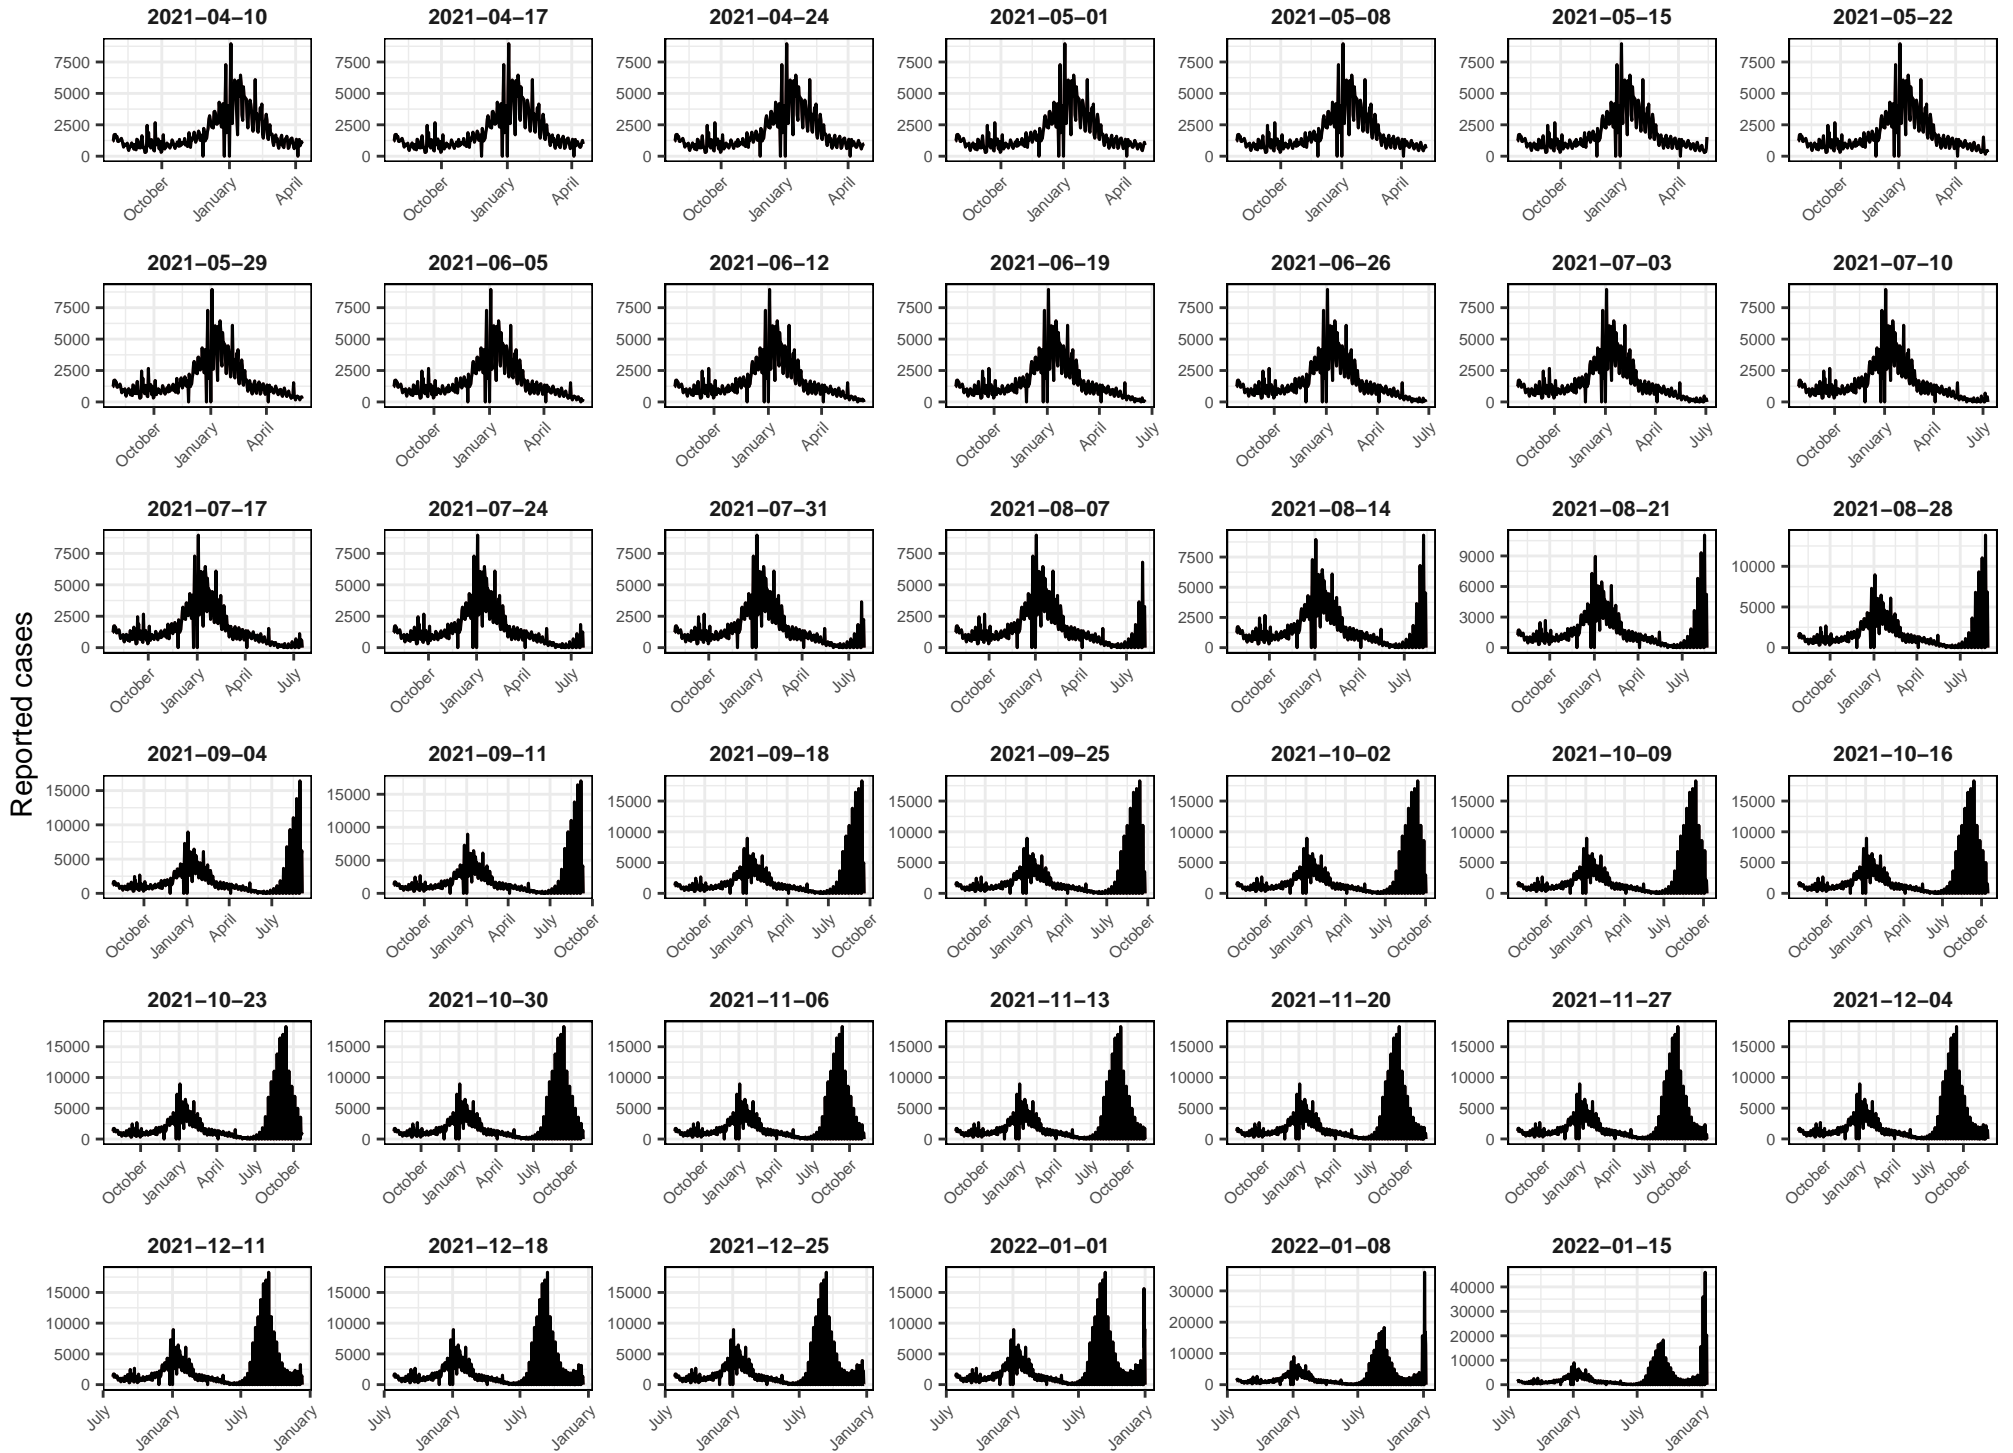

# South Dakota

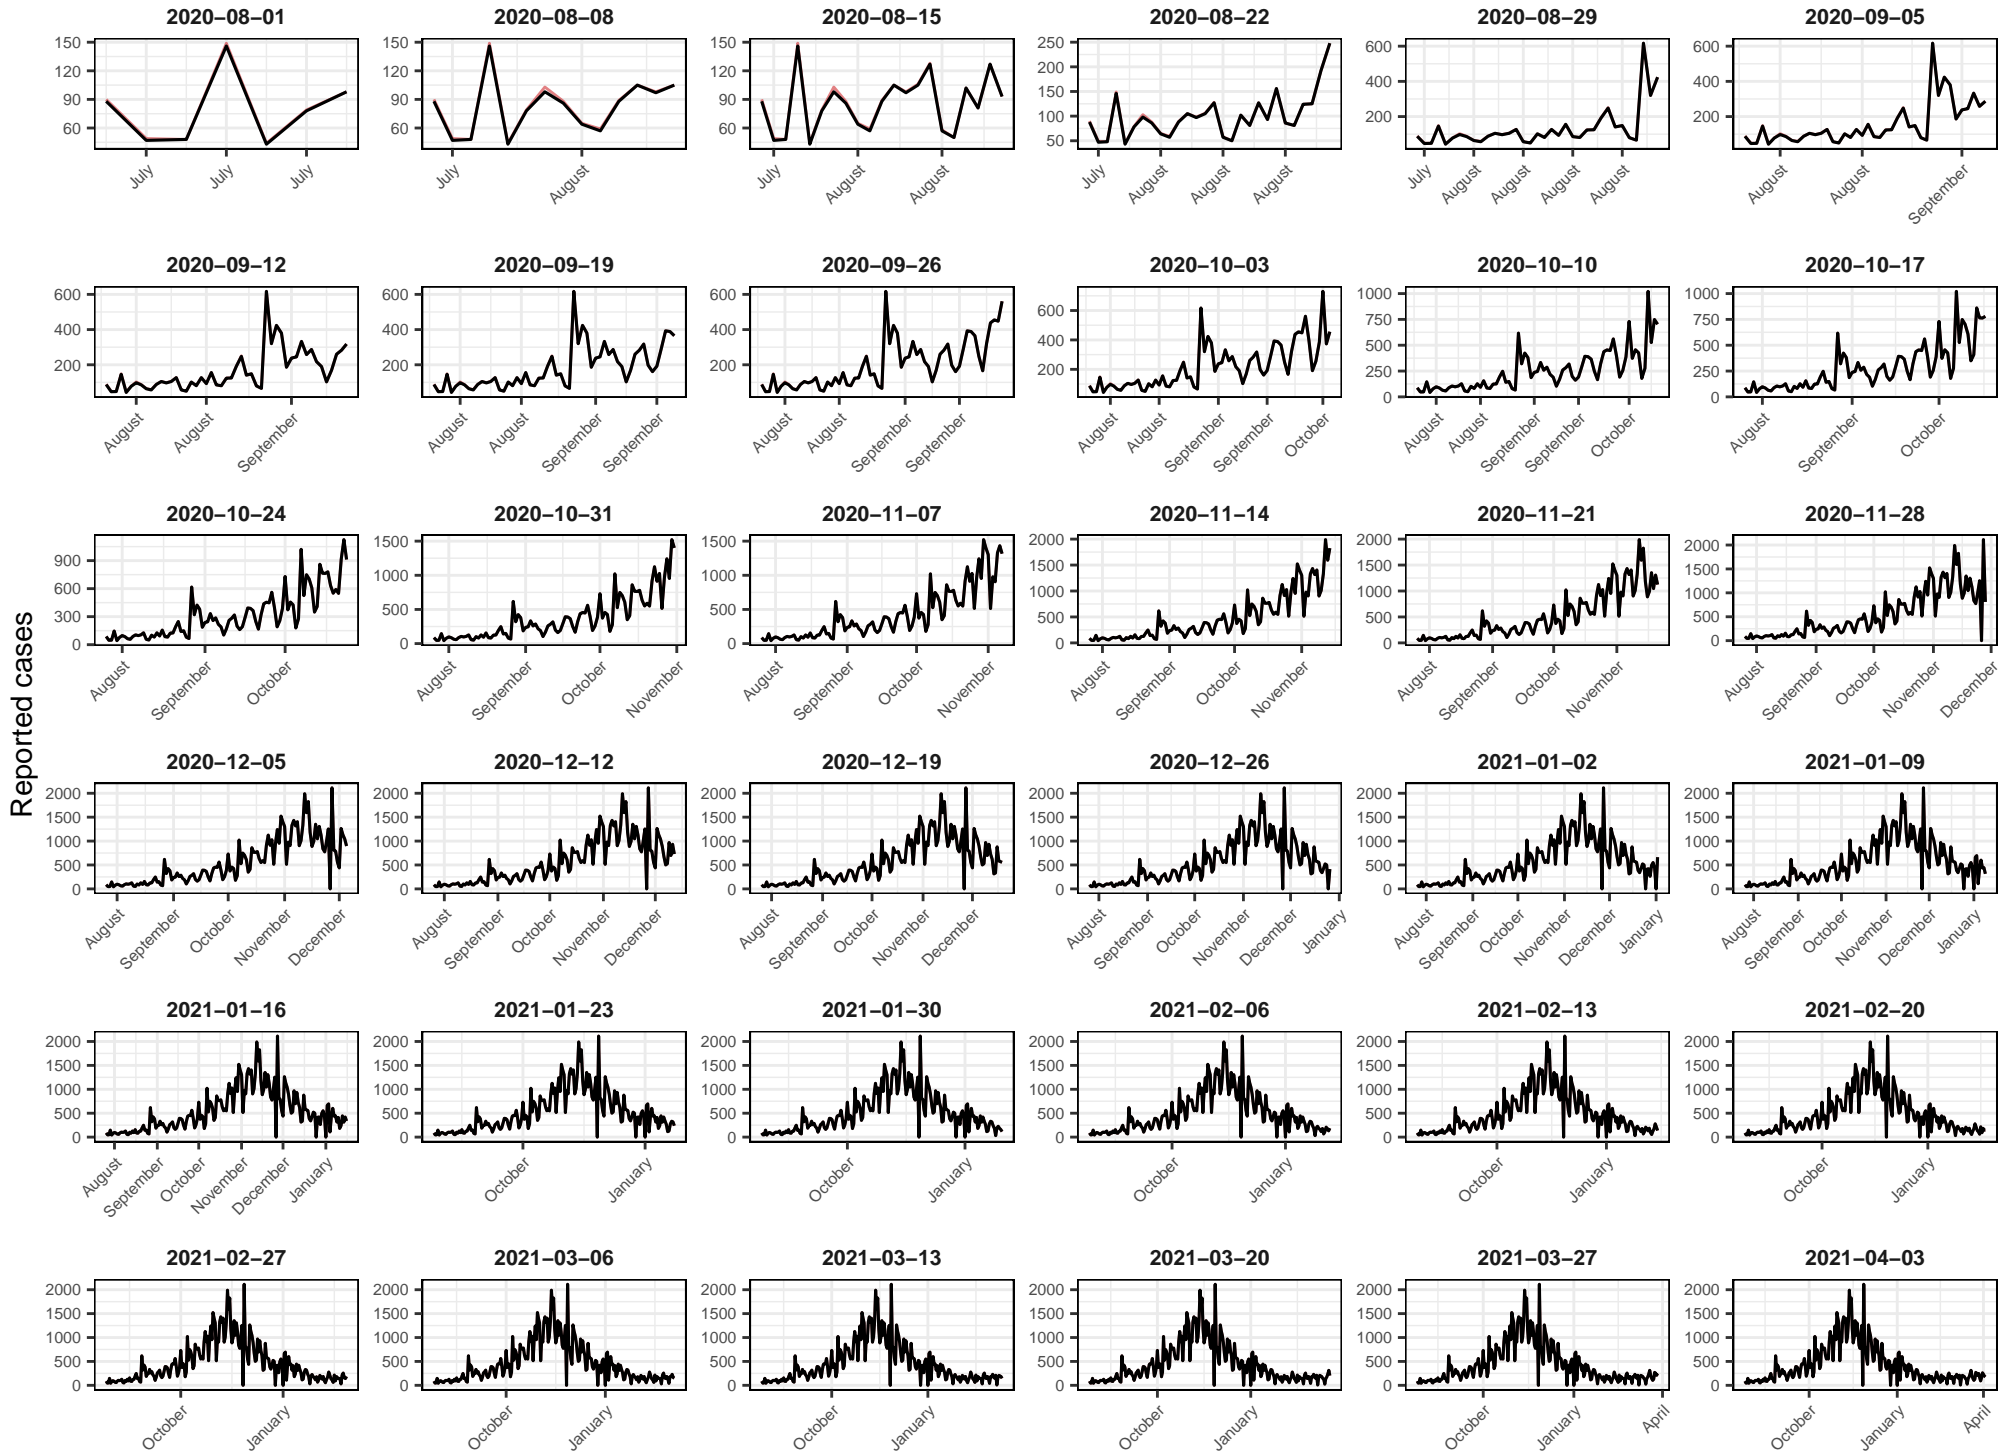

# South Dakota

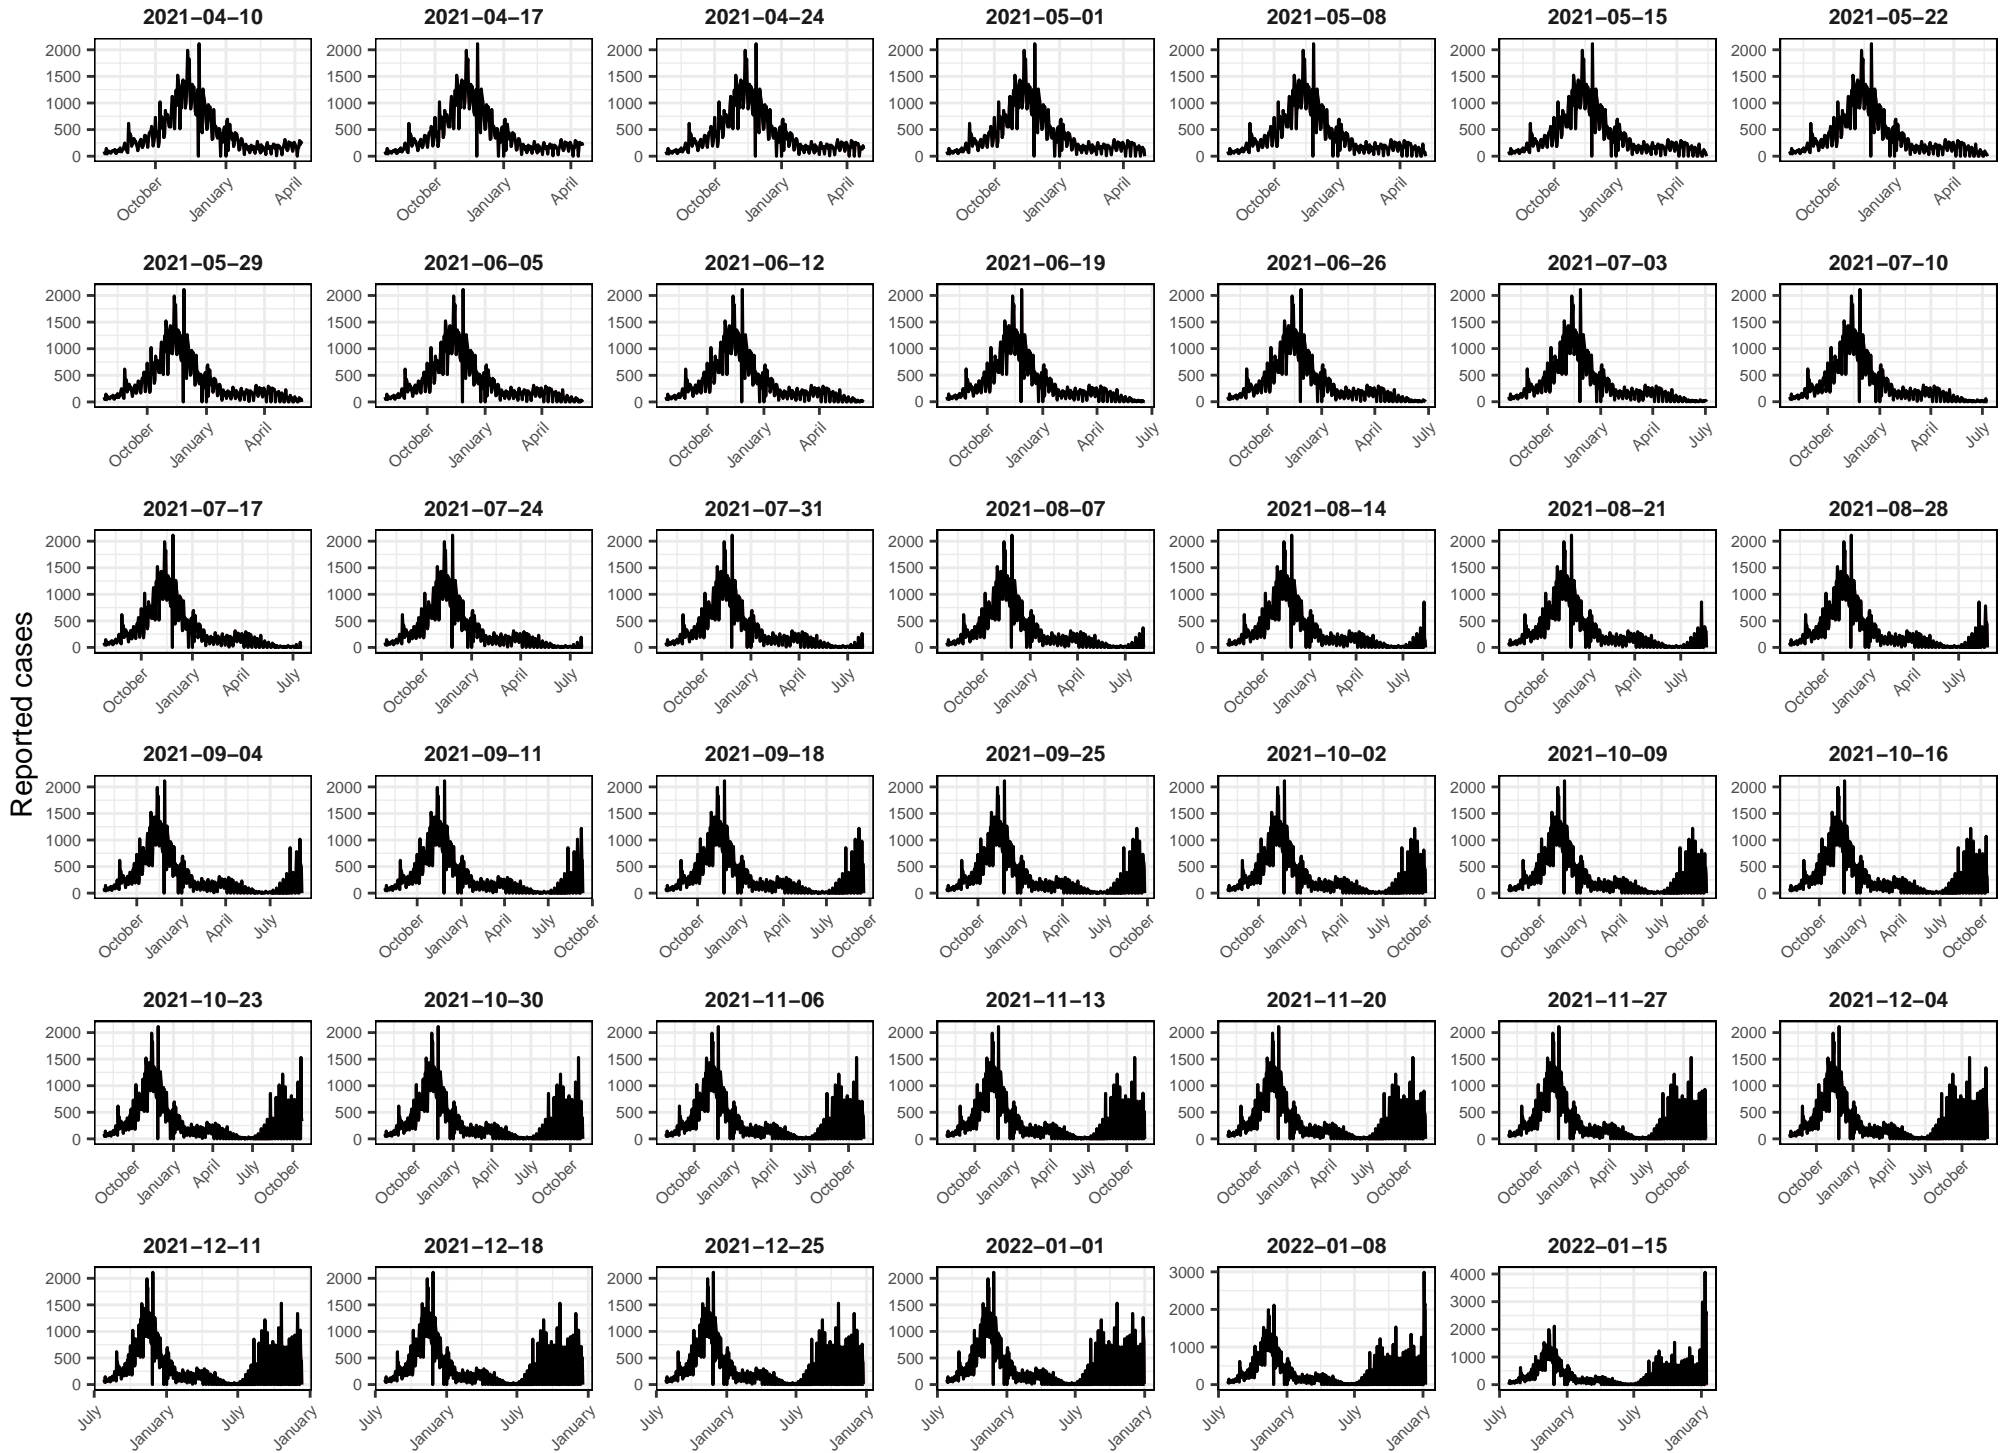

# Tennessee

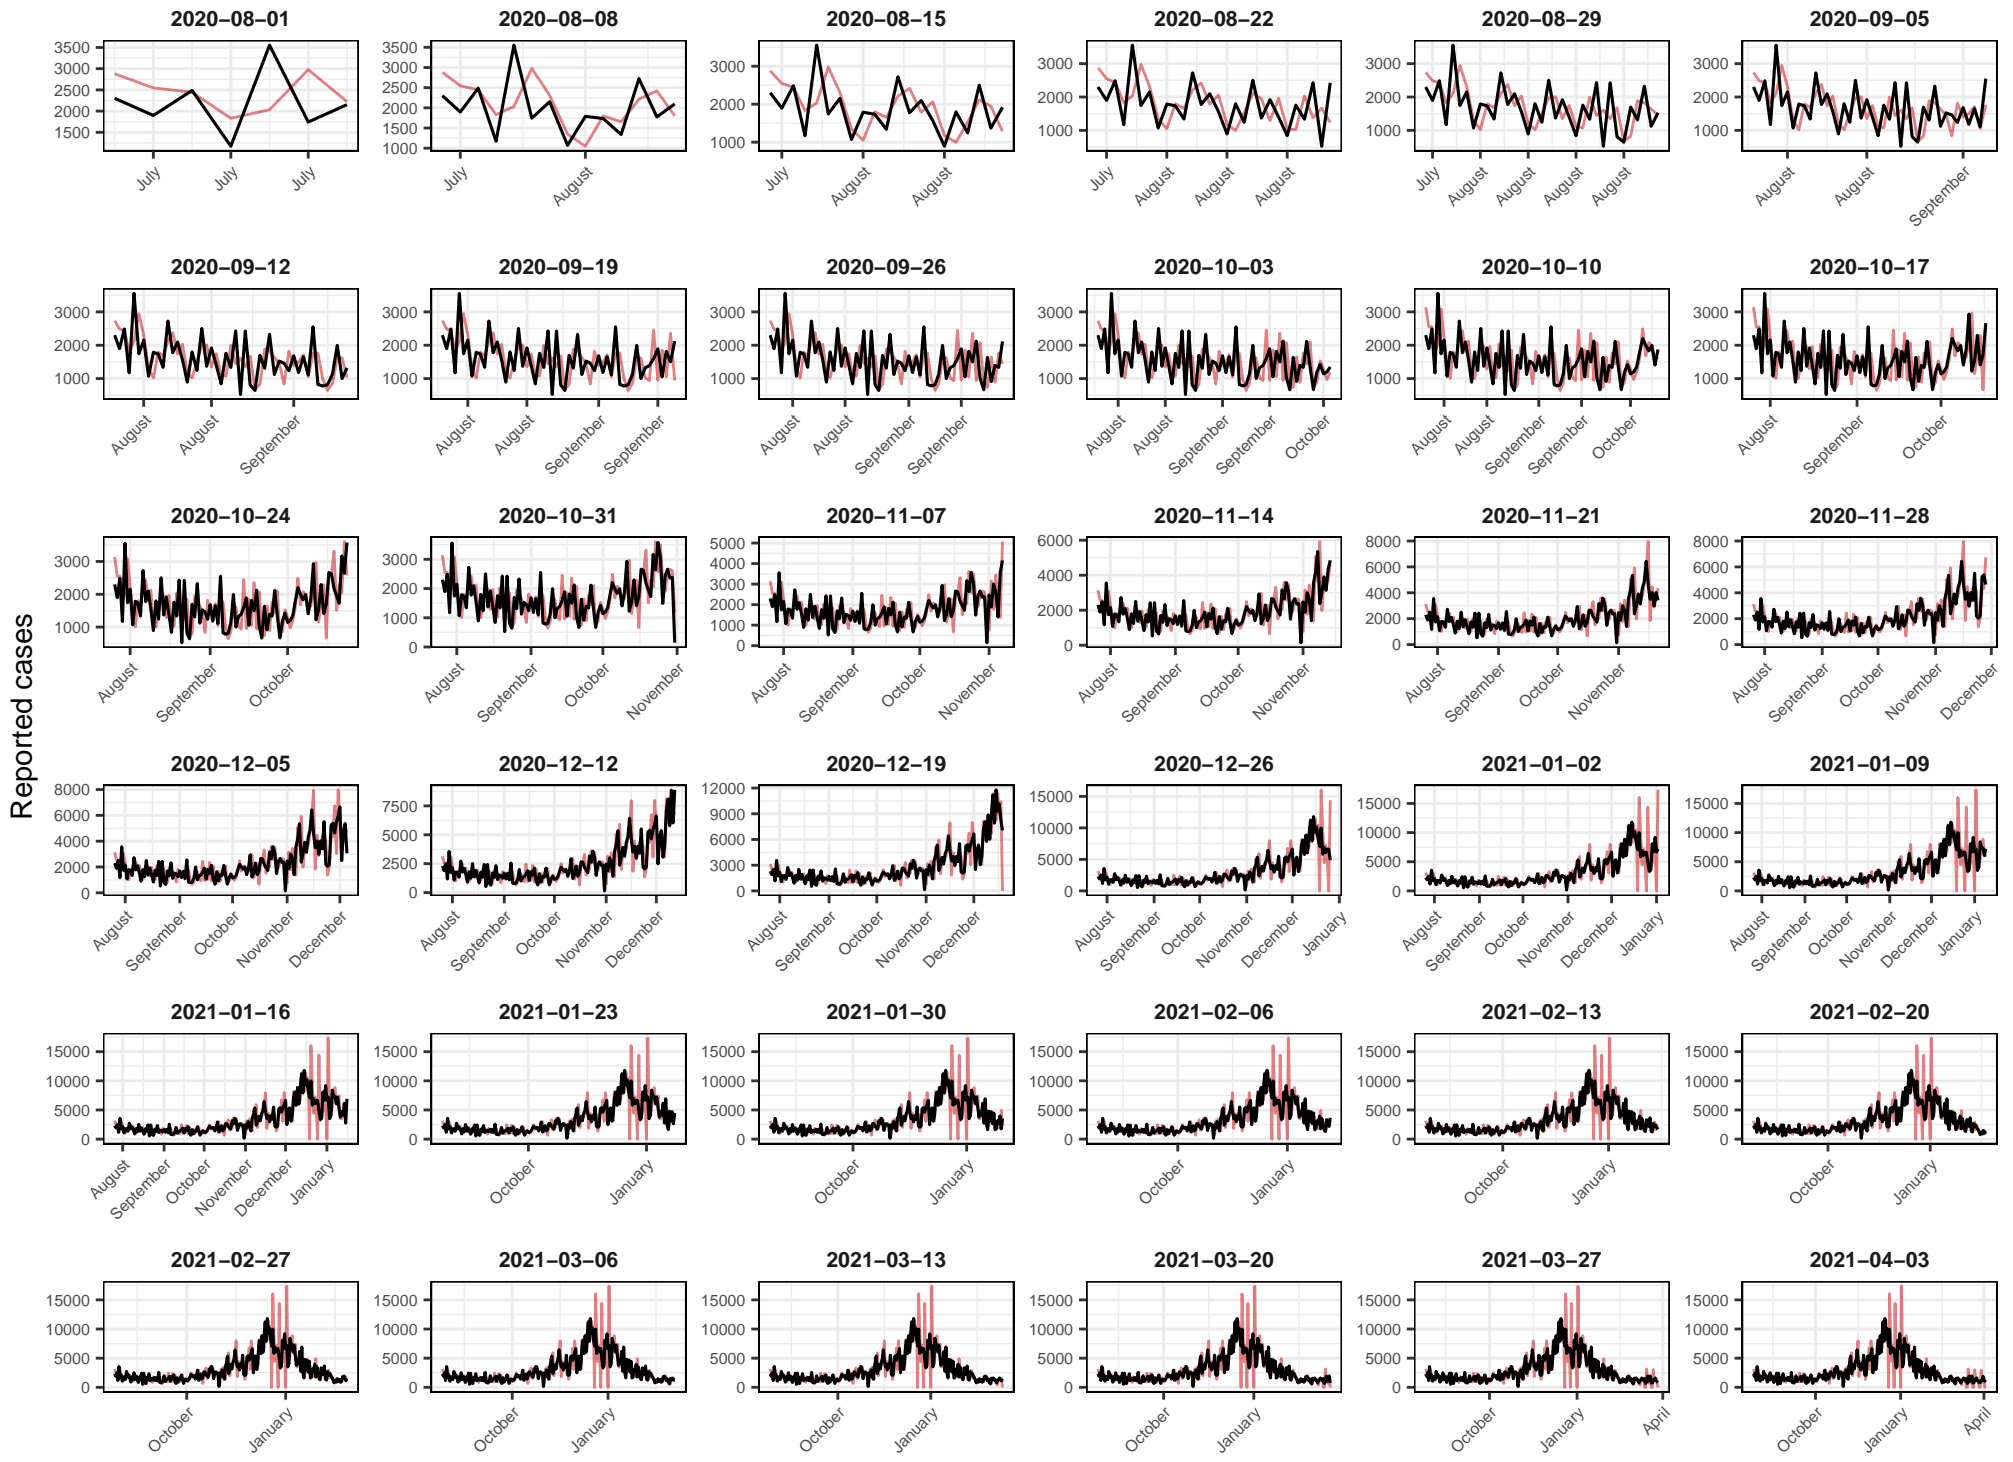

# Tennessee

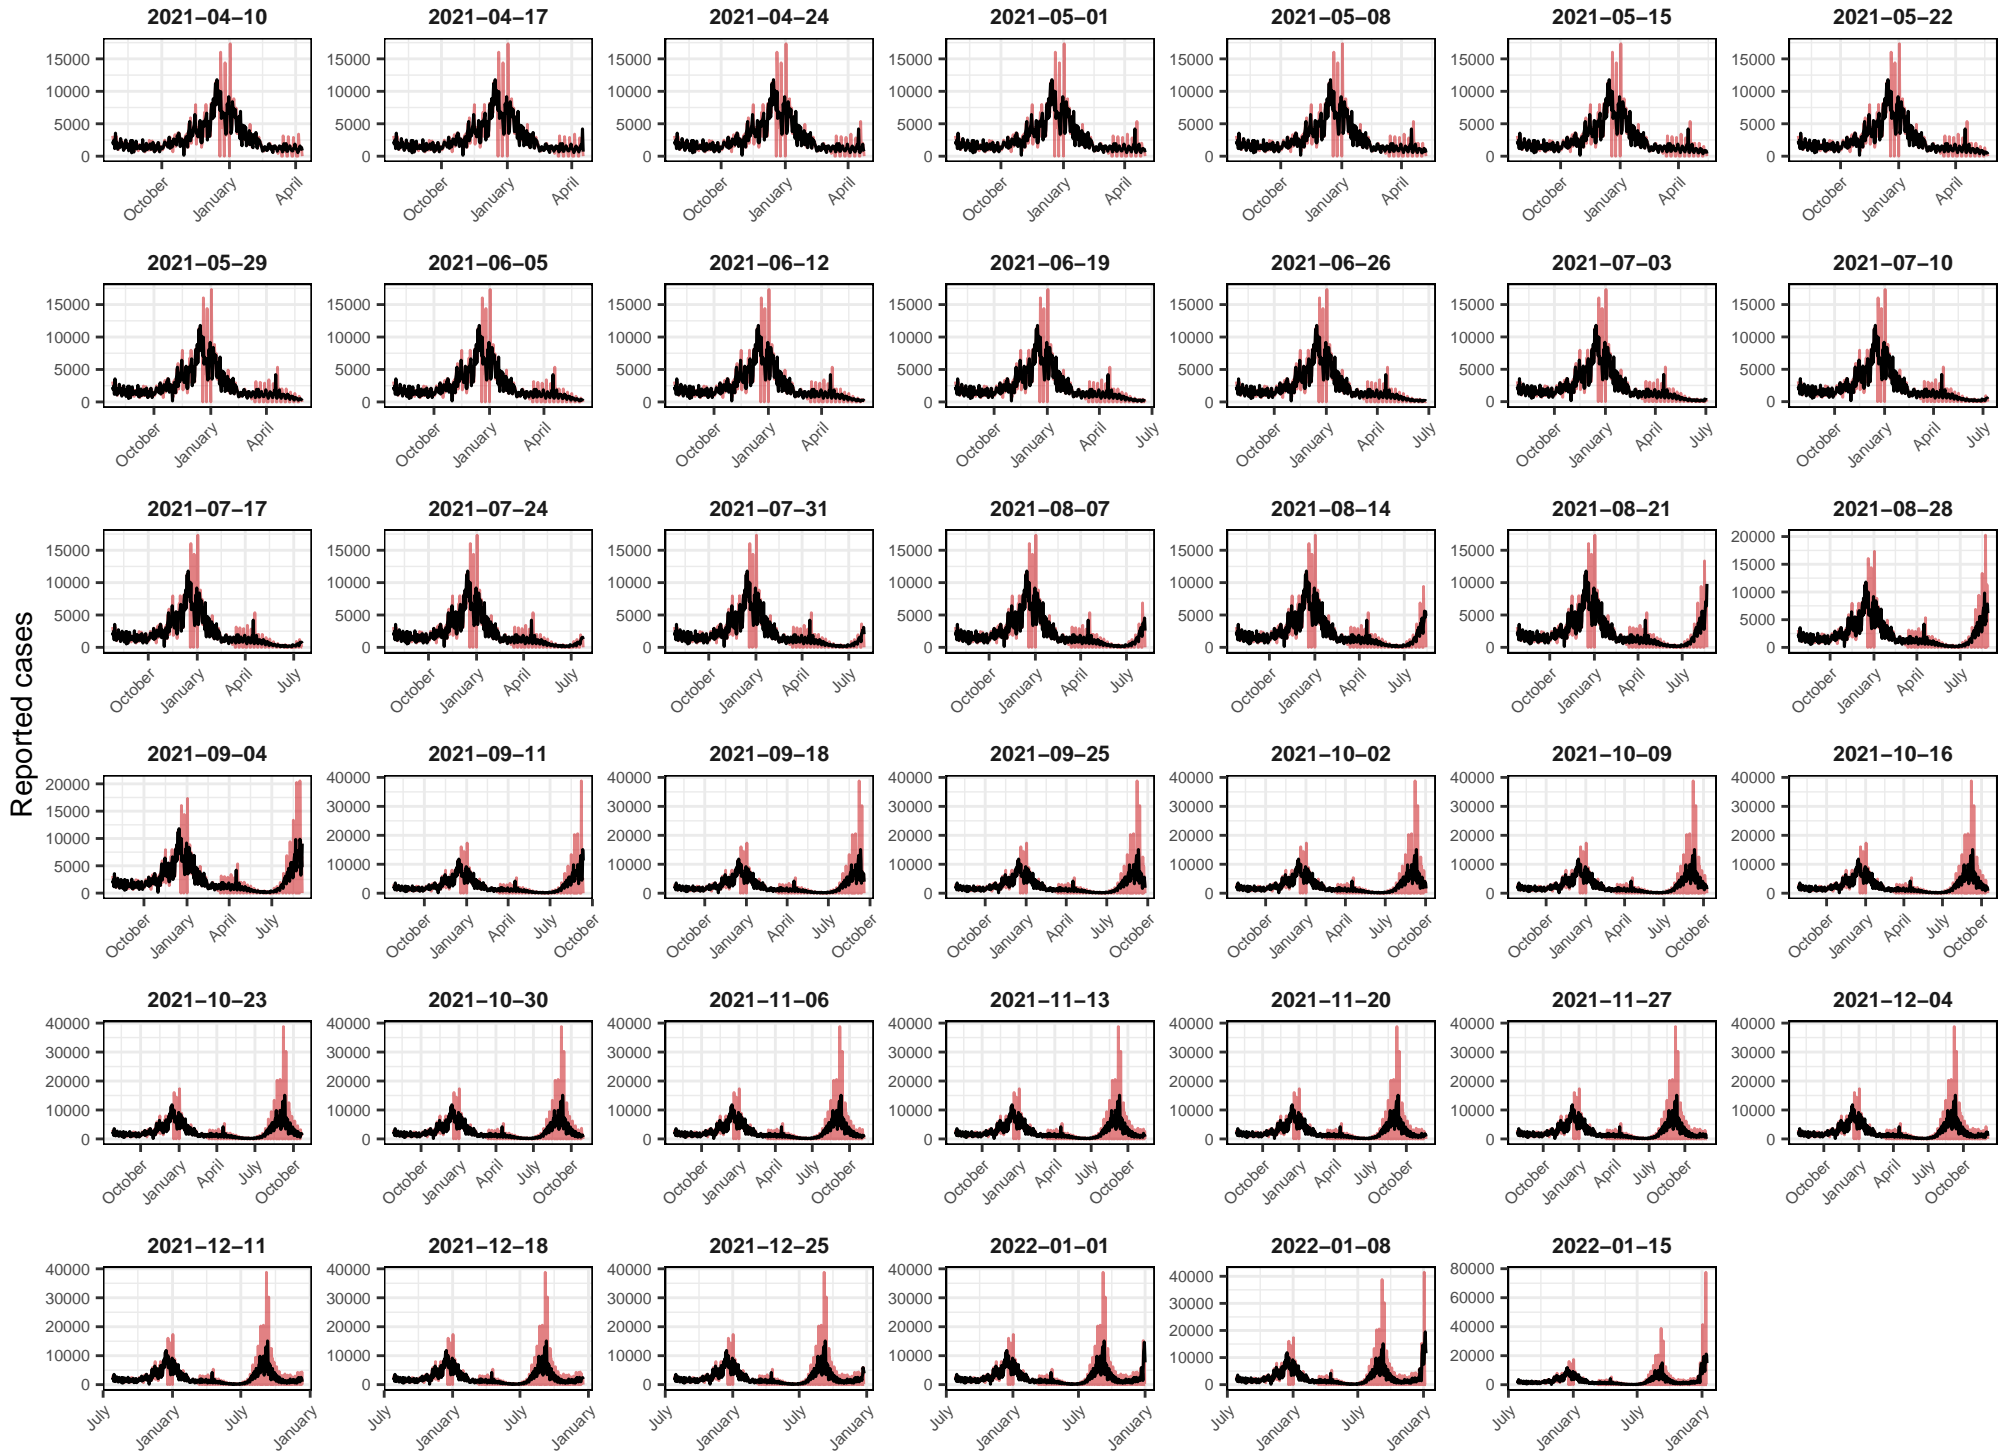

# Texas

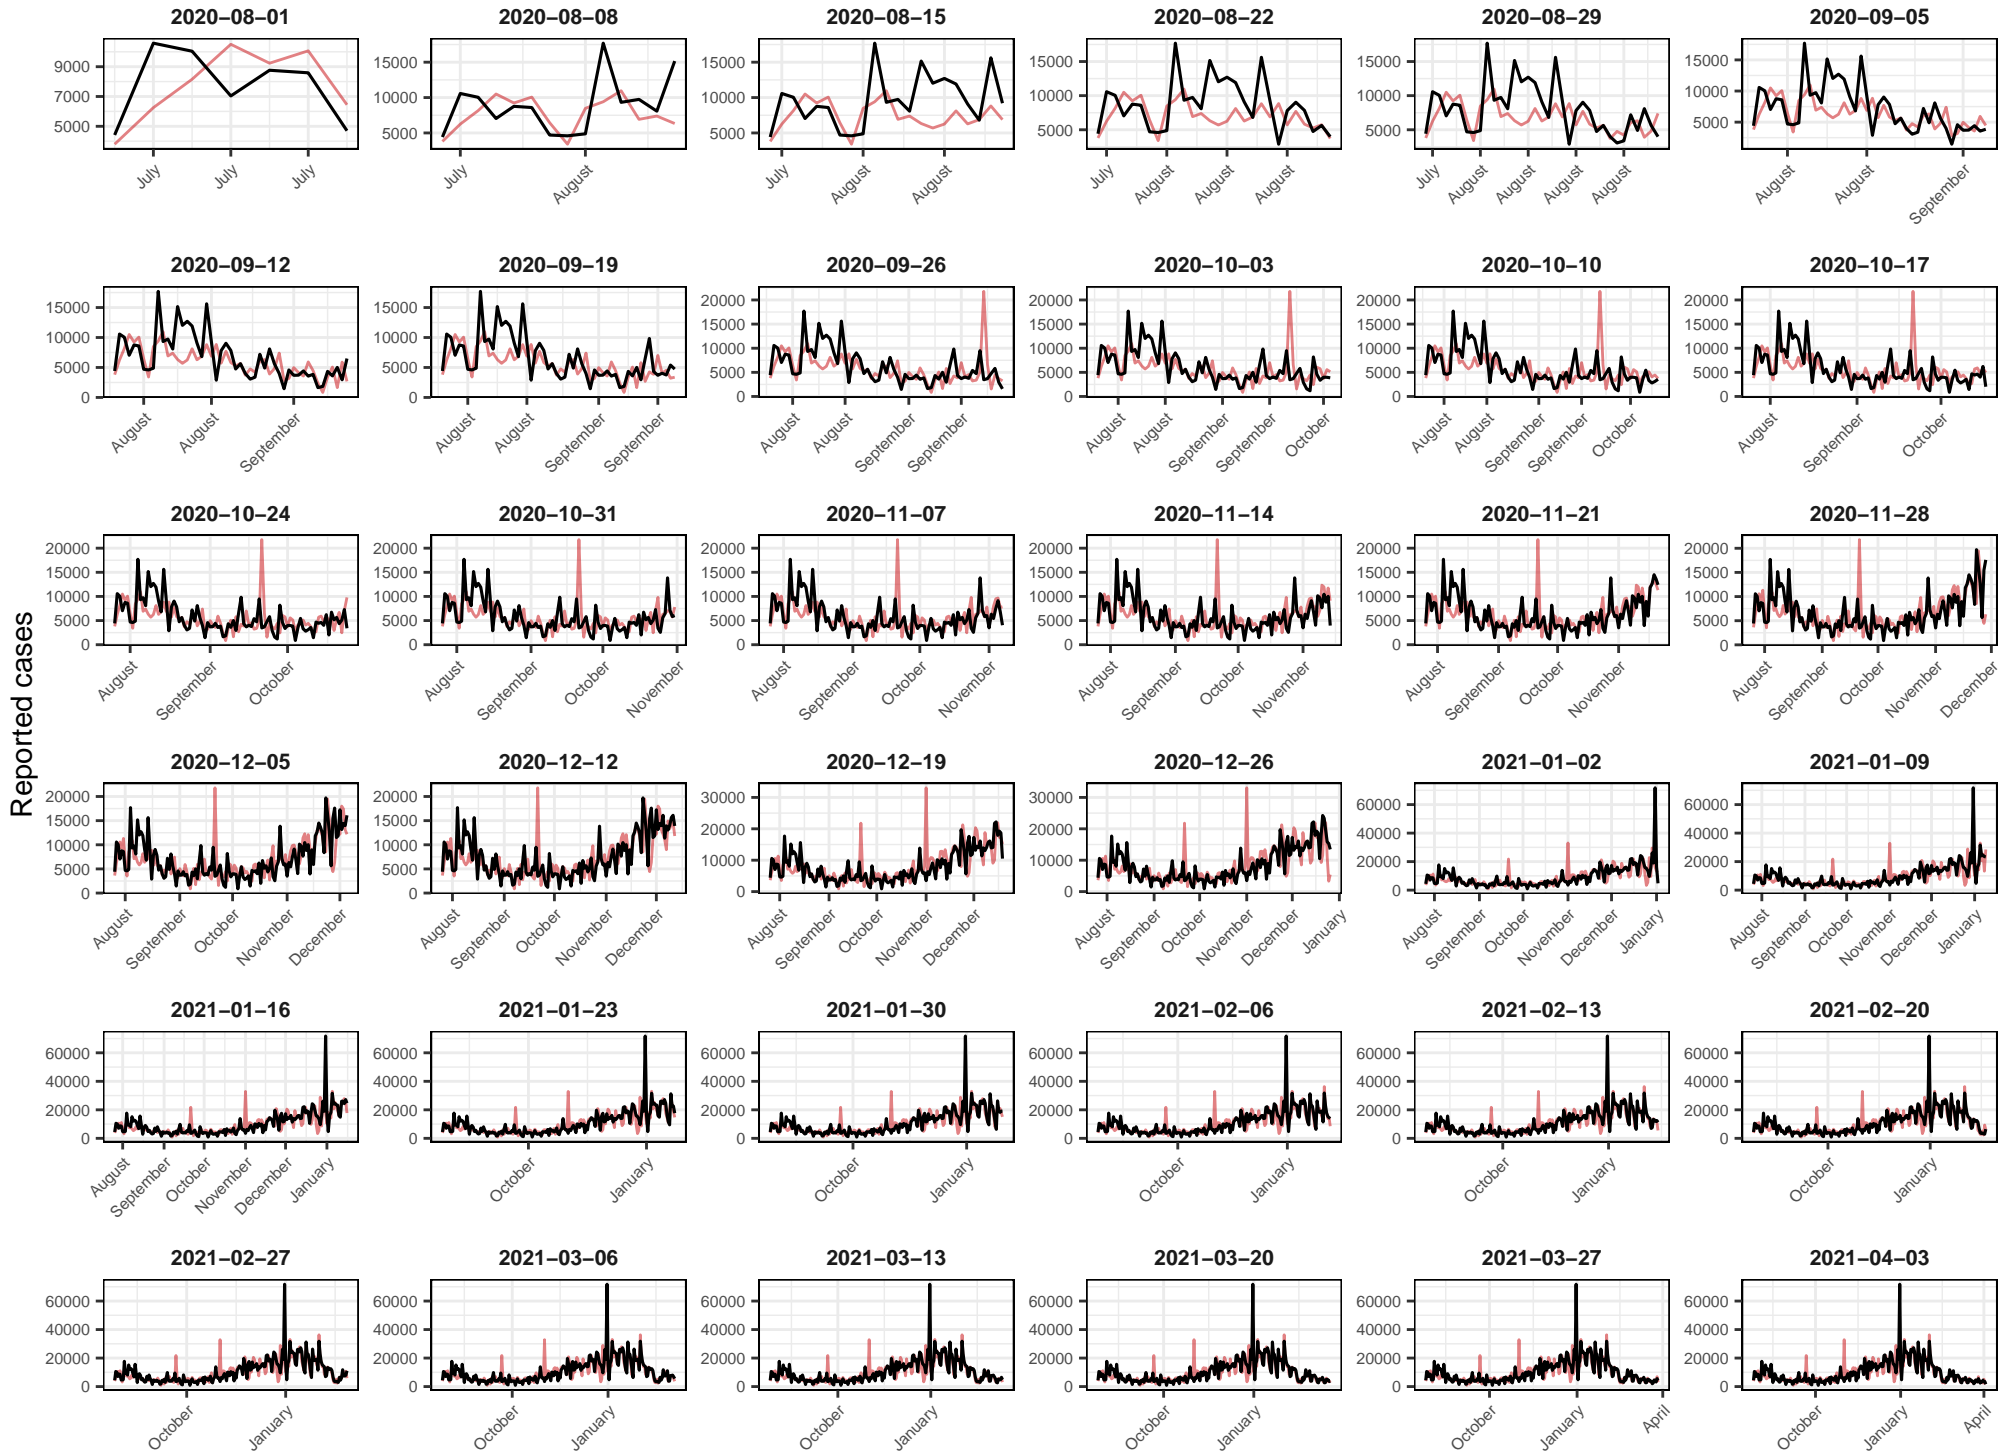

# Texas

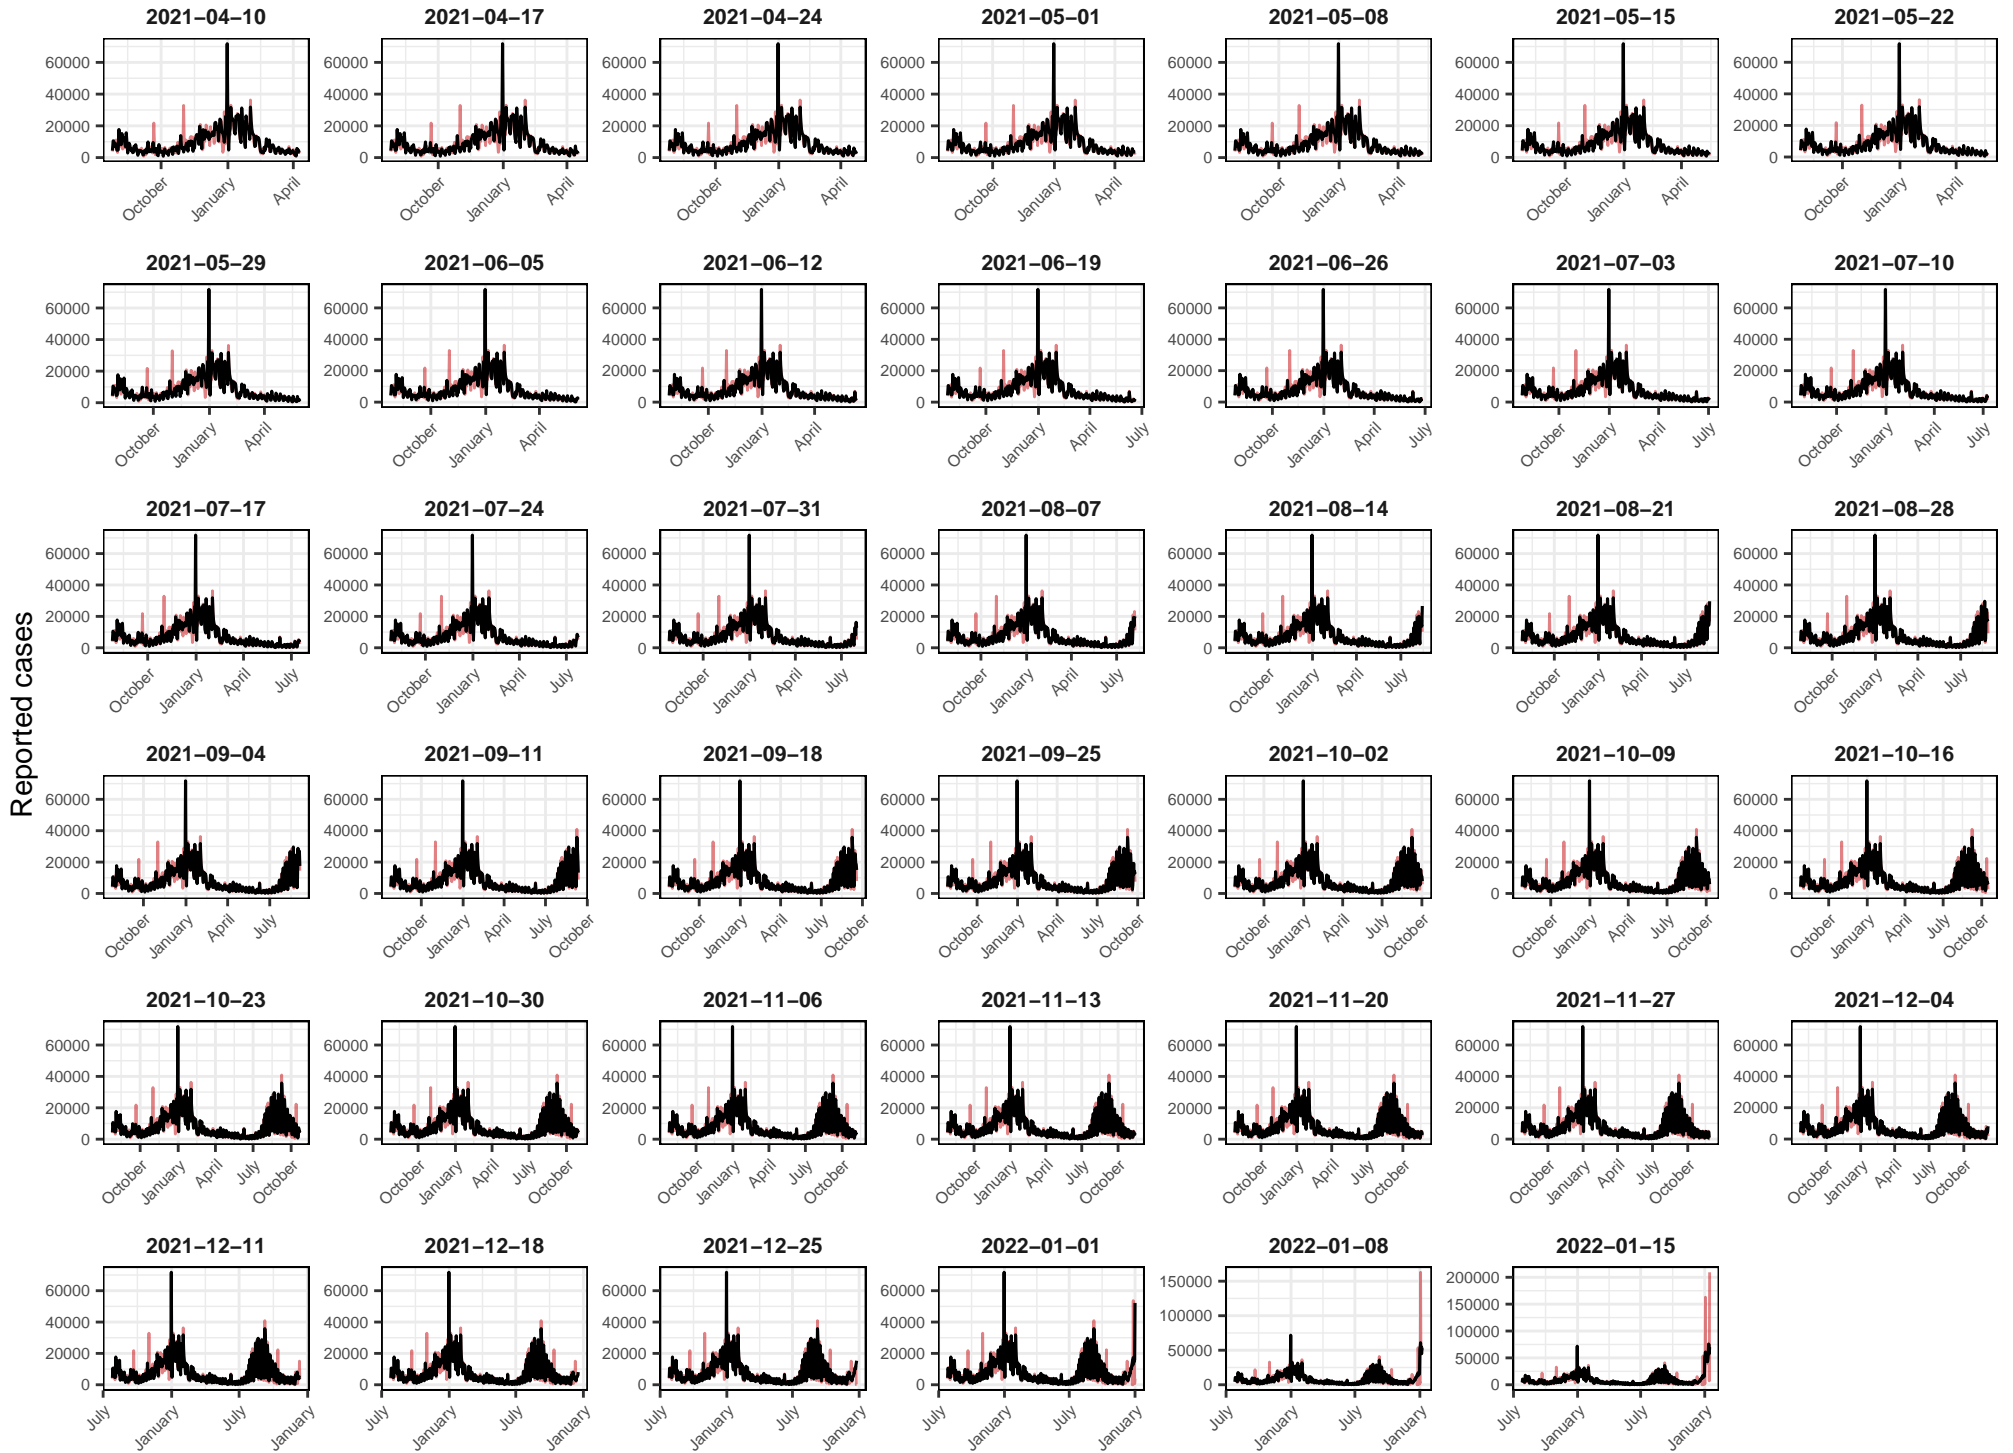



# Utah

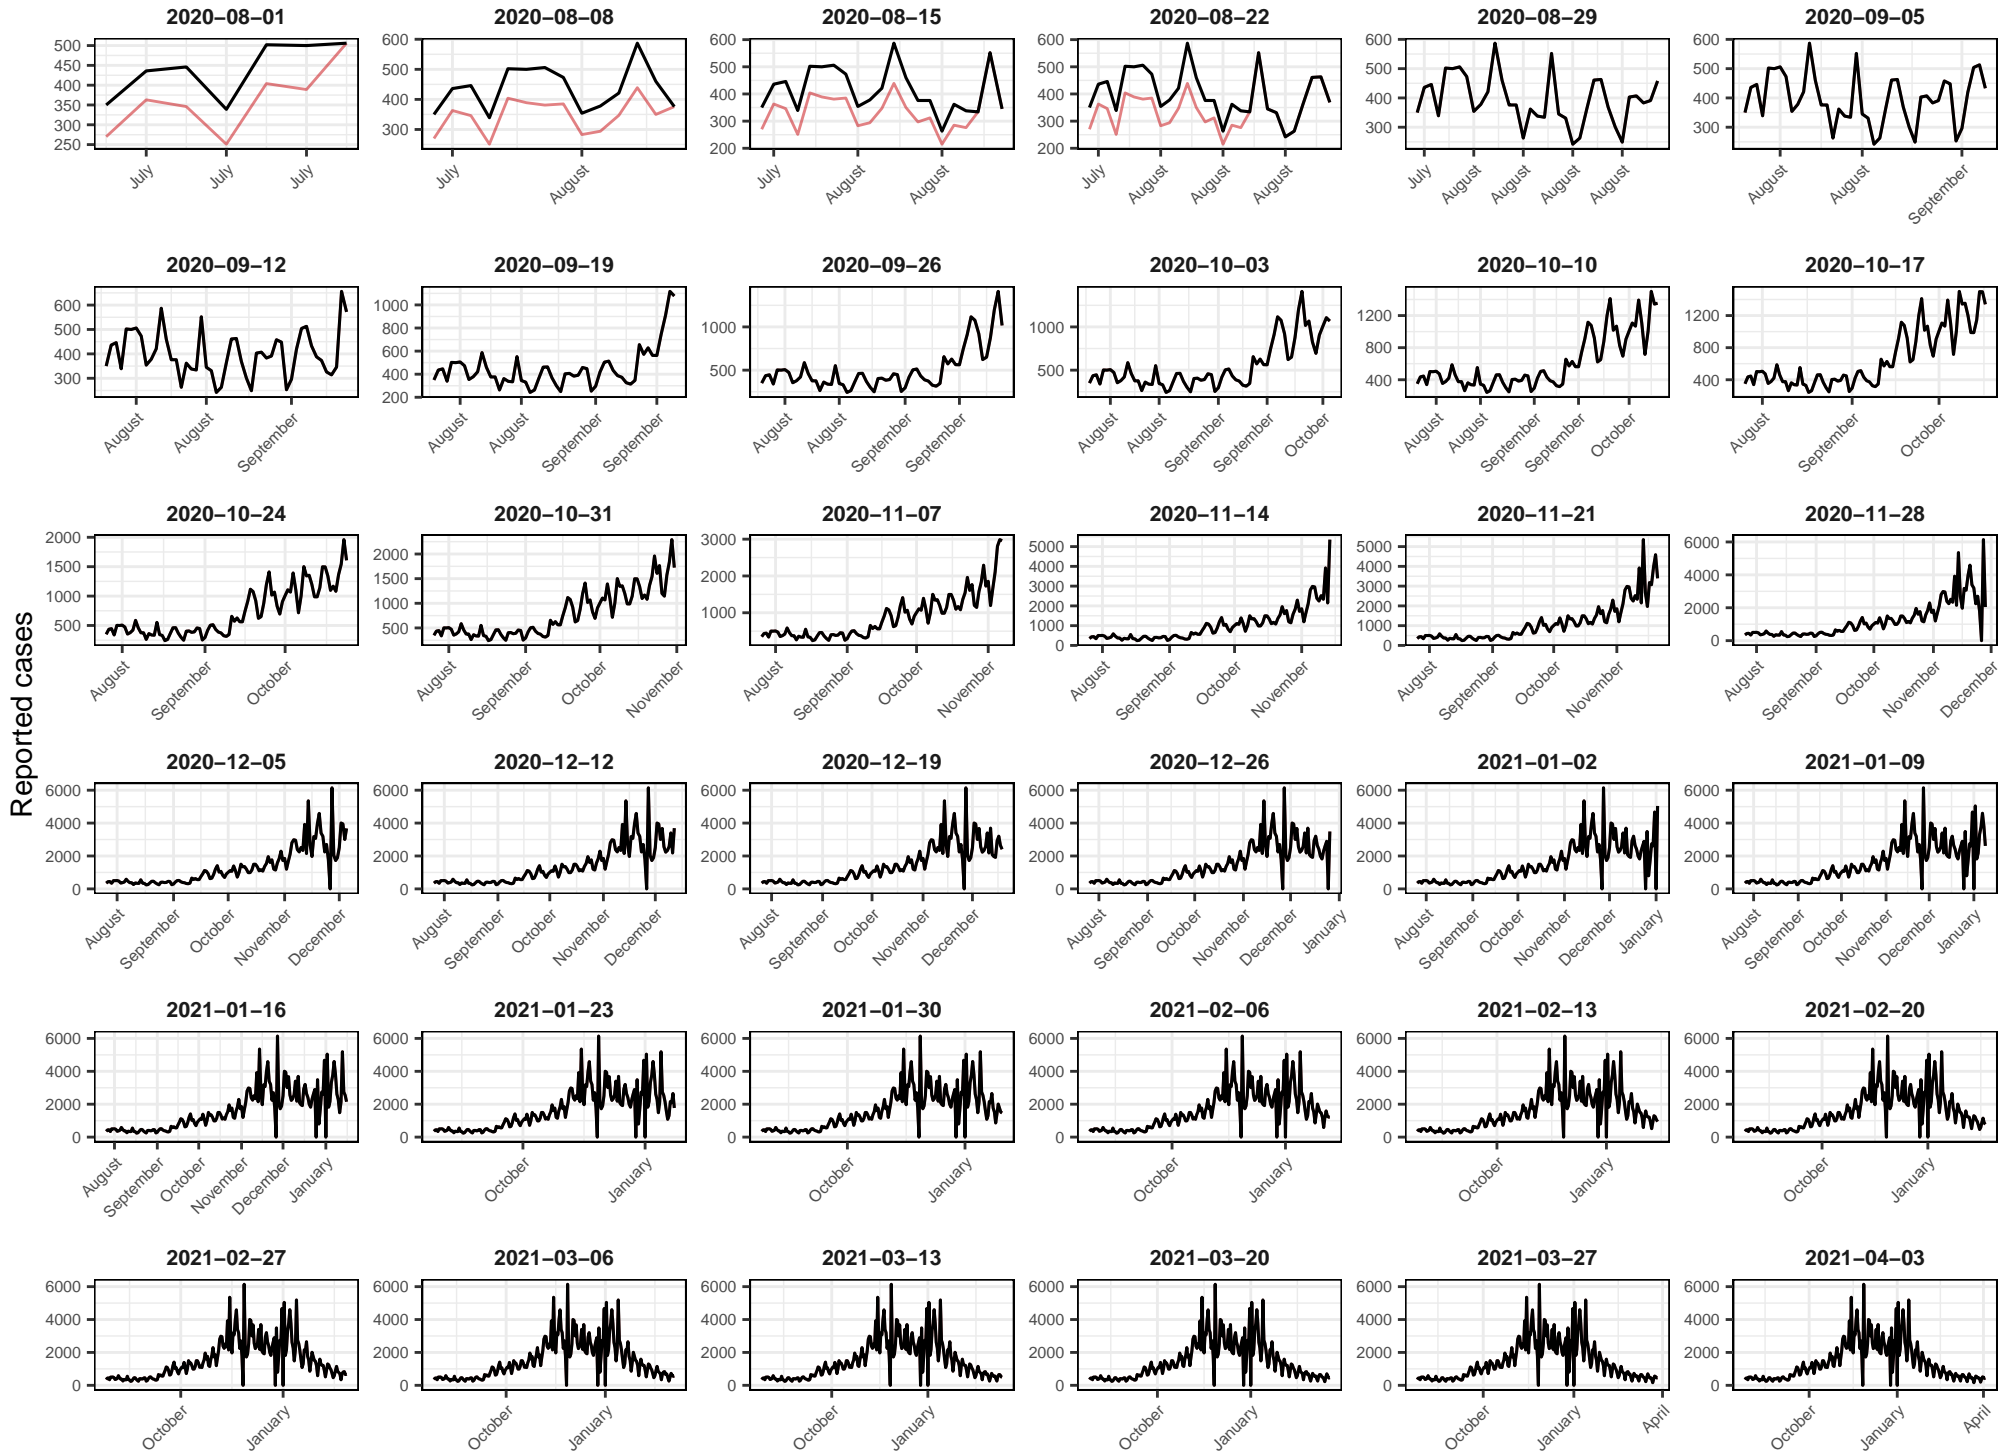

# Utah

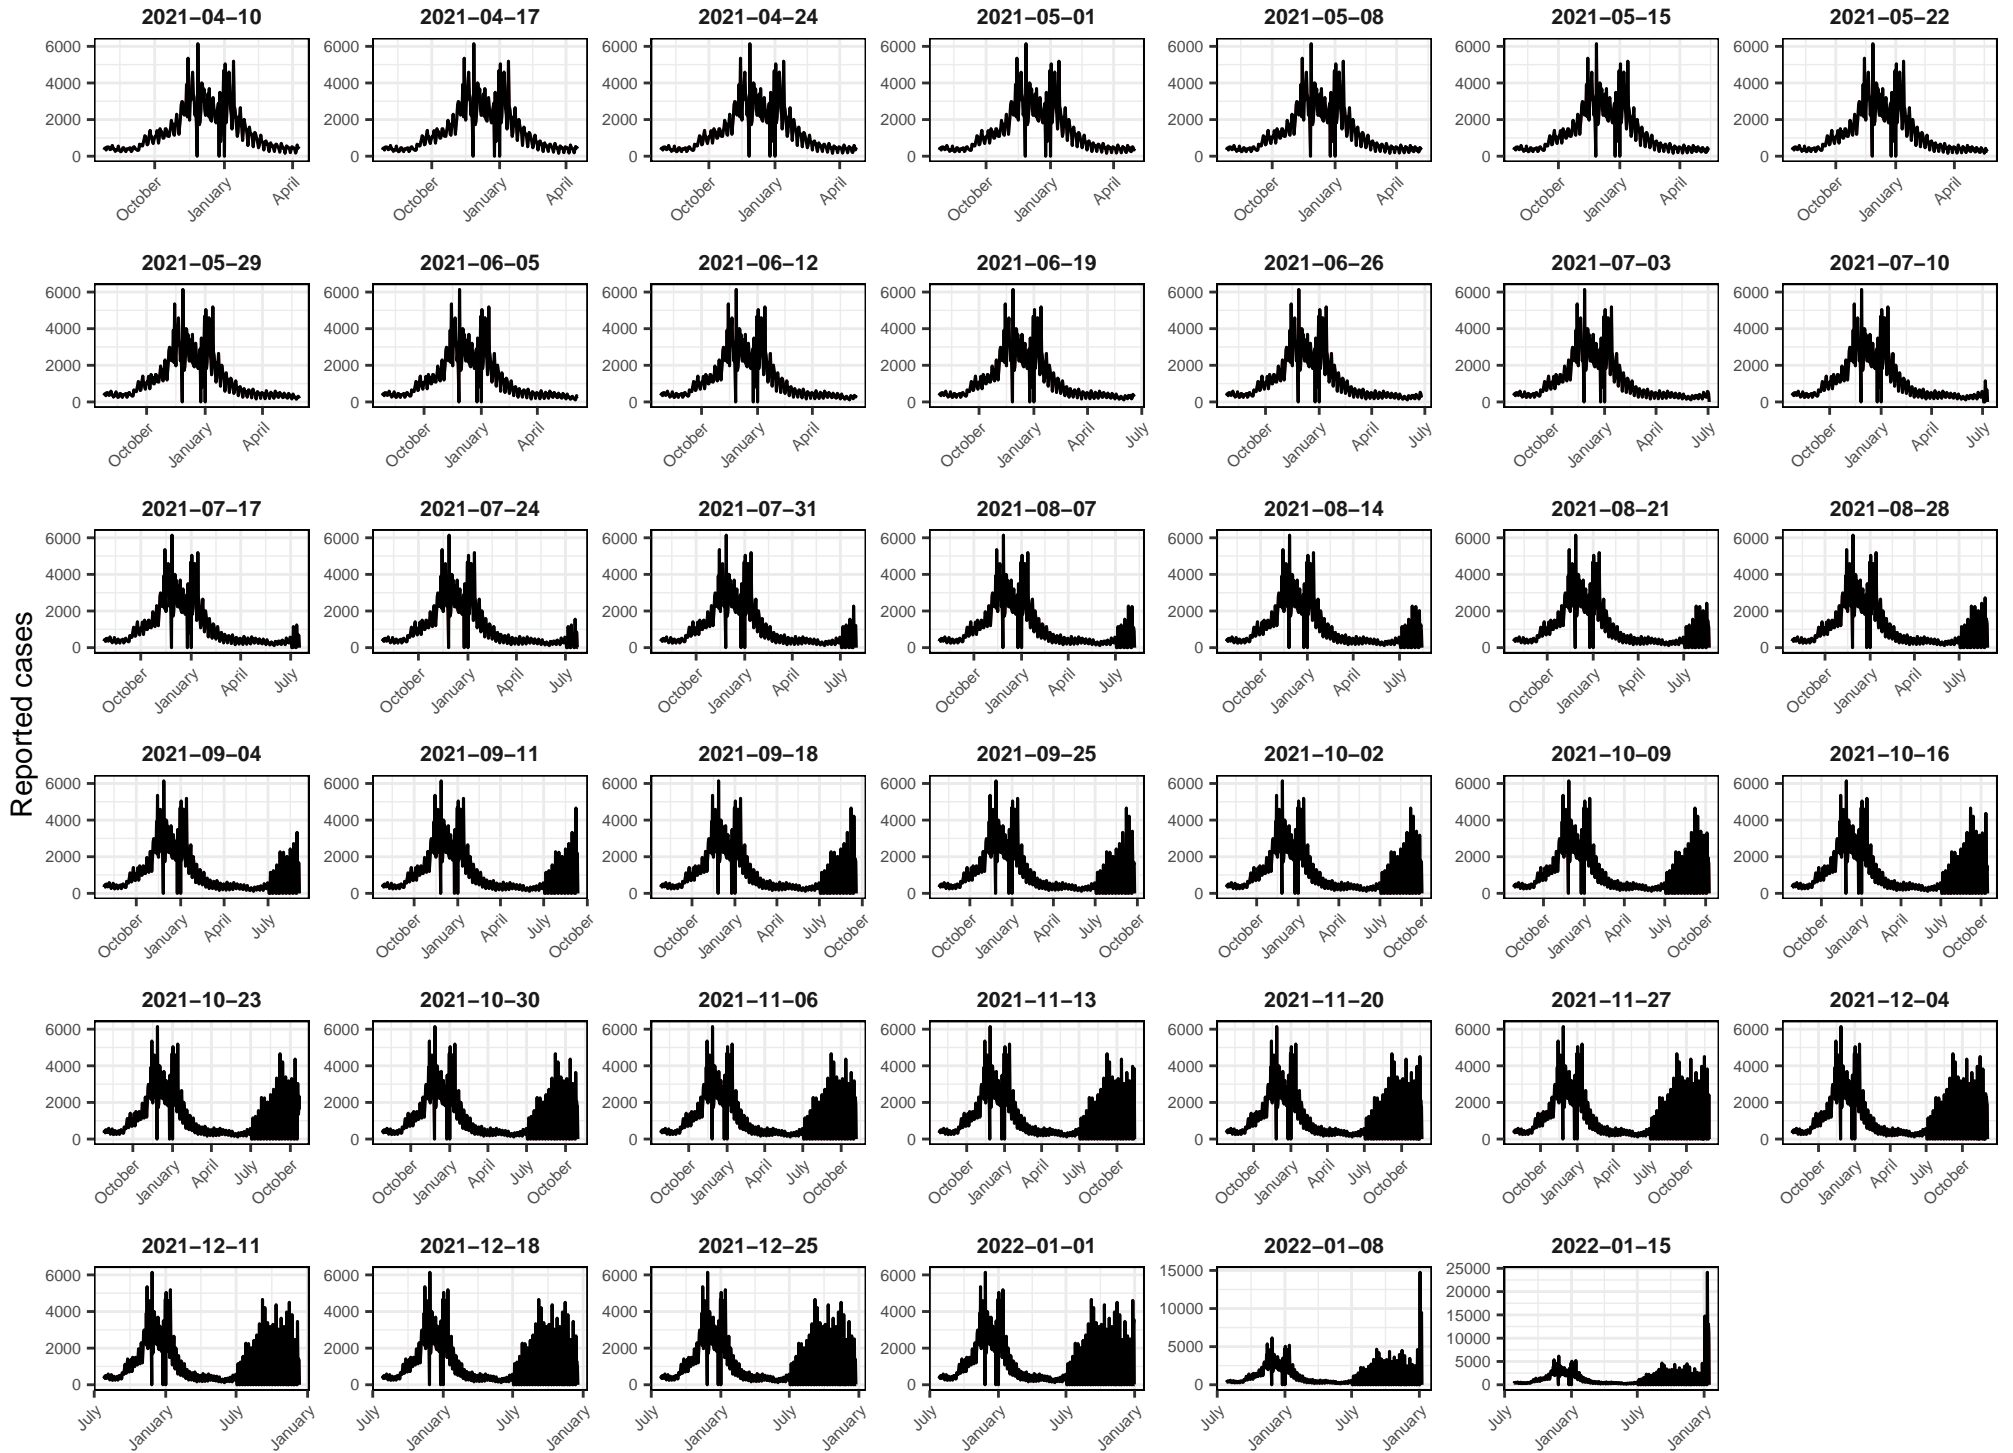

# Vermont

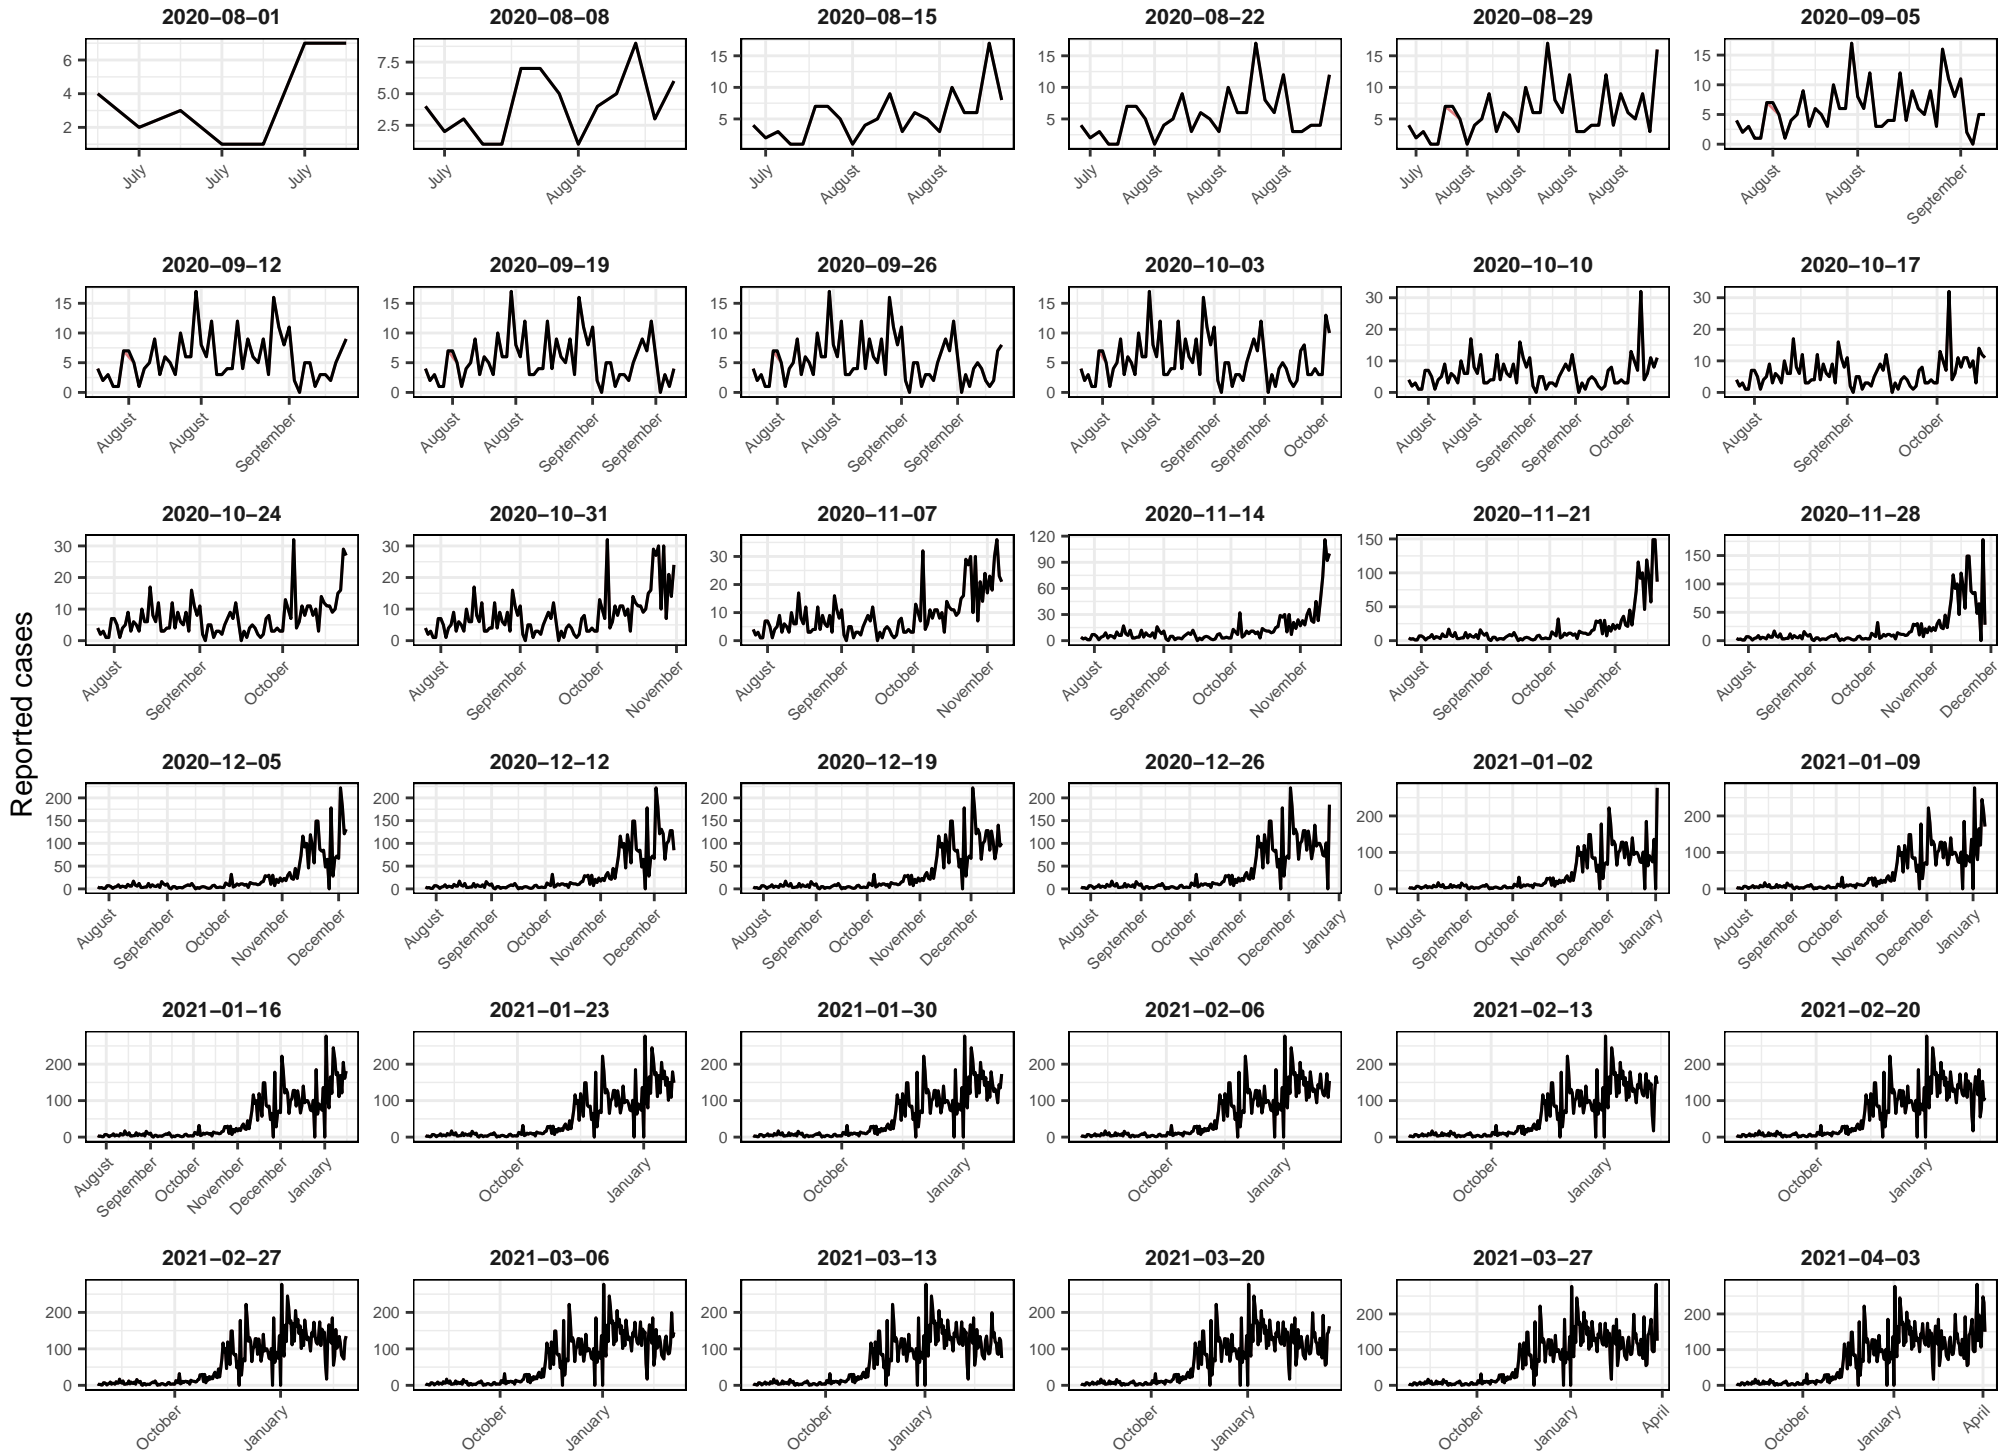

# Vermont

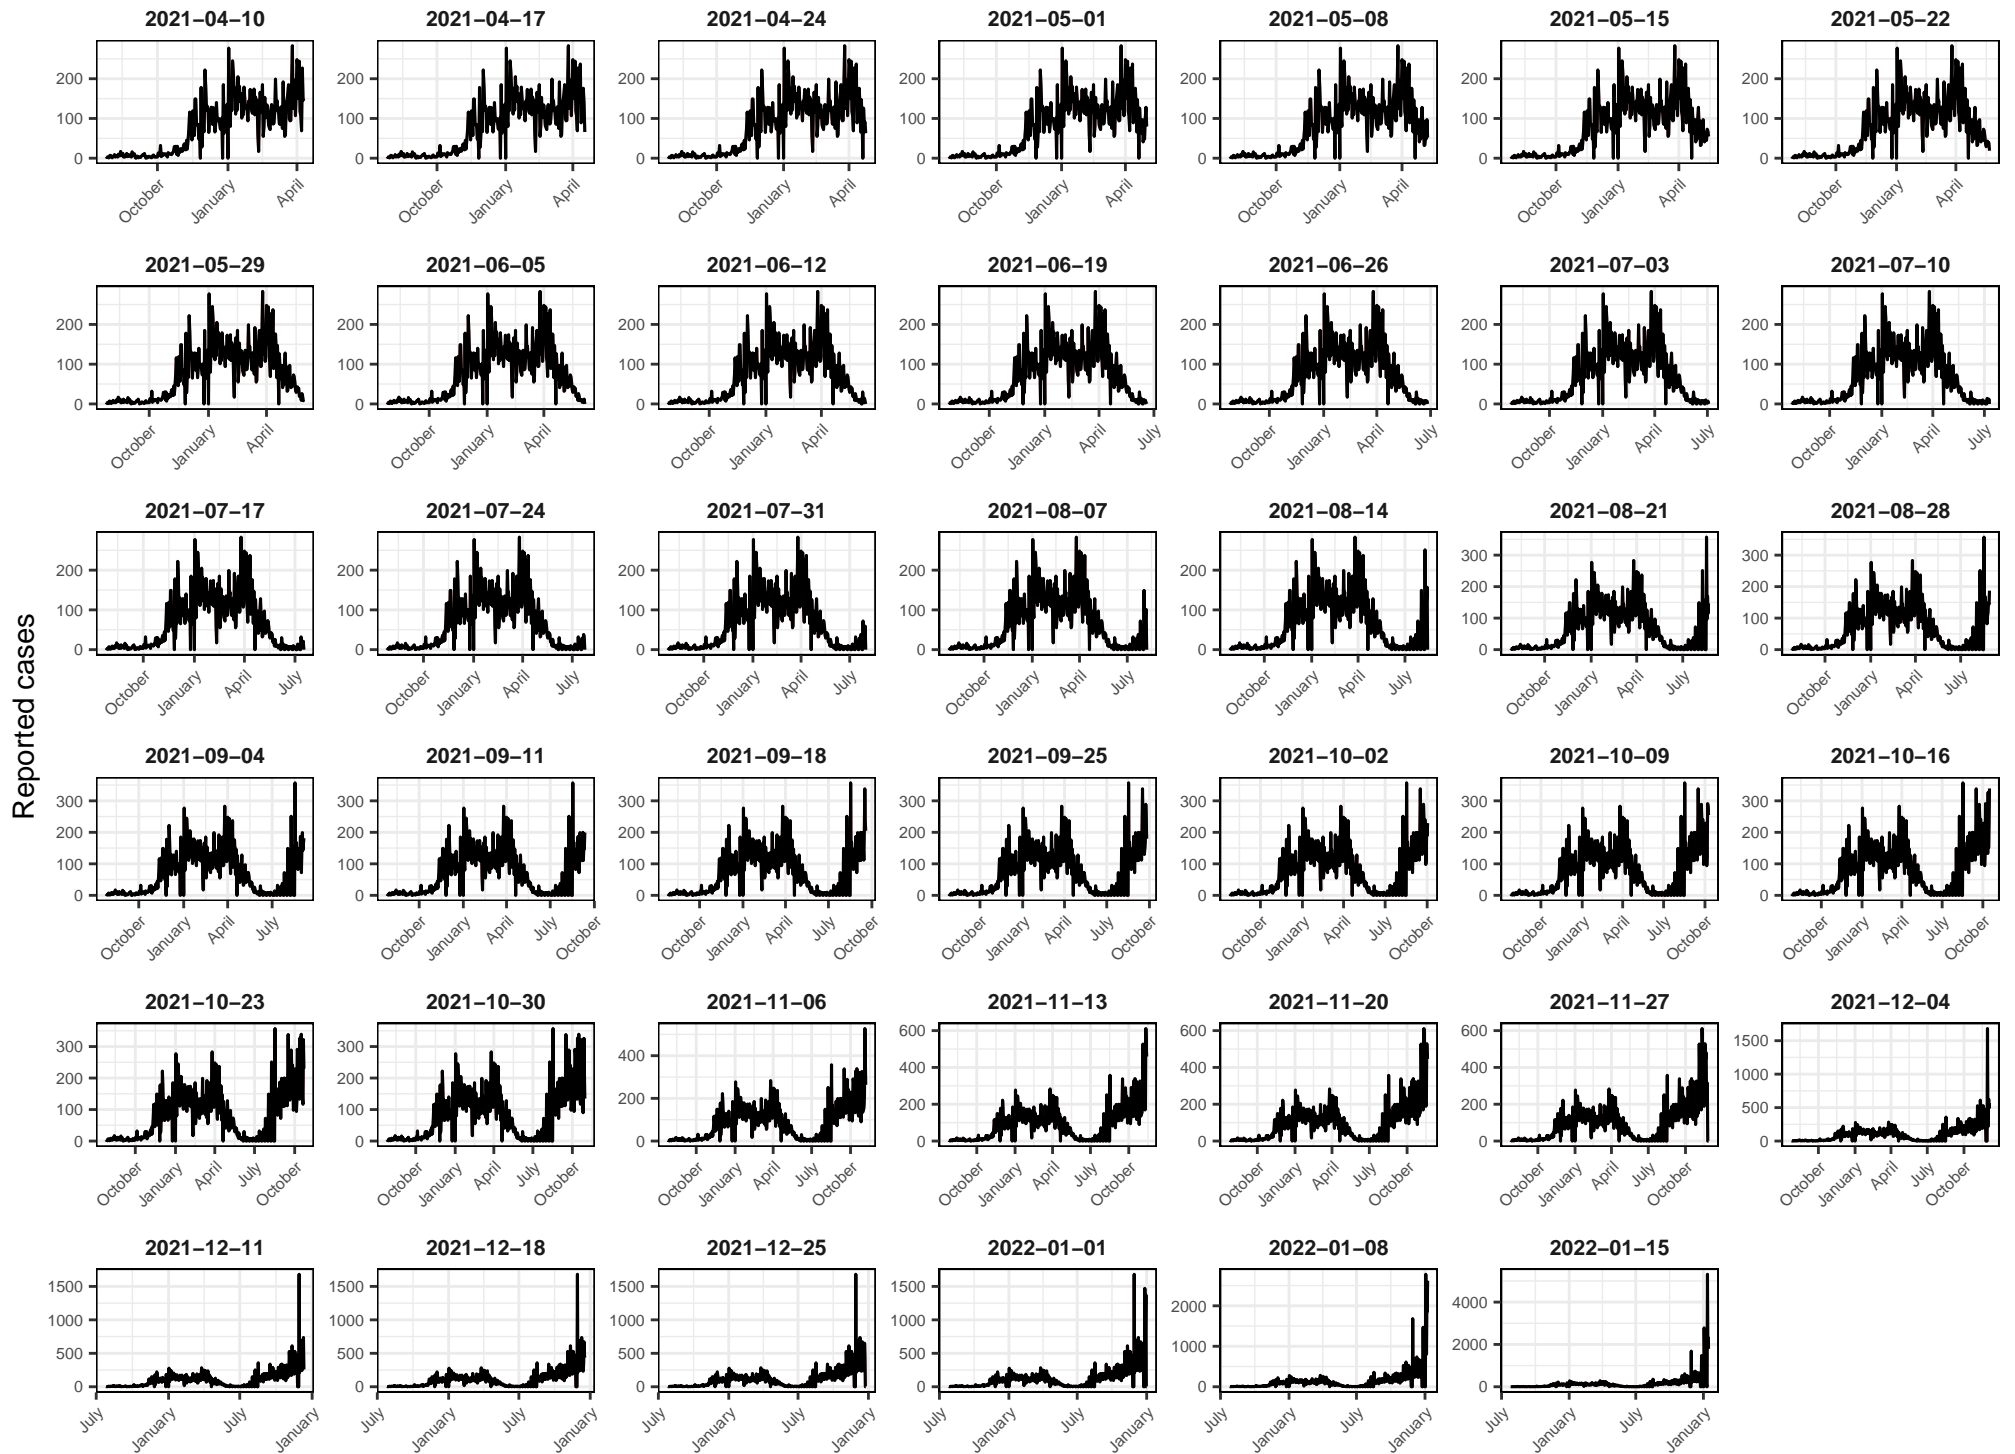

# Virginia

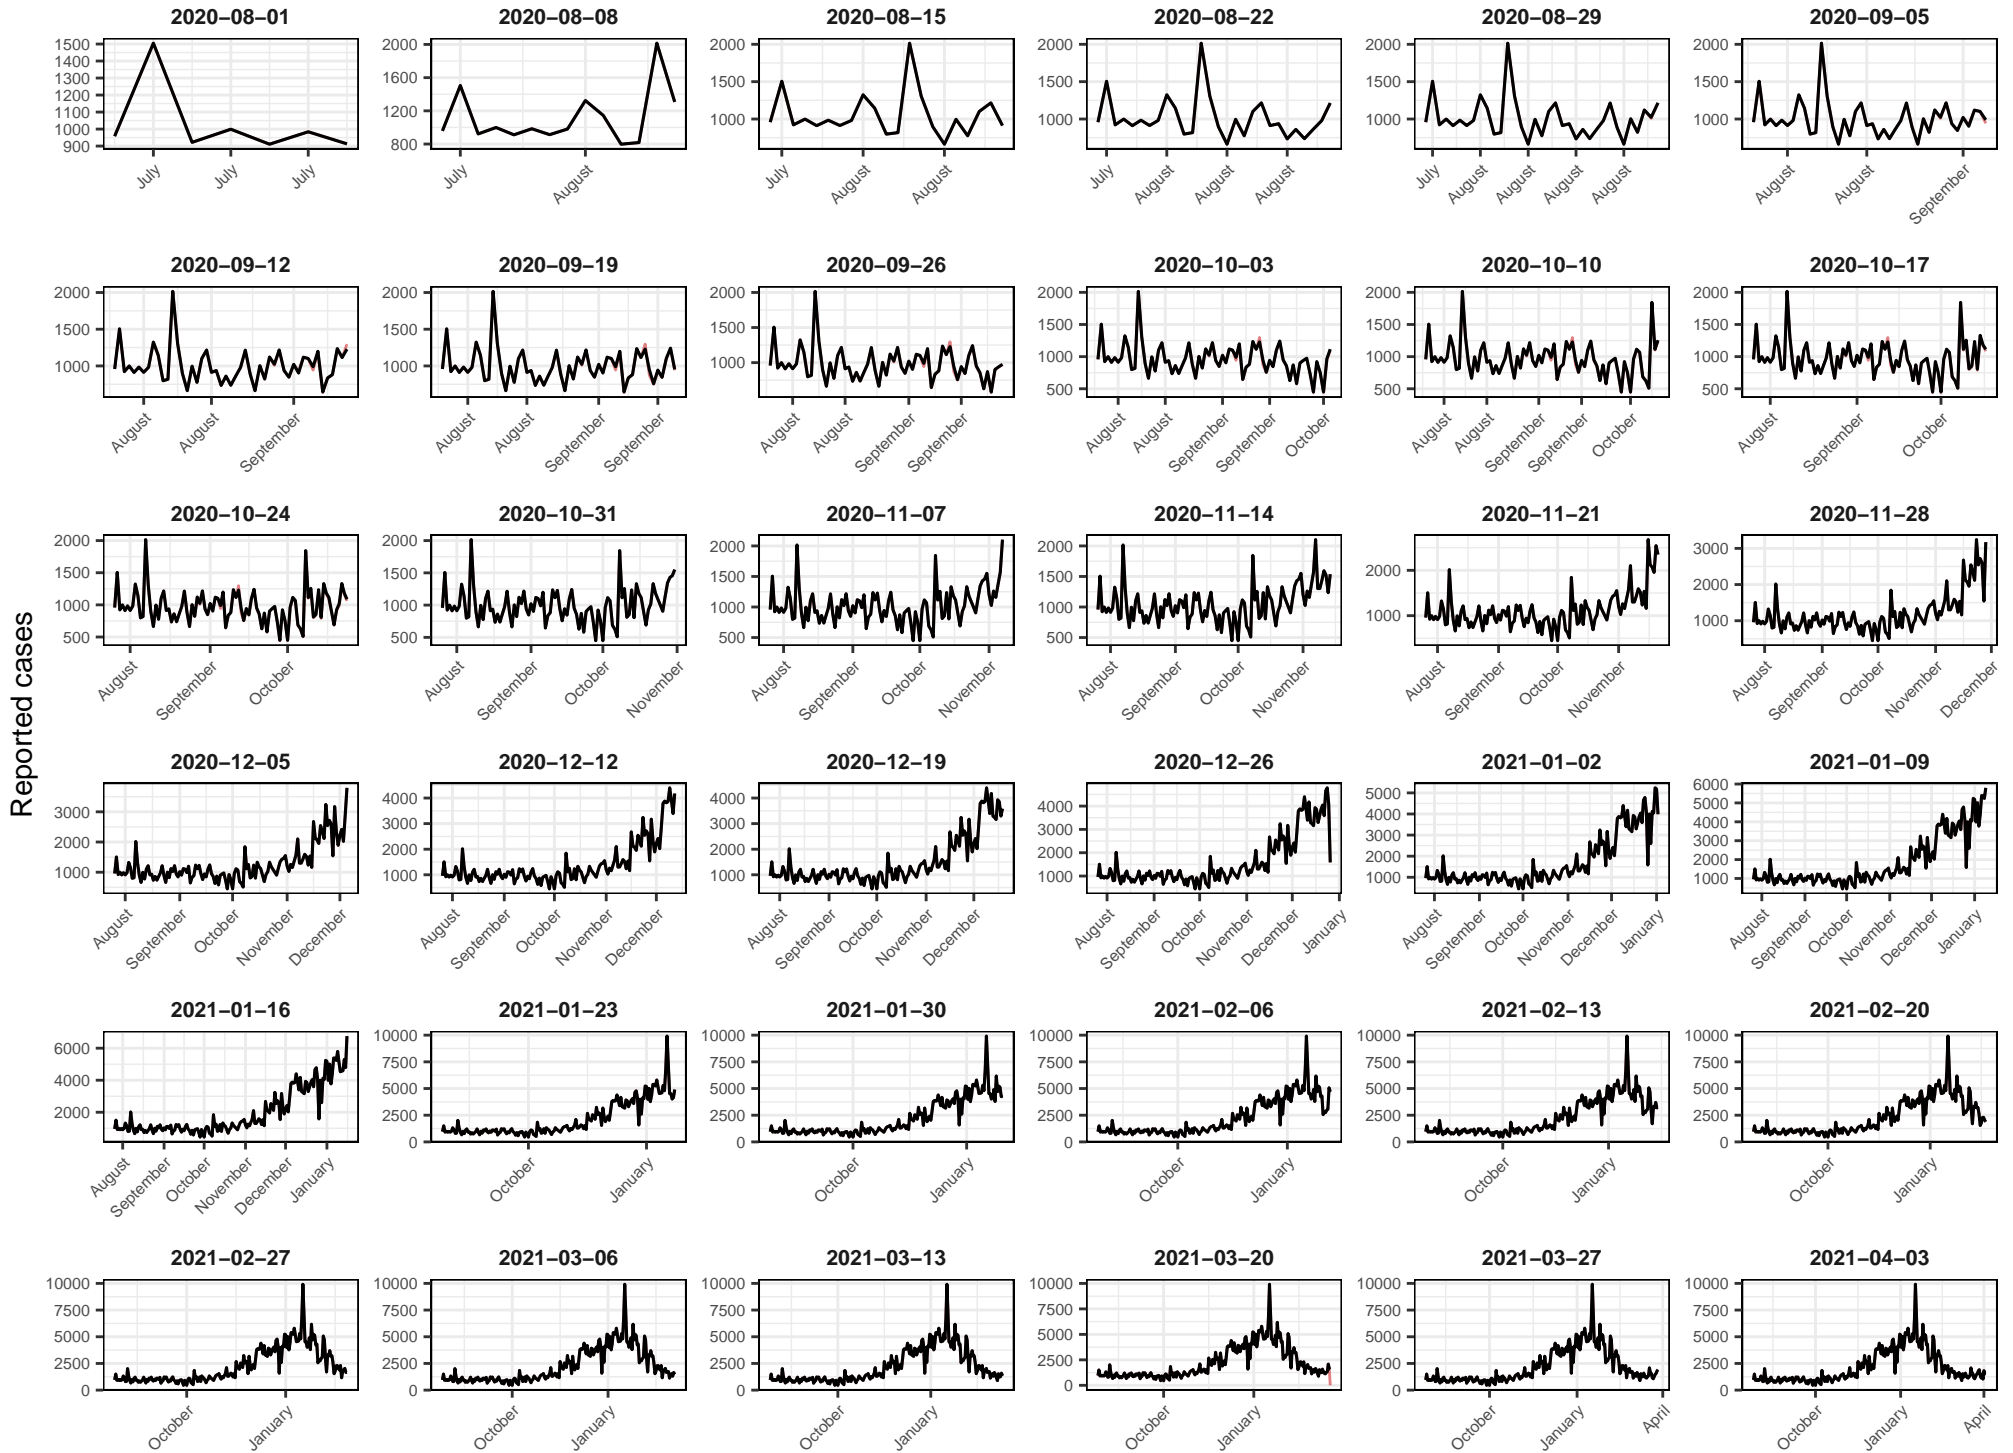

# Virginia

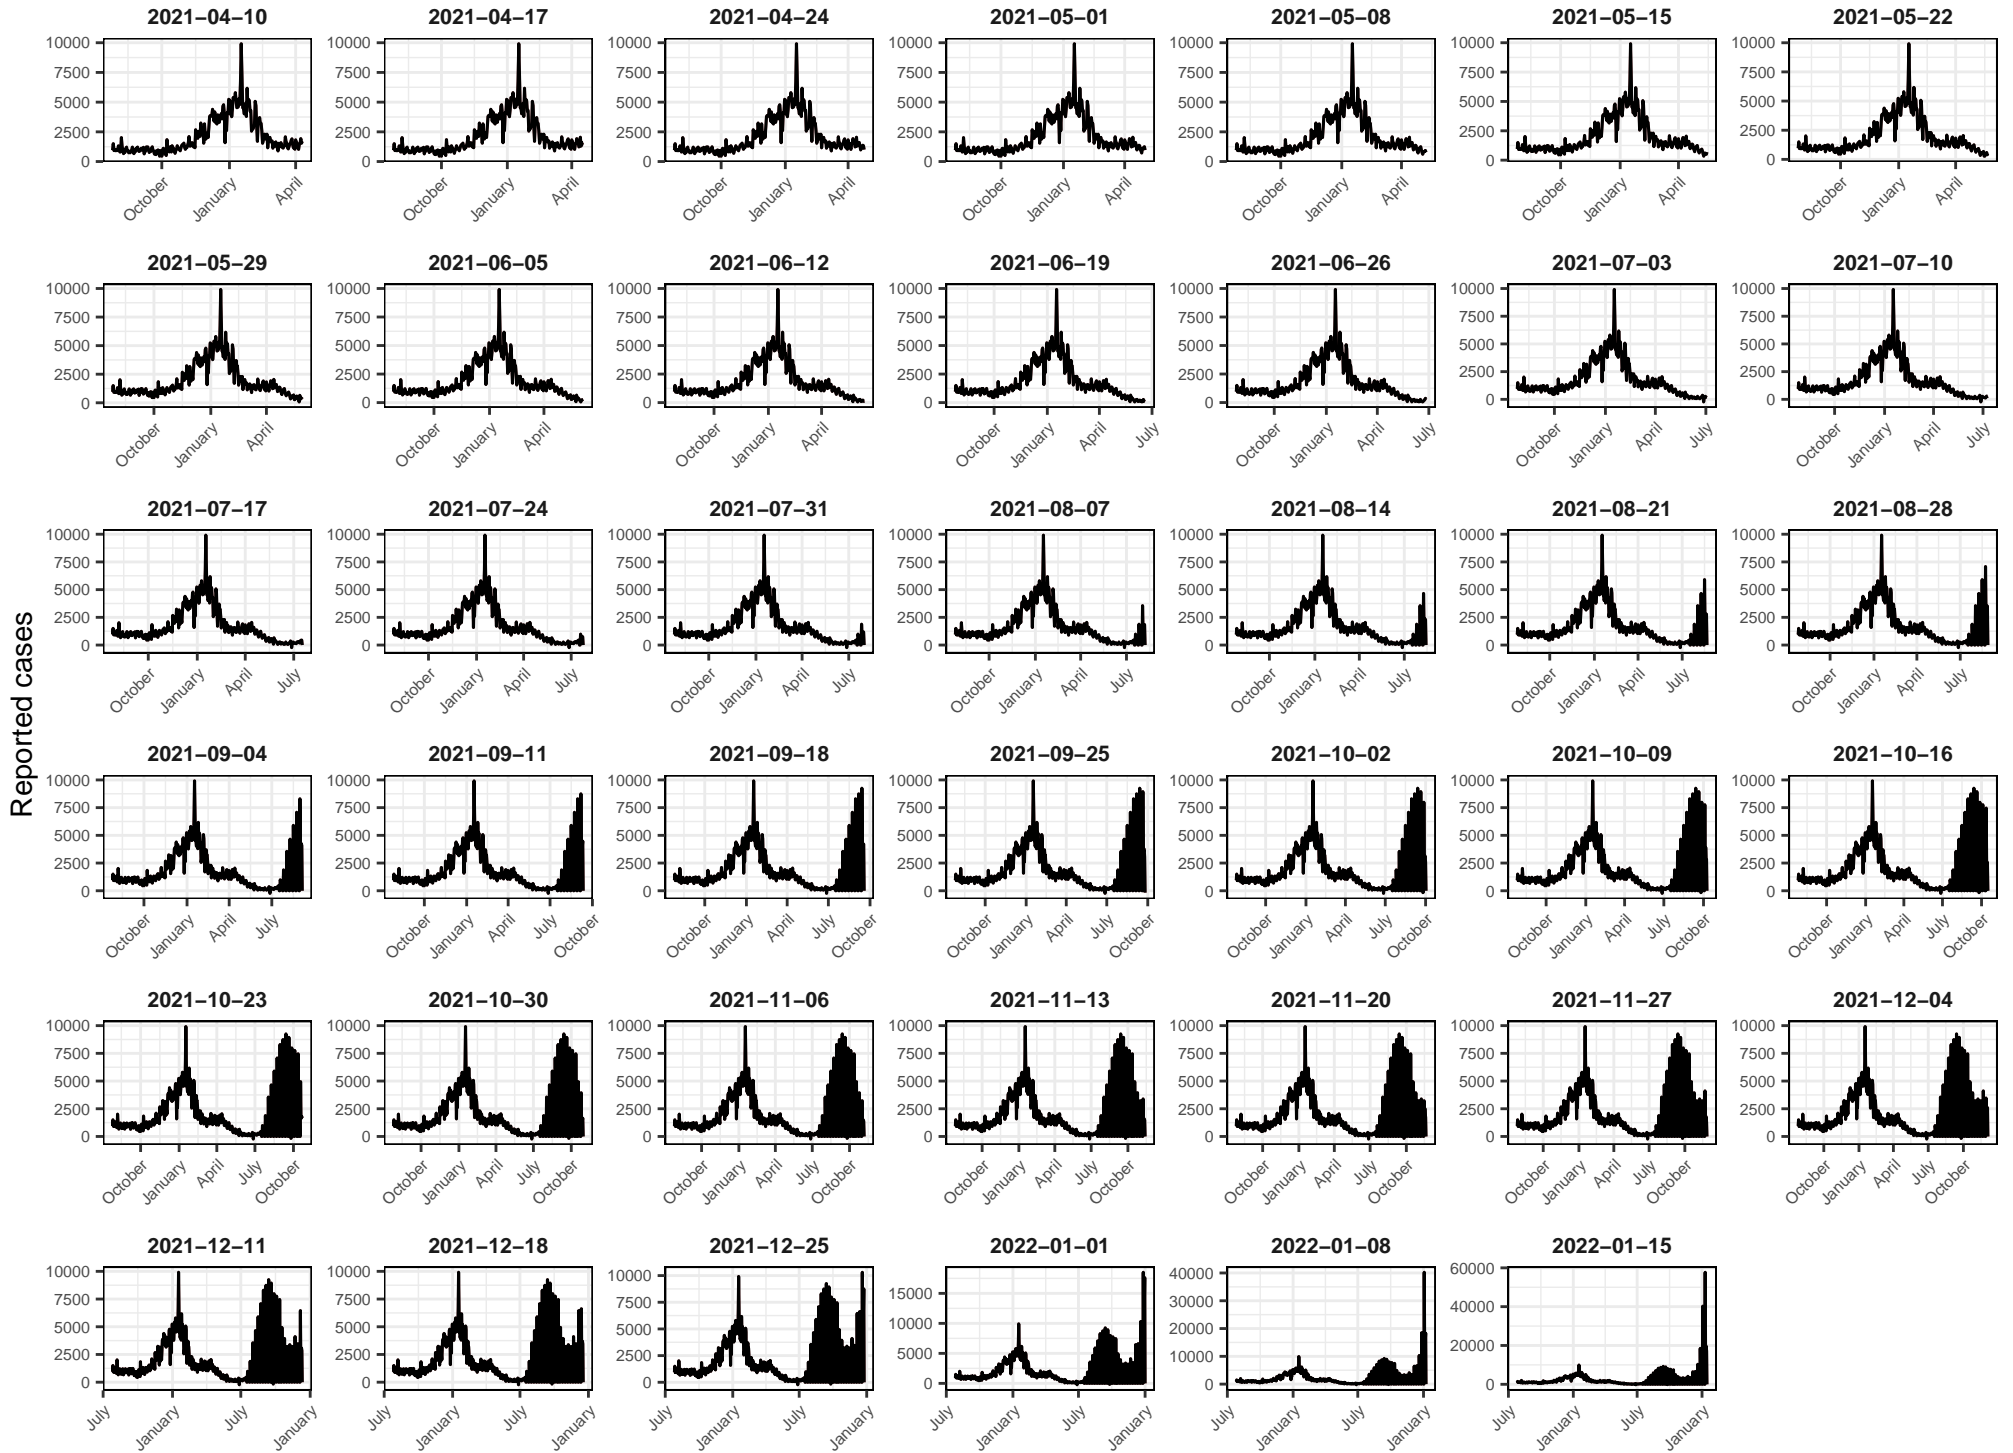

# Washington

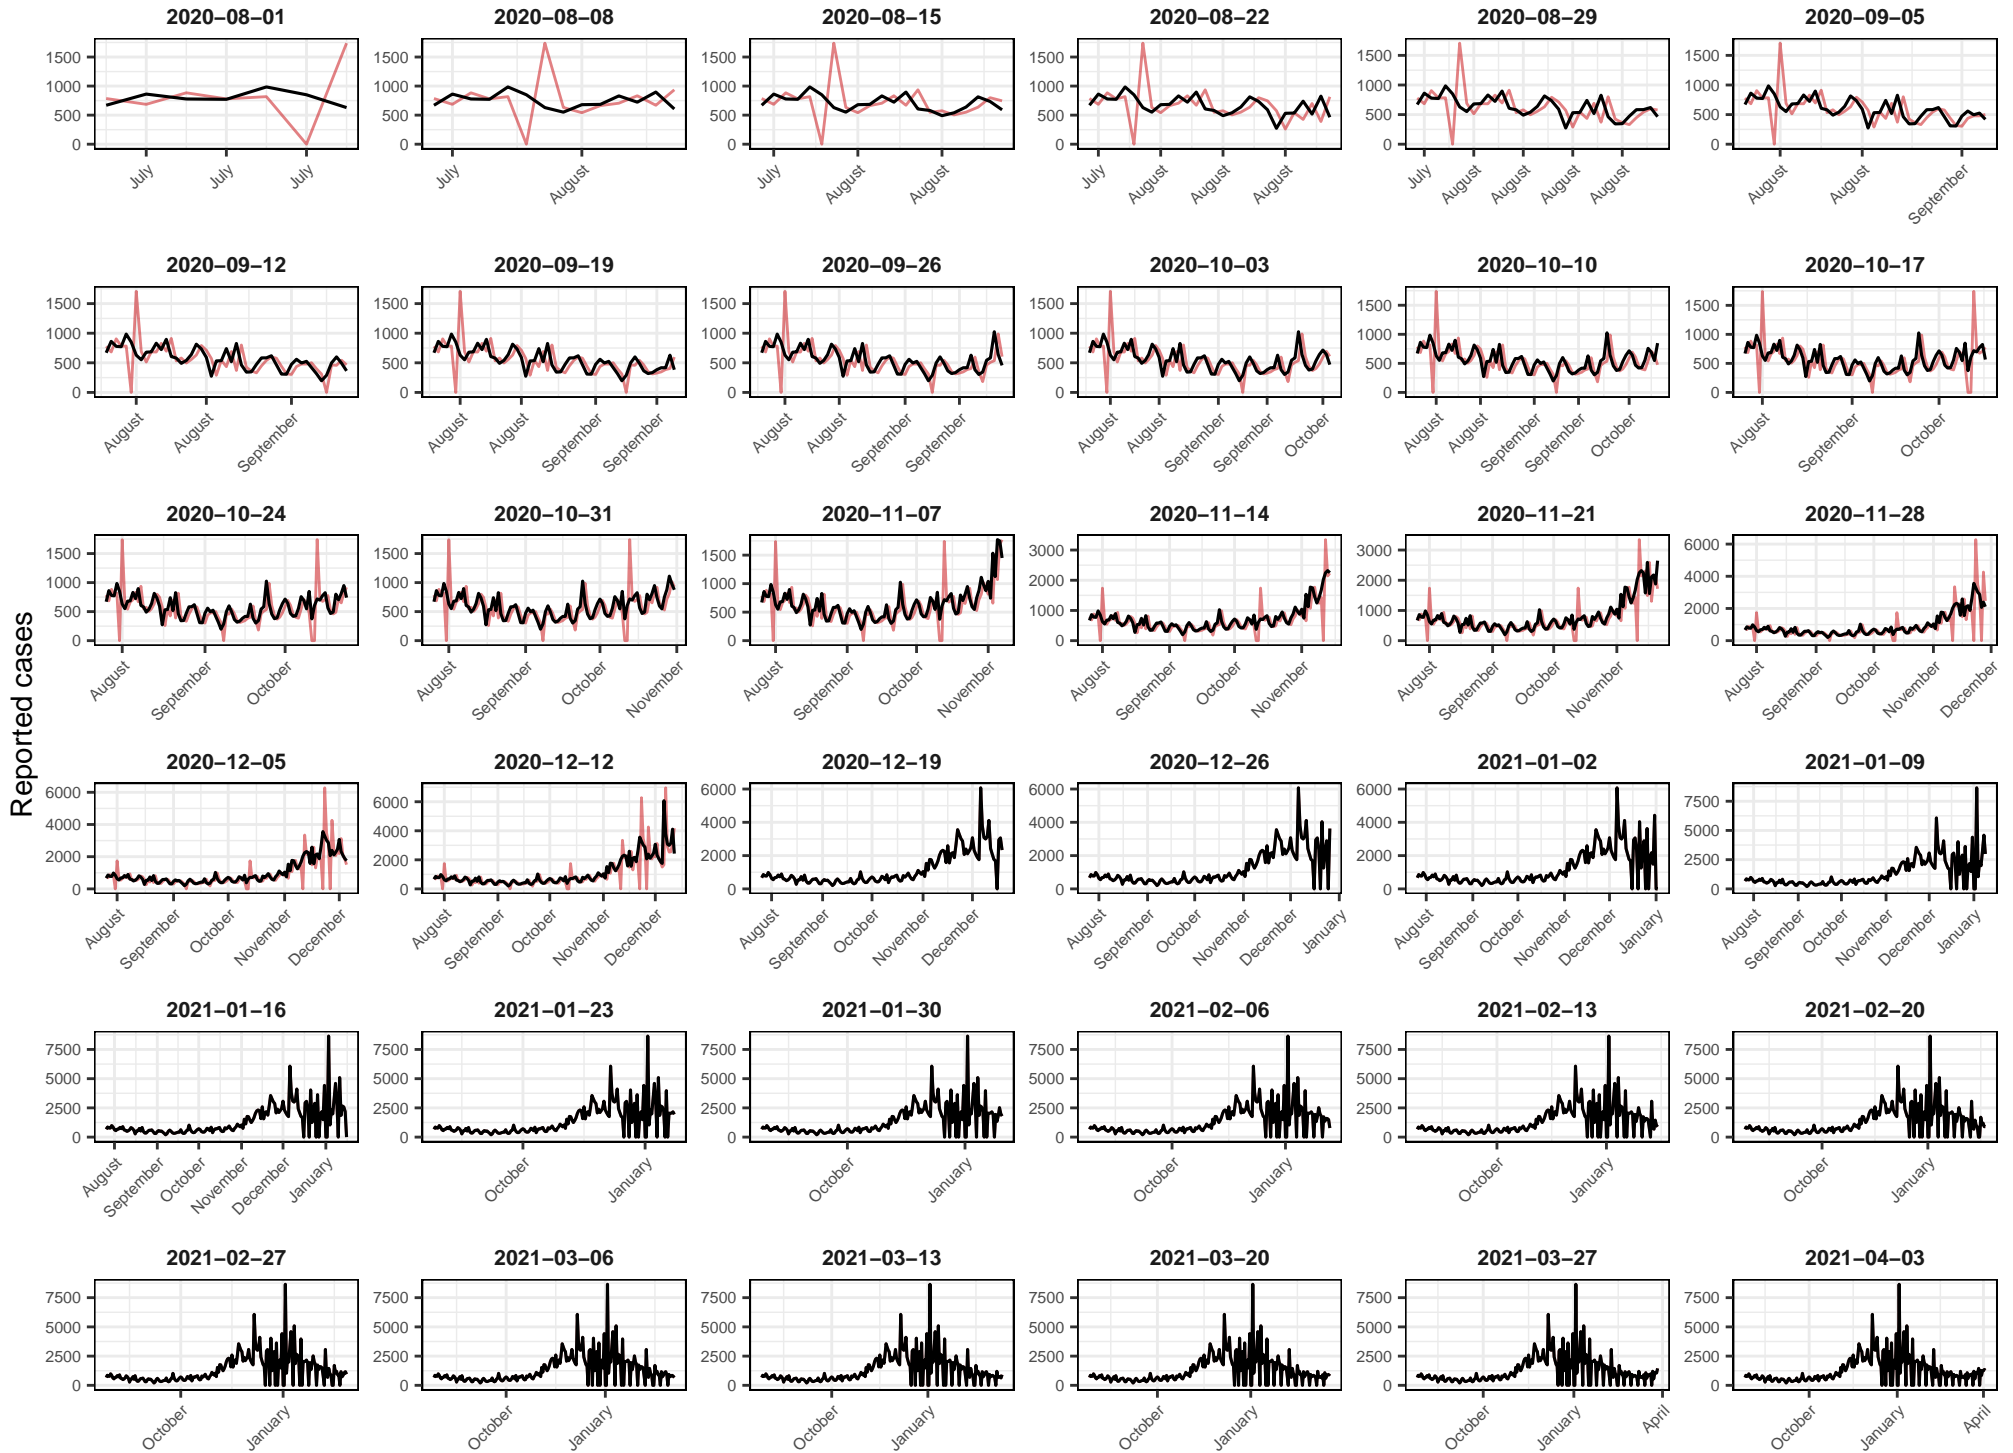

# Washington

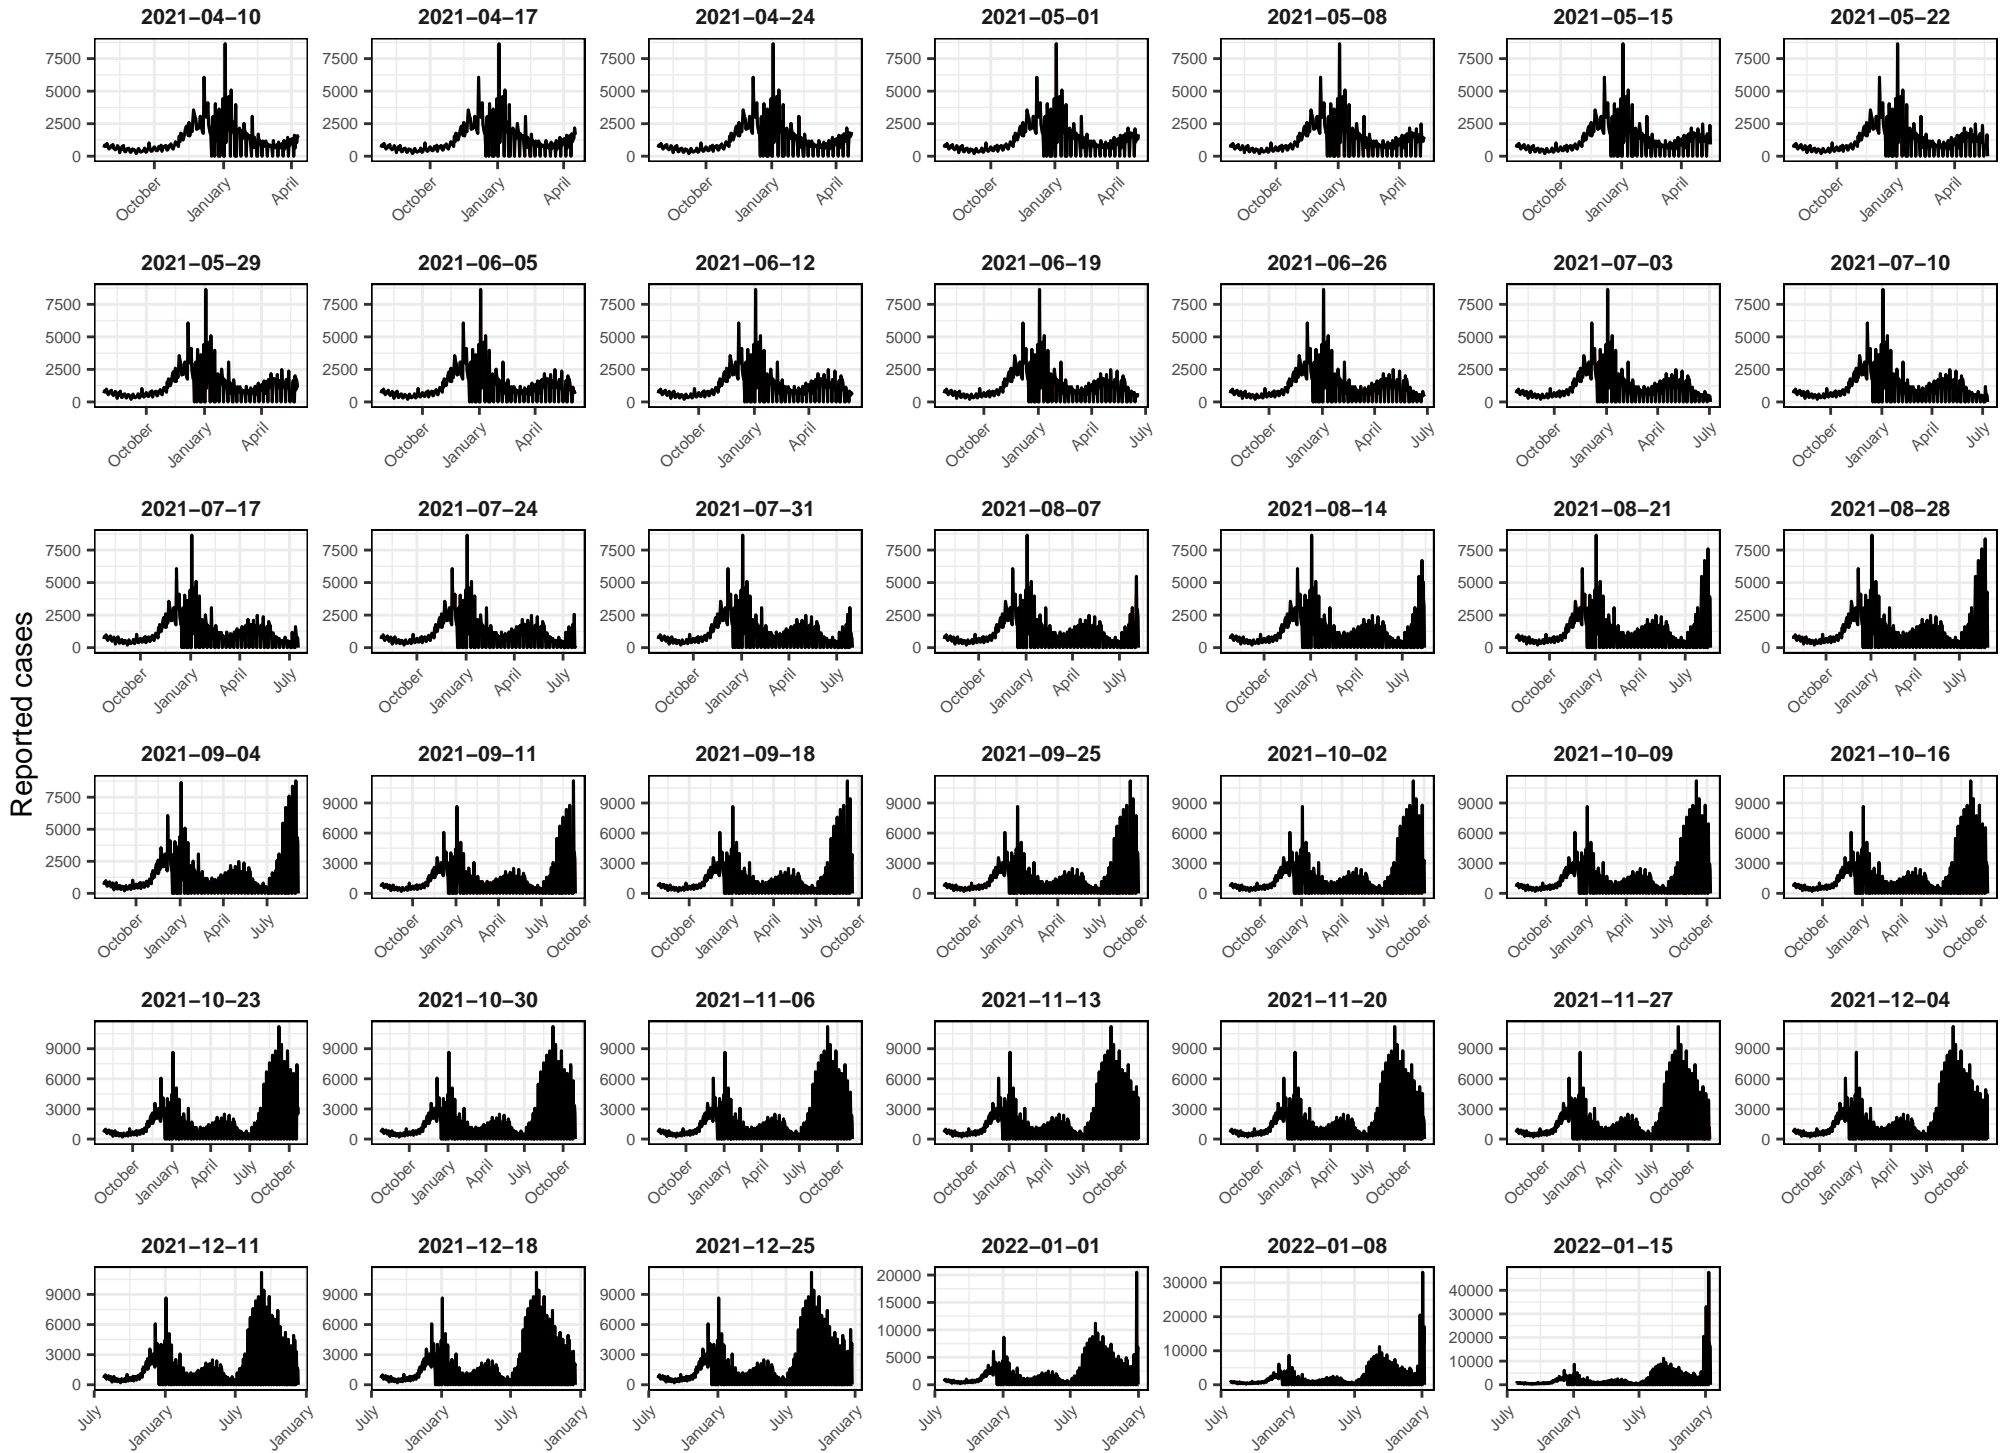



# West Virginia

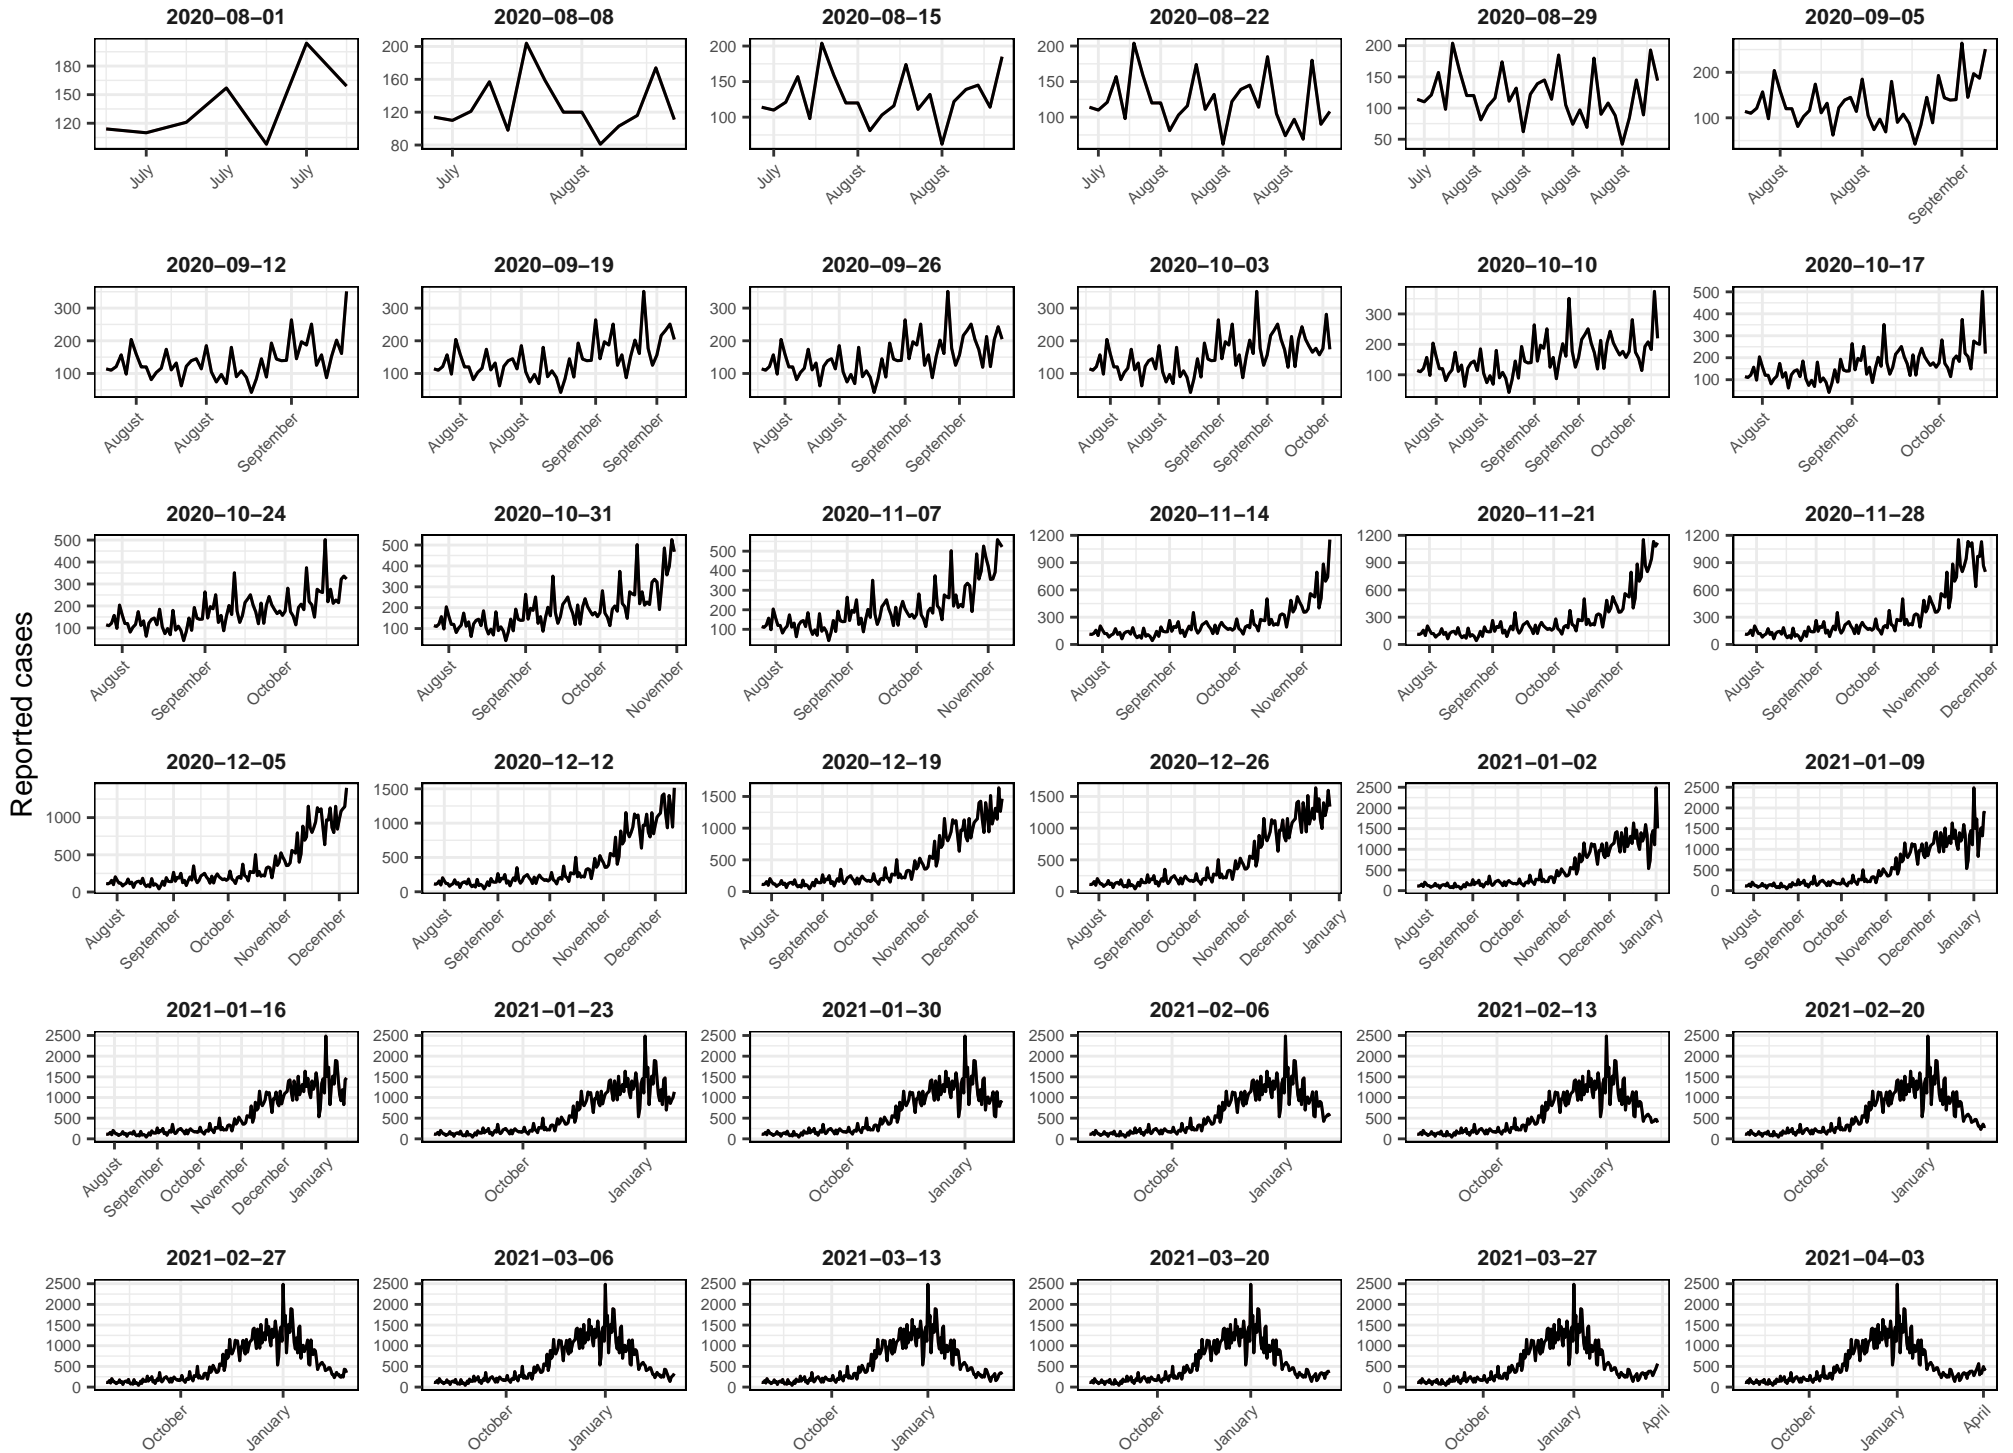

# West Virginia

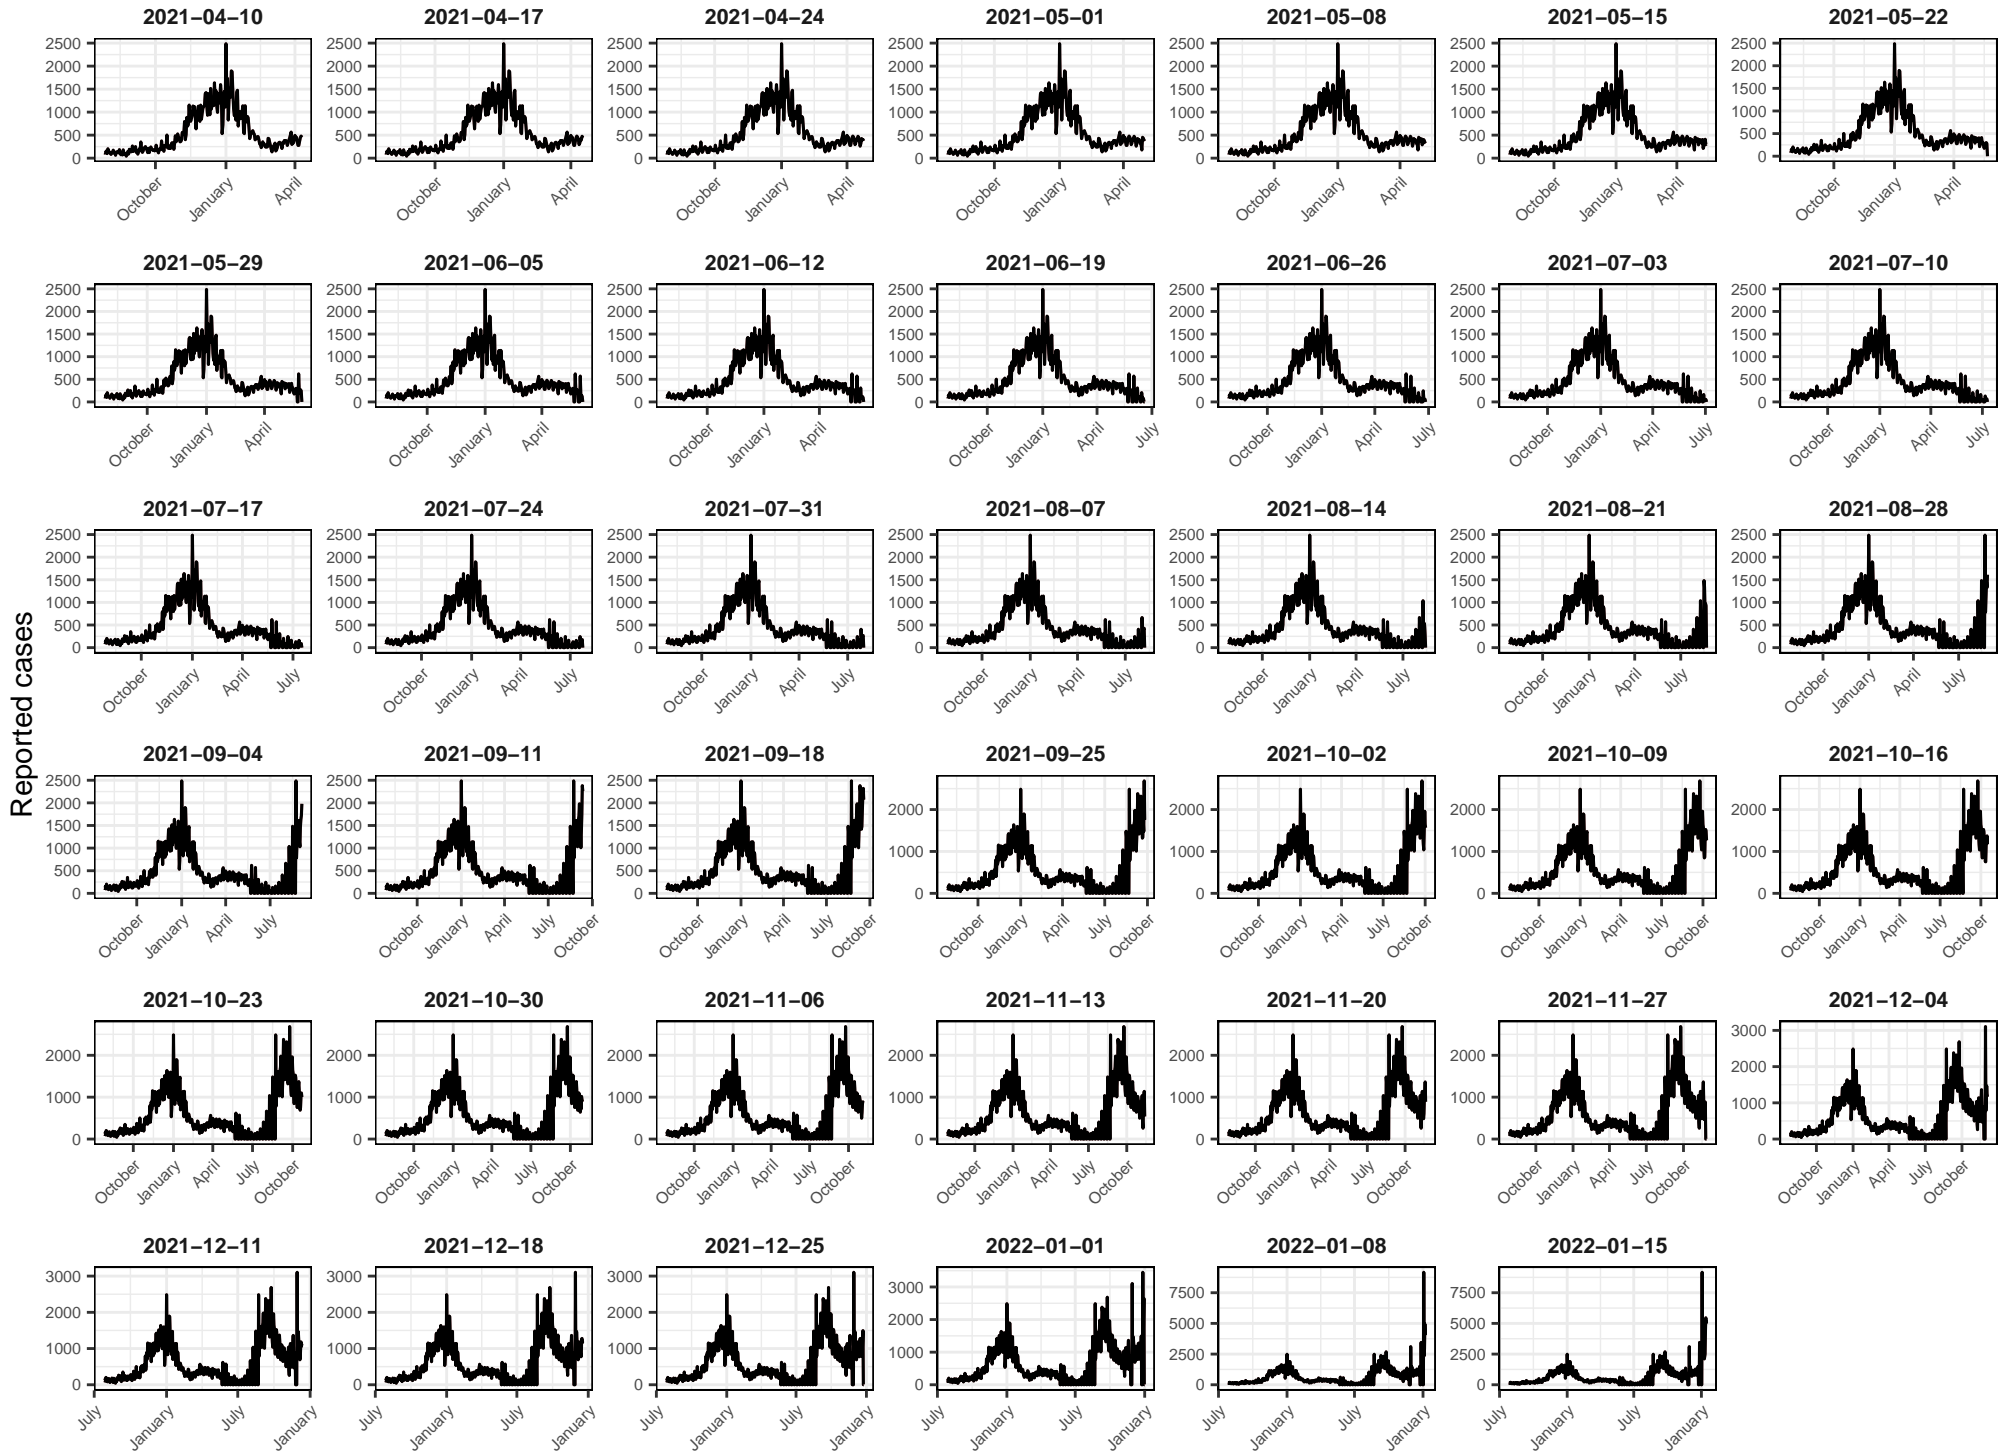

# Wisconsin

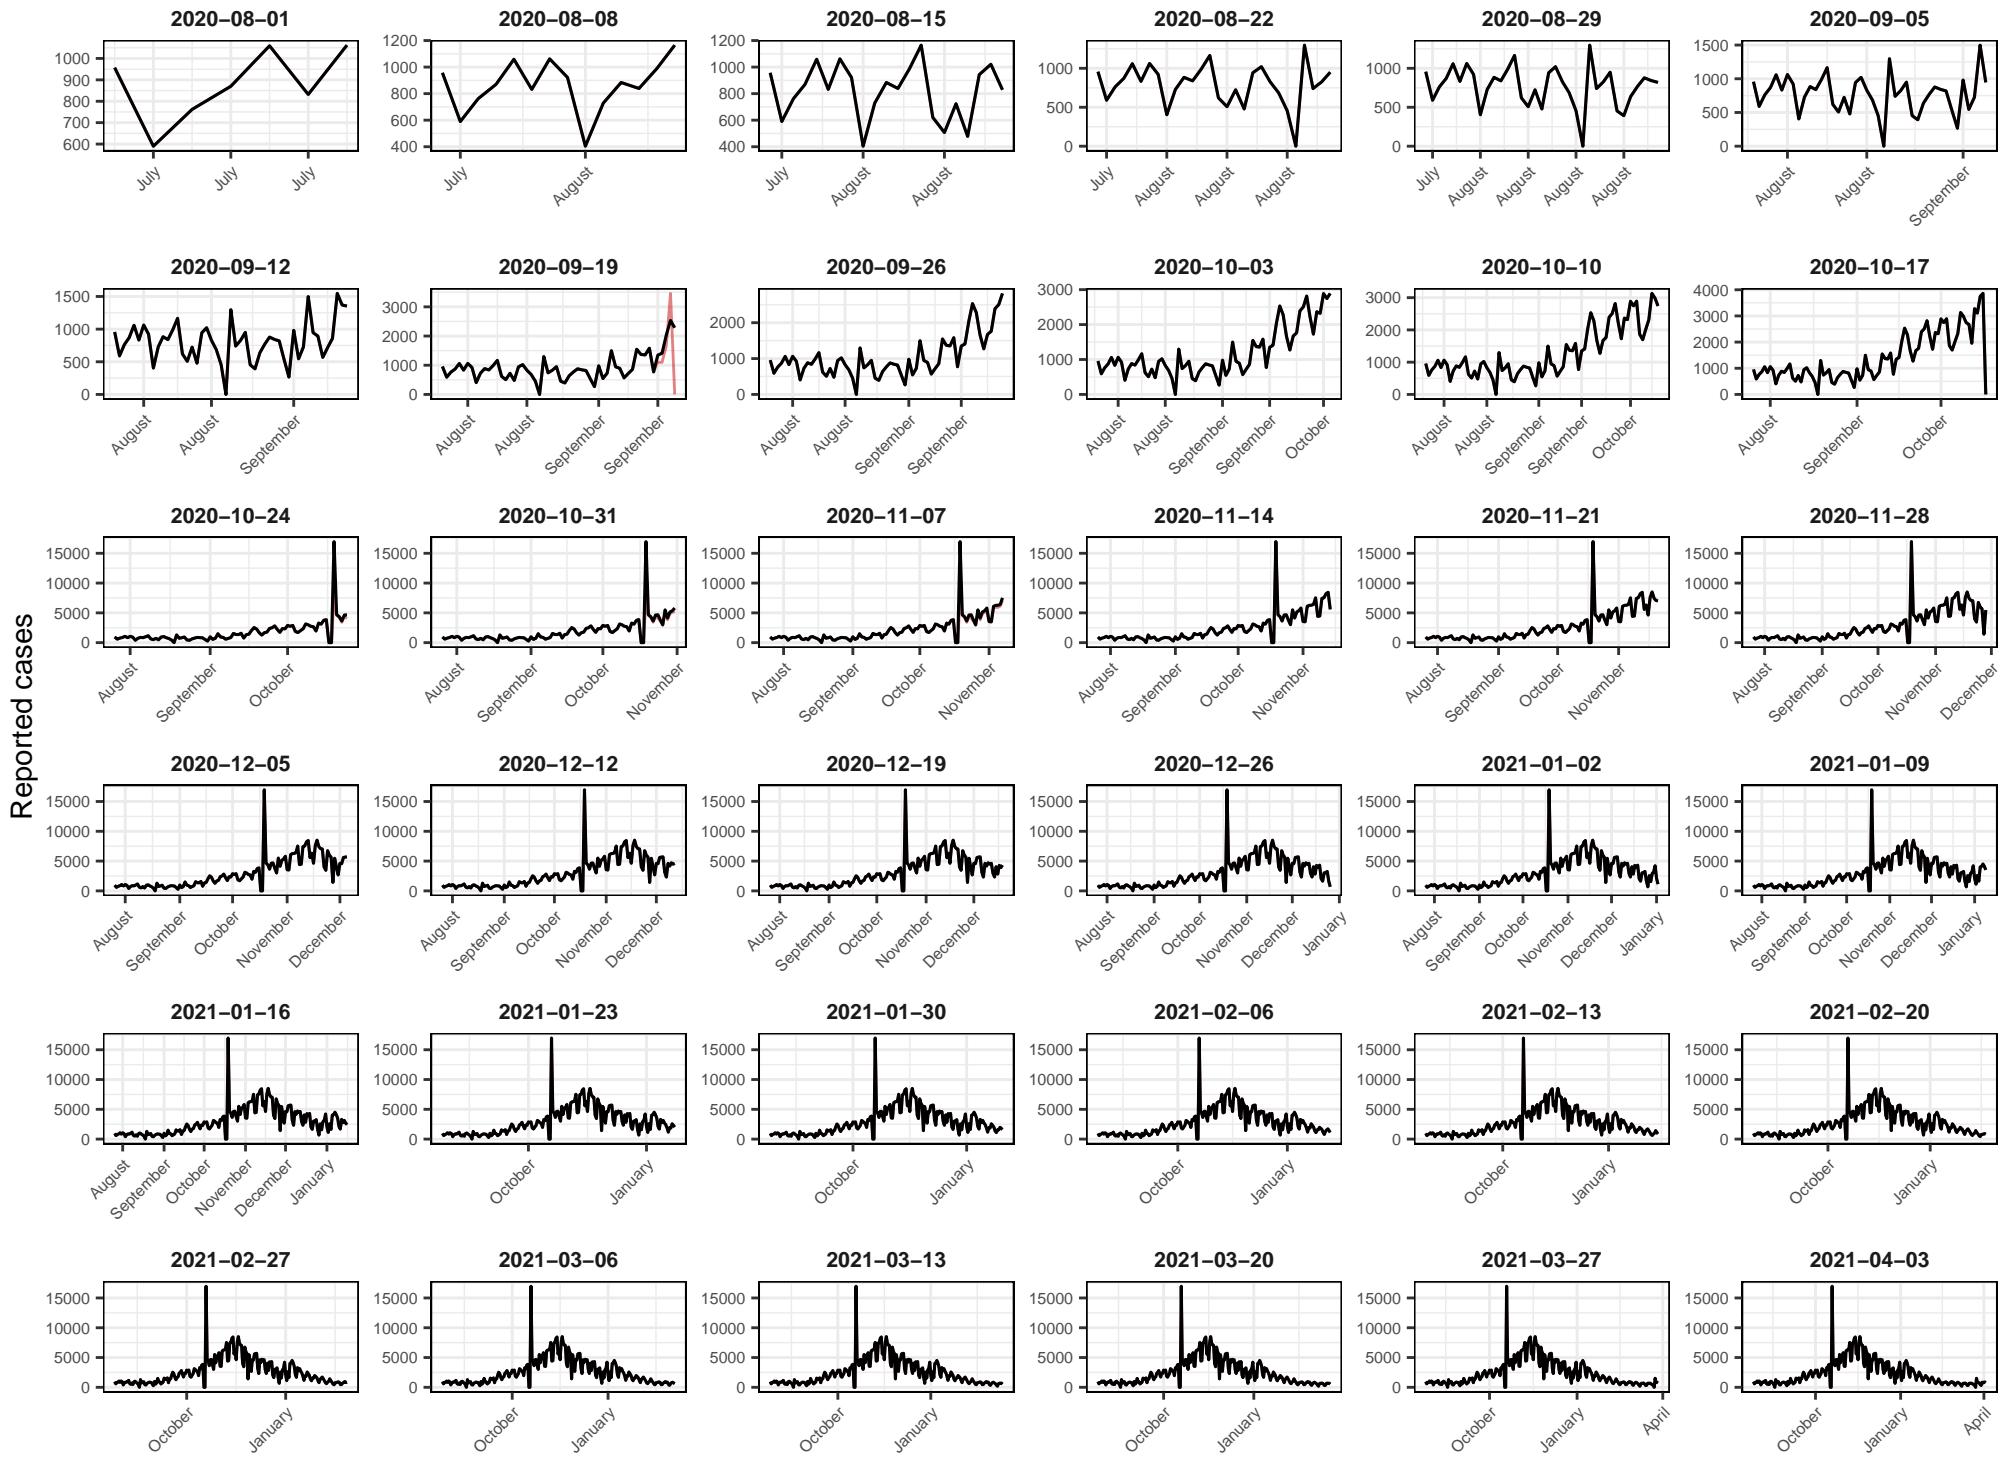

# Wisconsin

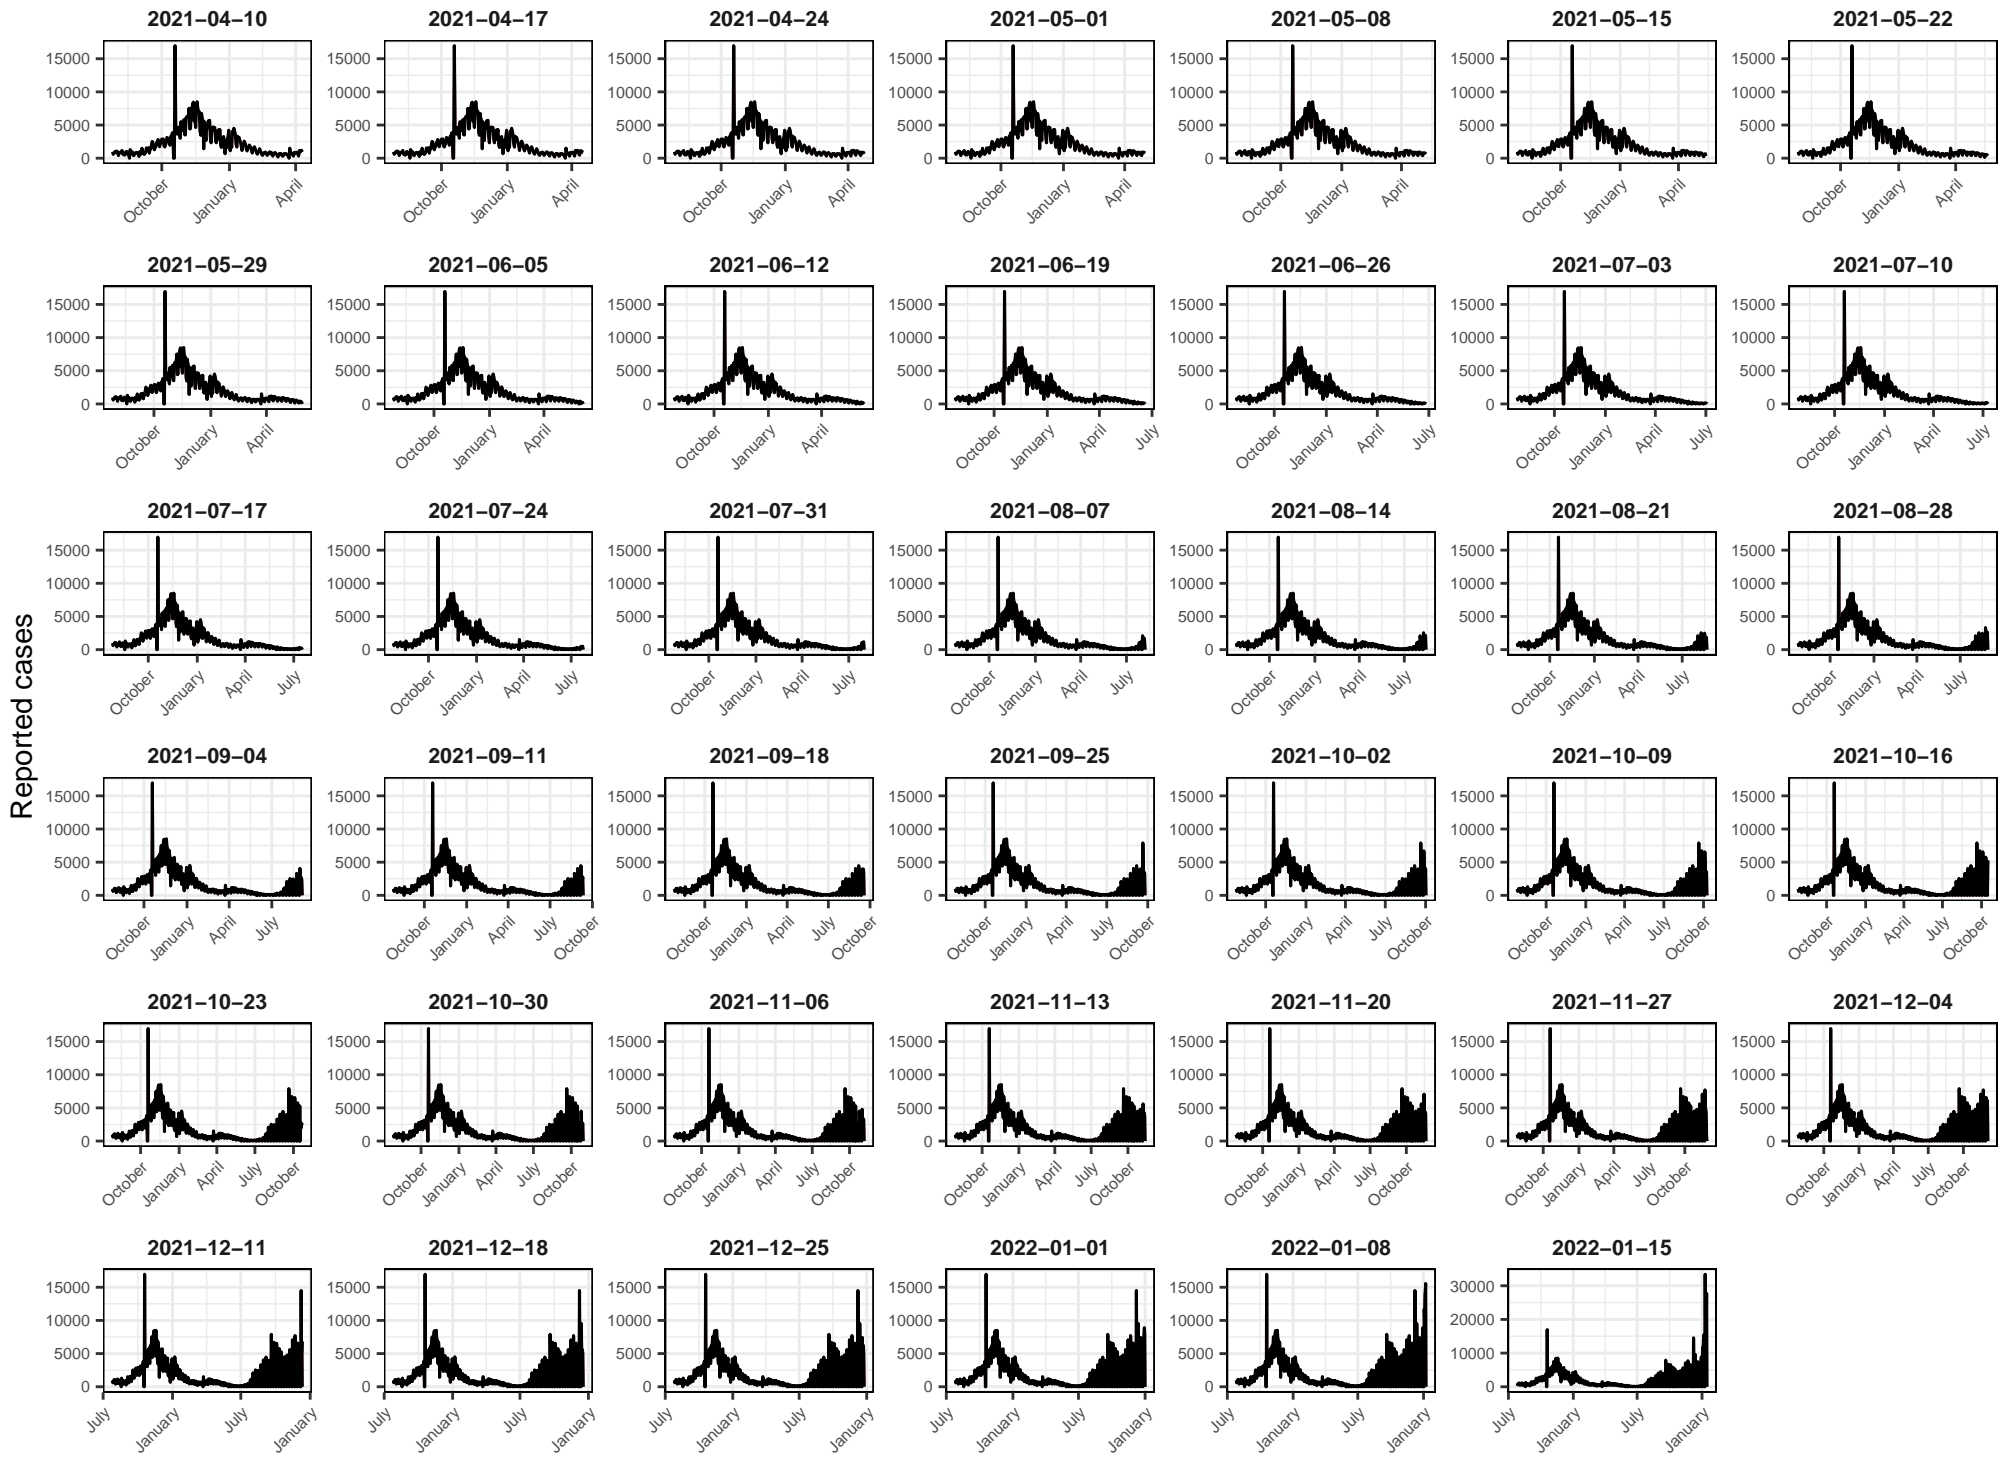

# Wyoming

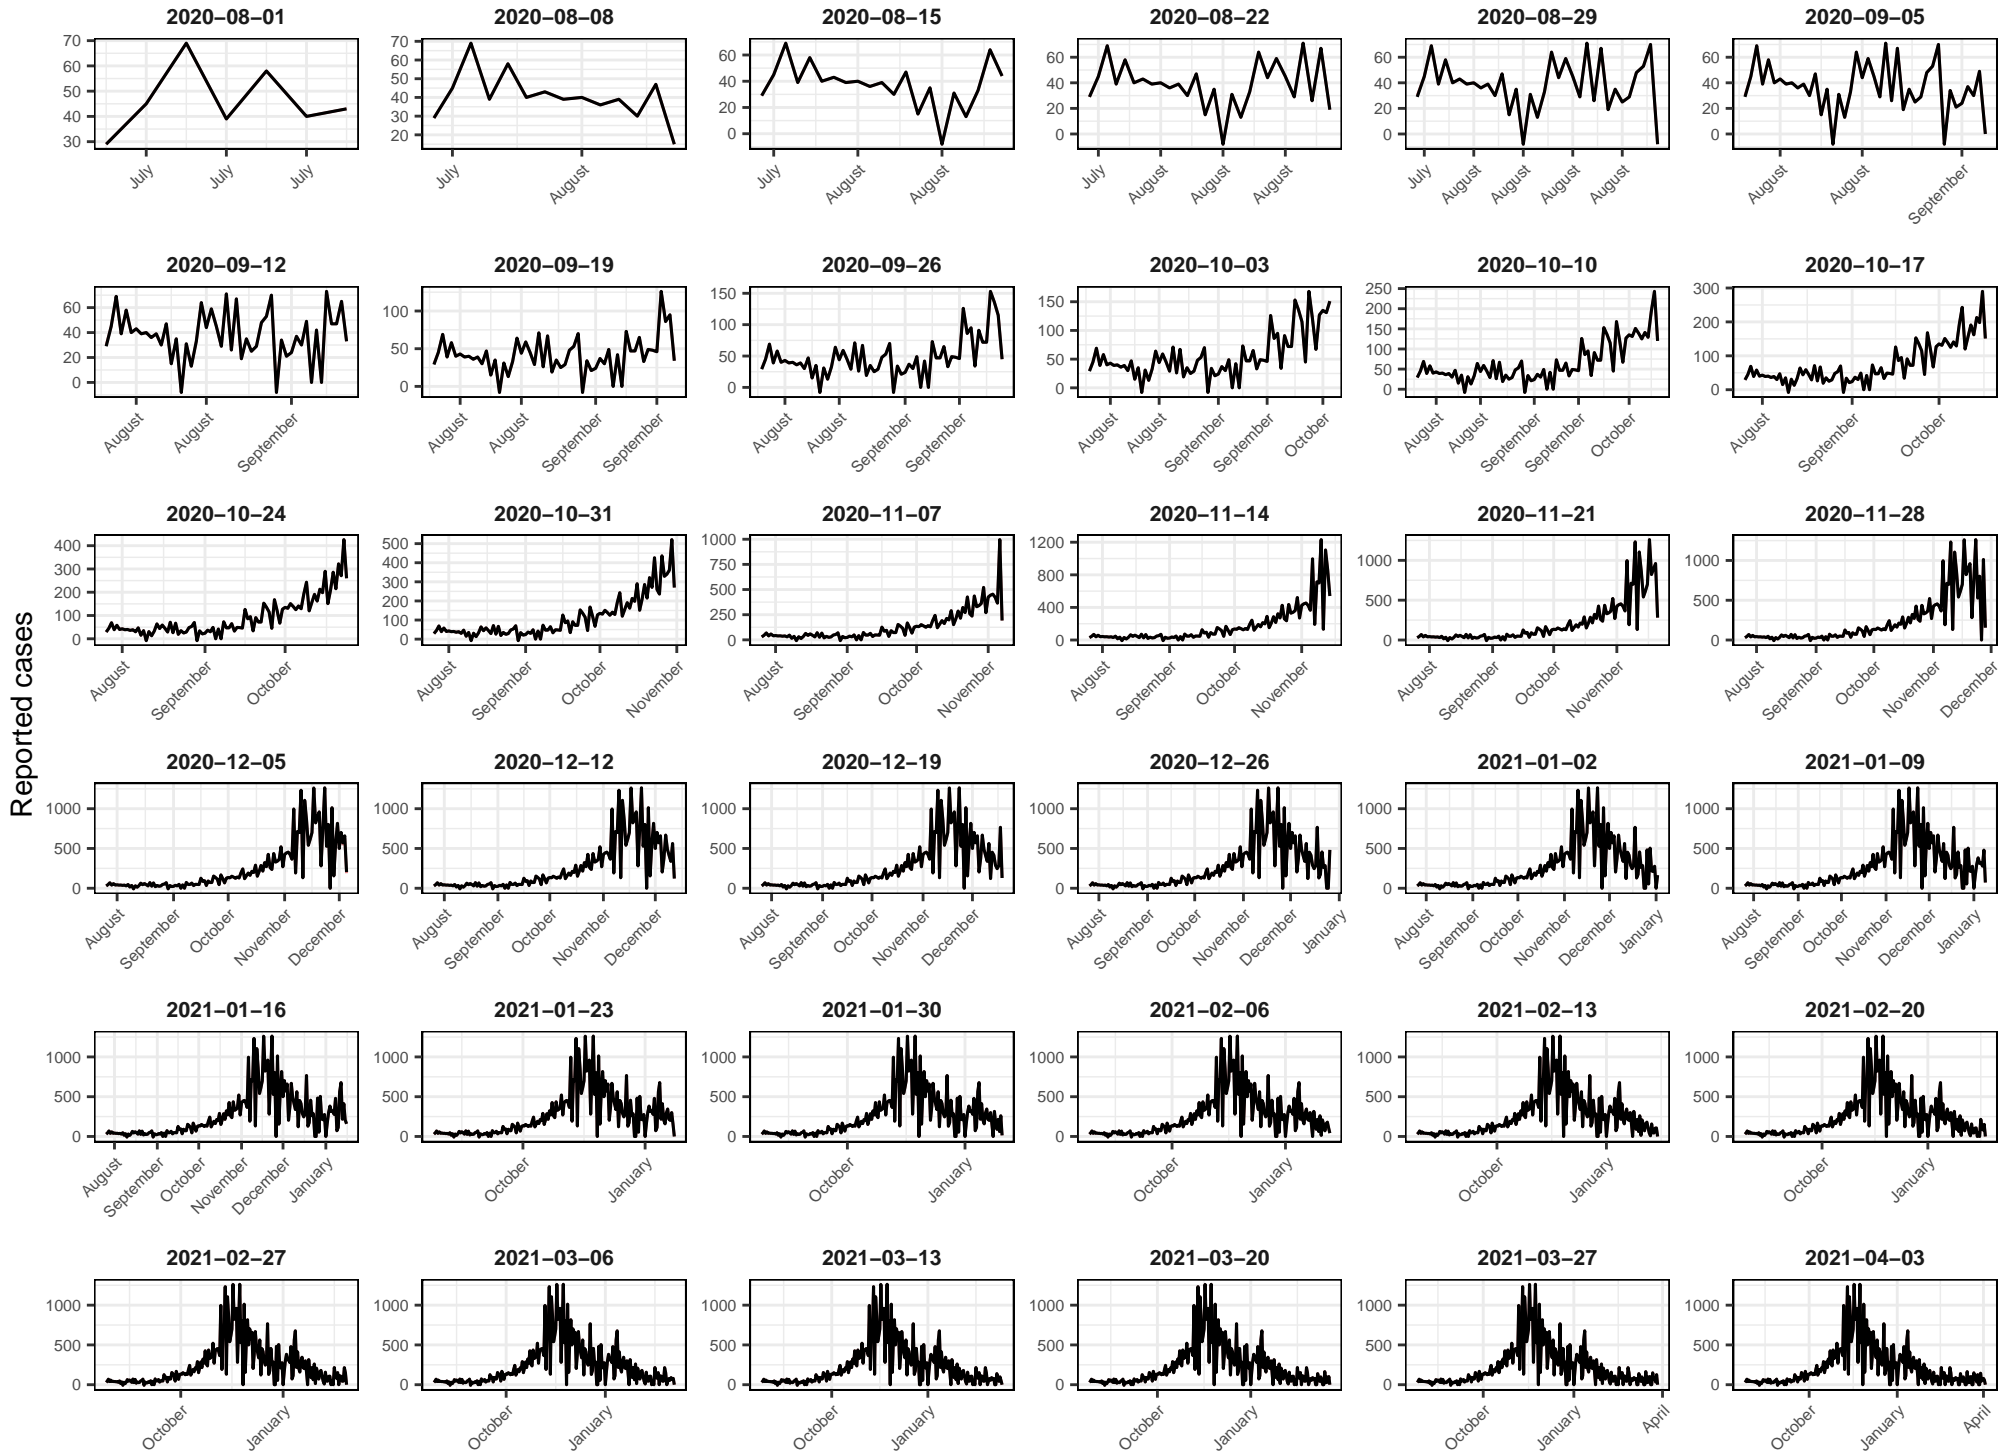

# Wyoming

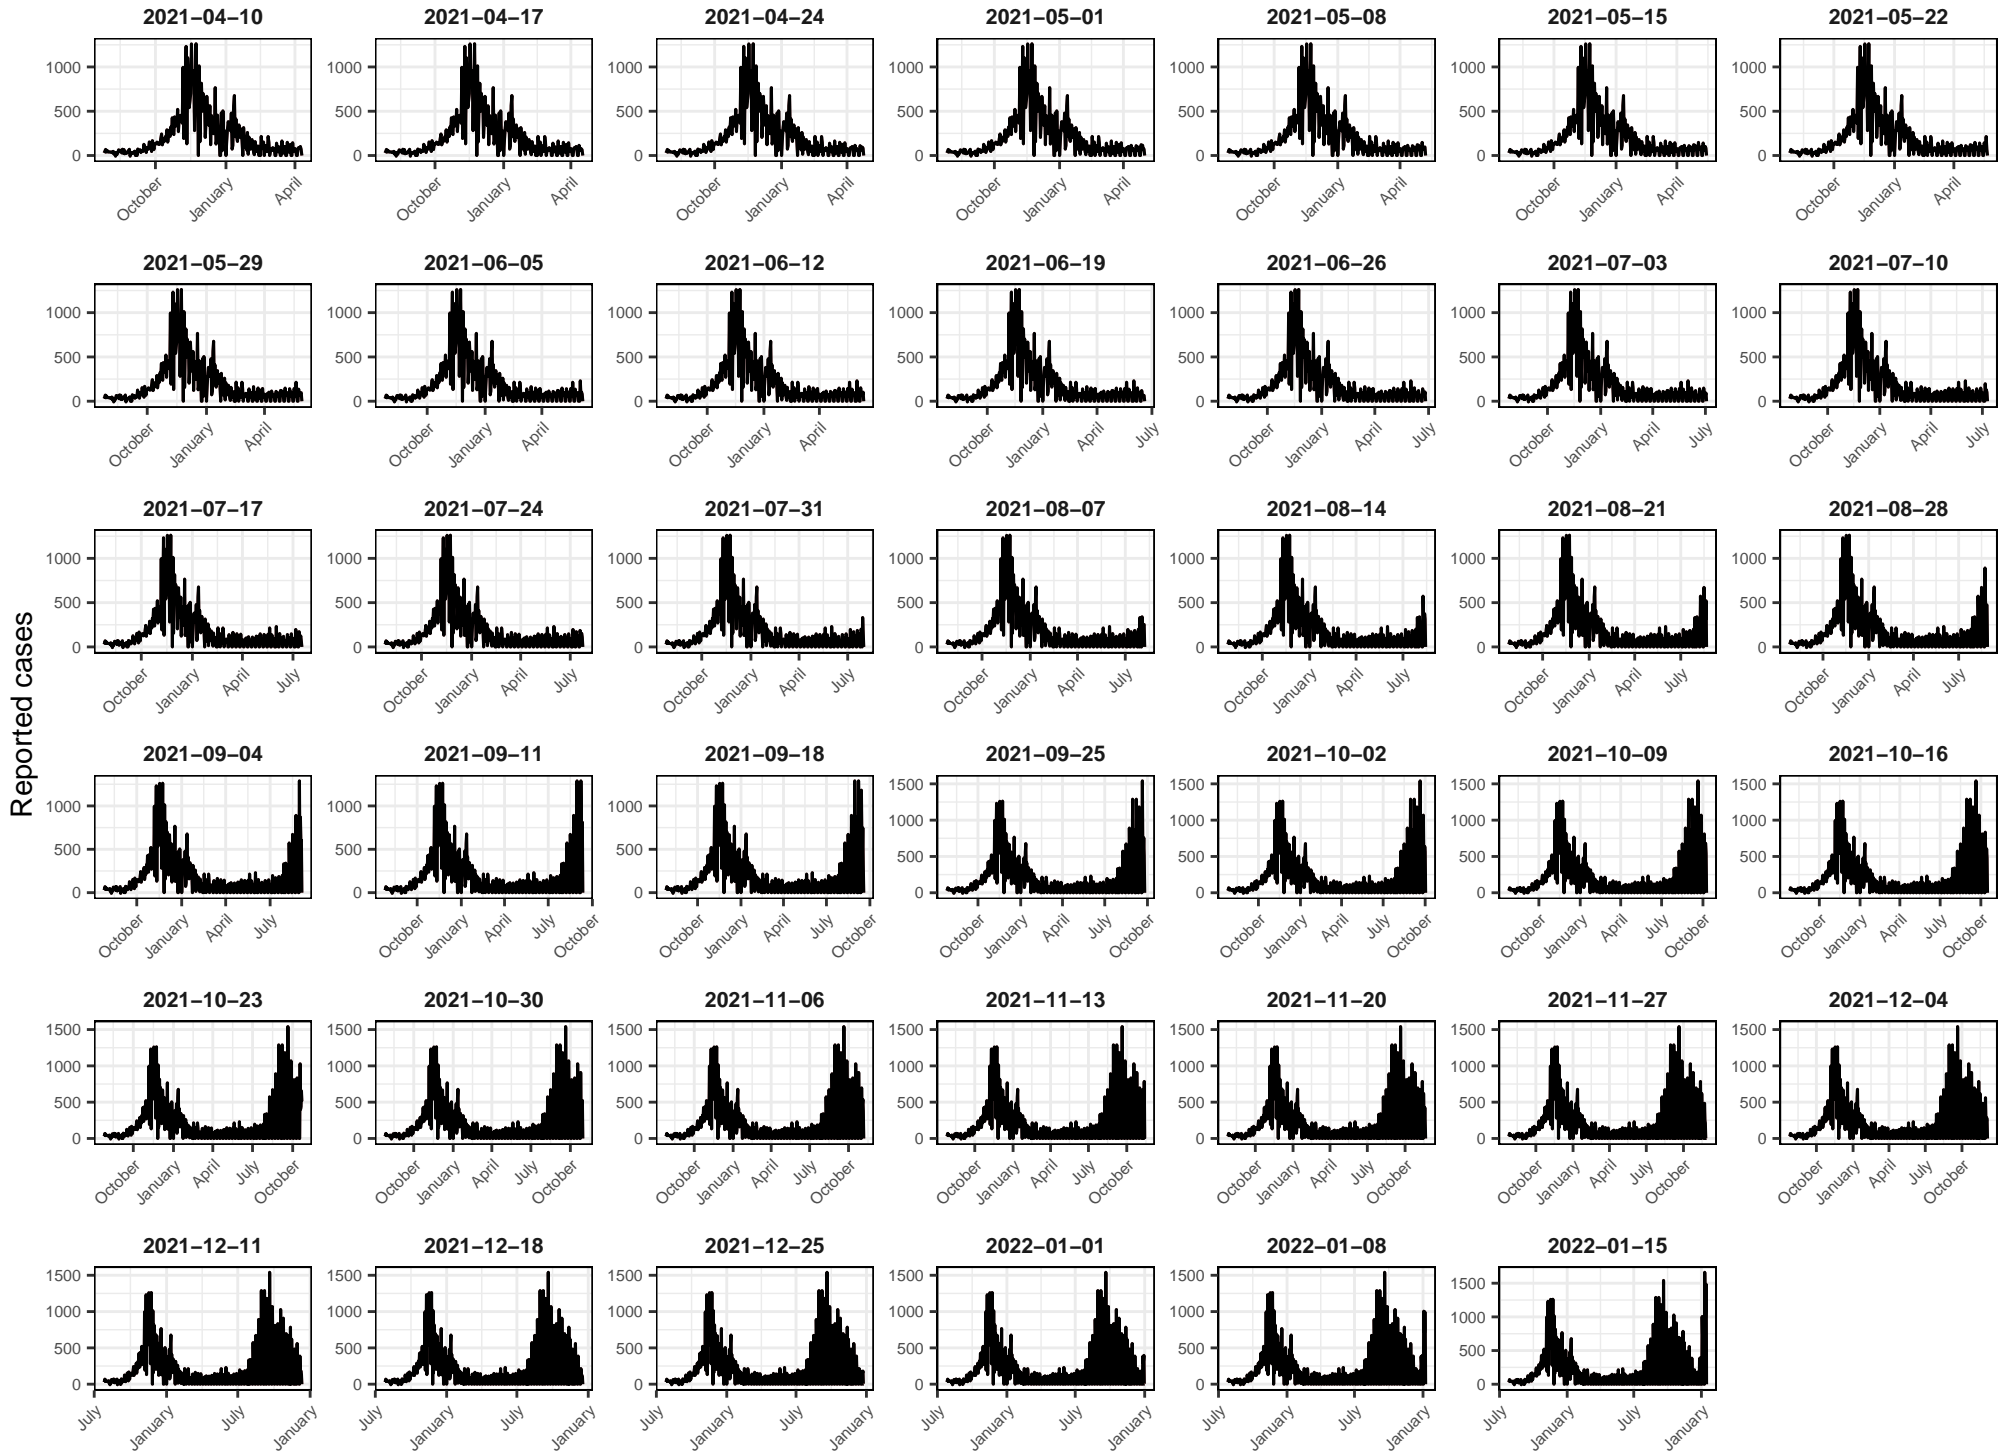

Supplement: Supplementary file [file media-3.pdf]
