# Supplementary material for: Challenges of COVID-19 Case Forecasting in the US, 2020-2021
Source: bioRxiv or medRxiv preprint supplement (doi:10.1101/2023.05.30.23290732), 2023-06-04
Supplement: Supplementary file [file media-5.pdf]

# Alabama

## Rt with 90% CI, w/ phase categories

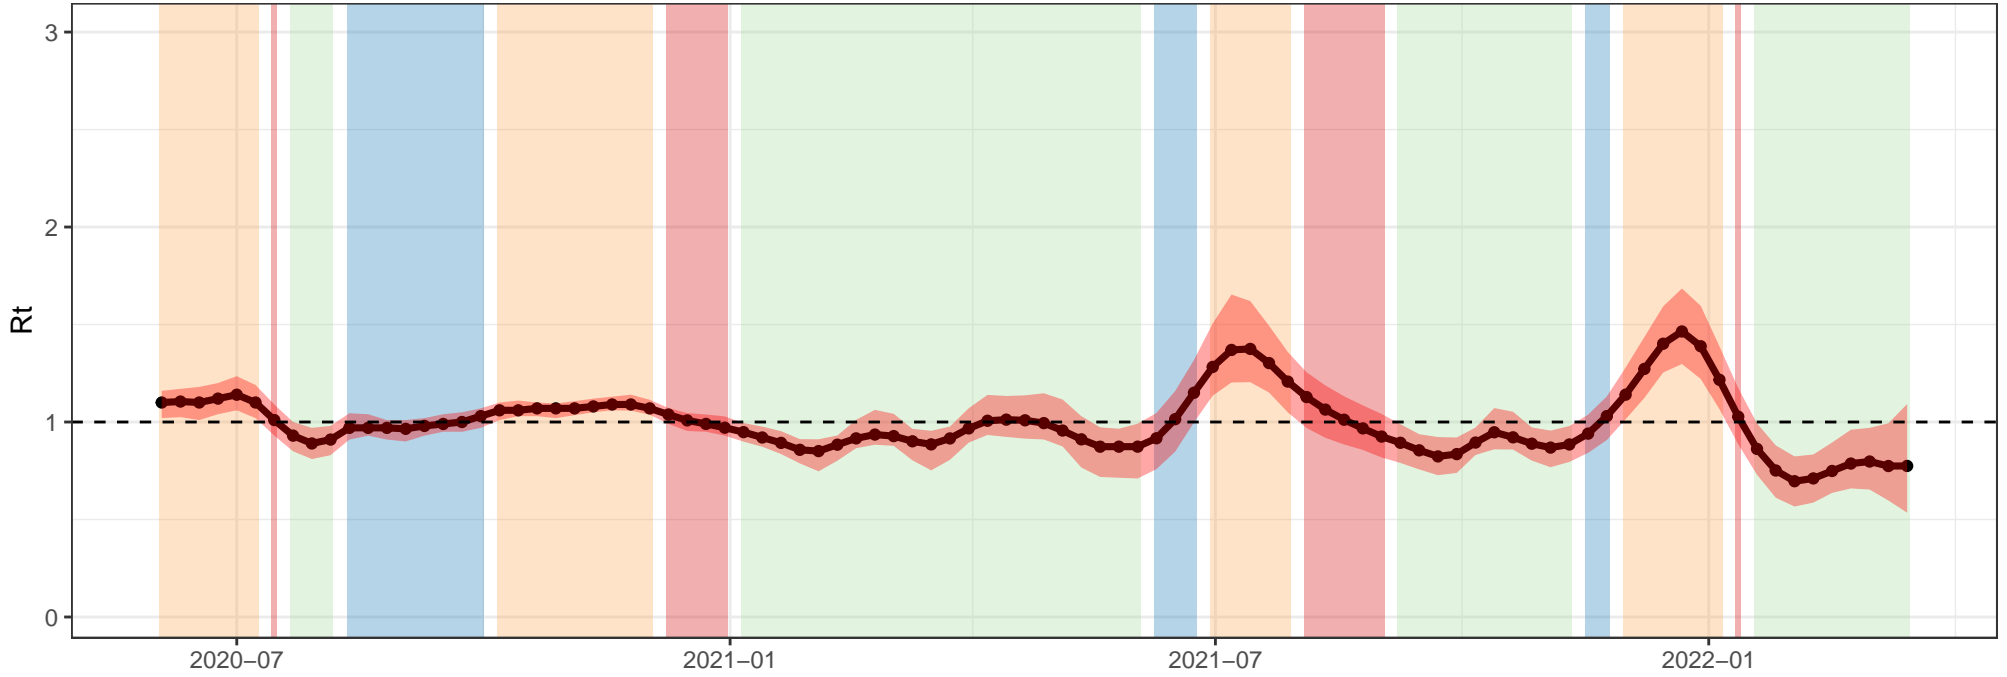

## Case counts w/ lagged phase categories\*

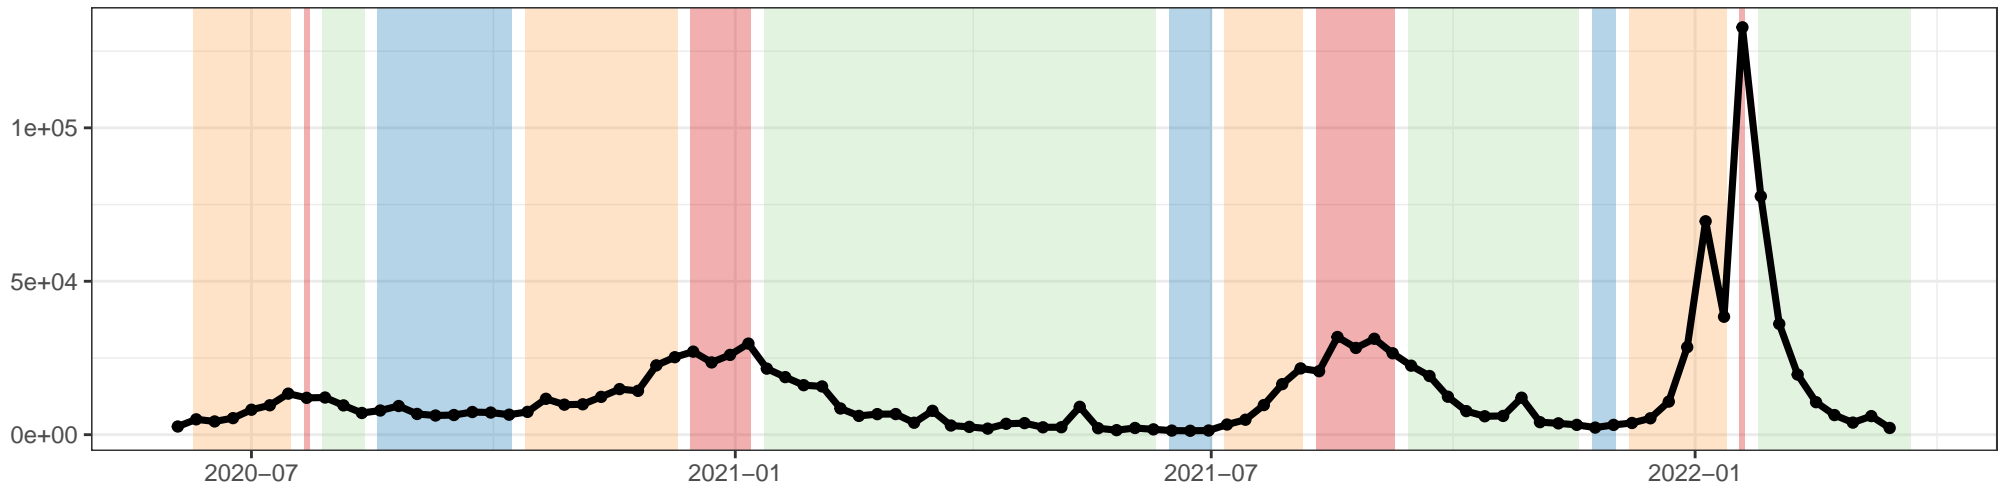

phase    increasing    decreasing    peak    nadir

\*Increasing/decreasing = Rt had a 90% probability  $\geq$  or  $\leq$  than 1.0.  
Wks b/w two increasing/decreasing phases  $\rightarrow$  classified as increasing/decreasing.  
Wks b/w increasing and decreasing phases = peaks; nadirs = wks b/w decreasing and increasing phases.

# Alaska

## Rt with 90% CI, w/ phase categories

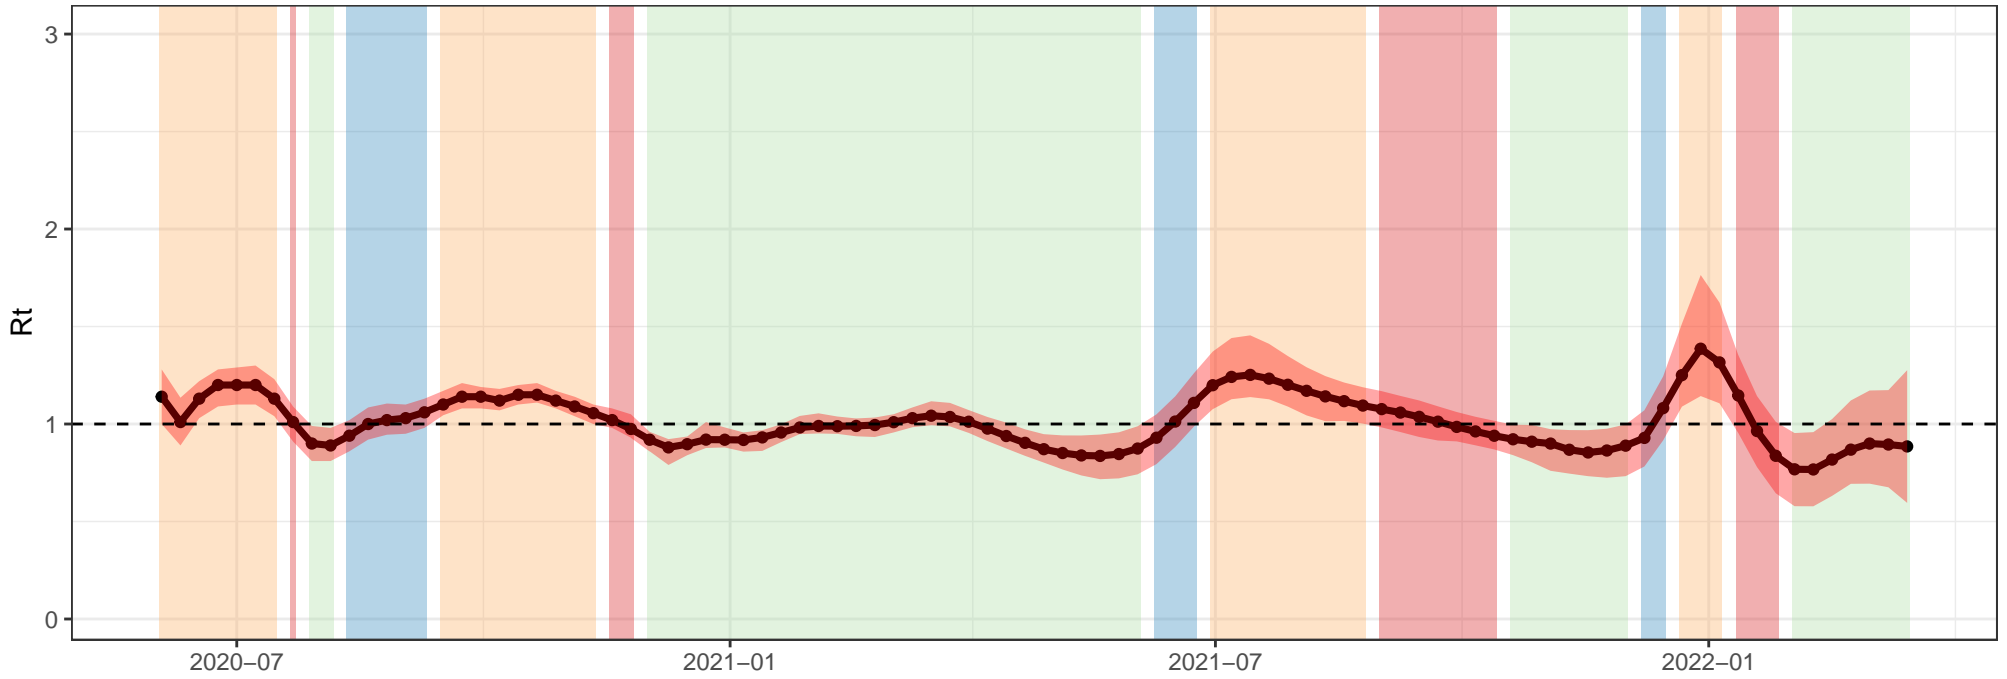

## Case counts w/ lagged phase categories\*

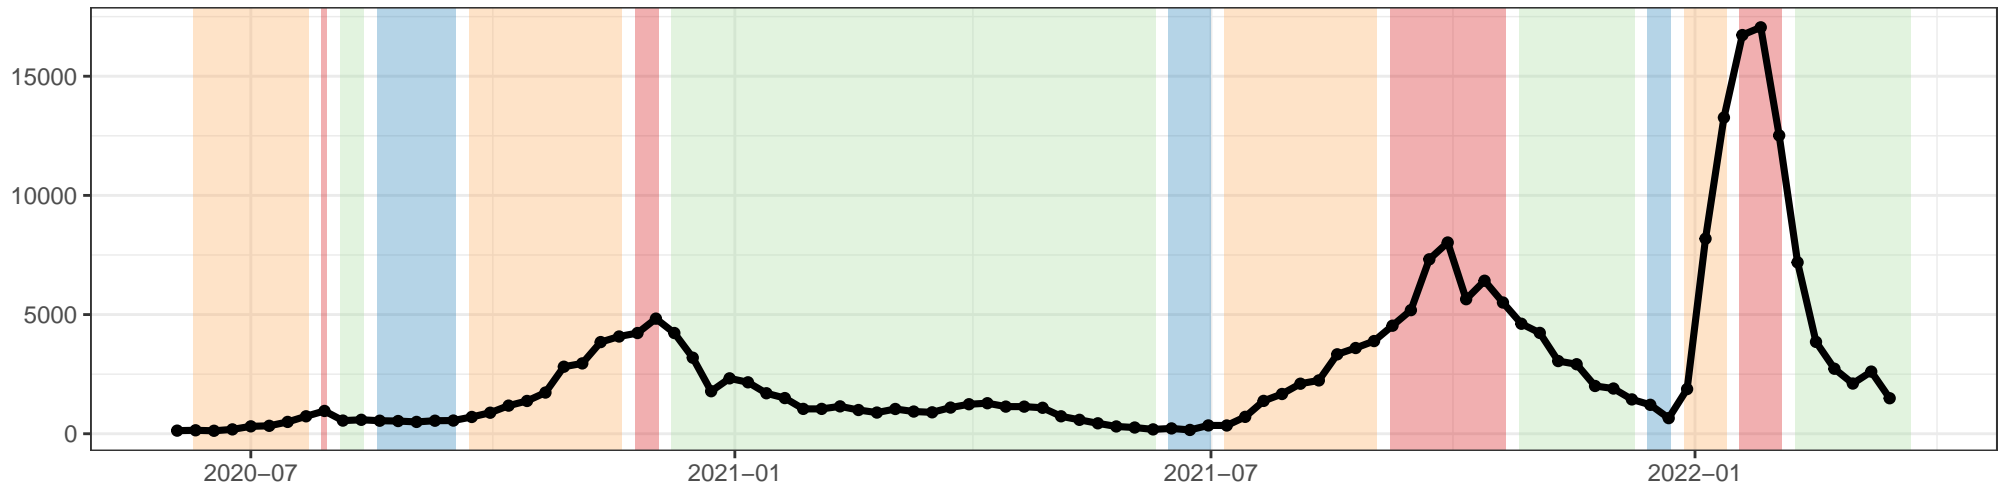

phase    increasing    decreasing    peak    nadir

\*Increasing/decreasing = Rt had a 90% probability  $\geq$  or  $\leq$  than 1.0.  
Wks b/w two increasing/decreasing phases  $\rightarrow$  classified as increasing/decreasing.  
Wks b/w increasing and decreasing phases = peaks; nadirs = wks b/w decreasing and increasing phases.

# Arizona

## Rt with 90% CI, w/ phase categories

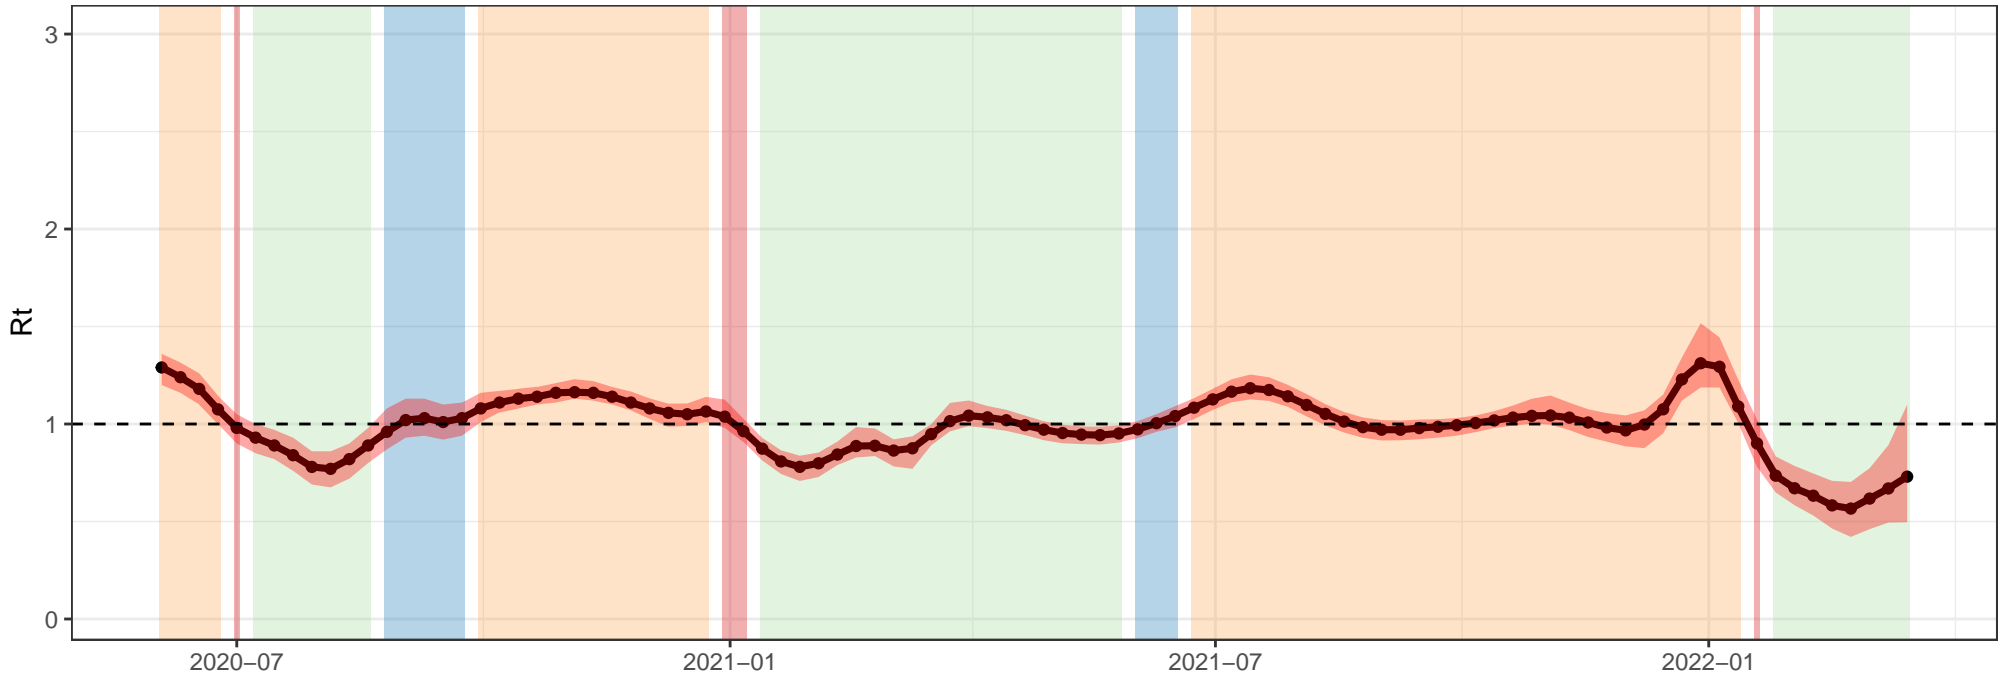

## Case counts w/ lagged phase categories\*

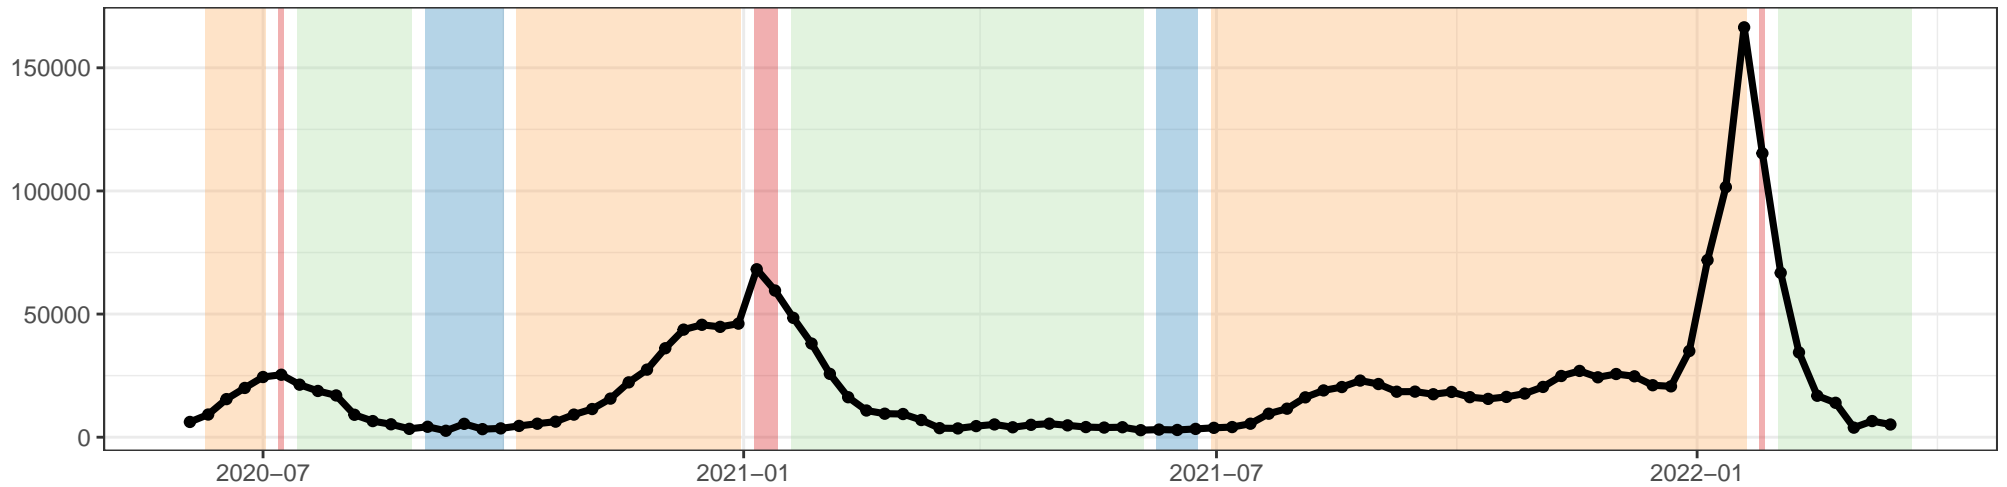

phase    increasing    decreasing    peak    nadir

\*Increasing/decreasing = Rt had a 90% probability  $\geq$  or  $\leq$  than 1.0.  
Wks b/w two increasing/decreasing phases  $\rightarrow$  classified as increasing/decreasing.  
Wks b/w increasing and decreasing phases = peaks; nadirs = wks b/w decreasing and increasing phases.

# Arkansas

## Rt with 90% CI, w/ phase categories

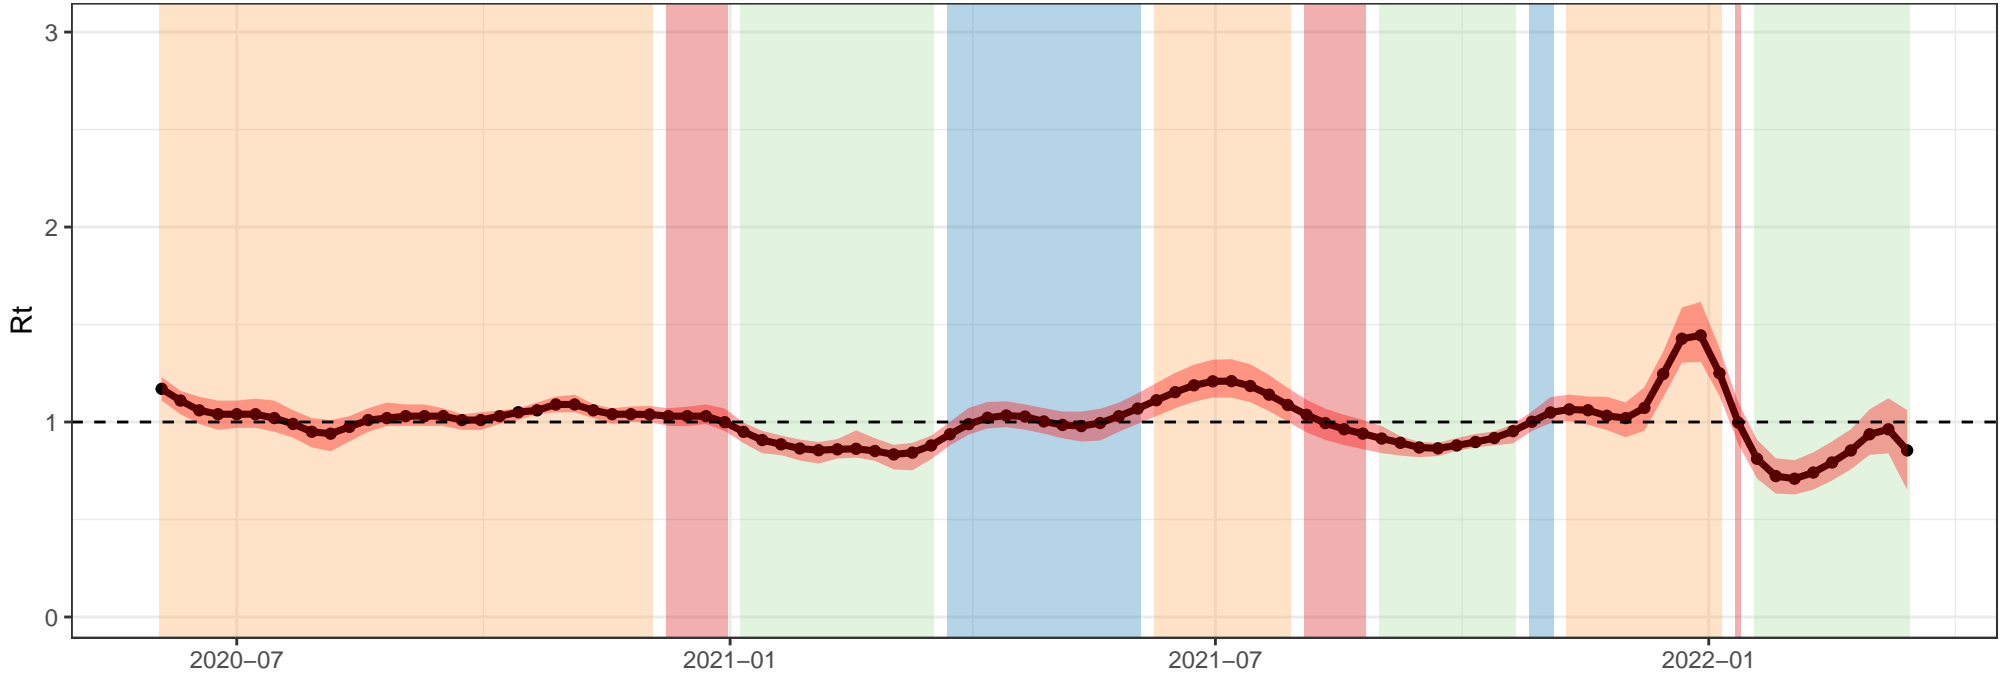

## Case counts w/ lagged phase categories\*

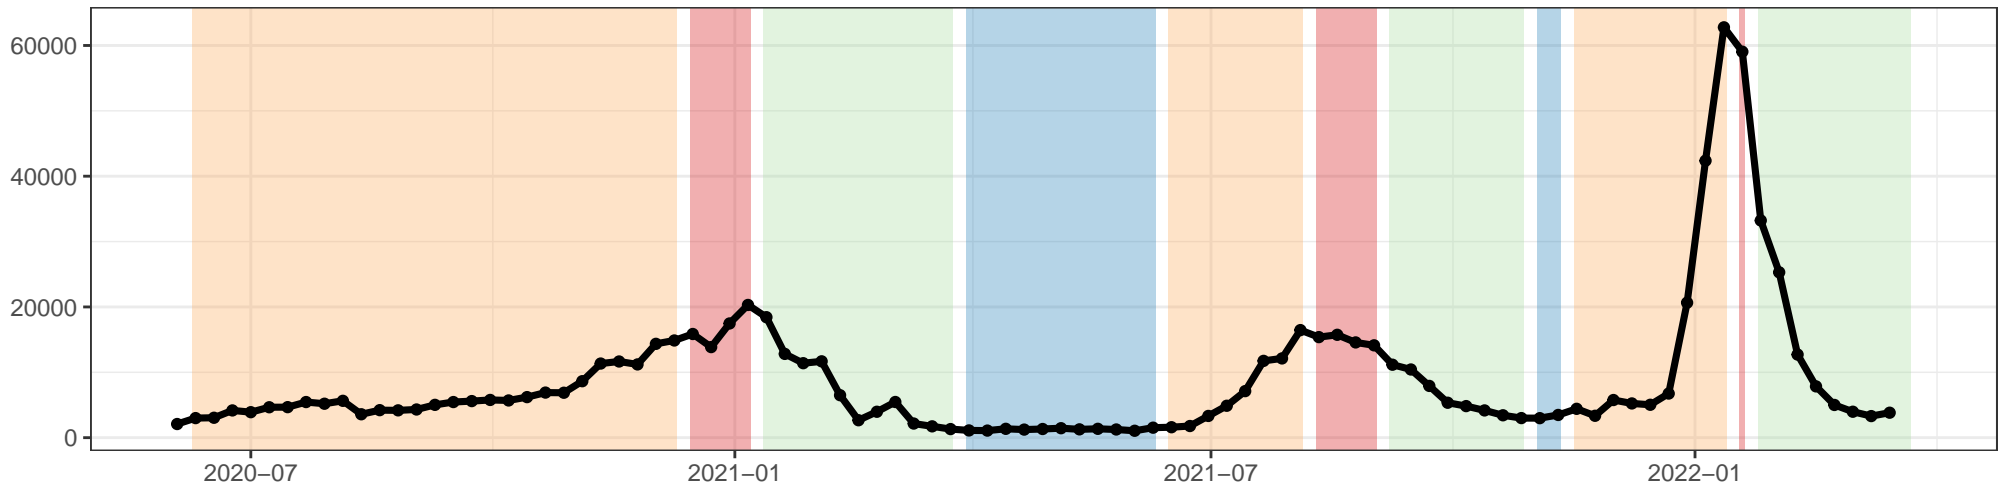

phase    increasing    decreasing    peak    nadir

\*Increasing/decreasing = Rt had a 90% probability  $\geq$  or  $\leq$  than 1.0.  
Wks b/w two increasing/decreasing phases  $\rightarrow$  classified as increasing/decreasing.  
Wks b/w increasing and decreasing phases = peaks; nadirs = wks b/w decreasing and increasing phases.

# California

## Rt with 90% CI, w/ phase categories

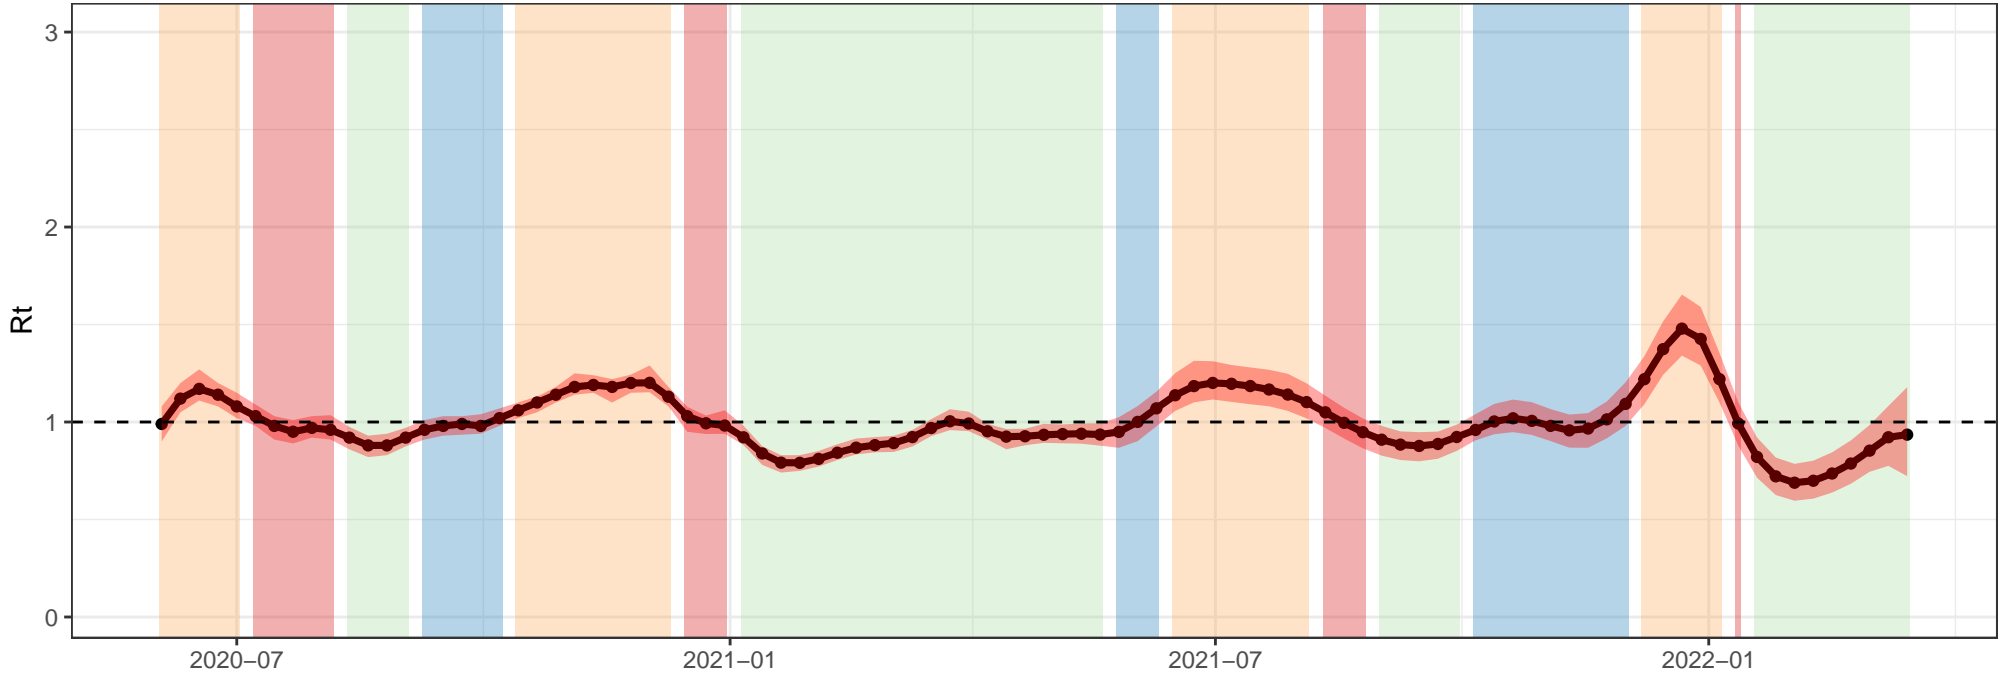

## Case counts w/ lagged phase categories\*

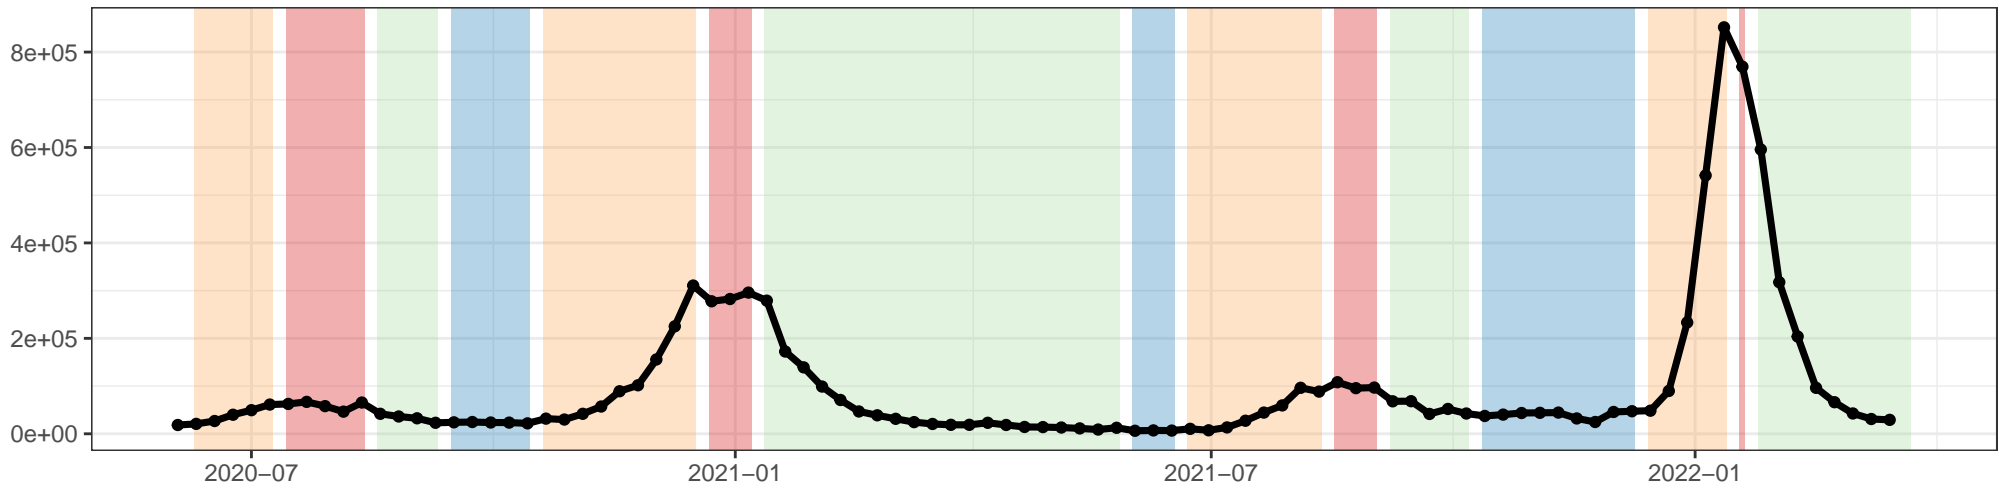

phase    increasing    decreasing    peak    nadir

\*Increasing/decreasing = Rt had a 90% probability  $\geq$  or  $\leq$  than 1.0.  
Wks b/w two increasing/decreasing phases  $\rightarrow$  classified as increasing/decreasing.  
Wks b/w increasing and decreasing phases = peaks; nadirs = wks b/w decreasing and increasing phases.

# Colorado

## Rt with 90% CI, w/ phase categories

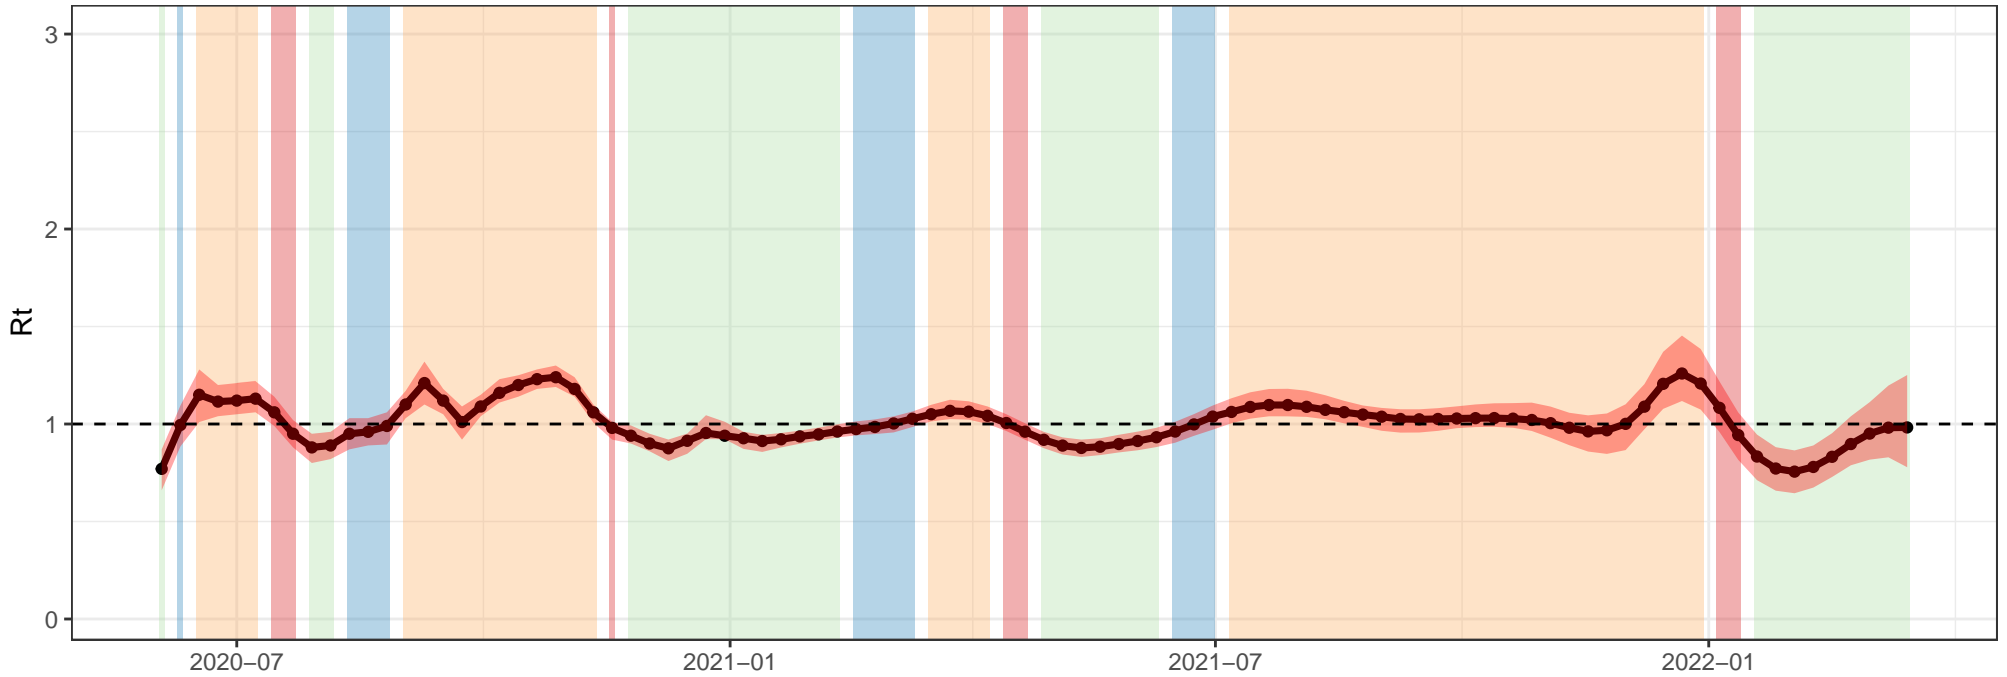

## Case counts w/ lagged phase categories\*

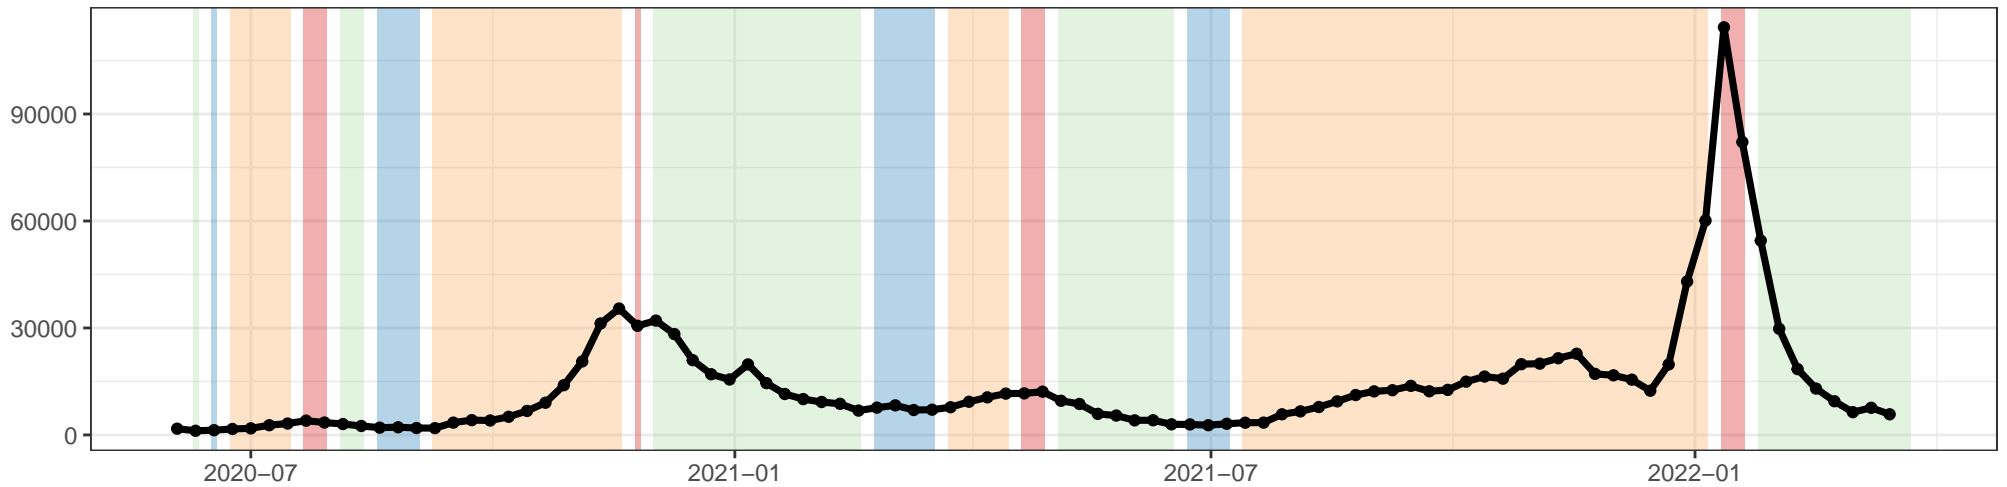

phase    increasing    decreasing    peak    nadir

\*Increasing/decreasing = Rt had a 90% probability  $\geq$  or  $\leq$  than 1.0.  
Wks b/w two increasing/decreasing phases  $\rightarrow$  classified as increasing/decreasing.  
Wks b/w increasing and decreasing phases = peaks; nadirs = wks b/w decreasing and increasing phases.

# Connecticut

## Rt with 90% CI, w/ phase categories

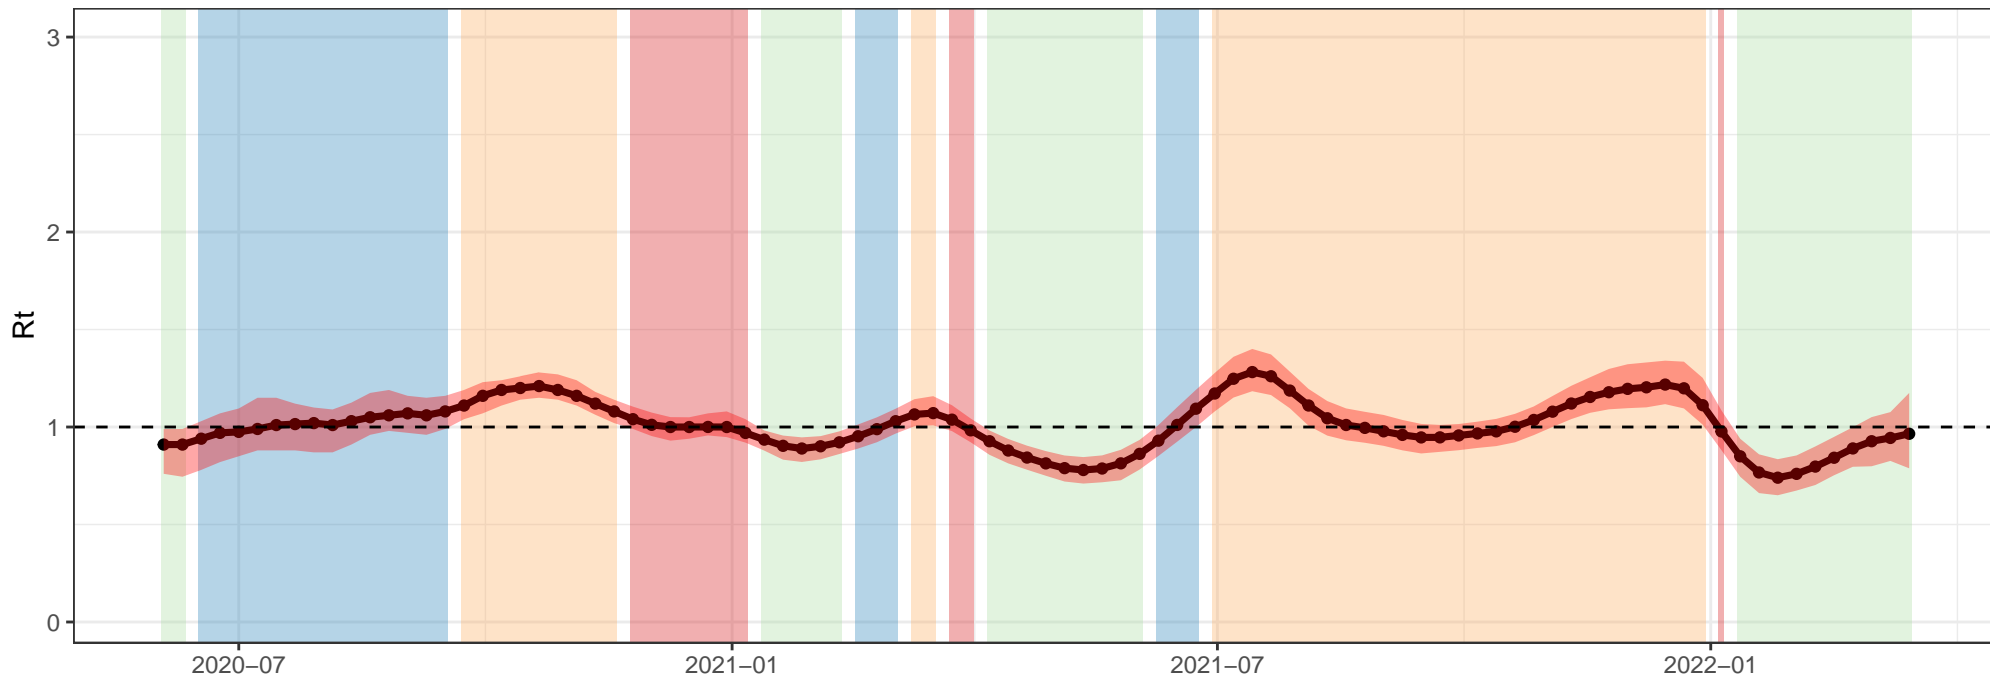

## Case counts w/ lagged phase categories\*

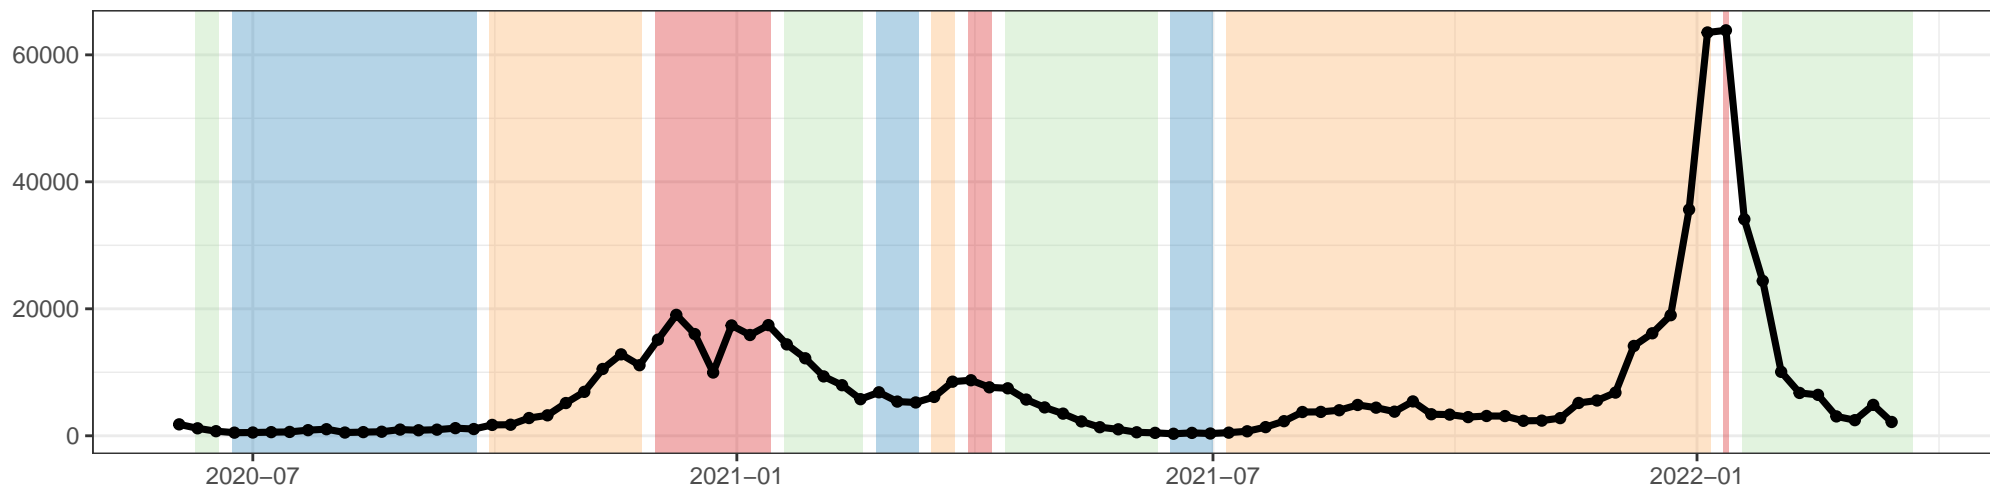

phase    increasing    decreasing    peak    nadir

\*Increasing/decreasing = Rt had a 90% probability  $\geq$  or  $\leq$  than 1.0.  
Wks b/w two increasing/decreasing phases  $\rightarrow$  classified as increasing/decreasing.  
Wks b/w increasing and decreasing phases = peaks; nadirs = wks b/w decreasing and increasing phases.

# Delaware

## Rt with 90% CI, w/ phase categories

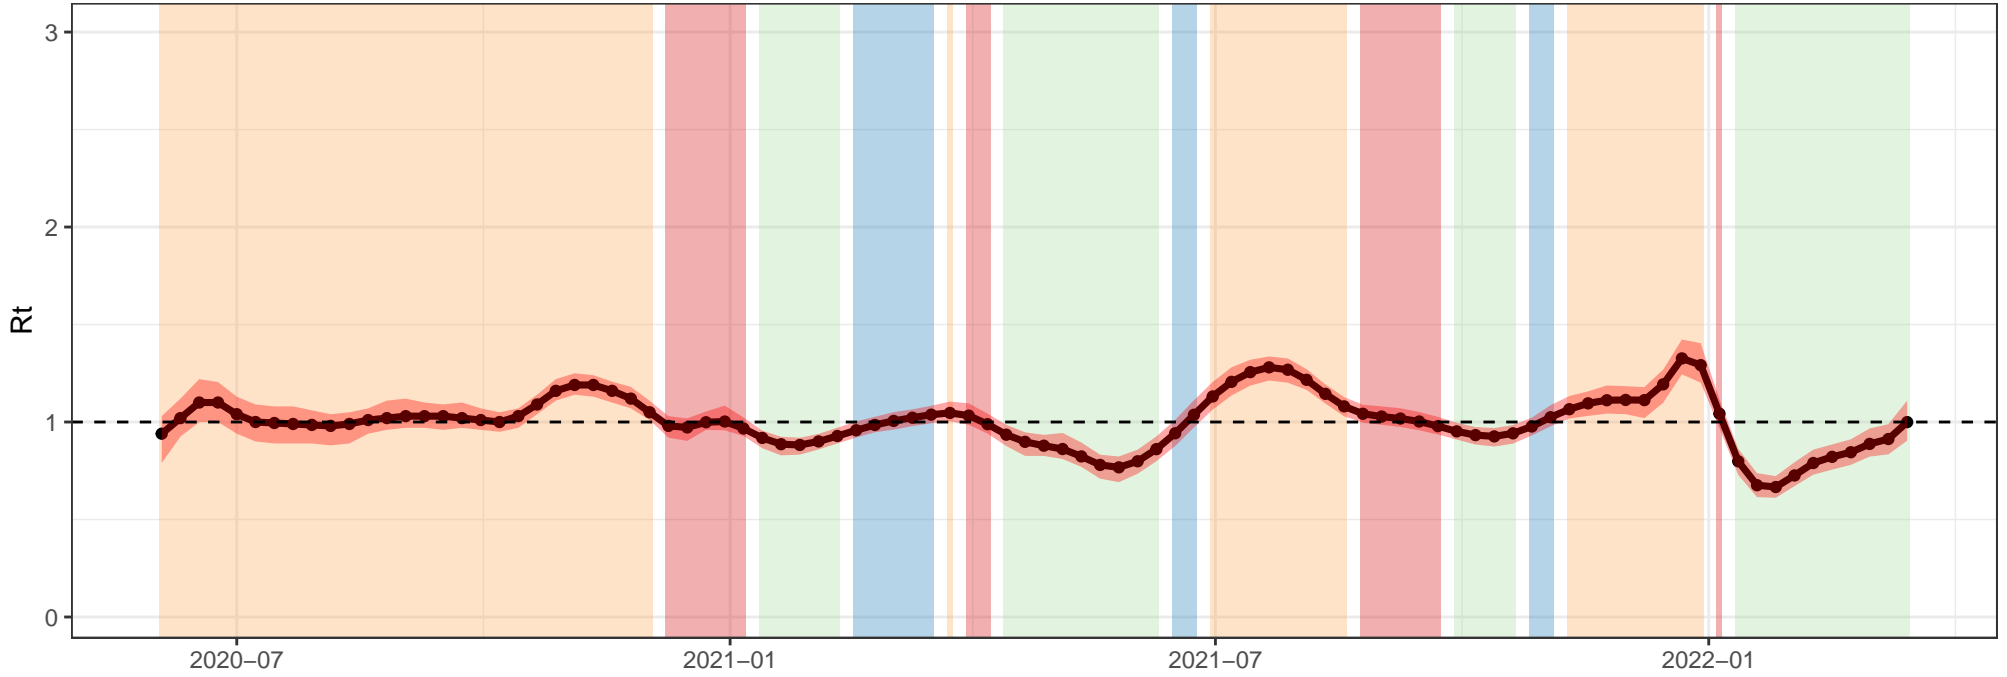

## Case counts w/ lagged phase categories\*

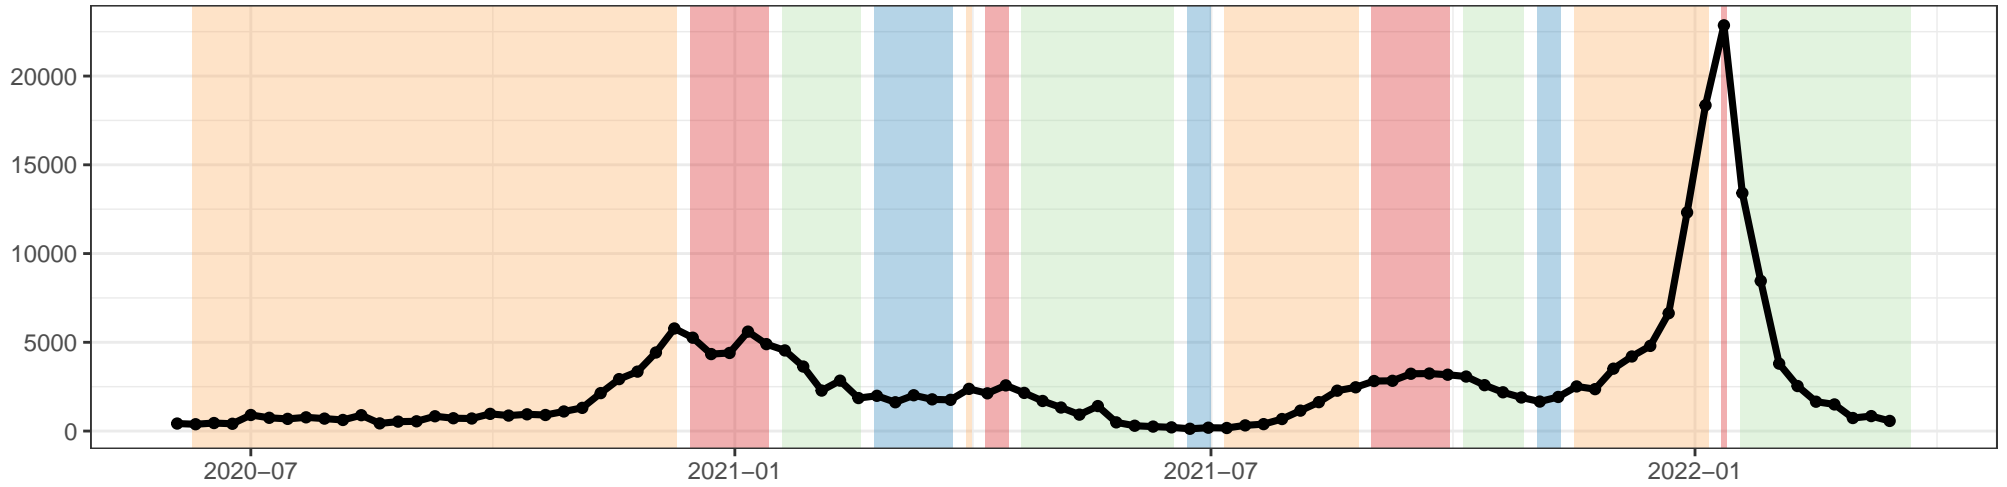

phase    increasing    decreasing    peak    nadir

\*Increasing/decreasing = Rt had a 90% probability  $\geq$  or  $\leq$  than 1.0.  
Wks b/w two increasing/decreasing phases  $\rightarrow$  classified as increasing/decreasing.  
Wks b/w increasing and decreasing phases = peaks; nadirs = wks b/w decreasing and increasing phases.



# Florida

Rt with 90% CI, w/ phase categories

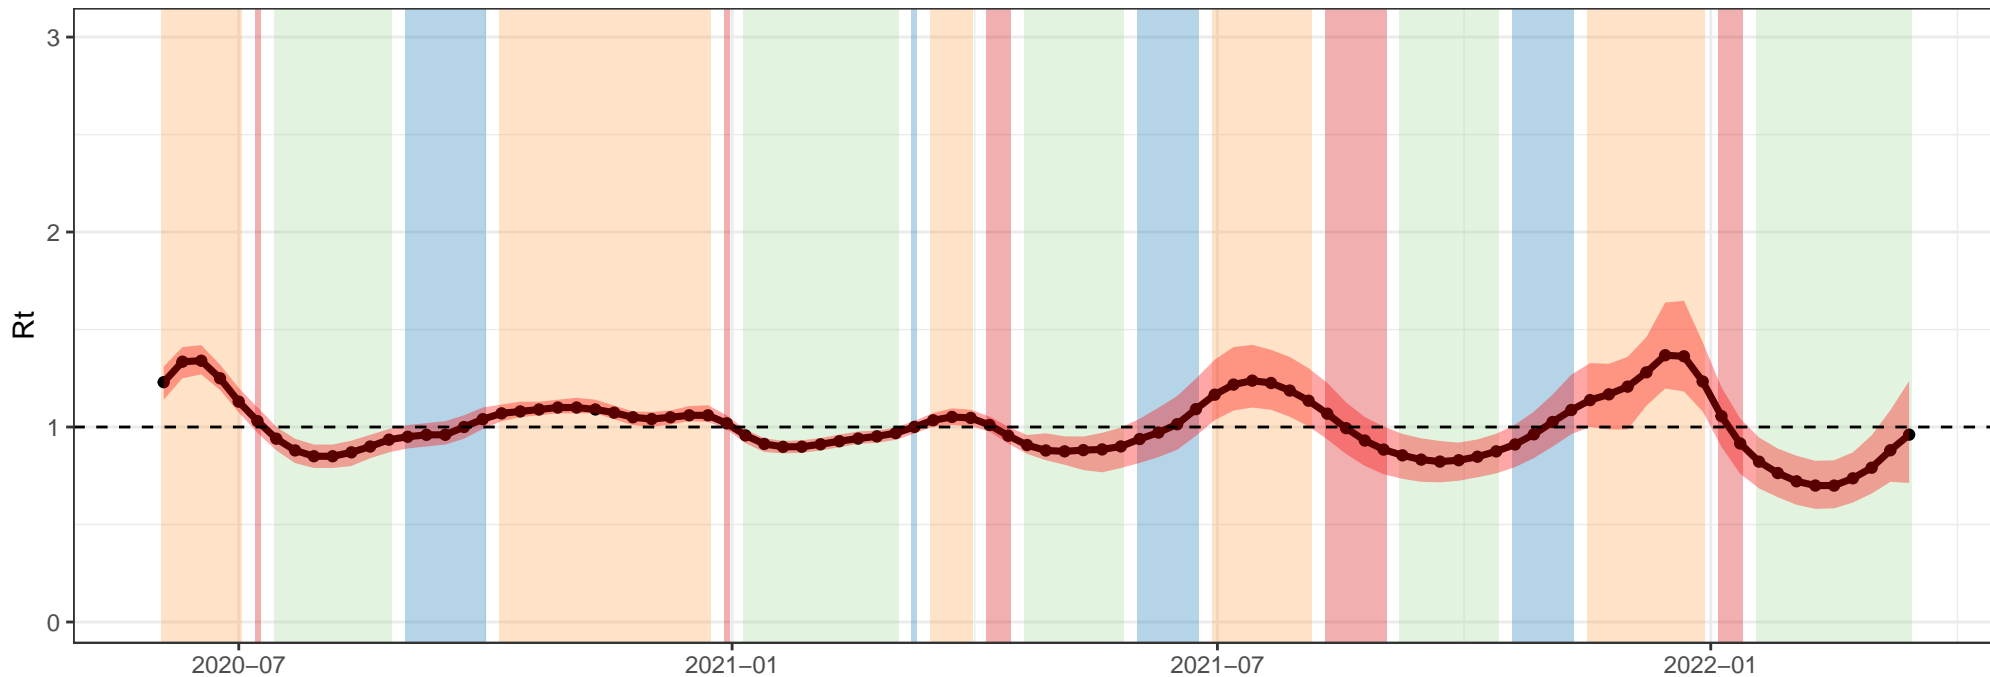

Case counts w/ lagged phase categories\*

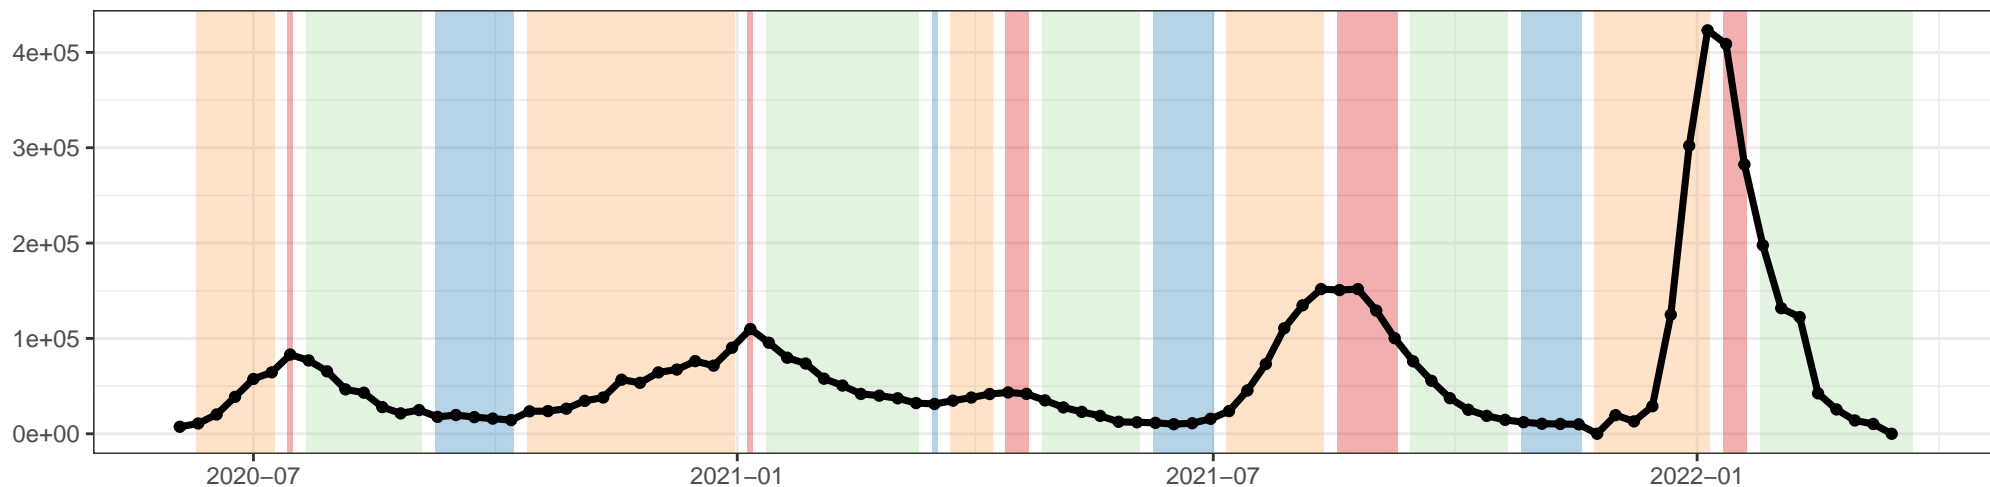

phase    increasing    decreasing    peak    nadir

\*Increasing/decreasing = Rt had a 90% probability  $\geq$  or  $\leq$  than 1.0.  
 Wks b/w two increasing/decreasing phases  $\rightarrow$  classified as increasing/decreasing.  
 Wks b/w increasing and decreasing phases = peaks; nadirs = wks b/w decreasing and increasing phases.

# Georgia

## Rt with 90% CI, w/ phase categories

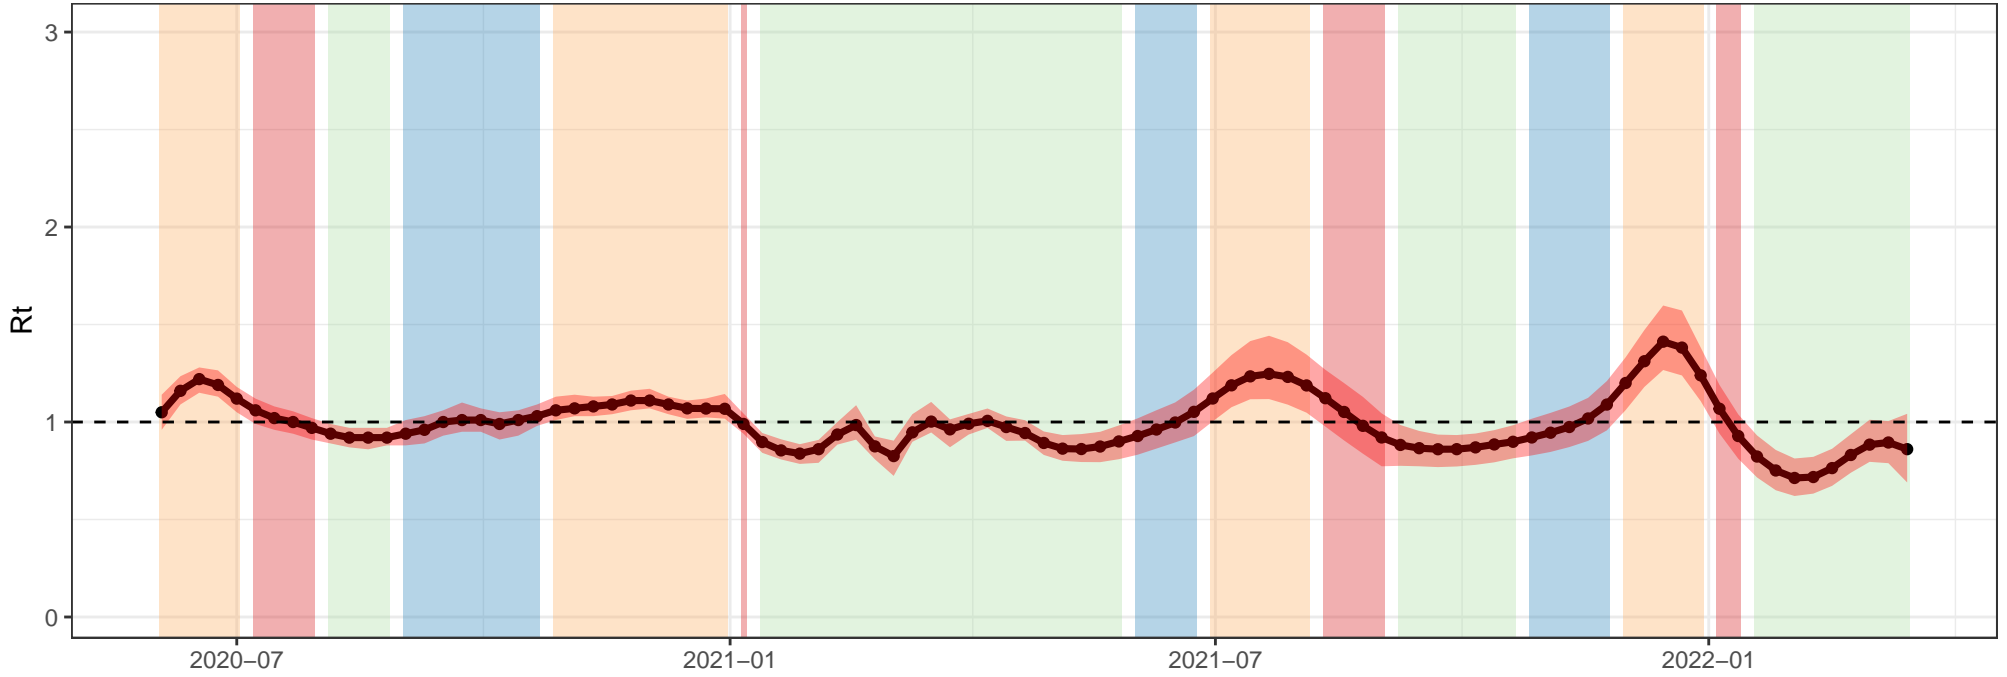

## Case counts w/ lagged phase categories\*

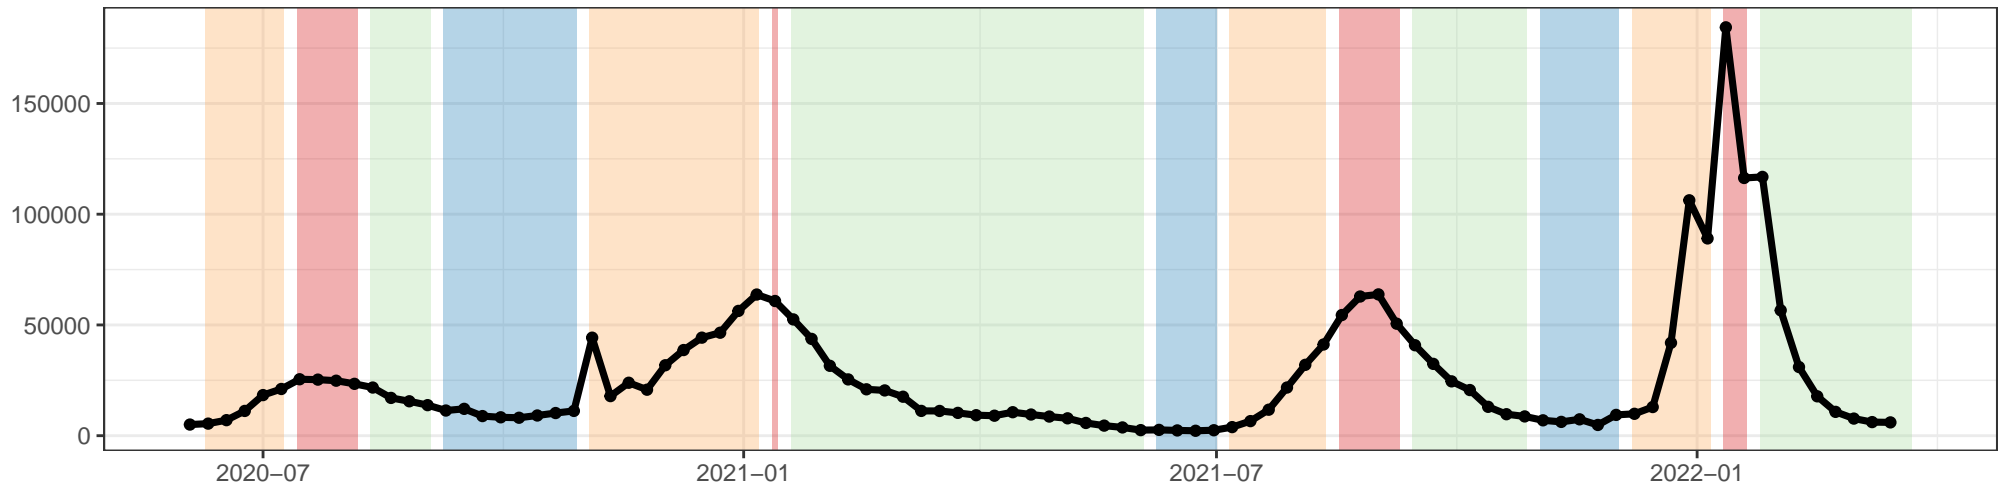

phase    increasing    decreasing    peak    nadir

\*Increasing/decreasing = Rt had a 90% probability  $\geq$  or  $\leq$  than 1.0.  
Wks b/w two increasing/decreasing phases  $\rightarrow$  classified as increasing/decreasing.  
Wks b/w increasing and decreasing phases = peaks; nadirs = wks b/w decreasing and increasing phases.

# Hawaii

## Rt with 90% CI, w/ phase categories

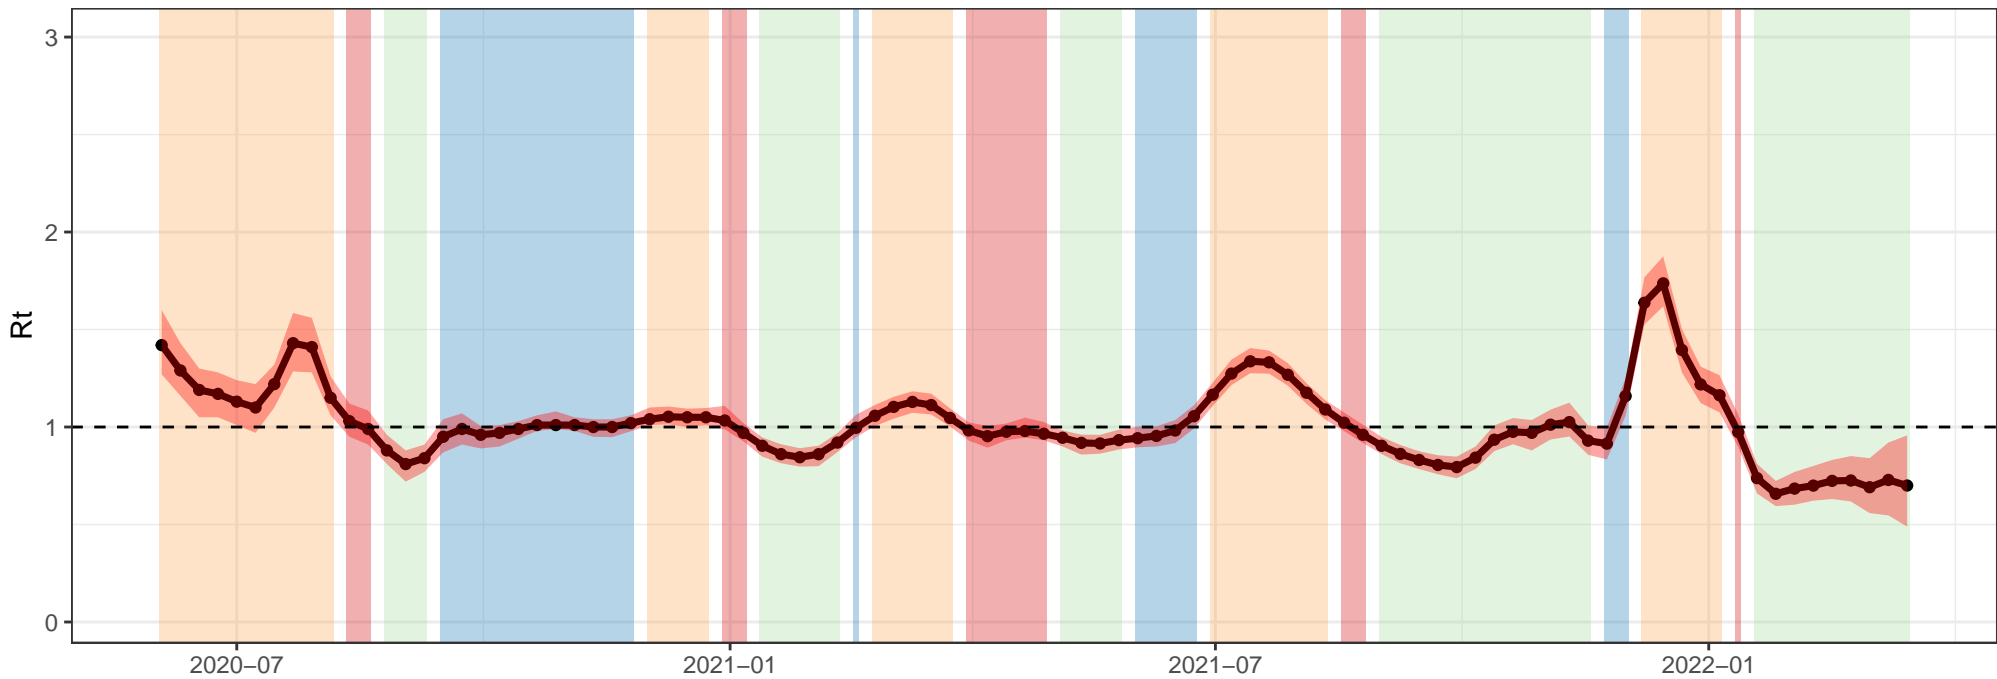

## Case counts w/ lagged phase categories\*

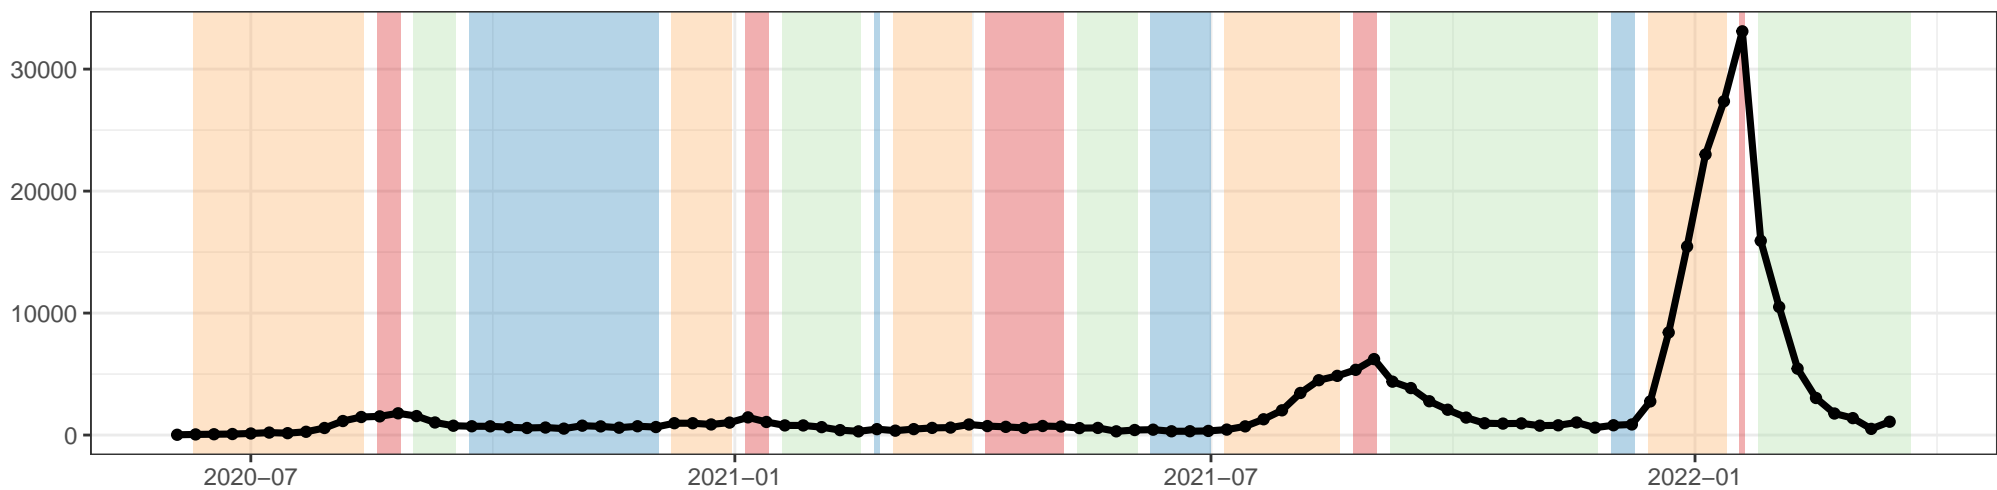

phase    increasing    decreasing    peak    nadir

\*Increasing/decreasing = Rt had a 90% probability  $\geq$  or  $\leq$  than 1.0.  
Wks b/w two increasing/decreasing phases  $\rightarrow$  classified as increasing/decreasing.  
Wks b/w increasing and decreasing phases = peaks; nadirs = wks b/w decreasing and increasing phases.

# Idaho

## Rt with 90% CI, w/ phase categories

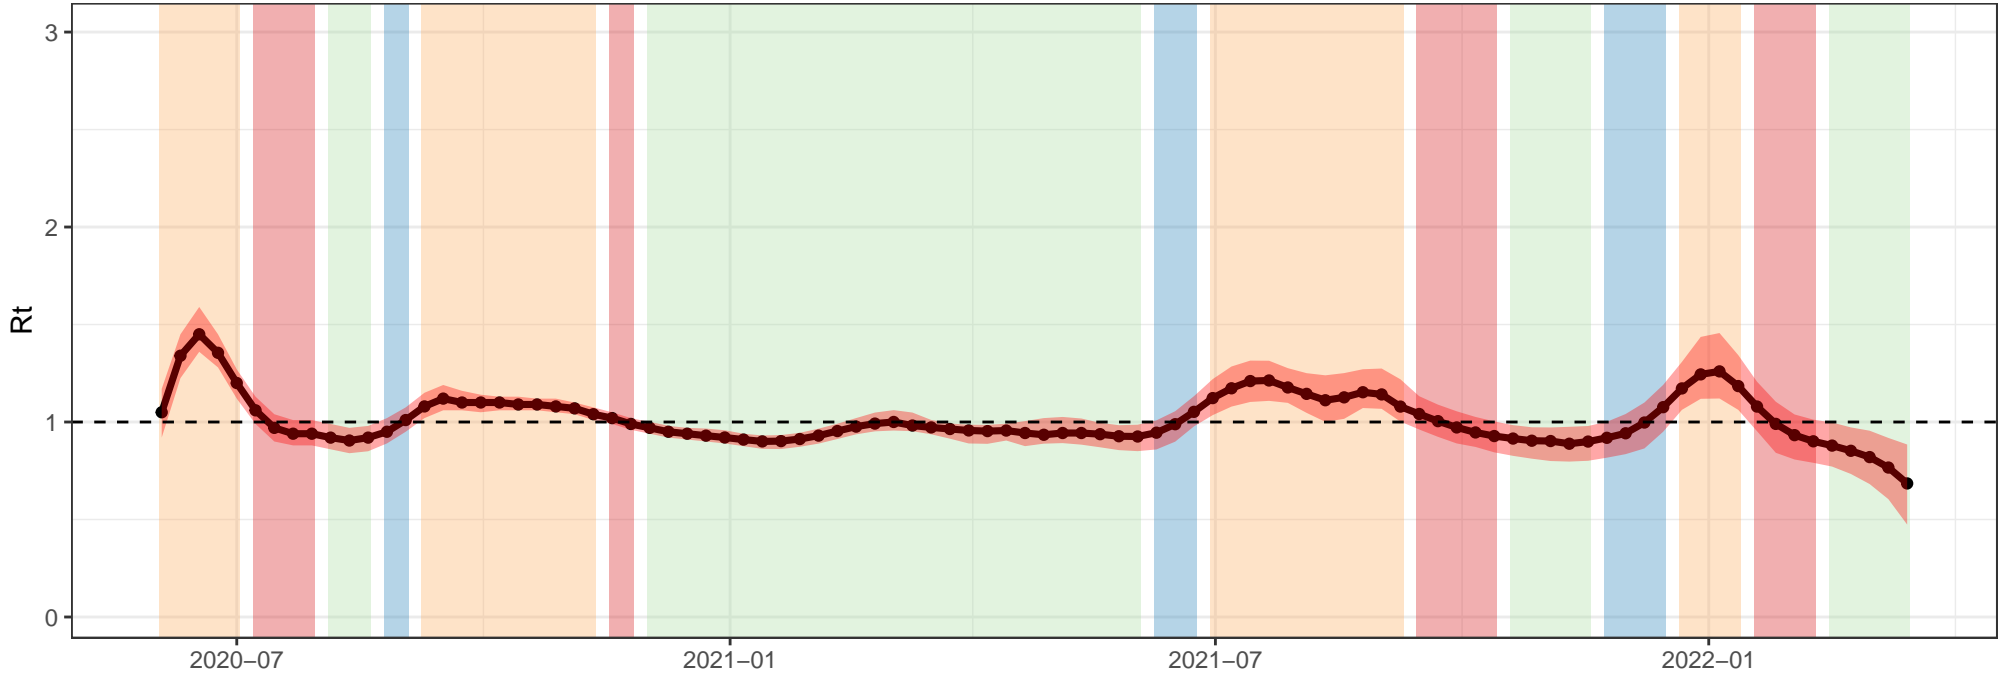

## Case counts w/ lagged phase categories\*

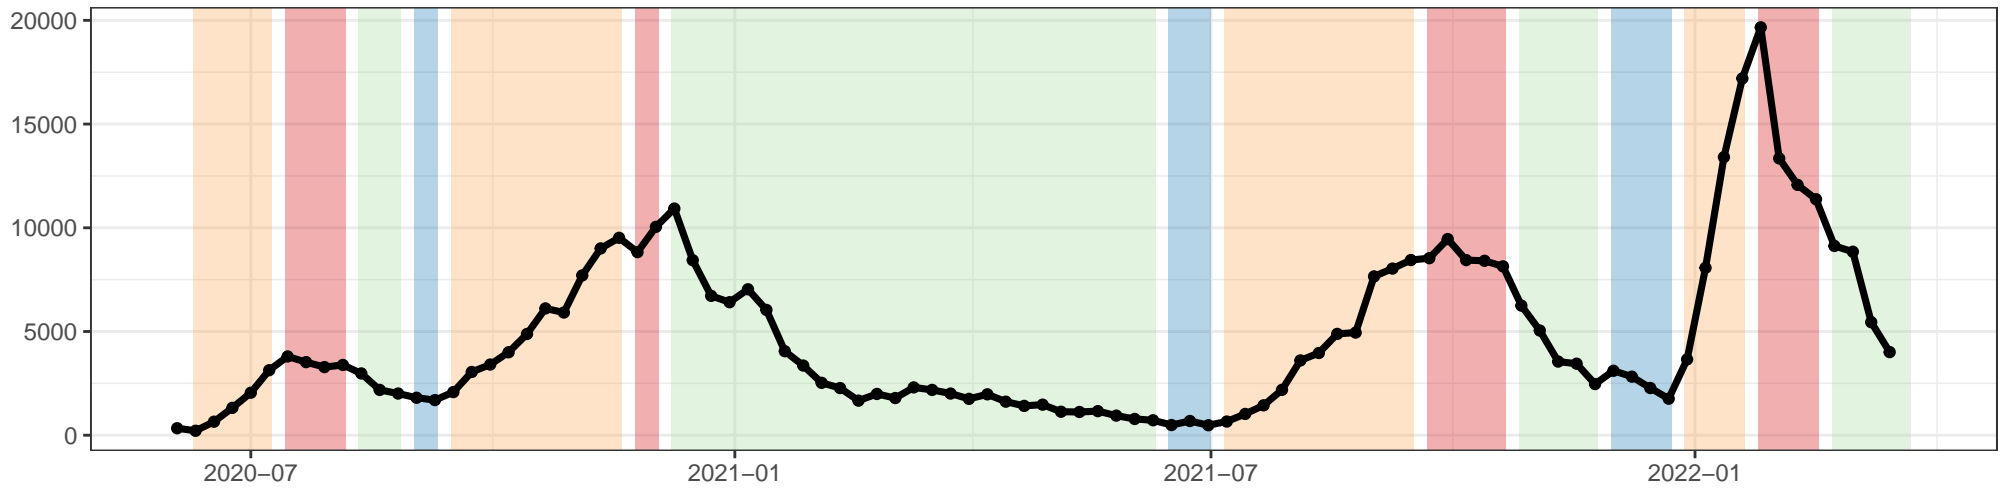

phase    increasing    decreasing    peak    nadir

\*Increasing/decreasing = Rt had a 90% probability  $\geq$  or  $\leq$  than 1.0.  
Wks b/w two increasing/decreasing phases  $\rightarrow$  classified as increasing/decreasing.  
Wks b/w increasing and decreasing phases = peaks; nadirs = wks b/w decreasing and increasing phases.

# Illinois

## Rt with 90% CI, w/ phase categories

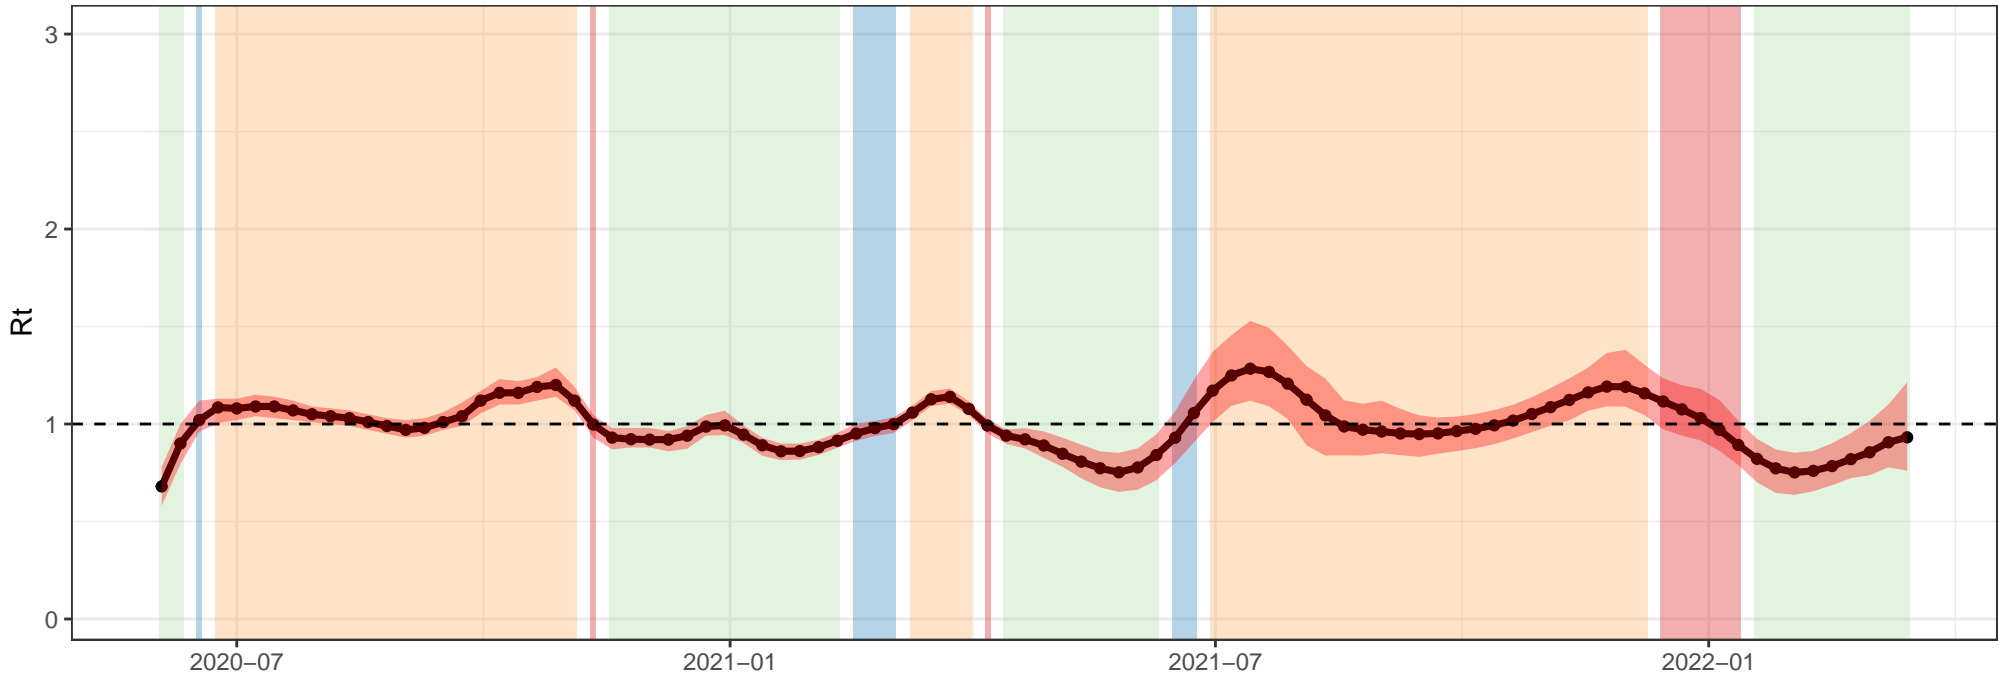

## Case counts w/ lagged phase categories\*

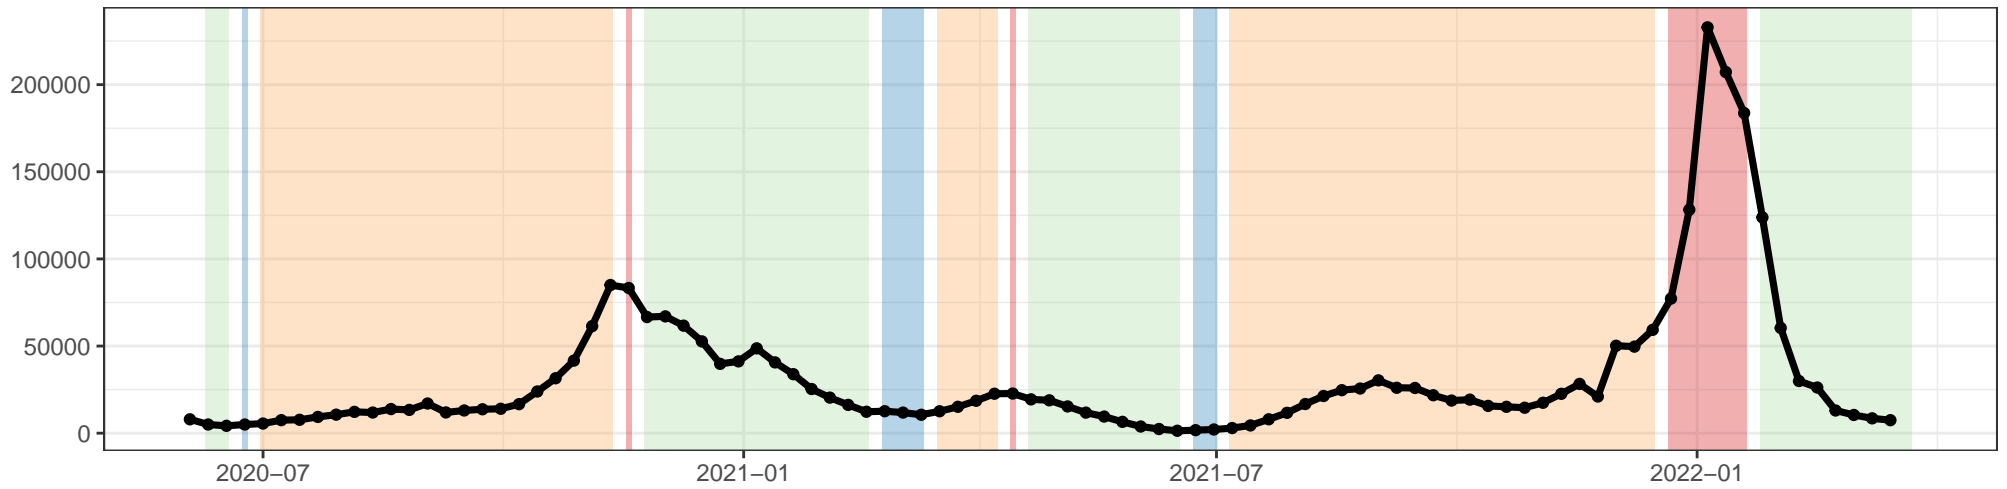

phase    increasing    decreasing    peak    nadir

\*Increasing/decreasing = Rt had a 90% probability  $\geq$  or  $\leq$  than 1.0.  
Wks b/w two increasing/decreasing phases  $\rightarrow$  classified as increasing/decreasing.  
Wks b/w increasing and decreasing phases = peaks; nadirs = wks b/w decreasing and increasing phases.

# Indiana

## Rt with 90% CI, w/ phase categories

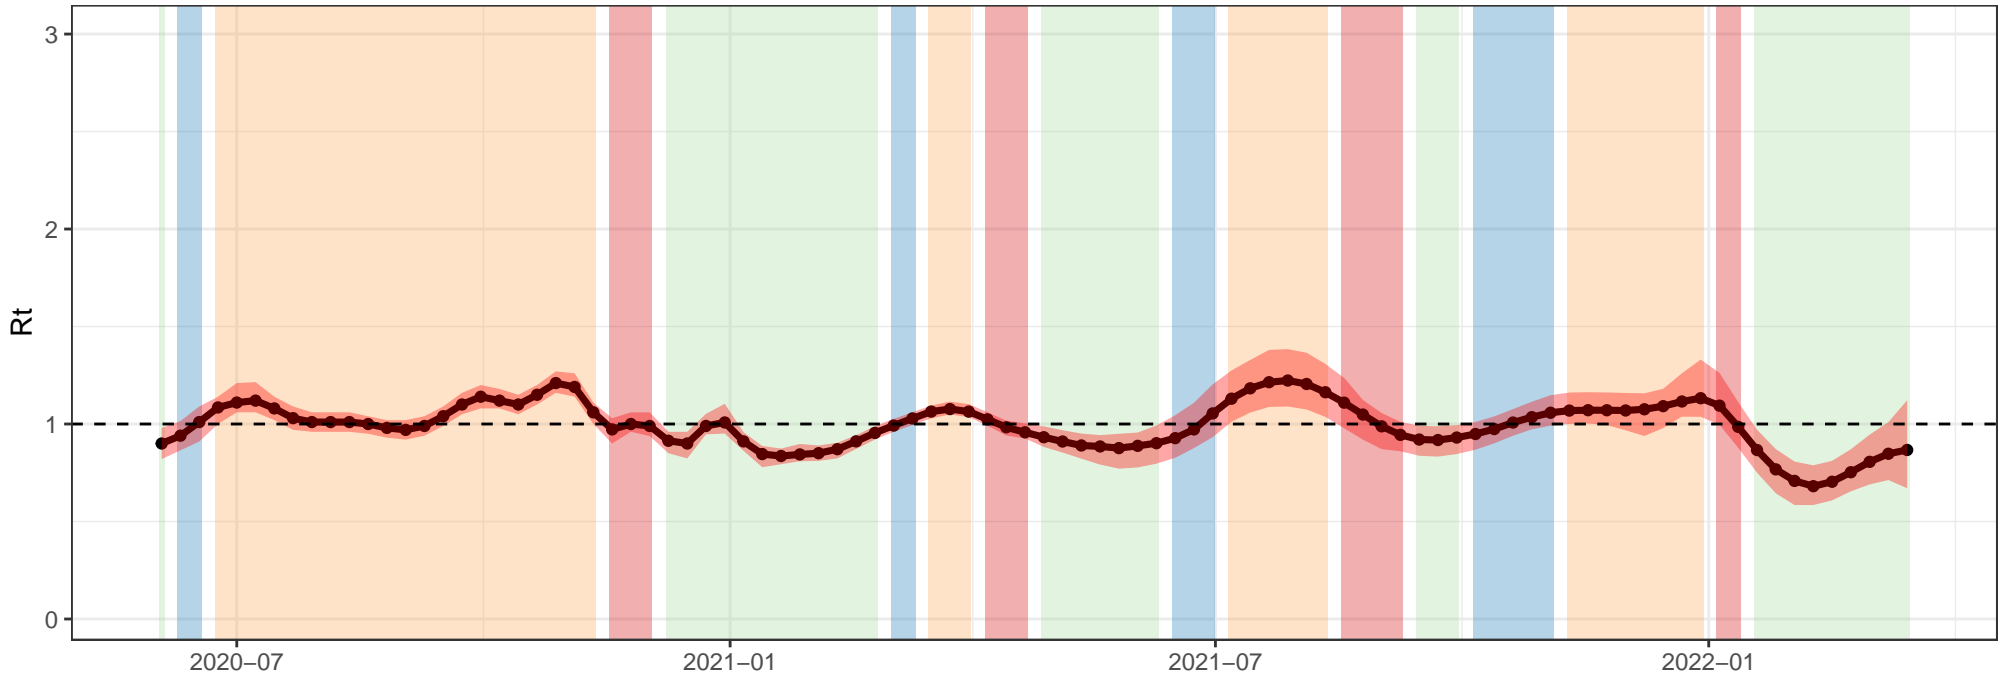

## Case counts w/ lagged phase categories\*

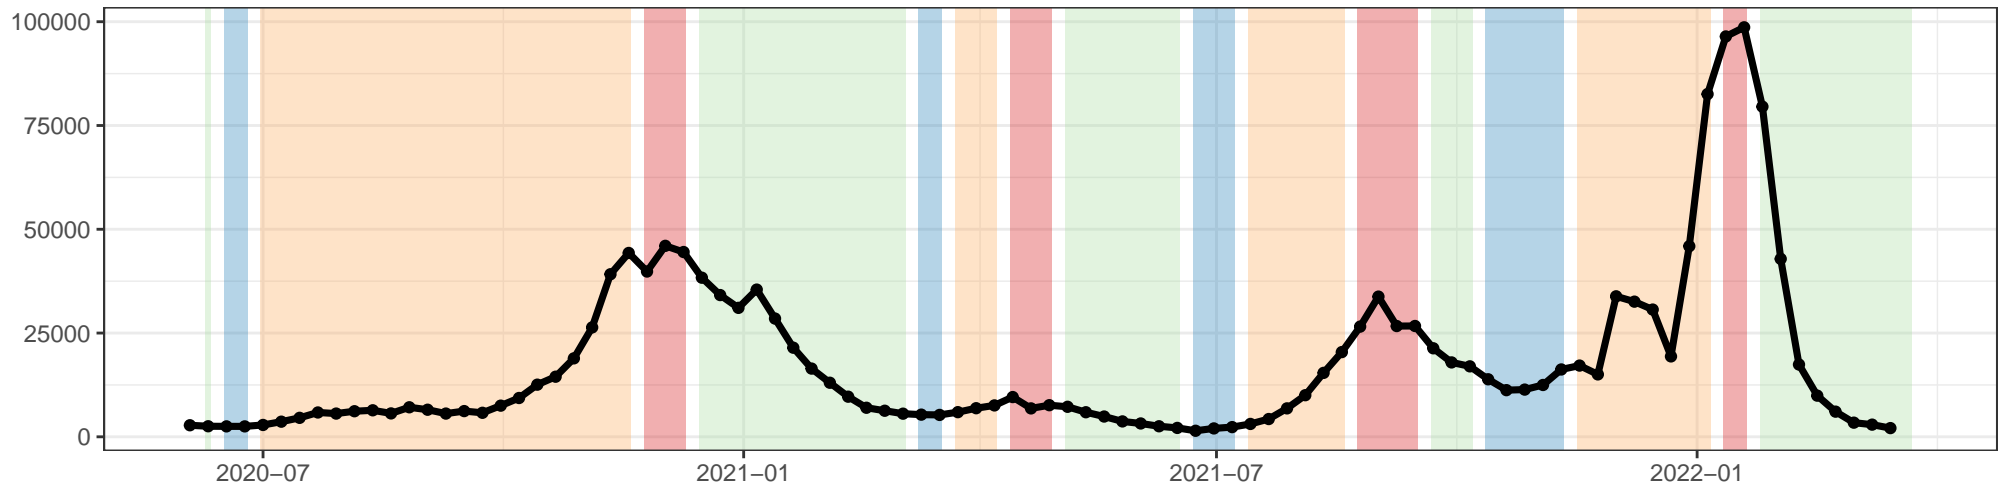

phase    increasing    decreasing    peak    nadir

\*Increasing/decreasing = Rt had a 90% probability  $\geq$  or  $\leq$  than 1.0.  
Wks b/w two increasing/decreasing phases  $\rightarrow$  classified as increasing/decreasing.  
Wks b/w increasing and decreasing phases = peaks; nadirs = wks b/w decreasing and increasing phases.

# Iowa

## Rt with 90% CI, w/ phase categories

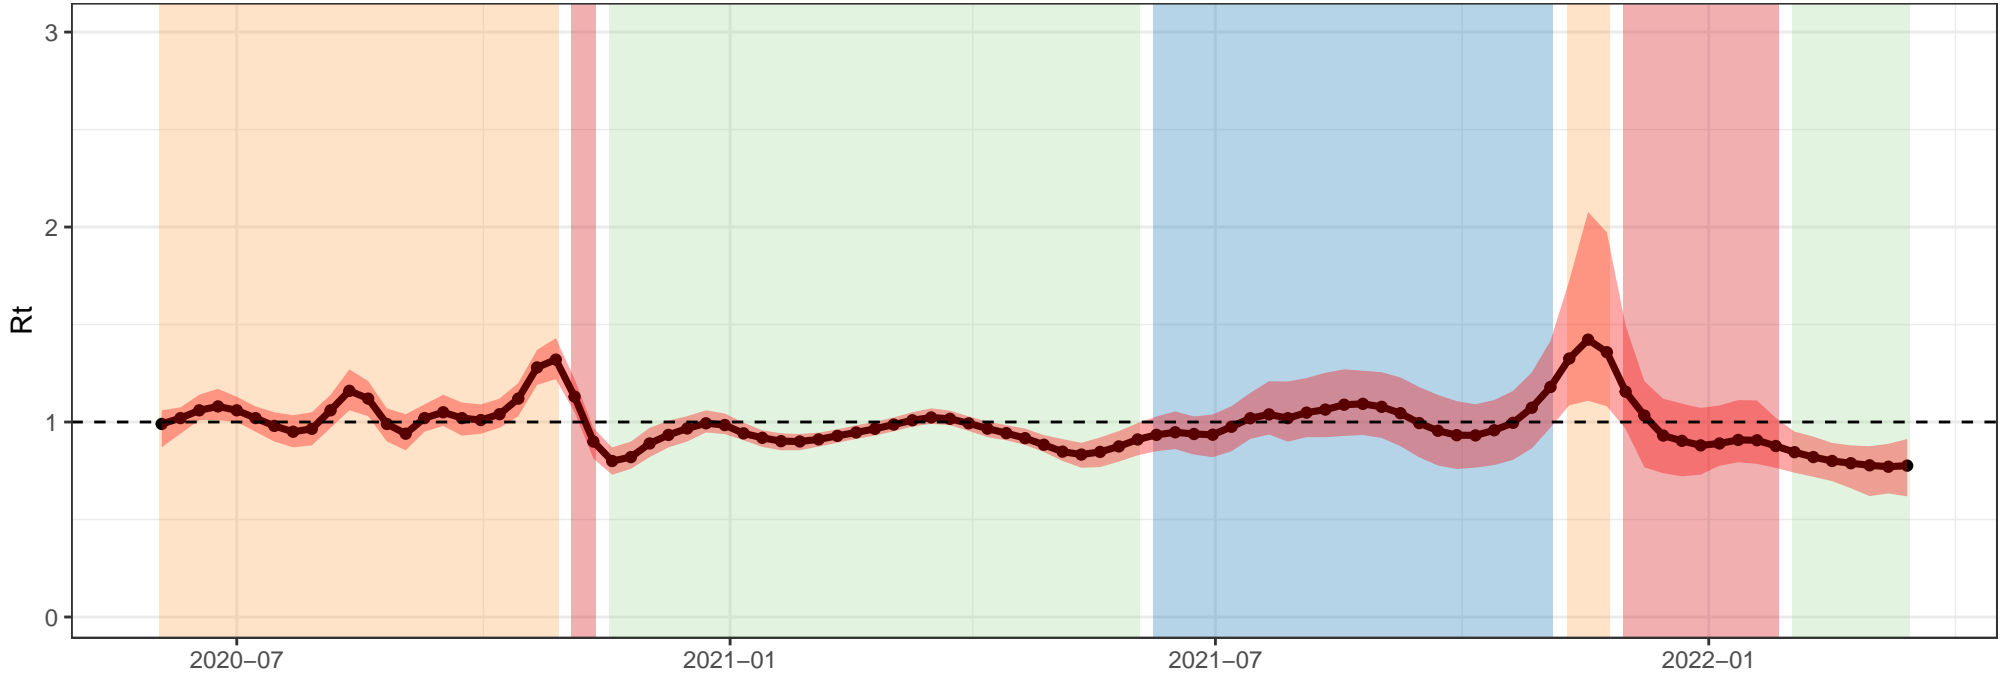

## Case counts w/ lagged phase categories\*

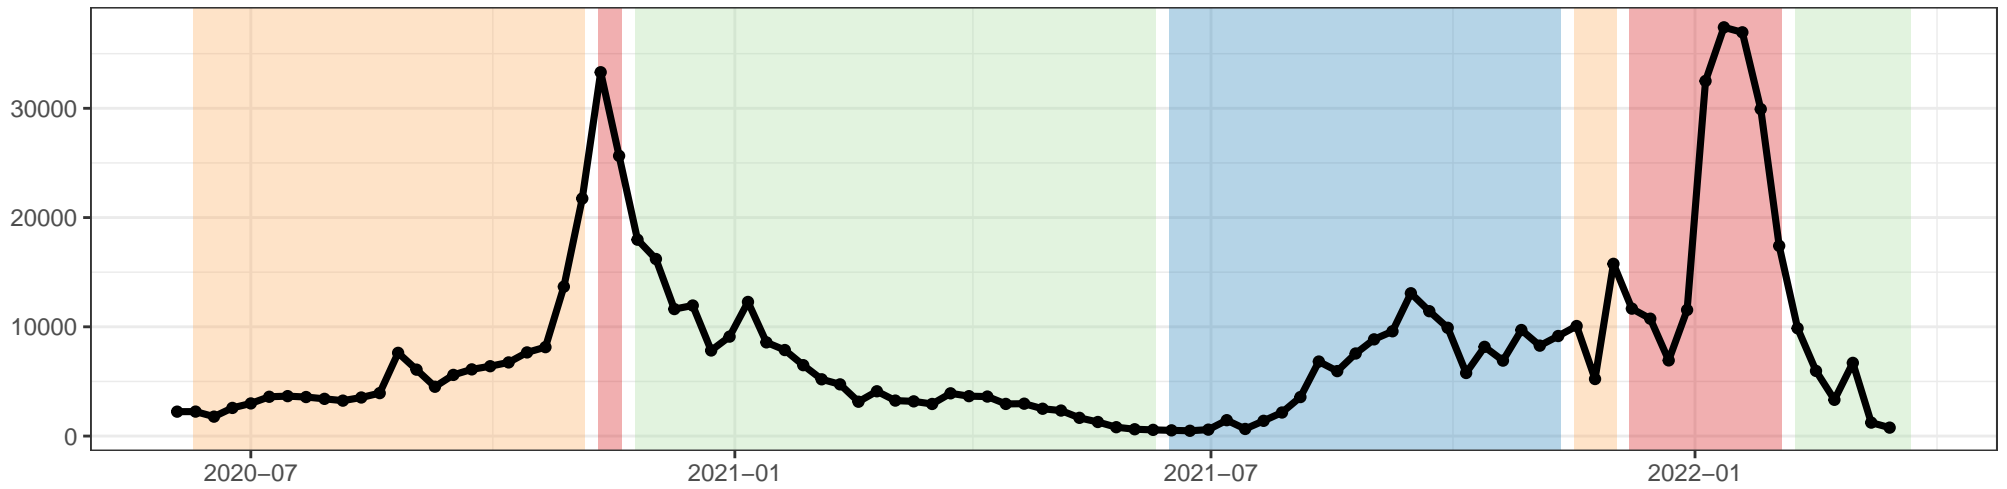

phase    increasing    decreasing    peak    nadir

\*Increasing/decreasing = Rt had a 90% probability  $\geq$  or  $\leq$  than 1.0.  
Wks b/w two increasing/decreasing phases  $\rightarrow$  classified as increasing/decreasing.  
Wks b/w increasing and decreasing phases = peaks; nadirs = wks b/w decreasing and increasing phases.

# Kansas

## Rt with 90% CI, w/ phase categories

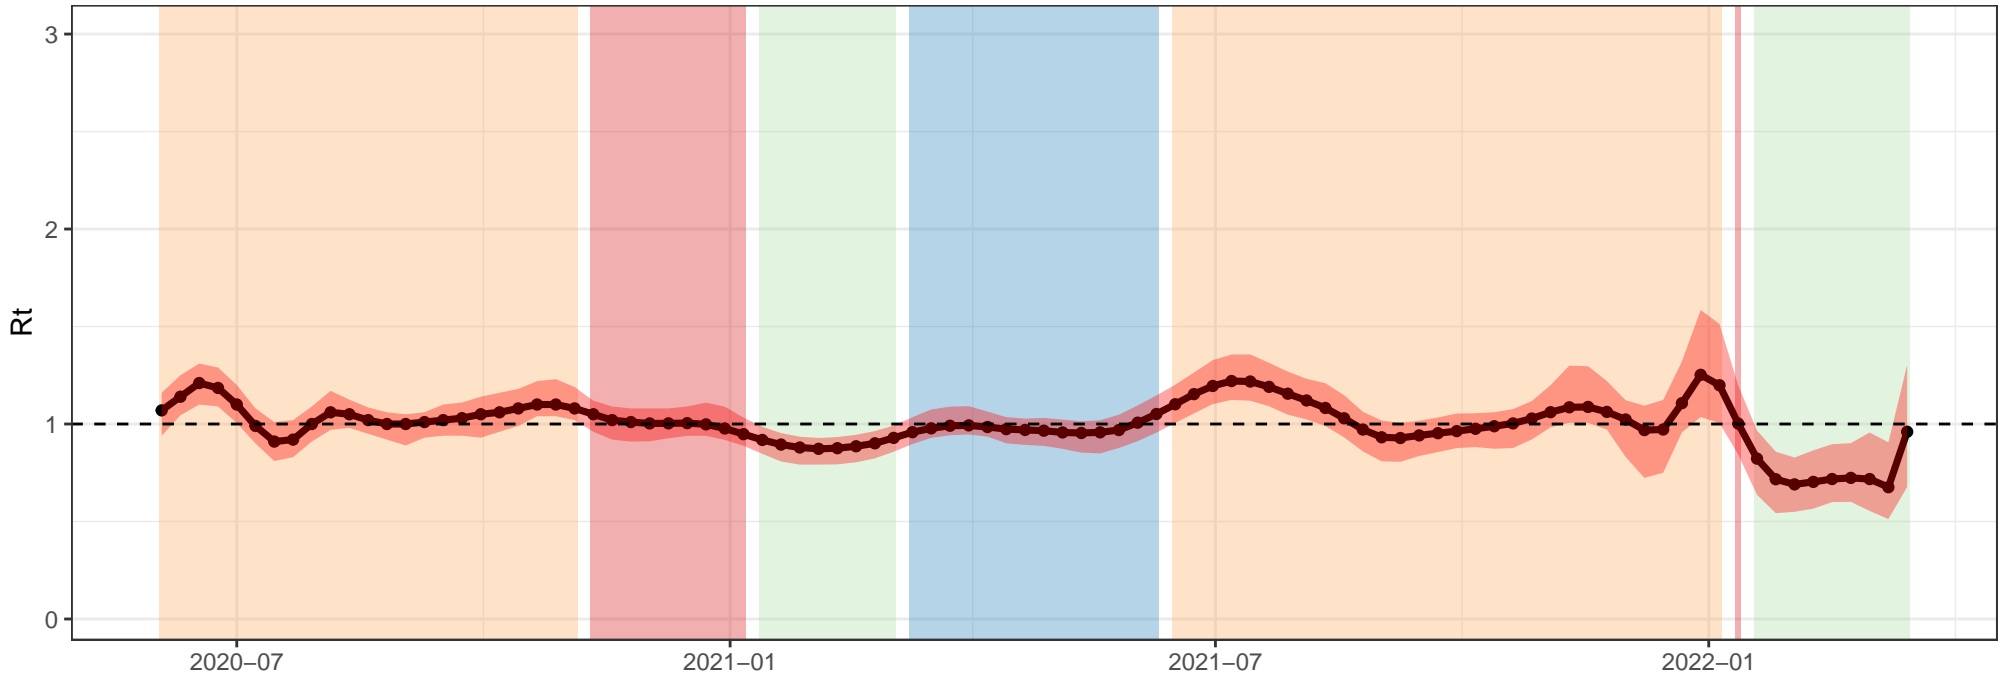

## Case counts w/ lagged phase categories\*

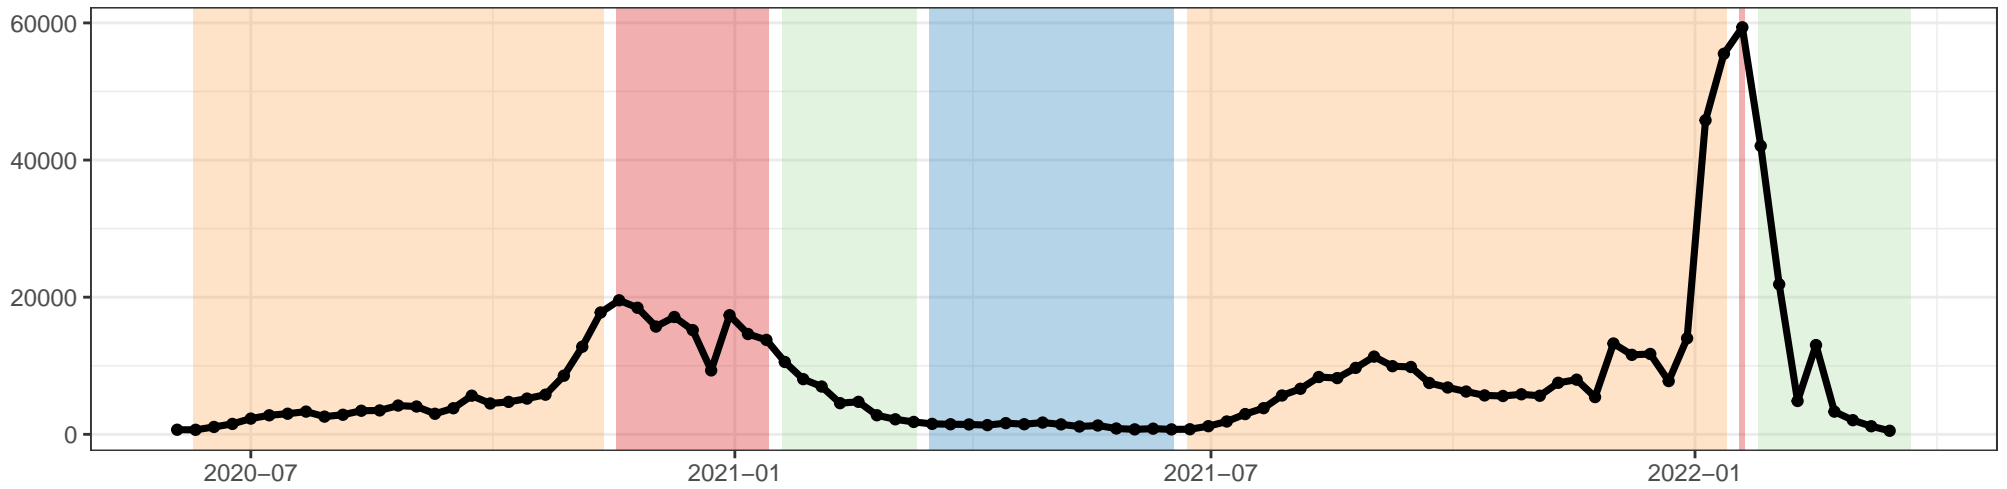

phase    increasing    decreasing    peak    nadir

\*Increasing/decreasing = Rt had a 90% probability  $\geq$  or  $\leq$  than 1.0.  
Wks b/w two increasing/decreasing phases  $\rightarrow$  classified as increasing/decreasing.  
Wks b/w increasing and decreasing phases = peaks; nadirs = wks b/w decreasing and increasing phases.



# Kentucky

## Rt with 90% CI, w/ phase categories

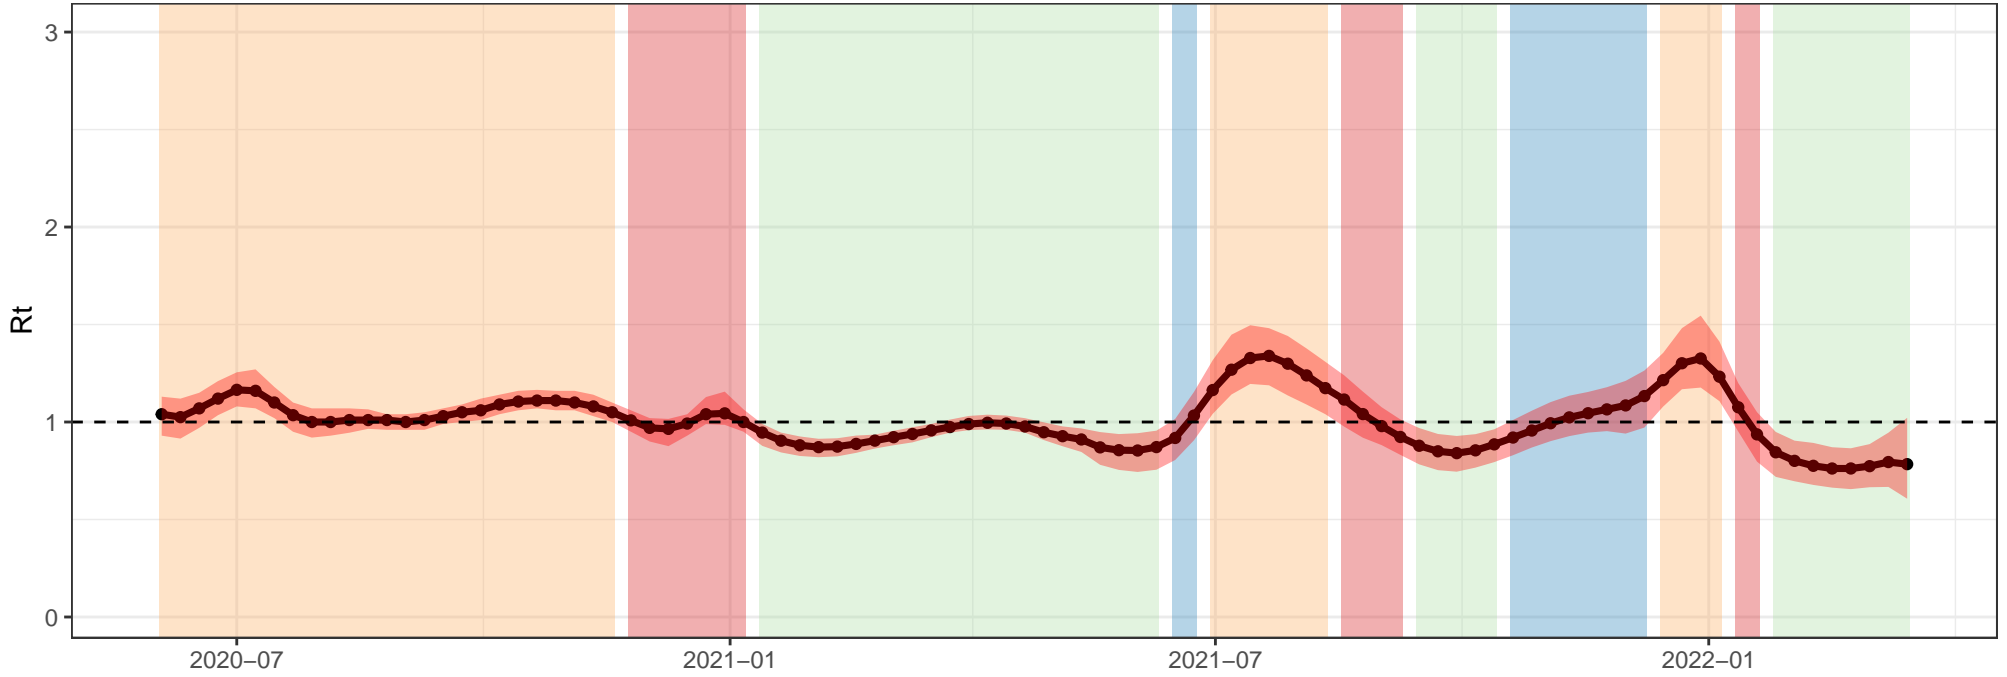

## Case counts w/ lagged phase categories\*

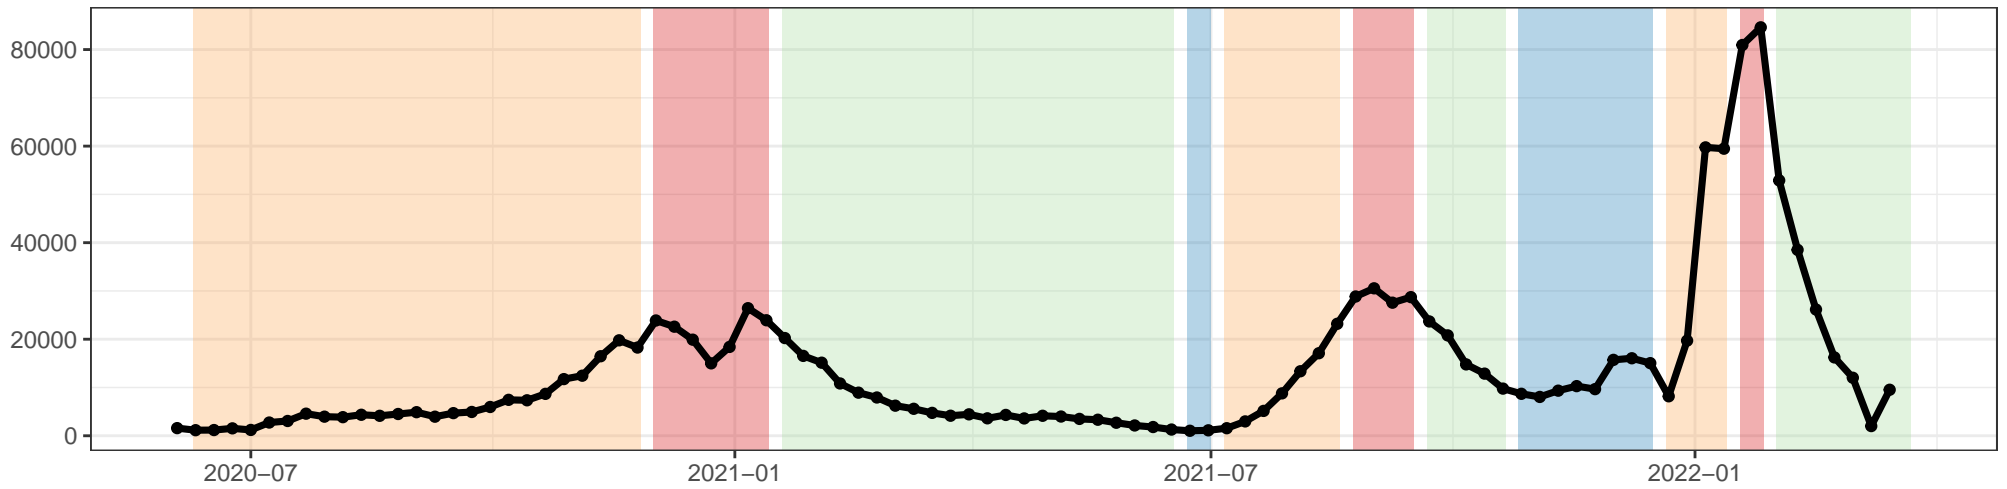

phase    increasing    decreasing    peak    nadir

\*Increasing/decreasing = Rt had a 90% probability  $\geq$  or  $\leq$  than 1.0.  
Wks b/w two increasing/decreasing phases  $\rightarrow$  classified as increasing/decreasing.  
Wks b/w increasing and decreasing phases = peaks; nadirs = wks b/w decreasing and increasing phases.

# Louisiana

## Rt with 90% CI, w/ phase categories

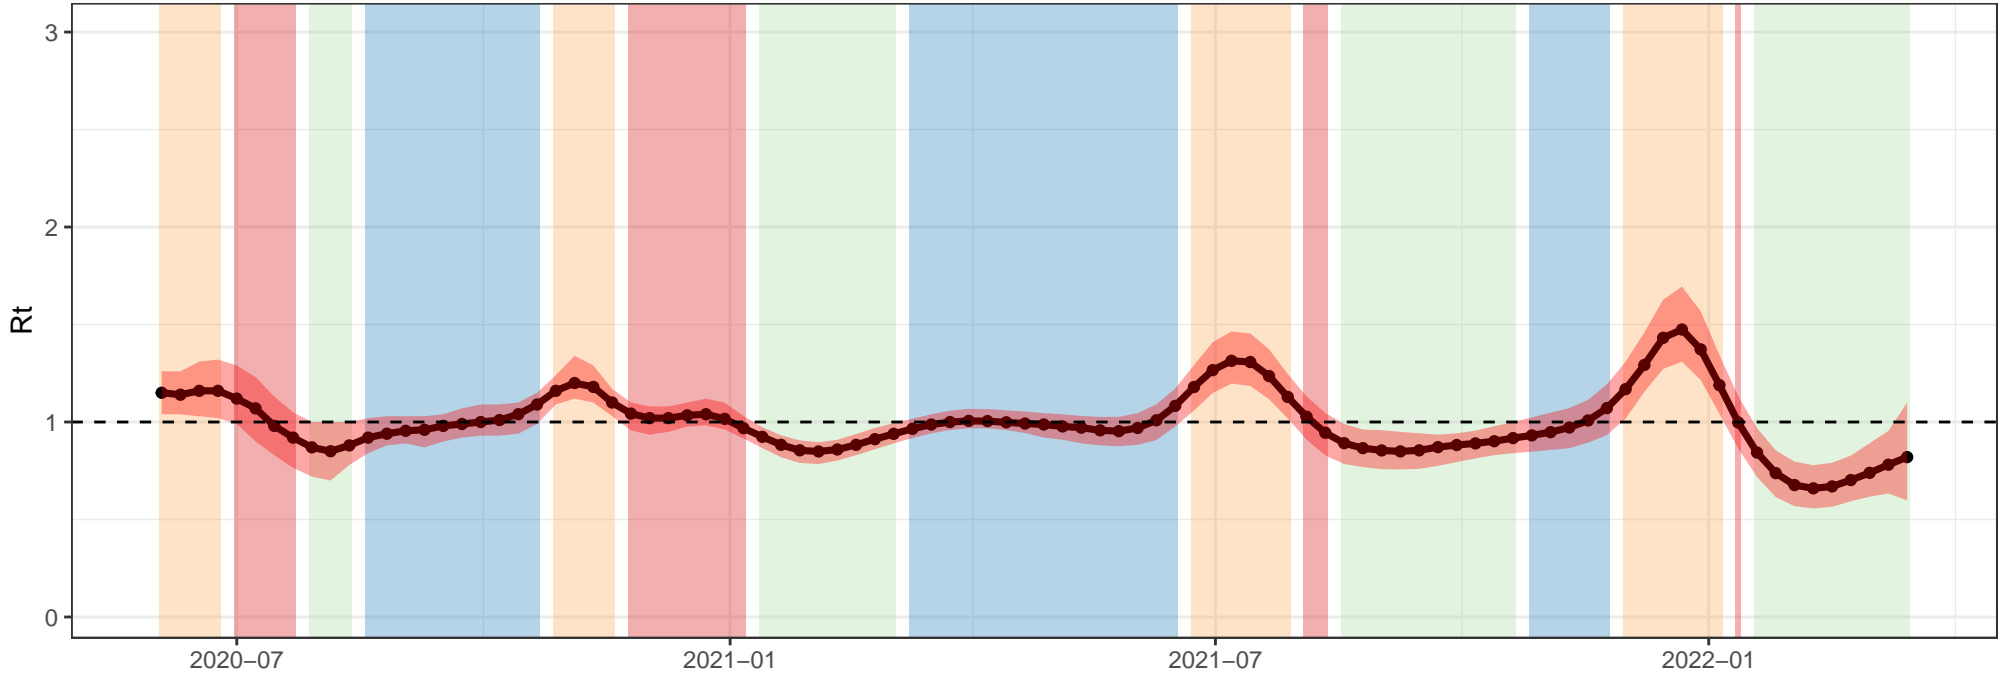

## Case counts w/ lagged phase categories\*

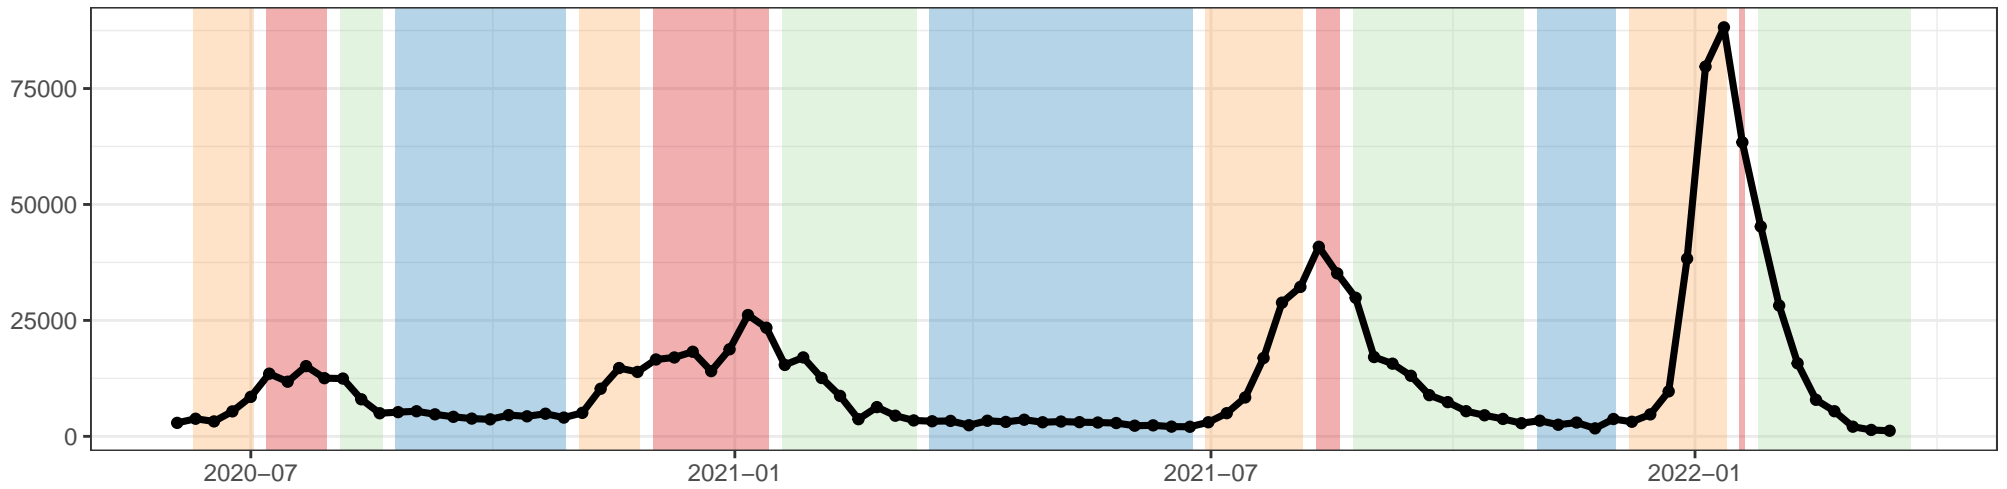

phase    increasing    decreasing    peak    nadir

\*Increasing/decreasing = Rt had a 90% probability  $\geq$  or  $\leq$  than 1.0.  
Wks b/w two increasing/decreasing phases  $\rightarrow$  classified as increasing/decreasing.  
Wks b/w increasing and decreasing phases = peaks; nadirs = wks b/w decreasing and increasing phases.

# Maine

## Rt with 90% CI, w/ phase categories

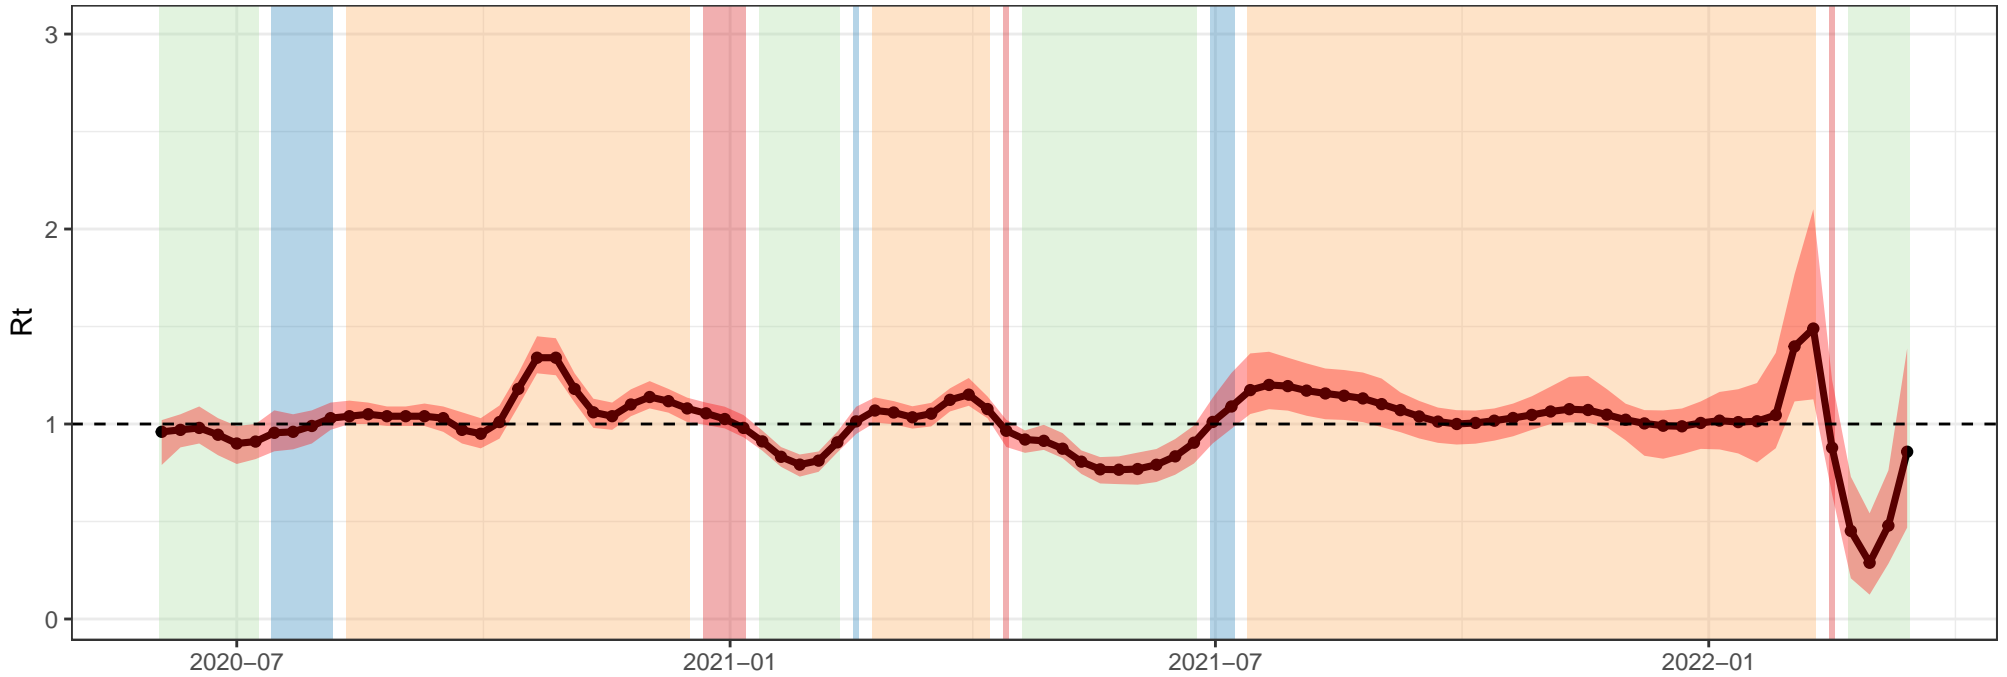

## Case counts w/ lagged phase categories\*

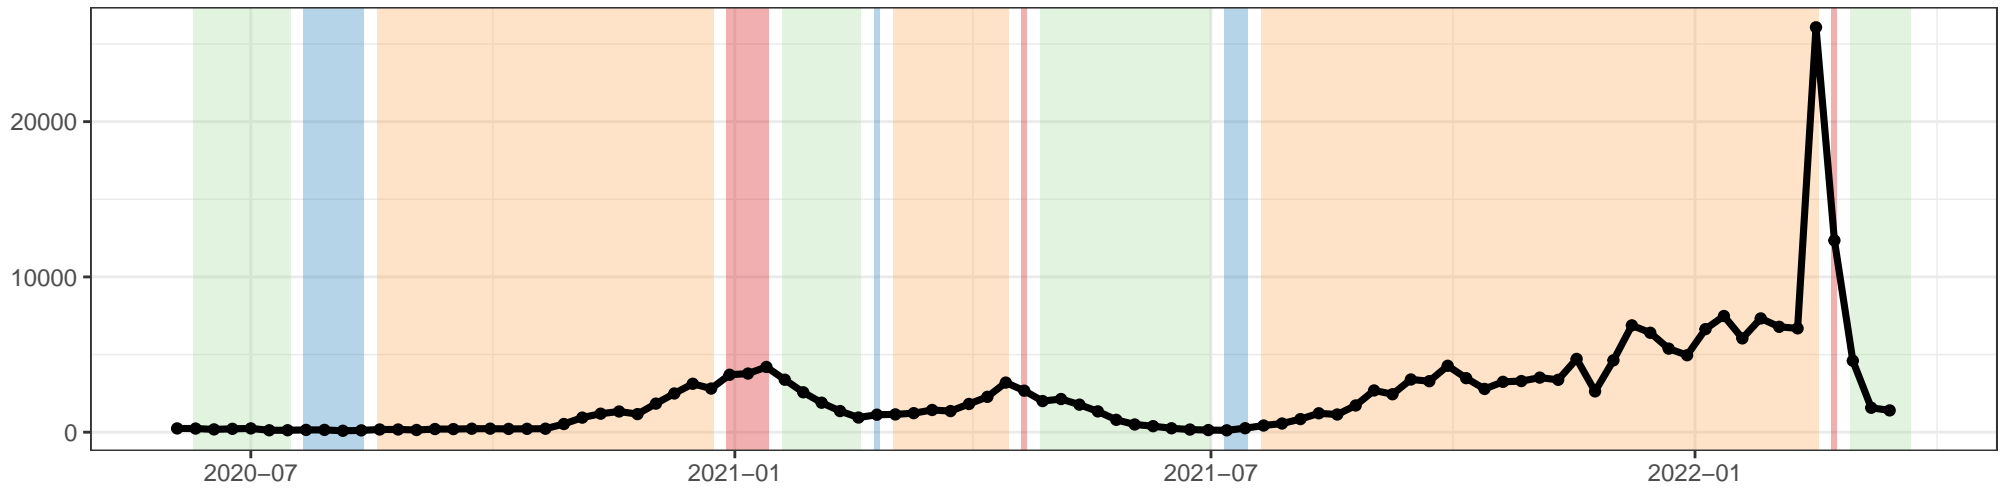

phase    increasing    decreasing    peak    nadir

\*Increasing/decreasing = Rt had a 90% probability  $\geq$  or  $\leq$  than 1.0.  
Wks b/w two increasing/decreasing phases  $\rightarrow$  classified as increasing/decreasing.  
Wks b/w increasing and decreasing phases = peaks; nadirs = wks b/w decreasing and increasing phases.

# Maryland

## Rt with 90% CI, w/ phase categories

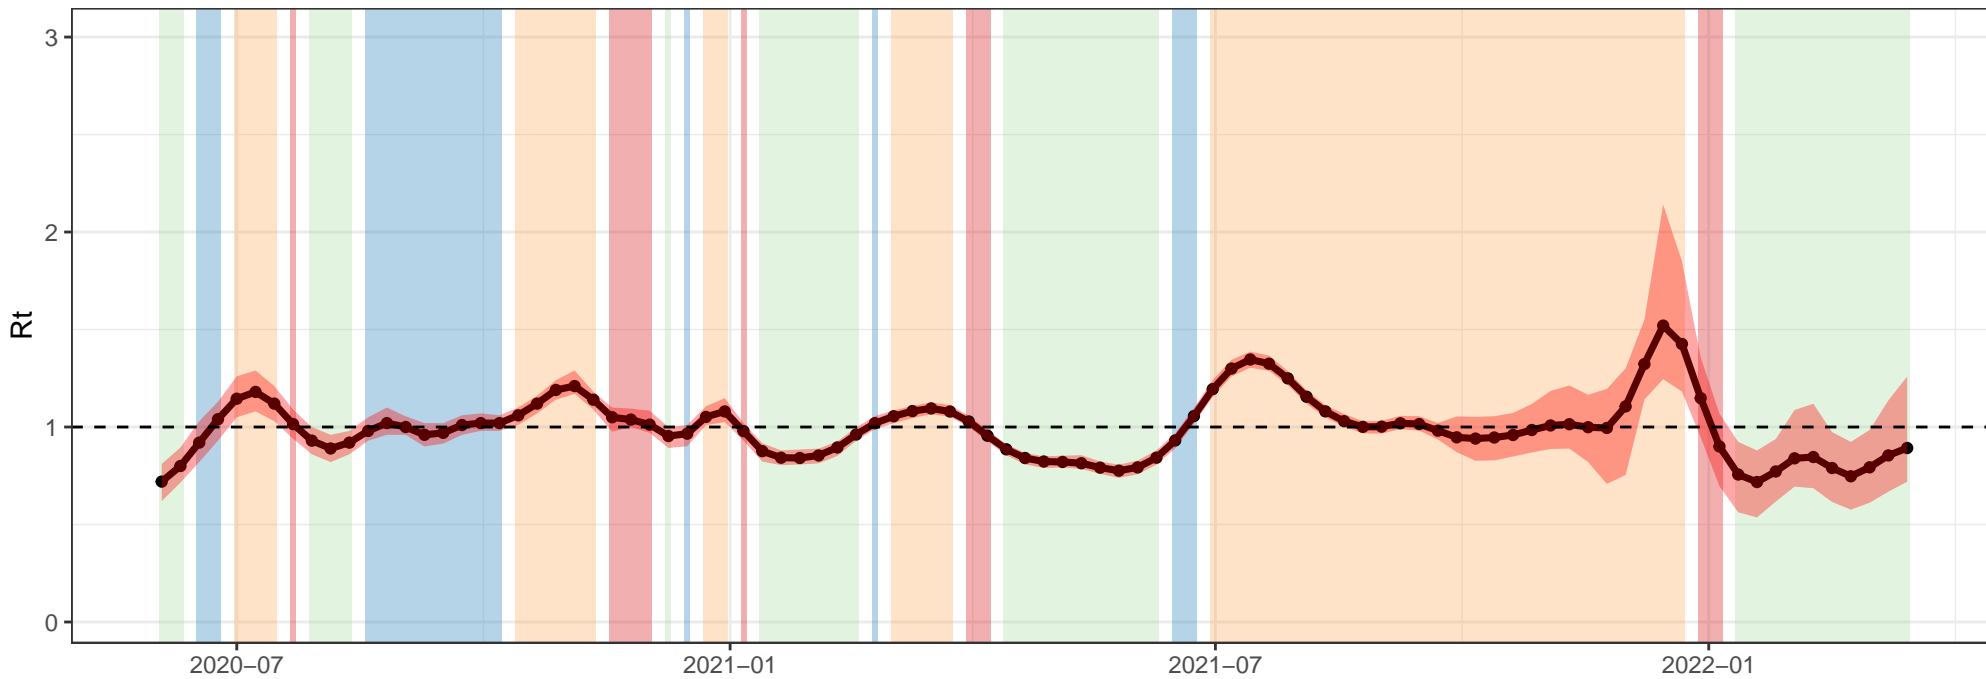

## Case counts w/ lagged phase categories\*

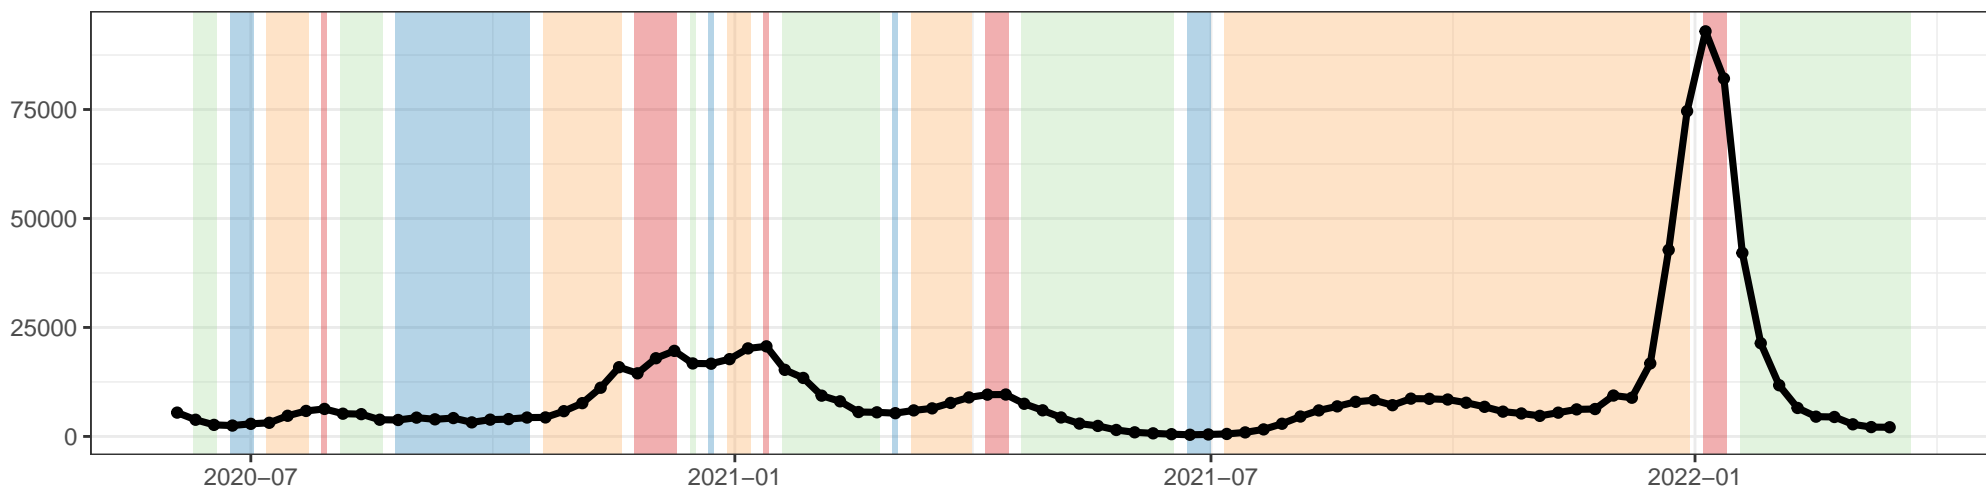

phase    increasing    decreasing    peak    nadir

\*Increasing/decreasing = Rt had a 90% probability  $\geq$  or  $\leq$  than 1.0.  
Wks b/w two increasing/decreasing phases  $\rightarrow$  classified as increasing/decreasing.  
Wks b/w increasing and decreasing phases = peaks; nadirs = wks b/w decreasing and increasing phases.

# Massachusetts

## Rt with 90% CI, w/ phase categories

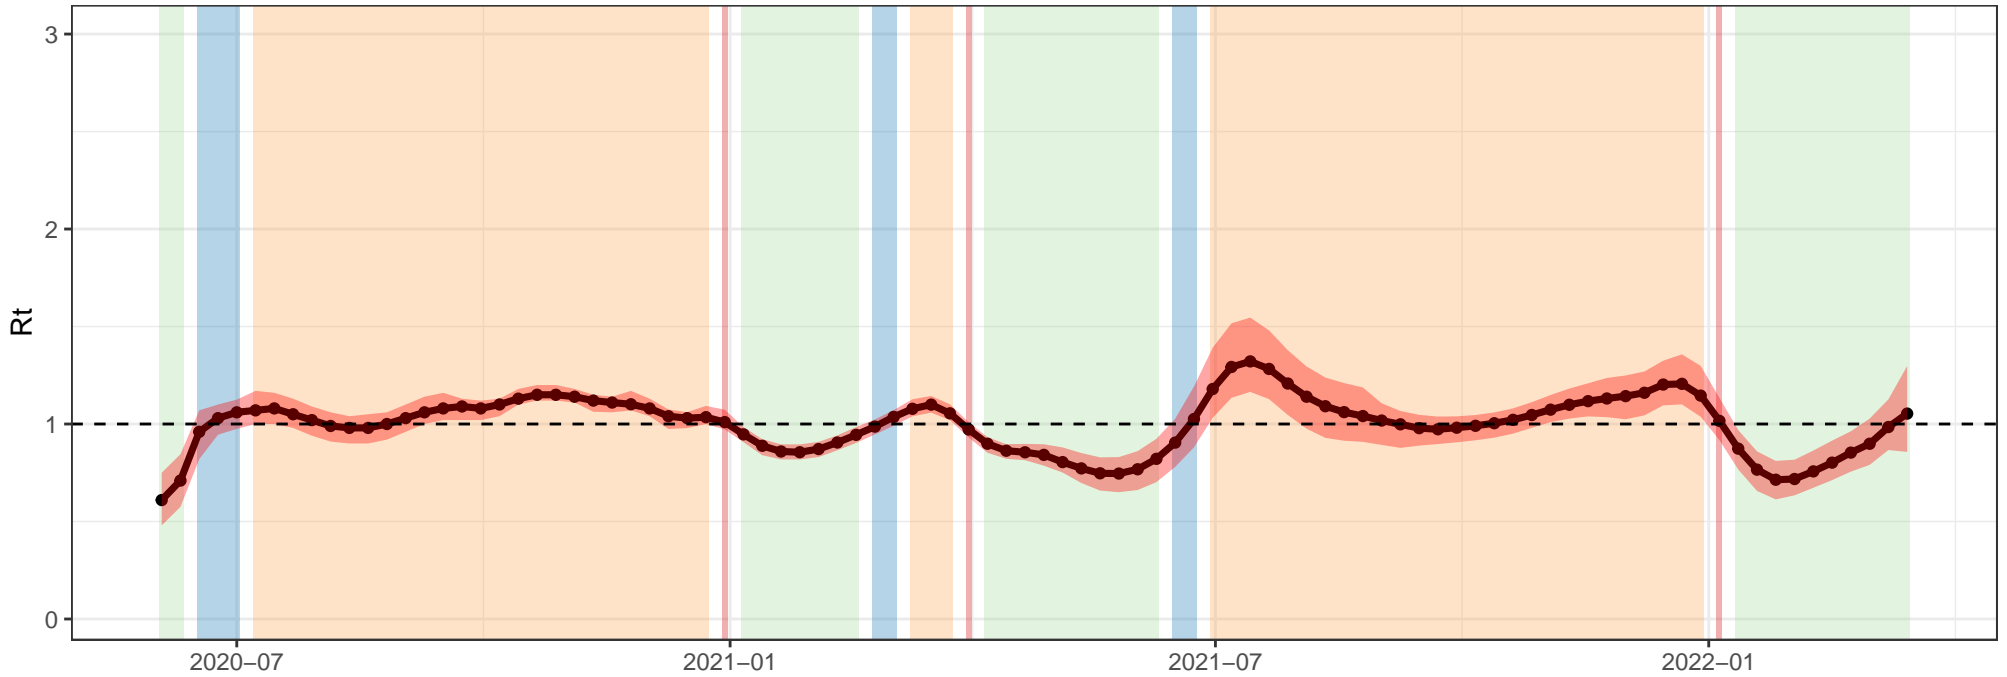

## Case counts w/ lagged phase categories\*

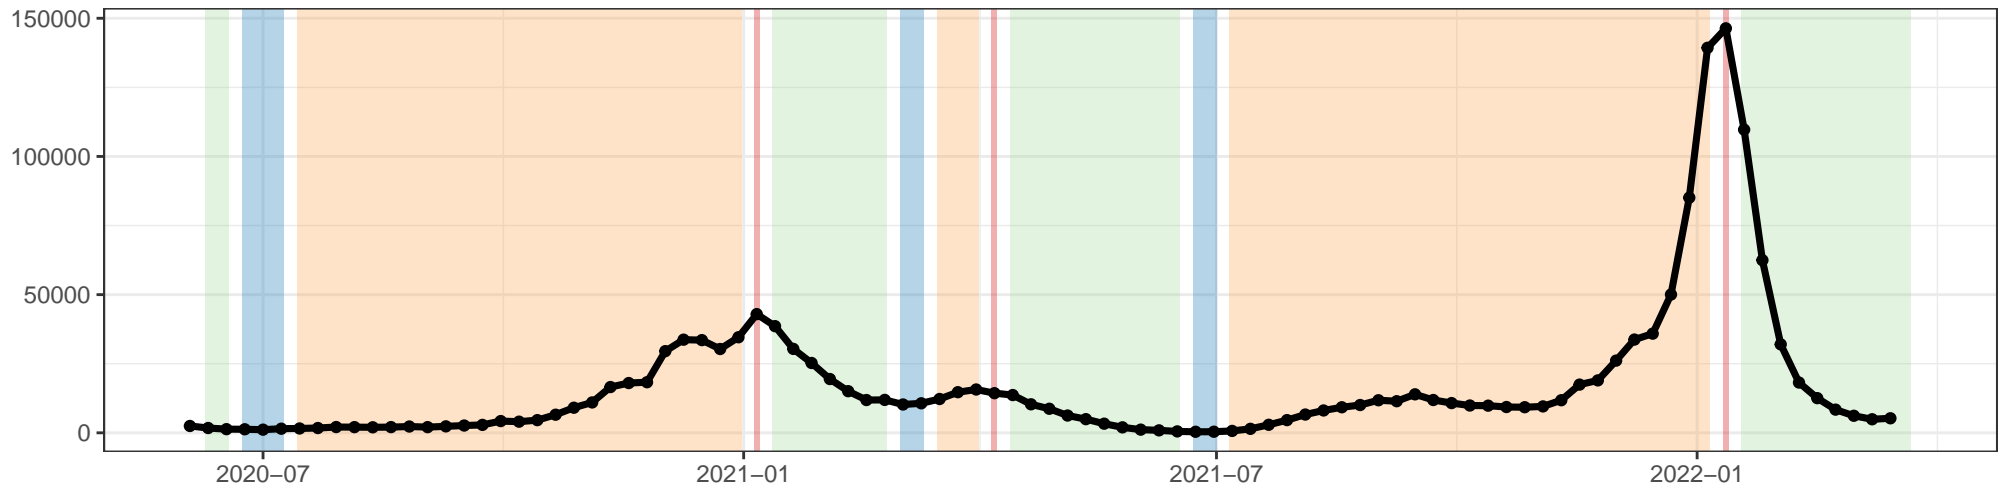

phase    increasing    decreasing    peak    nadir

\*Increasing/decreasing = Rt had a 90% probability  $\geq$  or  $\leq$  than 1.0.  
Wks b/w two increasing/decreasing phases  $\rightarrow$  classified as increasing/decreasing.  
Wks b/w increasing and decreasing phases = peaks; nadirs = wks b/w decreasing and increasing phases.

# Michigan

## Rt with 90% CI, w/ phase categories

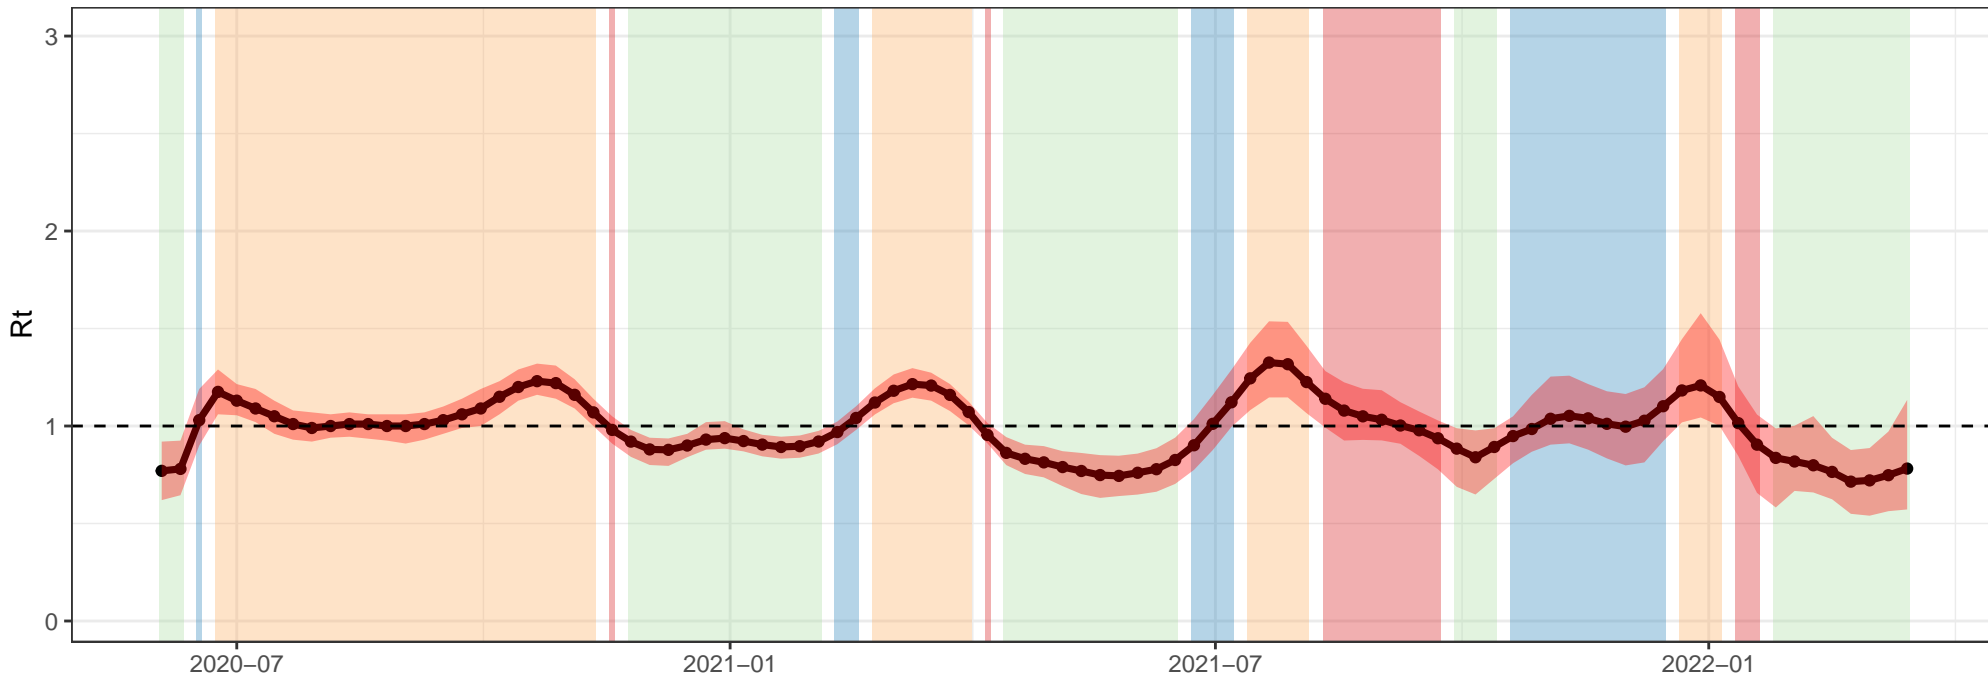

## Case counts w/ lagged phase categories\*

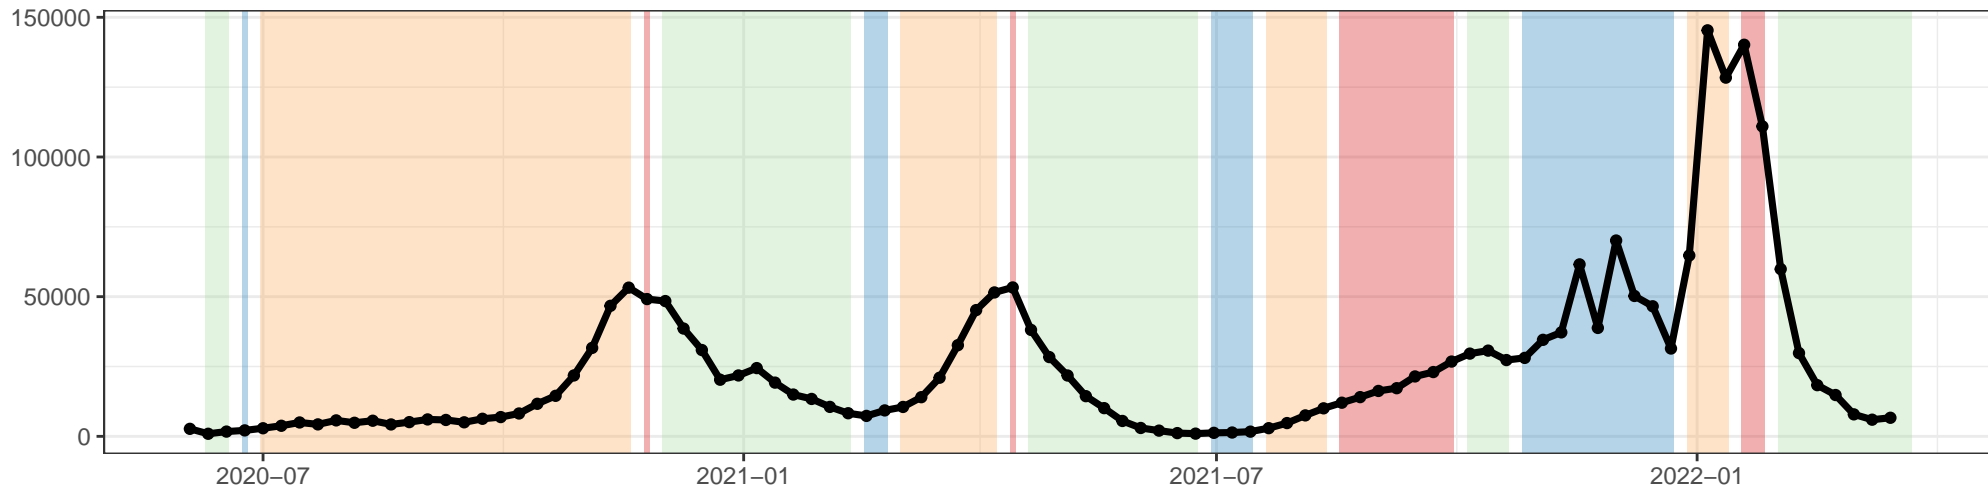

phase    increasing    decreasing    peak    nadir

\*Increasing/decreasing = Rt had a 90% probability  $\geq$  or  $\leq$  than 1.0.  
Wks b/w two increasing/decreasing phases  $\rightarrow$  classified as increasing/decreasing.  
Wks b/w increasing and decreasing phases = peaks; nadirs = wks b/w decreasing and increasing phases.

# Minnesota

## Rt with 90% CI, w/ phase categories

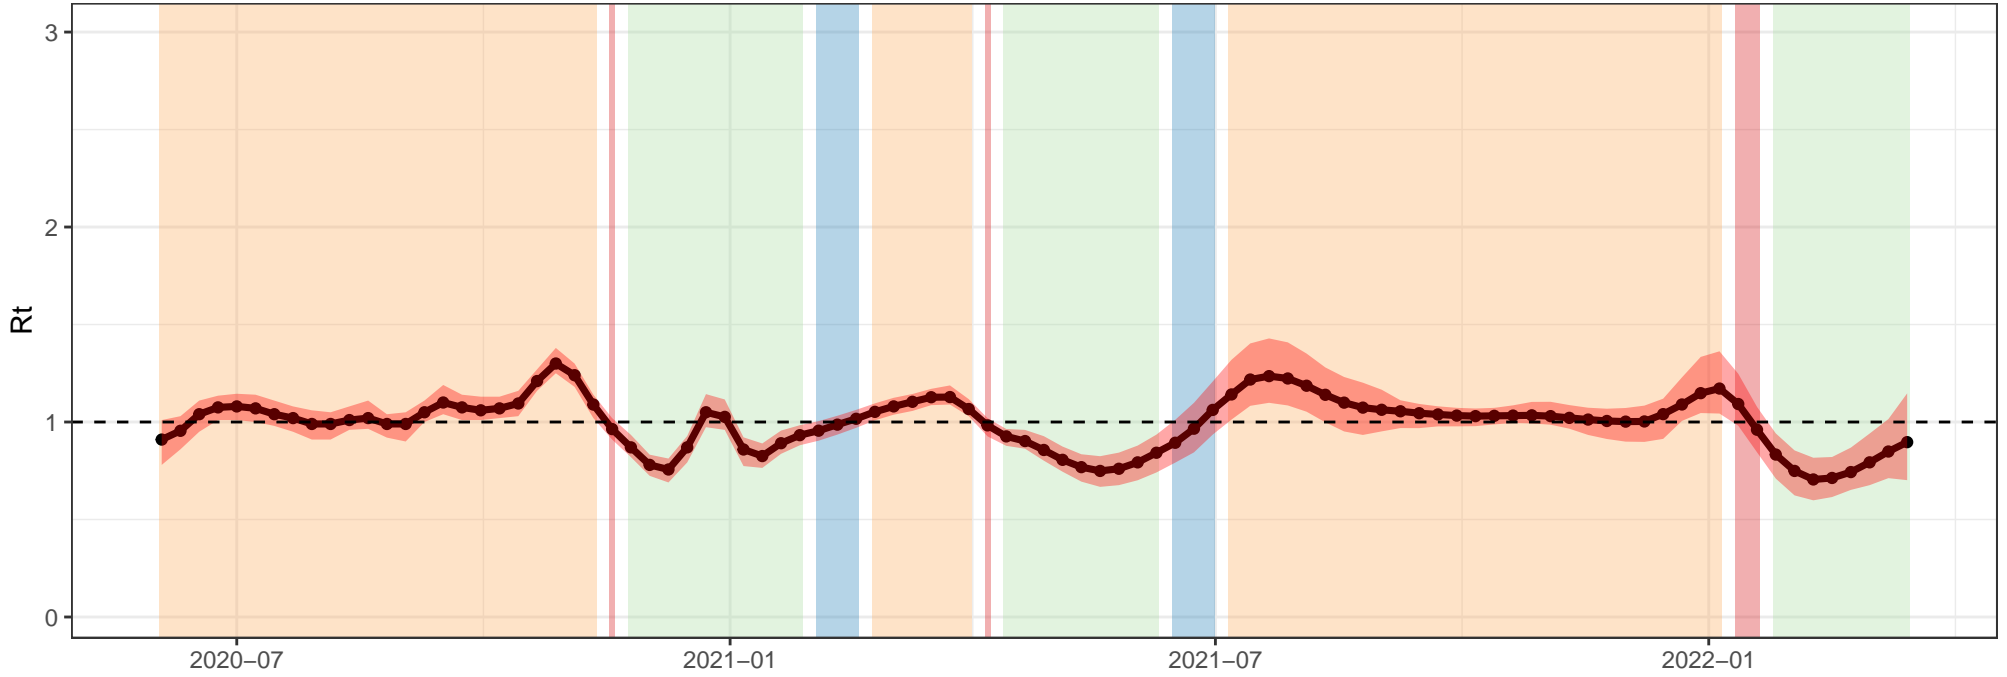

## Case counts w/ lagged phase categories\*

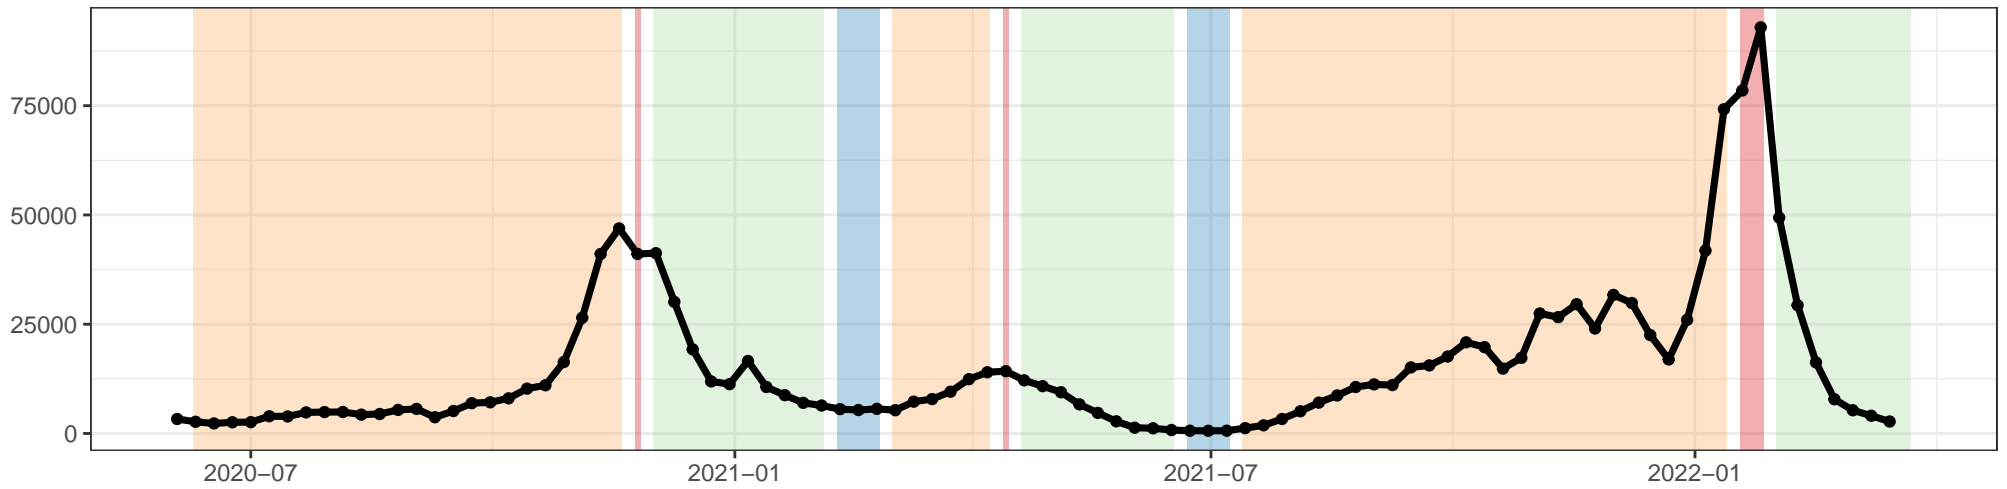

phase    increasing    decreasing    peak    nadir

\*Increasing/decreasing = Rt had a 90% probability  $\geq$  or  $\leq$  than 1.0.  
Wks b/w two increasing/decreasing phases  $\rightarrow$  classified as increasing/decreasing.  
Wks b/w increasing and decreasing phases = peaks; nadirs = wks b/w decreasing and increasing phases.

# Mississippi

## Rt with 90% CI, w/ phase categories

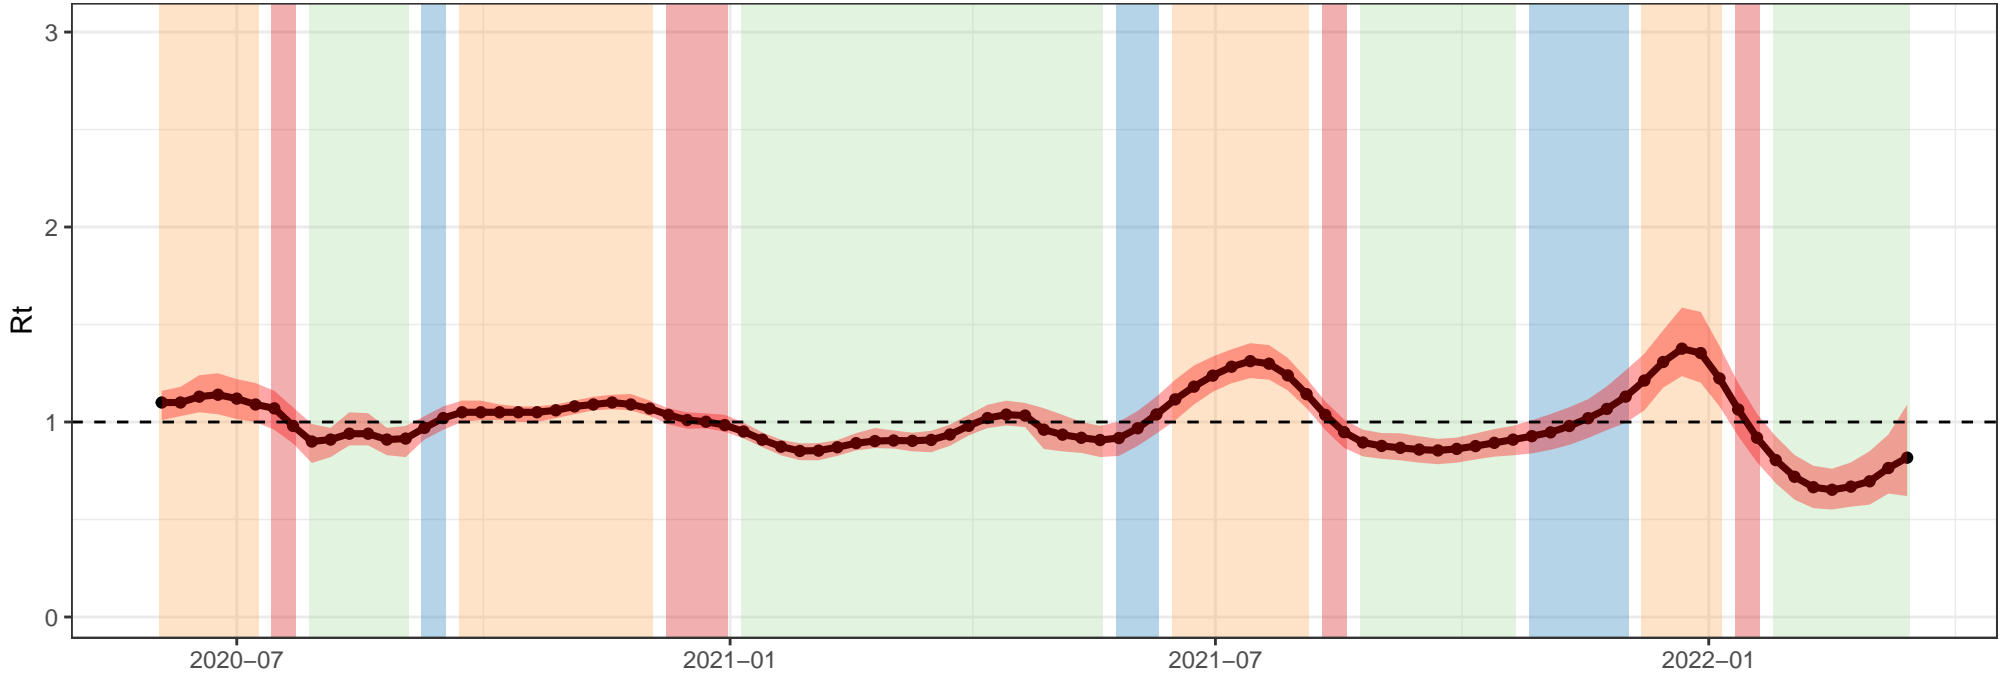

## Case counts w/ lagged phase categories\*

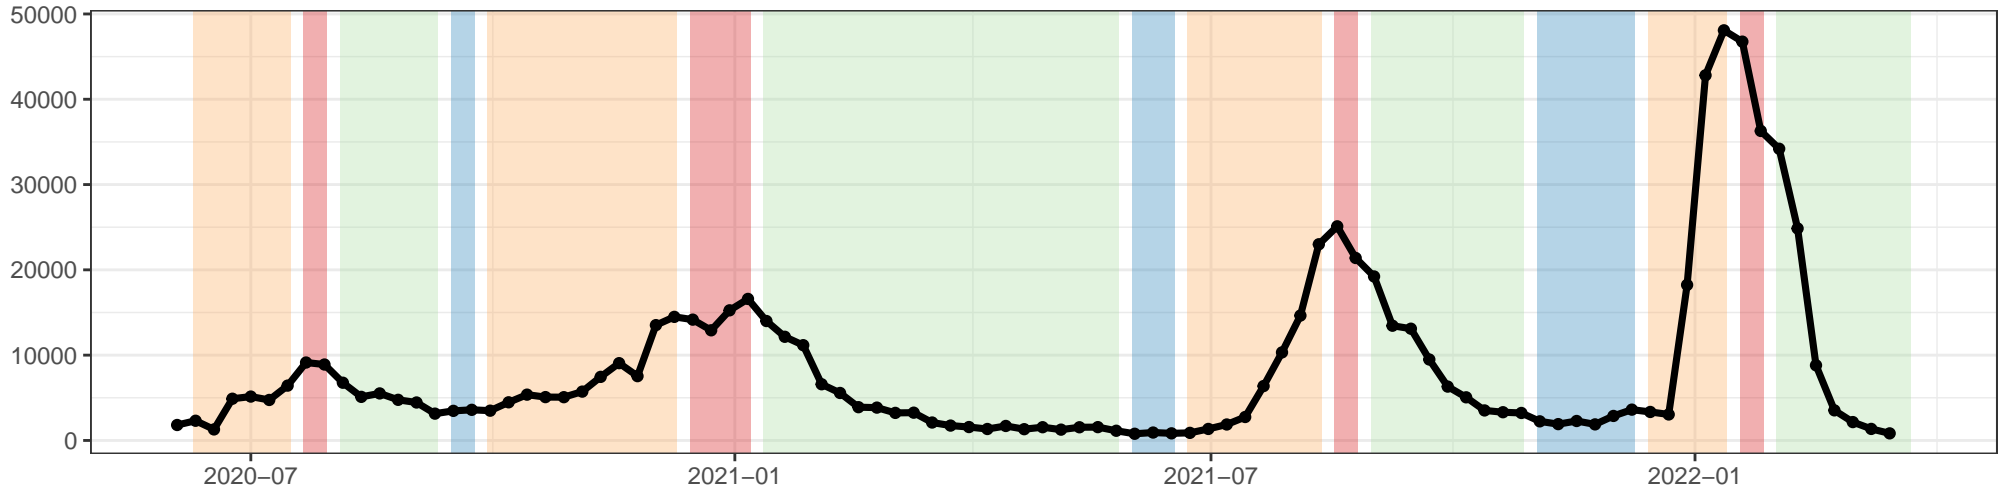

phase    increasing    decreasing    peak    nadir

\*Increasing/decreasing = Rt had a 90% probability  $\geq$  or  $\leq$  than 1.0.  
Wks b/w two increasing/decreasing phases  $\rightarrow$  classified as increasing/decreasing.  
Wks b/w increasing and decreasing phases = peaks; nadirs = wks b/w decreasing and increasing phases.



# Missouri

## Rt with 90% CI, w/ phase categories

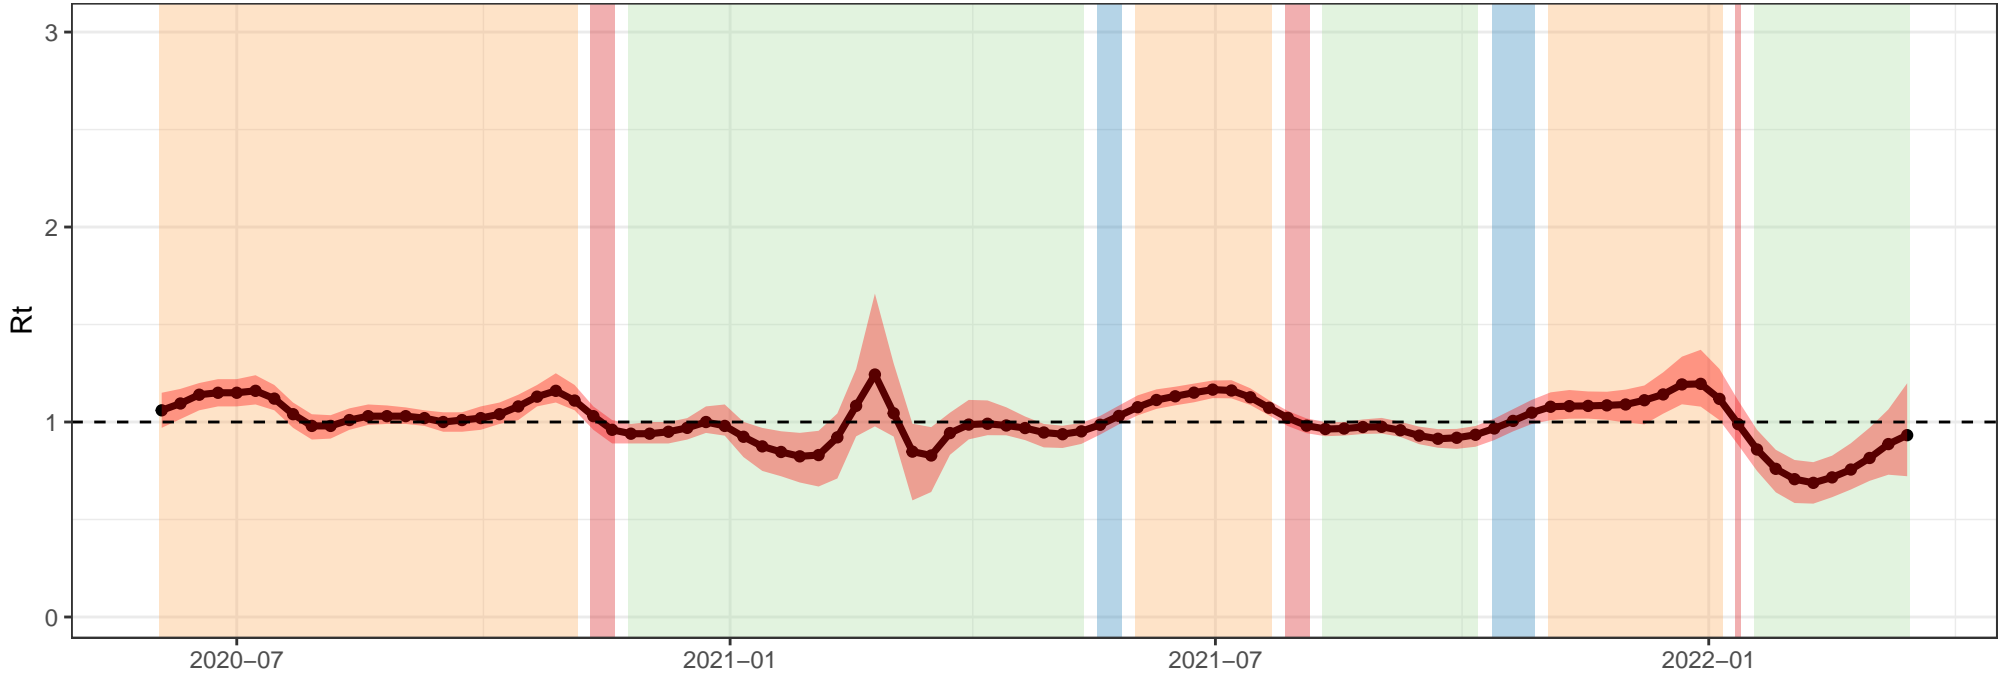

## Case counts w/ lagged phase categories\*

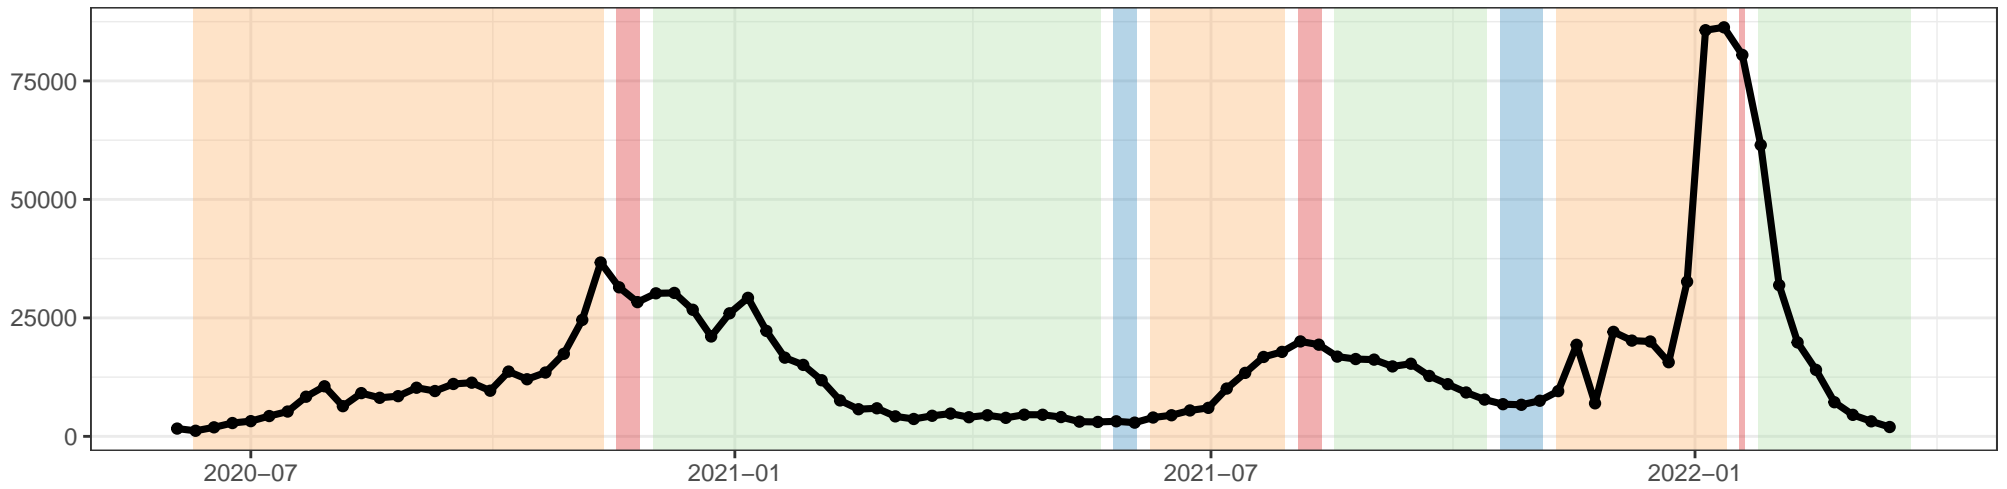

phase    increasing    decreasing    peak    nadir

\*Increasing/decreasing = Rt had a 90% probability  $\geq$  or  $\leq$  than 1.0.  
Wks b/w two increasing/decreasing phases  $\rightarrow$  classified as increasing/decreasing.  
Wks b/w increasing and decreasing phases = peaks; nadirs = wks b/w decreasing and increasing phases.

# Montana

## Rt with 90% CI, w/ phase categories

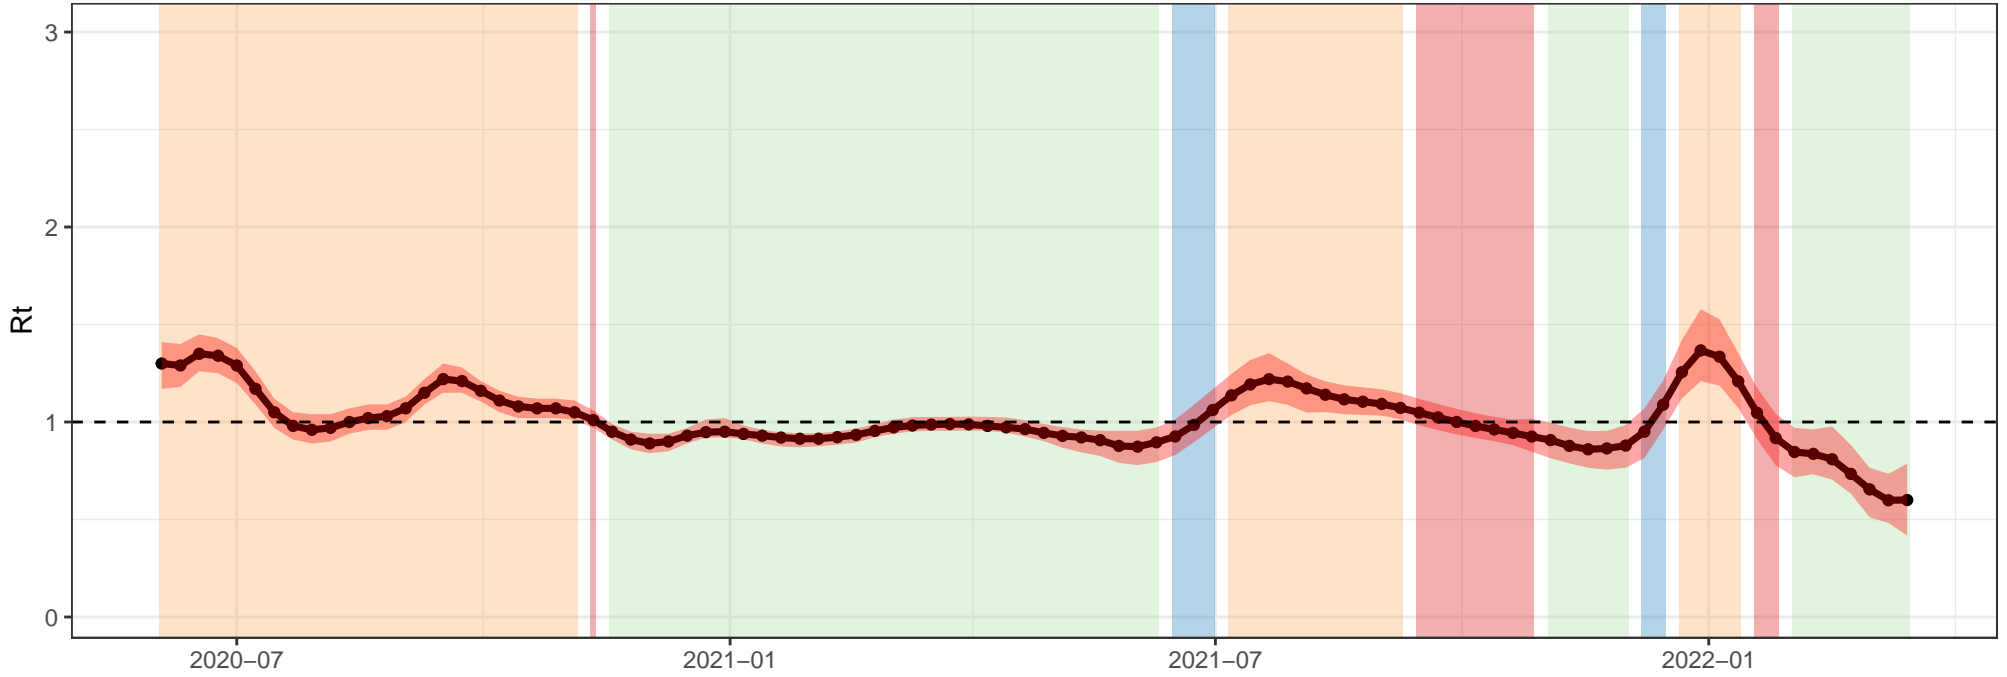

## Case counts w/ lagged phase categories\*

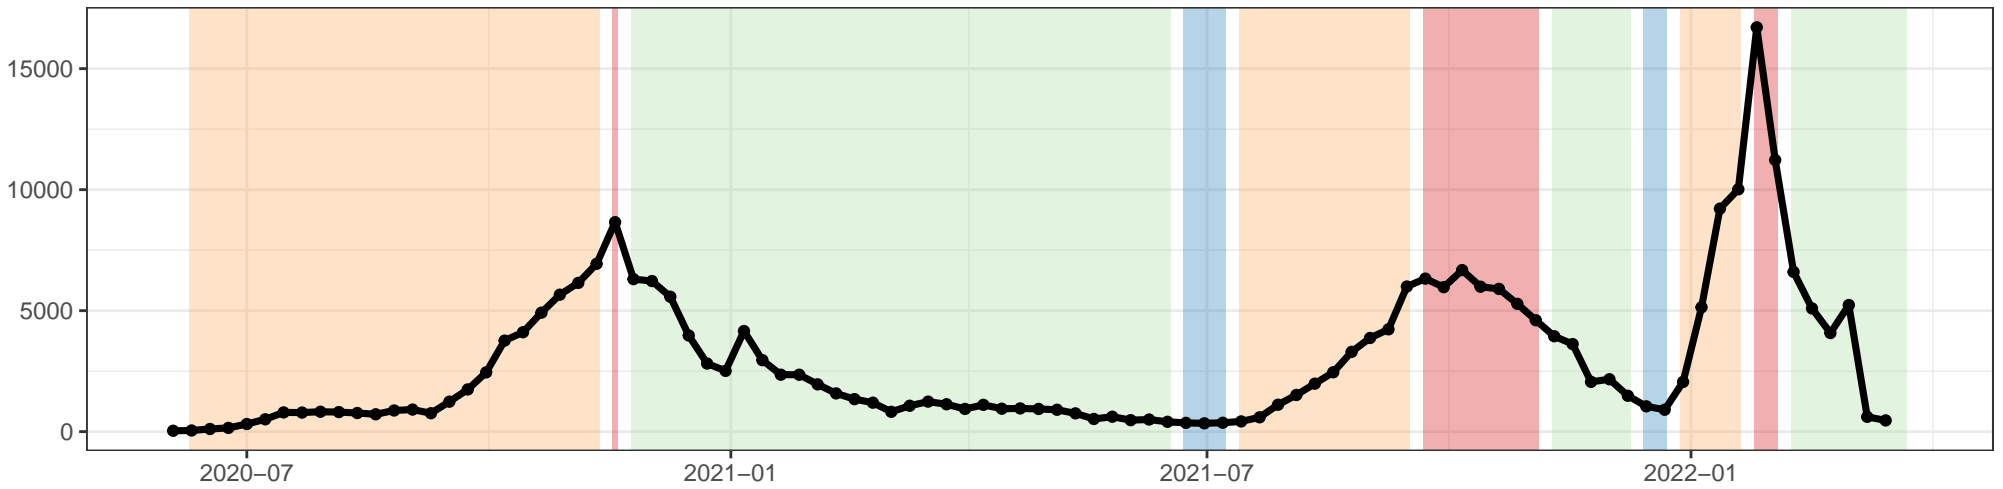

phase    increasing    decreasing    peak    nadir

\*Increasing/decreasing = Rt had a 90% probability  $\geq$  or  $\leq$  than 1.0.  
Wks b/w two increasing/decreasing phases  $\rightarrow$  classified as increasing/decreasing.  
Wks b/w increasing and decreasing phases = peaks; nadirs = wks b/w decreasing and increasing phases.

# Nebraska

## Rt with 90% CI, w/ phase categories

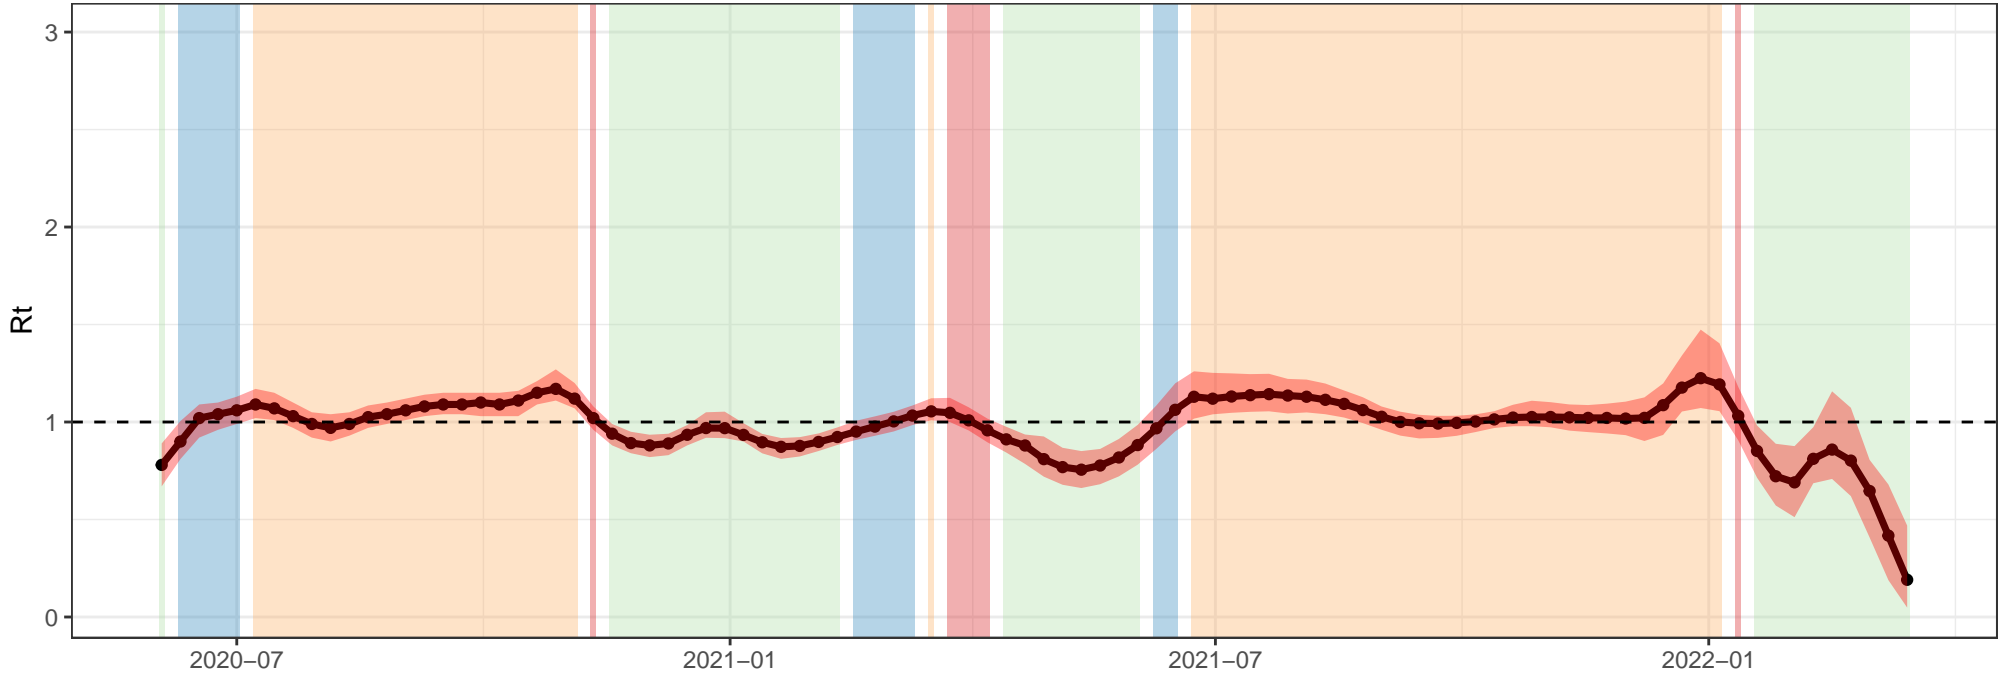

## Case counts w/ lagged phase categories\*

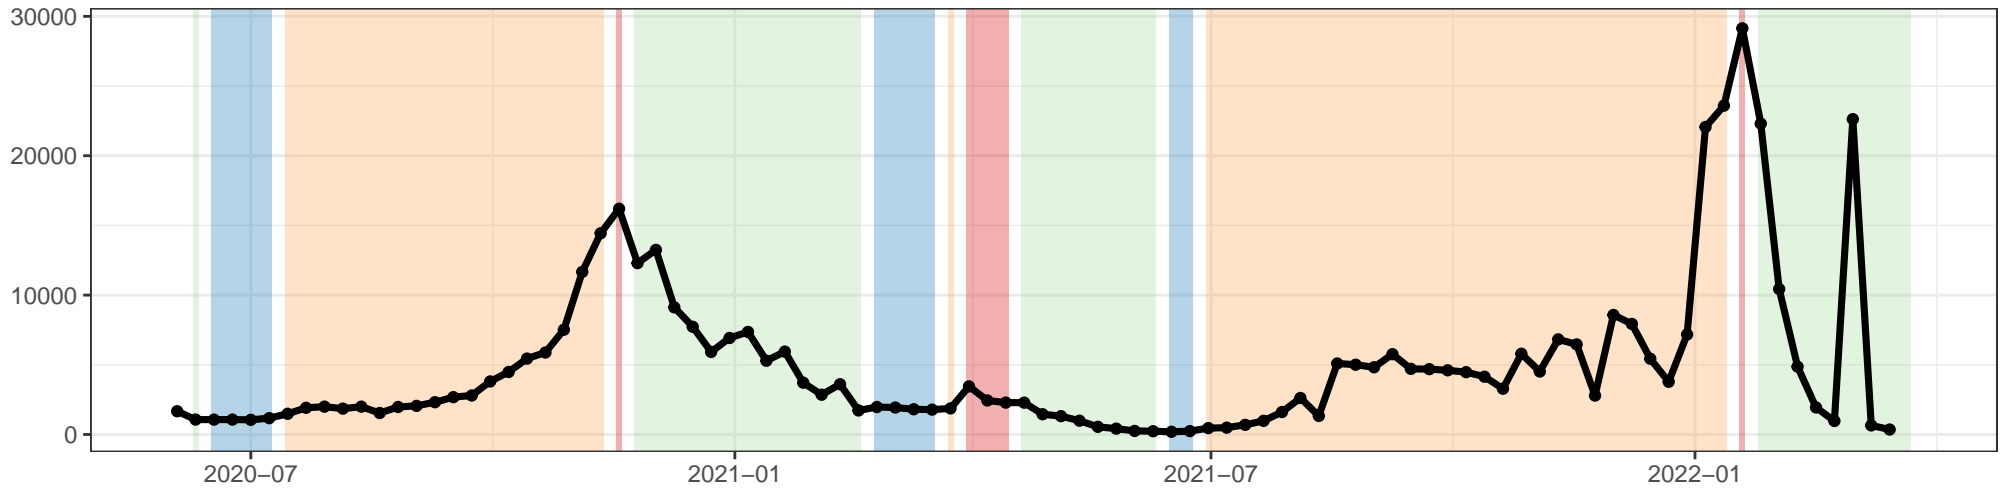

phase    increasing    decreasing    peak    nadir

\*Increasing/decreasing = Rt had a 90% probability  $\geq$  or  $\leq$  than 1.0.  
Wks b/w two increasing/decreasing phases  $\rightarrow$  classified as increasing/decreasing.  
Wks b/w increasing and decreasing phases = peaks; nadirs = wks b/w decreasing and increasing phases.

# Nevada

## Rt with 90% CI, w/ phase categories

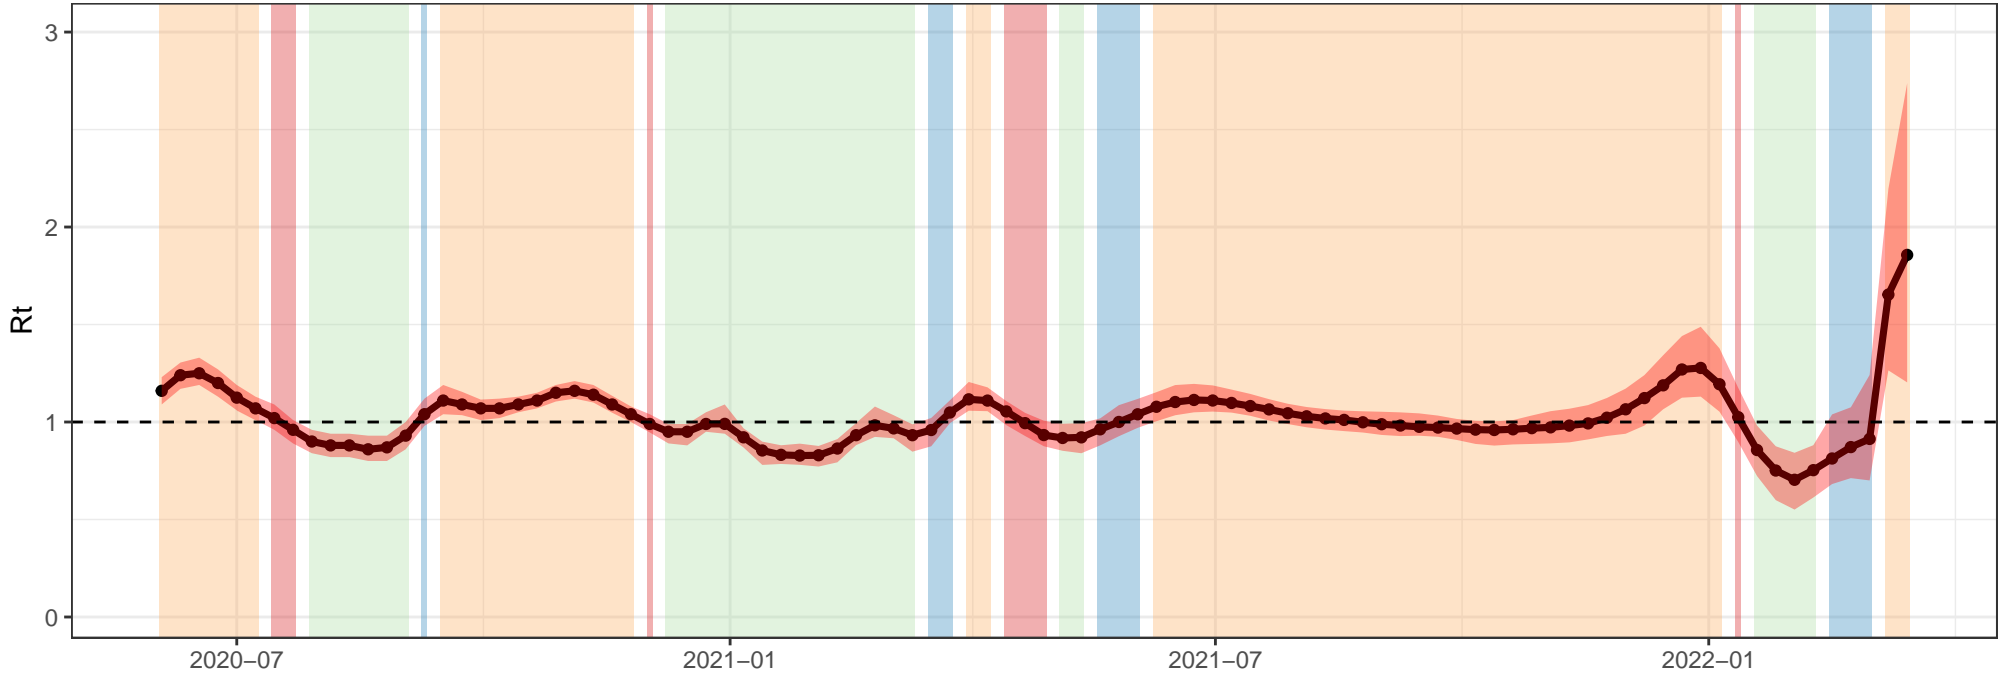

## Case counts w/ lagged phase categories\*

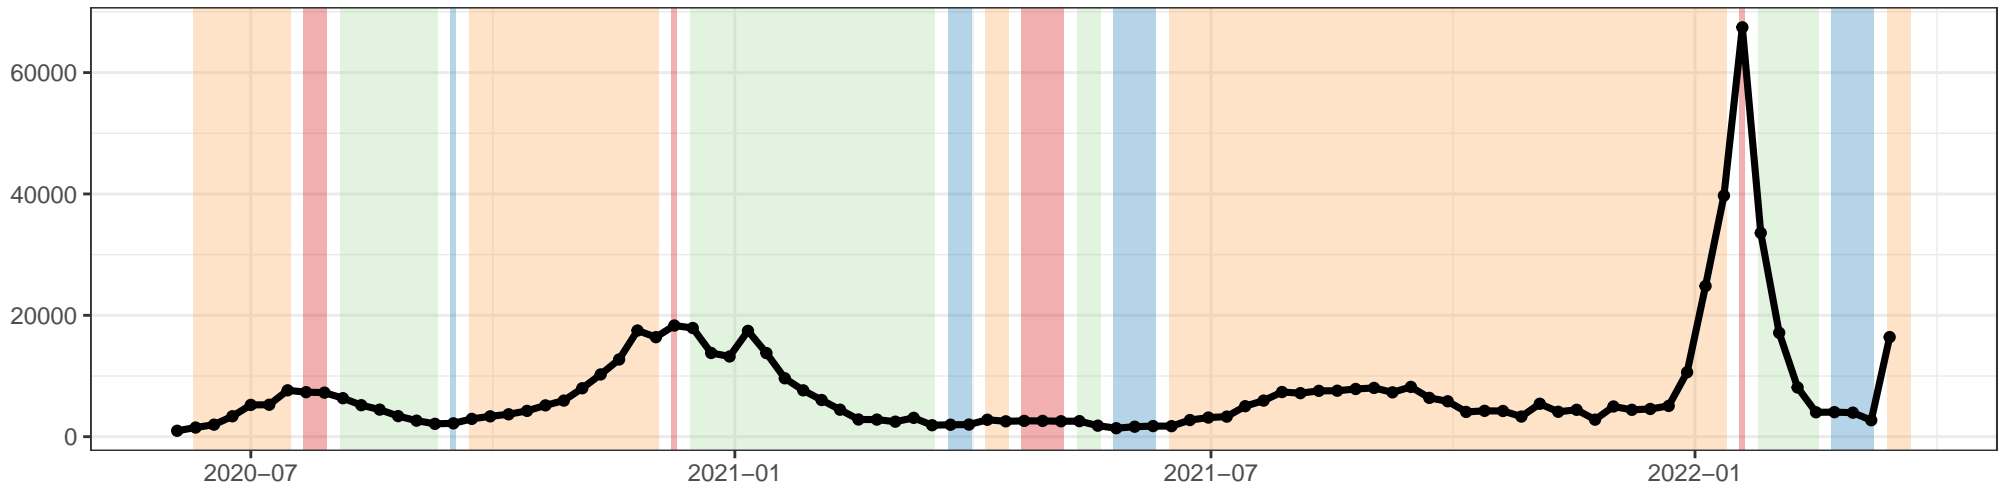

phase    increasing    decreasing    peak    nadir

\*Increasing/decreasing = Rt had a 90% probability  $\geq$  or  $\leq$  than 1.0.  
Wks b/w two increasing/decreasing phases  $\rightarrow$  classified as increasing/decreasing.  
Wks b/w increasing and decreasing phases = peaks; nadirs = wks b/w decreasing and increasing phases.

# New Hampshire

## Rt with 90% CI, w/ phase categories

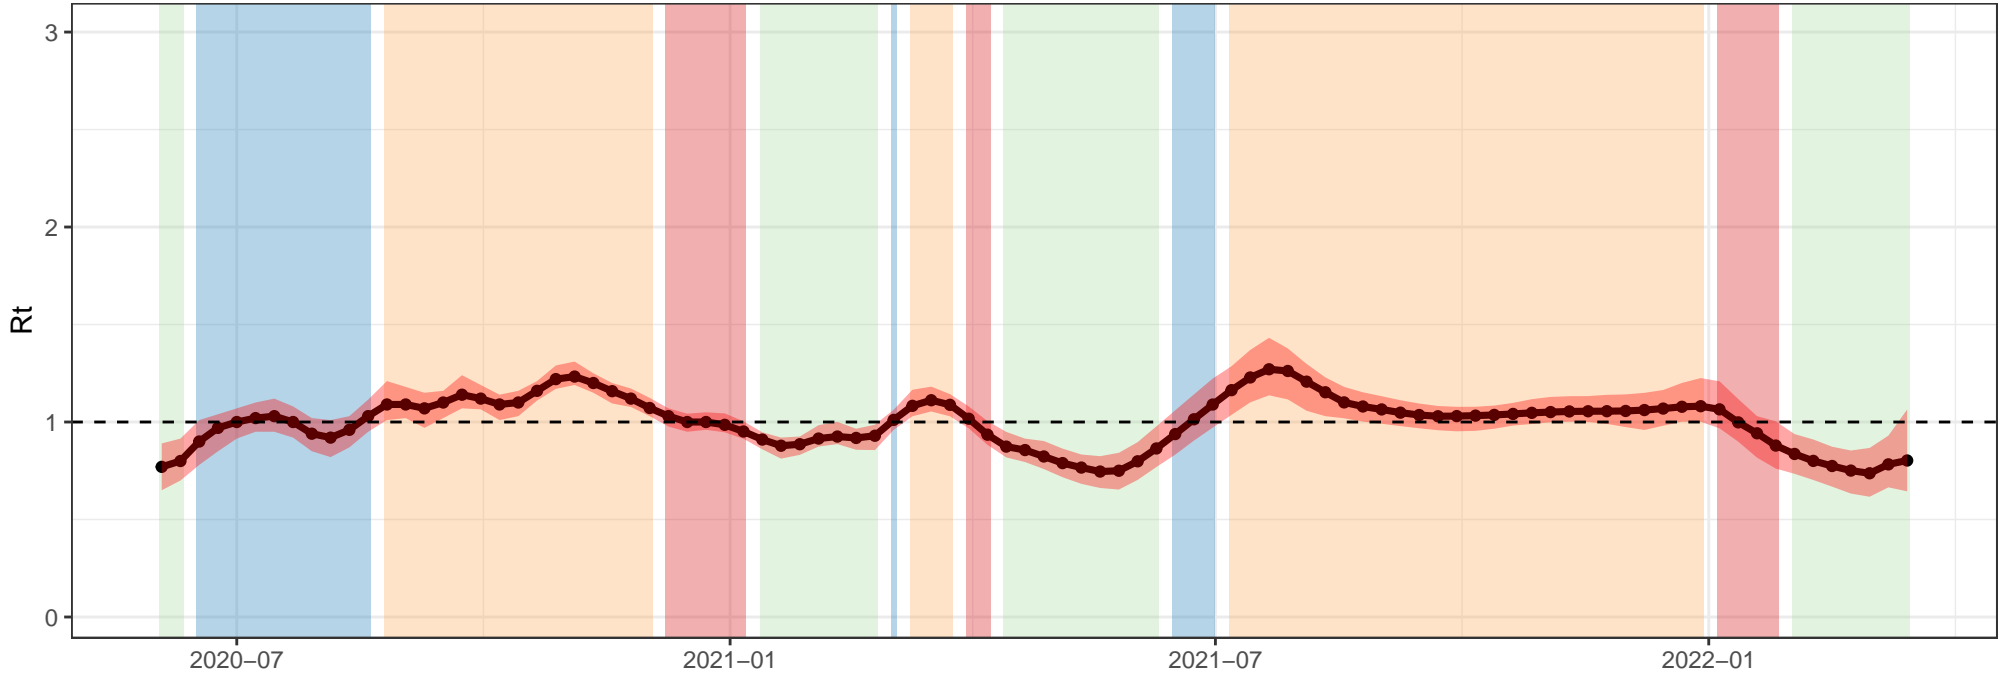

## Case counts w/ lagged phase categories\*

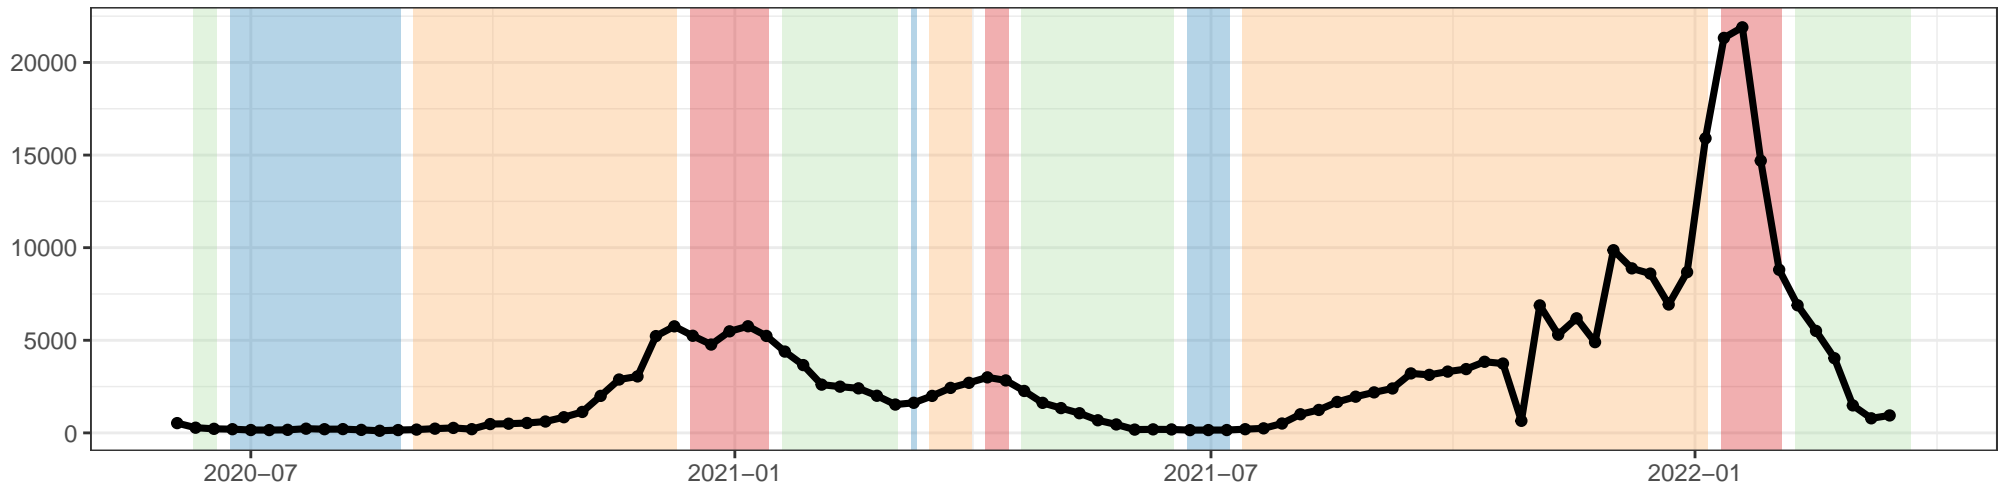

phase    increasing    decreasing    peak    nadir

\*Increasing/decreasing = Rt had a 90% probability  $\geq$  or  $\leq$  than 1.0.  
Wks b/w two increasing/decreasing phases  $\rightarrow$  classified as increasing/decreasing.  
Wks b/w increasing and decreasing phases = peaks; nadirs = wks b/w decreasing and increasing phases.

# New Jersey

## Rt with 90% CI, w/ phase categories

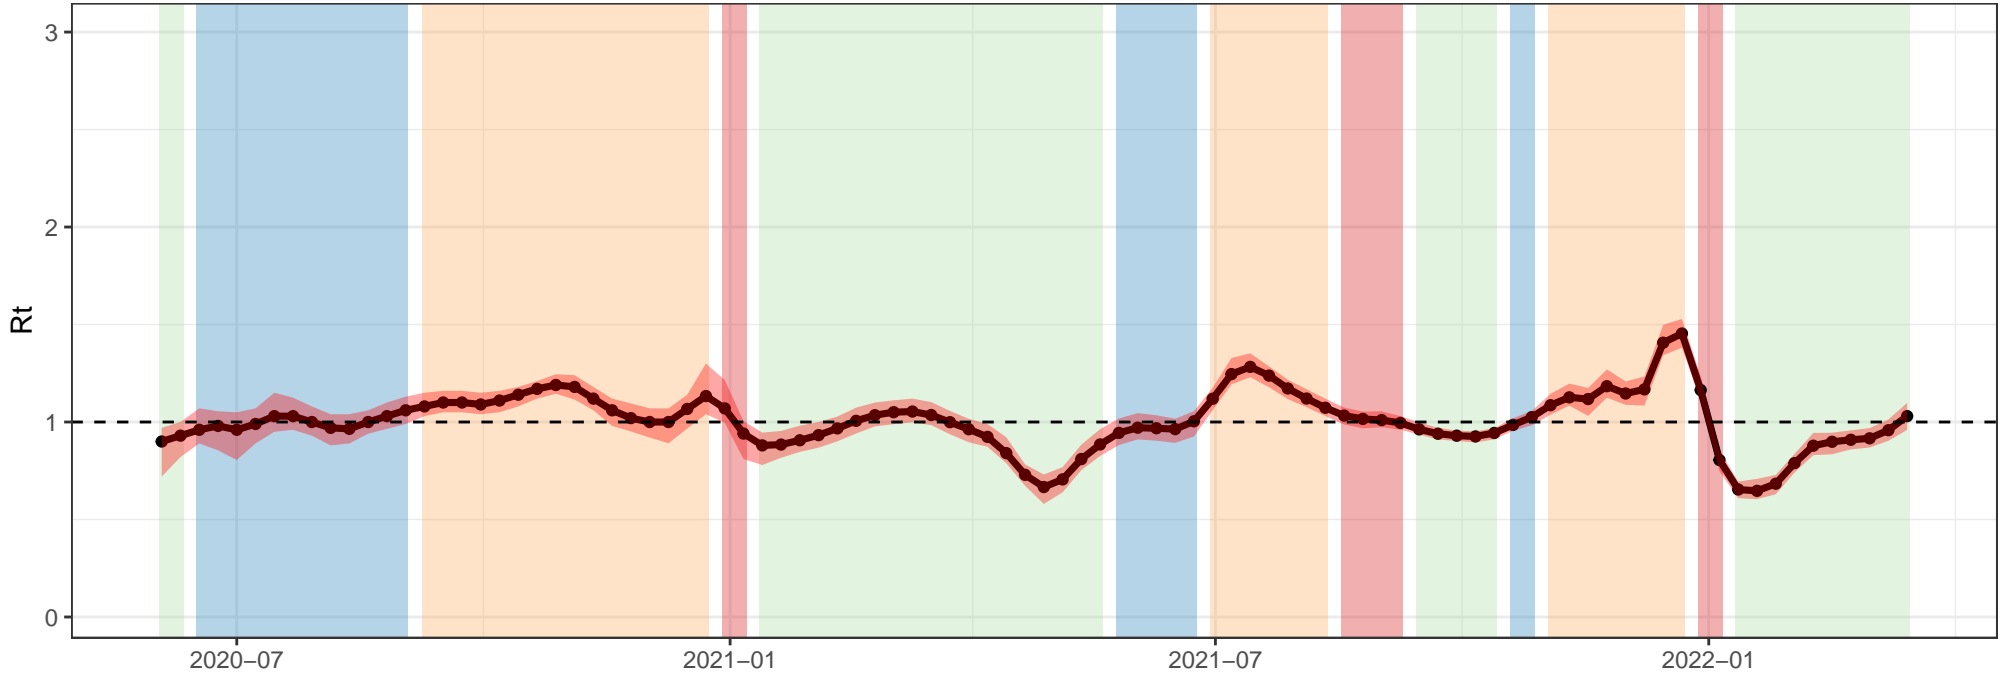

## Case counts w/ lagged phase categories\*

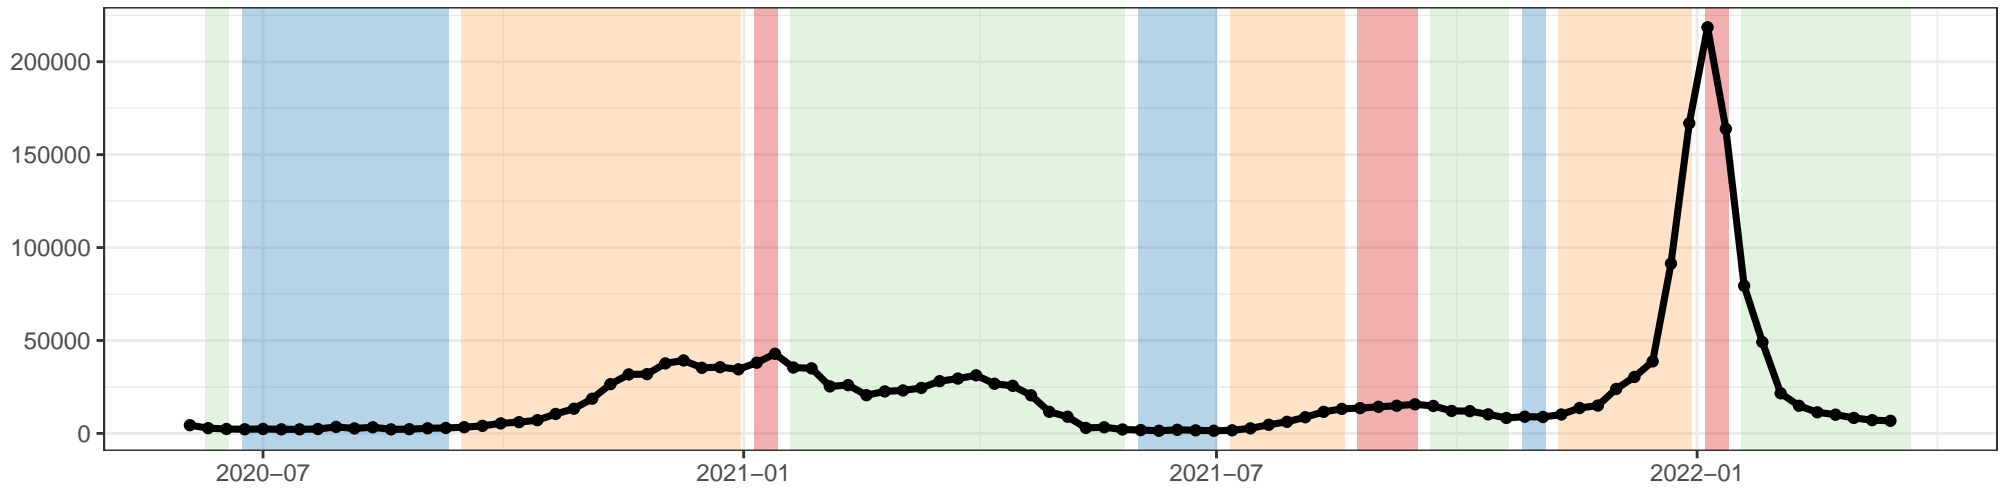

phase    increasing    decreasing    peak    nadir

\*Increasing/decreasing = Rt had a 90% probability  $\geq$  or  $\leq$  than 1.0.  
Wks b/w two increasing/decreasing phases  $\rightarrow$  classified as increasing/decreasing.  
Wks b/w increasing and decreasing phases = peaks; nadirs = wks b/w decreasing and increasing phases.

# New Mexico

## Rt with 90% CI, w/ phase categories

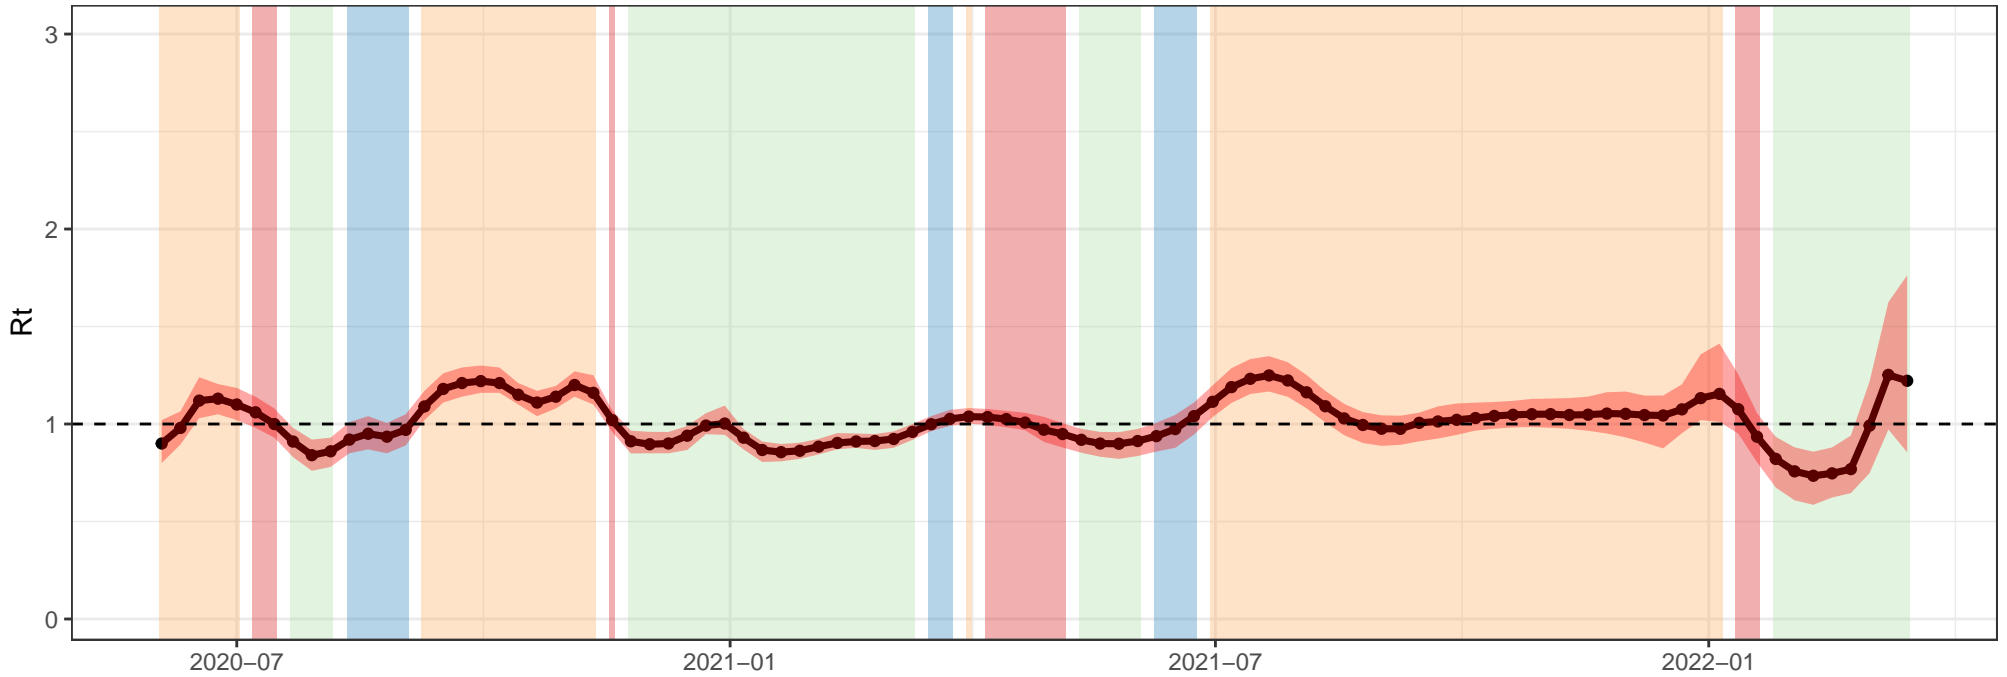

## Case counts w/ lagged phase categories\*

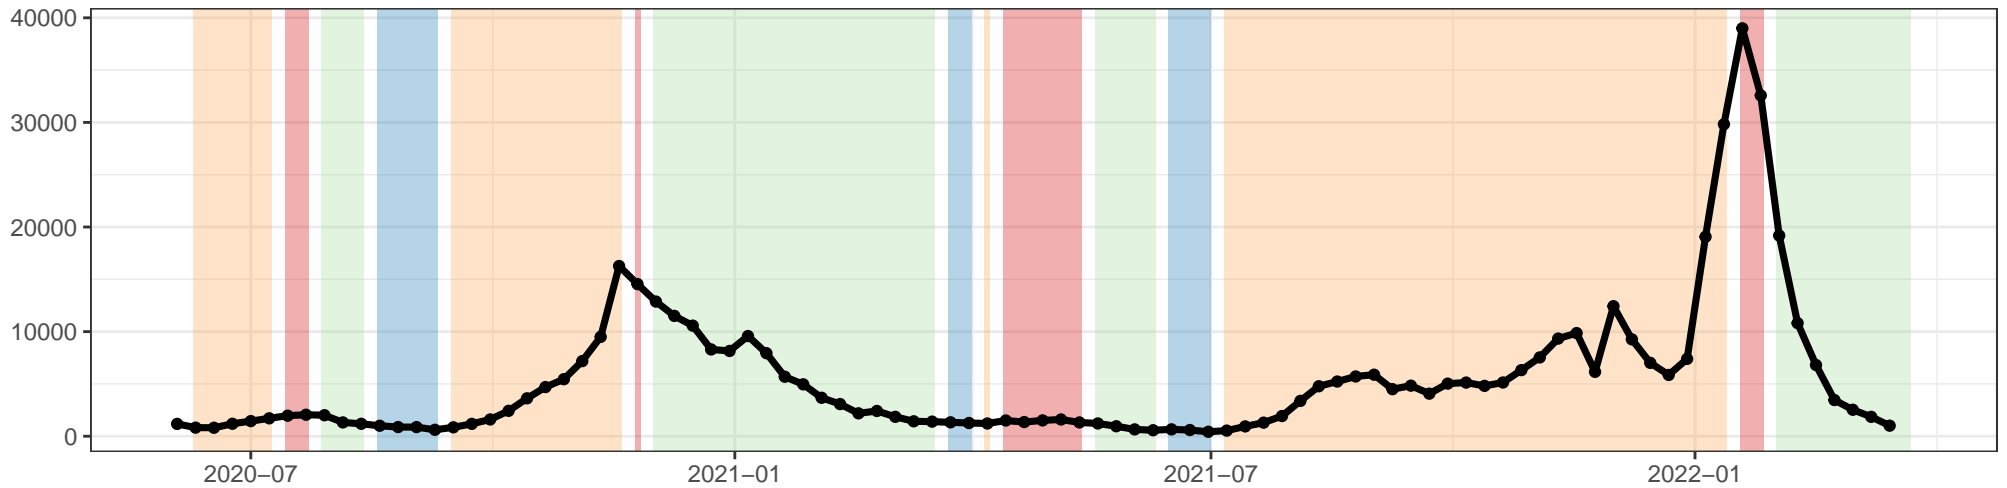

phase    increasing    decreasing    peak    nadir

\*Increasing/decreasing = Rt had a 90% probability  $\geq$  or  $\leq$  than 1.0.  
Wks b/w two increasing/decreasing phases  $\rightarrow$  classified as increasing/decreasing.  
Wks b/w increasing and decreasing phases = peaks; nadirs = wks b/w decreasing and increasing phases.

# New York

## Rt with 90% CI, w/ phase categories

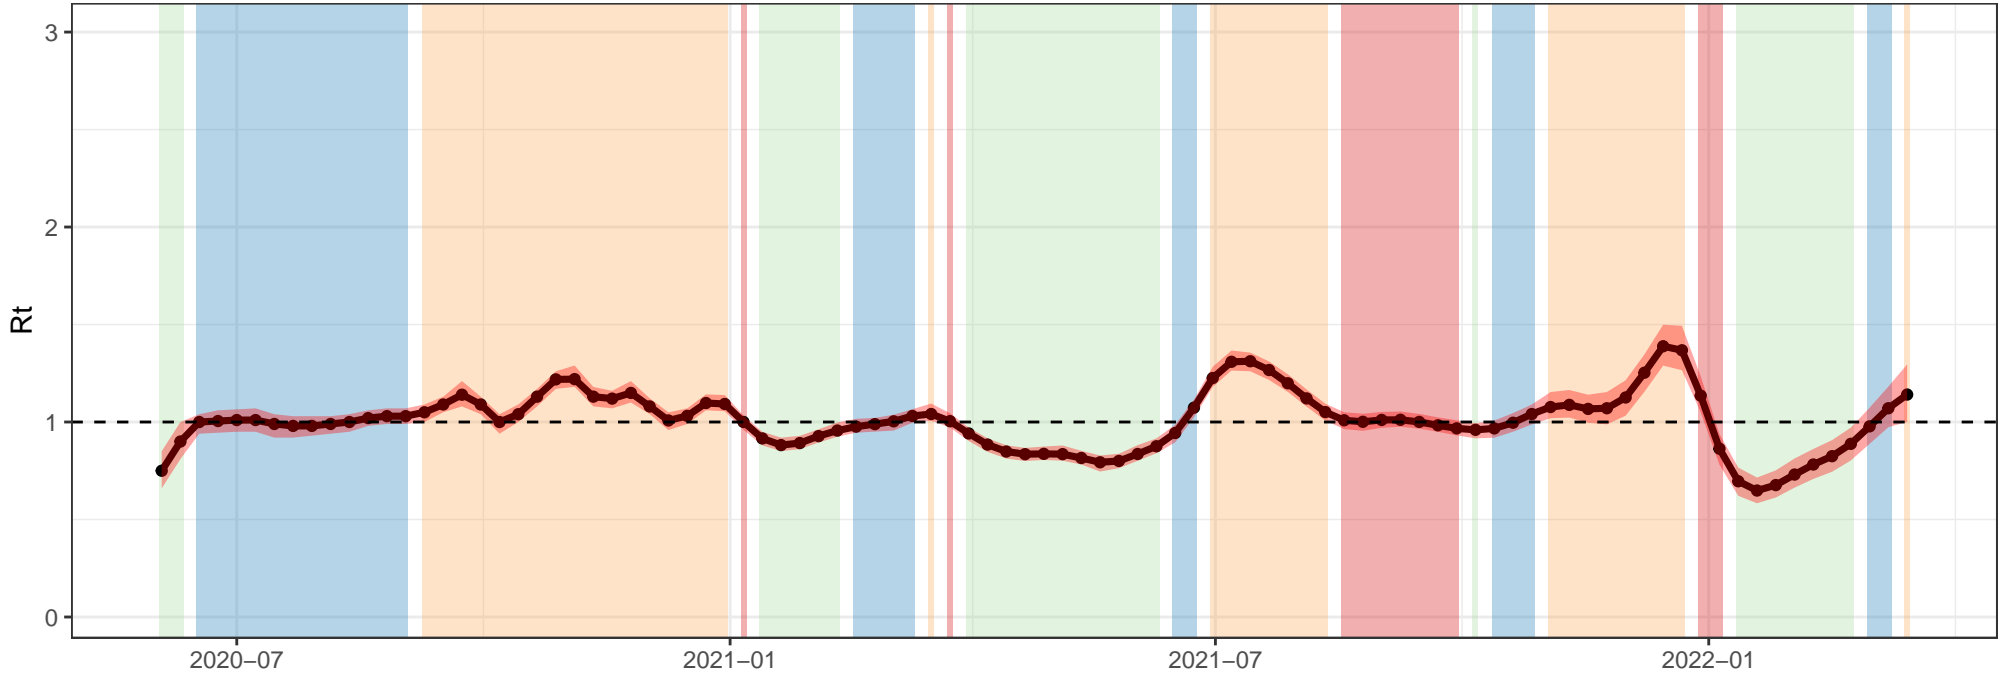

## Case counts w/ lagged phase categories\*

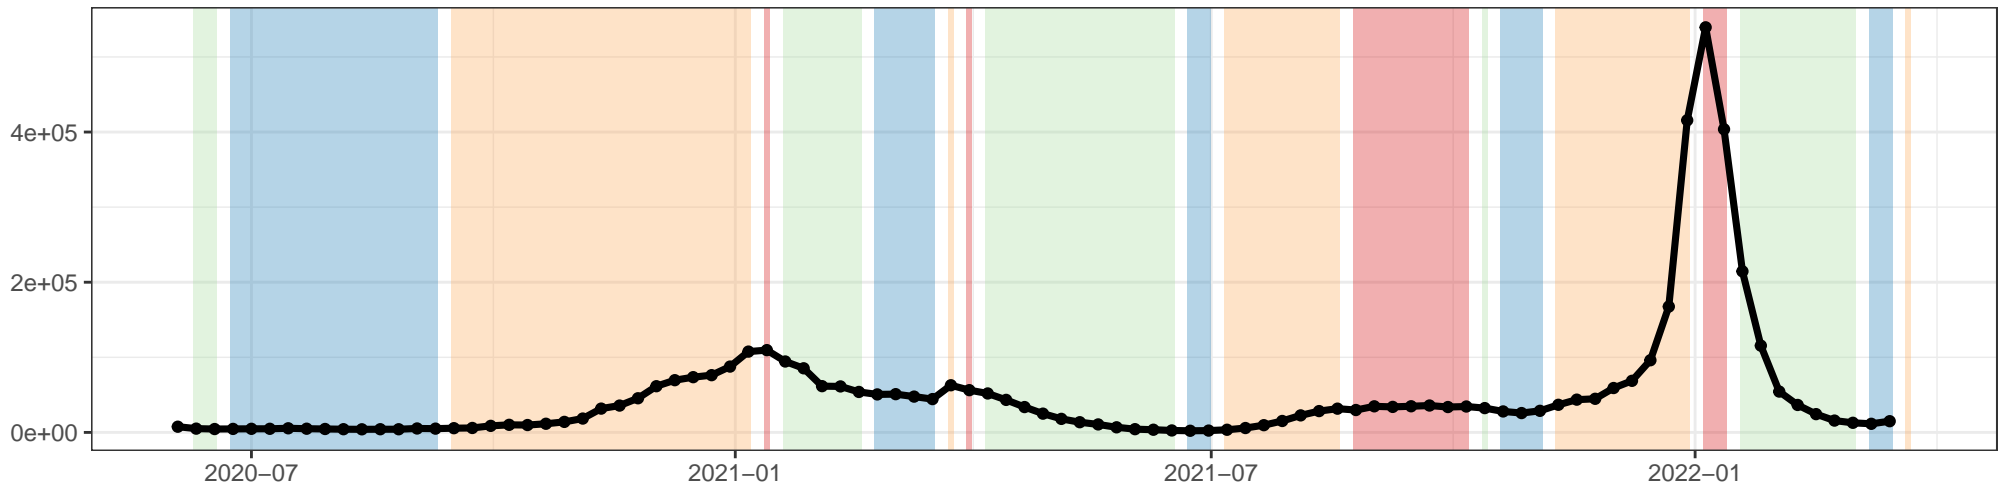

phase    increasing    decreasing    peak    nadir

\*Increasing/decreasing = Rt had a 90% probability  $\geq$  or  $\leq$  than 1.0.  
Wks b/w two increasing/decreasing phases  $\rightarrow$  classified as increasing/decreasing.  
Wks b/w increasing and decreasing phases = peaks; nadirs = wks b/w decreasing and increasing phases.



# North Carolina

## Rt with 90% CI, w/ phase categories

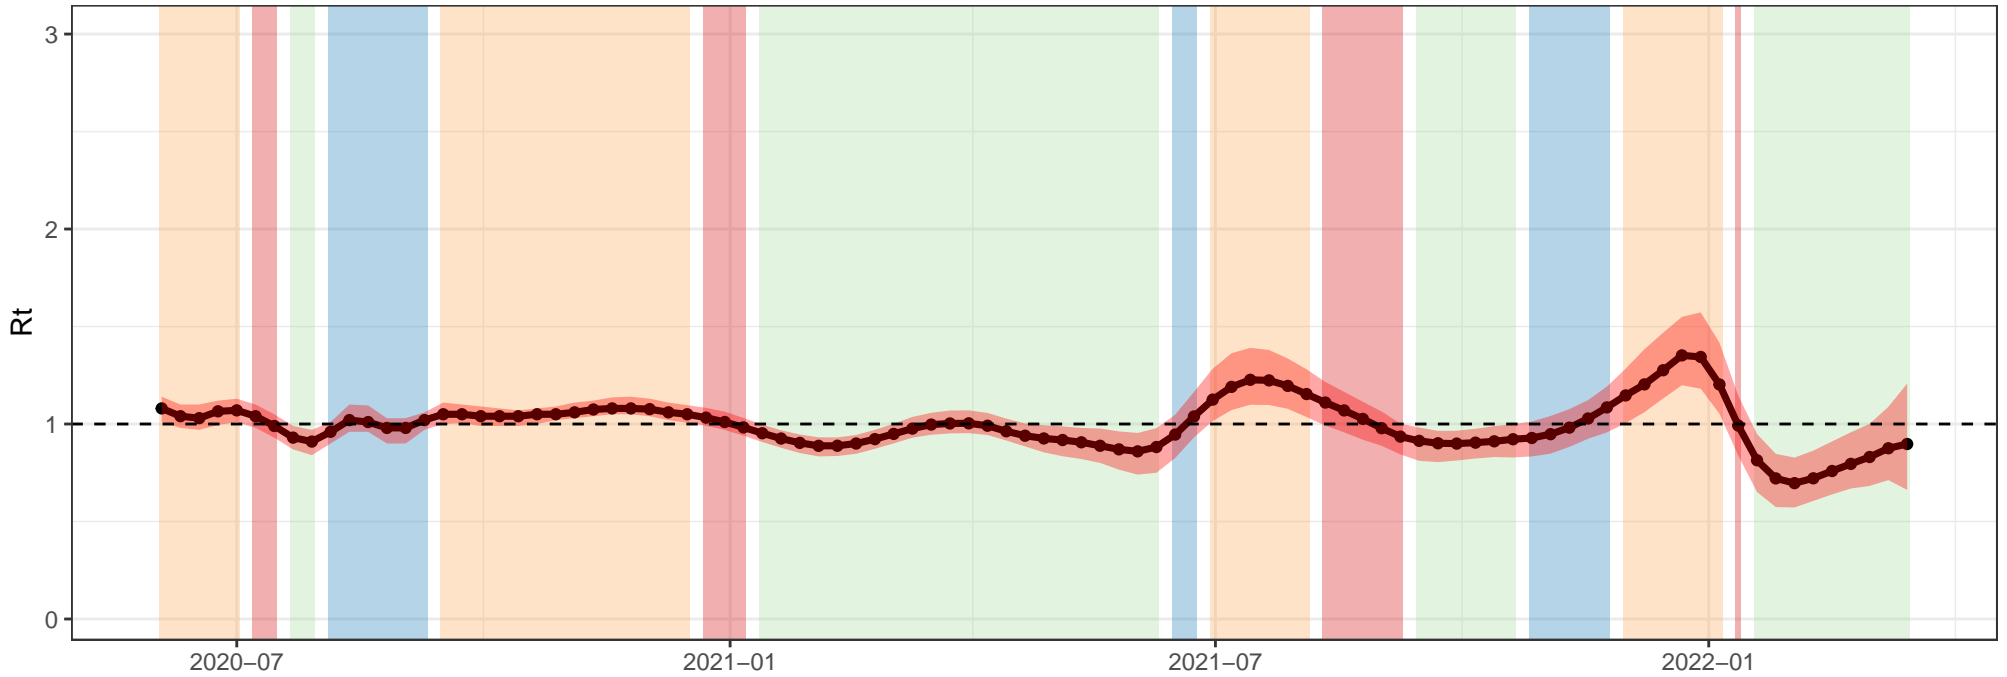

## Case counts w/ lagged phase categories\*

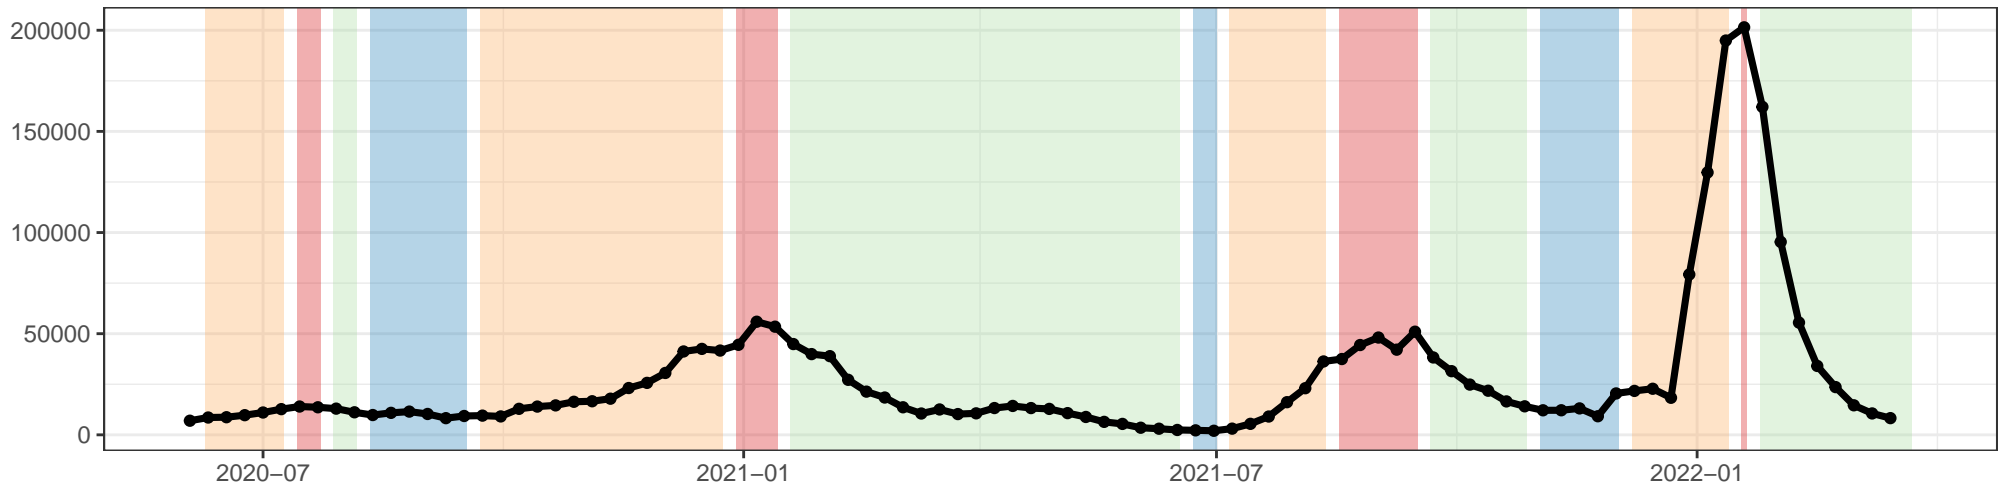

phase    increasing    decreasing    peak    nadir

\*Increasing/decreasing = Rt had a 90% probability  $\geq$  or  $\leq$  than 1.0.  
Wks b/w two increasing/decreasing phases  $\rightarrow$  classified as increasing/decreasing.  
Wks b/w increasing and decreasing phases = peaks; nadirs = wks b/w decreasing and increasing phases.

# North Dakota

## Rt with 90% CI, w/ phase categories

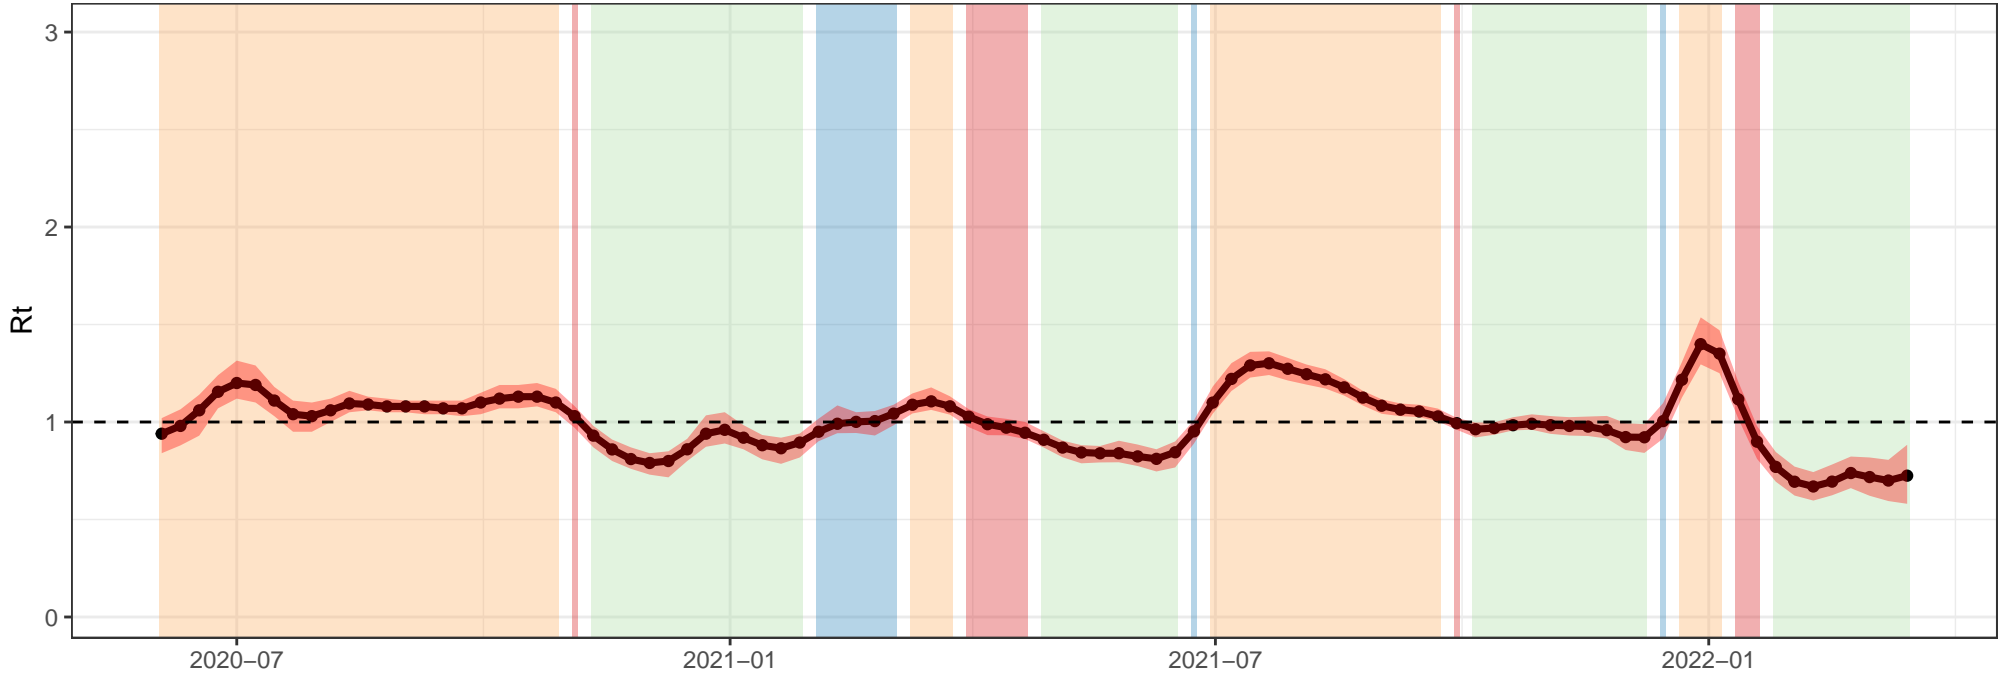

## Case counts w/ lagged phase categories\*

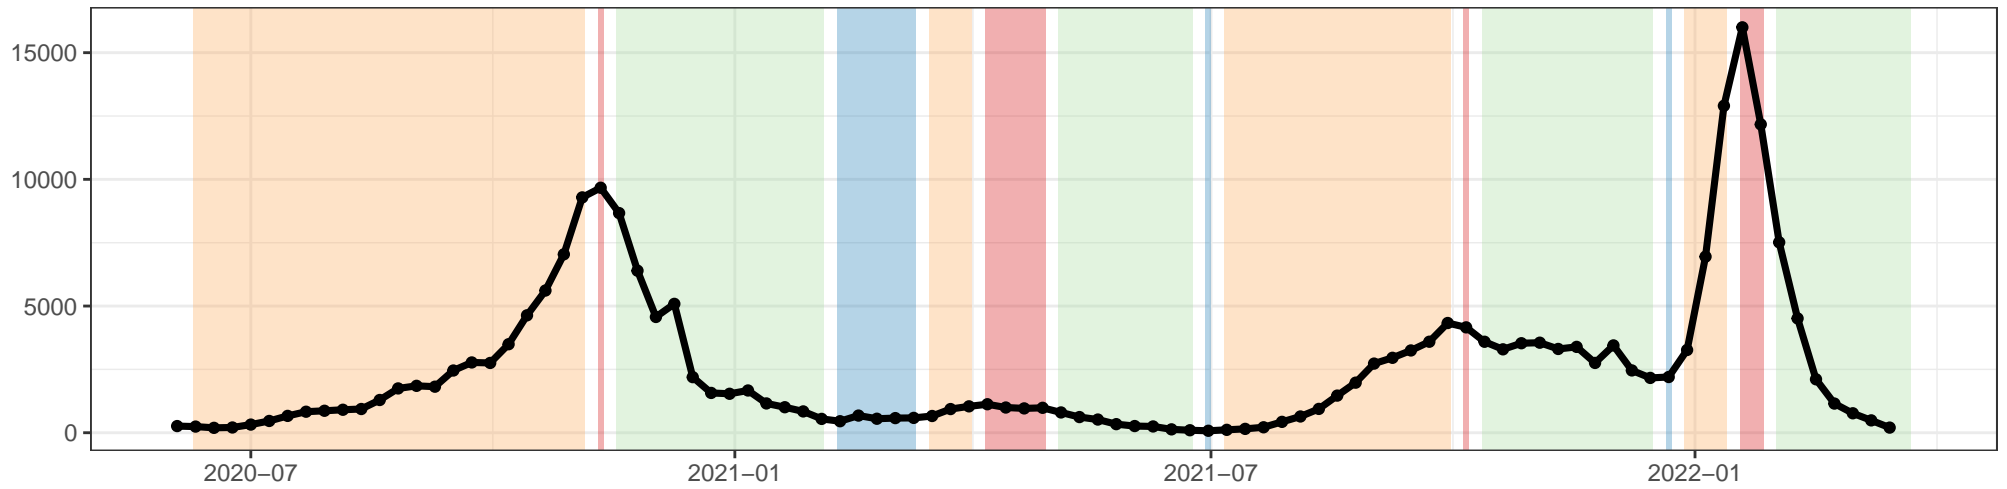

phase    increasing    decreasing    peak    nadir

\*Increasing/decreasing = Rt had a 90% probability  $\geq$  or  $\leq$  than 1.0.  
Wks b/w two increasing/decreasing phases  $\rightarrow$  classified as increasing/decreasing.  
Wks b/w increasing and decreasing phases = peaks; nadirs = wks b/w decreasing and increasing phases.

# Ohio

## Rt with 90% CI, w/ phase categories

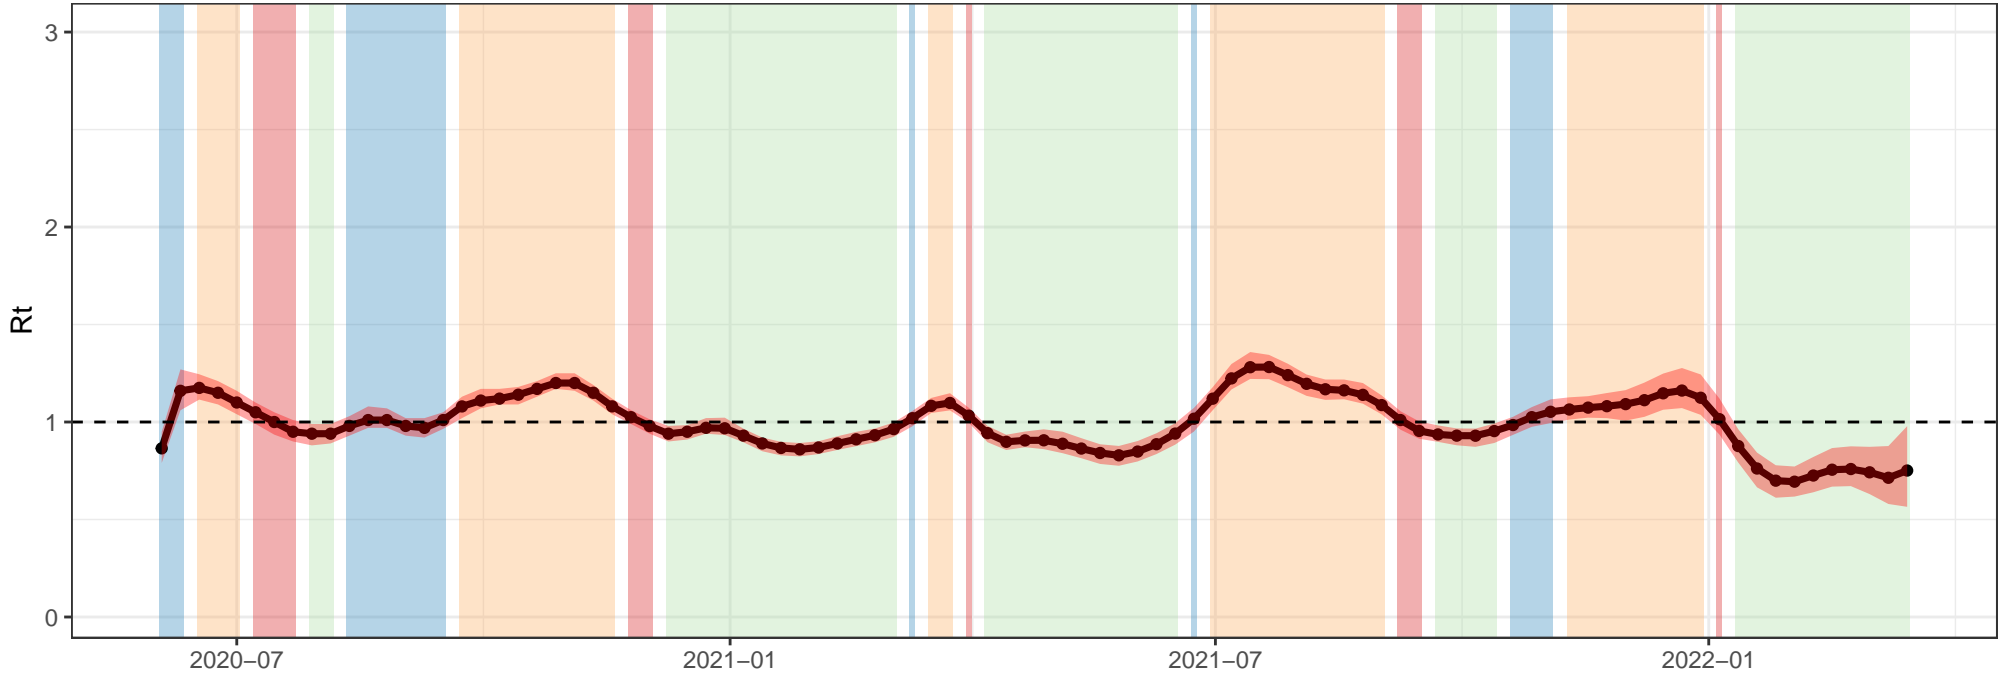

## Case counts w/ lagged phase categories\*

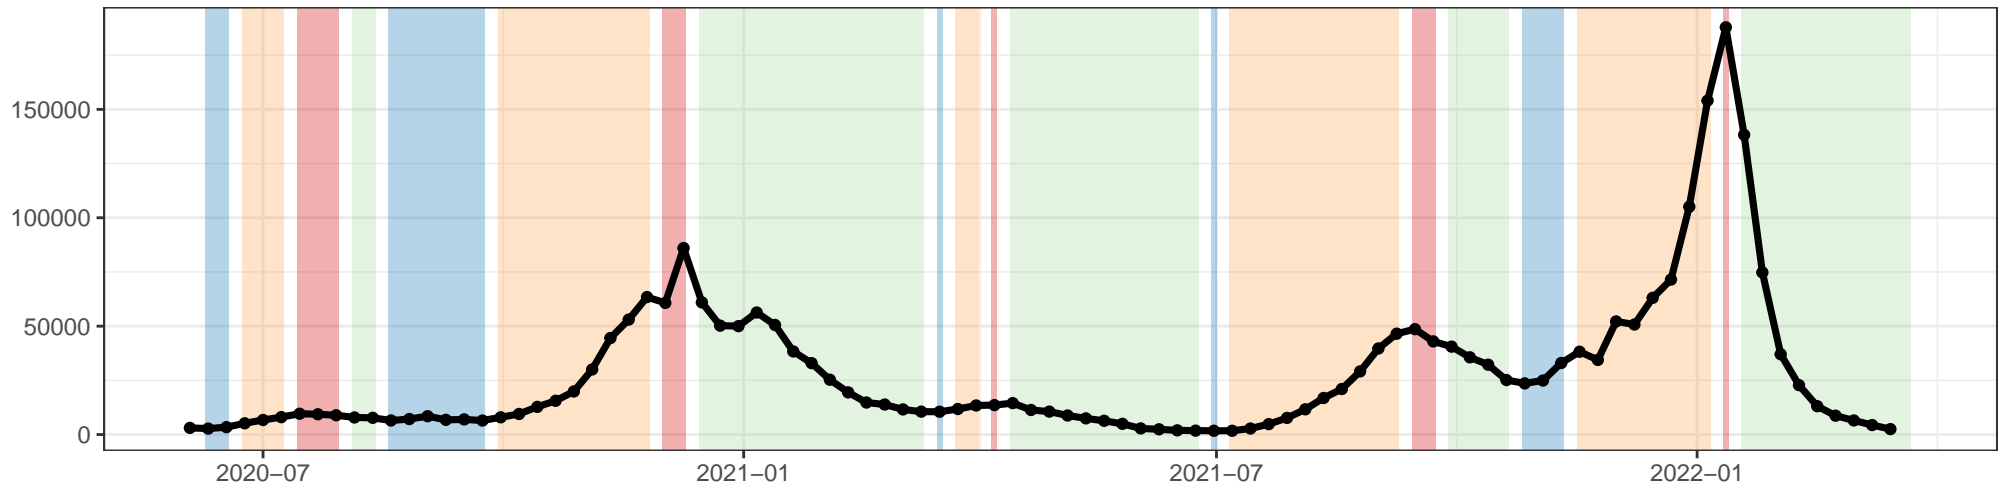

phase    increasing    decreasing    peak    nadir

\*Increasing/decreasing = Rt had a 90% probability  $\geq$  or  $\leq$  than 1.0.  
Wks b/w two increasing/decreasing phases  $\rightarrow$  classified as increasing/decreasing.  
Wks b/w increasing and decreasing phases = peaks; nadirs = wks b/w decreasing and increasing phases.

# Oklahoma

## Rt with 90% CI, w/ phase categories

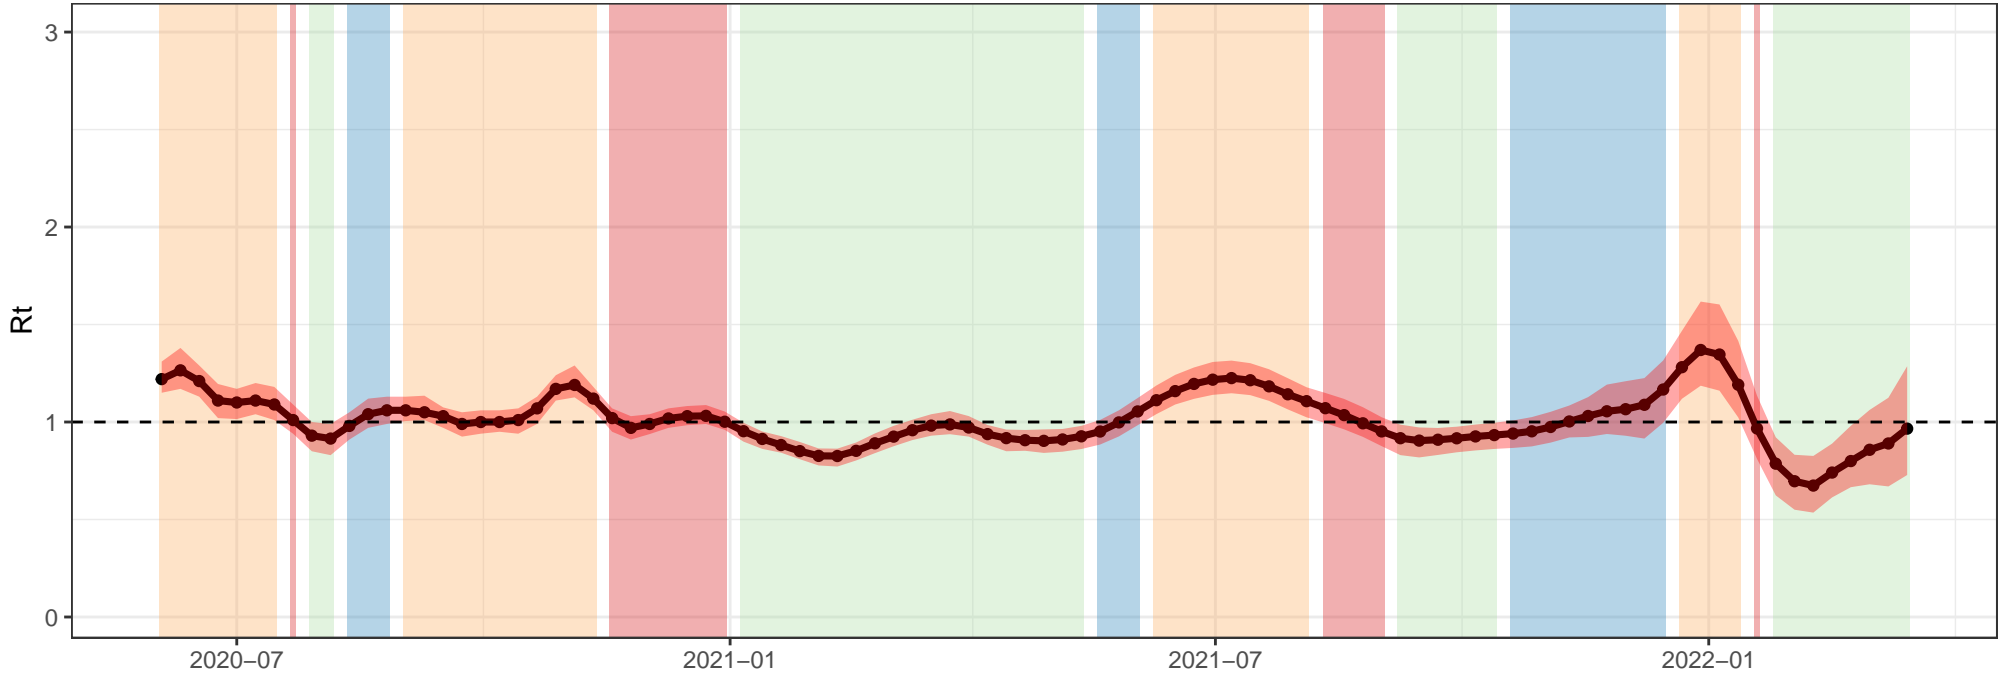

## Case counts w/ lagged phase categories\*

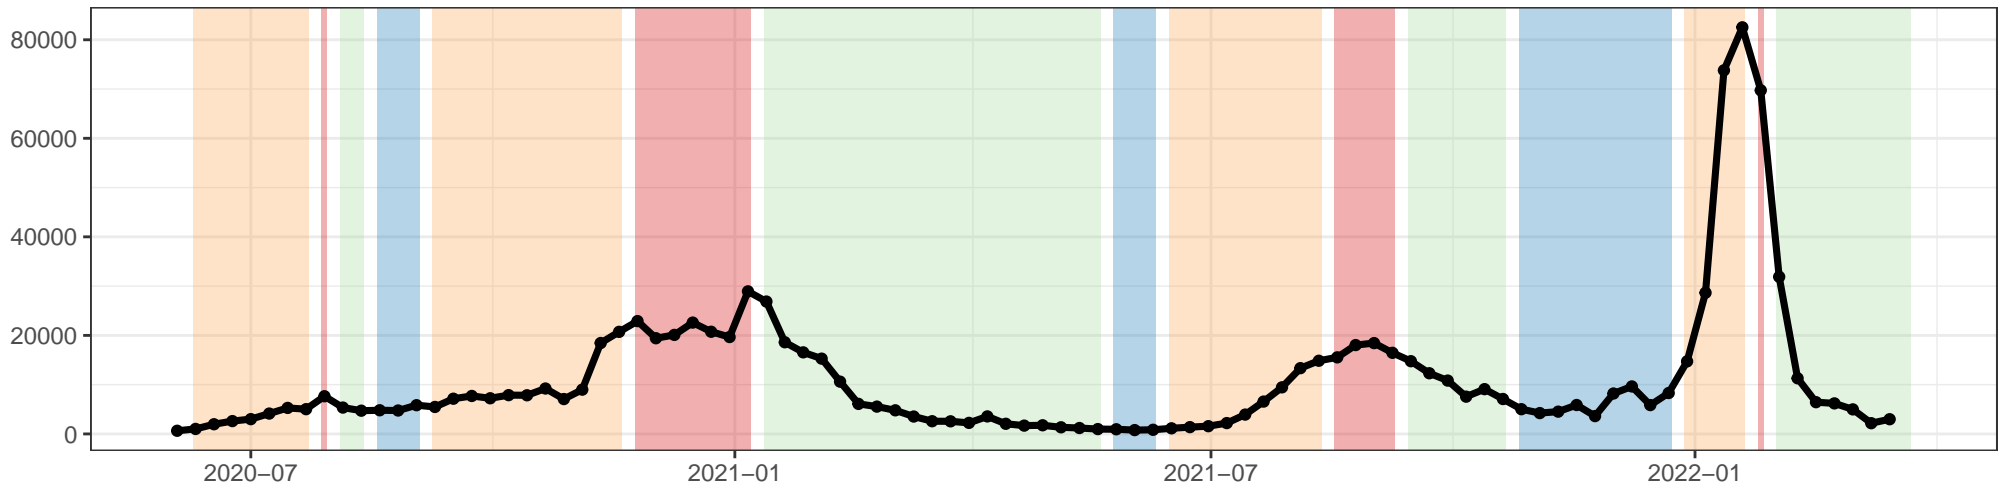

phase    increasing    decreasing    peak    nadir

\*Increasing/decreasing = Rt had a 90% probability  $\geq$  or  $\leq$  than 1.0.  
Wks b/w two increasing/decreasing phases  $\rightarrow$  classified as increasing/decreasing.  
Wks b/w increasing and decreasing phases = peaks; nadirs = wks b/w decreasing and increasing phases.

# Oregon

## Rt with 90% CI, w/ phase categories

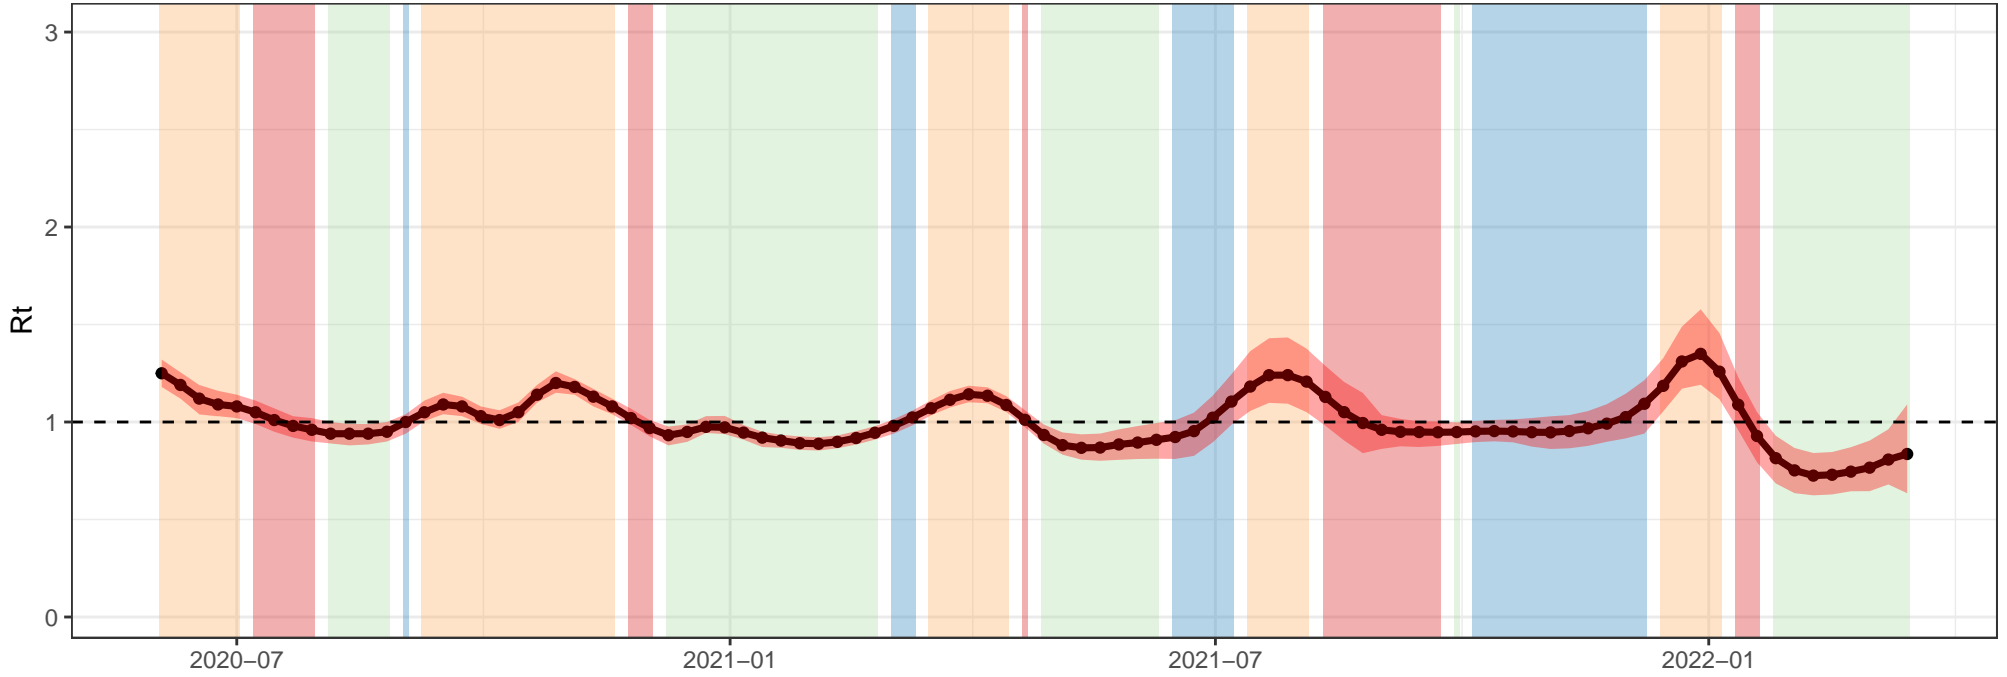

## Case counts w/ lagged phase categories\*

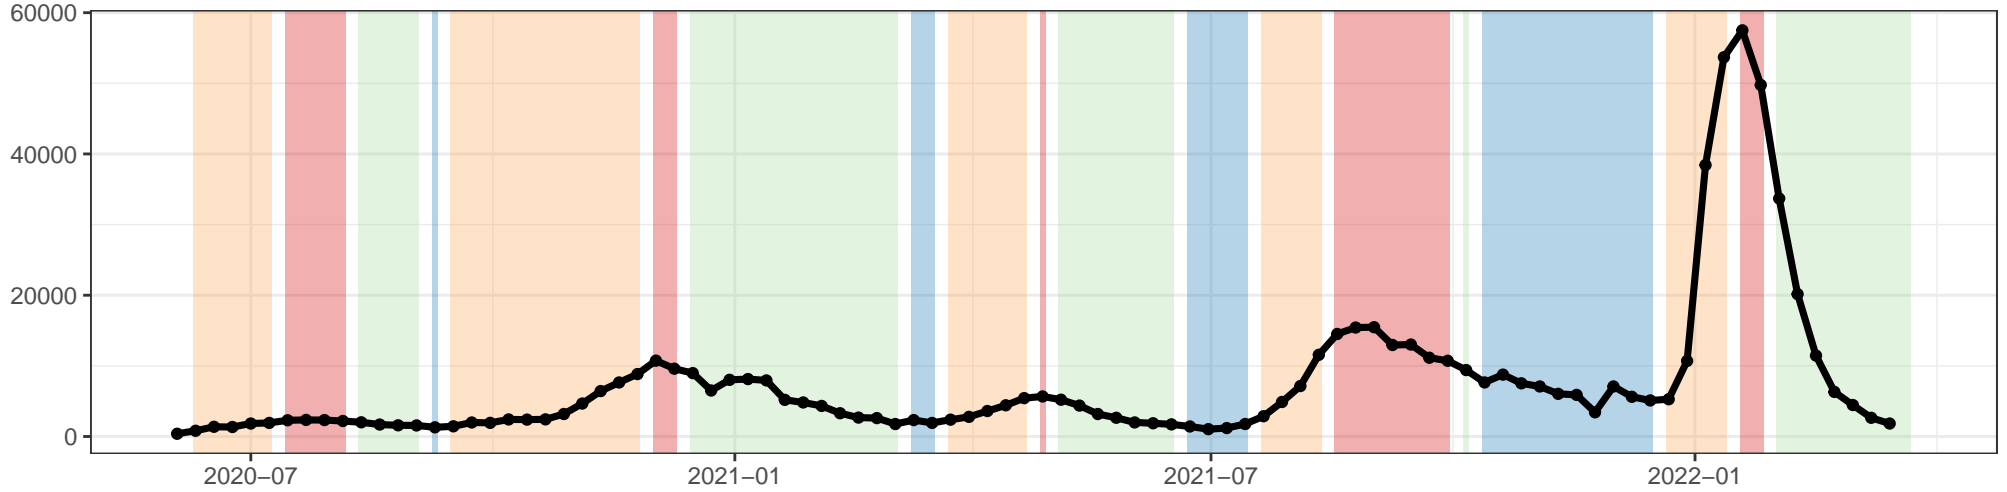

phase    increasing    decreasing    peak    nadir

\*Increasing/decreasing = Rt had a 90% probability  $\geq$  or  $\leq$  than 1.0.  
Wks b/w two increasing/decreasing phases  $\rightarrow$  classified as increasing/decreasing.  
Wks b/w increasing and decreasing phases = peaks; nadirs = wks b/w decreasing and increasing phases.

# Pennsylvania

## Rt with 90% CI, w/ phase categories

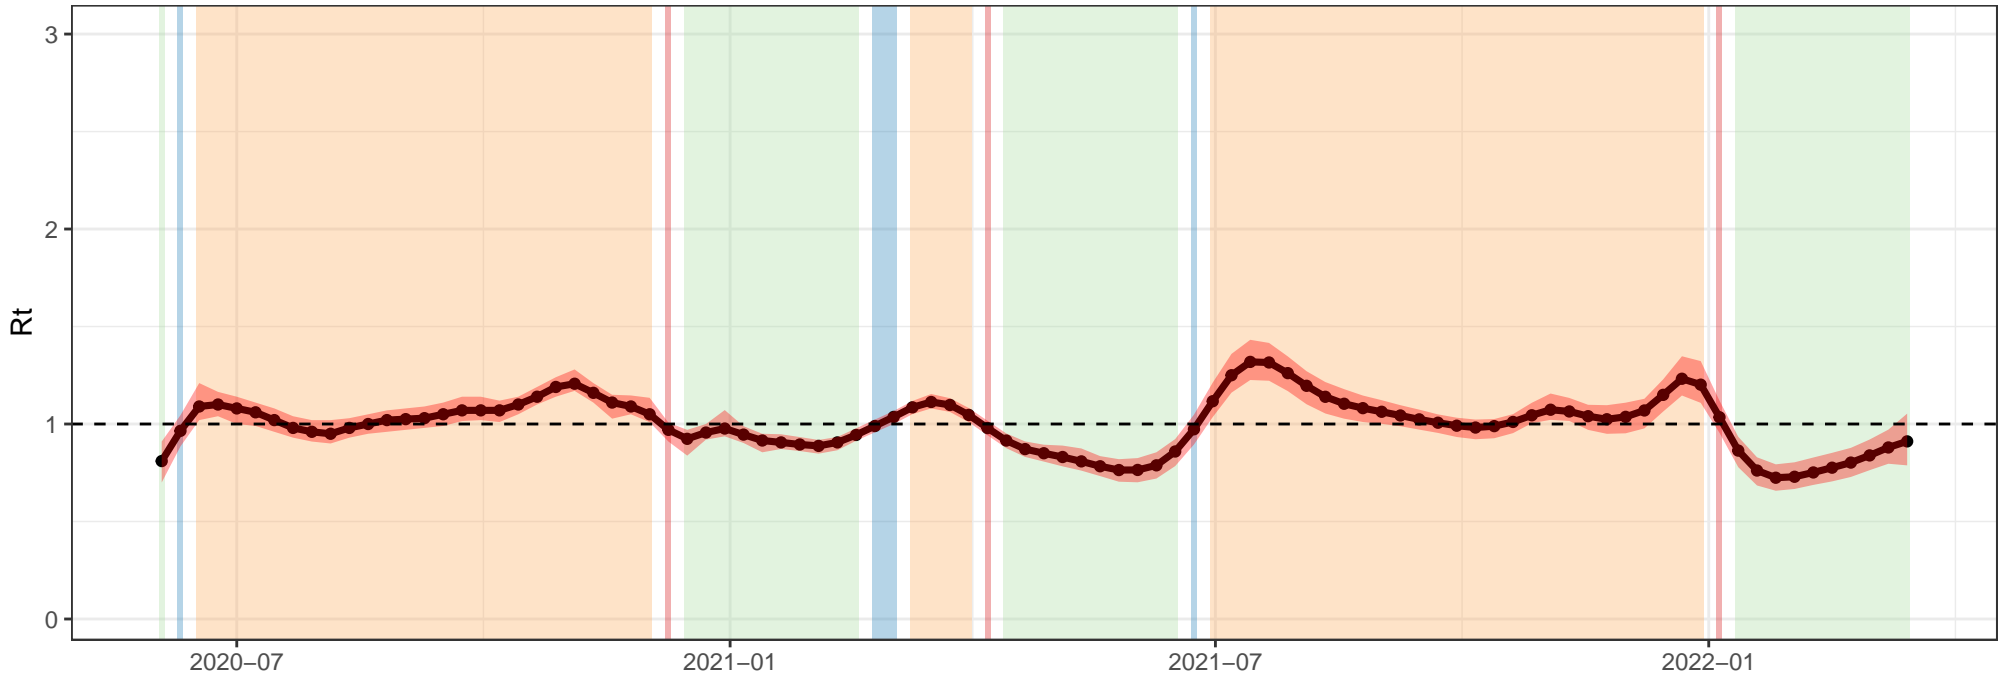

## Case counts w/ lagged phase categories\*

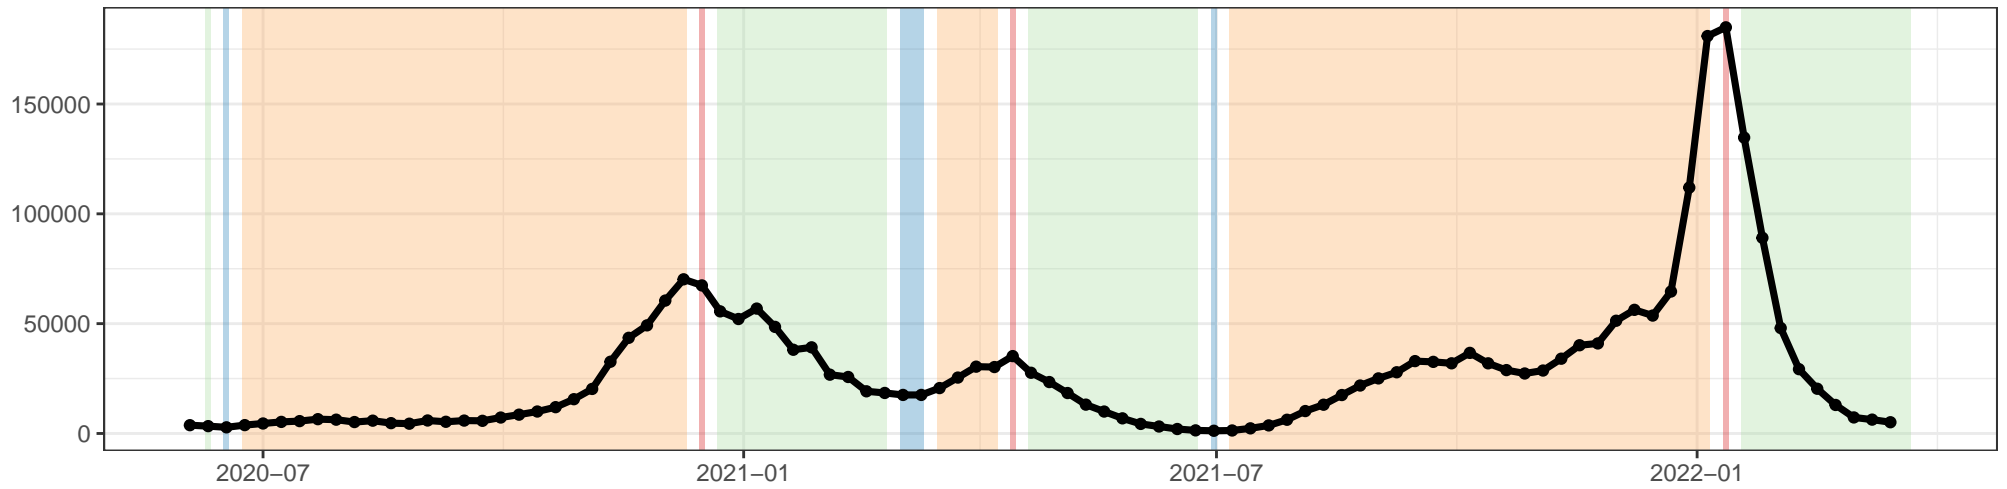

phase    increasing    decreasing    peak    nadir

\*Increasing/decreasing = Rt had a 90% probability  $\geq$  or  $\leq$  than 1.0.  
Wks b/w two increasing/decreasing phases  $\rightarrow$  classified as increasing/decreasing.  
Wks b/w increasing and decreasing phases = peaks; nadirs = wks b/w decreasing and increasing phases.

# Rhode Island

## Rt with 90% CI, w/ phase categories

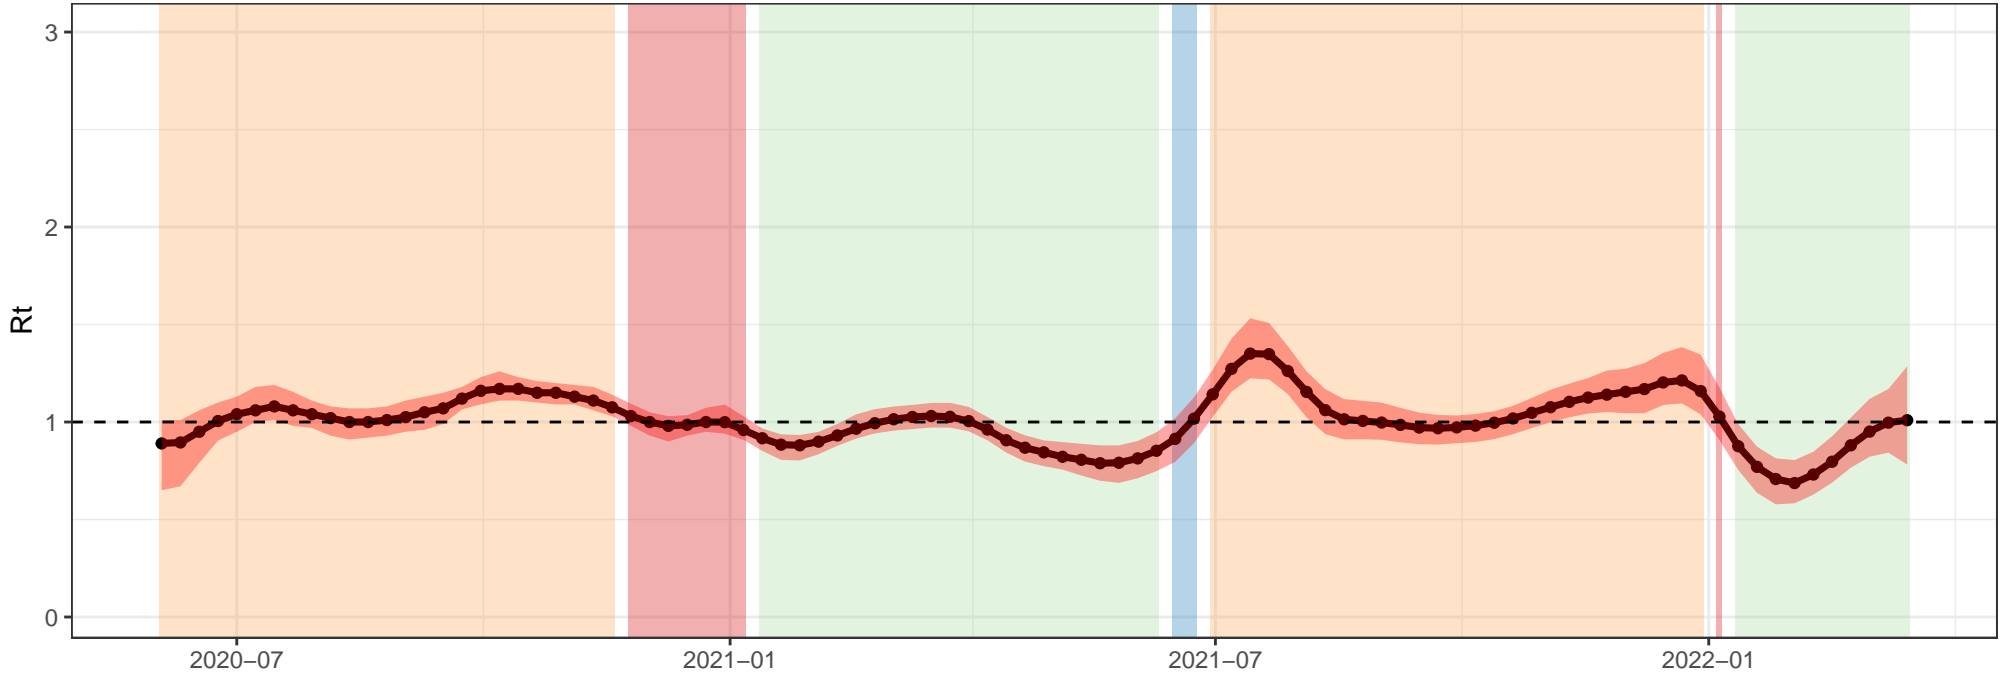

## Case counts w/ lagged phase categories\*

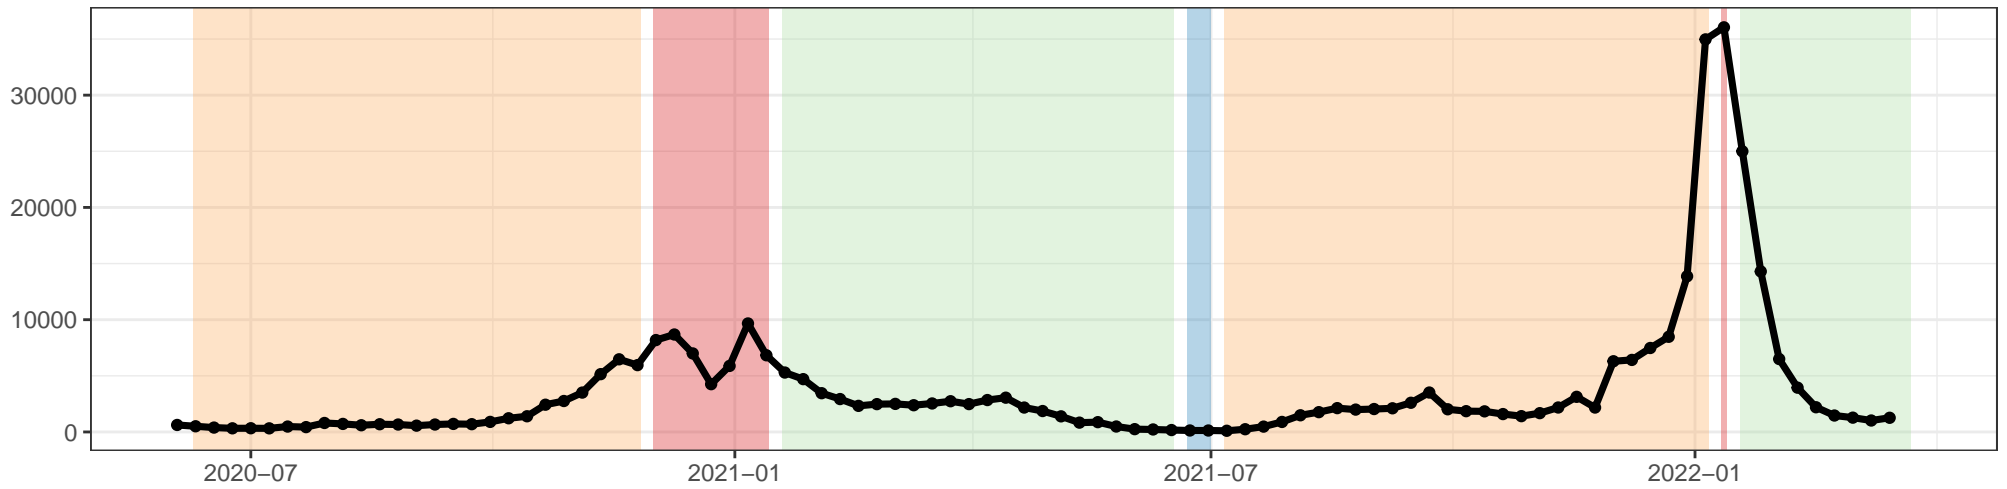

phase    increasing    decreasing    peak    nadir

\*Increasing/decreasing = Rt had a 90% probability  $\geq$  or  $\leq$  than 1.0.  
Wks b/w two increasing/decreasing phases  $\rightarrow$  classified as increasing/decreasing.  
Wks b/w increasing and decreasing phases = peaks; nadirs = wks b/w decreasing and increasing phases.

# South Carolina

## Rt with 90% CI, w/ phase categories

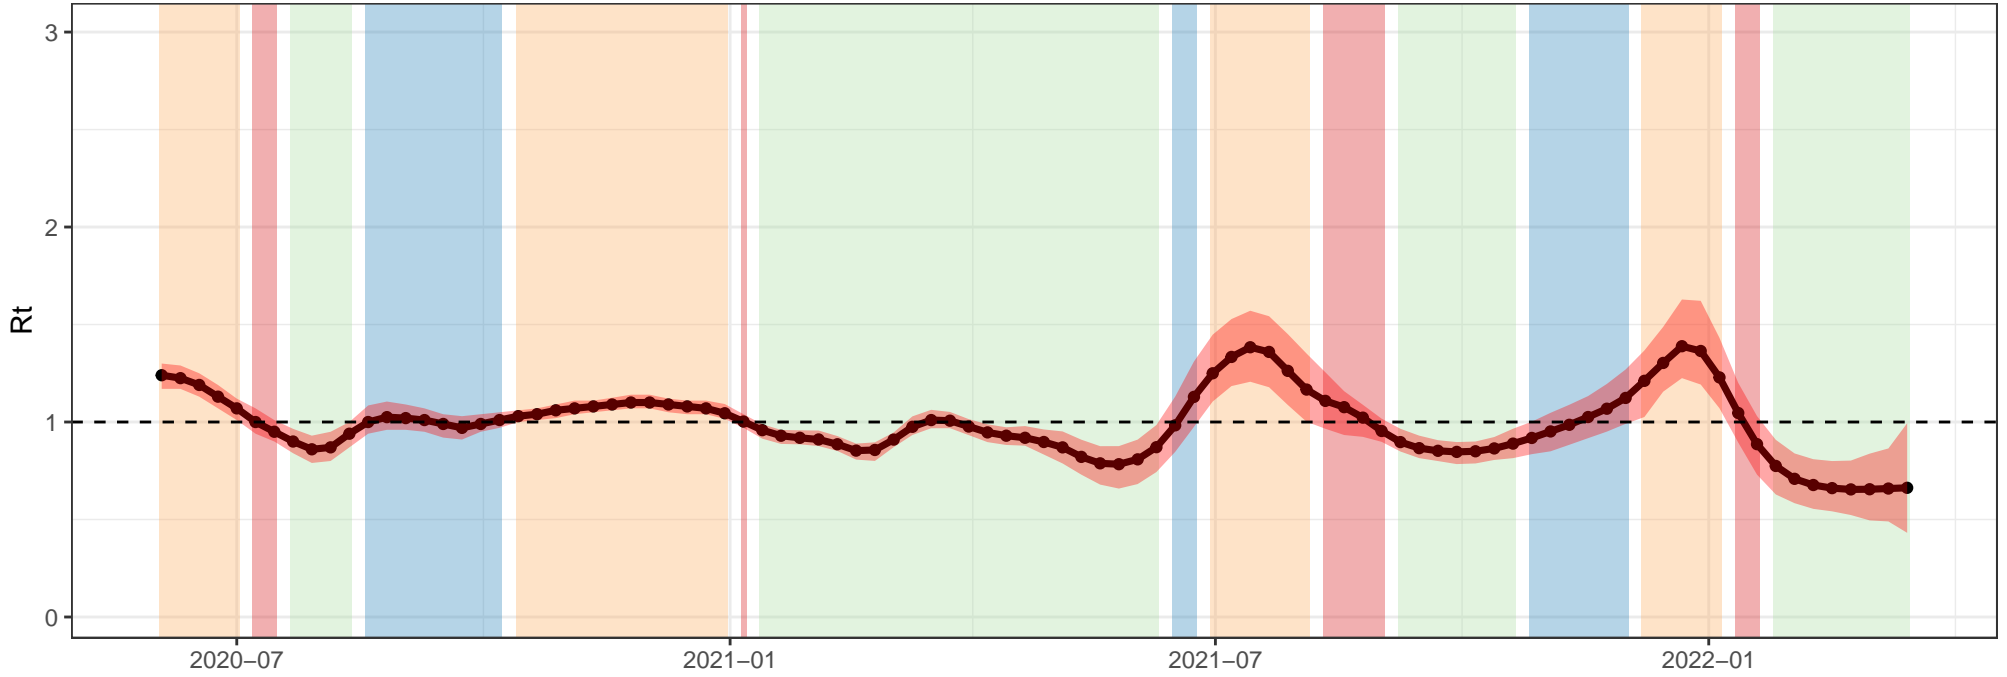

## Case counts w/ lagged phase categories\*

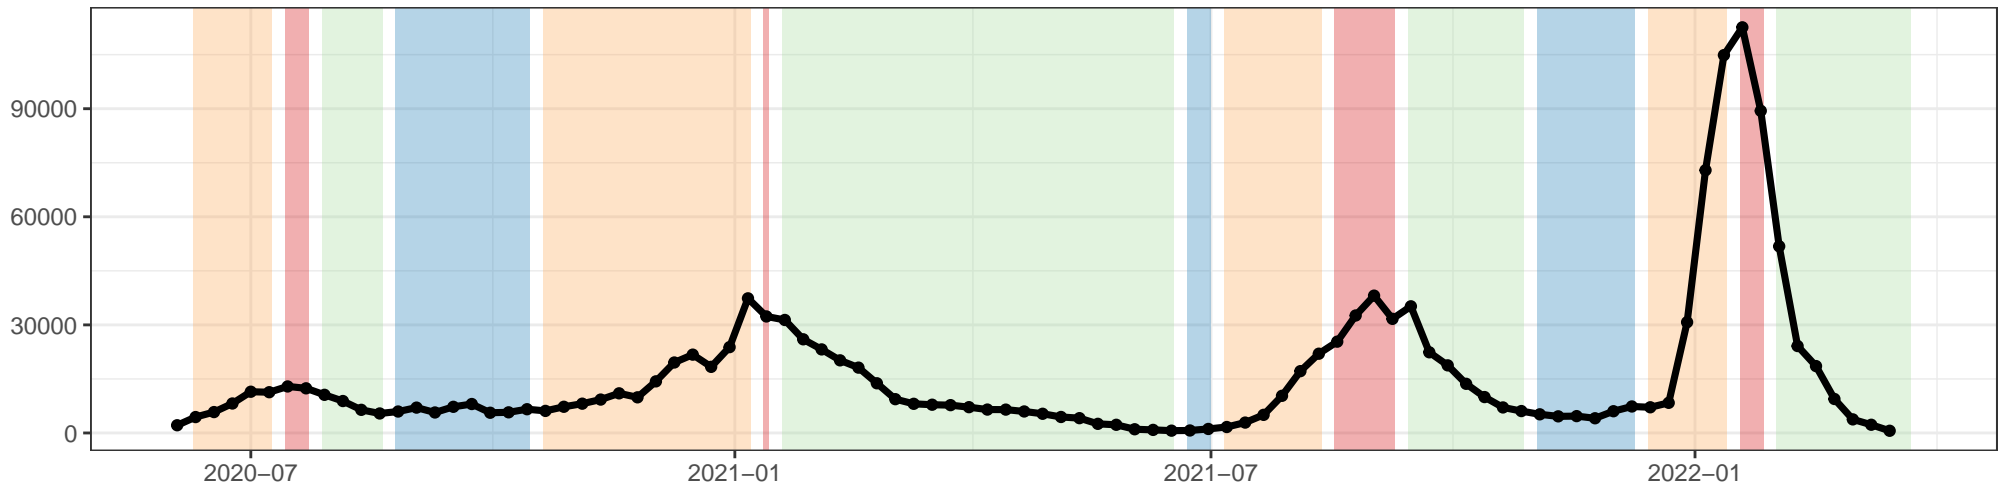

phase    increasing    decreasing    peak    nadir

\*Increasing/decreasing = Rt had a 90% probability  $\geq$  or  $\leq$  than 1.0.  
Wks b/w two increasing/decreasing phases  $\rightarrow$  classified as increasing/decreasing.  
Wks b/w increasing and decreasing phases = peaks; nadirs = wks b/w decreasing and increasing phases.



# South Dakota

## Rt with 90% CI, w/ phase categories

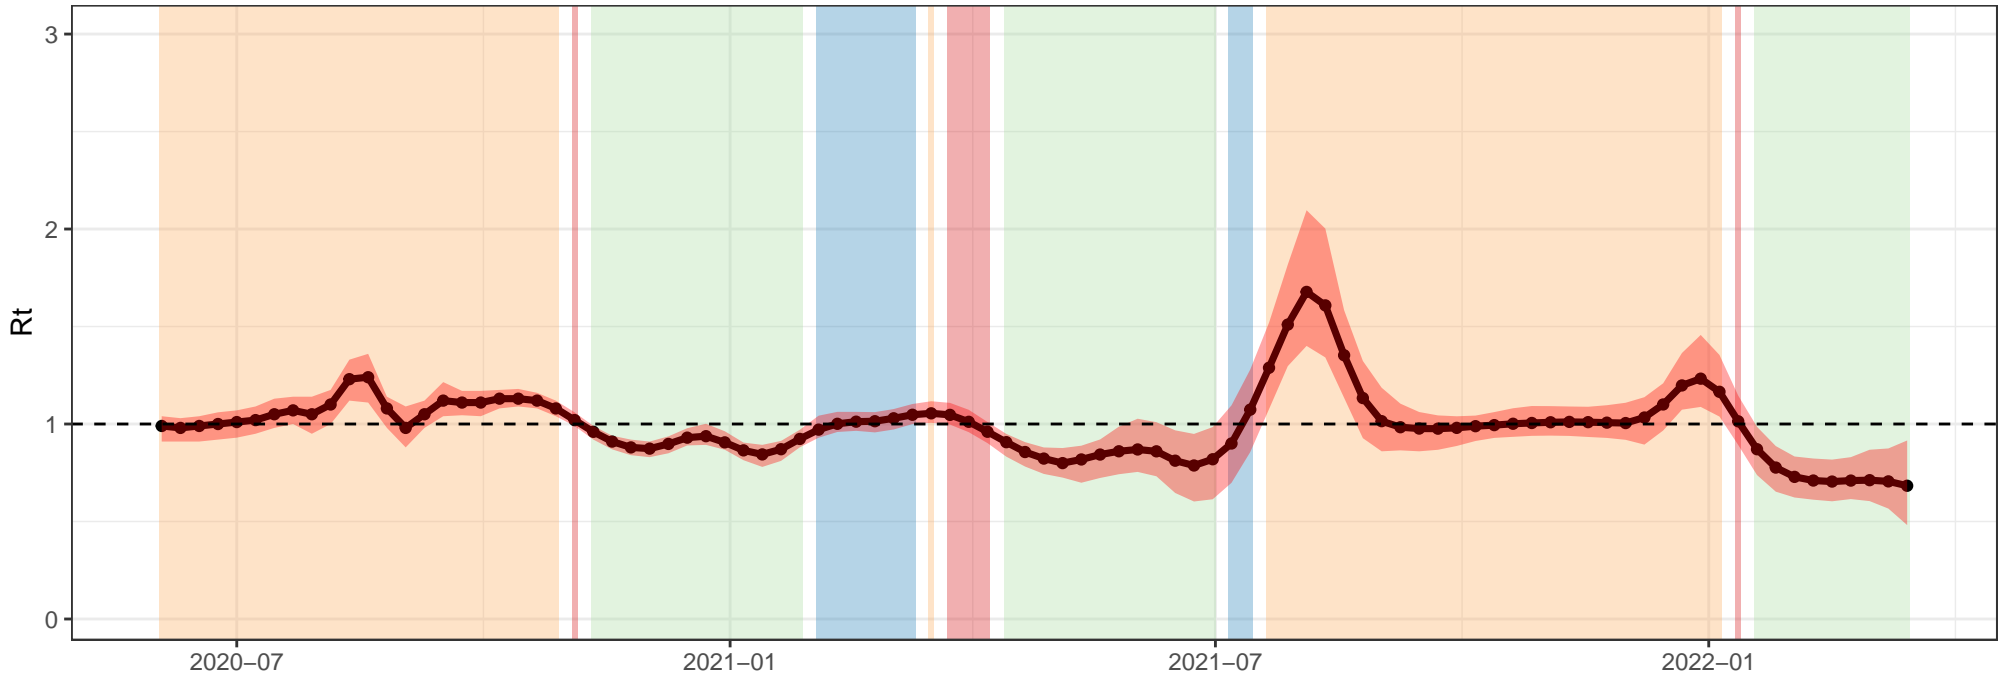

## Case counts w/ lagged phase categories\*

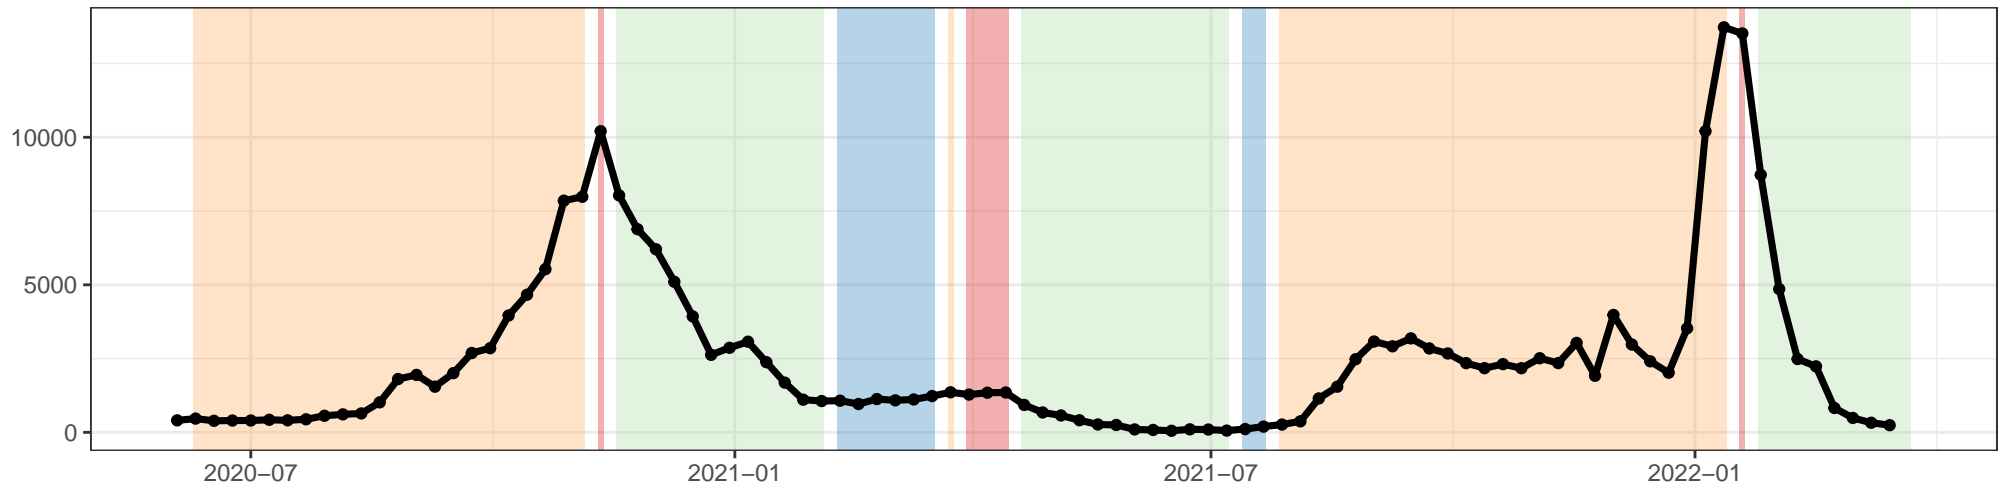

phase    increasing    decreasing    peak    nadir

\*Increasing/decreasing = Rt had a 90% probability  $\geq$  or  $\leq$  than 1.0.  
Wks b/w two increasing/decreasing phases  $\rightarrow$  classified as increasing/decreasing.  
Wks b/w increasing and decreasing phases = peaks; nadirs = wks b/w decreasing and increasing phases.

# Tennessee

## Rt with 90% CI, w/ phase categories

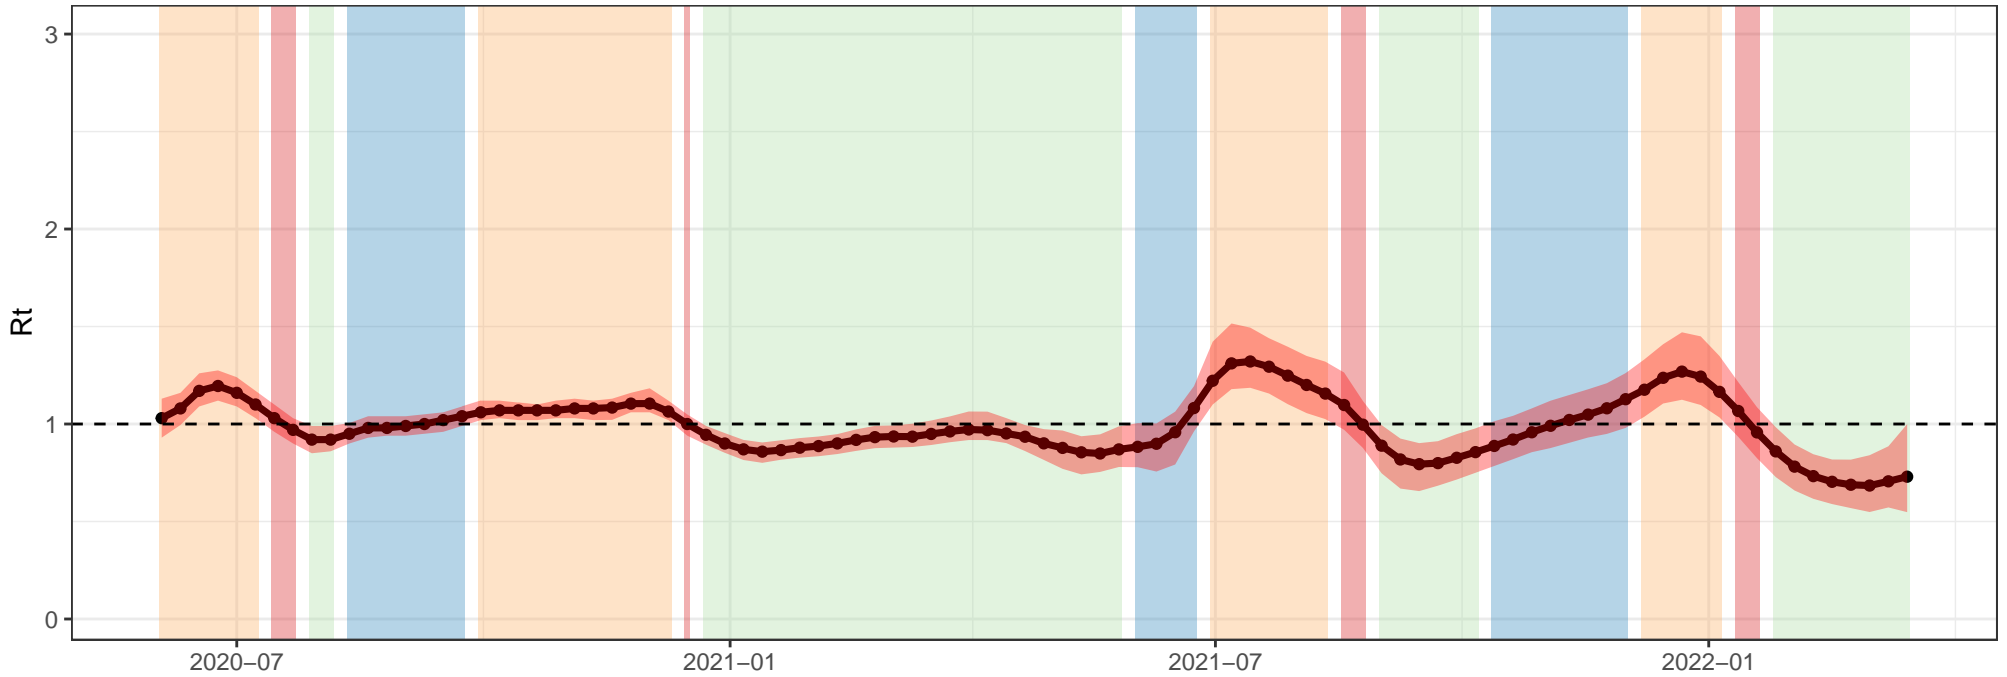

## Case counts w/ lagged phase categories\*

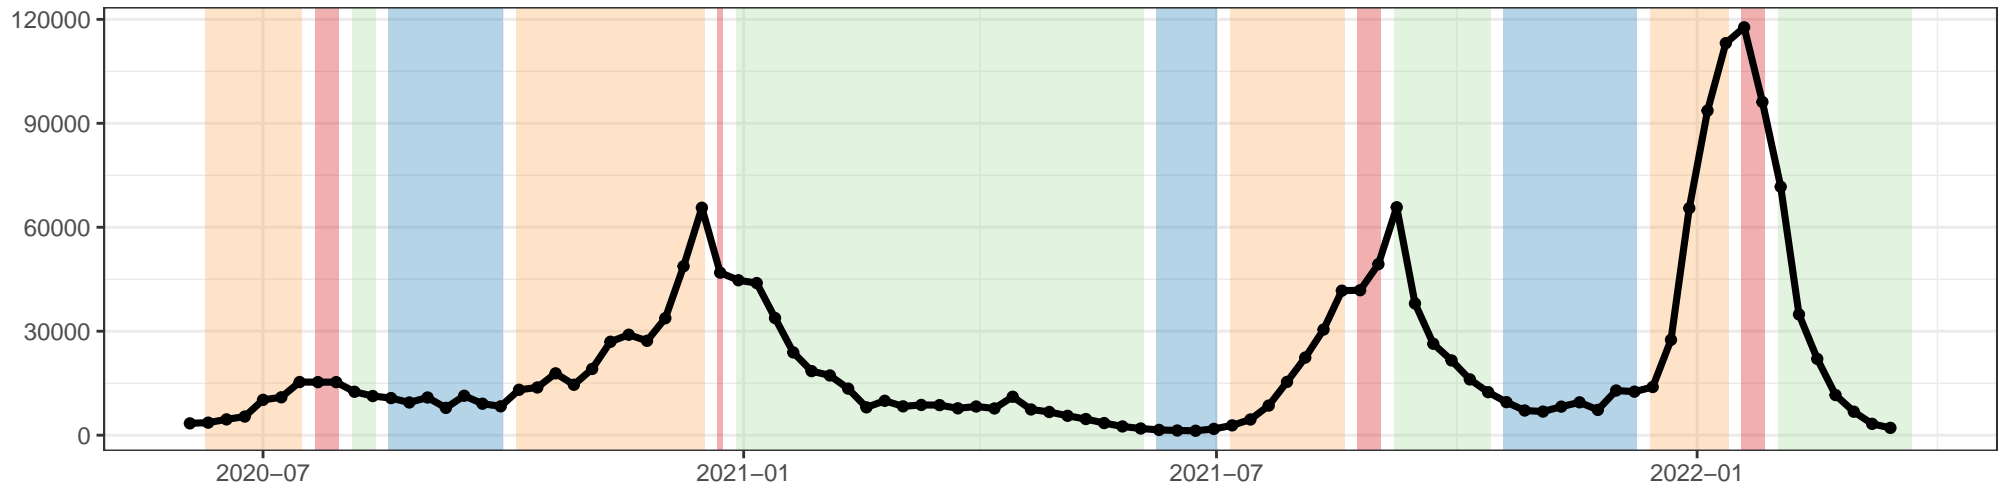

phase    increasing    decreasing    peak    nadir

\*Increasing/decreasing = Rt had a 90% probability  $\geq$  or  $\leq$  than 1.0.  
Wks b/w two increasing/decreasing phases  $\rightarrow$  classified as increasing/decreasing.  
Wks b/w increasing and decreasing phases = peaks; nadirs = wks b/w decreasing and increasing phases.

# Texas

## Rt with 90% CI, w/ phase categories

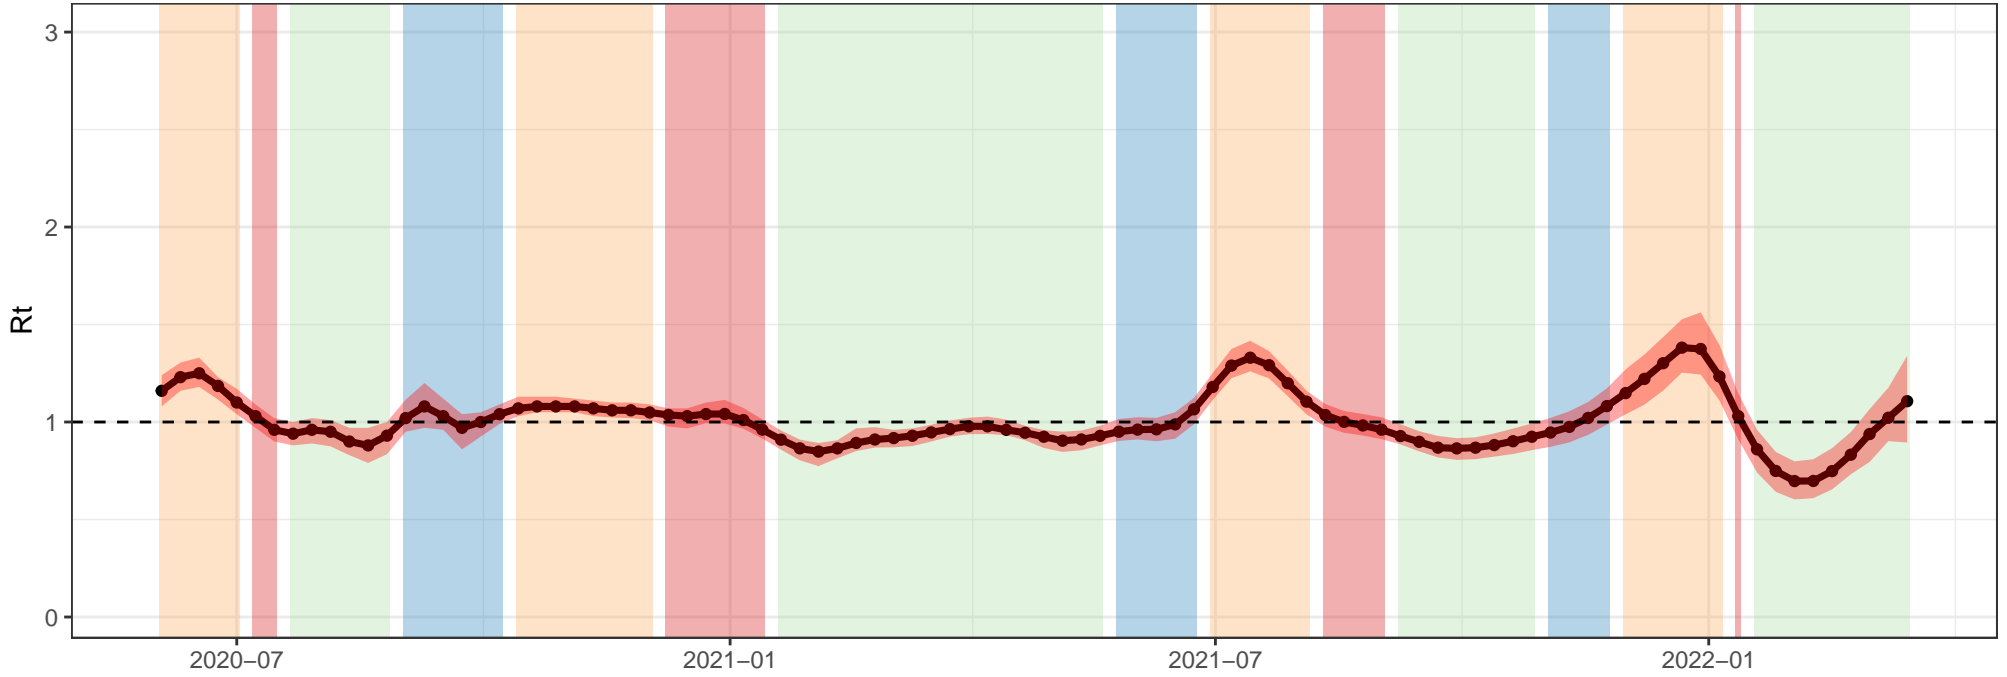

## Case counts w/ lagged phase categories\*

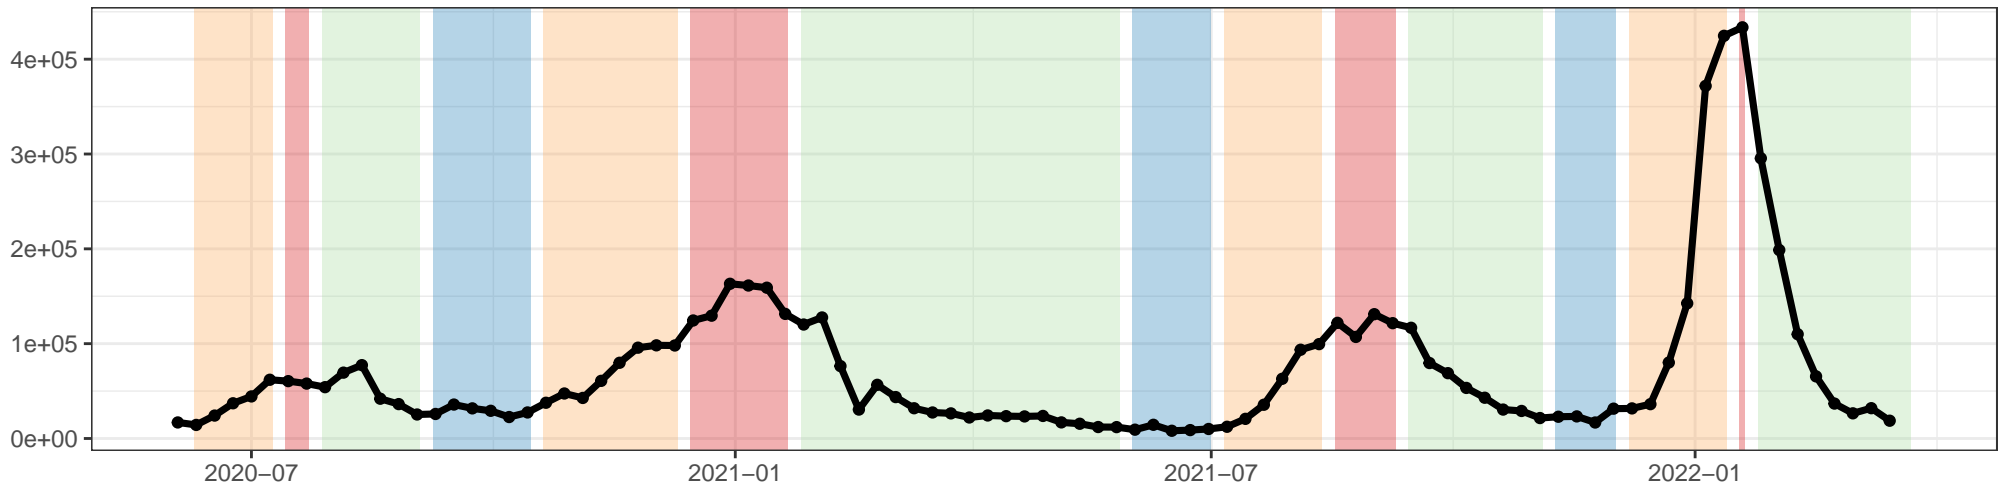

phase    increasing    decreasing    peak    nadir

\*Increasing/decreasing = Rt had a 90% probability  $\geq$  or  $\leq$  than 1.0.  
Wks b/w two increasing/decreasing phases  $\rightarrow$  classified as increasing/decreasing.  
Wks b/w increasing and decreasing phases = peaks; nadirs = wks b/w decreasing and increasing phases.

# Utah

## Rt with 90% CI, w/ phase categories

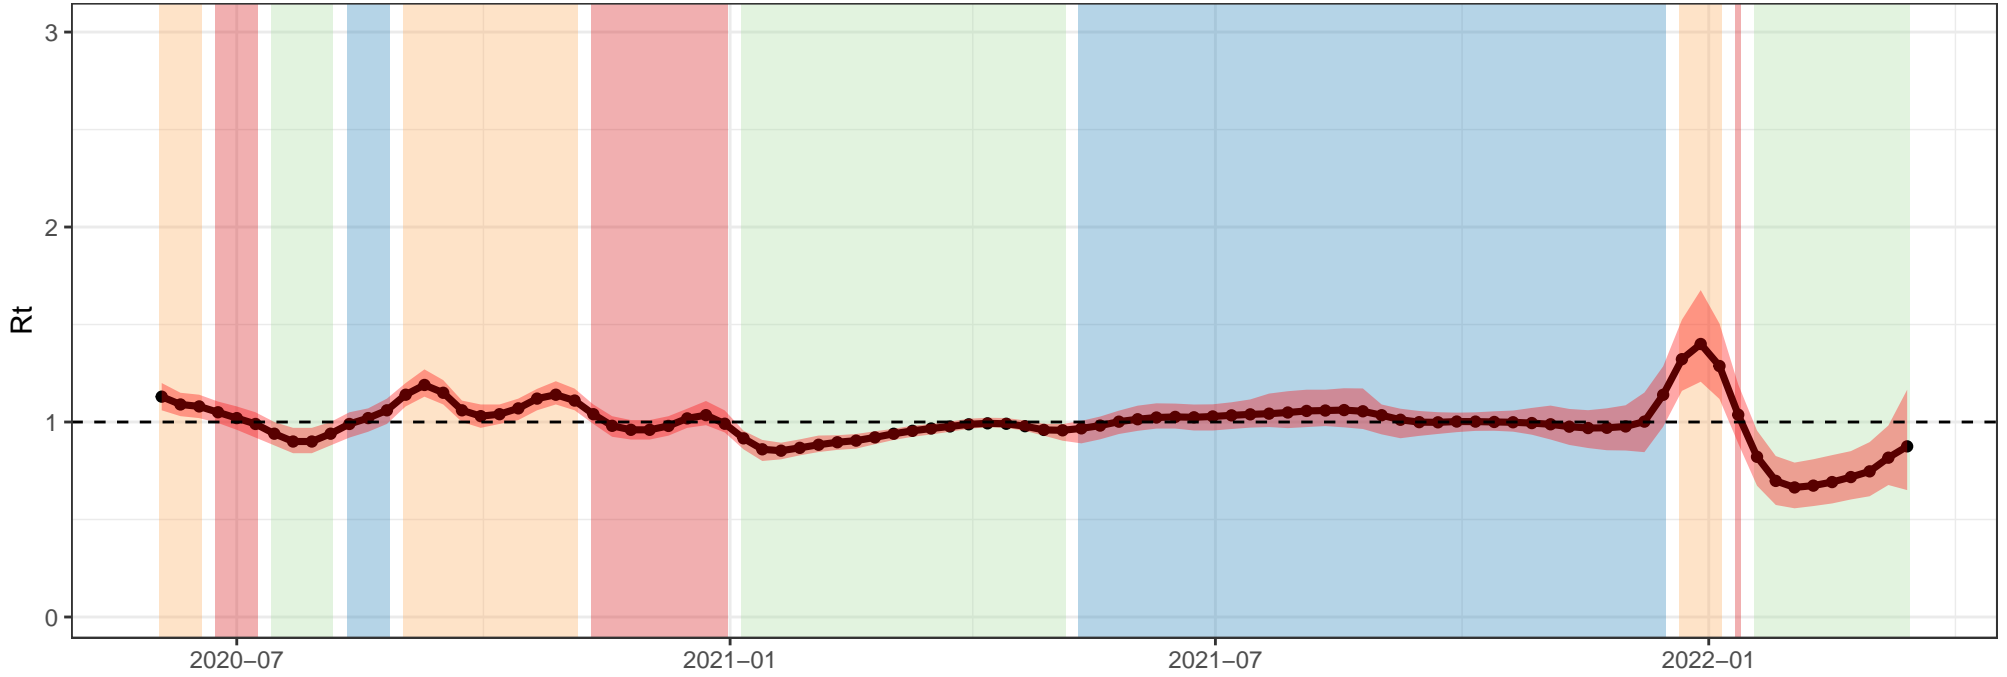

## Case counts w/ lagged phase categories\*

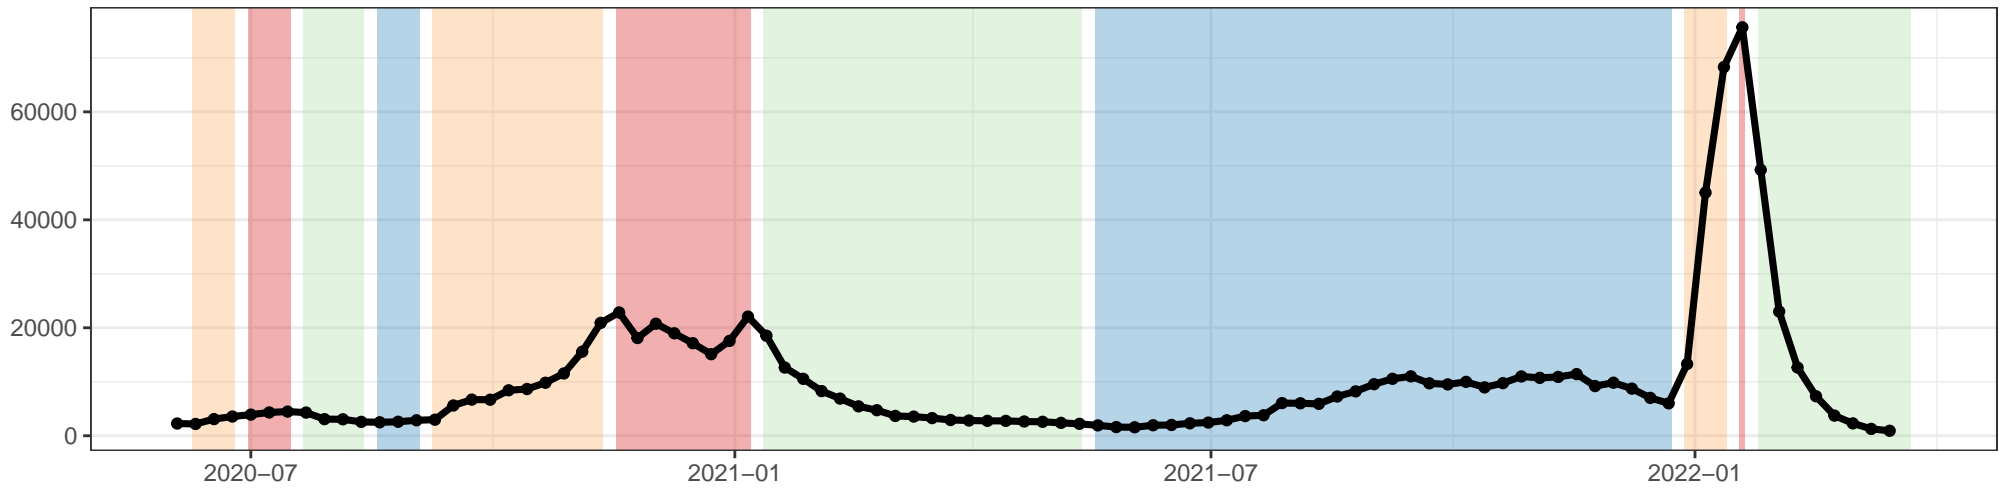

phase    increasing    decreasing    peak    nadir

\*Increasing/decreasing = Rt had a 90% probability  $\geq$  or  $\leq$  than 1.0.  
Wks b/w two increasing/decreasing phases  $\rightarrow$  classified as increasing/decreasing.  
Wks b/w increasing and decreasing phases = peaks; nadirs = wks b/w decreasing and increasing phases.

# Vermont

## Rt with 90% CI, w/ phase categories

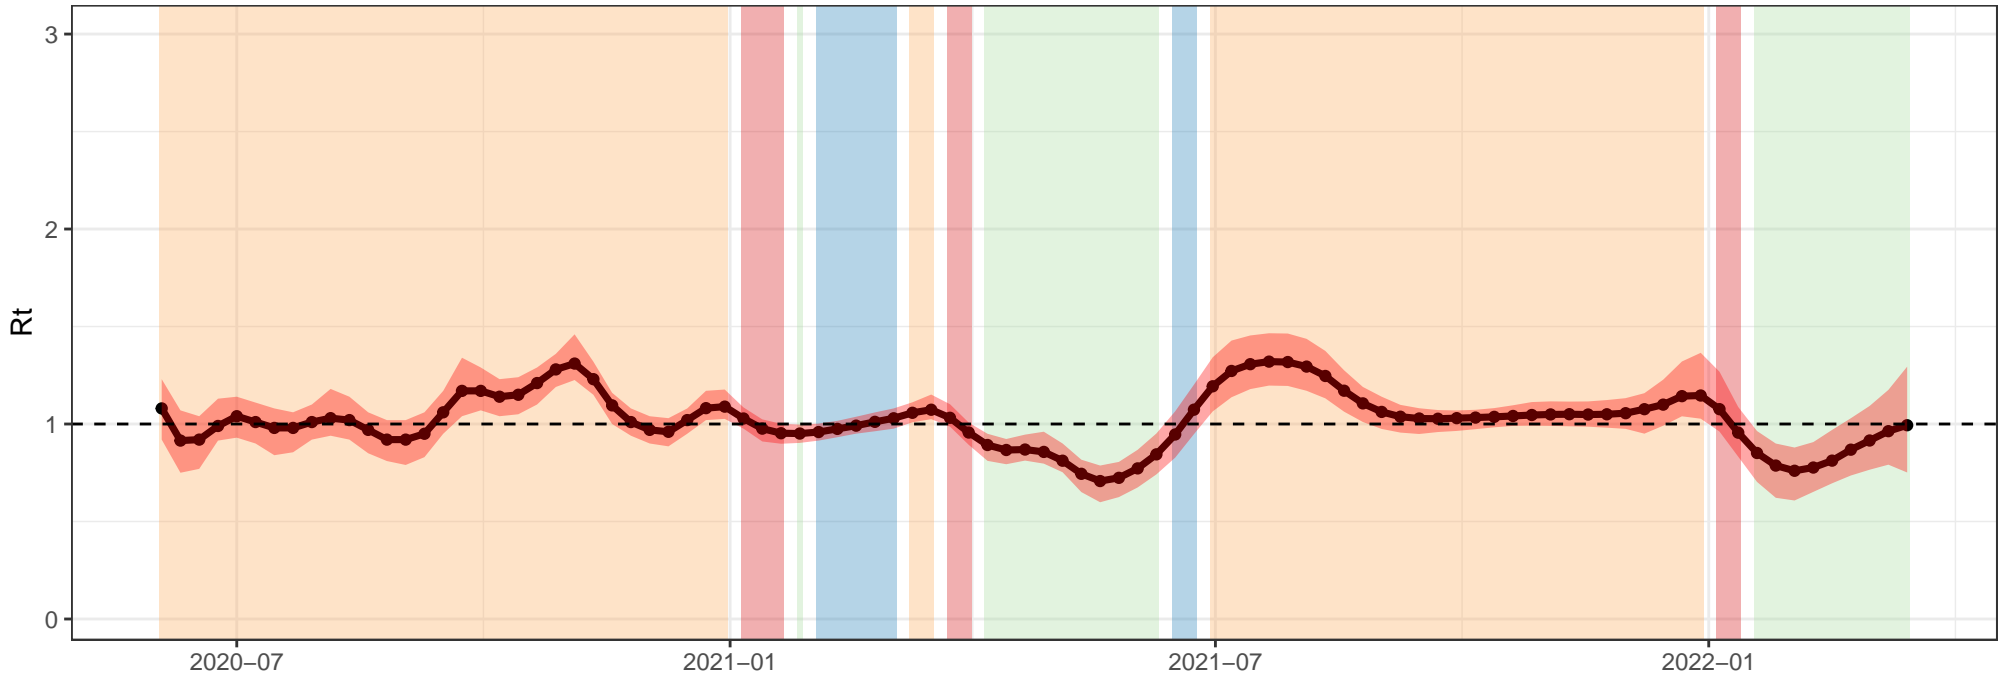

## Case counts w/ lagged phase categories\*

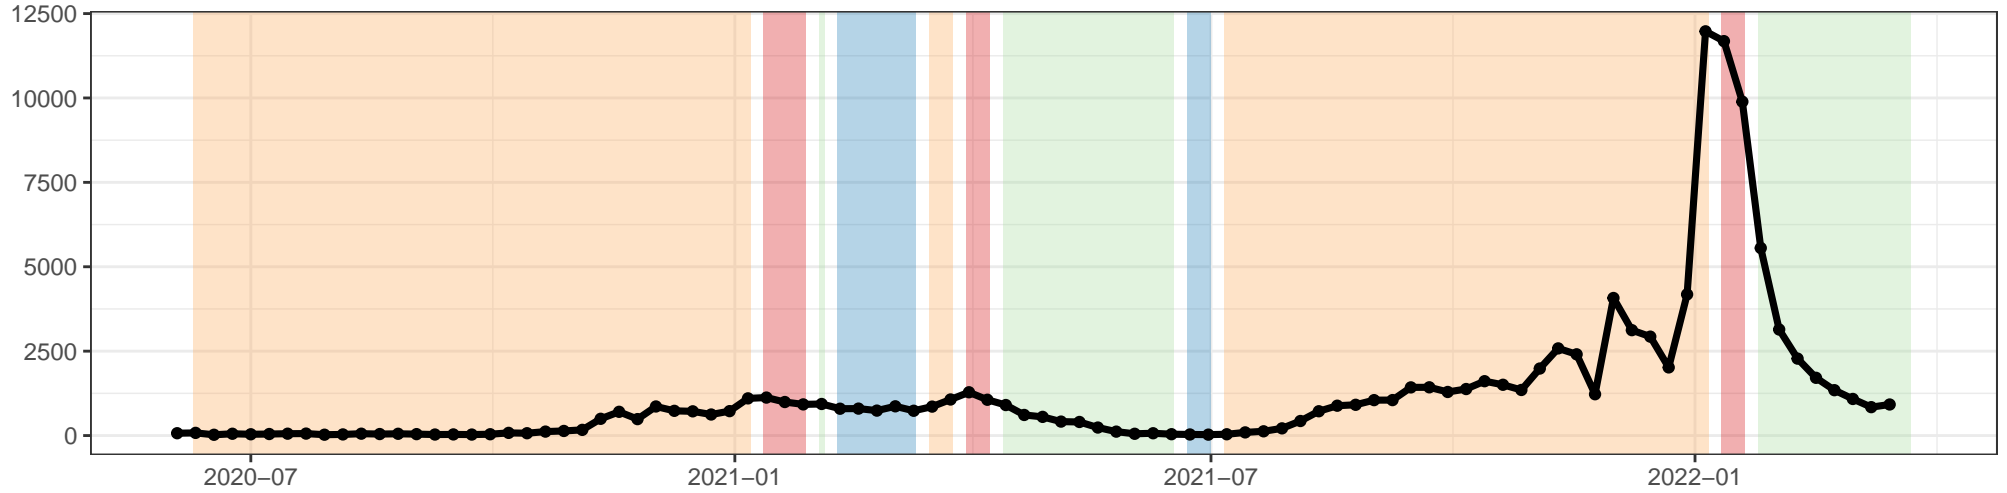

phase    increasing    decreasing    peak    nadir

\*Increasing/decreasing = Rt had a 90% probability  $\geq$  or  $\leq$  than 1.0.  
Wks b/w two increasing/decreasing phases  $\rightarrow$  classified as increasing/decreasing.  
Wks b/w increasing and decreasing phases = peaks; nadirs = wks b/w decreasing and increasing phases.

# Virginia

## Rt with 90% CI, w/ phase categories

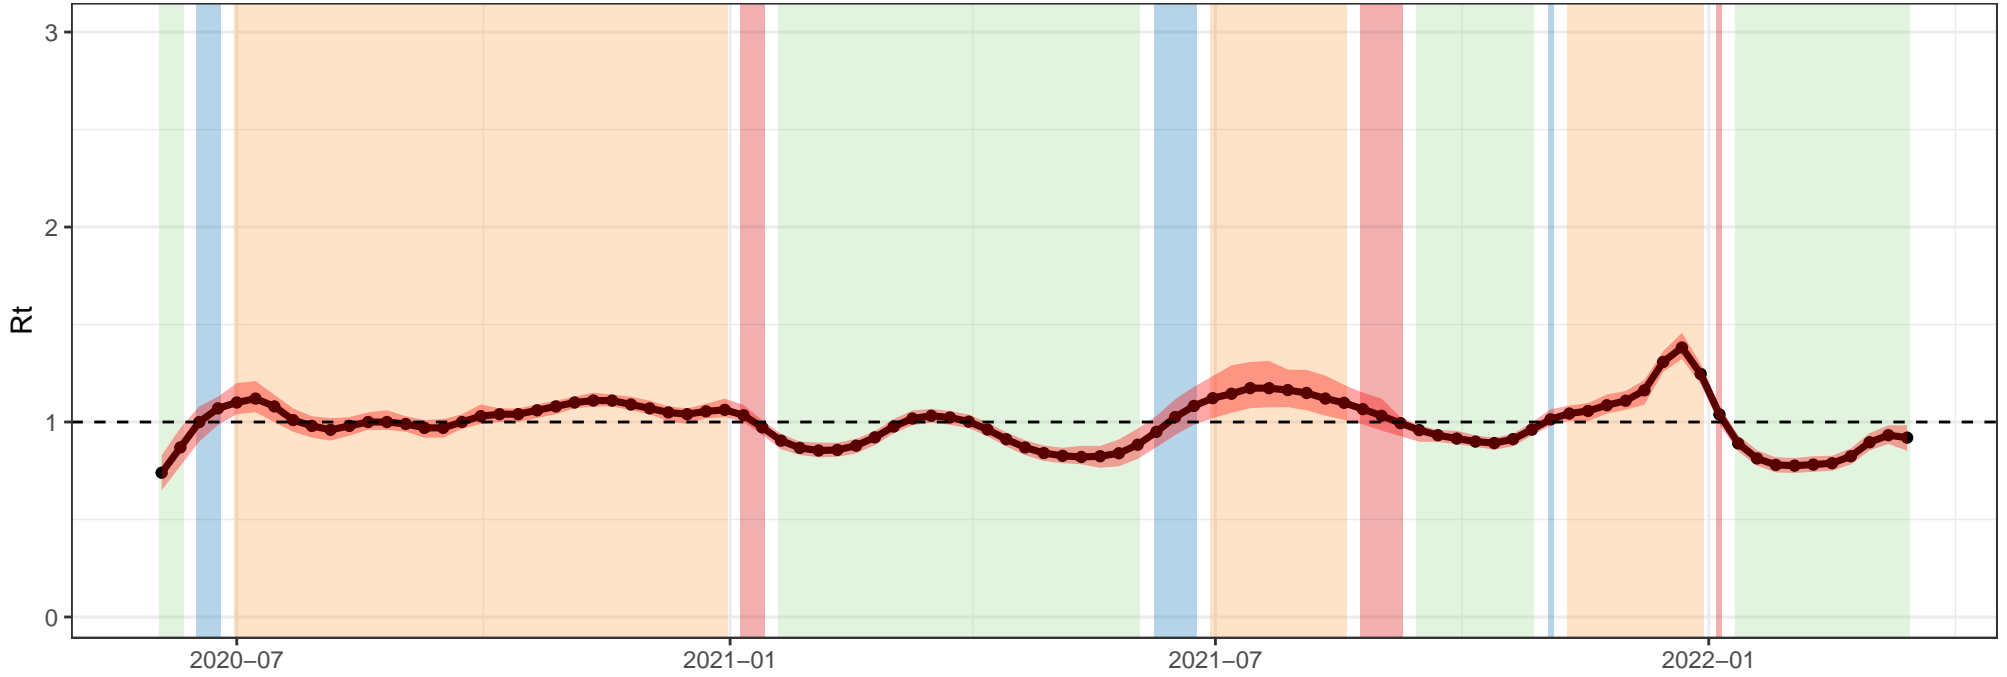

## Case counts w/ lagged phase categories\*

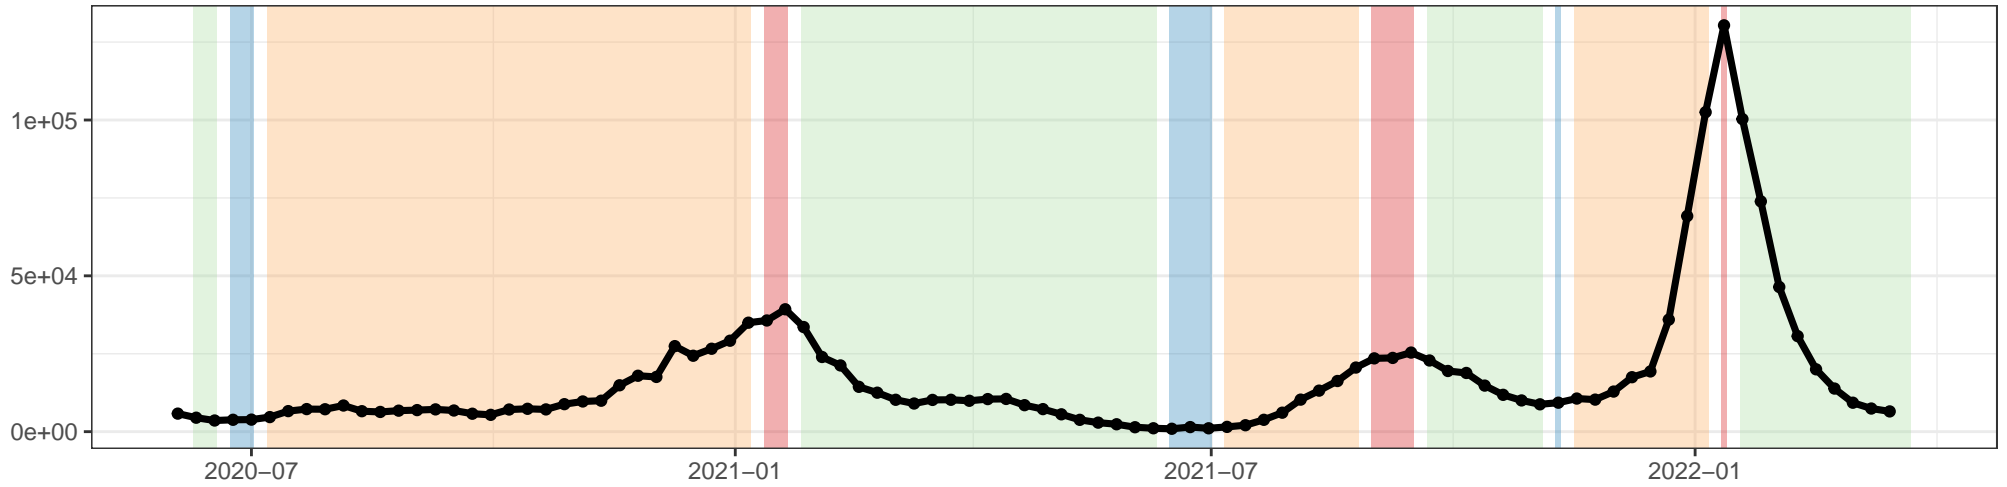

phase    increasing    decreasing    peak    nadir

\*Increasing/decreasing = Rt had a 90% probability  $\geq$  or  $\leq$  than 1.0.  
Wks b/w two increasing/decreasing phases  $\rightarrow$  classified as increasing/decreasing.  
Wks b/w increasing and decreasing phases = peaks; nadirs = wks b/w decreasing and increasing phases.

# Washington

## Rt with 90% CI, w/ phase categories

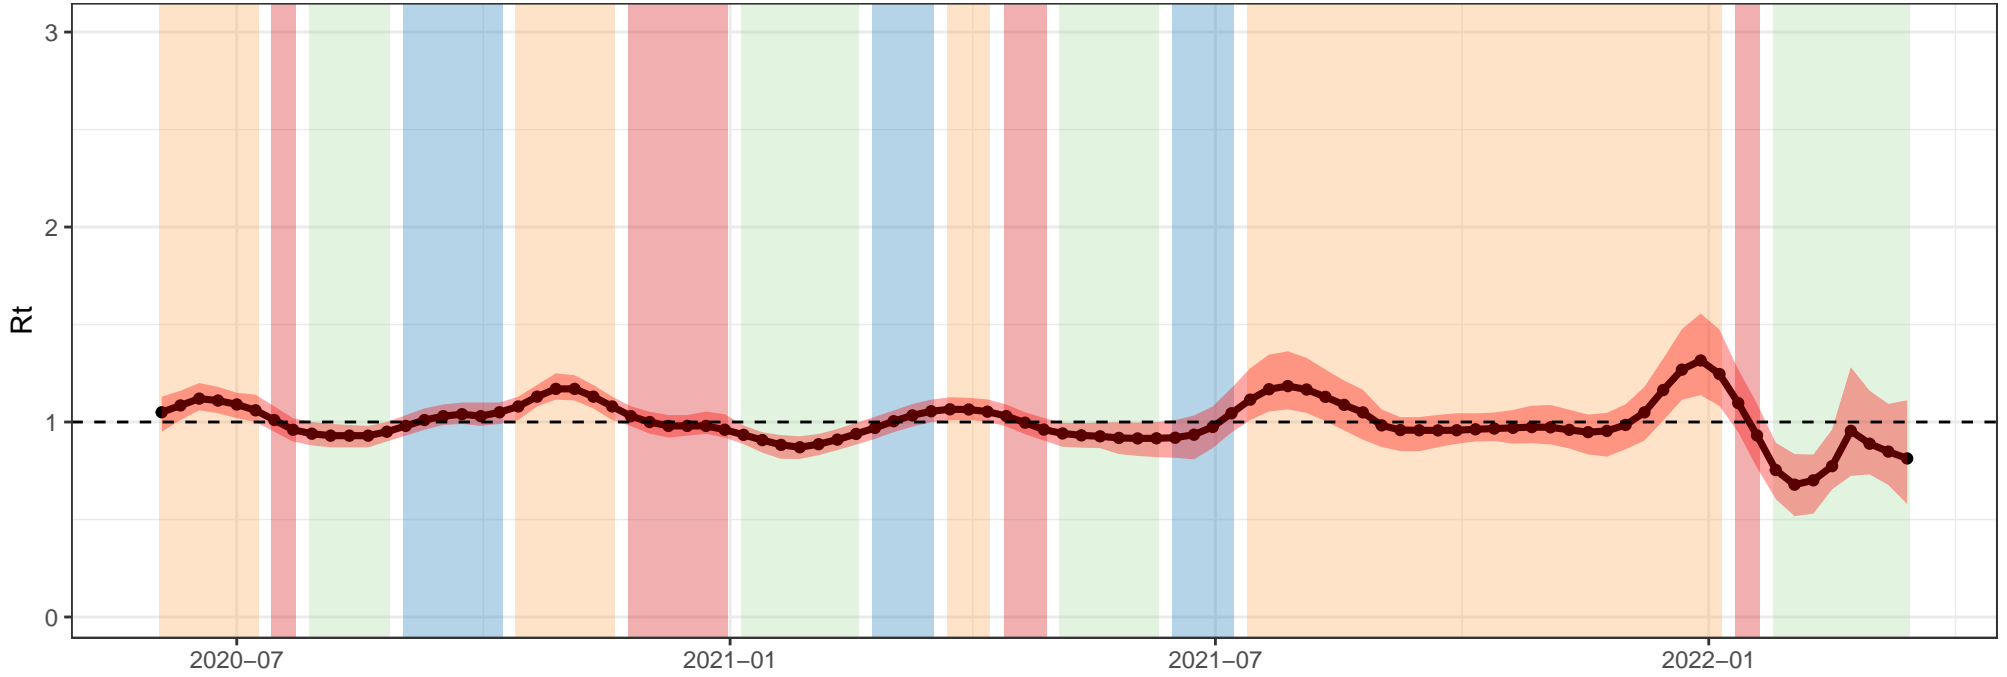

## Case counts w/ lagged phase categories\*

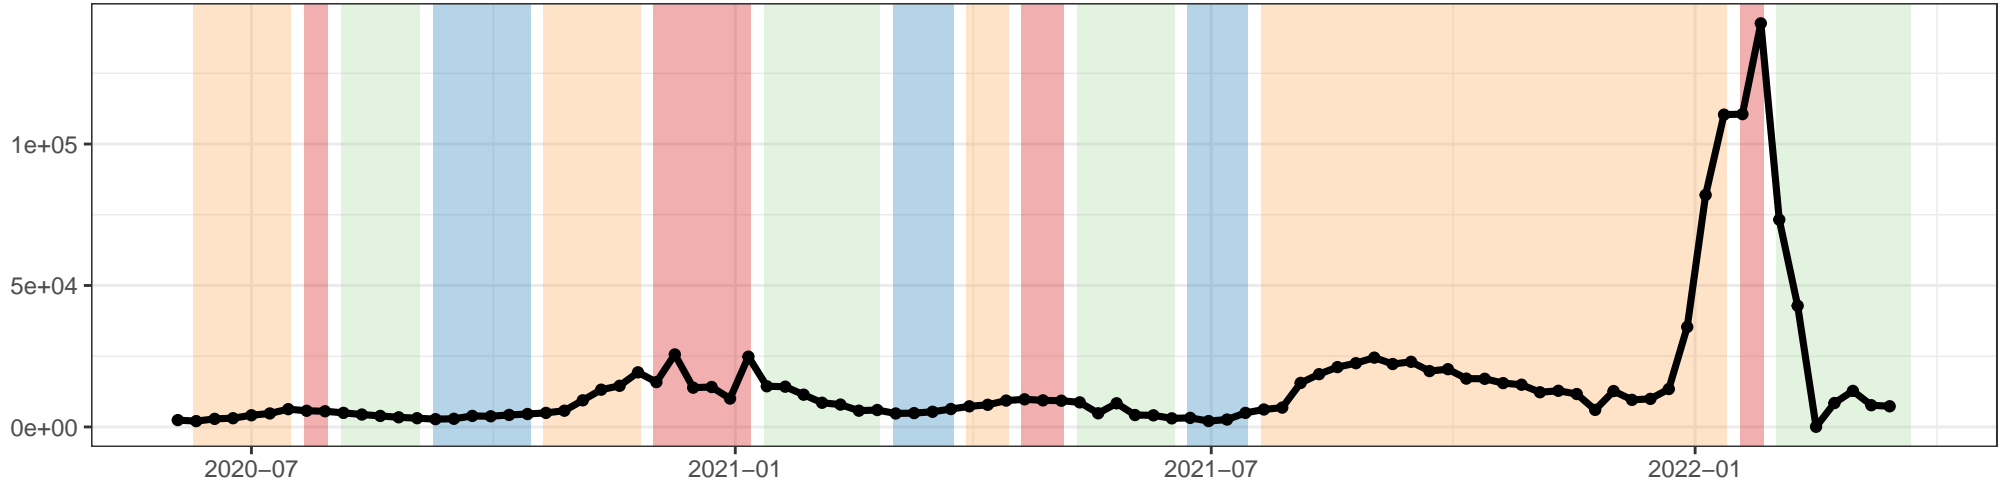

phase    increasing    decreasing    peak    nadir

\*Increasing/decreasing = Rt had a 90% probability  $\geq$  or  $\leq$  than 1.0.  
Wks b/w two increasing/decreasing phases  $\rightarrow$  classified as increasing/decreasing.  
Wks b/w increasing and decreasing phases = peaks; nadirs = wks b/w decreasing and increasing phases.

# West Virginia

## Rt with 90% CI, w/ phase categories

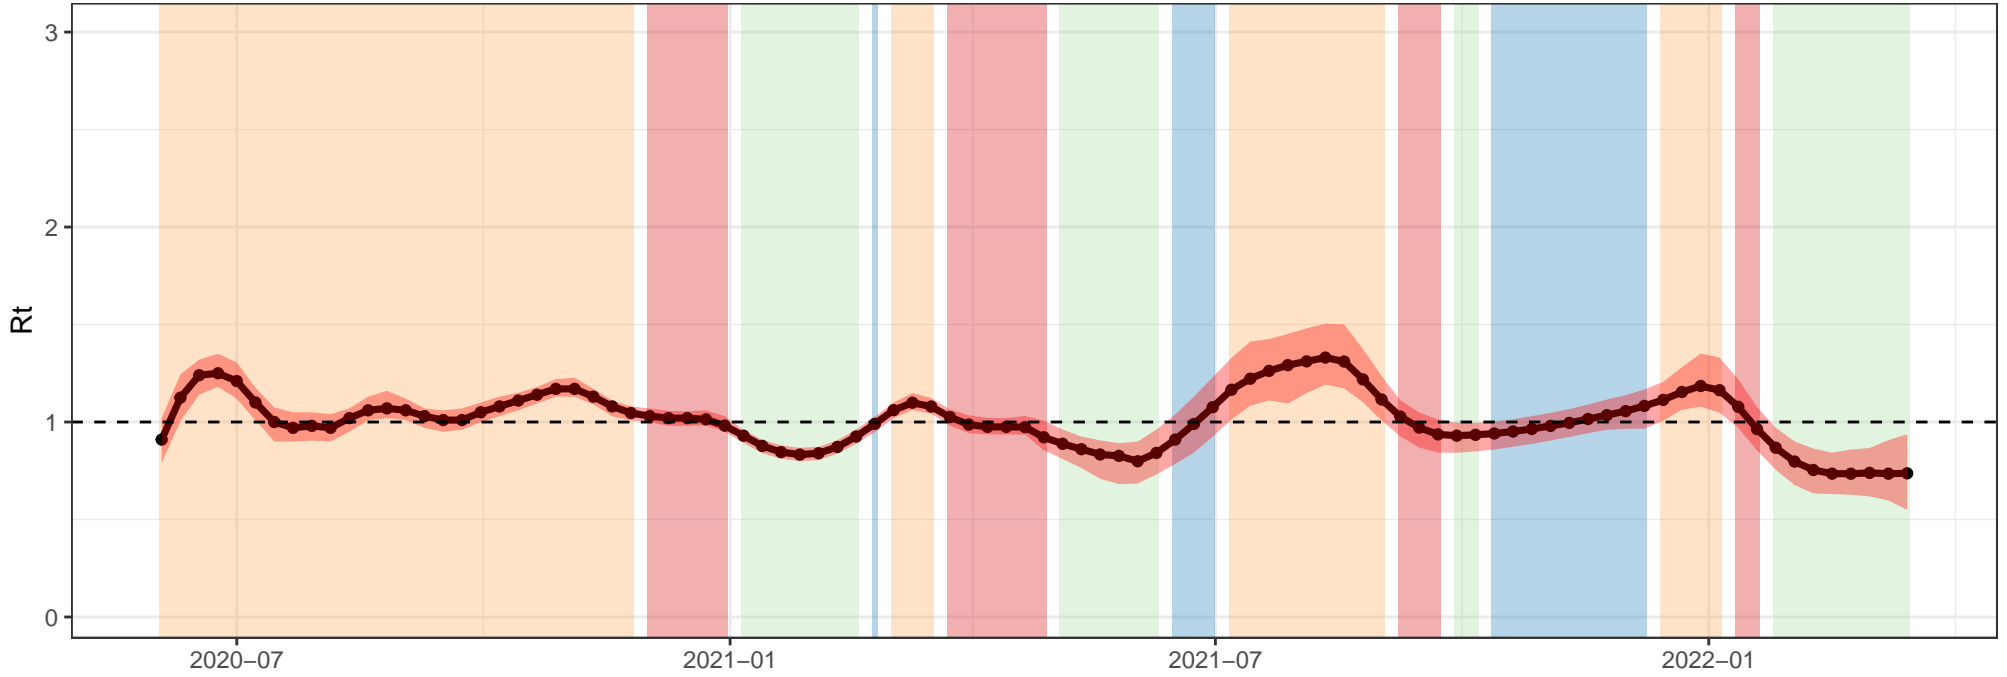

## Case counts w/ lagged phase categories\*

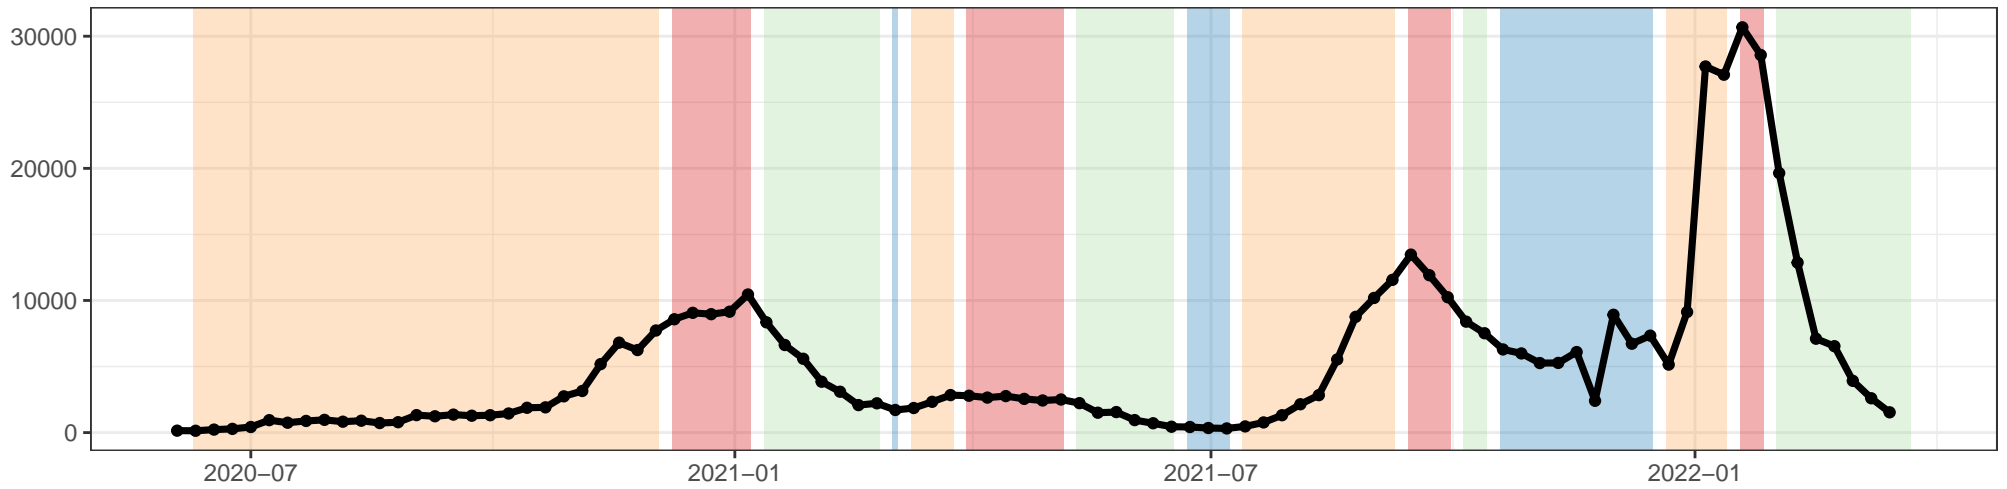

phase    increasing    decreasing    peak    nadir

\*Increasing/decreasing = Rt had a 90% probability  $\geq$  or  $\leq$  than 1.0.  
Wks b/w two increasing/decreasing phases  $\rightarrow$  classified as increasing/decreasing.  
Wks b/w increasing and decreasing phases = peaks; nadirs = wks b/w decreasing and increasing phases.



# Wisconsin

## Rt with 90% CI, w/ phase categories

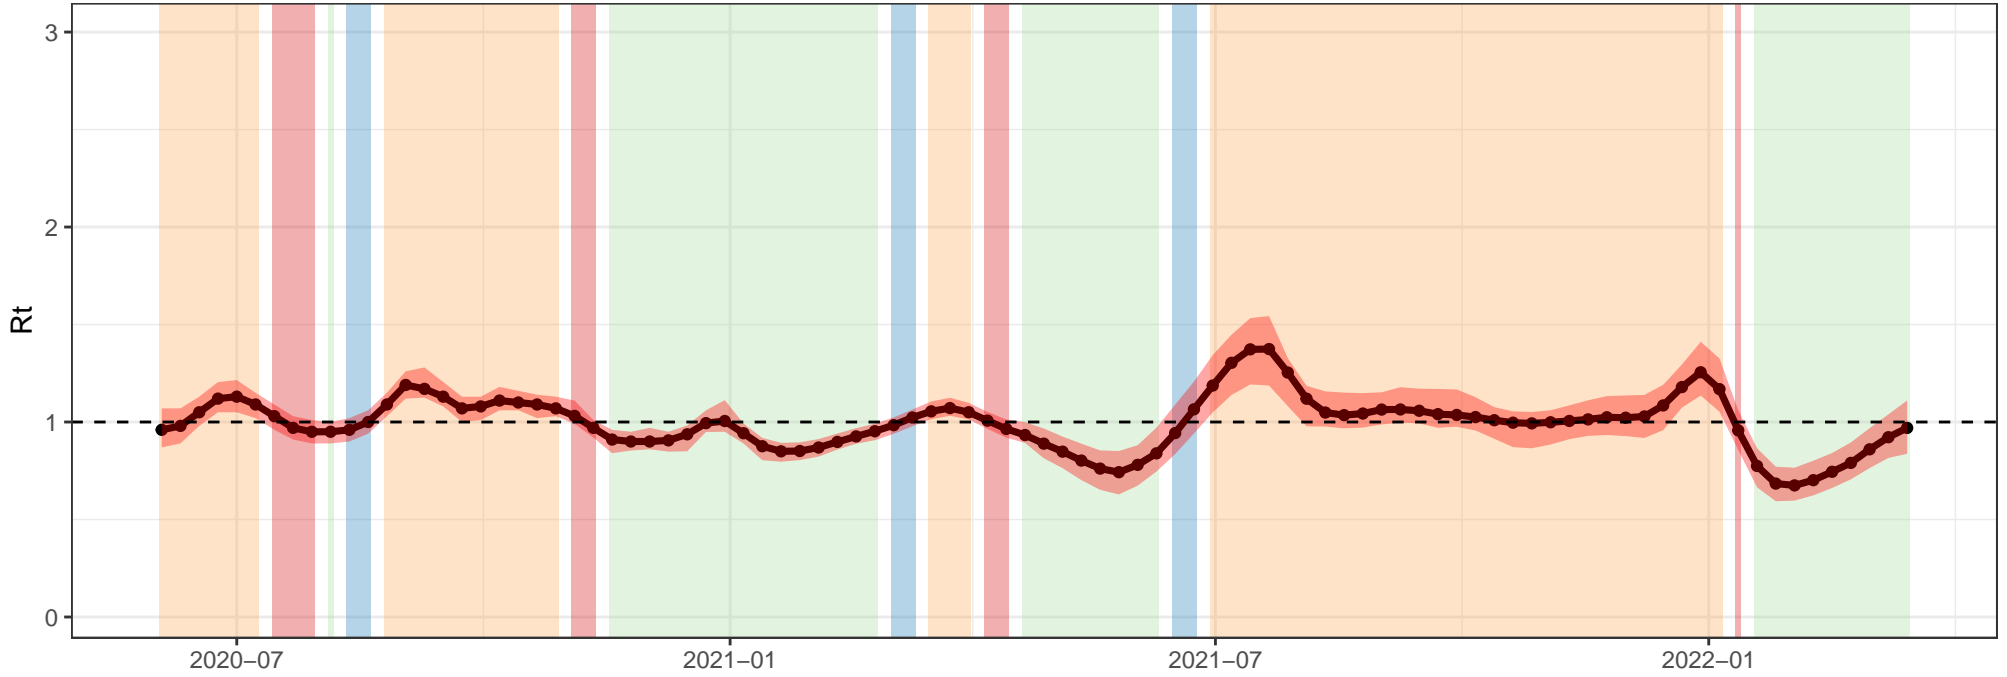

## Case counts w/ lagged phase categories\*

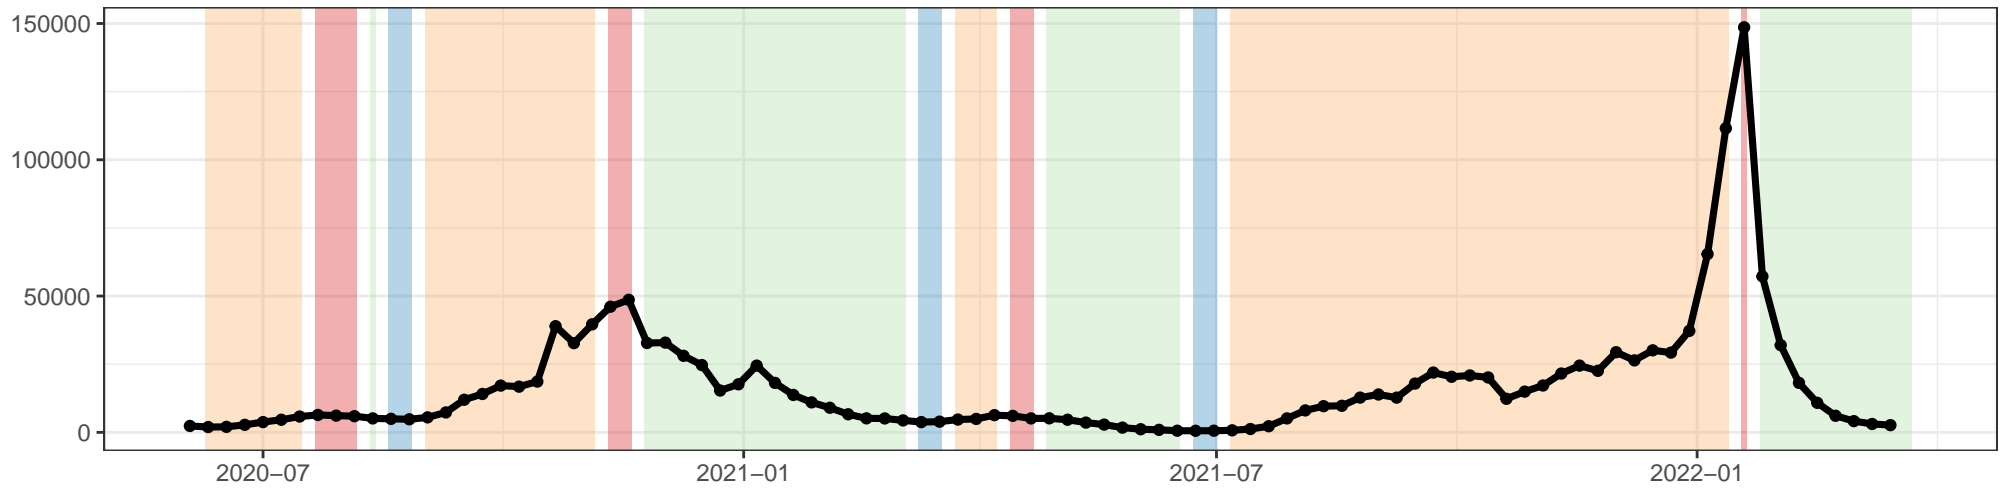

phase    increasing    decreasing    peak    nadir

\*Increasing/decreasing = Rt had a 90% probability  $\geq$  or  $\leq$  than 1.0.  
Wks b/w two increasing/decreasing phases  $\rightarrow$  classified as increasing/decreasing.  
Wks b/w increasing and decreasing phases = peaks; nadirs = wks b/w decreasing and increasing phases.

# Wyoming

## Rt with 90% CI, w/ phase categories

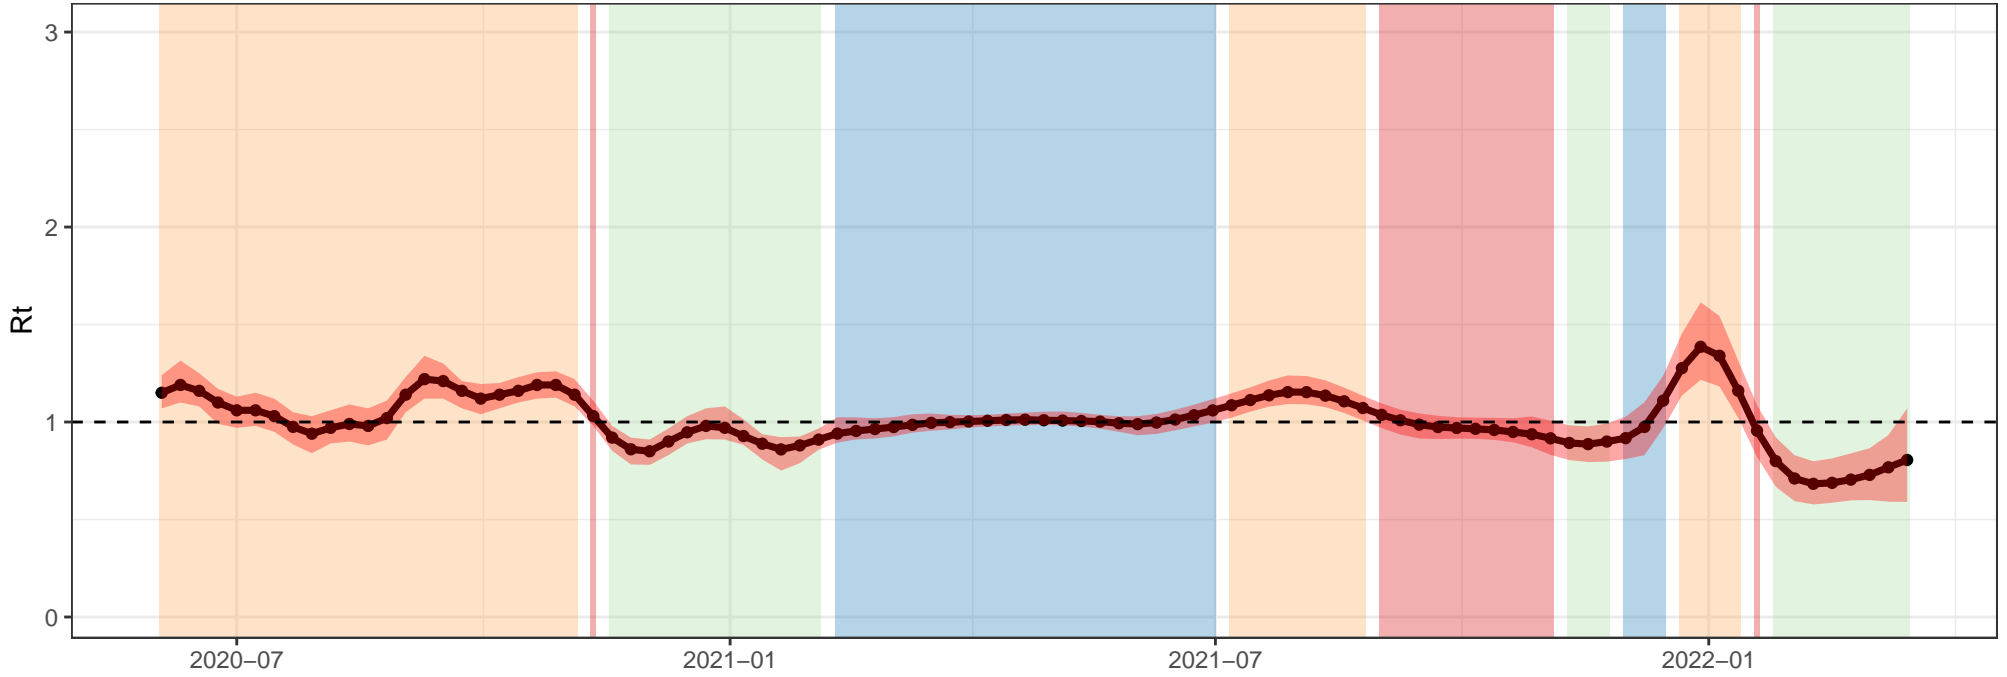

## Case counts w/ lagged phase categories\*

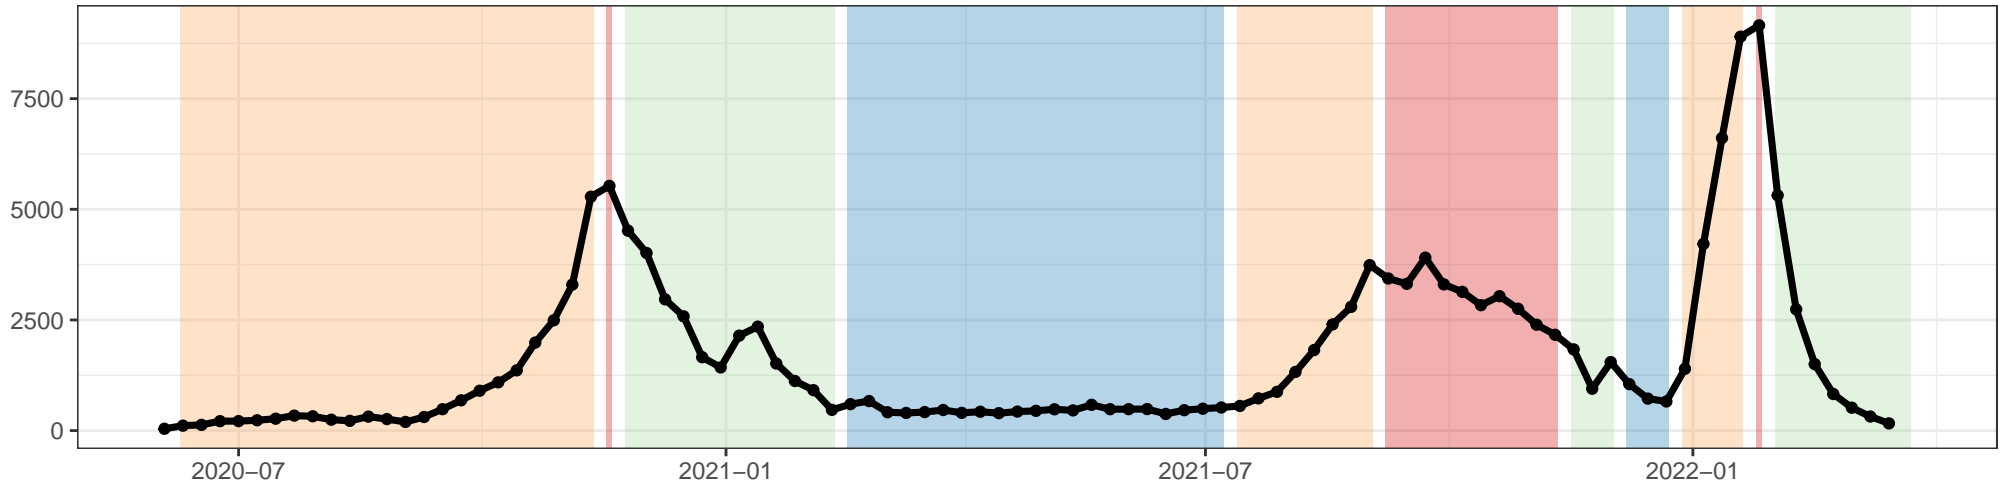

phase    increasing    decreasing    peak    nadir

\*Increasing/decreasing = Rt had a 90% probability  $\geq$  or  $\leq$  than 1.0.  
Wks b/w two increasing/decreasing phases  $\rightarrow$  classified as increasing/decreasing.  
Wks b/w increasing and decreasing phases = peaks; nadirs = wks b/w decreasing and increasing phases.
